# Supplementary material for: Single cell RNA-seq and ATAC-seq analysis of cardiac progenitor cell transition states and lineage settlement
Source: Springer Nature journal article supplement (doi:10.1038/s41467-018-07307-6), 2018-11-13
Supplement: MOESM4 [file 41467_2018_7307_MOESM4_ESM.pdf]

## Description of Additional Supplementary Files

**Supplementary Data 1. List of genes that are differentially expressed in Nkx2-5<sup>+</sup> CPC clusters.** Listed are all genes that were found to be up- or downregulated by a log fold change of >2 in cells of a cluster vs. all other cells by MAST (see Methods). Columns are: geneID: the Ensembl Gene ID, pval: the p-value of the estimate, lfc: log fold change, lfc.lo: the lower bound (95% CI) of the lfc, lfc.hi: the higher bound (95% CI) of the lfc, fdr.x: multiple testing corrected p-value, basemeanA: mean gene expression across cells in the cluster, basemeanB: mean gene expression across all other cells, auroc: area under the curve of the gene ranking approach, clusts: cluster for which the gene can be assigned as marker gene, marker\_pval: p-value of the gene ranking approach, marker\_fdr: multiple testing corrected p-value of the gene ranking approach.

**Supplementary Data 2. List of genes that are differentially expressed in Isl1<sup>+</sup> CPC clusters.** All genes are listed that are up- or downregulated by a log fold change of >2 in cells of a cluster vs. all other cells using MAST (see Methods). Columns are: geneID: the Ensembl Gene ID, pval: the p-value of the estimate, lfc: log fold change, lfc.lo: the lower bound (95% CI) of the lfc, lfc.hi: the higher bound (95% CI) of the lfc, fdr.x: multiple testing corrected p-value, basemeanA: mean gene expression across cells in the cluster, basemeanB: mean gene expression across all other cells, auroc: area under the curve of the gene ranking approach, clusts: cluster for which the gene can be assigned as marker gene, marker\_pval: p-value of the gene ranking approach, marker\_fdr: multiple testing corrected p-value of the gene ranking approach.

**Supplementary Data 3. List of gene correlation analysis results for Nkx2-5<sup>+</sup> and Isl1<sup>+</sup> cells.** Listed are Spearman Rank correlation values for all genes that were differentially expressed (all protein coding genes with an AUROC > 0.8, FDR < 0.01 and a lfc.low > 2 or lfc.hi < -2, FDR < 0.01 from Supplementary Tables 1 and 2). Cluster specific columns contain the local correlation of the gene within the cluster, the dpt column contains the (global) correlation of the genes expression with diffusion pseudotime.

**Supplementary Data 4. List of specific peaks obtained by scATAC-seq in each cluster.** Specific peaks for each cluster, chromatin coordinators, distance to the nearest genes and the gene symbols, and the q-value of each peak for each cluster are listed.

**Supplementary Data 5. List of parameters for quality statistics of processed bulk ATAC-seq samples.** Statistic parameter (i.e. number of raw/trimmed reads, mapping statistics from STAR, and results from a read deduplication step to remove PCR amplification artifacts) are listed.

**Supplementary Data 6. List of differential chromatin accessibility peaks of Isl1 KO cells.** The chromatin coordinator and nearest gene ID of each differential ATAC-seq peak are listed. Differential peaks were unified peaks of E8.5 and E9.5 Isl1 KO compared to Isl1<sup>+</sup>CD31<sup>+</sup> cells.

**Supplementary Data 7. List of differential chromatin accessibility peaks of Nkx2-5 CPCs.** The chromatin coordinator and nearest gene ID of each differential ATAC-seq peak are listed. The first tab contains all unified differential peaks of E7.5, E8.5 and E9.5 Nkx2-5 CPCs. The second tab contains all unified differential peaks of E9.5 and E12.5 Nkx2-5OE cells compared to E9.5 Isl1<sup>+</sup> and Nkx2-5<sup>+</sup> CPCs.
