# Supplementary material for: Single cell RNA-seq and ATAC-seq analysis of cardiac progenitor cell transition states and lineage settlement
Source: Nat Commun. 2018 Nov 19;9:4877. doi: 10.1038/s41467-018-07307-6 (PMC6242939; doi:10.1038/s41467-018-07307-6)
Supplement: Supplementary file 3 — Source Data [file 41467_2018_7307_MOESM3_ESM.xlsx]

## Sheet: Figure_1e
ISL1
c1run1_33_X_isl1.e8.5	c1run1_46_X_isl1.e8.5	c1run1_49_X_isl1.e8.5	c1run2_69_X_isl1.e8.5	c1run2_80_X_isl1.e8.5	c1run2_87_X_isl1.e8.5	c1run3_28_X_isl1.e9.5	c1run4_25_X_isl1.e9.5	c1run5_42_X_isl1.e7.5	c1run6_15_X_isl1.e8.5	c1run6_23_X_isl1.e8.5	c1run6_46_X_isl1.e8.5	c1run1_20_X_isl1.e8.5	c1run1_45_X_isl1.e8.5	c1run1_91_X_isl1.e8.5	c1run2_06_X_isl1.e8.5	c1run2_20_X_isl1.e8.5	c1run2_27_X_isl1.e8.5	c1run3_02_X_isl1.e9.5	c1run3_05_X_isl1.e9.5	c1run3_15_X_isl1.e9.5	c1run3_50_X_isl1.e9.5	c1run3_59_X_isl1.e9.5	c1run3_64_X_isl1.e9.5	c1run3_68_X_isl1.e9.5	c1run3_73_X_isl1.e9.5	c1run3_76_X_isl1.e9.5	c1run3_83_X_isl1.e9.5	c1run3_90_X_isl1.e9.5	c1run4_15_X_isl1.e9.5	c1run4_35_X_isl1.e9.5	c1run4_43_X_isl1.e9.5	c1run4_58_X_isl1.e9.5	c1run6_01_X_isl1.e8.5	c1run6_19_X_isl1.e8.5	c1run6_27_X_isl1.e8.5	c1run6_34_X_isl1.e8.5	c1run6_53_X_isl1.e8.5	c1run6_56_X_isl1.e8.5	c1run6_57_X_isl1.e8.5	c1run6_60_X_isl1.e8.5	c1run1_57_X_isl1.e8.5	c1run3_01_X_isl1.e9.5	c1run3_03_X_isl1.e9.5	c1run3_04_X_isl1.e9.5	c1run3_06_X_isl1.e9.5	c1run3_07_X_isl1.e9.5	c1run3_11_X_isl1.e9.5	c1run3_13_X_isl1.e9.5	c1run3_14_X_isl1.e9.5
Fli1	9.11479	9.30036	9.6742	4.74746	7.66501	8.5983	5.52117	7.44027	9.23497	7.6108	8.38272	6.94671	-1.63952	-2.92549	-2.92549	-2.92549	-2.92549	-2.92549	-2.92549	-2.92549	-1.20834	3.85626	-1.22459	-2.92549	-1.32722	-2.92549	-2.92549	-2.92549	-2.92549	-2.92549	-2.92549	-2.92549	-2.07467	-2.92549	-2.92549	-2.92549	-2.92549	1.02707	-2.92549	-2.92549	-2.92549	3.84747	3.54071	-2.92549	-1.45977	-2.92549	7.62669	3.54627	-2.92549
Ramp2	6.68585	7.40152	7.20886	7.81666	8.08743	6.86948	7.41659	5.71159	6.60155	7.65181	7.85773	8.68726	-1.58335	-1.58335	-1.58335	-1.58335	-1.58335	-1.58335	-1.58335	-1.58335	-1.58335	-1.58335	-1.58335	-1.58335	-1.58335	-1.58335	-1.58335	-1.58335	-1.58335	-1.58335	-1.58335	-1.58335	-1.58335	-1.58335	-1.58335	-1.58335	-1.58335	-1.58335	-1.58335	-1.58335	-1.58335	-1.58335	-1.58335	-1.58335	-1.58335	7.0965	-1.58335	-1.58335	-1.58335
Kdr	8.0075	8.30272	7.11921	4.44508	8.14516	7.52772	6.45403	6.04247	8.05859	7.31994	8.56095	7.56037	0.271752	-2.40873	-1.97878	-2.15073	-1.1892	-3.19673	-3.19673	-3.19673	-3.19673	-1.07982	-3.19673	-0.23042	6.36231	-3.19673	-1.19725	5.69776	-3.19673	3.37531	-3.19673	-3.19673	-3.19673	-0.95937	-1.6751	-3.19673	-3.19673	-3.19673	-3.19673	-3.19673	-3.19673	-2.33696	-3.19673	6.01166	-3.19673	-3.19673	-3.19673	-3.19673	-3.19673
Sox18	4.74025	11.0633	10.4781	6.87743	6.75082	6.5974	7.4381	0.625454	8.17752	9.07323	7.05799	5.22004	-0.57636	-0.57636	-0.57636	-0.57636	-0.57636	-0.57636	-0.57636	-0.57636	-0.57636	-0.57636	-0.57636	-0.57636	-0.57636	-0.57636	-0.57636	-0.57636	-0.57636	-0.57636	-0.57636	-0.57636	-0.57636	-0.57636	3.42086	-0.57636	-0.57636	-0.57636	-0.57636	0.447452	-0.57636	-0.57636	-0.57636	-0.57636	-0.57636	-0.57636	-0.57636	-0.57636	-0.57636
Elk3	6.6642	8.27833	7.39199	7.80694	7.68216	7.0849	7.47205	6.21654	2.56007	7.54585	7.33029	6.25524	-1.62801	-1.62801	-1.62801	0.440458	-1.62801	-1.62801	6.80142	-1.62801	-1.62801	-1.62801	-1.62801	-0.738987	-1.62801	-1.62801	-1.62801	-1.62801	-1.62801	7.02483	-1.62801	-1.62801	-1.62801	-1.62801	-1.62801	-1.62801	-1.62801	-1.62801	-1.62801	-1.62801	2.60041	-1.62801	6.25853	1.57782	-1.62801	-1.62801	3.94247	-1.62801	-1.62801
Egfl7	8.98441	7.34806	8.38269	6.2304	8.03283	9.01263	0.56604	6.91493	6.6535	7.01428	8.25739	4.63894	-2.89804	5.31864	5.06192	-2.89804	-2.08638	-2.89804	2.50285	-2.89804	-2.89804	6.93864	-2.89804	-2.89804	-2.89804	1.73366	-2.89804	3.97228	3.30741	-2.89804	-2.89804	6.59224	0.716603	4.17612	3.85224	-2.89804	5.9003	-0.536882	-2.89804	4.78558	4.12747	-1.50325	-2.89804	-2.89804	5.33057	-2.89804	-2.89804	1.31538	-2.89804
Tek	1.87358	9.74757	8.76044	9.02654	5.5101	9.85643	9.44887	6.08903	-1.05493	8.34989	3.16014	10.5718	6.8593	-1.05493	-1.05493	5.67864	5.52106	-1.05493	-1.05493	-1.05493	-1.05493	0.0240587	0.645976	0.380086	-1.05493	-0.323011	-1.05493	-0.0611247	2.15798	-1.05493	-1.05493	-1.05493	-1.05493	-1.05493	-1.05493	6.29668	-1.05493	-1.05493	-1.05493	-1.05493	-1.05493	-1.05493	-0.347016	0.689456	-1.05493	-1.05493	-0.170658	-0.111013	-1.05493
Eng	4.80932	9.41871	6.09025	6.49633	8.1385	6.18894	8.36927	5.40777	4.51868	3.06065	7.28445	5.23426	-0.943045	-0.943045	-0.943045	-0.943045	-0.943045	-0.943045	0.158503	-0.943045	-0.943045	-0.943045	-0.943045	-0.943045	-0.943045	-0.943045	-0.943045	-0.943045	-0.943045	0.310626	0.0720593	-0.943045	-0.943045	-0.943045	-0.943045	-0.943045	-0.943045	-0.943045	-0.943045	-0.943045	-0.943045	-0.943045	-0.235135	-0.943045	-0.943045	-0.943045	-0.943045	0.000868135	-0.943045
Calcrl	7.60917	9.77141	5.89771	4.8365	7.19409	5.06711	8.74004	6.94825	5.28812	8.83797	0.747006	8.79339	-2.54372	-1.75572	3.63843	-2.54372	-2.54372	-2.54372	-2.54372	-1.03248	4.16663	-2.54372	-1.73608	-2.54372	4.63593	-1.81181	-2.54372	-0.553028	-2.54372	-0.629558	-2.54372	-2.54372	0.184142	-2.54372	-2.54372	-2.54372	-2.54372	-2.54372	-2.54372	-2.54372	-2.54372	-2.54372	-1.36302	-2.54372	-2.54372	2.02728	-2.54372	-2.54372	4.20742
Ecscr	8.64778	8.84934	7.7114	7.50835	9.88765	7.55194	0.127305	7.11453	-1.29093	8.71582	8.2213	8.69912	-1.29093	-1.29093	-1.29093	-1.29093	-1.29093	0.370621	-1.29093	-1.29093	-1.29093	6.49156	-1.29093	-1.29093	-1.29093	-1.29093	-1.29093	4.88664	7.01362	-1.29093	1.7354	-1.29093	-1.29093	7.62237	-1.29093	-1.29093	-1.29093	-1.29093	-1.29093	7.44619	8.83041	-1.29093	-1.29093	-1.29093	-1.29093	-1.29093	-1.29093	-1.29093	-1.29093
Esam	8.52959	10.3706	6.83774	8.48067	9.87274	9.34254	-0.592822	10.2277	4.55513	8.97336	8.39074	-0.592822	-0.592822	-0.592822	-0.592822	-0.592822	-0.592822	-0.592822	-0.592822	-0.592822	-0.592822	-0.592822	-0.592822	-0.592822	-0.592822	0.139093	-0.592822	-0.592822	-0.592822	-0.592822	-0.592822	-0.592822	-0.592822	-0.592822	-0.592822	-0.592822	-0.592822	-0.592822	-0.592822	-0.592822	-0.592822	-0.592822	-0.592822	-0.592822	-0.592822	-0.592822	-0.592822	-0.592822	-0.592822
Plxnd1	8.86702	9.22573	4.59593	5.93751	8.16705	7.13836	6.44714	5.81865	-1.14166	6.68244	8.40487	7.25432	-1.14166	-1.14166	-1.14166	-1.14166	-1.14166	-1.14166	-1.14166	-1.14166	-1.14166	-1.14166	-1.14166	0.293347	-1.14166	3.73687	-1.14166	3.60126	-1.14166	-1.14166	-1.14166	-1.14166	1.18535	-1.14166	-1.14166	0.198255	2.84083	-1.14166	-1.14166	-0.117853	-1.14166	-1.14166	7.9737	-1.14166	-1.14166	-1.14166	-1.14166	-1.14166	-1.14166
Rasip1	7.46073	7.09261	2.24449	8.22419	8.64885	9.14579	3.73319	7.63446	-0.720154	6.97027	6.97662	9.24999	-0.720154	-0.720154	-0.720154	-0.720154	-0.720154	2.14552	-0.720154	-0.720154	-0.720154	-0.720154	-0.720154	-0.720154	-0.720154	-0.720154	-0.720154	-0.720154	-0.720154	-0.720154	-0.720154	-0.720154	-0.720154	-0.720154	-0.720154	-0.720154	-0.720154	6.22314	-0.720154	-0.720154	-0.720154	-0.720154	-0.720154	-0.720154	5.84037	-0.720154	-0.720154	-0.720154	-0.720154
Flt1	8.49922	8.82746	8.25635	8.10784	7.50851	6.38248	-1.43219	7.68396	6.05181	5.94677	4.42851	9.60405	-1.43219	-1.43219	8.61125	-1.43219	-1.43219	-0.648781	-1.43219	-1.43219	-0.614463	-0.353203	-1.43219	-1.43219	-1.43219	-0.700273	-1.43219	-0.438386	-1.43219	-1.43219	-1.43219	-1.43219	-1.43219	-1.43219	2.38524	-1.43219	6.24446	-1.43219	-1.43219	-1.43219	0.389512	-1.43219	-1.43219	-1.43219	-1.43219	-1.43219	-1.43219	-1.43219	4.79973
Myzap	9.57933	8.98363	9.17872	6.32464	9.16525	6.3262	-0.745205	5.11806	2.00811	8.3113	6.68381	6.7588	-0.745205	-0.745205	-0.745205	-0.745205	0.0664597	-0.745205	5.51456	-0.745205	-0.745205	-0.745205	-0.745205	8.45858	-0.745205	-0.745205	-0.745205	4.66893	-0.745205	-0.745205	-0.745205	-0.745205	-0.745205	-0.745205	-0.745205	-0.745205	-0.745205	-0.745205	-0.745205	-0.745205	-0.745205	-0.745205	-0.745205	-0.745205	-0.745205	-0.745205	-0.745205	-0.745205	-0.745205
Flt4	8.34385	9.79342	8.16919	5.81201	9.58504	8.7631	-0.719595	3.21616	7.52114	5.53222	6.0142	5.37149	-0.719595	-0.719595	-0.719595	-0.719595	0.0920694	-0.719595	-0.719595	-0.719595	-0.719595	-0.719595	1.92482	-0.719595	-0.719595	-0.719595	-0.719595	-0.719595	-0.719595	-0.719595	-0.719595	-0.719595	-0.719595	-0.719595	-0.719595	-0.719595	-0.719595	-0.719595	-0.719595	-0.719595	-0.719595	-0.719595	-0.719595	-0.719595	-0.719595	-0.719595	-0.719595	-0.719595	-0.719595
Tal1	9.21801	7.55375	6.85442	4.32778	6.10851	8.39797	5.28605	3.95939	9.64463	-0.649721	8.28287	6.43075	-0.649721	-0.649721	-0.649721	-0.649721	-0.649721	-0.649721	-0.649721	-0.649721	-0.649721	-0.649721	-0.649721	-0.649721	-0.649721	-0.649721	-0.649721	-0.649721	-0.649721	-0.649721	-0.649721	-0.649721	-0.649721	-0.649721	-0.649721	-0.649721	-0.649721	-0.649721	-0.649721	-0.649721	-0.649721	-0.649721	-0.649721	-0.649721	-0.649721	-0.649721	-0.649721	-0.649721	-0.649721
Zc3hav1	8.77748	4.74558	8.66313	8.47215	7.08996	8.88186	8.23607	7.54683	9.50861	4.46748	-1.68615	7.73445	-1.68615	-1.68615	-1.68615	-1.68615	-1.68615	-1.68615	-1.68615	8.30213	-1.68615	-1.68615	-1.68615	-1.68615	-1.68615	-1.68615	-1.68615	3.25603	-1.68615	-1.68615	-1.68615	6.93704	-0.835322	-1.68615	-1.68615	-1.68615	-1.68615	-1.68615	-1.68615	5.79545	-1.68615	-1.68615	-1.68615	-1.01928	7.74666	-1.68615	-1.68615	-1.68615	-1.68615
Hhex	4.74215	3.8811	9.70334	2.75184	9.60225	8.72273	6.56346	4.01333	8.46711	5.27995	8.27113	2.45605	-1.30891	-1.30891	-1.30891	-1.30891	-1.30891	-1.30891	-1.30891	-1.30891	-1.30891	-1.30891	-1.30891	-1.30891	-0.298921	-1.30891	-1.30891	-0.315112	-1.30891	-1.30891	-1.30891	-1.30891	-1.30891	-1.30891	-1.30891	-1.30891	-1.30891	-1.30891	-1.30891	-1.30891	-1.30891	8.74671	-1.30891	-1.30891	8.43679	-1.30891	-1.30891	-1.30891	-1.30891
Myo1c	6.90649	8.18938	8.10591	3.24795	7.34946	7.86803	2.30321	3.73467	5.18011	7.14234	5.42927	5.4439	-1.84458	-1.84458	-1.84458	-1.84458	-1.03292	2.90832	-1.84458	-1.84458	-1.84458	7.85599	3.99528	2.51959	7.55901	-1.84458	-1.84458	6.02569	2.28835	-1.84458	-1.84458	-1.84458	4.78523	-1.84458	-1.84458	4.71634	6.97756	4.57876	-1.84458	0.779853	4.6015	-1.84458	-1.84458	-1.84458	-1.84458	-1.84458	-1.84458	-1.84458	-1.84458
Sox7	6.65246	9.51705	7.22794	4.10197	8.44183	7.77675	-0.613675	6.17062	7.27171	5.73007	8.51281	4.09722	-0.613675	-0.613675	-0.613675	-0.613675	-0.613675	-0.613675	-0.613675	-0.613675	-0.613675	-0.613675	-0.613675	-0.613675	-0.613675	-0.613675	-0.613675	-0.613675	-0.613675	-0.613675	-0.613675	-0.613675	-0.613675	-0.613675	-0.613675	-0.613675	-0.613675	-0.613675	-0.613675	-0.613675	-0.613675	-0.613675	-0.613675	-0.613675	-0.613675	-0.613675	-0.613675	-0.613675	-0.613675
Arhgef15	9.08691	8.94799	1.44477	6.77036	4.32511	8.75367	4.23718	3.50309	-0.760248	7.03158	8.48587	6.96023	-0.760248	-0.760248	-0.760248	-0.760248	-0.760248	-0.760248	0.341301	-0.760248	-0.760248	-0.760248	0.0473937	0.674764	-0.760248	-0.760248	0.561265	1.55175	-0.760248	-0.760248	-0.760248	-0.760248	-0.760248	-0.760248	-0.760248	-0.760248	-0.760248	-0.760248	-0.760248	-0.760248	-0.760248	-0.760248	-0.760248	-0.760248	-0.0936339	0.034253	0.124021	-0.760248	-0.760248
Cdh5	8.39759	9.43845	-0.54744	7.13166	9.67375	3.4374	9.20894	8.0639	5.51952	8.84666	-0.54744	7.36123	-0.54744	-0.54744	-0.54744	-0.54744	-0.54744	-0.54744	-0.54744	-0.54744	-0.54744	-0.54744	-0.54744	-0.54744	-0.54744	-0.54744	-0.54744	-0.54744	-0.54744	-0.54744	-0.54744	-0.54744	-0.54744	-0.54744	-0.54744	-0.54744	-0.54744	-0.54744	-0.54744	-0.54744	-0.54744	-0.54744	-0.54744	-0.54744	-0.54744	-0.54744	-0.54744	-0.54744	-0.54744
Rhoj	7.25587	7.44076	7.67771	5.97309	4.3753	7.5504	-0.737256	2.40053	7.79958	6.76651	7.28616	5.44005	-0.737256	-0.737256	-0.737256	-0.737256	0.970139	-0.737256	-0.737256	-0.737256	-0.737256	-0.737256	-0.737256	-0.737256	-0.737256	-0.737256	-0.737256	-0.737256	-0.737256	-0.737256	-0.737256	-0.737256	-0.737256	-0.737256	-0.737256	-0.737256	6.24984	-0.737256	-0.737256	-0.737256	-0.737256	-0.737256	-0.737256	-0.737256	-0.737256	-0.737256	2.9455	-0.737256	-0.737256
Fam212a	3.7378	5.81802	6.87755	0.692473	6.79723	6.73189	4.06591	6.95487	8.03595	7.06854	5.97591	5.48906	-1.94662	-1.94662	-1.94662	-1.94662	-1.94662	3.02101	-1.94662	-1.94662	-1.94662	-1.94662	-1.94662	-1.94662	-1.94662	-1.94662	-1.94662	3.53309	-1.94662	-1.94662	-1.94662	4.57116	-1.94662	6.78947	-1.94662	-1.94662	-1.94662	-1.94662	-1.94662	-1.94662	-1.94662	-1.94662	-1.94662	-1.94662	-1.94662	7.83019	-1.94662	-1.94662	-1.94662
Nid1	3.26103	8.58553	1.77111	6.16532	9.0426	6.17367	7.36289	5.61282	2.47042	6.38828	6.40328	6.7011	-2.8941	-2.8941	-2.8941	-2.8941	-2.8941	-2.8941	-1.79255	-1.73467	-0.876002	-1.81512	3.01945	-2.8941	-2.8941	-0.788352	-0.89462	-0.903408	-0.533431	-1.64043	-2.8941	-2.8941	-0.166238	-2.8941	1.96723	-2.8941	-2.8941	-2.8941	-2.8941	-2.8941	2.0795	-2.8941	-2.18619	7.02511	-2.8941	-2.8941	7.08493	-2.8941	-1.40414
Tbc1d9b	6.5375	7.86686	5.0484	5.11739	7.42236	6.62094	1.85111	6.02765	5.0102	4.43513	6.61808	5.04349	4.88822	6.8864	1.19059	-2.42676	-2.42676	-2.42676	-2.42676	6.45483	-2.42676	-2.42676	7.24146	-2.42676	-0.0888746	-2.42676	-2.42676	-2.42676	-2.42676	1.32388	-2.42676	-2.42676	-2.42676	2.67918	-2.42676	-0.404303	-2.42676	-2.42676	-0.05495	6.89885	4.54149	-2.42676	-2.42676	7.09474	-2.42676	7.69918	-2.42676	6.16989	3.77002
Plvap	7.32727	6.73178	6.79725	6.52751	5.63182	5.62036	3.49751	3.87795	-1.00988	6.45346	6.65601	8.54562	-1.00988	-1.00988	-1.00988	-1.00988	-1.00988	-1.00988	-1.00988	-1.00988	-1.00988	-1.00988	-1.00988	-1.00988	-1.00988	-1.00988	-1.00988	-1.00988	-1.00988	-1.00988	-1.00988	-1.00988	-1.00988	-1.00988	-1.00988	-1.00988	-1.00988	-1.00988	-1.00988	-1.00988	-1.00988	-1.00988	-1.00988	7.52162	-1.00988	-1.00988	-1.00988	-1.00988	-1.00988
Dusp3	8.06921	6.27208	6.33983	5.00603	6.29657	5.13009	2.96006	6.18855	6.38264	4.93141	3.9534	5.32189	-4.1413	-2.32805	-0.178953	-0.149686	-4.1413	-4.1413	-3.03975	5.13986	4.83911	4.36527	2.01923	6.95182	4.11638	-4.1413	4.06258	-0.567721	6.40649	5.5331	6.08779	4.44147	6.94742	5.60347	-4.1413	-4.1413	1.58184	2.13576	4.89668	4.16034	1.95045	5.12344	-4.1413	-4.1413	2.2377	-4.1413	-4.1413	-3.19739	4.47232
Adgrf5	7.47827	7.17107	3.47873	7.22846	9.29182	9.06083	-0.70327	6.50552	-0.70327	6.76008	6.25098	8.08401	-0.70327	-0.70327	-0.70327	-0.70327	-0.70327	-0.70327	-0.70327	-0.70327	-0.70327	-0.70327	-0.70327	-0.70327	-0.70327	-0.70327	-0.70327	-0.70327	-0.70327	-0.70327	-0.70327	-0.70327	-0.70327	-0.70327	-0.70327	-0.70327	-0.70327	-0.70327	-0.70327	-0.70327	-0.70327	-0.70327	-0.70327	-0.70327	-0.70327	-0.70327	-0.70327	0.240643	-0.70327
Ttn	-1.71818	-3.17153	-2.89669	-3.82473	-3.82473	-3.82473	-2.94793	-0.917565	-3.82473	-3.82473	-0.534005	-0.0597725	8.51466	11.0712	10.857	9.86716	7.92089	8.70308	7.61954	6.3743	9.94002	9.36062	10.1486	11.113	9.31493	11.7223	11.3356	11.9124	9.48788	5.78345	2.89153	2.06137	8.7072	9.70075	6.80949	8.31074	10.3032	11.0188	10.6445	4.58431	10.4735	-1.07987	-2.00353	-1.17198	-1.64711	-2.14511	5.59046	-1.3345	0.989418
Actc1	-1.49253	-2.62529	-2.17714	-4.06782	-4.06782	-4.06782	-2.64958	-4.06782	-4.06782	-4.06782	-4.06782	-4.06782	7.51788	9.30213	9.87347	10.5779	8.47341	9.65503	10.4556	11.3796	12.1353	10.5065	9.26845	12.8825	10.8233	9.90856	11.7453	11.9438	11.9196	6.12385	-0.339618	3.76782	3.37978	11.3341	1.33017	11.7479	10.9066	11.4376	12.5782	-3.04401	11.9016	-1.15747	6.5128	5.39602	4.72804	-3.27332	-1.9358	-4.06782	-4.06782
Acta2	-2.34752	-1.666	-1.46488	-2.69077	-2.30488	-3.27946	-0.682508	0.676445	-4.14659	3.23236	-4.14659	-4.14659	5.60602	9.54353	8.24201	8.34944	4.42375	7.66196	10.0449	9.80473	10.2329	10.2395	9.92501	10.8163	9.10919	10.278	9.46103	9.81576	11.0896	8.35924	5.65821	3.73162	8.96977	10.2512	7.15345	8.70712	7.01737	10.4985	11.0766	7.14082	10.734	-3.28682	1.06698	4.2455	5.31294	-4.14659	-3.26232	-2.23156	-1.93944
Tnnt2	-1.06408	-3.42396	-3.42396	-3.42396	-3.42396	-3.42396	-0.834727	-3.42396	-3.42396	2.10346	-3.42396	-3.42396	6.72207	9.25538	9.34912	7.91867	5.31653	6.86304	9.4772	9.41012	8.93544	8.42944	6.7328	9.45421	7.34162	9.67458	8.54869	9.25558	9.92891	6.35764	5.32713	3.89828	4.57447	9.90587	7.87394	8.10873	9.20004	9.71354	10.2318	5.95413	9.77964	-3.42396	4.75834	4.05077	0.49216	-3.42396	-3.42396	-3.42396	-3.42396
Nebl	-3.20413	-3.20413	-3.20413	-3.20413	-3.20413	-3.20413	-3.20413	-3.20413	0.43803	-3.20413	-3.20413	-3.20413	8.03353	9.38553	9.15887	8.38428	7.67761	6.74047	5.79278	8.82989	9.75313	8.12273	7.58322	9.5348	4.36258	8.39654	9.04266	10.1418	8.30529	9.33087	7.10783	3.41752	7.08971	9.32125	5.85226	8.9424	9.02757	9.71646	9.97619	5.32679	9.8574	-3.20413	-3.20413	4.44121	-3.20413	-1.90023	-3.20413	-2.26022	5.74131
Myl4	-3.3112	-3.3112	2.45059	-3.3112	-3.3112	-3.3112	1.75986	-3.3112	-3.3112	-3.3112	-3.3112	-3.3112	7.65285	9.7814	9.12025	8.35111	6.52498	7.74247	9.37252	9.71477	10.0031	8.78881	7.36543	9.72411	7.75651	9.69486	9.60781	9.60952	10.1077	6.16579	-3.3112	1.51462	5.14222	9.05526	7.28366	9.36454	8.46921	9.05336	9.61035	6.91839	9.38583	-1.22068	3.95832	-0.105369	3.5914	6.17486	0.371553	-3.3112	-0.269387
Tnnc1	-1.52899	-2.39819	-1.47015	-2.39819	-2.39819	-2.39819	-1.5214	-2.39819	-2.39819	-2.39819	-2.39819	-2.39819	5.78951	10.311	9.5609	7.99039	5.05058	9.04964	6.82301	10.7003	10.4664	9.73185	9.41244	10.6791	8.51046	9.91698	10.2375	10.2463	9.96685	6.5818	-2.39819	3.10837	3.76593	10.372	-2.39819	7.27909	8.52419	9.9757	11.2321	7.00872	10.467	-0.614002	5.64552	2.44068	-2.39819	-2.39819	5.5559	-2.39819	-2.39819
Myl7	-3.72552	-5.52459	0.4385	-0.258652	-5.52459	-2.31664	2.2186	0.30608	0.271259	2.36198	-1.6989	-5.52459	7.42874	8.86198	8.86283	7.93845	5.81075	7.47762	7.88916	9.9433	9.53847	8.99505	7.88822	9.44411	6.86328	8.52819	9.14993	8.81393	9.84276	4.62726	2.45954	0.851876	5.50427	8.5786	5.98346	8.71705	8.96731	9.08575	9.93556	5.7075	9.90951	0.374153	4.08297	3.46444	3.4197	2.54338	-5.52459	-5.52459	-4.03463
Unc45b	-1.90087	-1.24767	-1.90087	-1.90087	1.87681	-1.90087	-1.90087	-0.69906	-1.90087	-1.90087	-1.90087	-1.90087	6.38743	8.52986	7.66556	8.54169	9.09362	3.25363	6.47298	9.47461	8.57877	9.07187	7.36167	8.90077	8.73989	8.04503	7.47347	8.63572	9.43114	7.98681	6.22183	-0.462558	7.29183	9.74535	4.4799	5.18405	8.55442	9.11593	7.08166	1.14054	8.33847	-1.90087	-1.90087	-1.90087	-1.90087	-1.90087	-1.90087	-0.956961	-1.90087
Tnni1	-4.69343	-5.56263	-5.56263	-5.56263	-5.56263	1.3986	3.71705	2.64763	-5.56263	1.58083	-5.56263	-5.56263	5.49103	6.41592	6.68393	5.99757	6.37203	5.90409	8.43548	8.39508	8.05749	8.14017	7.07562	8.47289	7.1339	8.2761	8.14279	8.45441	8.91986	7.14742	7.56759	4.08357	7.17526	8.21705	5.37683	6.76199	7.44988	7.76542	8.64451	7.71747	8.14029	-4.16784	1.92115	3.20892	-1.76338	4.40828	1.91815	-4.05295	2.09399
Myocd	-2.35975	-2.35975	-2.35975	-2.35975	-2.35975	-2.35975	-2.35975	-2.35975	-2.35975	-2.35975	-2.35975	1.40521	8.35547	3.82864	5.81407	10.0403	5.4118	2.39316	7.5247	3.44502	8.53083	0.354554	9.72207	8.62953	8.36838	8.87731	5.60535	8.29406	8.37797	8.04582	3.64711	2.46608	4.33864	8.8919	8.8116	9.11357	7.68465	8.72047	6.11014	6.39474	8.73108	-2.35975	-2.35975	-2.35975	-2.35975	-1.56525	-2.35975	-0.128633	-2.35975
Myl9	-3.12477	-3.12477	-1.23409	-3.12477	-2.40573	-3.12477	-3.12477	-3.12477	4.21325	6.63739	-3.12477	-3.12477	2.29192	6.9228	5.34995	7.07165	4.63174	4.36592	7.51031	9.30615	9.26426	9.38222	7.95088	9.05187	1.14203	9.54783	8.27862	9.63451	9.40453	6.07495	4.1905	-1.68645	6.94579	8.92389	0.487223	8.54849	5.1604	8.85521	9.63652	7.40424	9.55198	1.67674	5.35753	-1.38039	5.66727	-3.12477	-0.738194	-3.12477	-3.12477
Sh3bgr	-2.52168	-2.52168	4.30915	3.23763	-2.52168	-2.52168	-2.52168	-2.52168	-2.52168	0.941336	3.63392	-2.52168	5.24788	8.39785	7.6241	5.11534	6.45772	5.75626	8.30398	9.46817	8.8382	8.53901	7.63127	9.15557	5.45816	8.34908	8.34992	8.94619	8.97706	6.28181	-2.52168	3.85479	5.67547	6.91307	5.10382	8.3513	7.28701	8.66865	9.42087	-2.52168	7.84376	-2.52168	-2.52168	-2.52168	-2.52168	-2.52168	-2.52168	-2.52168	-2.52168
Nexn	-1.65281	4.53122	-3.08465	-1.01765	-4.01269	-4.01269	-2.20168	1.60527	1.62574	-4.01269	-4.01269	-4.01269	6.31225	9.03058	8.84055	7.26149	6.11984	5.6274	5.35082	7.36531	7.42461	7.2018	7.26395	7.24804	7.24084	7.81661	6.47646	6.34558	7.88614	7.6641	6.06582	2.55796	5.88027	6.50384	5.76632	7.82411	7.35988	8.07818	7.02162	-1.38826	7.67955	-1.45479	-4.01269	-2.54652	-4.01269	4.44405	-4.01269	-4.01269	-4.01269
Mybpc3	-1.60883	-1.60883	-1.60883	-1.60883	-1.60883	-1.60883	-1.60883	-1.60883	-1.60883	-1.60883	-1.60883	-1.60883	3.85564	9.58761	7.10792	4.65046	3.42326	4.98987	11.4005	3.991	9.0839	9.25317	7.53777	9.70114	9.49588	10.1507	8.9306	7.91598	8.86755	2.41169	3.81283	1.00709	0.161194	8.3522	4.52524	8.63289	6.74324	8.32722	10.4318	-1.60883	9.67477	-1.60883	-0.900922	-1.60883	-1.60883	-1.60883	-1.60883	-1.60883	-1.60883
Myh6	-2.19147	-2.19147	-2.19147	-2.19147	-2.19147	-2.19147	-0.0720507	-2.19147	-0.238639	-2.19147	-2.19147	-2.19147	-2.19147	8.20034	9.40181	9.27174	-1.3798	9.37563	12.1818	10.8114	11.7868	10.9652	0.00833617	12.4972	9.1338	10.4523	10.7509	12.2066	9.2918	-2.19147	-0.892749	5.45126	-2.19147	9.35705	6.57376	9.17629	9.0293	10.1004	10.5728	-2.19147	9.16452	-2.19147	9.09697	6.2965	2.67606	-0.879008	-0.368742	-0.681781	-0.701506
Tagln	-3.1491	-0.999854	-2.22105	-1.69327	-1.59414	-2.28196	2.95398	-1.94729	-3.1491	-3.1491	-3.1491	-3.1491	0.794321	5.44389	5.58573	2.36571	3.8324	5.31713	7.14255	7.06575	7.5195	9.71921	7.60792	7.11672	5.35054	9.18854	9.38196	8.99393	9.83922	6.00577	7.87741	1.02885	7.42806	10.0869	3.23168	8.64417	1.6011	7.34165	9.09319	8.43291	9.43866	-1.05858	-3.1491	4.54209	-3.1491	-3.1491	-3.1491	-3.1491	-3.1491
Cnn1	-1.63887	-0.196332	-1.63887	-1.63887	-0.919826	-1.63887	-1.63887	-1.63887	-1.63887	-1.63887	-1.63887	-1.63887	3.51182	4.93809	7.10492	7.52034	5.63789	3.07492	8.78862	9.70531	9.69738	8.717	7.41912	9.62737	8.07799	9.68851	7.94728	10.6102	9.68329	3.20358	-1.63887	-1.63887	7.44697	10.6911	3.55301	6.78108	4.18199	6.7182	8.32955	-1.63887	8.96378	-1.63887	-1.63887	-1.63887	-1.63887	-1.63887	-1.63887	-1.63887	-1.63887
Csrp3	-1.50968	-1.50968	-1.50968	-1.50968	-1.50968	-1.50968	-1.50968	-1.50968	-1.50968	-1.50968	-1.50968	-1.50968	6.45527	-0.214914	6.39147	6.23869	7.5878	6.17048	9.58146	9.8297	9.84181	6.95661	8.57812	9.56698	9.5716	7.14184	10.1525	8.7187	8.89015	2.24096	-1.50968	-1.50968	-1.50968	5.6974	6.22124	8.91194	6.77549	8.16667	7.77711	-1.50968	9.50895	-1.50968	-0.801769	-1.50968	-1.50968	-1.50968	-1.50968	-1.50968	-0.0197183
Popdc2	-3.0842	-3.0842	-3.0842	-3.0842	-3.0842	-3.0842	-3.0842	1.86564	-3.0842	1.31187	-3.0842	-3.0842	7.89492	3.83878	4.54246	6.20326	5.45719	4.32314	9.32497	8.33601	7.55071	7.17794	5.09442	7.13151	7.27713	5.43044	7.48087	8.49057	7.66705	-0.718672	5.39264	2.84302	4.31971	6.91066	6.80424	4.80351	3.97674	7.0019	5.98432	5.26209	6.68518	-2.22443	-3.0842	2.53871	-3.0842	3.24355	-3.0842	-0.593968	-3.0842
Cryab	-1.56154	-1.56154	-1.56154	-1.56154	-1.56154	-1.56154	-1.56154	-1.56154	-1.56154	-1.56154	-1.56154	6.12994	5.04397	7.55411	7.61805	5.39867	-1.56154	8.69601	7.71669	9.96955	8.77569	8.73941	7.17722	9.12401	5.15863	8.31811	8.73641	9.29178	9.06205	4.39072	-1.56154	3.576	-1.56154	8.90284	-1.56154	-0.221618	7.88334	8.36534	9.72352	-0.537726	10.1742	-1.56154	-1.56154	-1.56154	-1.56154	-1.56154	-1.56154	-1.56154	-1.56154
Rbm24	-3.69363	-3.69363	-3.69363	1.2434	-3.69363	-3.69363	-3.69363	3.75955	-1.7408	-3.69363	1.29511	-3.69363	7.49952	7.3651	5.12198	8.42519	6.88388	6.34893	5.38198	5.78006	6.04252	6.34426	7.50318	5.89083	4.19039	7.09704	6.12107	5.3274	6.09099	5.78056	5.3448	-3.69363	5.10258	6.10537	3.30906	6.89798	6.99636	6.76142	4.69464	5.24226	5.52728	-3.69363	-1.87243	-2.57244	-3.69363	-3.69363	-2.80936	-3.69363	-3.69363
Ankrd1	-2.05605	-2.05605	-2.05605	-2.05605	0.229805	-2.05605	-2.05605	3.21853	-2.05605	-2.05605	-2.05605	-2.05605	-2.05605	1.22494	-2.05605	9.43592	-2.05605	8.84928	9.19557	10.7286	6.07386	12.3216	9.007	10.5616	-2.05605	11.1072	10.2483	9.00501	10.2201	-0.141884	5.0506	6.25392	0.01919	10.2884	-2.05605	8.42552	-2.05605	12.4882	11.4477	2.31079	12.0956	-2.05605	3.38491	4.08023	3.19198	-2.05605	-2.05605	-2.05605	-0.566086
Myl3	0.574256	-0.879092	-1.5323	-1.5323	-1.5323	-1.5323	-1.5323	-1.5323	-1.5323	-1.5323	-1.5323	-1.5323	-1.5323	10.5775	10.9958	9.60537	-1.5323	8.91078	3.90721	10.6009	7.99607	8.71552	5.93801	10.9596	-1.5323	11.7935	9.22023	11.4066	11.782	9.11037	-1.5323	-1.5323	-1.5323	10.1207	-1.5323	-1.5323	7.7591	9.80779	10.7521	-1.5323	9.71705	-0.137507	-1.5323	-1.5323	-1.5323	-1.5323	-1.5323	-0.588384	-1.5323
Ldb3	-1.36153	-1.36153	-1.36153	-1.36153	-1.36153	-1.36153	-0.484727	-1.36153	-1.36153	-1.36153	-1.36153	-1.36153	-0.0755511	-0.57352	9.19961	7.92613	-0.549861	5.90425	8.30427	8.77879	9.95846	7.36182	4.81406	9.37173	8.65414	7.90274	7.61792	8.01193	8.73246	9.70281	-1.36153	0.0767915	-1.36153	7.59557	-1.36153	7.27929	6.3664	8.18514	7.03874	-1.36153	9.93667	-1.36153	4.21965	-1.36153	-1.36153	4.46681	0.770497	-1.36153	-1.36153
Myh7	-1.78264	-1.12944	-1.78264	-1.78264	-1.78264	-1.78264	-1.78264	0.510393	-1.78264	-1.78264	-1.78264	-1.78264	-0.496669	11.6426	10.8927	1.67799	-1.78264	7.23481	3.37413	6.07816	0.581558	11.4266	8.59763	2.12888	-0.61458	11.8094	5.80632	6.25499	12.0643	4.43414	7.50409	2.34115	0.91873	10.3683	-1.78264	-1.78264	2.79937	10.859	12.0481	7.84251	11.0897	-0.909974	5.93131	-0.77493	-1.78264	6.28335	0.603931	-1.78264	-1.78264
Myom1	-1.29074	-1.29074	-1.29074	-1.29074	-1.29074	-1.29074	-1.29074	-1.29074	-1.29074	-1.29074	-1.29074	-1.29074	4.89756	7.52333	6.15273	2.88213	-1.29074	4.3121	2.69985	9.39628	9.56997	5.91731	7.11613	8.87698	4.01407	9.46506	7.79204	6.76297	8.547	6.10604	-0.27564	4.21582	3.6881	8.74368	-1.29074	5.27018	-1.29074	8.89892	8.43364	-0.266932	9.06913	-1.29074	-1.29074	-1.29074	-0.624131	-1.29074	-1.29074	-1.29074	5.43597
Ccdc141	-3.87675	-3.87675	-3.87675	3.86832	-3.87675	-3.87675	-2.99995	-3.87675	-3.87675	-3.87675	-3.87675	0.276473	6.339	6.22526	6.86786	6.37616	6.7227	3.80848	6.83229	5.91169	7.48314	8.07555	5.69946	8.17837	5.52252	3.12192	7.41027	8.91819	6.69132	4.62449	-1.2667	2.7449	-3.87675	4.99711	5.64753	7.04943	6.17773	6.68484	5.29636	0.923657	6.42637	2.35481	1.77884	-3.20987	-3.87675	-3.87675	5.80232	-3.87675	-0.104682
Hspb2	-1.21102	-1.21102	-1.21102	-1.21102	-1.21102	-1.21102	-1.21102	-1.21102	-1.21102	-1.21102	-1.21102	-1.21102	4.51103	9.02915	3.50032	7.20123	-1.21102	5.14254	-1.21102	9.61044	8.30388	8.9257	4.40435	8.95991	5.14851	7.13831	8.84018	7.70436	8.59908	4.24575	2.81718	6.66719	-1.21102	7.38665	-1.21102	-1.21102	6.07877	8.59102	9.8508	-1.21102	9.88483	-1.21102	-1.21102	0.967146	2.91377	-1.21102	-1.21102	-1.21102	-1.21102
Mef2c	1.51681	6.35515	-3.21619	-4.14423	4.47242	-4.14423	2.23006	3.39214	-4.14423	5.42194	-1.71314	0.967865	8.29681	6.26505	6.33483	7.70747	6.01522	3.48954	6.29044	7.08157	0.182421	5.86591	6.83925	6.23482	6.34429	6.47095	6.53763	6.20091	4.70418	5.1412	2.42466	-2.70592	4.25185	6.54293	5.08403	7.17333	7.68982	6.56194	-1.77242	5.03735	5.73066	-2.74944	-3.43632	1.1484	-4.14423	-2.84033	-0.124093	-4.14423	7.06897
Ptn	-5.26267	-5.26267	-5.26267	-5.26267	-5.26267	-5.26267	3.72067	4.69504	2.15018	-5.26267	-0.741297	-5.26267	-1.79418	-5.26267	-5.26267	3.6981	-1.25326	-3.05917	-2.78153	-3.2326	3.21461	-5.26267	4.13888	-4.37365	3.54184	-5.26267	-5.26267	-5.26267	-3.85427	-0.287295	2.8914	3.53697	-0.864296	-5.26267	-5.26267	-3.92275	-0.725957	-5.26267	0.332081	-2.22125	-5.26267	-5.26267	4.19959	3.28704	-5.26267	4.40112	3.99797	4.05769	3.48448
Phlda2	0.525266	-3.60042	4.74871	6.71369	-4.25362	4.64511	2.78488	-4.25362	5.51767	1.68099	6.29618	-4.25362	5.74805	-0.595187	-2.67384	3.27941	4.81371	-4.25362	-4.25362	-4.25362	-4.25362	0.849728	5.58743	-4.25362	4.94866	-4.25362	-4.25362	-4.25362	4.03957	-4.25362	-4.25362	3.38565	-4.25362	3.3199	-4.25362	-4.25362	2.8153	-4.25362	-4.25362	-4.25362	4.53456	2.66248	-4.25362	-0.177578	4.75624	-4.25362	-4.25362	-4.25362	-4.25362
Morc4	0.361324	-1.99855	3.028	6.13471	-1.99855	4.5704	-1.99855	-1.99855	0.754762	6.00537	3.96729	-1.99855	-0.71258	-1.99855	-1.99855	-1.99855	-1.99855	-1.99855	-1.99855	-1.99855	-1.18083	-1.99855	-1.99855	-1.99855	-1.99855	-1.99855	-1.99855	-1.99855	5.21328	-1.99855	-1.99855	-1.99855	-1.99855	-1.99855	-1.99855	-1.99855	-1.99855	-1.99855	-1.99855	-1.99855	-1.99855	-1.99855	-1.99855	-1.99855	-1.99855	-1.99855	-1.99855	-1.99855	-1.99855
Plac1	3.68574	6.35596	6.576	0.696493	6.26216	7.33446	2.08277	0.775645	-2.13152	-2.13152	6.43377	0.246488	-2.13152	3.8897	1.48582	-1.08552	-2.13152	-2.13152	7.21686	-2.13152	-2.13152	-2.13152	7.73874	-2.13152	-2.13152	1.02715	-2.13152	-2.13152	-2.13152	-2.13152	-2.13152	-2.13152	-2.13152	-2.13152	-2.13152	-2.13152	-2.13152	-2.13152	-2.13152	-2.13152	4.71489	-1.27175	-2.13152	-2.13152	-2.13152	-2.13152	-2.13152	-2.13152	-2.13152
Spin2c	-4.69312	-4.69312	-4.69312	6.10019	-4.69312	-4.69312	-2.31976	4.6709	-4.69312	2.68584	1.91638	-4.69312	0.131185	-4.69312	4.56043	-1.0249	-4.69312	4.95866	-4.69312	-4.69312	-4.69312	1.90202	4.49676	-4.69312	-4.69312	3.69086	-4.69312	-4.69312	5.80158	-4.69312	-2.08307	-4.69312	-2.61788	3.51814	4.57947	-3.3532	2.33547	-4.69312	-4.69312	1.37577	6.17123	1.83439	-4.69312	2.52115	-4.69312	4.89697	-1.21415	2.90725	5.07348
Cdx4	-1.52316	-0.0806211	-1.52316	6.7589	-1.52316	-1.52316	-1.52316	-1.52316	-1.52316	6.09547	0.90794	-1.52316	-1.52316	-1.52316	-1.52316	-1.52316	-1.52316	-1.52316	-1.52316	-1.52316	-1.52316	-1.52316	-1.52316	-1.52316	-1.52316	-1.52316	-1.52316	-1.52316	-1.52316	-1.52316	-1.52316	-1.52316	-1.52316	-1.52316	-1.52316	-1.52316	-1.52316	-1.52316	-1.52316	-1.52316	-1.52316	-1.52316	-1.52316	-1.52316	-1.52316	-1.52316	-1.52316	-1.52316	-1.52316
Hand1	-2.1591	-2.1591	-2.1591	5.69867	-2.1591	1.89894	0.214267	-2.1591	-2.1591	5.21986	-2.1591	-2.1591	-2.1591	-2.1591	-2.1591	-2.1591	-2.1591	-2.1591	-2.1591	-2.1591	-2.1591	-2.1591	8.55668	-2.1591	-2.1591	-2.1591	-2.1591	-2.1591	6.53651	-2.1591	-2.1591	-0.0150201	-2.1591	-2.1591	-2.1591	-2.1591	-2.1591	-2.1591	-2.1591	-2.1591	-0.337396	-2.1591	-2.1591	8.51459	-2.1591	-2.1591	-2.1591	4.93672	-2.1591
Car4	-2.91336	-1.03269	-2.29436	4.74072	-3.78256	-3.78256	-3.78256	-3.78256	6.40573	4.104	-3.78256	-3.78256	6.20487	0.860174	5.60271	3.49725	5.02754	4.38392	-3.78256	-3.78256	-3.78256	6.45996	5.43485	1.16311	-3.78256	-3.78256	-3.78256	-3.78256	-3.78256	-3.78256	-3.78256	-1.63849	-3.78256	4.43771	4.83928	4.85825	-3.78256	5.99248	1.58785	6.28561	7.35121	7.55179	-3.78256	-3.78256	3.61815	-3.78256	-3.78256	-3.78256	-3.78256
Mogat2	6.47149	5.62911	5.45977	3.65916	6.86828	4.03063	4.00482	3.77278	5.85674	-4.3527	4.9244	-4.3527	-4.3527	-4.3527	-4.3527	-4.3527	5.14516	4.70984	-4.3527	-4.3527	-4.3527	-4.3527	-4.3527	-4.3527	-4.3527	-4.3527	4.45397	-4.3527	-4.3527	-4.3527	-4.3527	-4.3527	-4.3527	4.13728	-4.3527	-4.3527	-4.3527	-4.3527	-4.3527	-4.3527	-4.3527	2.28516	-4.3527	6.15623	-4.3527	-4.3527	5.73013	-4.3527	-4.3527
Tbx4	-1.18453	-1.18453	-1.18453	5.99348	-1.18453	7.21297	-1.18453	-1.18453	-1.18453	-1.18453	-1.18453	-1.18453	-1.18453	-1.18453	-1.18453	-1.18453	-1.18453	-1.18453	-1.18453	-1.18453	-1.18453	-1.18453	-1.18453	-1.18453	-1.18453	-1.18453	-1.18453	-1.18453	2.37053	-1.18453	-1.18453	-1.18453	-1.18453	-1.18453	-1.18453	-1.18453	-1.18453	-1.18453	-1.18453	-1.18453	-1.18453	-1.18453	-1.18453	-1.18453	-1.18453	-1.18453	-1.18453	-1.18453	-1.18453
Msx1	-2.43923	-2.43923	2.84296	5.2521	-2.43923	1.9938	6.82288	-2.43923	-2.43923	1.02379	6.77523	-2.43923	-2.43923	-2.43923	-2.43923	-2.43923	-2.43923	-2.43923	-2.43923	-2.43923	-2.43923	-2.43923	-2.43923	-2.43923	-2.43923	-2.43923	-2.43923	-2.43923	-2.43923	-2.43923	-2.43923	4.836	-2.43923	-2.43923	4.1239	-0.416773	-2.43923	-0.0780653	-2.43923	-2.43923	-2.43923	-2.43923	2.53369	6.66981	-2.43923	-2.43923	-2.43923	-2.43923	-2.43923
Hoxa9	-0.3123	-1.1815	6.68822	1.81354	-1.1815	7.28483	-1.1815	-1.1815	-1.1815	5.74127	4.78434	-1.1815	-1.1815	0.113262	-1.1815	-1.1815	-1.1815	-1.1815	-1.1815	-1.1815	-1.1815	-1.1815	-1.1815	-1.1815	-1.1815	-1.1815	-1.1815	-1.1815	-1.1815	-1.1815	-1.1815	-1.1815	-1.1815	-1.1815	-1.1815	-1.1815	-1.1815	-1.1815	-1.1815	-1.1815	-1.1815	0.213287	-1.1815	-1.1815	-1.1815	-1.1815	-1.1815	-1.1815	-1.1815
Sall3	4.63696	2.88884	6.6324	6.5288	4.6721	7.25698	5.78564	-2.71198	3.35498	-0.123737	5.78478	-2.71198	-2.71198	-2.71198	-2.71198	-2.71198	6.43053	1.30103	-2.71198	-2.71198	-2.71198	-2.71198	-2.71198	-2.71198	-2.71198	-2.71198	-2.71198	-1.71818	-2.71198	-1.45831	-2.71198	-2.71198	-2.71198	-2.71198	-2.71198	-2.71198	3.83559	-2.71198	-2.71198	-2.71198	-2.71198	-2.71198	-2.71198	-2.71198	-2.71198	-2.71198	-2.71198	-2.71198	1.23946
Lhpp	5.20879	-2.93952	2.74841	2.45155	-2.93952	2.48762	-2.93952	-2.93952	-2.93952	-2.93952	5.64241	-2.93952	-2.93952	-2.93952	-2.93952	-2.93952	-2.93952	-2.93952	7.74562	-2.24633	-2.12179	0.000707149	-1.61719	4.09769	6.78946	-2.93952	5.81802	5.31489	-1.53111	-2.93952	-2.93952	3.82513	-2.93952	-2.93952	6.4544	-2.93952	-2.93952	-2.93952	-2.93952	-2.93952	-2.93952	-2.93952	5.81661	-1.81833	-1.47379	4.95228	-2.93952	-2.93952	-2.93952
Hoxb6	3.8188	-1.43668	6.05304	3.86158	-1.43668	3.33781	-1.43668	-1.43668	-1.43668	2.56702	4.80519	-1.43668	-1.43668	-1.43668	-1.43668	-1.43668	-1.43668	-1.43668	-1.43668	-1.43668	-1.43668	-1.43668	-1.43668	-1.43668	-1.43668	-1.43668	-1.43668	-1.43668	-1.43668	-1.43668	-1.43668	-1.43668	-1.43668	-1.43668	-1.43668	-1.43668	-1.43668	-1.43668	-1.43668	-1.43668	-1.43668	-1.43668	-1.43668	-1.43668	-1.43668	-1.43668	-1.43668	1.78267	-1.43668
Pmp22	-0.161861	4.68043	-4.65326	5.36898	4.017	0.930803	6.13061	3.30125	4.36309	5.26655	-4.65326	6.25646	0.763424	-4.65326	-4.65326	-4.65326	-1.55694	-3.86986	-4.65326	-4.65326	4.5729	6.8745	6.2573	0.513804	7.35035	6.42221	1.20404	-3.65946	-3.24486	5.43945	6.98734	2.37976	5.42482	-4.65326	-4.65326	-4.65326	-4.65326	-3.03553	-4.65326	5.47208	7.17795	-4.65326	3.02598	3.79331	-4.65326	-4.65326	-4.65326	-1.43392	-1.0861
Tbx3	-4.04532	-3.39212	6.39017	5.01636	-4.04532	5.56757	5.2363	1.78535	-4.04532	0.912687	3.22853	-1.66731	6.38406	-4.04532	1.56177	2.97528	1.25908	-4.04532	-4.04532	3.49426	0.437105	-2.35598	-4.04532	-4.04532	-2.03036	2.61927	-4.04532	1.07189	-3.17567	3.36327	0.153002	-4.04532	1.81392	2.94701	-1.79973	-4.04532	-4.04532	1.93351	-4.04532	3.39396	-4.04532	6.42905	2.09787	5.03424	2.87836	1.07511	2.15908	2.23397	-2.55536
Myc	2.01496	6.87008	7.6689	5.50993	4.14906	7.83697	-3.59815	5.24326	5.10693	1.35986	5.58394	-3.59815	-3.59815	-3.59815	-3.59815	-3.59815	6.51188	3.89831	-3.59815	-3.59815	-1.881	-3.59815	-3.59815	-3.59815	-2.58816	0.532866	-3.59815	-3.59815	-3.59815	-3.59815	-3.59815	3.57821	-3.59815	-3.59815	-3.59815	-1.5757	4.78624	-3.59815	-3.59815	-1.98153	-3.59815	-3.59815	-2.41745	-3.59815	-1.42054	-3.59815	-3.59815	-3.59815	-3.59815
Nup62cl	-1.66194	4.53095	6.13352	5.11871	-1.66194	8.37424	-1.66194	-1.66194	-1.66194	-1.66194	7.84159	-1.66194	-1.66194	-1.66194	-1.66194	-1.66194	7.29352	-1.66194	-1.66194	-1.66194	-1.66194	-1.66194	-1.66194	-1.66194	7.26483	-1.66194	4.89197	-1.66194	9.31601	-1.66194	-1.66194	-1.66194	-1.66194	-1.66194	-1.66194	-1.66194	-1.66194	-1.66194	-1.66194	-1.66194	1.44322	5.32073	-1.66194	-1.66194	-1.66194	-1.66194	-1.66194	7.88554	-1.66194
Wnt5a	2.0975	-5.18025	-5.83345	1.50853	-5.83345	0.176679	-2.48306	4.66532	-5.83345	1.20388	2.0085	-5.83345	-4.54748	5.84466	6.55261	1.43644	-5.83345	0.386905	-5.83345	-1.25915	-2.85826	0.340538	-0.174586	-4.00329	-4.82346	3.7307	-5.83345	3.2937	3.05832	4.29895	1.90382	-5.83345	2.33175	2.49082	-5.83345	2.11813	-5.83345	4.41628	3.62871	-2.98551	3.96547	4.78554	0.216264	-5.83345	-5.16684	-5.83345	3.09787	-4.32377	2.90761
Greb1	3.76488	-3.55449	-0.515079	5.18131	-1.99953	3.36806	1.24052	-3.55449	2.16479	4.17053	-0.263767	-3.55449	-0.52022	-3.55449	-3.55449	-3.55449	0.702943	-2.77109	-3.55449	2.44367	-3.55449	3.41826	-3.55449	-3.55449	-3.55449	-3.55449	-3.55449	-3.55449	-3.55449	-3.55449	-3.55449	-2.11618	-3.55449	-3.55449	3.42699	1.90095	4.79757	2.93678	-3.55449	-3.55449	-3.55449	0.862939	3.0307	-2.88762	0.117575	-3.55449	2.92069	2.35526	-2.06453
Hoxc8	-0.918988	-0.918988	4.58029	2.80369	-0.918988	-0.918988	-0.918988	-0.918988	-0.918988	2.54403	-0.918988	-0.918988	-0.918988	-0.918988	-0.918988	-0.918988	-0.918988	-0.918988	-0.918988	-0.918988	-0.918988	-0.918988	-0.918988	-0.918988	-0.918988	-0.918988	-0.918988	-0.918988	-0.918988	-0.918988	-0.918988	-0.918988	-0.918988	-0.918988	-0.918988	0.420932	-0.918988	-0.918988	-0.918988	-0.918988	-0.918988	-0.059216	-0.918988	-0.918988	-0.918988	-0.918988	-0.918988	-0.918988	-0.918988
Hoxa7	-1.12116	-1.12116	7.86843	2.15916	-1.12116	3.60922	-1.12116	-1.12116	-1.12116	3.13808	4.3783	-1.12116	-1.12116	-1.12116	-1.12116	-0.0751511	-1.12116	-1.12116	-1.12116	-1.12116	-1.12116	-1.12116	-0.313515	-1.12116	-1.12116	-1.12116	-1.12116	-1.12116	-1.12116	-1.12116	-1.12116	-1.12116	-1.12116	-1.12116	-1.12116	-1.12116	-1.12116	-1.12116	-1.12116	-1.12116	-1.12116	-1.12116	-1.12116	-1.12116	-1.12116	-1.12116	-1.12116	-1.12116	-1.12116
Tpd52l1	-2.53005	-2.53005	-2.53005	4.81967	-2.53005	-2.53005	0.246914	-2.53005	5.06524	4.75927	1.68502	-2.53005	2.98068	-2.53005	-2.53005	3.39189	3.22127	-2.53005	-2.53005	-2.53005	-2.53005	5.89481	-2.53005	-2.53005	-2.53005	-2.53005	-2.53005	-2.53005	-2.53005	1.81922	-2.53005	1.50473	-2.53005	-2.53005	-2.53005	-2.53005	-2.53005	4.75692	-2.53005	-2.53005	-2.53005	-2.53005	-2.53005	-2.53005	-2.53005	-2.53005	1.88273	-2.53005	2.18823
Elovl1	3.23183	-2.43555	2.68995	-3.87809	6.2184	2.13205	2.17135	4.19958	3.01339	6.22388	4.73655	2.84922	-3.87809	-3.87809	0.144361	-3.87809	0.639305	-3.09468	-3.87809	4.13095	-3.87809	-1.43178	-3.87809	-0.284137	4.5554	5.5951	-3.87809	-2.88428	-3.87809	3.91968	-3.87809	5.68249	-3.87809	7.04958	4.88093	-3.87809	-3.87809	4.57579	2.54667	3.40725	5.62574	-3.87809	-0.883905	-3.87809	5.58505	5.24724	-3.87809	-3.87809	-3.87809
Tmem88	2.9766	2.23037	-3.26181	3.08215	4.42837	2.90256	-0.230778	2.65381	3.32207	4.77759	0.980526	3.8074	1.62404	-1.366	0.877554	4.30475	1.41763	0.804985	-1.14762	-4.04479	-2.96623	-3.02929	2.13454	-4.78668	3.66367	1.70986	3.84786	-3.75741	3.28044	3.58221	4.22145	3.58156	1.39559	3.57065	3.3319	4.93837	1.14943	4.64902	-4.78668	2.84091	-1.47221	3.27287	-4.78668	-3.23416	-4.78668	-3.03292	-4.78668	-3.84277	-4.78668
Krt8	3.20228	-6.2448	-1.03115	0.521596	-6.2448	1.17096	0.304711	-6.2448	3.14943	0.948936	-2.41911	-6.2448	3.81404	5.35937	3.4713	3.54148	2.09609	4.37648	1.15004	-3.40313	-4.52765	2.04994	4.82578	-4.49642	-6.2448	-5.51289	-6.2448	3.18702	4.24905	3.52304	2.76579	3.39213	-0.0174246	4.98592	4.74167	3.09335	1.01044	5.06518	5.72909	-2.39353	4.77829	6.20717	-0.181356	2.57616	3.47499	-3.62625	-6.2448	-6.2448	-0.959952
Oat	1.83563	4.36594	4.70035	4.49002	-3.7496	2.77601	3.22075	-6.03545	3.08133	2.68616	4.66288	2.65253	2.7403	-6.03545	-6.03545	0.546016	4.1579	1.9864	3.14929	-2.29809	-0.956804	2.7401	-6.03545	4.24921	3.82994	1.13189	4.26935	3.91214	-5.1658	3.96668	1.20386	-6.03545	4.06181	2.26352	5.05154	0.876806	-0.0370263	-6.03545	0.523149	2.65553	2.78545	-6.03545	4.17432	-0.658799	-0.0657236	2.49765	-6.03545	-6.03545	-6.03545
Ifitm1	2.06969	0.545202	2.23993	2.75441	-6.14029	2.16243	1.52183	1.23594	3.49699	3.07066	4.21993	2.23761	0.949465	4.94849	2.5349	3.38897	1.10091	0.783801	-6.14029	-6.14029	-6.14029	-6.14029	-6.14029	-6.14029	-6.14029	-6.14029	-6.14029	-6.14029	-6.14029	-6.14029	-6.14029	-6.14029	-6.14029	1.8569	-6.14029	-1.98283	0.804086	2.47452	-6.14029	2.47288	-6.14029	3.16428	-6.14029	3.3765	-6.14029	3.03146	-6.14029	-6.14029	-6.14029
Hoxa10	-0.9808	-0.9808	6.82051	6.25674	-0.9808	5.97086	-0.9808	-0.9808	-0.9808	-0.9808	7.42546	-0.9808	-0.9808	-0.9808	-0.9808	-0.9808	-0.9808	-0.9808	-0.9808	-0.9808	-0.9808	-0.9808	-0.9808	-0.9808	-0.9808	-0.9808	-0.9808	-0.9808	-0.9808	-0.9808	-0.9808	-0.9808	-0.9808	-0.9808	-0.9808	-0.9808	-0.9808	-0.9808	-0.9808	-0.9808	-0.9808	-0.9808	-0.9808	-0.9808	-0.9808	-0.9808	-0.9808	-0.9808	-0.9808
Amot	-0.754391	-6.48447	3.94821	4.35487	-1.14778	3.49396	-6.48447	-1.59663	2.90359	3.51524	4.74146	2.12815	-6.48447	-1.72102	4.11108	-0.417991	-3.83217	1.28424	-6.48447	-6.48447	-0.739737	2.47643	1.4019	-6.48447	-4.4695	-0.16904	0.24277	-4.90777	2.4736	-3.49853	0.980044	3.11161	1.16716	3.08336	2.07435	1.02097	-2.8869	0.763759	-0.314737	1.68673	2.87094	4.18519	-0.922503	-1.73731	1.97832	-6.48447	0.309401	-4.97478	1.00797
NKX2-5
c1run1_05_X_nkx2.5.e8.5	c1run1_07_X_nkx2.5.e8.5	c1run1_10_X_nkx2.5.e8.5	c1run1_22_X_nkx2.5.e8.5	c1run1_24_X_nkx2.5.e8.5	c1run1_38_X_nkx2.5.e8.5	c1run1_42_X_nkx2.5.e8.5	c1run1_45_X_nkx2.5.e8.5	c1run1_54_X_nkx2.5.e8.5	c1run1_60_X_nkx2.5.e8.5	c1run1_74_X_nkx2.5.e8.5	c1run1_75_X_nkx2.5.e8.5	c1run1_76_X_nkx2.5.e8.5	c1run2_09_X_nkx2.5.e7.5	c1run2_17_X_nkx2.5.e7.5	c1run2_19_X_nkx2.5.e7.5	c1run2_26_X_nkx2.5.e7.5	c1run2_27_X_nkx2.5.e7.5	c1run2_28_X_nkx2.5.e7.5	c1run2_33_X_nkx2.5.e7.5	c1run2_36_X_nkx2.5.e7.5	c1run2_39_X_nkx2.5.e7.5	c1run2_41_X_nkx2.5.e7.5	c1run2_43_X_nkx2.5.e7.5	c1run2_44_X_nkx2.5.e7.5	c1run2_46_X_nkx2.5.e7.5	c1run2_49_X_nkx2.5.e7.5	c1run2_51_X_nkx2.5.e7.5	c1run2_53_X_nkx2.5.e7.5	c1run2_61_X_nkx2.5.e7.5	c1run4_06_X_nkx2.5.e7.5	c1run4_13_X_nkx2.5.e7.5	c1run4_14_X_nkx2.5.e7.5	c1run4_23_X_nkx2.5.e7.5	c1run4_25_X_nkx2.5.e7.5	c1run4_26_X_nkx2.5.e7.5	c1run4_28_X_nkx2.5.e7.5	c1run4_32_X_nkx2.5.e7.5	c1run4_35_X_nkx2.5.e7.5	c1run4_44_X_nkx2.5.e7.5	c1run4_57_X_nkx2.5.e7.5	c1run4_61_X_nkx2.5.e7.5	c1run4_81_X_nkx2.5.e7.5	c1run4_86_X_nkx2.5.e7.5	c1run4_93_X_nkx2.5.e7.5	c1run1_01_X_nkx2.5.e8.5	c1run1_02_X_nkx2.5.e8.5	c1run1_08_X_nkx2.5.e8.5	c1run1_11_X_nkx2.5.e8.5	c1run1_16_X_nkx2.5.e8.5
Phlda2	1.46549	9.6323	3.43194	6.50444	7.85932	10.5284	4.6518	9.50073	-3.62021	7.31986	7.82305	7.93363	-3.62021	6.8849	5.46242	5.67741	5.53078	9.17375	5.85493	6.73403	7.90189	5.90226	6.44783	5.48647	7.65562	6.55729	8.57112	8.90062	7.28676	6.68303	8.76584	3.74999	8.32792	8.40578	6.47475	7.62072	8.09453	6.12206	8.45438	8.61346	7.89501	2.29156	4.24702	9.14396	7.69289	-3.62021	-3.62021	-3.62021	-3.62021
Ifitm1	2.11664	2.54536	3.89407	6.26535	4.65821	7.61602	4.74106	5.38707	3.40206	4.89241	6.36194	6.77372	5.68664	1.36906	-0.841024	-0.410928	7.03628	0.95756	1.71445	2.7904	4.62768	1.03847	0.33081	0.172517	4.85397	5.33967	6.67275	4.95748	5.19838	4.18694	7.71988	2.13381	3.71021	6.42512	4.44264	0.620873	4.15689	5.36041	6.8313	5.2548	6.25261	5.57135	4.62003	6.63805	6.02325	-3.08356	-3.08356	-3.08356	-3.08356
Hand1	7.82902	7.13772	6.9609	5.06099	3.48825	5.98413	7.00791	6.49651	-3.8079	-3.8079	5.06493	4.42832	-3.8079	4.79045	2.56905	4.04272	4.95726	6.04858	5.71404	6.82389	4.78623	12.2769	6.17317	5.63651	7.30292	5.13267	4.95414	5.43515	-0.00108539	-3.40266	4.24726	2.6581	6.90862	5.02106	6.43831	6.36007	6.54201	-0.293815	3.09923	6.83101	6.10404	-1.89467	0.93373	7.66997	2.81677	5.89689	-3.8079	-2.89402	-3.8079
Zc3hav1	5.44794	4.44572	-1.64097	3.40032	-2.60772	-2.60772	6.31137	-2.60772	-2.60772	-2.60772	-2.60772	3.1181	-2.60772	5.48319	5.62804	5.92858	5.30084	5.4265	4.97789	4.7442	6.47865	5.293	4.37644	4.99876	9.22698	9.5885	7.5264	6.80806	-1.42644	9.25065	-2.03954	8.31894	6.83531	7.19069	8.41272	8.03435	7.3052	8.41696	-2.60772	6.45229	7.44853	8.44974	7.61586	7.99997	7.35182	4.36987	-2.60772	-2.60772	-2.60772
Car4	4.76366	5.38785	6.50372	3.84911	6.10377	3.24498	6.35519	4.37208	-4.53558	5.40151	-1.76958	-3.38391	-4.53558	2.18526	4.59105	5.71865	4.89317	4.83609	5.29865	5.9141	4.92642	4.09721	4.29446	3.97996	6.46696	4.52467	5.26354	3.68072	0.167	4.07356	4.1347	4.36768	6.69752	7.13689	7.07919	7.06714	8.0507	5.56448	3.55357	7.66121	5.2784	4.44314	3.9907	7.24581	5.39228	6.05594	2.40923	-4.53558	5.93201
Spin2c	4.53476	5.69329	5.69696	6.9206	5.24132	5.94329	5.73281	6.01275	1.37385	1.30421	6.52678	6.59602	-3.06434	5.99088	4.479	5.83795	5.18315	5.23368	5.24389	5.33543	5.43435	5.3573	5.58296	5.3526	6.16943	4.2586	4.81026	3.03189	-4.8949	-2.8098	-0.299909	0.862342	6.86799	-2.2528	7.52507	6.8553	6.46021	1.52633	1.90675	6.28634	6.25377	4.10269	-1.34272	6.60865	2.88299	2.49486	-4.8949	2.2505	2.94652
Morc4	5.34779	5.94145	4.43732	0.444639	7.22252	3.94623	3.60586	5.60504	-2.73425	-2.73425	7.07425	6.36465	-2.73425	2.68503	8.22452	8.08107	7.01512	7.32401	7.22184	7.1192	2.7315	5.48719	4.8674	5.03192	6.40571	1.31339	5.42544	0.488995	-1.77016	2.19704	0.973532	6.33469	4.92573	3.55984	5.94234	4.9121	5.46038	0.0447742	0.324575	6.87686	5.15899	4.13167	-0.785112	5.72162	1.94416	-2.73425	-1.85918	-2.73425	-1.73629
Car2	-2.56204	2.19911	-2.56204	-2.56204	-2.56204	-2.56204	0.917083	-2.56204	5.91365	-2.56204	-2.56204	-2.56204	-2.56204	3.65008	7.80059	7.95953	8.79234	6.60927	6.61192	6.99276	7.39869	6.34802	6.13997	6.46014	6.08305	6.1508	5.13137	7.32492	7.25608	6.75376	6.85572	6.53276	5.74231	4.35674	-0.0486041	4.77093	-1.87194	7.71284	5.55083	8.77397	5.06742	9.41002	9.31539	5.53488	7.17481	4.82773	-2.56204	-1.64816	-2.56204
Foxf1	6.12631	5.83629	6.60072	6.58014	5.2682	5.87794	6.08884	5.54657	-3.08863	-3.08863	4.09456	5.10608	-3.08863	2.33066	-1.56952	2.23241	3.70722	5.29639	4.52195	7.82886	2.66802	4.70945	3.52044	4.4966	4.74686	2.08878	5.62107	6.00429	-0.564016	-2.68339	5.78832	3.05952	4.81557	5.96254	5.81065	6.94394	4.57533	1.70388	4.06131	6.21448	5.29953	3.15352	3.87436	5.94365	2.2251	2.32672	-3.08863	-2.17474	-3.08863
Stard8	6.61373	-1.70023	7.1358	2.19866	5.24649	-3.21903	7.2925	-3.21903	3.66558	7.35358	-3.21903	-3.21903	-0.733052	2.20025	6.24531	6.08013	5.64123	5.38564	5.56286	5.63834	-0.753055	4.40993	4.81365	4.63865	6.87233	7.21587	4.33132	3.16256	-2.51072	3.89814	2.47247	1.22174	7.62084	3.43354	7.02438	7.42168	7.64837	6.56435	1.2319	4.29488	7.27454	-1.80766	3.20938	7.41547	1.02093	-3.21903	-3.21903	-2.30515	-3.21903
Pmp22	6.90803	6.39899	7.58541	5.92137	6.6383	5.07132	7.04473	7.29722	-4.96432	3.72177	5.02799	6.10621	-4.96432	1.89278	5.57151	4.49214	4.17046	3.75652	3.86087	4.0021	-4.46723	3.15439	3.12063	2.85745	6.85492	2.21961	4.70666	-1.36518	2.2082	3.33009	2.50858	0.924848	4.06165	4.29589	6.54135	7.51757	7.47739	-1.82378	0.292267	6.17465	6.44435	2.22516	2.8304	6.52146	1.89152	-4.96432	-4.46143	-2.30791	-4.96432
Polg	3.72646	5.16795	5.74459	-1.29749	-3.4553	4.34668	2.49519	3.95101	-2.58708	-3.41201	3.05853	5.55633	0.90317	2.50762	4.45887	3.31989	3.21218	10.1469	3.39135	4.6537	2.96591	3.38461	3.33352	2.29287	5.64347	5.02561	4.81231	2.25209	-0.60544	5.03175	-0.673178	4.97185	5.02055	6.37618	5.0639	2.07034	4.67391	3.93165	4.04373	5.20324	5.06364	5.5055	4.82511	7.53519	4.18178	1.80977	1.47524	-0.114877	2.61224
Rspo3	-2.61486	0.837933	-2.61486	0.564036	-2.61486	2.93292	-2.61486	-2.61486	-2.61486	-2.61486	-1.82803	3.22306	-2.61486	2.80443	6.67552	6.00021	5.87241	5.24895	5.04438	4.58157	3.07438	5.23546	4.71084	4.99163	3.72638	7.74478	5.91585	6.06056	6.37774	8.90141	5.76481	7.32067	1.16777	3.64675	3.95797	4.4769	3.08313	6.82444	4.31914	0.350456	4.72802	7.70234	4.21838	0.764561	7.43676	-2.61486	-2.61486	4.73203	3.92026
Krt8	6.01706	5.15087	4.7744	4.59551	4.70068	4.47976	5.88258	5.2942	2.33091	3.29017	2.99952	2.95268	-6.11902	3.20574	1.76443	2.48942	7.34474	4.55442	3.81252	4.63493	2.87814	2.77109	4.06738	3.06748	5.01418	4.61085	3.02367	0.718039	-1.72894	1.61099	-0.00936597	-0.690008	4.59838	2.84754	5.49195	4.8331	5.29389	2.88007	0.355354	5.65223	4.86231	-2.66492	1.92249	5.5205	2.43461	0.279316	2.2296	-1.20372	4.03846
Msx1	5.64359	4.16614	5.35473	1.24378	4.86814	5.74302	2.28526	4.30395	4.71282	2.20952	4.9845	2.96917	-3.9896	2.41273	4.99013	4.59296	4.23714	4.10027	4.7016	4.69233	3.53118	2.86695	3.24648	4.28157	4.93962	5.20386	3.73191	-3.1756	0.525737	-3.58436	0.661896	1.20449	1.71218	4.16061	5.59372	3.37005	4.64208	-0.247665	3.14883	6.54057	4.01259	-0.860936	2.76935	4.85536	2.39869	-3.9896	-3.9896	-3.9896	-2.99164
Dnmt3b	0.939262	1.39873	0.137205	1.6752	-0.369889	2.56578	-2.84718	3.08287	0.30969	5.24139	4.44679	-0.318996	1.75991	3.9041	3.3205	3.76564	3.47373	4.7155	6.08385	4.17602	2.48172	7.02005	2.56808	6.86971	4.83858	2.51278	3.51331	5.50689	2.6377	3.55453	4.2642	-1.33627	3.81442	4.57974	5.3958	0.537268	3.3344	3.45443	1.44855	3.72687	2.50089	0.585987	5.20434	3.15813	2.9408	4.54131	-4.84199	-1.30478	-3.84403
Gata2	-2.12966	-2.12966	-2.12966	-2.12966	2.60673	2.05359	-2.12966	4.81163	-0.128169	-2.12966	7.33231	5.60897	-2.12966	3.28963	8.19778	7.259	7.48593	6.87311	6.57319	6.12771	-0.96997	6.62462	6.80378	6.48366	-0.922728	6.60346	1.5942	-2.12966	1.64411	7.36281	4.89125	9.21592	2.01511	-1.46746	-1.29377	2.56099	0.575329	7.24314	1.27487	-0.499549	4.9875	7.60876	8.42353	-0.501894	7.96489	-2.12966	-2.12966	1.61208	-2.12966
Cfc1	-2.41895	1.78359	-2.41895	-2.41895	5.80962	0.841599	-2.41895	-0.227489	1.10643	4.80113	-1.12585	-2.41895	-2.41895	3.57402	6.48412	6.62867	5.53959	5.32278	5.85447	6.28414	6.43708	4.4878	5.10909	4.42717	5.83041	3.98409	5.13765	5.75884	-1.71064	-1.21906	6.1741	-2.41895	3.5992	5.31988	6.14246	7.26616	4.34052	1.25096	5.30488	6.72227	5.9481	-0.30798	1.87379	6.59595	1.27372	-2.41895	-2.41895	3.79791	-2.41895
Greb1l	-0.0769961	3.79809	-3.20028	2.28973	3.02124	1.28892	3.66075	-3.20028	3.65967	2.46605	-0.0338842	2.69799	-1.00511	7.45258	6.49268	6.92362	6.57721	5.81212	5.98202	4.54759	1.71653	5.42503	3.98881	5.46463	4.66627	3.32231	5.60965	-2.61015	0.978836	-1.35451	3.2885	1.36407	5.14819	5.80747	5.11317	4.9639	3.17814	2.30132	3.63026	4.10011	4.18519	-2.12536	2.96605	4.38668	-0.747728	-3.20028	-3.20028	-3.20028	-3.20028
Sall3	2.7361	2.56722	-2.62043	0.157566	-0.500601	7.08278	-2.62043	1.82658	-2.62043	-2.62043	6.80396	6.31708	-0.789872	-2.62043	0.988001	0.662874	4.86234	4.82685	5.60532	4.576	3.98942	5.87149	4.05832	4.6554	3.77114	5.80471	5.84863	6.33971	4.51679	4.9176	-1.64568	-0.537359	4.5915	1.79824	0.243448	2.56368	4.69476	6.38819	5.62169	0.344881	2.66887	7.14942	1.61866	5.54637	4.26301	-2.62043	-2.62043	-2.62043	-2.62043
Frmd6	-0.872019	-3.43486	4.29258	4.52673	3.74401	-3.43486	6.10511	-1.6785	-0.848244	2.33507	3.39064	3.46608	-3.43486	2.96747	4.88756	5.04825	4.664	4.08174	4.31704	5.0534	-1.08051	4.38957	3.93363	3.99204	2.68539	4.53911	4.46936	3.93365	5.31062	4.04931	3.84095	-0.807411	2.06264	4.72713	4.36697	5.3598	4.70748	3.29168	2.88653	1.53704	5.43549	-2.79952	-1.24052	4.25792	2.92751	-3.43486	-3.43486	-1.56605	-3.43486
S100a10	3.91039	2.73654	3.76356	2.38733	3.65286	3.69852	4.11027	3.33991	2.24421	-3.05041	-0.72214	0.502361	2.23732	-1.34925	-1.05246	2.86622	3.19875	2.71645	2.9298	3.50123	4.25673	2.48306	2.17189	2.46167	4.5983	2.58957	3.22183	2.55634	2.80728	3.16034	-0.82672	3.03608	3.40177	4.00993	3.96748	3.48896	4.56126	3.63078	2.44092	3.1015	2.01328	2.4588	2.63571	4.0891	3.68565	2.1113	-0.310425	1.52785	1.53906
Trim6	3.87614	-1.13195	-1.82959	7.19145	-0.137628	-1.82959	4.73645	3.19342	3.05498	8.16211	1.08258	6.66545	-1.82959	-1.82959	6.82225	12.4759	5.39176	5.28358	5.44849	2.91434	-1.82959	6.07114	5.62089	5.36433	2.81863	-0.329853	-0.435418	6.02501	4.45614	8.53384	-1.82959	0.458624	2.46704	2.18341	6.67371	-1.82959	4.53815	-1.82959	0.302805	1.47861	-1.82959	-1.82959	3.555	2.31794	4.36669	-1.82959	-1.82959	1.18349	-1.82959
Aplnr	7.19964	-0.572507	3.92356	4.82758	-1.73838	-1.73838	5.71089	-1.73838	-1.73838	-1.73838	5.00161	-1.73838	4.93031	-1.73838	-1.73838	-1.73838	1.13986	-1.73838	-1.73838	0.274115	6.76382	1.99597	4.14354	0.206955	-1.73838	4.14515	5.26177	4.7157	-0.774284	2.16323	1.79996	5.62049	6.02951	6.6335	5.27228	6.17882	3.65728	6.92557	3.45289	4.81995	6.10481	4.13306	6.28377	7.17698	4.88629	-1.73838	-1.73838	-0.824495	-1.73838
Xaf1	6.14565	5.27198	-2.70302	0.951585	-0.58319	4.3006	-2.02754	1.28479	0.386197	1.61208	-1.9162	-2.70302	-2.10718	4.49934	3.85627	3.47152	3.0502	2.21379	3.75907	3.37945	3.77982	3.16593	2.77199	2.74882	0.108229	0.502619	7.18307	2.97747	7.21915	2.415	4.79707	2.78961	2.94328	6.71538	1.60725	7.83779	3.25905	1.87011	2.07894	4.47223	1.25986	1.72138	0.243728	1.44451	4.78247	-2.70302	-2.70302	-2.70302	-1.70506
Igsf11	4.81502	6.14785	5.14266	5.03411	4.02271	3.01104	5.92067	4.89411	2.52752	4.1111	2.51647	1.78091	2.08285	1.74938	0.0188864	-0.578924	1.76763	4.0681	4.18349	3.27892	-2.70323	0.789597	1.25027	2.03345	4.63609	-1.2035	2.21852	-1.89964	-2.70323	1.94055	1.33634	2.24075	4.2927	4.68056	4.62183	3.35087	3.88287	-0.407724	-0.240501	2.61017	3.52133	3.73576	1.73941	0.814259	1.41812	-2.70323	-2.70323	-0.834416	1.10033
Fgf15	-1.50988	-1.50988	-1.50988	-1.50988	-1.50988	0.439152	-1.50988	-1.50988	-1.50988	-1.50988	-1.50988	-1.50988	-1.50988	3.50556	7.28551	7.82144	7.31255	6.93376	8.08072	7.73978	-1.01279	6.79694	6.55933	5.4397	3.9434	-0.573327	5.68218	5.24014	5.02301	4.82823	0.908008	7.46459	9.63436	-0.847686	-1.50988	8.46525	6.93381	-1.50988	-1.50988	1.1313	2.90079	4.50338	1.2392	6.65182	3.32749	-1.50988	-1.50988	-1.50988	-1.50988
Tmem88	4.7523	1.73675	1.14873	3.75468	4.93609	4.16131	4.34172	3.25725	-4.41619	5.36211	3.49976	2.18005	-1.16972	1.1723	1.20136	1.066	1.67109	1.99989	2.49323	3.14379	1.70342	0.281344	2.41065	1.29709	3.93339	2.26441	3.97751	3.46414	-1.06859	2.6584	0.759888	-2.05888	4.85587	4.88619	3.51889	4.60248	4.98588	3.56574	0.321441	4.96801	4.5436	1.89172	0.171465	5.86394	2.24389	1.35852	0.929006	-0.353041	0.0141002
Gata3	-2.35076	3.80443	-2.35076	4.76363	6.65511	3.85791	3.54451	4.97438	4.03491	4.79423	3.02829	3.08051	-2.35076	-2.35076	1.01811	-0.226449	2.58683	4.52979	3.8733	3.76367	-2.35076	3.17699	2.30198	2.5325	4.06755	4.48631	2.17174	1.94932	-0.528816	3.94403	1.2463	3.20281	4.08233	2.18123	2.35626	2.64211	2.42408	-2.35076	3.88684	4.38114	2.52583	-0.239785	1.44382	4.13852	6.22382	-2.35076	-2.35076	-2.35076	-2.35076
Pwwp2b	-1.5213	-1.5213	-0.554554	-1.5213	5.62386	-1.5213	-1.5213	-1.5213	-1.5213	-1.5213	7.61033	-1.5213	-1.5213	7.11543	5.71031	6.01105	11.7286	5.86802	5.9599	6.2568	-1.02421	6.36698	5.80439	4.26461	4.48022	7.38257	0.568446	5.8691	-1.5213	-0.540973	0.0299013	-1.5213	3.31096	3.08156	1.49031	0.941665	5.49898	3.23688	1.88322	6.01313	3.47005	0.162713	2.11628	6.03394	0.173317	-1.5213	-1.5213	0.347511	-1.5213
Actc1	1.58182	-3.01112	1.91488	-0.192281	4.3405	-1.805	-6.17423	-2.33871	2.41616	-0.880434	1.397	-0.474959	-1.69128	-7.30796	-7.30796	-7.30796	-5.66757	-7.30796	-2.19844	-7.30796	-5.51378	-5.69843	-7.30796	-5.36263	-7.30796	-6.76498	-7.30796	-6.71783	-1.67882	-7.30796	-6.73978	-5.46411	-7.30796	-7.30796	0.125889	-7.30796	-7.30796	-7.30796	-7.30796	-1.02247	-7.30796	-7.30796	-7.30796	-7.30796	-7.30796	8.43952	8.47785	7.51138	8.46808
Ttn	-3.73146	1.99245	1.6518	-2.11959	-1.70176	-1.4458	-5.37376	-4.18764	-2.85288	3.71309	-3.37527	-4.1548	-3.36584	-6.85474	-6.85474	-6.85474	-5.21435	-6.85474	-3.90899	-6.85474	-5.24271	-5.24521	-6.85474	-4.90941	-6.85474	-5.60929	-4.51249	-6.52971	-5.67346	-6.13349	-6.85474	-6.85474	0.0961063	-6.85474	-5.10847	-6.85474	-6.85474	-6.85474	-6.85474	-6.85474	-2.96889	-6.85474	-6.85474	-6.85474	-3.7747	6.92738	8.03559	7.94394	6.84907
Myl4	-5.43804	-1.75828	-1.91464	-1.47018	-4.35706	-3.0343	-5.43804	-3.24658	-4.43705	-5.43804	-3.47416	-1.52637	-1.08533	-5.43804	-5.43804	-5.43804	-3.79765	-5.43804	-3.31624	-4.10611	-5.43804	-3.82851	-5.43804	-5.43804	-2.68161	-5.43804	-5.43804	-5.43804	-5.04085	-2.47264	-5.43804	-5.43804	-5.43804	1.29573	-5.43804	-5.43804	-1.40817	-4.23447	-5.43804	-5.43804	-0.410381	-2.99804	-4.65953	-0.98496	-1.92216	6.88589	7.05027	6.46111	7.02191
Acta2	5.53155	0.88462	4.33253	0.4731	4.78559	-1.80686	5.9273	1.1538	3.61998	1.82027	-5.90812	2.17882	2.32036	-6.69495	-5.17584	-6.69495	-5.05456	-6.69495	-6.69495	-6.69495	-5.82885	-6.69495	-6.69495	-4.74962	-1.32686	-6.15197	-1.85286	-6.69495	-5.98664	-6.69495	-6.69495	-6.69495	1.8821	-6.69495	5.17834	0.741889	2.85216	-6.69495	-6.04964	-6.69495	-6.69495	-6.05961	-6.69495	-6.69495	-5.89119	7.34448	7.31246	6.75842	7.0178
Tnnt2	1.73375	-1.76396	-2.33345	0.115143	-5.44372	-4.16242	-5.44372	-5.44372	-3.85744	-3.91237	-4.15062	0.806777	0.0308659	-5.44372	-5.44372	-5.44372	-5.44372	-5.44372	-2.49797	-4.11179	-5.44372	-5.44372	-5.44372	-5.44372	1.74329	-5.44372	-0.410159	-5.44372	-5.04653	-5.44372	-5.44372	-4.24533	-1.6611	-1.65558	-5.44372	-1.65836	0.0136544	-5.44372	-5.44372	-5.44372	0.467613	-5.44372	-5.44372	-3.81596	-5.44372	8.35536	7.14656	6.45041	6.9237
Myh6	-3.06144	0.600727	1.11581	-3.20705	-0.304033	0.423875	-5.38657	-3.01856	-3.28913	-2.01474	-1.70603	-3.66817	-3.9494	-5.38657	-5.38657	-5.38657	-3.74618	-5.38657	-1.53762	-5.38657	-5.38657	-5.38657	-5.38657	-5.38657	-5.38657	-5.38657	-5.38657	-5.38657	-5.38657	-5.38657	-5.38657	-5.38657	-5.38657	-5.38657	-5.38657	-5.38657	-5.38657	-5.38657	-5.38657	-5.38657	-5.38657	-5.38657	-5.38657	-5.38657	-5.38657	7.41135	8.0412	6.57135	6.87878
Pgam2	-3.88366	-3.88366	-3.88366	-3.88366	-3.88366	-3.88366	-3.88366	-3.88366	-3.88366	-3.88366	-3.88366	-3.88366	-3.88366	-3.88366	-3.88366	-3.88366	-3.88366	-3.88366	-3.88366	-3.88366	-3.38657	-3.88366	-3.88366	-3.88366	-3.88366	0.606777	-3.88366	-3.88366	-3.88366	-3.88366	-3.88366	-3.88366	-3.88366	0.229854	-3.88366	-3.88366	-3.88366	-3.88366	-3.88366	-3.88366	-3.88366	-3.88366	-3.88366	-3.88366	-3.88366	6.9901	6.17228	5.53879	7.79218
Tnnc1	-4.00843	-4.77502	1.26721	1.25728	0.507647	-4.77502	-2.10279	-4.77502	-4.77502	-4.77502	-4.77502	-4.77502	-0.700187	-4.77502	-4.77502	-4.77502	-4.77502	-4.77502	-4.77502	-4.77502	-4.77502	-4.77502	-4.77502	-4.77502	-4.77502	-4.23204	-4.77502	-4.77502	-4.77502	-4.77502	-4.77502	-4.77502	-0.630251	-4.77502	-1.19132	1.88389	2.27895	-4.77502	-4.77502	-0.711928	-0.112664	-4.77502	-3.12146	-1.25753	-4.77502	7.6398	6.98294	6.85065	7.70647
Ankrd1	-3.36575	-0.694602	0.391917	-2.40938	-0.311021	-0.236036	-4.63028	-4.63028	-2.82151	-3.09893	3.8053	-4.63028	-2.60593	-4.63028	-4.63028	-4.63028	-4.63028	-4.63028	-4.63028	-4.63028	-3.47059	-4.63028	-4.63028	-4.63028	-4.63028	-4.63028	-4.63028	-4.63028	-4.63028	-4.63028	-4.63028	-4.63028	-4.63028	-4.63028	-4.63028	-1.30447	-4.63028	-4.63028	-4.63028	-4.63028	-4.63028	-4.63028	-4.63028	-4.63028	-3.82653	8.21048	5.1472	7.81478	8.06499
Mybpc3	-2.6838	-2.78246	-0.0113135	-1.51691	-3.94833	-3.94833	-3.94833	-3.94833	-3.94833	-3.94833	-3.1615	-3.94833	2.46738	-3.94833	-3.94833	-3.94833	-2.30794	-2.50575	-3.94833	-3.94833	-3.94833	-3.94833	-3.94833	-3.94833	-3.94833	-3.94833	-3.94833	-3.94833	-3.94833	-3.54309	-3.94833	-3.94833	-3.94833	-3.94833	-3.94833	-3.94833	-3.94833	-3.94833	-3.94833	-3.94833	-3.94833	-3.94833	-3.94833	-3.94833	-3.94833	5.24263	5.50284	3.14198	7.21564
Unc45b	-3.71345	-3.01581	-3.71345	-0.656215	-2.02149	-3.71345	-3.71345	-3.71345	-3.71345	-1.4561	-3.71345	-3.71345	-3.71345	-3.71345	-3.71345	-3.71345	-3.71345	-3.71345	-3.71345	-3.71345	-3.71345	-3.71345	-3.71345	-3.71345	-3.71345	-3.71345	-3.71345	-3.71345	-3.71345	-3.71345	-3.71345	-3.71345	-3.71345	-3.71345	-3.71345	-3.71345	-3.71345	-3.71345	-3.71345	-3.71345	-3.71345	-3.71345	-3.71345	-3.71345	-3.71345	6.06165	4.60596	6.5744	7.13854
Myh7	-4.29918	-0.916047	2.85819	-2.56411	-0.485424	-2.66553	-4.29918	-2.8221	-2.40048	0.485783	0.854449	-3.48067	0.275947	-4.29918	-4.29918	-4.29918	-4.29918	-4.29918	-4.29918	-4.29918	-3.80209	-4.29918	-4.29918	-4.29918	-4.29918	-4.29918	-4.29918	-4.29918	-3.90198	-4.29918	-4.29918	-4.29918	-4.29918	-4.29918	-4.29918	-4.29918	-4.29918	-4.29918	-4.29918	-4.29918	-4.29918	-4.29918	-4.29918	-4.29918	-4.29918	8.55228	8.84312	7.21772	9.43189
Csrp3	-3.61101	-3.61101	-3.61101	-3.61101	-2.53003	-3.61101	-3.61101	-2.13393	-3.61101	-3.61101	-3.61101	-3.61101	-3.61101	-3.61101	-3.61101	-3.61101	-3.61101	-3.61101	-3.61101	-3.61101	-3.61101	-3.61101	-3.61101	-3.61101	-3.27565	-3.61101	-3.61101	-3.61101	-3.61101	-3.61101	-3.61101	-3.61101	-3.61101	-3.61101	-1.31094	-3.61101	-3.61101	-3.61101	-3.61101	-3.61101	-3.61101	-3.61101	-3.61101	-3.61101	-3.61101	5.77229	8.05607	5.82071	6.71695
Sh3bgr	-4.26009	-0.0575479	-0.861695	-0.434025	2.53993	-2.97879	-4.26009	-4.26009	-4.26009	-4.26009	-4.26009	-4.26009	-1.77411	-4.26009	-4.26009	-1.92898	-1.8719	-0.556719	-1.31434	-0.54429	-3.763	0.0226244	-0.306585	-1.00402	-3.65281	-4.26009	-4.26009	-3.93506	-4.26009	-4.26009	-4.26009	-4.26009	-4.26009	-4.26009	-0.584901	-4.26009	-4.26009	-4.26009	-4.26009	-4.26009	-0.224081	-4.26009	0.182555	-4.26009	-2.26639	7.44341	7.22103	5.56239	7.25497
Myl7	-2.32282	-1.74416	-3.14941	-2.48794	-4.14514	-4.00084	-4.66754	-8.29344	-7.70781	-1.12299	-1.44052	-3.23272	-0.729847	-0.44257	-2.05226	-1.58627	-1.98332	-2.06699	-2.20496	-2.38227	2.73295	-3.30372	-1.61469	-2.58407	0.198583	0.0386192	-1.53225	-1.18798	-6.4715	-7.57219	-0.0657586	-1.30932	-2.92713	1.40737	-1.43062	-2.78937	0.630126	-0.646898	-0.698374	2.45189	1.99096	-6.00859	-1.87706	-1.96372	0.881799	6.27511	6.29616	5.98316	6.39618
Myl3	-3.6277	-2.46183	-0.877822	-1.95092	-3.6277	-3.6277	-3.6277	-3.6277	-3.04207	-2.45114	-3.6277	1.2652	-3.6277	-3.6277	-3.6277	-3.6277	-3.6277	-3.6277	-3.6277	-3.6277	-3.6277	-3.6277	-3.6277	-3.6277	-3.6277	-3.6277	-3.6277	-3.30266	-3.6277	-3.6277	-3.6277	-3.6277	-3.6277	-3.6277	-3.6277	-3.6277	-3.6277	-3.6277	-3.6277	-3.6277	-3.6277	-3.6277	-3.6277	-3.6277	-3.6277	9.08457	9.37023	-1.44614	8.83174
Myl1	-3.62693	-3.62693	3.86074	-3.62693	-3.62693	-2.34563	-3.62693	-3.62693	-3.62693	-2.09558	-3.62693	-3.62693	-3.62693	-3.62693	-3.62693	-3.62693	-3.62693	-3.62693	-3.62693	-3.62693	4.1453	-3.62693	-3.62693	-3.62693	-3.62693	-3.62693	-0.434442	-3.62693	-1.94049	-3.62693	-3.05875	-3.62693	-3.62693	-3.62693	-3.62693	-3.62693	-3.62693	-3.62693	-3.62693	-3.62693	-3.62693	-3.62693	-3.62693	-3.62693	-3.62693	6.51037	6.55089	7.56285	7.27513
Myocd	-3.68438	-2.98675	-3.68438	2.00307	5.61512	-3.68438	-3.68438	-3.68438	-3.68438	-3.68438	-3.68438	-3.68438	-3.68438	-3.68438	-3.68438	-3.68438	-3.68438	-3.68438	-3.68438	-3.68438	5.4107	-3.68438	-3.68438	-3.68438	-3.68438	-3.68438	-3.68438	-3.68438	-3.68438	-3.68438	-3.68438	-3.68438	-3.68438	-3.68438	0.506962	-3.68438	-3.68438	-3.68438	-3.68438	-3.68438	5.36883	-3.68438	-3.68438	-3.68438	-3.68438	6.65207	6.24646	6.76466	4.43567
Cnn1	-3.61294	-2.91531	-3.61294	-3.61294	-3.61294	-3.61294	-3.61294	-3.61294	3.56894	-3.61294	-3.61294	-3.61294	-3.61294	-3.61294	-3.61294	-3.61294	-3.61294	-3.61294	-3.61294	-3.61294	-3.61294	-3.61294	-3.61294	-3.61294	-3.61294	-3.61294	1.79725	1.45734	-3.61294	-3.61294	-3.61294	-3.61294	-3.61294	4.21734	0.148281	2.37431	-1.82485	-3.61294	-3.61294	0.494671	2.4284	-3.61294	-3.61294	-2.58072	-3.61294	6.2292	6.71473	6.17244	6.78172
Nebl	4.07018	-2.91495	2.6395	-1.61463	2.07203	-2.85854	-3.08443	-4.12949	-3.71438	-1.87467	-3.67597	-5.19802	-4.54441	-5.88585	-5.88585	-5.88585	-5.88585	-5.88585	-5.88585	-5.88585	-5.88585	-5.88585	-5.88585	-5.88585	-5.88585	-5.88585	-5.88585	-5.88585	-5.88585	-5.88585	-5.88585	-5.88585	-5.88585	-0.765484	-5.88585	1.00107	-1.85598	-5.88585	-5.88585	-2.30081	1.62034	-5.88585	-4.60447	-4.85363	-5.88585	5.25081	6.7455	5.63477	6.21007
Tnni1	0.483853	0.0461659	-0.112371	0.79598	-2.42569	-3.74791	-0.577161	-6.71215	-7.38536	-1.71903	-0.878613	-4.68542	-3.40085	-7.38536	-7.38536	-7.38536	-7.38536	-7.38536	-4.43961	-6.05343	-0.110628	-7.38536	-7.38536	-7.38536	-0.754043	-7.38536	-3.75326	-7.38536	-7.38536	-7.38536	0.0152101	-5.54151	-5.81811	-0.827728	-1.89486	-7.38536	2.62517	-7.38536	-3.4158	-7.38536	1.2075	-7.38536	-7.38536	-7.38536	-7.38536	5.80328	6.00053	5.47038	6.39591
Slc8a1	-2.99484	-1.47604	-2.99484	-2.99484	-2.99484	-1.0458	-2.99484	-2.99484	-2.40921	-2.99484	-2.20801	-2.30701	-2.399	-2.99484	-2.99484	-2.99484	-2.99484	-2.99484	-2.99484	-2.99484	-2.99484	-2.99484	-2.99484	-2.99484	-2.99484	-2.99484	-2.99484	-2.99484	-2.99484	-2.99484	-2.99484	-2.99484	-2.99484	-2.99484	-2.99484	-2.99484	-2.99484	-2.99484	-2.99484	-2.99484	-2.99484	-2.99484	-2.99484	-2.99484	-2.99484	2.42051	6.37591	5.84184	6.14574
Actn2	-3.19532	-2.49769	-3.19532	-3.19532	2.24391	-1.91402	-3.19532	-3.19532	-2.19433	-3.19532	-3.19532	1.2489	-3.19532	-3.19532	-3.19532	-3.19532	-3.19532	-3.19532	-3.19532	-3.19532	-3.19532	-3.19532	-3.19532	-3.19532	-3.19532	-3.19532	-3.19532	-3.19532	-3.19532	-3.19532	-3.19532	-3.19532	-3.19532	-3.19532	-3.19532	-3.19532	-3.19532	-3.19532	-3.19532	-3.19532	-3.19532	-3.19532	-3.19532	-3.19532	-3.19532	6.18798	7.30303	6.3014	8.59542
Hspb2	4.40928	3.22997	0.977611	-3.28047	-3.28047	-3.28047	-3.28047	2.15307	-3.28047	-3.28047	-3.28047	-3.28047	-2.26419	-3.28047	-3.28047	-3.28047	-3.28047	-3.28047	-3.28047	-3.28047	-3.28047	-3.28047	-3.28047	-3.28047	-3.28047	-3.28047	-3.28047	-3.28047	-3.28047	-3.28047	-3.28047	-3.28047	-3.28047	-3.28047	-3.28047	1.13304	2.81699	-3.28047	-3.28047	-3.28047	-3.28047	-3.28047	-0.131703	0.867057	-3.28047	7.14611	7.21747	6.98075	7.47783
Myom1	-1.91481	3.17539	-1.63888	-1.50257	-3.17934	-3.17934	-3.17934	-3.17934	-2.59371	-2.00278	-0.267176	-2.49151	-3.17934	-3.17934	-3.17934	-3.17934	-3.17934	-1.73676	-3.17934	-3.17934	-3.17934	-3.17934	-3.17934	-3.17934	-3.17934	-3.17934	-3.17934	-3.17934	-3.17934	-3.17934	-3.17934	-3.17934	-3.17934	-3.17934	-3.17934	-3.17934	-3.17934	-3.17934	-3.17934	-3.17934	-3.17934	-3.17934	-3.17934	-3.17934	-3.17934	5.01409	6.52287	3.80415	5.02116
Ldb3	-1.65053	-3.57841	-1.31006	-2.78566	2.55415	-3.57841	-3.57841	-3.57841	-1.99213	-3.57841	0.784925	-2.89058	-2.98258	-3.57841	-3.57841	-3.57841	-3.57841	-3.57841	-3.57841	-3.57841	-3.57841	-3.57841	-3.57841	-3.57841	-3.57841	-3.57841	-3.57841	-3.57841	-3.57841	-3.57841	-3.57841	-3.57841	-3.57841	-3.57841	-3.57841	-3.57841	-3.57841	-3.57841	-3.57841	-3.57841	-3.57841	-3.57841	-3.57841	-3.57841	-3.57841	5.50582	5.70137	5.48021	5.63426
Sorbs2	-2.36389	0.119701	-0.518148	-2.32698	-1.93646	-2.34712	-3.62842	-3.62842	-3.62842	-1.81254	-2.8416	-2.94059	-2.61214	-3.62842	-3.62842	-3.62842	-3.62842	-3.62842	-3.62842	-3.62842	-3.62842	-3.62842	-3.62842	-1.68309	-3.62842	-3.62842	-3.62842	-3.62842	-3.62842	-3.62842	-3.62842	-3.62842	-3.62842	-3.62842	-3.62842	-3.62842	-3.62842	-3.62842	-3.62842	-3.62842	-3.62842	-3.62842	-3.62842	-3.62842	-3.62842	6.27778	6.24006	5.8771	6.9534
Cryab	5.35071	-4.33379	4.84459	-2.11288	1.88772	-4.33379	3.62163	3.56614	-4.33379	-4.33379	-4.33379	-4.33379	-4.33379	-4.33379	-4.33379	-4.33379	-4.33379	-4.33379	-2.21198	-4.33379	-4.33379	-4.33379	-4.33379	-4.33379	-1.32199	-4.33379	-4.33379	-4.33379	-4.33379	-4.33379	-4.33379	-4.33379	-0.773238	0.686553	1.6967	1.58335	2.66589	-4.33379	-4.33379	2.04547	2.37738	-4.33379	-4.33379	3.95856	-4.33379	6.44048	5.95111	6.63706	6.46545
Myl9	2.20457	-4.52875	3.08686	-5.69462	2.75718	-2.05717	1.70958	-5.02141	3.86865	1.55563	-3.27464	-4.54295	1.89983	-0.679177	-2.9725	-4.95306	-5.69462	-3.54532	-5.69462	-5.69462	-5.69462	-5.69462	-5.69462	-5.69462	1.20048	-5.69462	0.612111	-5.69462	-5.69462	-5.28939	-5.69462	-4.49623	-1.26062	-5.69462	3.75742	3.7516	0.872938	-5.69462	-5.69462	-5.69462	-5.69462	-5.69462	-5.69462	0.876225	-4.89087	5.64127	5.15983	4.81078	5.30481
Popdc2	2.60225	1.74824	2.22311	3.10946	-0.178446	-3.74949	2.22912	-5.03079	-5.03079	0.464687	0.0640393	0.91114	-5.03079	-5.03079	-5.03079	-5.03079	-5.03079	-5.03079	-5.03079	-5.03079	-5.03079	-5.03079	-5.03079	-5.03079	-5.03079	-5.03079	-5.03079	-5.03079	-5.03079	-5.03079	-5.03079	-5.03079	-2.468	-5.03079	0.347118	0.92183	-5.03079	-5.03079	-2.72379	-5.03079	3.26733	-2.91982	-5.03079	-2.65765	-1.18064	5.93603	4.72659	5.54328	6.05832
Ptn	3.5542	-0.738942	-3.64802	-1.32369	-4.61477	-2.66574	2.85893	-4.61477	5.02202	4.29384	-4.61477	-4.61477	4.30171	-4.61477	-4.61477	-4.61477	-4.61477	-4.61477	-4.61477	-4.61477	-4.61477	-4.61477	-4.61477	-4.61477	-4.61477	-4.61477	-3.75545	-3.01949	-1.73921	-4.61477	-4.61477	-4.61477	-3.62804	-0.826632	-4.61477	-4.61477	-4.61477	-4.61477	1.21414	-4.61477	-4.61477	-4.61477	-4.61477	-4.61477	-4.61477	1.78357	-4.61477	0.0216143	-4.61477
Serpinf1	-2.57265	-2.57265	-2.57265	-2.57265	-2.57265	-2.57265	-2.57265	-2.57265	1.75116	1.43853	5.4929	-2.57265	1.70597	-2.57265	-2.57265	-2.57265	-2.57265	-2.57265	-2.57265	-2.57265	-2.57265	-2.57265	-2.57265	-2.57265	-2.57265	-2.57265	-2.57265	-2.57265	-2.57265	-2.57265	-2.57265	-2.57265	-2.57265	-2.57265	-2.57265	-1.24813	-2.57265	-2.57265	-2.57265	-2.57265	-2.57265	-2.57265	-2.57265	-2.57265	3.96206	-2.57265	-2.57265	-2.57265	-2.57265
Lpar1	-4.07767	2.41296	-4.07767	-4.07767	-0.0231082	3.14904	5.48071	-4.07767	5.70732	-4.07767	-1.31167	2.62603	5.92695	-0.560626	-4.07767	-4.07767	-4.07767	-4.07767	-4.07767	-4.07767	-4.07767	-0.584839	-4.07767	-4.07767	2.87037	-4.07767	3.31386	-1.25705	4.33497	-4.07767	4.61635	0.706005	3.27955	-4.07767	-4.07767	-4.07767	-4.07767	3.89124	2.23351	-4.07767	-4.07767	-4.07767	4.55125	-3.04545	-4.07767	-4.07767	1.65383	2.03245	-4.07767
Lix1	-3.42105	3.92517	-3.42105	3.35231	4.41536	-3.42105	-3.42105	-2.66932	-3.42105	4.80695	-1.00107	-3.42105	-2.82521	-3.42105	-3.42105	-3.42105	-3.42105	-3.42105	-3.42105	-3.42105	5.08124	-3.42105	-3.42105	-3.42105	4.25743	-3.42105	0.48466	4.89395	-3.42105	-3.42105	-3.42105	-3.42105	-3.42105	-3.42105	-3.42105	-3.42105	-1.3971	-3.42105	-2.33145	-3.42105	-0.513722	-3.42105	-3.42105	-3.42105	-3.42105	-3.42105	-3.42105	-3.42105	-3.42105
Igdcc3	2.62284	1.38297	-4.54058	1.04052	1.49718	2.47903	-3.86511	2.0285	0.18925	1.71911	0.813094	4.08291	1.39816	-1.02354	-4.54058	-2.94797	-4.54058	-4.54058	-4.54058	-2.52809	-2.92855	-1.70172	-4.54058	-1.79588	-3.33365	-4.54058	1.65835	2.25937	-2.59479	-2.25026	-0.681178	-4.54058	1.18815	-0.947551	2.91278	-3.21606	0.499273	-4.54058	2.41979	-0.723365	-1.23049	-4.54058	-4.54058	-3.50836	-1.46054	-4.54058	-4.54058	-4.54058	-4.54058
Peg12	2.23717	3.42127	-5.64925	-5.64925	-2.51038	2.07387	-5.64925	3.4489	4.46518	5.30326	4.97837	4.70618	2.96048	-5.64925	-5.64925	-5.64925	-5.64925	-5.64925	-5.64925	-5.64925	-5.64925	-5.64925	-5.64925	-5.64925	-5.64925	3.34921	0.701326	1.72147	-5.64925	-5.64925	-5.64925	-5.64925	2.45863	-5.64925	-5.64925	-0.0525594	-5.64925	2.36399	2.60091	0.274803	-5.64925	-5.64925	-5.64925	-5.64925	0.14339	1.74051	-5.64925	-5.64925	3.32396
Prrx1	-3.51537	-3.51537	-3.51537	-3.51537	-2.43439	2.34815	-1.31915	5.14761	2.71541	3.00422	5.5727	4.58295	-2.49909	-3.51537	-3.51537	-1.39106	-3.51537	-0.893802	-3.51537	-3.51537	-3.01828	-3.51537	-3.51537	-3.51537	-3.51537	-3.51537	-0.322883	-3.51537	-3.51537	-3.51537	-3.51537	-3.51537	-3.51537	-3.51537	-3.51537	-3.51537	2.11276	-3.51537	0.167826	0.501787	-3.51537	-3.51537	-3.51537	-3.51537	-3.51537	-3.51537	-3.51537	-3.51537	-3.51537
Crabp2	-4.69303	-4.69303	-4.69303	-4.69303	-4.69303	1.90463	-4.69303	3.28383	1.80878	2.83354	3.03032	2.91165	-4.69303	-4.69303	-4.69303	-4.69303	-4.69303	-4.69303	-4.69303	-4.69303	1.50468	-4.69303	-4.69303	-4.69303	-4.69303	-4.69303	-3.83371	-4.69303	-4.69303	-4.69303	2.32788	-4.69303	-4.69303	-0.0559955	-4.69303	-4.69303	-1.10314	-4.69303	3.40506	2.86164	-4.69303	-3.28166	-0.030696	-4.69303	-4.69303	-4.69303	2.84098	1.55772	-4.69303
Crabp1	0.44364	-4.69414	-5.39177	1.40078	1.23994	4.27635	-5.39177	-5.39177	1.90941	3.52815	3.15991	0.799663	2.25516	1.90947	-1.39818	-0.0230267	-0.668755	0.370046	-0.779019	-1.67597	1.97573	-2.18918	-1.43826	-2.64706	-0.397203	1.37438	1.92068	3.08921	1.64456	-1.03715	4.25084	-5.39177	2.35649	0.250043	1.89754	-5.39177	1.10896	-1.9624	3.82764	-1.62919	1.69129	0.452138	-2.98791	-2.7535	3.6367	-5.39177	-5.39177	-5.39177	1.87096
Nr2f2	1.25088	0.159294	2.09018	2.77385	2.53218	0.447401	4.07709	0.119623	4.88104	-0.696698	0.488873	0.0866735	4.70923	-5.10037	-5.10037	-5.10037	-2.71218	-1.60106	-2.15462	-5.10037	-5.10037	-5.10037	-5.10037	-3.15504	-5.10037	-5.10037	-5.10037	-5.10037	-5.10037	-5.10037	-5.10037	-5.10037	-5.10037	-4.43818	-5.10037	-5.10037	-0.966024	-1.43046	-0.982835	-5.10037	2.27809	-5.10037	-5.10037	-5.10037	-5.10037	-5.10037	-5.10037	-0.570385	-5.10037
Alx1	-2.24887	-2.24887	-2.24887	-2.24887	-2.24887	3.78182	-2.24887	2.74751	-2.24887	-2.24887	-1.46205	-2.24887	-1.23259	-2.24887	-2.24887	-2.24887	-2.24887	-2.24887	-2.24887	-2.24887	-2.24887	-2.24887	-2.24887	-2.24887	-2.24887	-2.24887	3.36693	-2.24887	-2.24887	-2.24887	-2.24887	-2.24887	-2.24887	-1.58667	-2.24887	-2.24887	-2.24887	-2.24887	-2.24887	-1.21488	-2.24887	-2.24887	-2.24887	-2.24887	-2.24887	-2.24887	-2.24887	-2.24887	-2.24887
Zfhx4	-2.27226	-2.27226	-2.27226	-2.27226	-2.27226	-2.27226	-2.27226	3.07962	3.91952	-2.27226	-1.48544	-2.27226	-2.27226	-2.27226	-0.753155	-2.27226	-2.27226	-2.27226	-0.150453	-2.27226	-2.27226	-2.27226	-2.27226	-2.27226	-2.27226	-2.27226	-2.27226	-2.27226	-2.27226	-2.27226	-2.27226	-2.27226	-2.27226	-2.27226	-0.525997	-2.27226	-2.27226	-2.27226	-2.27226	-2.27226	-2.27226	1.2529	-2.27226	-2.27226	-2.27226	-2.27226	-2.27226	4.98575	-2.27226
Sema3a	-4.76278	-4.76278	-3.79603	-2.06231	-4.76278	-4.76278	-4.76278	-4.76278	3.26434	4.624	-4.76278	5.05971	-3.7465	-4.76278	-4.76278	-4.76278	-3.12239	-4.76278	-4.76278	-4.76278	-4.76278	-4.76278	-4.76278	-4.76278	-4.76278	-4.76278	-4.76278	-4.76278	-4.76278	-4.76278	-4.76278	-4.76278	-4.76278	-4.76278	-4.76278	-4.76278	-4.76278	-4.76278	-4.76278	-4.76278	-4.76278	-4.76278	-4.76278	-4.76278	-4.76278	3.62267	-0.552066	2.80583	1.38294
Ddr2	-1.79756	-1.79756	-1.79756	-1.79756	-1.79756	-1.79756	-1.12208	-1.79756	2.789	-1.79756	-1.79756	-1.79756	4.05443	-1.79756	-1.79756	-1.79756	-1.79756	-1.79756	-1.79756	-1.79756	-1.79756	-1.79756	-1.79756	-1.79756	-1.79756	-1.79756	-1.79756	-1.79756	-1.79756	-1.79756	-1.79756	-1.79756	-1.79756	-1.79756	-1.79756	-1.79756	-1.79756	-1.79756	-1.79756	-1.79756	-1.79756	-1.79756	-1.79756	-1.79756	-1.79756	-1.79756	-1.79756	-1.79756	-1.79756
Col3a1	6.54724	3.45501	7.0465	3.86776	2.00851	-2.84383	7.73909	-2.84383	4.46621	-2.84383	-2.84383	-2.84383	-2.84383	-2.84383	-2.84383	-2.84383	-2.84383	-2.84383	-2.84383	-2.84383	-2.84383	-2.84383	-2.84383	-2.84383	-2.84383	-2.84383	-2.84383	-2.84383	-2.84383	-2.84383	-2.84383	-2.84383	-2.84383	-2.84383	1.81916	-2.03462	-2.84383	-2.84383	-2.84383	-2.84383	-2.84383	-2.84383	-2.84383	-2.84383	-2.84383	-2.84383	-2.84383	-2.84383	-2.84383
Efna5	2.25825	-7.11913	4.54365	0.940766	-7.11913	-1.91889	2.86462	-4.45203	3.73226	3.85252	2.5677	3.17656	4.14025	1.69552	1.44296	1.55409	1.02363	0.817302	0.466482	0.336199	1.55854	-0.0274247	-0.373908	-0.169543	3.34096	1.63857	3.07838	1.3444	0.93425	-6.71389	2.53649	-3.38567	0.0540789	2.39547	0.625772	2.48881	2.30327	0.933585	1.20653	1.17667	1.88708	-7.11913	-7.11913	2.48174	1.99336	-0.720788	-6.24405	2.93694	-7.11913
Zfp462	2.57167	2.15023	2.23448	1.93096	1.69353	3.0895	1.10986	1.31538	-0.408982	-0.43755	0.978695	-3.11714	0.0838951	-4.26881	-4.26881	-4.26881	-4.26881	-4.26881	-4.26881	-4.26881	-4.26881	-4.26881	-4.26881	-4.26881	2.30818	-4.26881	-4.26881	-4.26881	-4.26881	-4.26881	-4.26881	-3.07042	-2.28875	-1.76803	2.044	0.421841	0.140029	-4.26881	0.357105	-2.21812	-0.0968163	-4.26881	-4.26881	2.11607	-4.26881	-4.26881	-0.230471	-0.347975	-4.26881
Hdgfrp3	-3.99698	-3.99698	4.40761	1.7309	-2.91599	-0.359523	2.11306	2.09454	-1.53592	-1.25892	-3.99698	-3.99698	3.63515	0.455637	0.156441	-2.11416	-1.09811	-3.99698	-1.05122	-1.71775	-0.998203	-3.99698	-3.99698	0.0681627	-2.49523	-3.99698	2.01603	-3.67194	0.670052	-3.99698	5.22946	1.65275	-3.01024	4.82828	4.46196	4.11716	1.70679	3.64806	-0.442236	-3.99698	0.357627	-3.99698	1.5944	-1.13482	-3.19322	-3.99698	-3.99698	-3.99698	-3.99698
Sulf2	-4.15167	-3.35259	-4.15167	-1.74196	3.16482	4.40379	-2.85829	-1.96963	2.09623	-4.15167	-2.75161	4.25004	-1.53967	-4.15167	-4.15167	-4.15167	-4.15167	-4.15167	-4.15167	1.01424	-4.15167	-0.949082	-1.60796	1.96582	-4.15167	-1.88802	0.363653	-3.46099	-2.97039	0.104038	3.36163	-4.15167	-3.09518	-3.40191	-4.15167	-4.15167	-4.15167	-4.15167	-4.15167	-4.15167	3.00562	-4.15167	-4.15167	-1.77853	-3.34791	-4.15167	-2.8532	-4.15167	-1.23302
Mfap2	2.0549	0.790878	-2.20585	-3.5475	1.25078	1.98348	-0.407704	2.34649	3.61933	2.55814	-6.7264	0.502901	1.86049	-3.20935	-1.09647	0.585735	-0.341265	-1.05896	-1.14343	-1.14026	-6.7264	-1.13588	-1.60472	-1.98972	-2.61997	-0.635213	-3.53391	-2.37185	-6.3292	-6.7264	-6.7264	1.41966	-2.29239	-6.0642	-0.961458	-5.40187	0.555069	-1.74351	-3.48439	-6.7264	-2.43013	-6.09106	-1.34181	-6.7264	1.27785	-6.7264	2.30928	-6.7264	1.64891
Clmp	1.55169	5.39293	7.03185	2.67468	0.323544	-2.81532	4.84879	2.12628	4.89746	-2.81532	-2.81532	1.09634	5.11147	-2.81532	-2.81532	-2.81532	-2.81532	-2.81532	-2.81532	0.521581	3.1833	-2.81532	-0.271617	-0.869992	1.15321	-2.81532	-0.258254	0.407924	-2.81532	-2.81532	0.724812	-2.81532	-0.0307797	-2.81532	-2.81532	-2.81532	-0.791374	-2.81532	-2.81532	-0.764631	-2.81532	-2.81532	-2.81532	3.37681	-2.81532	-2.81532	-2.81532	-2.81532	-2.81532
Tpbg	1.04884	-1.86469	3.17897	-2.56233	-2.56233	-2.56233	-1.08135	2.29301	-1.56133	3.7893	-2.56233	-1.41065	-2.56233	-2.56233	-2.56233	-2.56233	-2.56233	-2.56233	-2.56233	-2.56233	2.431	-2.56233	-2.56233	-2.56233	0.583477	-2.56233	2.15136	-2.56233	-2.56233	-2.56233	6.42849	-2.56233	2.26993	-2.56233	-2.56233	-1.75312	2.21251	-2.56233	-1.13353	-1.95461	-2.56233	-2.56233	-2.56233	-0.514261	5.09819	-2.56233	-2.56233	-1.64844	-2.56233
Marcks	2.55743	1.99636	3.12793	-0.212782	1.44894	-1.77167	3.19692	0.580429	3.08416	1.10462	-0.746094	1.40116	3.72029	-0.351198	-0.422645	0.053464	-0.0694475	-0.459885	0.576853	-1.00892	1.9307	-0.828627	-2.63119	-0.974375	1.17338	0.949512	1.71759	1.64515	1.65042	1.92493	1.9061	0.659442	1.48079	1.85492	3.52584	1.25549	1.92719	1.37146	1.79454	0.436003	1.46688	0.0690477	0.779882	-1.10995	2.29986	-1.47594	-8.04398	0.32176	-8.08713
Tcf12	-1.27505	-2.22008	-1.33363	2.75255	1.48085	0.471126	-3.73817	-6.26849	3.49837	1.80881	3.37451	1.84899	2.97329	1.70739	-1.9712	0.637698	2.26073	0.86247	1.00959	1.93048	0.0306783	0.756601	0.34057	0.746163	0.476302	0.324086	1.81097	-2.8282	-5.8713	0.00225765	-6.26849	-0.906027	0.30505	1.74205	-4.90677	-2.94267	-0.107813	1.50805	3.30717	-2.39863	2.97426	-2.74333	-2.0294	-0.323169	-1.72196	-6.26849	0.710112	-0.398941	2.84637
Asxl3	3.16868	-1.97541	-0.0255773	-1.97541	-1.97541	-1.97541	-1.97541	2.87992	-1.38978	-1.97541	-1.97541	-1.97541	-1.97541	-1.97541	-1.97541	-1.97541	-1.97541	-1.97541	-1.97541	-1.97541	-1.97541	-1.97541	-1.97541	-1.97541	0.16275	3.8856	-1.97541	-1.97541	-1.57821	-1.97541	-1.97541	-1.97541	-1.97541	-1.97541	-0.613683	-1.97541	-1.97541	-1.97541	-1.97541	-1.97541	6.36663	-1.97541	-1.97541	-1.97541	0.971462	-1.97541	1.90848	0.206149	-1.97541
[truncated: 148 more columns]

## Sheet: Figure_2c
ISL1		NKX2-5
cluster	ic	cluster	ic
cluster 1	1.13467	cluster 1	0.541455
cluster 1	1.00723	cluster 1	0.618234
cluster 1	1.06141	cluster 1	0.656011
cluster 1	1.13448	cluster 1	0.601564
cluster 1	1.06182	cluster 1	0.657702
cluster 1	1.05803	cluster 1	0.639402
cluster 1	1.08569	cluster 1	0.640361
cluster 1	1.03992	cluster 1	0.716433
cluster 1	1.13759	cluster 1	0.5926
cluster 1	1.03045	cluster 1	0.682328
cluster 1	1.09849	cluster 1	0.602137
cluster 1	1.16286	cluster 1	0.604044
cluster 1	1.00674	cluster 1	0.603031
cluster 1	1.06149	cluster 1	0.56772
cluster 1	1.03202	cluster 1	0.689252
cluster 1	1.15516	cluster 1	0.587177
cluster 1	1.04739	cluster 1	0.593453
cluster 1	1.08849	cluster 1	0.646103
cluster 1	1.14166	cluster 1	0.578556
cluster 1	1.05368	cluster 1	0.678636
cluster 1	1.16379	cluster 1	0.613953
cluster 1	1.01176	cluster 1	0.671398
cluster 1	1.07473	cluster 1	0.708091
cluster 1	1.05553	cluster 1	0.623473
cluster 1	1.09935	cluster 1	0.563019
cluster 1	1.10512	cluster 1	0.548882
cluster 1	1.0432	cluster 1	0.738089
cluster 1	1.14063	cluster 1	0.686475
cluster 1	1.07441	cluster 1	0.630019
cluster 1	1.06016	cluster 1	0.602149
cluster 1	1.00159	cluster 1	0.68259
cluster 1	1.07639	cluster 1	0.617678
cluster 1	1.15531	cluster 1	0.535713
cluster 1	1.12368	cluster 1	0.613964
cluster 1	1.03256	cluster 1	0.562713
cluster 1	1.0367	cluster 1	0.605957
cluster 1	1.03461	cluster 1	0.599404
cluster 1	1.08292	cluster 1	0.645225
cluster 1	1.13109	cluster 1	0.547808
cluster 1	0.971277	cluster 1	0.658365
cluster 1	1.0555	cluster 1	0.707069
cluster 1	1.12685	cluster 1	0.671185
cluster 1	1.0547	cluster 1	0.588562
cluster 1	1.13547	cluster 1	0.651969
cluster 1	1.115	cluster 1	0.664816
cluster 1	1.0464	cluster 1	0.620847
cluster 1	1.05201	cluster 1	0.704776
cluster 1	1.0487	cluster 1	0.71069
cluster 1	1.04003	cluster 1	0.684411
cluster 1	1.1798	cluster 1	0.560277
cluster 1	1.04131	cluster 1	0.640444
cluster 1	1.11509	cluster 1	0.574796
cluster 1	1.04933	cluster 1	0.540969
cluster 1	0.966374	cluster 1	0.623406
cluster 1	1.07004	cluster 1	0.590858
cluster 1	1.05212	cluster 1	0.606642
cluster 1	1.0385	cluster 1	0.716869
cluster 1	1.02521	cluster 1	0.634746
cluster 1	1.09814	cluster 1	0.564247
cluster 1	1.11638	cluster 1	0.693614
cluster 1	1.12543	cluster 1	0.621396
cluster 1	1.08559	cluster 1	0.551469
cluster 1	1.14783	cluster 1	0.667552
cluster 1	1.05816	cluster 1	0.687031
cluster 1	1.13951	cluster 1	0.652341
cluster 1	1.12289	cluster 1	0.690342
cluster 1	1.1436	cluster 1	0.634083
cluster 1	1.10629	cluster 1	0.6278
cluster 1	1.00523	cluster 1	0.57769
cluster 1	1.00983	cluster 1	0.558947
cluster 1	1.10485	cluster 1	0.606512
cluster 1	1.02637	cluster 1	0.542669
cluster 1	1.1238	cluster 1	0.624701
cluster 1	1.02248	cluster 1	0.534951
cluster 1	1.07187	cluster 1	0.714307
cluster 1	1.06368	cluster 1	0.569253
cluster 1	1.1754	cluster 1	0.541341
cluster 1	1.05134	cluster 1	0.664258
cluster 1	1.09041	cluster 1	0.652052
cluster 1	1.11473	cluster 1	0.594178
cluster 1	1.08537	cluster 1	0.714267
cluster 1	1.10875	cluster 1	0.736294
cluster 1	0.982286	cluster 1	0.601201
cluster 1	1.15646	cluster 1	0.59562
cluster 1	1.11365	cluster 1	0.583541
cluster 1	1.06582	cluster 1	0.70391
cluster 1	0.988604	cluster 1	0.589409
cluster 1	1.16082	cluster 1	0.599817
cluster 1	1.06863	cluster 1	0.683195
cluster 1	1.10732	cluster 1	0.659776
cluster 1	1.19569	cluster 1	0.58383
cluster 1	1.04365	cluster 1	0.593752
cluster 1	1.0585	cluster 1	0.69755
cluster 1	1.09944	cluster 1	0.641428
cluster 1	1.03322	cluster 1	0.678635
cluster 1	1.19175	cluster 1	0.625221
cluster 1	0.958508	cluster 1	0.591402
cluster 1	1.15215	cluster 1	0.583976
cluster 1	1.07001	cluster 1	0.660878
cluster 1	1.12724	cluster 1	0.640404
cluster 1	0.989326	cluster 1	0.575401
cluster 1	1.19574	cluster 1	0.638242
cluster 1	1.12995	cluster 1	0.654118
cluster 1	1.07063	cluster 1	0.581333
cluster 1	1.1473	cluster 1	0.606044
cluster 1	1.14005	cluster 1	0.597643
cluster 1	1.18767	cluster 1	0.531784
cluster 1	1.05387	cluster 1	0.685671
cluster 1	1.04549	cluster 1	0.594994
cluster 1	1.08756	cluster 1	0.592181
cluster 1	0.989383	cluster 1	0.621247
cluster 1	1.07958	cluster 1	0.718652
cluster 1	1.11829	cluster 1	0.609213
cluster 1	1.07305	cluster 1	0.6407
cluster 1	1.02612	cluster 1	0.609399
cluster 1	1.23003	cluster 1	0.711094
cluster 1	1.06768	cluster 1	0.65332
cluster 1	1.07133	cluster 1	0.542341
cluster 1	0.955487	cluster 1	0.589344
cluster 1	1.16285	cluster 1	0.614618
cluster 1	1.11314	cluster 1	0.633547
cluster 1	1.04983	cluster 1	0.700419
cluster 1	1.07124	cluster 1	0.767272
cluster 1	1.09659	cluster 1	0.603075
cluster 1	1.14173	cluster 1	0.654631
cluster 1	1.09454	cluster 1	0.628777
cluster 1	1.1601	cluster 1	0.693594
cluster 1	1.05196	cluster 1	0.606196
cluster 1	1.03617	cluster 1	0.603572
cluster 1	1.08393	cluster 1	0.62456
cluster 1	1.16372	cluster 1	0.615862
cluster 1	1.13179	cluster 1	0.645254
cluster 1	1.13984	cluster 1	0.607867
cluster 1	1.14041	cluster 1	0.71015
cluster 1	1.14347	cluster 1	0.62094
cluster 1	0.989786	cluster 1	0.628021
cluster 1	1.08703	cluster 1	0.601705
cluster 1	1.17751	cluster 1	0.610369
cluster 1	1.02505	cluster 1	0.629621
cluster 1	1.13998	cluster 1	0.689947
cluster 1	1.108	cluster 1	0.595384
cluster 1	1.16336	cluster 1	0.644128
cluster 1	1.22281	cluster 1	0.56589
cluster 1	1.1519	cluster 1	0.576254
cluster 1	1.19126	cluster 1	0.635813
cluster 1	1.08332	cluster 1	0.652152
cluster 1	1.03577	cluster 1	0.776431
cluster 1	1.04688	cluster 1	0.668955
cluster 1	1.15793	cluster 1	0.605833
cluster 1	1.19223	cluster 1	0.684416
cluster 1	1.05678	cluster 1	0.645345
cluster 1	1.09299	cluster 1	0.634011
cluster 1	1.09421	cluster 1	0.605176
cluster 1	1.17271	cluster 1	0.589412
cluster 1	1.02171	cluster 1	0.664318
cluster 1	1.08512	cluster 1	0.611171
cluster 1	1.14403	cluster 1	0.594951
cluster 1	1.02083	cluster 1	0.622385
cluster 1	1.16895	cluster 1	0.596467
cluster 1	1.02815	cluster 1	0.606399
cluster 1	0.959458	cluster 1	0.704585
cluster 1	1.1112	cluster 1	0.630221
cluster 1	1.03532	cluster 1	0.636699
cluster 1	1.18928	cluster 1	0.571117
cluster 1	0.934159	cluster 1	0.624347
cluster 1	1.07238	cluster 1	0.59312
cluster 1	1.09373	cluster 1	0.620275
cluster 1	1.09211	cluster 1	0.64296
cluster 1	1.11579	cluster 1	0.557147
cluster 1	1.0848	cluster 1	0.651989
cluster 1	1.06699	cluster 1	0.599908
cluster 1	1.15307	cluster 1	0.634205
cluster 1	1.07275	cluster 1	0.70467
cluster 1	1.11728	cluster 1	0.695581
cluster 1	1.07571	cluster 1	0.568551
cluster 1	1.00101	cluster 1	0.658435
cluster 1	1.04884	cluster 1	0.609257
cluster 1	1.01758	cluster 1	0.643752
cluster 1	1.22559	cluster 1	0.585405
cluster 1	1.04678	cluster 1	0.739086
cluster 1	1.11828	cluster 1	0.617062
cluster 1	1.07663	cluster 1	0.638267
cluster 1	1.07889	cluster 1	0.712203
cluster 1	1.12367	cluster 1	0.595862
cluster 1	1.03044	cluster 1	0.668095
cluster 1	1.02396	cluster 1	0.64668
cluster 1	1.13562	cluster 1	0.705531
cluster 1	1.20533	cluster 1	0.623916
cluster 1	1.09199	cluster 1	0.700896
cluster 1	1.0728	cluster 1	0.683494
cluster 1	1.10568	cluster 1	0.681505
cluster 1	1.03097	cluster 1	0.728419
cluster 1	1.12506	cluster 1	0.624341
cluster 1	1.12497	cluster 1	0.600713
cluster 1	1.18477	cluster 1	0.736636
cluster 1	1.07855	cluster 1	0.71737
cluster 1	1.04738	cluster 1	0.656319
cluster 1	0.983734	cluster 1	0.57428
cluster 1	1.05808	cluster 1	0.634049
cluster 1	1.07328	cluster 1	0.650742
cluster 1	1.13321	cluster 1	0.661269
cluster 1	1.06271	cluster 1	0.752748
cluster 1	1.03423	cluster 1	0.646884
cluster 1	1.06431	cluster 1	0.611644
cluster 1	0.890328	cluster 1	0.673919
cluster 1	1.0772	cluster 1	0.669217
cluster 1	1.043	cluster 1	0.66453
cluster 1	1.09382	cluster 1	0.600051
cluster 1	1.03955	cluster 1	0.599575
cluster 1	1.09768	cluster 1	0.712382
cluster 1	1.15508	cluster 1	0.576468
cluster 1	0.980577	cluster 1	0.686685
cluster 1	1.21563	cluster 1	0.690649
cluster 1	1.01957	cluster 1	0.623341
cluster 1	1.07653	cluster 1	0.657619
cluster 1	1.11756	cluster 1	0.72584
cluster 1	1.19444	cluster 1	0.579455
cluster 1	1.13264	cluster 1	0.56374
cluster 1	1.12081	cluster 1	0.656463
cluster 1	1.10116	cluster 1	0.616679
cluster 1	1.08417	cluster 1	0.586139
cluster 1	1.0051	cluster 1	0.563277
cluster 1	1.03001	cluster 1	0.645777
cluster 1	1.17131	cluster 1	0.682594
cluster 1	1.17565	cluster 1	0.622376
cluster 1	0.989859	cluster 1	0.653828
cluster 1	1.02134	cluster 1	0.580554
cluster 1	1.1142	cluster 1	0.604816
cluster 1	1.14163	cluster 1	0.645813
cluster 1	1.09547	cluster 1	0.682531
cluster 1	1.00534	cluster 1	0.701834
cluster 1	1.16068	cluster 1	0.680293
cluster 1	1.13555	cluster 1	0.577549
cluster 1	1.01938	cluster 1	0.655256
cluster 1	1.08832	cluster 1	0.6118
cluster 1	0.957891	cluster 1	0.630956
cluster 1	1.17054	cluster 1	0.675706
cluster 1	0.977363	cluster 1	0.673747
cluster 1	1.28694	cluster 1	0.639972
cluster 1	1.56059	cluster 1	0.670449
cluster 1	1.11834	cluster 1	0.567517
cluster 1	1.04449	cluster 1	0.681599
cluster 1	1.26636	cluster 1	0.622875
cluster 1	1.12688	cluster 1	0.635338
cluster 1	0.997984	cluster 1	0.64465
cluster 1	1.17082	cluster 1	0.576917
cluster 1	1.06874	cluster 1	0.696194
cluster 1	1.18451	cluster 1	0.648754
cluster 1	1.0172	cluster 1	0.6242
cluster 1	1.17132	cluster 1	0.589
cluster 1	1.13946	cluster 1	0.541752
cluster 1	1.02679	cluster 1	0.725084
cluster 1	1.17347	cluster 1	0.631583
cluster 1	1.08498	cluster 1	0.52265
cluster 1	1.03644	cluster 1	0.60625
cluster 1	1.02189	cluster 1	0.650615
cluster 1	1.11485	cluster 1	0.624432
cluster 1	1.10186	cluster 1	0.594278
cluster 1	1.13418	cluster 1	0.583173
cluster 1	1.11708	cluster 1	0.62015
cluster 1	1.18276	cluster 1	0.616519
cluster 1	1.05531	cluster 1	0.676725
cluster 1	1.16771	cluster 1	0.574576
cluster 1	1.05981	cluster 1	0.627851
cluster 1	1.16892	cluster 1	0.61758
cluster 1	1.02975	cluster 1	0.735541
cluster 1	1.07231	cluster 1	0.667712
cluster 1	1.00591	cluster 1	0.53678
cluster 1	1.18921	cluster 1	0.612973
cluster 1	1.09896	cluster 1	0.639496
cluster 1	1.17539	cluster 1	0.660425
cluster 1	1.0454	cluster 1	0.632826
cluster 1	1.18824	cluster 1	0.606889
cluster 1	0.982856	cluster 1	0.675487
cluster 1	0.931382	cluster 1	0.62068
cluster 1	1.04973	cluster 1	0.610817
cluster 1	1.09035	cluster 1	0.530751
cluster 1	1.06792	cluster 1	0.642244
cluster 1	1.0852	cluster 1	0.648118
cluster 1	1.06348	cluster 1	0.605656
cluster 1	1.114	cluster 1	0.578906
cluster 1	1.16818	cluster 1	0.673025
cluster 1	1.07595	cluster 1	0.617549
cluster 1	0.879928	cluster 1	0.607576
cluster 1	1.02729	cluster 1	0.572919
cluster 1	1.08007	cluster 1	0.663782
cluster 1	1.0656	cluster 1	0.5721
cluster 1	1.08616	cluster 1	0.65406
cluster 1	0.974593	cluster 1	0.634004
cluster 1	1.03892	cluster 1	0.662833
cluster 1	1.01687	cluster 1	0.675232
cluster 1	1.12839	cluster 1	0.573781
cluster 1	1.09003	cluster 1	0.672287
cluster 1	1.04073	cluster 1	0.642216
cluster 1	1.1172	cluster 1	0.657359
cluster 1	1.09596	cluster 1	0.650967
cluster 1	1.1017	cluster 1	0.65165
cluster 1	1.01892	cluster 1	0.658772
cluster 1	1.04446	cluster 1	0.617218
cluster 1	0.938081	cluster 1	0.666486
cluster 1	1.127	cluster 1	0.618931
cluster 1	1.04501	cluster 1	0.645563
cluster 1	1.05301	cluster 1	0.621467
cluster 1	1.04605	cluster 1	0.654749
cluster 1	1.04284	cluster 1	0.680138
cluster 1	1.11354	cluster 1	0.554728
cluster 1	1.063	cluster 1	0.578359
cluster 1	1.14485	cluster 1	0.65563
cluster 1	1.09664	cluster 1	0.637771
cluster 1	1.14319	cluster 1	0.650613
cluster 1	1.10547	cluster 1	0.638062
cluster 1	0.990327	cluster 1	0.638787
cluster 1	1.294	cluster 1	0.588594
cluster 1	1.15464	cluster 1	0.594771
cluster 1	1.01889	cluster 1	0.689092
cluster 1	1.07426	cluster 1	0.651824
cluster 1	1.1282	cluster 1	0.580923
cluster 1	1.01214	cluster 1	0.667776
cluster 1	1.02037	cluster 1	0.642982
cluster 1	1.17096	cluster 1	0.632758
cluster 1	0.958467	cluster 1	0.65506
cluster 1	1.0643	cluster 1	0.613718
cluster 1	1.26701	cluster 1	0.6302
cluster 1	1.1652	cluster 1	0.68516
cluster 1	0.977267	cluster 1	0.657231
cluster 1	1.06082	cluster 1	0.627987
cluster 1	1.0205	cluster 1	0.667112
cluster 1	1.12824	cluster 1	0.604947
cluster 1	1.21401	cluster 1	0.641169
cluster 1	1.20653	cluster 1	0.59296
cluster 1	1.00437	cluster 1	0.690796
cluster 1	1.07703	cluster 1	0.631603
cluster 1	1.20182	cluster 1	0.700285
cluster 1	1.17122	cluster 1	0.685629
cluster 1	1.02036	cluster 1	0.718996
cluster 1	1.07696	cluster 1	0.659351
cluster 1	1.09962	cluster 1	0.603426
cluster 1	1.14048	cluster 1	0.621587
cluster 1	1.08138	cluster 1	0.667664
cluster 1	1.06492	cluster 1	0.552063
cluster 1	0.987984	cluster 1	0.581858
cluster 1	1.08007	cluster 1	0.602186
cluster 1	1.05588	cluster 1	0.675261
cluster 1	0.983883	cluster 1	0.639879
cluster 1	1.01963	cluster 1	0.588713
cluster 1	1.10977	cluster 1	0.668872
cluster 1	1.04296	cluster 1	0.643605
cluster 1	1.09703	cluster 1	0.623854
cluster 1	1.04968	cluster 1	0.565093
cluster 1	1.09024	cluster 1	0.63399
cluster 1	1.12132	cluster 1	0.59157
cluster 1	1.0365	cluster 1	0.664855
cluster 1	1.08572	cluster 1	0.596568
cluster 1	1.01644	cluster 1	0.623895
cluster 1	1.15894	cluster 1	0.556832
cluster 1	1.11444	cluster 1	0.627971
cluster 1	1.04652	cluster 1	0.638073
cluster 1	0.993164	cluster 1	0.581202
cluster 1	1.19816	cluster 1	0.64609
cluster 1	1.18986	cluster 1	0.589945
cluster 1	1.16526	cluster 1	0.605409
cluster 1	1.09384	cluster 1	0.64391
cluster 1	1.20662	cluster 1	0.631822
cluster 1	1.06244	cluster 1	0.609791
cluster 1	0.871632	cluster 1	0.598733
cluster 1	1.01971	cluster 1	0.592044
cluster 1	1.14078	cluster 1	0.594997
cluster 1	1.12827	cluster 1	0.715888
cluster 1	1.02968	cluster 1	0.554432
cluster 1	1.0924	cluster 1	0.583831
cluster 1	1.13731	cluster 1	0.600535
cluster 1	1.23705	cluster 1	0.605487
cluster 1	1.05933	cluster 1	0.644602
cluster 1	1.24772	cluster 1	0.599827
cluster 1	1.08176	cluster 1	0.628202
cluster 1	1.1231	cluster 1	0.576526
cluster 1	1.00884	cluster 1	0.613494
cluster 1	1.12996	cluster 1	0.65044
cluster 1	1.14593	cluster 1	0.621136
cluster 1	1.03383	cluster 1	0.632574
cluster 1	1.13937	cluster 1	0.621894
cluster 1	1.08923	cluster 1	0.577939
cluster 1	0.975586	cluster 1	0.71019
cluster 1	1.03839	cluster 1	0.66013
cluster 1	1.09577	cluster 1	0.60833
cluster 1	1.17226	cluster 1	0.604828
cluster 1	1.01541	cluster 1	0.598558
cluster 1	1.06131	cluster 1	0.559213
cluster 1	1.07953	cluster 1	0.627827
cluster 1	1.17233	cluster 1	0.678506
cluster 1	1.17196	cluster 1	0.634218
cluster 1	1.06969	cluster 1	0.681337
cluster 1	1.05818	cluster 1	0.643836
cluster 1	1.07566	cluster 1	0.718914
cluster 1	1.2015	cluster 1	0.622031
cluster 1	1.29466	cluster 1	0.634289
cluster 1	1.00597	cluster 1	0.662429
cluster 1	1.05325	cluster 1	0.668208
cluster 1	1.12733	cluster 1	0.594965
cluster 1	0.972179	cluster 1	0.629836
cluster 1	0.992554	cluster 1	0.628227
cluster 1	1.02572	cluster 1	0.614251
cluster 1	1.0879	cluster 1	0.679705
cluster 1	1.07261	cluster 1	0.64916
cluster 1	1.15497	cluster 1	0.640725
cluster 1	1.0977	cluster 1	0.647916
cluster 1	1.19107	cluster 1	0.607671
cluster 1	1.14758	cluster 1	0.622143
cluster 1	1.02473	cluster 1	0.645042
cluster 1	1.04162	cluster 1	0.669139
cluster 1	0.983547	cluster 1	0.641129
cluster 1	1.0244	cluster 1	0.63786
cluster 1	1.16392	cluster 1	0.638315
cluster 1	1.01387	cluster 1	0.662963
cluster 1	1.07686	cluster 1	0.583167
cluster 1	1.15774	cluster 1	0.604182
cluster 1	1.01574	cluster 1	0.619765
cluster 1	1.13608	cluster 1	0.704464
cluster 1	1.16913	cluster 1	0.563354
cluster 1	1.07027	cluster 1	0.612456
cluster 1	1.03186	cluster 1	0.676941
cluster 1	1.04738	cluster 1	0.62231
cluster 1	1.14295	cluster 1	0.693827
cluster 1	1.12775	cluster 1	0.637426
cluster 1	1.05167	cluster 1	0.623185
cluster 1	1.10245	cluster 1	0.684818
cluster 1	1.05858	cluster 1	0.583704
cluster 1	1.03301	cluster 1	0.62449
cluster 1	1.08356	cluster 1	0.640757
cluster 1	1.10141	cluster 1	0.608763
cluster 1	1.05458	cluster 1	0.637549
cluster 1	1.07786	cluster 1	0.66787
cluster 1	1.14313	cluster 1	0.632841
cluster 1	1.04904	cluster 1	0.656531
cluster 1	1.12232	cluster 1	0.677031
cluster 1	1.07846	cluster 1	0.697807
cluster 1	1.11044	cluster 1	0.647858
cluster 1	1.0998	cluster 1	0.646964
cluster 1	1.15447	cluster 1	0.684807
cluster 1	1.10593	cluster 1	0.603597
cluster 1	1.03722	cluster 1	0.602519
cluster 1	0.995338	cluster 1	0.587272
cluster 1	1.12942	cluster 1	0.642263
cluster 1	1.07827	cluster 1	0.658461
cluster 1	1.19097	cluster 1	0.672578
cluster 1	1.07326	cluster 1	0.652044
cluster 1	0.958689	cluster 1	0.524404
cluster 1	1.03885	cluster 1	0.609561
cluster 1	1.14941	cluster 1	0.681261
cluster 1	0.979784	cluster 1	0.638074
cluster 1	1.08071	cluster 1	0.625203
cluster 1	1.03809	cluster 1	0.631659
cluster 1	1.12246	cluster 1	0.66687
cluster 1	1.11491	cluster 1	0.615066
cluster 1	0.984542	cluster 1	0.66015
cluster 1	1.20671	cluster 1	0.60221
cluster 1	1.16968	cluster 1	0.674919
cluster 1	0.918072	cluster 1	0.742138
cluster 1	1.117	cluster 1	0.639194
cluster 1	1.07235	cluster 1	0.665294
cluster 1	1.08737	cluster 1	0.619284
cluster 1	1.2111	cluster 1	0.629037
cluster 1	1.07443	cluster 1	0.552881
cluster 1	1.12208	cluster 1	0.659538
cluster 1	1.0918	cluster 1	0.666348
cluster 1	1.02824	cluster 1	0.677088
cluster 1	1.07763	cluster 1	0.617649
cluster 1	0.99048	cluster 1	0.67398
cluster 1	1.03155	cluster 1	0.63986
cluster 1	1.08181	cluster 1	0.611234
cluster 1	0.998274	cluster 1	0.693887
cluster 1	1.08404	cluster 1	0.678936
cluster 1	1.08385	cluster 1	0.635486
cluster 1	0.97561	cluster 1	0.653049
cluster 1	0.999605	cluster 1	0.591481
cluster 1	0.906683	cluster 1	0.616454
cluster 1	1.10318	cluster 1	0.58676
cluster 1	1.12122	cluster 1	0.63917
cluster 1	1.22289	cluster 1	0.579691
cluster 1	0.992236	cluster 1	0.57738
cluster 1	1.07775	cluster 1	0.59256
cluster 1	1.02813	cluster 1	0.669851
cluster 1	1.20097	cluster 1	0.827506
cluster 1	1.06343	cluster 1	0.733194
cluster 1	1.05384	cluster 1	0.550746
cluster 1	1.09258	cluster 1	0.608228
cluster 1	1.10786	cluster 1	0.619627
cluster 1	1.07655	cluster 1	0.684762
cluster 1	1.05886	cluster 1	0.739046
cluster 1	1.12492	cluster 1	0.642386
cluster 1	1.01574	cluster 1	0.671846
cluster 1	0.997217	cluster 1	0.590397
cluster 1	1.05414	cluster 1	0.622927
cluster 1	1.06076	cluster 1	0.600222
cluster 1	1.0463	cluster 1	0.64851
cluster 1	1.17319	cluster 1	0.565882
cluster 1	1.11348	cluster 1	0.592709
cluster 1	1.11928	cluster 1	0.622797
cluster 1	1.13475	cluster 1	0.62408
cluster 1	1.13395	cluster 1	0.65391
cluster 1	1.04142	cluster 1	0.659154
cluster 1	1.15943	cluster 1	0.601094
cluster 1	1.05072	cluster 1	0.575358
cluster 1	1.17123	cluster 1	0.641666
cluster 1	1.04648	cluster 1	0.668036
cluster 1	1.0601	cluster 1	0.617219
cluster 1	1.01136	cluster 1	0.633782
cluster 1	0.983018	cluster 1	0.684084
cluster 1	0.970637	cluster 1	0.626754
cluster 1	1.06822	cluster 1	0.67352
cluster 1	1.12893	cluster 1	0.61068
cluster 1	1.03091	cluster 1	0.639966
cluster 1	1.06222	cluster 1	0.558736
cluster 1	1.12507	cluster 1	0.611362
cluster 1	0.91304	cluster 1	0.72327
cluster 1	1.14376	cluster 1	0.699764
cluster 1	1.01739	cluster 1	0.626247
cluster 1	1.04639	cluster 1	0.640766
cluster 1	1.01053	cluster 1	0.663508
cluster 1	0.992733	cluster 1	0.555721
cluster 1	1.15344	cluster 1	0.645534
cluster 1	1.10181	cluster 1	0.677123
cluster 1	1.02761	cluster 1	0.681758
cluster 1	1.18463	cluster 1	0.586275
cluster 1	1.18578	cluster 1	0.541454
cluster 1	1.2131	cluster 1	0.614048
cluster 1	1.12357	cluster 1	0.655128
cluster 1	1.14405	cluster 1	0.690274
cluster 1	1.0181	cluster 1	0.627477
cluster 1	1.09791	cluster 1	0.585568
cluster 1	1.08537	cluster 1	0.618434
cluster 1	1.09152	cluster 1	0.630123
cluster 1	1.0878	cluster 1	0.558876
cluster 1	1.18209	cluster 1	0.593505
cluster 1	1.07928	cluster 1	0.663294
cluster 1	0.997463	cluster 1	0.576812
cluster 1	1.07899	cluster 1	0.592464
cluster 1	1.04757	cluster 1	0.601608
cluster 1	1.12879	cluster 1	0.712926
cluster 1	1.01945	cluster 1	0.594412
cluster 1	1.05281	cluster 1	0.602489
cluster 1	1.09197	cluster 1	0.688009
cluster 1	1.03761	cluster 1	0.733998
cluster 1	1.08236	cluster 1	0.750601
cluster 1	1.18894	cluster 1	0.716022
cluster 1	1.03666	cluster 1	0.634931
cluster 1	1.09888	cluster 1	0.627696
cluster 1	1.09454	cluster 1	0.57098
cluster 1	1.06142	cluster 1	0.653536
cluster 1	0.950043	cluster 1	0.649586
cluster 1	1.15082	cluster 1	0.65886
cluster 1	1.00518	cluster 1	0.584911
cluster 1	1.13314	cluster 1	0.57657
cluster 1	1.03813	cluster 1	0.605441
cluster 1	1.09875	cluster 1	0.684018
cluster 1	1.10284	cluster 1	0.748508
cluster 1	1.02913	cluster 1	0.600657
cluster 1	1.10947	cluster 1	0.636423
cluster 1	1.04011	cluster 1	0.656021
cluster 1	1.10778	cluster 1	0.60156
cluster 1	1.14365	cluster 1	0.651036
cluster 1	1.14138	cluster 1	0.601332
cluster 1	1.07326	cluster 1	0.713885
cluster 1	1.06194	cluster 1	0.671189
cluster 1	1.0598	cluster 1	0.705673
cluster 1	1.13197	cluster 1	0.58596
cluster 1	1.20336	cluster 1	0.588359
cluster 1	1.18004	cluster 1	0.613762
cluster 1	1.05981	cluster 1	0.569964
cluster 1	1.00042	cluster 1	0.596153
cluster 1	1.07168	cluster 1	0.582504
cluster 1	1.02578	cluster 1	0.56997
cluster 1	1.23783	cluster 1	0.588673
cluster 1	1.19421	cluster 1	0.630791
cluster 1	1.10014	cluster 1	0.578953
cluster 1	1.07793	cluster 1	0.628089
cluster 1	1.1751	cluster 1	0.620404
cluster 1	1.12844	cluster 1	0.646663
cluster 1	1.03367	cluster 1	0.696658
cluster 1	1.09791	cluster 1	0.617369
cluster 1	1.14201	cluster 1	0.801709
cluster 1	0.988048	cluster 1	0.671576
cluster 1	1.11283	cluster 1	0.615377
cluster 1	1.07006	cluster 1	0.589791
cluster 1	0.947815	cluster 1	0.753768
cluster 1	1.02201	cluster 1	0.582588
cluster 1	1.06854	cluster 1	0.622976
cluster 1	1.16021	cluster 1	0.64509
cluster 1	1.10729	cluster 1	0.650706
cluster 1	1.08409	cluster 1	0.668772
cluster 1	1.02829	cluster 1	0.664374
cluster 1	1.13712	cluster 1	0.602203
cluster 1	1.12669	cluster 1	0.625528
cluster 1	1.07202	cluster 1	0.615732
cluster 1	1.00077	cluster 1	0.616425
cluster 1	1.07776	cluster 1	0.640873
cluster 1	0.976625	cluster 1	0.692741
cluster 1	1.09571	cluster 1	0.621343
cluster 1	1.09916	cluster 1	0.63557
cluster 1	1.13011	cluster 1	0.687044
cluster 1	1.14196	cluster 1	0.66709
cluster 1	1.06767	cluster 1	0.635971
cluster 1	1.11777	cluster 1	0.618127
cluster 1	1.12435	cluster 1	0.584887
cluster 1	1.0796	cluster 1	0.630281
cluster 1	1.08536	cluster 1	0.707047
cluster 1	1.01361	cluster 1	0.571872
cluster 1	1.04685	cluster 1	0.646401
cluster 1	1.08376	cluster 1	0.618993
cluster 1	1.10035	cluster 1	0.584404
cluster 1	1.09607	cluster 1	0.635588
cluster 1	1.11196	cluster 1	0.562635
cluster 1	1.08477	cluster 1	0.670825
cluster 1	1.16765	cluster 1	0.610909
cluster 1	1.012	cluster 1	0.553135
cluster 1	1.07087	cluster 1	0.620579
cluster 1	1.1049	cluster 1	0.592671
cluster 1	1.03457	cluster 1	0.621034
cluster 1	1.03754	cluster 1	0.586258
cluster 1	1.0205	cluster 1	0.677743
cluster 1	1.04266	cluster 1	0.634709
cluster 1	0.962003	cluster 1	0.629643
cluster 1	0.9887	cluster 1	0.665405
cluster 1	1.14594	cluster 1	0.601156
cluster 1	1.04811	cluster 1	0.593262
cluster 1	0.968249	cluster 1	0.582069
cluster 1	1.11287	cluster 1	0.625328
cluster 1	1.01178	cluster 1	0.602343
cluster 1	1.04788	cluster 1	0.572533
cluster 1	1.05291	cluster 1	0.705483
cluster 1	1.05616	cluster 1	0.620037
cluster 1	1.12302	cluster 1	0.643204
cluster 1	1.13785	cluster 1	0.667331
cluster 1	0.968831	cluster 1	0.59297
cluster 1	1.09039	cluster 1	0.644664
cluster 1	1.15638	cluster 1	0.585594
cluster 1	1.0851	cluster 1	0.629392
cluster 1	1.06851	cluster 1	0.683113
cluster 1	1.03123	cluster 1	0.60331
cluster 1	1.13917	cluster 1	0.625574
cluster 1	1.12961	cluster 1	0.61814
cluster 1	1.12456	cluster 1	0.700334
cluster 1	1.13576	cluster 1	0.667572
cluster 1	0.982449	cluster 1	0.654747
cluster 1	1.19864	cluster 1	0.627045
cluster 1	0.891386	cluster 1	0.574126
cluster 1	1.06118	cluster 1	0.602354
cluster 1	1.09677	cluster 1	0.656679
cluster 1	1.06249	cluster 1	0.671094
cluster 1	1.11891	cluster 1	0.690768
cluster 1	1.10827	cluster 1	0.628501
cluster 1	1.12472	cluster 1	0.653406
cluster 1	1.20283	cluster 1	0.674467
cluster 1	0.968634	cluster 1	0.610537
cluster 1	1.06898	cluster 1	0.641421
cluster 1	1.06355	cluster 1	0.615075
cluster 1	1.1331	cluster 1	0.65833
cluster 1	1.04635	cluster 1	0.639044
cluster 1	1.15015	cluster 1	0.597494
cluster 1	1.10246	cluster 1	0.726336
cluster 1	1.20944	cluster 1	0.616945
cluster 1	1.13564	cluster 1	0.681694
cluster 1	0.982555	cluster 1	0.644526
cluster 1	1.14216	cluster 1	0.61442
cluster 1	1.12141	cluster 1	0.694574
cluster 1	1.06056	cluster 1	0.656901
cluster 1	1.06168	cluster 1	0.562861
cluster 1	1.01207	cluster 1	0.617429
cluster 1	1.09936	cluster 1	0.649806
cluster 1	1.11469	cluster 1	0.638068
cluster 1	1.03593	cluster 1	0.591453
cluster 1	1.07097	cluster 1	0.657948
cluster 1	1.21188	cluster 1	0.678235
cluster 1	0.938815	cluster 1	0.669841
cluster 1	1.06335	cluster 1	0.622613
cluster 1	1.08629	cluster 1	0.740429
cluster 1	1.12661	cluster 1	0.615579
cluster 1	1.20483	cluster 1	0.612497
cluster 1	1.00822	cluster 1	0.63543
cluster 1	1.16895	cluster 1	0.698855
cluster 1	1.09653	cluster 1	0.625296
cluster 1	0.916142	cluster 1	0.637784
cluster 1	1.00195	cluster 1	0.592739
cluster 1	1.13758	cluster 1	0.678949
cluster 1	1.0206	cluster 1	0.657697
cluster 1	1.04449	cluster 1	0.667154
cluster 1	1.04451	cluster 1	0.587831
cluster 1	1.16958	cluster 1	0.65457
cluster 1	0.935955	cluster 1	0.706675
cluster 1	1.08266	cluster 1	0.700202
cluster 1	1.07899	cluster 1	0.577939
cluster 1	1.13519	cluster 1	0.645855
cluster 1	1.07519	cluster 1	0.58364
cluster 1	1.18926	cluster 1	0.589346
cluster 1	1.15158	cluster 1	0.625151
cluster 1	1.20596	cluster 1	0.681677
cluster 1	1.0632	cluster 1	0.656428
cluster 1	1.03577	cluster 1	0.681984
cluster 1	1.03434	cluster 1	0.640414
cluster 1	1.07131	cluster 1	0.638677
cluster 1	1.11835	cluster 1	0.664139
cluster 1	1.14722	cluster 1	0.602734
cluster 1	0.951453	cluster 1	0.610647
cluster 1	1.06038	cluster 1	0.632129
cluster 1	1.19455	cluster 1	0.681639
cluster 1	1.09036	cluster 1	0.599744
cluster 1	1.01812	cluster 1	0.650047
cluster 1	1.1235	cluster 1	0.651265
cluster 1	1.079	cluster 1	0.590458
cluster 1	0.951926	cluster 1	0.645336
cluster 1	1.24617	cluster 1	0.672566
cluster 1	1.09651	cluster 1	0.675439
cluster 1	1.12136	cluster 1	0.692258
cluster 1	0.931825	cluster 1	0.618829
cluster 1	1.03878	cluster 1	0.633662
cluster 1	1.05753	cluster 1	0.683754
cluster 1	1.11641	cluster 1	0.596462
cluster 1	0.992023	cluster 1	0.593909
cluster 1	1.10042	cluster 1	0.682128
cluster 1	1.14648	cluster 1	0.619991
cluster 1	0.97745	cluster 1	0.619753
cluster 1	1.12556	cluster 1	0.599138
cluster 1	1.19496	cluster 1	0.745927
cluster 1	1.02914	cluster 1	0.631849
cluster 1	1.07974	cluster 1	0.73729
cluster 1	1.05252	cluster 1	0.557234
cluster 1	1.19094	cluster 1	0.607487
cluster 1	1.12168	cluster 1	0.626045
cluster 1	0.977798	cluster 1	0.680122
cluster 1	1.06127	cluster 1	0.696939
cluster 1	1.08356	cluster 1	0.599201
cluster 1	1.15734	cluster 1	0.605522
cluster 1	1.11243	cluster 1	0.58328
cluster 1	0.941747	cluster 1	0.643179
cluster 1	1.18097	cluster 1	0.601786
cluster 1	0.970687	cluster 1	0.589813
cluster 1	1.18499	cluster 1	0.66939
cluster 1	1.07135	cluster 1	0.555255
cluster 1	0.989029	cluster 1	0.66685
cluster 1	1.00247	cluster 1	0.595538
cluster 1	1.14918	cluster 1	0.611148
cluster 1	1.11782	cluster 1	0.593696
cluster 1	0.995027	cluster 1	0.685671
cluster 1	1.04462	cluster 1	0.631949
cluster 1	1.04664	cluster 1	0.653693
cluster 1	0.989625	cluster 1	0.602707
cluster 1	1.01828	cluster 1	0.537398
cluster 1	1.07799	cluster 1	0.556613
cluster 1	1.12276	cluster 1	0.664976
cluster 1	1.02838	cluster 1	0.593071
cluster 1	1.15254	cluster 1	0.602249
cluster 1	1.1023	cluster 1	0.617452
cluster 1	1.19186	cluster 1	0.711977
cluster 1	0.93968	cluster 1	0.557287
cluster 1	1.12008	cluster 1	0.583947
cluster 1	1.0357	cluster 1	0.590871
cluster 1	1.09887	cluster 1	0.566445
cluster 1	1.1444	cluster 1	0.64435
cluster 1	1.05914	cluster 1	0.573749
cluster 1	1.13299	cluster 1	0.580639
cluster 1	1.12832	cluster 1	0.649491
cluster 1	1.04443	cluster 1	0.65385
cluster 1	1.11577	cluster 1	0.625718
cluster 1	1.07205	cluster 1	0.551031
cluster 1	1.09637	cluster 1	0.662511
cluster 1	1.02436	cluster 1	0.664994
cluster 1	0.916456	cluster 1	0.730712
cluster 1	1.1112	cluster 1	0.626596
cluster 1	1.09988	cluster 1	0.673933
cluster 1	1.01725	cluster 1	0.721887
cluster 1	1.12883	cluster 1	0.606
cluster 1	1.1134	cluster 1	0.634653
cluster 1	1.12999	cluster 1	0.644885
cluster 1	1.0488	cluster 1	0.659222
cluster 1	1.12878	cluster 1	0.610847
cluster 1	1.13892	cluster 1	0.545588
cluster 1	1.09335	cluster 1	0.546403
cluster 1	0.982735	cluster 1	0.590394
cluster 1	1.20504	cluster 1	0.588486
cluster 1	1.00197	cluster 1	0.61861
cluster 1	0.986245	cluster 1	0.670086
cluster 1	1.07933	cluster 1	0.609902
cluster 1	1.01872	cluster 1	0.633473
cluster 1	1.15032	cluster 1	0.609458
cluster 1	1.10473	cluster 1	0.645487
cluster 1	1.21549	cluster 1	0.703259
cluster 1	1.04927	cluster 1	0.517512
cluster 1	1.02332	cluster 1	0.672102
cluster 1	1.12995	cluster 1	0.66219
cluster 1	0.964674	cluster 1	0.639861
cluster 1	1.1326	cluster 1	0.602854
cluster 1	1.04553	cluster 1	0.555139
cluster 1	1.08199	cluster 1	0.615397
cluster 1	1.10267	cluster 1	0.620867
cluster 1	1.05879	cluster 1	0.584726
cluster 1	1.12619	cluster 1	0.583942
cluster 1	1.1278	cluster 1	0.617694
cluster 1	1.05669	cluster 1	0.66337
cluster 1	1.13413	cluster 1	0.64316
cluster 1	1.05213	cluster 1	0.656827
cluster 1	1.18982	cluster 1	0.574605
cluster 1	1.14873	cluster 1	0.633891
cluster 1	1.11844	cluster 1	0.648662
cluster 1	1.0681	cluster 1	0.676818
cluster 1	1.06921	cluster 1	0.608388
cluster 1	1.11619	cluster 1	0.610706
cluster 1	0.951997	cluster 1	0.608614
cluster 1	1.05424	cluster 1	0.61897
cluster 1	1.27063	cluster 1	0.546176
cluster 1	1.17572	cluster 1	0.619809
cluster 1	1.02102	cluster 1	0.648497
cluster 1	1.0024	cluster 1	0.672678
cluster 1	1.11923	cluster 1	0.579224
cluster 1	1.08361	cluster 1	0.626877
cluster 1	1.08395	cluster 1	0.688023
cluster 1	1.13438	cluster 1	0.607506
cluster 1	0.982128	cluster 1	0.678768
cluster 1	1.03116	cluster 1	0.598733
cluster 1	1.18529	cluster 1	0.639381
cluster 1	1.20882	cluster 1	0.621504
cluster 1	1.14308	cluster 1	0.626227
cluster 1	1.15745	cluster 1	0.649871
cluster 1	1.13668	cluster 1	0.626941
cluster 1	0.976558	cluster 1	0.674382
cluster 1	1.05991	cluster 1	0.584523
cluster 1	1.15948	cluster 1	0.68469
cluster 1	1.05461	cluster 1	0.684966
cluster 1	1.03518	cluster 1	0.71139
cluster 1	1.04662	cluster 1	0.736887
cluster 1	0.948571	cluster 1	0.618035
cluster 1	1.09913	cluster 1	0.676455
cluster 1	1.21012	cluster 1	0.623614
cluster 1	1.21518	cluster 1	0.588681
cluster 1	1.19291	cluster 1	0.700334
cluster 1	1.14978	cluster 1	0.711556
cluster 1	1.03732	cluster 1	0.643978
cluster 1	1.17505	cluster 1	0.579596
cluster 1	1.12803	cluster 1	0.7056
cluster 1	1.08008	cluster 1	0.656305
cluster 1	1.12761	cluster 1	0.64498
cluster 1	0.950759	cluster 1	0.601513
cluster 1	1.11021	cluster 1	0.722429
cluster 1	1.03523	cluster 1	0.57737
cluster 1	1.07686	cluster 1	0.597033
cluster 1	1.12463	cluster 1	0.65625
cluster 1	0.981465	cluster 1	0.627948
cluster 1	0.998406	cluster 1	0.626251
cluster 1	1.13039	cluster 1	0.696518
cluster 1	1.08713	cluster 1	0.658976
cluster 1	1.21733	cluster 1	0.640314
cluster 1	1.16285	cluster 1	0.608424
cluster 1	1.06538	cluster 1	0.667304
cluster 1	1.05416	cluster 1	0.646059
cluster 1	1.09252	cluster 1	0.646732
cluster 1	1.06716	cluster 1	0.651227
cluster 1	1.00726	cluster 1	0.520011
cluster 1	1.10908	cluster 1	0.733035
cluster 1	1.04278	cluster 1	0.682645
cluster 1	1.12107	cluster 1	0.585518
cluster 1	1.08335	cluster 1	0.699429
cluster 1	1.13088	cluster 1	0.634729
cluster 1	1.13179	cluster 1	0.709772
cluster 1	1.14164	cluster 1	0.611707
cluster 1	0.998666	cluster 1	0.70701
cluster 1	1.09761	cluster 1	0.632376
cluster 1	1.10782	cluster 1	0.643541
cluster 1	1.14281	cluster 1	0.632093
cluster 1	1.03691	cluster 1	0.622657
cluster 1	0.92882	cluster 1	0.541116
cluster 1	1.04306	cluster 1	0.650204
cluster 1	1.06455	cluster 1	0.680874
cluster 1	1.03796	cluster 1	0.600601
cluster 1	1.04099	cluster 1	0.653259
cluster 1	1.05825	cluster 1	0.660775
cluster 1	1.13603	cluster 1	0.703129
cluster 1	1.08976	cluster 1	0.685096
cluster 1	1.05249	cluster 1	0.645617
cluster 1	0.990804	cluster 1	0.560565
cluster 1	1.12008	cluster 1	0.660393
cluster 1	1.07537	cluster 1	0.600935
cluster 1	1.09215	cluster 1	0.671943
cluster 1	0.995415	cluster 1	0.701957
cluster 1	1.06889	cluster 1	0.715938
cluster 1	1.08182	cluster 1	0.654635
cluster 1	1.07219	cluster 1	0.646043
cluster 1	1.00315	cluster 1	0.585001
cluster 1	1.12659	cluster 1	0.632766
cluster 1	1.16478	cluster 1	0.610199
cluster 1	0.982798	cluster 1	0.648222
cluster 1	1.01795	cluster 1	0.637885
cluster 1	1.04718	cluster 1	0.510362
cluster 1	1.18298	cluster 1	0.709308
cluster 1	1.04046	cluster 1	0.544715
cluster 1	1.17944	cluster 1	0.597797
cluster 1	0.964401	cluster 1	0.653033
cluster 1	1.03502	cluster 1	0.646976
cluster 1	0.968116	cluster 1	0.620712
cluster 1	1.02506	cluster 1	0.586853
cluster 1	1.08052	cluster 1	0.668438
cluster 1	1.05248	cluster 1	0.58806
cluster 1	1.23466	cluster 1	0.66381
cluster 1	1.08377	cluster 1	0.643312
cluster 1	0.956133	cluster 1	0.722165
cluster 1	1.07845	cluster 1	0.637079
cluster 1	0.9928	cluster 1	0.665562
cluster 1	1.12464	cluster 1	0.620779
cluster 1	0.97266	cluster 1	0.637854
cluster 1	0.84284	cluster 1	0.590897
cluster 1	1.02658	cluster 1	0.70799
cluster 1	1.18253	cluster 1	0.668327
cluster 1	0.981584	cluster 1	0.641897
cluster 1	1.00811	cluster 1	0.69326
cluster 1	1.17498	cluster 1	0.608783
cluster 1	1.07973	cluster 1	0.597127
cluster 1	1.05768	cluster 1	0.67144
cluster 1	1.07762	cluster 1	0.624006
cluster 1	1.01305	cluster 1	0.590891
cluster 1	1.00976	cluster 1	0.63771
cluster 1	1.02104	cluster 1	0.602115
cluster 1	1.13991	cluster 1	0.577807
cluster 1	1.10855	cluster 1	0.53383
cluster 1	1.02284	cluster 1	0.584007
cluster 1	1.13455	cluster 1	0.658361
cluster 1	1.04907	cluster 1	0.739869
cluster 1	1.15492	cluster 1	0.571932
cluster 1	1.07772	cluster 1	0.645055
cluster 1	1.13042	cluster 1	0.616832
cluster 1	1.14714	cluster 1	0.560389
cluster 1	0.960855	cluster 1	0.6494
cluster 1	1.08524	cluster 1	0.563439
cluster 1	1.16121	cluster 1	0.677976
cluster 1	1.1281	cluster 1	0.698073
cluster 1	1.11529	cluster 1	0.565915
cluster 1	1.06419	cluster 1	0.591172
cluster 1	1.00124	cluster 1	0.709395
cluster 1	1.04988	cluster 1	0.637779
cluster 1	1.04566	cluster 1	0.704606
cluster 1	1.0053	cluster 1	0.666453
cluster 1	1.11078	cluster 1	0.610093
cluster 1	1.0072	cluster 1	0.604984
cluster 1	1.1444	cluster 1	0.555071
cluster 1	1.11588	cluster 1	0.614299
cluster 1	1.08359	cluster 1	0.614541
cluster 1	1.06944	cluster 1	0.596678
cluster 1	0.914439	cluster 1	0.684086
cluster 1	1.05177	cluster 1	0.708539
cluster 1	1.0952	cluster 1	0.659234
cluster 1	1.09934	cluster 1	0.672915
cluster 1	1.01902	cluster 1	0.667636
cluster 1	1.12953	cluster 1	0.551122
cluster 1	1.12726	cluster 1	0.610837
cluster 1	0.976218	cluster 1	0.58113
cluster 1	1.08771	cluster 1	0.599749
cluster 1	1.12376	cluster 1	0.591139
cluster 1	1.11795	cluster 1	0.595416
cluster 1	1.04439	cluster 1	0.677886
cluster 1	1.06517	cluster 1	0.660491
cluster 1	1.11797	cluster 1	0.664848
cluster 1	1.04067	cluster 1	0.687004
cluster 1	0.997218	cluster 1	0.593688
cluster 1	1.05332	cluster 1	0.592861
cluster 1	1.16663	cluster 1	0.604856
cluster 1	1.16486	cluster 1	0.697973
cluster 1	1.04648	cluster 1	0.595191
cluster 1	0.966947	cluster 1	0.65804
cluster 1	1.03888	cluster 1	0.705174
cluster 1	1.04819	cluster 1	0.579968
cluster 1	1.0881	cluster 1	0.618409
cluster 1	1.02343	cluster 1	0.63108
cluster 1	1.04529	cluster 1	0.617221
cluster 1	1.05361	cluster 1	0.72972
cluster 1	1.09986	cluster 1	0.631342
cluster 1	1.09689	cluster 1	0.582755
cluster 1	1.12556	cluster 1	0.589578
cluster 1	1.08345	cluster 1	0.690297
cluster 1	0.935579	cluster 1	0.616122
cluster 1	1.05752	cluster 1	0.589482
cluster 1	0.973523	cluster 1	0.631156
cluster 1	1.03258	cluster 1	0.683057
cluster 1	1.09691	cluster 1	0.608074
cluster 1	1.01041	cluster 1	0.677384
cluster 1	0.977694	cluster 1	0.693362
cluster 1	1.00714	cluster 1	0.599642
cluster 1	1.04489	cluster 1	0.658152
cluster 1	1.09766	cluster 1	0.683544
cluster 1	1.10994	cluster 1	0.645156
cluster 1	1.10106	cluster 1	0.587814
cluster 1	0.915566	cluster 1	0.62013
cluster 1	0.930904	cluster 1	0.615341
cluster 1	1.0235	cluster 1	0.681352
cluster 1	1.1459	cluster 1	0.638418
cluster 1	1.17844	cluster 1	0.6135
cluster 1	1.22788	cluster 1	0.657234
cluster 1	1.09033	cluster 1	0.718293
cluster 1	1.16025	cluster 1	0.63755
cluster 1	1.11751	cluster 1	0.673911
cluster 1	1.04623	cluster 1	0.579696
cluster 1	1.05872	cluster 1	0.619004
cluster 1	1.14558	cluster 1	0.664464
cluster 1	1.09098	cluster 1	0.595817
cluster 2	0.747496	cluster 2	0.629568
cluster 2	0.72288	cluster 2	0.567615
cluster 2	0.727124	cluster 2	0.600989
cluster 2	0.725246	cluster 2	0.711807
cluster 2	0.757199	cluster 2	0.634029
cluster 2	0.661166	cluster 2	0.602145
cluster 2	0.715716	cluster 2	0.656192
cluster 2	0.665166	cluster 2	0.64533
cluster 2	0.711183	cluster 2	0.592228
cluster 2	0.670074	cluster 2	0.647302
cluster 2	0.746175	cluster 2	0.606267
cluster 2	0.714638	cluster 2	0.670985
cluster 2	0.736511	cluster 2	0.547635
cluster 2	0.696655	cluster 2	0.598506
cluster 2	0.737952	cluster 2	0.601467
cluster 2	0.719268	cluster 2	0.648758
cluster 2	0.720784	cluster 2	0.631154
cluster 2	0.756649	cluster 2	0.651365
cluster 2	0.676352	cluster 2	0.601075
cluster 2	0.758082	cluster 2	0.616398
cluster 2	0.611309	cluster 2	0.586606
cluster 2	0.753816	cluster 2	0.671263
cluster 2	0.730976	cluster 2	0.588046
cluster 2	0.729472	cluster 2	0.639191
cluster 2	0.755606	cluster 2	0.706601
cluster 2	0.687792	cluster 2	0.567942
cluster 2	0.756348	cluster 2	0.634026
cluster 2	0.593203	cluster 2	0.642195
cluster 2	0.748788	cluster 2	0.65621
cluster 2	0.724667	cluster 2	0.630074
cluster 2	0.714846	cluster 2	0.587159
cluster 2	0.771021	cluster 2	0.652618
cluster 2	0.741988	cluster 2	0.678328
cluster 2	0.622714	cluster 2	0.671452
cluster 2	0.788894	cluster 2	0.649236
cluster 2	0.812093	cluster 2	0.633368
cluster 2	0.784112	cluster 2	0.558157
cluster 2	0.739248	cluster 2	0.580364
cluster 2	0.752854	cluster 2	0.654151
cluster 2	0.856945	cluster 2	0.688605
cluster 2	0.665725	cluster 2	0.708678
cluster 2	0.701821	cluster 2	0.6863
cluster 2	0.729199	cluster 2	0.580923
cluster 2	0.751958	cluster 2	0.592883
cluster 2	0.807959	cluster 2	0.64722
cluster 2	0.824912	cluster 2	0.602511
cluster 2	0.769204	cluster 2	0.647538
cluster 2	0.721289	cluster 2	0.593772
cluster 2	0.745231	cluster 2	0.547747
cluster 2	0.789913	cluster 2	0.708409
cluster 2	0.764869	cluster 2	0.61954
cluster 2	0.737731	cluster 2	0.618619
cluster 2	0.70869	cluster 2	0.564369
cluster 2	0.719673	cluster 2	0.676453
cluster 2	0.731626	cluster 2	0.615149
cluster 2	0.810205	cluster 2	0.607907
cluster 2	0.777973	cluster 2	0.594284
cluster 2	0.689805	cluster 2	0.627599
cluster 2	0.777445	cluster 2	0.641732
cluster 2	0.761687	cluster 2	0.599354
cluster 2	0.764987	cluster 2	0.571994
cluster 2	0.716888	cluster 2	0.630848
cluster 2	0.815871	cluster 2	0.605211
cluster 2	0.730428	cluster 2	0.690559
cluster 2	0.680591	cluster 2	0.60959
cluster 2	0.836275	cluster 2	0.638695
cluster 2	0.658984	cluster 2	0.654085
cluster 2	0.678144	cluster 2	0.638791
cluster 2	0.619198	cluster 2	0.617712
cluster 2	0.695955	cluster 2	0.610504
cluster 2	0.7054	cluster 2	0.73504
cluster 2	0.787246	cluster 2	0.599336
cluster 2	0.633426	cluster 2	0.579218
cluster 2	0.721409	cluster 2	0.69123
cluster 2	0.660755	cluster 2	0.71276
cluster 2	0.751561	cluster 2	0.59651
cluster 2	0.743529	cluster 2	0.652099
cluster 2	0.701046	cluster 2	0.584631
cluster 2	0.629371	cluster 2	0.603199
cluster 2	0.663116	cluster 2	0.646614
cluster 2	0.758065	cluster 2	0.585181
cluster 2	0.788126	cluster 2	0.599535
cluster 2	0.794645	cluster 2	0.617345
cluster 2	0.729804	cluster 2	0.675994
cluster 2	0.610192	cluster 2	0.566249
cluster 2	0.7037	cluster 2	0.570268
cluster 2	0.673898	cluster 2	0.598636
cluster 2	0.624244	cluster 2	0.593896
cluster 2	0.62643	cluster 2	0.519146
cluster 2	0.739664	cluster 2	0.637501
cluster 2	0.741748	cluster 2	0.705843
cluster 2	0.839944	cluster 2	0.631773
cluster 2	0.728921	cluster 2	0.681261
cluster 2	0.728151	cluster 2	0.630469
cluster 2	0.806097	cluster 2	0.656801
cluster 2	0.789365	cluster 2	0.597676
cluster 2	0.696747	cluster 2	0.571369
cluster 2	0.719307	cluster 2	0.614428
cluster 2	0.723336	cluster 2	0.649628
cluster 2	0.654632	cluster 2	0.647316
cluster 2	0.658871	cluster 2	0.663872
cluster 2	0.715187	cluster 2	0.570072
cluster 2	0.783685	cluster 2	0.609507
cluster 2	0.713852	cluster 2	0.583804
cluster 2	0.695472	cluster 2	0.579424
cluster 2	0.677753	cluster 2	0.634
cluster 2	0.628267	cluster 2	0.573261
cluster 2	0.734224	cluster 2	0.637931
cluster 2	0.751058	cluster 2	0.649217
cluster 2	0.717812	cluster 2	0.537368
cluster 2	0.804768	cluster 2	0.59837
cluster 2	0.7326	cluster 2	0.707821
cluster 2	0.750718	cluster 2	0.634813
cluster 2	0.692057	cluster 2	0.620507
cluster 2	0.773991	cluster 2	0.683344
cluster 2	0.774669	cluster 2	0.641914
cluster 2	0.74407	cluster 2	0.562155
cluster 2	0.722586	cluster 2	0.68797
cluster 2	0.667486	cluster 2	0.604721
cluster 2	0.681462	cluster 2	0.703801
cluster 2	0.724623	cluster 2	0.56787
cluster 2	0.765563	cluster 2	0.584476
cluster 2	0.688359	cluster 2	0.600156
cluster 2	0.787433	cluster 2	0.774351
cluster 2	0.603702	cluster 2	0.62113
cluster 2	0.753078	cluster 2	0.650139
cluster 2	0.725737	cluster 2	0.69083
cluster 2	0.755998	cluster 2	0.621668
cluster 2	0.751494	cluster 2	0.619562
cluster 2	0.70043	cluster 2	0.527818
cluster 2	0.714976	cluster 2	0.592527
cluster 2	0.708876	cluster 2	0.634252
cluster 2	0.747268	cluster 2	0.638185
cluster 2	0.807258	cluster 2	0.567723
cluster 2	0.720879	cluster 2	0.631517
cluster 2	0.65908	cluster 2	0.626965
cluster 2	0.817363	cluster 2	0.701918
cluster 2	0.648415	cluster 2	0.644977
cluster 2	0.726593	cluster 2	0.563196
cluster 2	0.698126	cluster 2	0.61663
cluster 2	0.717757	cluster 2	0.623169
cluster 2	0.701778	cluster 2	0.569218
cluster 2	0.674976	cluster 2	0.624356
cluster 2	0.663338	cluster 2	0.696476
cluster 2	0.735464	cluster 2	0.537669
cluster 2	0.691527	cluster 2	0.510746
cluster 2	0.704213	cluster 2	0.597134
cluster 2	0.721304	cluster 2	0.538778
cluster 2	0.71544	cluster 2	0.648815
cluster 2	0.644254	cluster 2	0.638552
cluster 2	0.707996	cluster 2	0.562226
cluster 2	0.722027	cluster 2	0.625412
cluster 2	0.65303	cluster 2	0.640254
cluster 2	0.72053	cluster 2	0.578357
cluster 2	0.748825	cluster 2	0.618858
cluster 2	0.756027	cluster 2	0.613303
cluster 2	0.699206	cluster 2	0.557335
cluster 2	0.762788	cluster 2	0.592318
cluster 2	0.724629	cluster 2	0.698561
cluster 2	0.764734	cluster 2	0.650753
cluster 2	0.756087	cluster 2	0.580975
cluster 2	0.691449	cluster 2	0.664253
cluster 2	0.73218	cluster 2	0.611118
cluster 2	0.757084	cluster 2	0.60915
cluster 2	0.69386	cluster 2	0.576956
cluster 2	0.684211	cluster 2	0.603682
cluster 2	0.706277	cluster 2	0.674791
cluster 2	0.659525	cluster 2	0.688048
cluster 2	0.682126	cluster 2	0.66663
cluster 2	0.705468	cluster 2	0.643029
cluster 2	0.771066	cluster 2	0.684485
cluster 2	0.715807	cluster 2	0.593038
cluster 2	0.722591	cluster 2	0.611971
cluster 2	0.775354	cluster 2	0.602694
cluster 2	0.684996	cluster 2	0.573313
cluster 2	0.691896	cluster 2	0.551371
cluster 2	0.661036	cluster 2	0.578399
cluster 2	0.752092	cluster 2	0.561602
cluster 2	0.73511	cluster 2	0.563229
cluster 2	0.798215	cluster 2	0.6353
cluster 2	0.738622	cluster 2	0.591992
cluster 2	0.770087	cluster 2	0.545971
cluster 2	0.7346	cluster 2	0.655211
cluster 2	0.777182	cluster 2	0.599076
cluster 2	0.704833	cluster 2	0.610884
cluster 2	0.722207	cluster 2	0.599295
cluster 2	0.715573	cluster 2	0.637289
cluster 2	0.737025	cluster 2	0.59043
cluster 2	0.73878	cluster 2	0.569536
cluster 2	0.771388	cluster 2	0.646318
cluster 2	0.65529	cluster 2	0.739779
cluster 2	0.763212	cluster 2	0.600527
cluster 2	0.746708	cluster 2	0.663962
cluster 2	0.613193	cluster 2	0.615197
cluster 2	0.727192	cluster 2	0.593921
cluster 2	0.765982	cluster 2	0.722551
cluster 2	0.757492	cluster 2	0.637375
cluster 2	0.664084	cluster 2	0.640618
cluster 2	0.726386	cluster 2	0.696907
cluster 2	0.665594	cluster 2	0.722403
cluster 2	0.700682	cluster 2	0.676381
cluster 2	0.659359	cluster 2	0.635723
cluster 2	0.723973	cluster 2	0.679443
cluster 2	0.812747	cluster 2	0.744843
cluster 2	0.734315	cluster 2	0.615363
cluster 2	0.671262	cluster 2	0.536254
cluster 2	0.649127	cluster 2	0.693706
cluster 2	0.697035	cluster 2	0.633
cluster 2	0.760138	cluster 2	0.616927
cluster 2	0.656096	cluster 2	0.618197
cluster 2	0.755172	cluster 2	0.650903
cluster 2	0.620596	cluster 2	0.656488
cluster 2	0.774684	cluster 2	0.583363
cluster 2	0.694182	cluster 2	0.655066
cluster 2	0.762132	cluster 2	0.640163
cluster 2	0.797507	cluster 2	0.671717
cluster 2	0.703832	cluster 2	0.64959
cluster 2	0.559863	cluster 2	0.636976
cluster 2	0.679659	cluster 2	0.613029
cluster 2	0.748582	cluster 2	0.627331
cluster 2	0.738929	cluster 2	0.581036
cluster 2	0.704214	cluster 2	0.58376
cluster 2	0.683226	cluster 2	0.700888
cluster 2	0.743939	cluster 2	0.612031
cluster 2	0.827838	cluster 2	0.5768
cluster 2	0.738764	cluster 2	0.714589
cluster 2	0.710125	cluster 2	0.620887
cluster 2	0.726367	cluster 2	0.667851
cluster 2	0.741019	cluster 2	0.573362
cluster 2	0.659714	cluster 2	0.610112
cluster 2	0.782606	cluster 2	0.641082
cluster 2	0.728025	cluster 2	0.684114
cluster 2	0.765921	cluster 2	0.674704
cluster 2	0.645831	cluster 2	0.526053
cluster 2	0.682153	cluster 2	0.546704
cluster 2	0.735864	cluster 2	0.694446
cluster 2	0.739125	cluster 2	0.597636
cluster 2	0.746846	cluster 2	0.60815
cluster 2	0.729484	cluster 2	0.591325
cluster 2	0.767149	cluster 2	0.57661
cluster 2	0.621901	cluster 2	0.674479
cluster 2	0.83714	cluster 2	0.625899
cluster 2	0.786632	cluster 2	0.571022
cluster 2	0.716474	cluster 2	0.668066
cluster 2	0.707933	cluster 2	0.641695
cluster 2	0.759139	cluster 2	0.60533
cluster 2	0.750773	cluster 2	0.600061
cluster 2	0.739531	cluster 2	0.614996
cluster 2	0.70041	cluster 2	0.648341
cluster 2	0.622525	cluster 2	0.64171
cluster 2	0.752704	cluster 2	0.576126
cluster 2	0.740732	cluster 2	0.642825
cluster 2	0.789624	cluster 2	0.672569
cluster 2	0.761132	cluster 2	0.653073
cluster 2	0.731636	cluster 2	0.62706
cluster 2	0.823328	cluster 2	0.661935
cluster 2	0.718447	cluster 2	0.590306
cluster 2	0.68069	cluster 2	0.647098
cluster 2	0.593654	cluster 2	0.535785
cluster 2	0.763635	cluster 2	0.557104
cluster 2	0.676843	cluster 2	0.636085
cluster 2	0.707599	cluster 2	0.598102
cluster 2	0.728558	cluster 2	0.648724
cluster 2	0.63734	cluster 2	0.676575
cluster 2	0.726834	cluster 2	0.657183
cluster 2	0.772948	cluster 2	0.549886
cluster 2	0.73216	cluster 2	0.661059
cluster 2	0.729102	cluster 2	0.637988
cluster 2	0.763993	cluster 2	0.591155
cluster 2	0.732522	cluster 2	0.669688
cluster 2	0.729756	cluster 2	0.731412
cluster 2	0.769512	cluster 2	0.686287
cluster 2	0.752064	cluster 2	0.710816
cluster 2	0.733971	cluster 2	0.567971
cluster 2	0.752684	cluster 2	0.546003
cluster 2	0.644961	cluster 2	0.605431
cluster 2	0.750238	cluster 2	0.577054
cluster 2	0.696775	cluster 2	0.696112
cluster 2	0.799579	cluster 2	0.644409
cluster 2	0.684996	cluster 2	0.655245
cluster 2	0.727413	cluster 2	0.5889
cluster 2	0.697683	cluster 2	0.653944
cluster 2	0.683185	cluster 2	0.634683
cluster 2	0.730992	cluster 2	0.737037
cluster 2	0.709419	cluster 2	0.595727
cluster 2	0.783115	cluster 2	0.66006
cluster 2	0.711857	cluster 2	0.643654
cluster 2	0.677134	cluster 2	0.635566
cluster 2	0.80745	cluster 2	0.555537
cluster 2	0.743003	cluster 2	0.676131
cluster 2	0.740757	cluster 2	0.590772
cluster 2	0.742046	cluster 2	0.611239
cluster 2	0.770691	cluster 2	0.633113
cluster 2	0.726277	cluster 2	0.562028
cluster 2	0.710655	cluster 2	0.622614
cluster 2	0.748678	cluster 2	0.69983
cluster 2	0.761904	cluster 2	0.641918
cluster 2	0.6793	cluster 2	0.686973
cluster 2	0.716216	cluster 2	0.607504
cluster 2	0.680986	cluster 2	0.616626
cluster 2	0.722635	cluster 2	0.641338
cluster 2	0.719872	cluster 2	0.644741
cluster 2	0.6741	cluster 2	0.602477
cluster 2	0.733306	cluster 2	0.577882
cluster 2	0.642999	cluster 2	0.585841
cluster 2	0.743428	cluster 2	0.612919
cluster 2	0.617021	cluster 2	0.605435
cluster 2	0.770253	cluster 2	0.612108
cluster 2	0.773592	cluster 2	0.641379
cluster 2	0.771124	cluster 2	0.619131
cluster 2	0.755859	cluster 2	0.667978
cluster 2	0.788984	cluster 2	0.667728
cluster 2	0.707761	cluster 2	0.642841
cluster 2	0.708753	cluster 2	0.690717
cluster 2	0.777893	cluster 2	0.564774
cluster 2	0.656032	cluster 2	0.620798
cluster 2	0.749567	cluster 2	0.571731
cluster 2	0.701961	cluster 2	0.552846
cluster 2	0.688965	cluster 2	0.616781
cluster 2	0.717172	cluster 2	0.629606
cluster 2	0.604654	cluster 2	0.62094
cluster 2	0.74996	cluster 2	0.654175
cluster 2	0.71557	cluster 2	0.61647
cluster 2	0.726028	cluster 2	0.638857
cluster 2	0.774441	cluster 2	0.579891
cluster 2	0.686262	cluster 2	0.668307
cluster 2	0.736351	cluster 2	0.618069
cluster 2	0.719704	cluster 2	0.620935
cluster 2	0.662499	cluster 2	0.653363
cluster 2	0.835248	cluster 2	0.655906
cluster 2	0.66746	cluster 2	0.628347
cluster 2	0.710024	cluster 2	0.639725
cluster 2	0.714607	cluster 2	0.695204
cluster 2	0.689495	cluster 2	0.662419
cluster 2	0.771722	cluster 2	0.621494
cluster 2	0.745591	cluster 2	0.646119
cluster 2	0.666474	cluster 2	0.600465
cluster 2	0.699617	cluster 2	0.658597
cluster 2	0.64077	cluster 2	0.706904
cluster 2	0.722472	cluster 2	0.656177
cluster 2	0.670573	cluster 2	0.56489
cluster 2	0.63495	cluster 2	0.629154
cluster 2	0.710988	cluster 2	0.651199
cluster 2	0.771343	cluster 2	0.578338
cluster 2	0.817727	cluster 2	0.696394
cluster 2	0.67038	cluster 2	0.629553
cluster 2	0.784112	cluster 2	0.600092
cluster 2	0.752177	cluster 2	0.556922
cluster 2	0.719554	cluster 2	0.551476
cluster 2	0.663291	cluster 2	0.583369
cluster 2	0.725957	cluster 2	0.534691
cluster 2	0.757347	cluster 2	0.614401
cluster 2	0.739565	cluster 2	0.540408
cluster 2	0.738731	cluster 2	0.584063
cluster 2	0.700782	cluster 2	0.557209
cluster 2	0.66492	cluster 2	0.634995
cluster 2	0.718789	cluster 2	0.677534
cluster 2	0.745664	cluster 2	0.68546
cluster 2	0.770828	cluster 2	0.562322
cluster 2	0.770803	cluster 2	0.574274
cluster 2	0.659992	cluster 2	0.638805
cluster 2	0.721485	cluster 2	0.700168
cluster 2	0.698938	cluster 2	0.626917
cluster 2	0.757513	cluster 2	0.537461
cluster 2	0.696202	cluster 2	0.56917
cluster 2	0.694658	cluster 2	0.577639
cluster 2	0.807068	cluster 2	0.588537
cluster 2	0.657566	cluster 2	0.625935
cluster 2	0.751915	cluster 2	0.526121
cluster 2	0.684108	cluster 2	0.559277
cluster 2	0.654568	cluster 2	0.576248
cluster 2	0.771752	cluster 2	0.605443
cluster 2	0.616713	cluster 2	0.630801
cluster 2	0.648023	cluster 2	0.648229
cluster 2	0.793678	cluster 2	0.571996
cluster 2	0.713979	cluster 2	0.661067
cluster 2	0.72653	cluster 2	0.686921
cluster 2	0.744561	cluster 2	0.58937
cluster 2	0.741183	cluster 2	0.561258
cluster 2	0.732574	cluster 2	0.586221
cluster 2	0.730805	cluster 2	0.625005
cluster 2	0.707118	cluster 2	0.632921
cluster 2	0.77637	cluster 2	0.637425
cluster 2	0.741853	cluster 2	0.69539
cluster 2	0.703501	cluster 2	0.593745
cluster 2	0.714751	cluster 2	0.5459
cluster 2	0.687943	cluster 2	0.549274
cluster 2	0.725811	cluster 2	0.586128
cluster 2	0.680899	cluster 2	0.675412
cluster 2	0.734236	cluster 2	0.594184
cluster 2	0.78801	cluster 2	0.614733
cluster 2	0.747165	cluster 2	0.693656
cluster 2	0.814666	cluster 2	0.684377
cluster 2	0.706222	cluster 2	0.59603
cluster 2	0.78649	cluster 2	0.612721
cluster 2	0.757652	cluster 2	0.592617
cluster 2	0.72653	cluster 2	0.63328
cluster 2	0.74461	cluster 2	0.580573
cluster 2	0.813186	cluster 2	0.662909
cluster 2	0.614192	cluster 2	0.528383
cluster 2	0.820341	cluster 2	0.612521
cluster 2	0.600655	cluster 2	0.597198
cluster 2	0.734008	cluster 2	0.529366
cluster 2	0.684075	cluster 2	0.622501
cluster 2	0.793243	cluster 2	0.639738
cluster 2	0.746145	cluster 2	0.58636
cluster 2	0.63417	cluster 2	0.656165
cluster 2	0.676337	cluster 2	0.670723
cluster 2	0.749944	cluster 2	0.698807
cluster 2	0.749016	cluster 2	0.595565
cluster 2	0.676092	cluster 2	0.604461
cluster 2	0.784199	cluster 2	0.636418
cluster 2	0.760188	cluster 2	0.681469
cluster 2	0.794164	cluster 2	0.587246
cluster 2	0.660832	cluster 2	0.665227
cluster 2	0.738836	cluster 2	0.616787
cluster 2	0.772082	cluster 2	0.631505
cluster 2	0.686191	cluster 2	0.612639
cluster 2	0.72866	cluster 2	0.602013
cluster 2	0.808078	cluster 2	0.655695
cluster 2	0.689036	cluster 2	0.58661
cluster 2	0.643168	cluster 2	0.658117
cluster 2	0.711819	cluster 2	0.627841
cluster 2	0.706418	cluster 2	0.617426
cluster 2	0.703081	cluster 2	0.60056
cluster 2	0.787518	cluster 2	0.633609
cluster 2	0.821459	cluster 2	0.628306
cluster 2	0.823755	cluster 2	0.651725
cluster 2	0.774258	cluster 2	0.691469
cluster 2	0.724543	cluster 2	0.637524
cluster 2	0.754223	cluster 2	0.626086
cluster 2	0.756546	cluster 2	0.578108
cluster 2	0.755036	cluster 2	0.630791
cluster 2	0.596145	cluster 2	0.692276
cluster 2	0.65496	cluster 2	0.634292
cluster 2	0.707136	cluster 2	0.675435
cluster 2	0.783029	cluster 2	0.61758
cluster 2	0.77794	cluster 2	0.655184
cluster 2	0.669369	cluster 2	0.634664
cluster 2	0.733404	cluster 2	0.651843
cluster 2	0.708799	cluster 2	0.621424
cluster 2	0.728384	cluster 2	0.717235
cluster 2	0.726815	cluster 2	0.615654
cluster 2	0.772258	cluster 2	0.691555
cluster 2	0.747125	cluster 2	0.589497
cluster 2	0.764002	cluster 2	0.712071
cluster 2	0.715857	cluster 2	0.633629
cluster 2	0.785307	cluster 2	0.683279
cluster 2	0.719665	cluster 2	0.598471
cluster 2	0.691859	cluster 2	0.557391
cluster 2	0.713234	cluster 2	0.640091
cluster 2	0.620696	cluster 2	0.611984
cluster 2	0.712192	cluster 2	0.551749
cluster 2	0.715155	cluster 2	0.561695
cluster 2	0.768061	cluster 2	0.642076
cluster 2	0.693941	cluster 2	0.581344
cluster 2	0.777069	cluster 2	0.539447
cluster 2	0.601939	cluster 2	0.694956
cluster 2	0.648652	cluster 2	0.68373
cluster 2	0.721933	cluster 2	0.585408
cluster 2	0.753801	cluster 2	0.541466
cluster 2	0.73242	cluster 2	0.622907
cluster 2	0.705471	cluster 2	0.664396
cluster 2	0.765898	cluster 2	0.598884
cluster 2	0.715504	cluster 2	0.645761
cluster 2	0.679004	cluster 2	0.596985
cluster 2	0.721738	cluster 2	0.638189
cluster 2	0.705	cluster 2	0.666969
cluster 2	0.7527	cluster 2	0.569643
cluster 2	0.659907	cluster 2	0.685952
cluster 2	0.763308	cluster 2	0.639865
cluster 2	0.689584	cluster 2	0.665445
cluster 2	0.735129	cluster 2	0.574023
cluster 2	0.684108	cluster 2	0.676562
cluster 2	0.743673	cluster 2	0.639196
cluster 2	0.677372	cluster 2	0.633584
cluster 2	0.698728	cluster 2	0.687845
cluster 2	0.79749	cluster 2	0.547039
cluster 2	0.64928	cluster 2	0.62951
cluster 2	0.655408	cluster 2	0.672366
cluster 2	0.66189	cluster 2	0.597679
cluster 2	0.667207	cluster 2	0.656245
cluster 2	0.736972	cluster 2	0.587474
cluster 2	0.547067	cluster 2	0.626508
cluster 2	0.784864	cluster 2	0.577212
cluster 2	0.712684	cluster 2	0.668116
cluster 2	0.820454	cluster 2	0.626249
cluster 2	0.771916	cluster 2	0.650405
cluster 2	0.730253	cluster 2	0.573007
cluster 2	0.816123	cluster 2	0.576852
cluster 2	0.729492	cluster 2	0.58383
cluster 2	0.69738	cluster 2	0.597713
cluster 2	0.652182	cluster 2	0.652245
cluster 2	0.705961	cluster 2	0.619781
cluster 2	0.691275	cluster 2	0.656917
cluster 2	0.707139	cluster 2	0.65864
cluster 2	0.733342	cluster 2	0.613634
cluster 2	0.651257	cluster 2	0.653485
cluster 2	0.667886	cluster 2	0.646134
cluster 2	0.744725	cluster 2	0.651096
cluster 2	0.753067	cluster 2	0.596217
cluster 2	0.735034	cluster 2	0.570021
cluster 2	0.689621	cluster 2	0.586878
cluster 2	0.688279	cluster 2	0.700535
cluster 2	0.607947	cluster 2	0.678515
cluster 2	0.694241	cluster 2	0.623255
cluster 2	0.584374	cluster 2	0.609171
cluster 2	0.761059	cluster 2	0.606598
cluster 2	0.787682	cluster 2	0.634689
cluster 2	0.71501	cluster 2	0.586609
cluster 2	0.65699	cluster 2	0.605989
cluster 2	0.689876	cluster 2	0.593657
cluster 2	0.633952	cluster 2	0.548022
cluster 2	0.66667	cluster 2	0.630144
cluster 2	0.634298	cluster 2	0.63911
cluster 2	0.836654	cluster 2	0.699764
cluster 2	0.751313	cluster 2	0.632921
cluster 2	0.700937	cluster 2	0.631197
cluster 2	0.728124	cluster 2	0.571608
cluster 2	0.69248	cluster 2	0.61207
cluster 2	0.636064	cluster 2	0.643903
cluster 2	0.715609	cluster 2	0.603252
cluster 2	0.715932	cluster 2	0.577716
cluster 2	0.687318	cluster 2	0.588161
cluster 2	0.737431	cluster 2	0.57103
cluster 2	0.590901	cluster 2	0.634845
cluster 2	0.717216	cluster 2	0.587262
cluster 2	0.807656	cluster 2	0.702546
cluster 2	0.691241	cluster 2	0.715356
cluster 2	0.722394	cluster 2	0.61085
cluster 2	0.721572	cluster 2	0.583404
cluster 2	0.731194	cluster 2	0.597658
cluster 2	0.68832	cluster 2	0.663994
cluster 2	0.699237	cluster 2	0.709254
cluster 2	0.74644	cluster 2	0.66372
cluster 2	0.77164	cluster 2	0.535567
cluster 2	0.729973	cluster 2	0.659425
cluster 2	0.719358	cluster 2	0.663898
cluster 2	0.752205	cluster 2	0.575581
cluster 2	0.703016	cluster 2	0.623684
cluster 2	0.783398	cluster 2	0.661767
cluster 2	0.75614	cluster 2	0.635982
cluster 2	0.72262	cluster 2	0.604264
cluster 2	0.709001	cluster 2	0.642808
cluster 2	0.701209	cluster 2	0.661779
cluster 2	0.785698	cluster 2	0.546108
cluster 2	0.724739	cluster 2	0.576351
cluster 2	0.725678	cluster 2	0.593363
cluster 2	0.679575	cluster 2	0.628733
cluster 2	0.801854	cluster 2	0.702288
cluster 2	0.752397	cluster 2	0.667242
cluster 2	0.748862	cluster 2	0.604716
cluster 2	0.754341	cluster 2	0.658415
cluster 2	0.710586	cluster 2	0.585325
cluster 2	0.790303	cluster 2	0.65283
cluster 2	0.704346	cluster 2	0.622902
cluster 2	0.711406	cluster 2	0.564067
cluster 2	0.718377	cluster 2	0.683724
cluster 2	0.717126	cluster 2	0.628745
cluster 2	0.795582	cluster 2	0.699979
cluster 2	0.774259	cluster 2	0.605545
cluster 2	0.740512	cluster 2	0.631721
cluster 2	0.765337	cluster 2	0.526882
cluster 2	0.685781	cluster 2	0.73083
cluster 2	0.756269	cluster 2	0.604373
cluster 2	0.766531	cluster 2	0.579168
cluster 2	0.75445	cluster 2	0.669748
cluster 2	0.795226	cluster 2	0.594084
cluster 2	0.722588	cluster 2	0.68727
cluster 2	0.72487	cluster 2	0.580451
cluster 2	0.741641	cluster 2	0.610566
cluster 2	0.71574	cluster 2	0.565639
cluster 2	0.823201	cluster 2	0.714458
cluster 2	0.693241	cluster 2	0.632512
cluster 2	0.718326	cluster 2	0.629644
cluster 2	0.707209	cluster 2	0.649589
cluster 2	0.761209	cluster 2	0.585104
cluster 2	0.691926	cluster 2	0.571878
cluster 2	0.72224	cluster 2	0.645626
cluster 2	0.695949	cluster 2	0.596188
cluster 2	0.671849	cluster 2	0.63445
cluster 2	0.711607	cluster 2	0.764318
cluster 2	0.620824	cluster 2	0.607271
cluster 2	0.610561	cluster 2	0.632562
cluster 2	0.666428	cluster 2	0.679733
cluster 2	0.738851	cluster 2	0.577116
cluster 2	0.780464	cluster 2	0.618667
cluster 2	0.81347	cluster 2	0.539099
cluster 2	0.765773	cluster 2	0.737493
cluster 2	0.773579	cluster 2	0.680881
cluster 2	0.639046	cluster 2	0.546923
cluster 2	0.69971	cluster 2	0.602288
cluster 2	0.710067	cluster 2	0.593939
cluster 2	0.739893	cluster 2	0.625707
cluster 2	0.62629	cluster 2	0.616232
cluster 2	0.690287	cluster 2	0.574078
cluster 2	0.681093	cluster 2	0.669006
cluster 2	0.657864	cluster 2	0.623945
cluster 2	0.742587	cluster 2	0.647965
cluster 2	0.740202	cluster 2	0.609437
cluster 2	0.762157	cluster 2	0.571002
cluster 2	0.71186	cluster 2	0.625767
cluster 2	0.725079	cluster 2	0.596935
cluster 2	0.69751	cluster 2	0.644099
cluster 2	0.660672	cluster 2	0.67726
cluster 2	0.721549	cluster 2	0.533318
cluster 2	0.676231	cluster 2	0.624296
cluster 2	0.66231	cluster 2	0.610826
cluster 2	0.740528	cluster 2	0.636568
cluster 2	0.740755	cluster 2	0.635706
cluster 2	0.725098	cluster 2	0.629102
cluster 2	0.759405	cluster 2	0.611106
cluster 2	0.727348	cluster 2	0.63396
cluster 2	0.67713	cluster 2	0.611473
cluster 2	0.752801	cluster 2	0.70196
cluster 2	0.670163	cluster 2	0.63375
cluster 2	0.706319	cluster 2	0.59243
cluster 2	0.63865	cluster 2	0.584096
cluster 2	0.66006	cluster 2	0.656581
cluster 2	0.728024	cluster 2	0.605626
cluster 2	0.747579	cluster 2	0.604293
cluster 2	0.61664	cluster 2	0.627525
cluster 2	0.646684	cluster 2	0.614544
cluster 2	0.766986	cluster 2	0.724463
cluster 2	0.742947	cluster 2	0.594884
cluster 2	0.682244	cluster 2	0.584743
cluster 2	0.703466	cluster 2	0.598711
cluster 2	0.764512	cluster 2	0.639097
cluster 2	0.634176	cluster 2	0.588306
cluster 2	0.759785	cluster 2	0.609417
cluster 2	0.742135	cluster 2	0.573948
cluster 2	0.744545	cluster 2	0.624549
cluster 2	0.745778	cluster 2	0.580904
cluster 2	0.597754	cluster 2	0.683788
cluster 2	0.751255	cluster 2	0.597814
cluster 2	0.713691	cluster 2	0.699947
cluster 2	0.773378	cluster 2	0.694003
cluster 2	0.634025	cluster 2	0.6363
cluster 2	0.729032	cluster 2	0.62542
cluster 2	0.704554	cluster 2	0.617775
cluster 2	0.813098	cluster 2	0.562108
cluster 2	0.739908	cluster 2	0.629773
cluster 2	0.806235	cluster 2	0.597986
cluster 2	0.733036	cluster 2	0.573412
cluster 2	0.756294	cluster 2	0.624993
cluster 2	0.750483	cluster 2	0.622746
cluster 2	0.710771	cluster 2	0.660501
cluster 2	0.798464	cluster 2	0.598463
cluster 2	0.689464	cluster 2	0.551241
cluster 2	0.695302	cluster 2	0.570024
cluster 2	0.72449	cluster 2	0.589859
cluster 2	0.775367	cluster 2	0.63469
cluster 2	0.67965	cluster 2	0.548055
cluster 2	0.679881	cluster 2	0.686667
cluster 2	0.690957	cluster 2	0.525298
cluster 2	0.684417	cluster 2	0.627515
cluster 2	0.714627	cluster 2	0.634626
cluster 2	0.779923	cluster 2	0.661033
cluster 2	0.716348	cluster 2	0.638224
cluster 2	0.716789	cluster 2	0.611729
cluster 2	0.720617	cluster 2	0.657287
cluster 2	0.764712	cluster 2	0.62524
cluster 2	0.793525	cluster 2	0.711961
cluster 2	0.755856	cluster 2	0.633308
cluster 2	0.745781	cluster 2	0.618898
cluster 2	0.773963	cluster 2	0.591471
cluster 2	0.645783	cluster 2	0.654424
cluster 2	0.734391	cluster 2	0.535488
cluster 2	0.784967	cluster 2	0.606003
cluster 2	0.756469	cluster 2	0.592066
cluster 2	0.699368	cluster 2	0.697842
cluster 2	0.746023	cluster 2	0.639328
cluster 2	0.706202	cluster 2	0.621116
cluster 2	0.715385	cluster 2	0.595759
cluster 2	0.700563	cluster 2	0.631529
cluster 2	0.740726	cluster 2	0.550362
cluster 2	0.657266	cluster 2	0.53003
cluster 2	0.735538	cluster 2	0.629394
cluster 2	0.732693	cluster 2	0.602267
cluster 2	0.761681	cluster 2	0.586986
cluster 2	0.718587	cluster 2	0.647347
cluster 2	0.746706	cluster 2	0.55285
cluster 2	0.64709	cluster 2	0.740001
cluster 2	0.685587	cluster 2	0.610487
cluster 2	0.787447	cluster 2	0.68717
cluster 2	0.757666	cluster 2	0.618945
cluster 2	0.683748	cluster 2	0.622331
cluster 2	0.778252	cluster 2	0.605407
cluster 2	0.784169	cluster 2	0.615021
cluster 2	0.735815	cluster 2	0.613595
cluster 2	0.681571	cluster 2	0.648223
cluster 2	0.750956	cluster 2	0.630458
cluster 2	0.755653	cluster 2	0.652004
cluster 2	0.687886	cluster 2	0.640026
cluster 2	0.69209	cluster 2	0.597425
cluster 2	0.613671	cluster 2	0.608615
cluster 2	0.69101	cluster 2	0.577719
cluster 2	0.689413	cluster 2	0.616011
cluster 2	0.733021	cluster 2	0.550285
cluster 2	0.726633	cluster 2	0.660451
cluster 2	0.714663	cluster 2	0.617732
cluster 2	0.72053	cluster 2	0.582283
cluster 2	0.671466	cluster 2	0.664553
cluster 2	0.767245	cluster 2	0.608691
cluster 2	0.698231	cluster 2	0.531317
cluster 2	0.679523	cluster 2	0.55772
cluster 2	0.680272	cluster 2	0.663465
cluster 2	0.724016	cluster 2	0.645022
cluster 2	0.715861	cluster 2	0.593209
cluster 2	0.768569	cluster 2	0.547677
cluster 2	0.69157	cluster 2	0.596879
cluster 2	0.794445	cluster 2	0.589141
cluster 2	0.776612	cluster 2	0.705358
cluster 2	0.660303	cluster 2	0.598172
cluster 2	0.757813	cluster 2	0.635346
cluster 2	0.774058	cluster 2	0.680276
cluster 2	0.810917	cluster 2	0.621493
cluster 2	0.760058	cluster 2	0.647692
cluster 2	0.793275	cluster 2	0.678271
cluster 2	0.663506	cluster 2	0.644478
cluster 2	0.666122	cluster 2	0.628014
cluster 2	0.777802	cluster 2	0.587827
cluster 2	0.690729	cluster 2	0.669866
cluster 2	0.674377	cluster 2	0.665152
cluster 2	0.656484	cluster 2	0.670326
cluster 2	0.751094	cluster 2	0.650386
cluster 2	0.727079	cluster 2	0.604482
cluster 2	0.681653	cluster 2	0.604553
cluster 2	0.696164	cluster 2	0.57708
cluster 2	0.675296	cluster 2	0.599679
cluster 2	0.775619	cluster 2	0.617815
cluster 2	0.66773	cluster 2	0.575805
cluster 2	0.784032	cluster 2	0.673395
cluster 2	0.762588	cluster 2	0.717157
cluster 2	0.769464	cluster 2	0.619806
cluster 2	0.75863	cluster 2	0.619652
cluster 2	0.748365	cluster 2	0.611847
cluster 2	0.85505	cluster 2	0.621185
cluster 2	0.703956	cluster 2	0.596231
cluster 2	0.610247	cluster 2	0.580098
cluster 2	0.685655	cluster 2	0.714172
cluster 2	0.658534	cluster 2	0.645167
cluster 2	0.732356	cluster 2	0.542178
cluster 2	0.742121	cluster 2	0.581987
cluster 2	0.676474	cluster 2	0.633682
cluster 2	0.670616	cluster 2	0.605477
cluster 2	0.682125	cluster 2	0.626612
cluster 2	0.68734	cluster 2	0.64752
cluster 2	0.712039	cluster 2	0.604511
cluster 2	0.651404	cluster 2	0.614238
cluster 2	0.714423	cluster 2	0.661413
cluster 2	0.8719	cluster 2	0.670962
cluster 2	0.742042	cluster 2	0.566322
cluster 2	0.762945	cluster 2	0.58161
cluster 2	0.769735	cluster 2	0.618208
cluster 2	0.648447	cluster 2	0.643501
cluster 2	0.694641	cluster 2	0.663117
cluster 2	0.828006	cluster 2	0.630133
cluster 2	0.623673	cluster 2	0.684081
cluster 2	0.715204	cluster 2	0.608173
cluster 2	0.695287	cluster 2	0.572022
cluster 2	0.677797	cluster 2	0.603543
cluster 2	0.718785	cluster 2	0.703775
cluster 2	0.705286	cluster 2	0.675962
cluster 2	0.754718	cluster 2	0.738036
cluster 2	0.689244	cluster 2	0.700097
cluster 2	0.653057	cluster 2	0.588522
cluster 2	0.656545	cluster 2	0.625112
cluster 2	0.733142	cluster 2	0.512738
cluster 2	0.750912	cluster 2	0.627983
cluster 2	0.75333	cluster 2	0.598958
cluster 2	0.617867	cluster 2	0.56872
cluster 2	0.706339	cluster 2	0.661366
cluster 2	0.670213	cluster 2	0.611824
cluster 2	0.733697	cluster 2	0.682468
cluster 2	0.762697	cluster 2	0.652317
cluster 2	0.679929	cluster 2	0.567041
cluster 2	0.723199	cluster 2	0.56349
cluster 2	0.675458	cluster 2	0.679509
cluster 2	0.742053	cluster 2	0.607285
cluster 2	0.755131	cluster 2	0.659026
cluster 2	0.81522	cluster 2	0.711756
cluster 2	0.706362	cluster 2	0.610114
cluster 2	0.716999	cluster 2	0.678249
cluster 2	0.79541	cluster 2	0.636911
cluster 2	0.77042	cluster 2	0.611034
cluster 2	0.638076	cluster 2	0.629472
cluster 2	0.736449	cluster 2	0.630364
cluster 2	0.695179	cluster 2	0.54268
cluster 2	0.774616	cluster 2	0.638643
cluster 2	0.759841	cluster 2	0.632805
cluster 2	0.729428	cluster 2	0.531395
cluster 2	0.748237	cluster 2	0.669141
cluster 2	0.724079	cluster 2	0.552931
cluster 2	0.753842	cluster 2	0.647276
cluster 2	0.734634	cluster 2	0.672819
cluster 2	0.684394	cluster 2	0.648772
cluster 2	0.712207	cluster 2	0.613214
cluster 2	0.681932	cluster 2	0.670723
cluster 2	0.735567	cluster 2	0.616786
cluster 2	0.659023	cluster 2	0.65748
cluster 2	0.645718	cluster 2	0.609238
cluster 2	0.732476	cluster 2	0.67644
cluster 2	0.650056	cluster 2	0.549151
cluster 2	0.73872	cluster 2	0.567533
cluster 2	0.674529	cluster 2	0.616256
cluster 2	0.698211	cluster 2	0.679446
cluster 2	0.725997	cluster 2	0.571663
cluster 2	0.774268	cluster 2	0.60172
cluster 2	0.733346	cluster 2	0.613846
cluster 2	0.706142	cluster 2	0.631844
cluster 2	0.842045	cluster 2	0.663718
cluster 2	0.695663	cluster 2	0.640105
cluster 2	0.757658	cluster 2	0.626392
cluster 2	0.653363	cluster 2	0.636738
cluster 2	0.700863	cluster 2	0.668459
cluster 2	0.68998	cluster 2	0.559015
cluster 2	0.695423	cluster 2	0.579419
cluster 2	0.767945	cluster 2	0.661426
cluster 2	0.743195	cluster 2	0.674249
cluster 2	0.696483	cluster 2	0.557876
cluster 2	0.642525	cluster 2	0.679387
cluster 2	0.658284	cluster 2	0.554764
cluster 2	0.687015	cluster 2	0.621305
cluster 2	0.665331	cluster 2	0.546589
cluster 2	0.733696	cluster 2	0.610856
cluster 2	0.823617	cluster 2	0.665632
cluster 2	0.670328	cluster 2	0.529661
cluster 2	0.666244	cluster 2	0.571211
cluster 2	0.741244	cluster 2	0.591005
cluster 2	0.612404	cluster 2	0.670022
cluster 2	0.732284	cluster 2	0.639005
cluster 2	0.725499	cluster 2	0.636878
cluster 2	0.644304	cluster 2	0.554729
cluster 2	0.756708	cluster 2	0.553262
cluster 2	0.793141	cluster 2	0.61275
cluster 2	0.677807	cluster 2	0.586863
cluster 2	0.746454	cluster 2	0.613656
cluster 2	0.785458	cluster 2	0.564855
cluster 2	0.650136	cluster 2	0.658077
cluster 2	0.700768	cluster 2	0.676118
cluster 2	0.740154	cluster 2	0.690038
cluster 2	0.734238	cluster 2	0.773196
cluster 2	0.77789	cluster 2	0.594007
cluster 2	0.734662	cluster 2	0.630681
cluster 2	0.793426	cluster 2	0.668489
cluster 2	0.780198	cluster 2	0.632937
cluster 2	0.761878	cluster 2	0.643978
cluster 2	0.771971	cluster 2	0.691878
cluster 2	0.670807	cluster 2	0.65424
cluster 2	0.653845	cluster 2	0.65083
cluster 2	0.73217	cluster 2	0.667059
cluster 2	0.713585	cluster 2	0.615651
cluster 2	0.684761	cluster 2	0.627691
cluster 2	0.732549	cluster 2	0.662803
cluster 2	0.65854	cluster 2	0.605532
cluster 2	0.751528	cluster 2	0.685979
cluster 2	0.725754	cluster 2	0.598912
cluster 2	0.705203	cluster 2	0.636588
cluster 2	0.670936	cluster 2	0.568758
cluster 2	0.803751	cluster 2	0.596257
cluster 2	0.712474	cluster 2	0.540088
cluster 2	0.651699	cluster 2	0.650119
cluster 2	0.769613	cluster 2	0.643595
cluster 2	0.688982	cluster 2	0.701788
cluster 2	0.736058	cluster 2	0.587665
cluster 2	0.726759	cluster 2	0.628698
cluster 2	0.630215	cluster 2	0.676341
cluster 2	0.707561	cluster 2	0.731958
cluster 2	0.63634	cluster 2	0.632164
cluster 2	0.681694	cluster 2	0.66008
cluster 2	0.652851	cluster 2	0.554543
cluster 2	0.78965	cluster 2	0.602849
cluster 2	0.817253	cluster 2	0.621366
cluster 2	0.640797	cluster 2	0.609587
cluster 2	0.702203	cluster 2	0.571468
cluster 2	0.698013	cluster 2	0.634728
cluster 2	0.812121	cluster 2	0.627101
cluster 2	0.793714	cluster 2	0.604962
cluster 2	0.627881	cluster 2	0.638316
cluster 2	0.64064	cluster 2	0.675447
cluster 2	0.825339	cluster 2	0.654615
cluster 2	0.675728	cluster 2	0.569825
cluster 2	0.683394	cluster 2	0.658712
cluster 2	0.822415	cluster 2	0.713805
cluster 2	0.748463	cluster 2	0.666731
cluster 2	0.741795	cluster 2	0.6107
cluster 2	0.661632	cluster 2	0.68669
cluster 2	0.820064	cluster 2	0.611121
cluster 2	0.675314	cluster 2	0.607695
cluster 2	0.767481	cluster 2	0.681116
cluster 2	0.777033	cluster 2	0.613998
cluster 2	0.699345	cluster 2	0.608299
cluster 2	0.737659	cluster 2	0.66181
cluster 2	0.698645	cluster 2	0.611568
cluster 2	0.672746	cluster 2	0.582234
cluster 2	0.725755	cluster 2	0.567999
cluster 2	0.664634	cluster 2	0.614785
cluster 2	0.634089	cluster 2	0.62443
cluster 2	0.735997	cluster 2	0.650304
cluster 2	0.680553	cluster 2	0.616952
cluster 2	0.758475	cluster 2	0.627679
cluster 2	0.783462	cluster 2	0.660728
cluster 2	0.710162	cluster 2	0.56975
cluster 2	0.769016	cluster 2	0.583566
cluster 2	0.728982	cluster 2	0.61383
cluster 2	0.675947	cluster 2	0.662628
cluster 2	0.785236	cluster 2	0.623587
cluster 2	0.639132	cluster 2	0.57058
cluster 2	0.738671	cluster 2	0.599948
cluster 2	0.674757	cluster 2	0.65992
cluster 2	0.716073	cluster 2	0.592012
cluster 2	0.756006	cluster 2	0.712775
cluster 2	0.720894	cluster 2	0.594787
cluster 2	0.641365	cluster 2	0.596652
cluster 2	0.803569	cluster 2	0.663442
cluster 2	0.761558	cluster 2	0.584564
cluster 2	0.823447	cluster 2	0.623578
cluster 2	0.732893	cluster 2	0.629677
cluster 2	0.752729	cluster 2	0.573902
cluster 2	0.773071	cluster 2	0.527643
cluster 2	0.693624	cluster 2	0.678029
cluster 2	0.749673	cluster 2	0.589169
cluster 2	0.692641	cluster 2	0.660526
cluster 2	0.817437	cluster 2	0.608913
cluster 2	0.738104	cluster 2	0.544967
cluster 2	0.652665	cluster 2	0.557688
cluster 2	0.735236	cluster 2	0.576321
cluster 2	0.678585	cluster 2	0.622808
cluster 2	0.776425	cluster 2	0.590021
cluster 2	0.814682	cluster 2	0.605451
cluster 2	0.722413	cluster 2	0.689708
cluster 2	0.68494	cluster 2	0.648083
cluster 2	0.721502	cluster 2	0.526864
cluster 2	0.757256	cluster 2	0.633819
cluster 2	0.687436	cluster 2	0.606753
cluster 2	0.725567	cluster 2	0.567803
cluster 2	0.673562	cluster 2	0.565086
cluster 2	0.733073	cluster 2	0.571524
cluster 2	0.757351	cluster 2	0.609957
cluster 2	0.774266	cluster 2	0.707009
cluster 2	0.71217	cluster 2	0.58287
cluster 2	0.820845	cluster 2	0.58565
cluster 2	0.72394	cluster 2	0.622357
cluster 2	0.66648	cluster 2	0.636902
cluster 2	0.671556	cluster 2	0.598048
cluster 2	0.712038	cluster 2	0.597127
cluster 2	0.753263	cluster 2	0.687464
cluster 2	0.738923	cluster 2	0.735665
cluster 2	0.752501	cluster 2	0.627673
cluster 2	0.734355	cluster 2	0.603222
cluster 2	0.665546	cluster 2	0.546997
cluster 2	0.764467	cluster 2	0.593531
cluster 2	0.71273	cluster 2	0.605827
cluster 2	0.75917	cluster 2	0.602932
cluster 2	0.740035	cluster 2	0.713109
cluster 2	0.709233	cluster 2	0.646206
cluster 2	0.699163	cluster 2	0.538013
cluster 2	0.650219	cluster 2	0.578671
cluster 2	0.801352	cluster 2	0.550065
cluster 2	0.728884	cluster 2	0.569373
cluster 2	0.77223	cluster 2	0.649057
cluster 2	0.714941	cluster 2	0.636066
cluster 2	0.749138	cluster 2	0.670201
cluster 2	0.587004	cluster 2	0.608855
cluster 2	0.72271	cluster 2	0.621686
cluster 2	0.773075	cluster 2	0.623982
cluster 2	0.721269	cluster 2	0.583223
cluster 2	0.7534	cluster 2	0.628116
cluster 2	0.638341	cluster 2	0.593507
cluster 2	0.705244	cluster 2	0.710128
cluster 2	0.703208	cluster 2	0.546332
cluster 2	0.651903	cluster 2	0.723319
cluster 2	0.644102	cluster 2	0.636469
cluster 2	0.637733	cluster 2	0.532734
cluster 2	0.734607	cluster 2	0.618164
cluster 2	0.721817	cluster 2	0.598587
cluster 2	0.613737	cluster 2	0.607503
cluster 2	0.675575	cluster 2	0.690737
cluster 2	0.714273	cluster 2	0.626962
cluster 2	0.735981	cluster 2	0.619213
cluster 2	0.679629	cluster 2	0.660118
cluster 2	0.77046	cluster 2	0.670026
cluster 2	0.734644	cluster 2	0.588184
cluster 2	0.781457	cluster 2	0.633393
cluster 2	0.604242	cluster 2	0.642172
cluster 2	0.693584	cluster 2	0.674973
cluster 2	0.685619	cluster 2	0.59707
cluster 2	0.737133	cluster 2	0.713286
cluster 2	0.654364	cluster 2	0.625566
cluster 2	0.74344	cluster 2	0.652448
cluster 2	0.759603	cluster 2	0.606503
cluster 2	0.747334	cluster 2	0.595741
cluster 2	0.80803	cluster 2	0.628349
cluster 2	0.738817	cluster 2	0.709526
cluster 2	0.778623	cluster 2	0.658328
cluster 2	0.657918	cluster 2	0.5962
cluster 2	0.69338	cluster 2	0.615175
[truncated: 3,002 more rows]

## Sheet: Figure_2d
ISL1		NKX2-5
cluster	distance	cluster	distance
1	0.372031	1	0.426567
1	0.43701	1	0.413056
1	0.441727	1	0.450695
1	0.360893	1	0.453674
1	0.389992	1	0.482144
1	0.523101	1	0.38236
1	0.460108	1	0.421382
1	0.47685	1	0.514454
1	0.45202	1	0.51743
1	0.481186	1	0.481526
1	0.416991	1	0.494047
1	0.473314	1	0.513924
1	0.463005	1	0.518506
1	0.322972	1	0.528227
1	0.402691	1	0.521347
1	0.498744	1	0.508823
1	0.425681	1	0.498632
1	0.519285	1	0.503894
1	0.467413	1	0.493314
1	0.49104	1	0.506388
1	0.40898	1	0.497312
1	0.457344	1	0.511721
1	0.474599	1	0.498701
1	0.363716	1	0.450689
1	0.535499	1	0.492378
1	0.535065	1	0.479799
1	0.480716	1	0.519909
1	0.515094	1	0.569208
1	0.420888	1	0.52781
1	0.512733	1	0.546209
1	0.477354	1	0.506925
1	0.410722	1	0.426624
1	0.509331	1	0.484861
1	0.509274	1	0.425437
1	0.497831	1	0.436042
1	0.451118	1	0.413157
1	0.48928	1	0.508872
1	0.458738	1	0.524174
1	0.423833	1	0.473461
1	0.503786	1	0.480829
1	0.402559	1	0.519734
1	0.501094	1	0.54174
1	0.436595	1	0.433136
1	0.521158	1	0.510299
1	0.371846	1	0.475974
1	0.521375	1	0.45656
1	0.479055	1	0.43938
1	0.48188	1	0.457631
1	0.487605	1	0.47165
1	0.392123	1	0.454522
1	0.467669	1	0.552982
1	0.447159	1	0.537844
1	0.548847	1	0.491365
1	0.534649	1	0.482308
1	0.586408	1	0.548575
1	0.516589	1	0.518652
1	0.534551	1	0.526142
1	0.48709	1	0.524817
1	0.532798	1	0.516326
1	0.449156	1	0.510747
1	0.52664	1	0.506212
1	0.525534	1	0.498579
1	0.534217	1	0.487241
1	0.541771	1	0.491158
1	0.427578	1	0.525221
1	0.556995	1	0.502578
2	0.441929	1	0.448097
2	0.42462	1	0.491967
2	0.387236	1	0.471913
2	0.357253	1	0.489598
2	0.462034	1	0.56263
2	0.475516	1	0.516159
2	0.457232	1	0.521596
2	0.439054	1	0.546758
2	0.440703	1	0.451161
2	0.418712	1	0.48914
2	0.446812	1	0.474184
2	0.422383	1	0.490583
2	0.464433	1	0.447775
2	0.448159	1	0.505575
2	0.464048	1	0.525539
2	0.460246	1	0.484345
2	0.44599	1	0.506075
2	0.496136	1	0.539691
2	0.507827	1	0.513054
2	0.461967	1	0.483195
2	0.440544	1	0.502882
2	0.416027	1	0.476232
2	0.417563	1	0.460386
2	0.411614	1	0.521258
2	0.453288	1	0.420121
2	0.453063	1	0.489346
2	0.452924	1	0.562733
2	0.445707	1	0.53294
2	0.295447	1	0.529143
2	0.367121	1	0.547074
2	0.478431	1	0.568922
2	0.405636	1	0.54304
2	0.456578	1	0.550443
2	0.39014	1	0.558069
2	0.383299	1	0.532196
2	0.361824	1	0.543932
2	0.37528	1	0.535618
2	0.367903	1	0.525436
2	0.463494	1	0.527228
2	0.391889	1	0.553485
2	0.383459	1	0.546925
2	0.383596	1	0.523907
2	0.383774	1	0.485
2	0.432978	1	0.538778
2	0.470933	1	0.537125
2	0.511695	1	0.572505
2	0.462527	1	0.606467
2	0.335943	1	0.574521
2	0.505446	1	0.580955
2	0.41706	1	0.55672
2	0.421321	1	0.514165
2	0.341359	1	0.528739
2	0.332763	1	0.474534
2	0.477605	1	0.478312
2	0.378361	1	0.457088
2	0.342314	1	0.566511
2	0.4578	1	0.587269
2	0.359681	1	0.514069
2	0.431049	1	0.517784
2	0.383988	1	0.578317
2	0.342829	1	0.565689
2	0.342708	1	0.498461
2	0.365543	1	0.547416
2	0.358744	1	0.436785
2	0.427349	1	0.456899
2	0.346891	1	0.462117
2	0.378964	1	0.493699
2	0.344613	1	0.539825
2	0.3476	1	0.487087
2	0.406223	1	0.456857
2	0.494773	1	0.444569
2	0.516065	1	0.552963
2	0.449275	1	0.502842
2	0.306808	1	0.485296
2	0.461245	1	0.471267
2	0.421139	1	0.44595
2	0.37142	1	0.44538
2	0.314675	1	0.43143
2	0.324245	1	0.43488
2	0.473805	1	0.443318
2	0.332596	1	0.446256
2	0.432848	1	0.47036
2	0.38512	1	0.43851
2	0.406798	1	0.467666
2	0.364219	1	0.488215
2	0.350731	1	0.475328
2	0.369316	1	0.469729
2	0.362676	1	0.540267
2	0.341774	1	0.492381
2	0.405083	1	0.532432
2	0.386532	1	0.505244
2	0.35312	1	0.446787
2	0.358882	1	0.460507
2	0.361467	1	0.461001
2	0.422013	1	0.500619
2	0.490876	1	0.453119
2	0.542442	1	0.508219
2	0.456923	1	0.517972
2	0.335208	1	0.494546
2	0.462449	1	0.44097
2	0.40103	1	0.518429
2	0.365495	1	0.513503
2	0.34362	1	0.485117
2	0.347649	1	0.485615
2	0.471188	1	0.442988
2	0.372212	1	0.452537
2	0.463818	1	0.433404
2	0.46779	1	0.534946
2	0.489017	1	0.508498
2	0.446624	1	0.455841
2	0.466936	1	0.49621
2	0.472575	1	0.569702
2	0.455793	1	0.507201
2	0.42842	1	0.510715
2	0.506822	1	0.498309
2	0.449407	1	0.48509
2	0.471318	1	0.492224
2	0.489265	1	0.476797
2	0.479477	1	0.480792
2	0.510371	1	0.494071
2	0.513905	1	0.488774
2	0.469665	1	0.511146
2	0.471939	1	0.47462
2	0.421872	1	0.462629
2	0.411675	1	0.494827
2	0.388568	1	0.50446
2	0.493916	1	0.526638
2	0.475965	1	0.577368
2	0.483009	1	0.530692
2	0.478814	1	0.563923
2	0.44396	1	0.526747
2	0.405452	1	0.438287
2	0.387091	1	0.501749
2	0.372633	1	0.442577
2	0.411337	1	0.465927
2	0.372569	1	0.450555
2	0.460118	1	0.526583
2	0.381844	1	0.537672
2	0.37544	1	0.468118
2	0.385789	1	0.489812
2	0.394968	1	0.508687
2	0.441373	1	0.528879
2	0.484606	1	0.477679
2	0.533688	1	0.526897
2	0.447279	1	0.492057
2	0.340908	1	0.446807
2	0.487814	1	0.515571
2	0.411227	1	0.497391
2	0.411444	1	0.408101
2	0.366674	1	0.42957
2	0.341682	1	0.520002
2	0.471306	1	0.477332
2	0.37494	1	0.493211
2	0.400435	1	0.493396
2	0.356121	1	0.490116
2	0.382822	1	0.496596
2	0.417193	1	0.493529
2	0.357913	1	0.483501
2	0.383469	1	0.465374
2	0.411653	1	0.483572
2	0.355079	1	0.513608
2	0.36537	1	0.457539
2	0.397579	1	0.455818
2	0.464642	1	0.475664
2	0.509046	1	0.470495
2	0.525721	1	0.465433
2	0.463289	1	0.508243
2	0.426949	1	0.518309
2	0.472661	1	0.502344
2	0.426686	1	0.493213
2	0.429139	1	0.453399
2	0.430883	1	0.463589
2	0.391135	1	0.502211
2	0.526587	1	0.487234
2	0.417377	1	0.449603
2	0.291861	1	0.498992
2	0.343216	1	0.472734
2	0.396854	1	0.480678
2	0.312477	1	0.503604
2	0.422924	1	0.522242
2	0.370417	1	0.528592
2	0.305312	1	0.509047
2	0.32999	1	0.491969
2	0.348916	1	0.423987
2	0.425605	1	0.516846
2	0.505948	1	0.523523
2	0.555902	1	0.507885
2	0.447356	1	0.511397
2	0.35204	1	0.549876
2	0.517675	1	0.479418
2	0.426472	1	0.500811
2	0.416724	1	0.502097
2	0.371328	1	0.489049
2	0.2997	1	0.484728
2	0.50548	1	0.493077
2	0.371892	1	0.481381
2	0.328691	1	0.494836
2	0.368479	1	0.478644
2	0.281102	1	0.492027
2	0.36672	1	0.473137
2	0.34516	1	0.431125
2	0.283943	1	0.478237
2	0.302045	1	0.468024
2	0.329155	1	0.508345
2	0.394846	1	0.516612
2	0.462576	1	0.506564
2	0.542786	1	0.525287
2	0.403252	1	0.484102
2	0.360125	1	0.409498
2	0.478371	1	0.505112
2	0.39894	1	0.424504
2	0.371604	1	0.425935
2	0.354802	1	0.409313
2	0.284031	1	0.483316
2	0.497236	1	0.491459
2	0.349308	1	0.460106
2	0.335759	1	0.496489
2	0.294981	1	0.52051
2	0.387651	1	0.523125
2	0.313607	1	0.435173
2	0.325481	1	0.521044
2	0.279058	1	0.534717
2	0.286462	1	0.529237
2	0.410927	1	0.449077
2	0.455026	1	0.481296
2	0.495555	1	0.548676
2	0.400578	1	0.51241
2	0.30207	1	0.509972
2	0.489356	1	0.509312
2	0.391123	1	0.506939
2	0.39209	1	0.500508
2	0.286847	1	0.486173
2	0.282219	1	0.495519
2	0.452804	1	0.48575
2	0.251845	1	0.498573
2	0.359454	1	0.513057
2	0.398104	1	0.485194
2	0.321547	1	0.452341
2	0.379943	1	0.506244
2	0.383756	1	0.481857
2	0.325923	1	0.532043
2	0.411604	1	0.543012
2	0.435021	1	0.529084
2	0.504233	1	0.539528
2	0.395228	1	0.497425
2	0.361189	1	0.441824
2	0.50768	1	0.509698
2	0.411641	1	0.445271
2	0.418436	1	0.479683
2	0.363092	1	0.419866
2	0.352449	1	0.526444
2	0.450992	1	0.502313
2	0.311665	1	0.455509
2	0.361713	1	0.502926
2	0.34796	1	0.522885
2	0.273017	1	0.536766
2	0.261304	1	0.469394
2	0.320802	1	0.497583
2	0.421516	1	0.497659
2	0.483548	1	0.535486
2	0.53858	1	0.503412
2	0.426299	1	0.458469
2	0.32211	1	0.558468
2	0.480403	1	0.564759
2	0.393403	1	0.556378
2	0.375256	1	0.546041
2	0.322308	1	0.548298
2	0.254837	1	0.537379
2	0.50441	1	0.555953
2	0.321002	1	0.573951
2	0.423558	1	0.549334
2	0.362297	1	0.57174
2	0.379095	1	0.549066
2	0.4072	1	0.552262
2	0.442957	1	0.555795
2	0.47611	1	0.551697
2	0.510519	1	0.552791
2	0.425911	1	0.576179
2	0.427909	1	0.593436
2	0.470111	1	0.587407
2	0.427201	1	0.595787
2	0.409936	1	0.526802
2	0.44358	1	0.557859
2	0.397614	1	0.55568
2	0.496053	1	0.558228
2	0.411712	1	0.544637
2	0.351124	1	0.585912
2	0.321413	1	0.55832
2	0.299477	1	0.54955
2	0.388547	1	0.583516
2	0.455552	1	0.599209
2	0.538066	1	0.602058
2	0.390546	1	0.556242
2	0.329164	1	0.573254
2	0.513512	1	0.494106
2	0.413682	1	0.506158
2	0.420729	1	0.52847
2	0.328925	1	0.531486
2	0.327753	1	0.543194
2	0.482717	1	0.540908
2	0.293295	1	0.53748
2	0.281936	1	0.536761
2	0.31751	1	0.523014
2	0.425362	1	0.544756
2	0.48374	1	0.54714
2	0.555406	1	0.55854
2	0.450235	1	0.571226
2	0.344517	1	0.545042
2	0.479398	1	0.530576
2	0.384205	1	0.567738
2	0.380849	1	0.541101
2	0.358781	1	0.559736
2	0.295687	1	0.552945
2	0.514009	1	0.57732
2	0.354929	1	0.563437
2	0.314338	1	0.577193
2	0.421769	1	0.521047
2	0.483814	1	0.555833
2	0.541014	1	0.520426
2	0.421804	1	0.538796
2	0.310451	1	0.51463
2	0.475015	1	0.602717
2	0.385307	1	0.546074
2	0.371562	1	0.535372
2	0.320621	1	0.555108
2	0.262573	1	0.59568
2	0.507841	1	0.593468
2	0.328975	1	0.571619
2	0.433899	1	0.593954
2	0.45665	1	0.442943
2	0.539442	1	0.536167
2	0.414351	1	0.500915
2	0.294264	1	0.514488
2	0.504494	1	0.497618
2	0.420215	1	0.48357
2	0.403377	1	0.485085
2	0.309806	1	0.476289
2	0.281946	1	0.485635
2	0.49283	1	0.499548
2	0.272866	1	0.479861
2	0.408564	1	0.513663
2	0.499948	1	0.497953
2	0.380477	1	0.502969
2	0.40444	1	0.510271
2	0.479907	1	0.48252
2	0.442853	1	0.501232
2	0.45544	1	0.5569
2	0.407169	1	0.520245
2	0.399671	1	0.545317
2	0.454699	1	0.508188
2	0.420325	1	0.450315
2	0.485044	1	0.510607
2	0.347378	1	0.488262
2	0.454028	1	0.506816
2	0.512878	1	0.468304
2	0.468716	1	0.524285
2	0.527906	1	0.486382
2	0.469736	1	0.471661
2	0.450518	1	0.511957
2	0.392008	1	0.506833
2	0.472666	1	0.544999
2	0.491316	1	0.507557
2	0.501111	1	0.503766
2	0.532038	1	0.525315
2	0.524173	1	0.491478
2	0.535178	1	0.499764
2	0.522053	1	0.483988
2	0.520987	1	0.475489
2	0.492002	1	0.479182
2	0.527992	1	0.494557
2	0.417444	1	0.469556
2	0.488416	1	0.50786
2	0.448489	1	0.458147
2	0.488222	1	0.50622
2	0.446193	1	0.469721
2	0.412514	1	0.492601
2	0.399227	1	0.484903
2	0.42232	1	0.474618
2	0.483549	1	0.491255
2	0.434797	1	0.520192
2	0.399915	1	0.517159
2	0.283584	1	0.509964
2	0.263034	1	0.505983
2	0.445617	1	0.442852
2	0.291717	1	0.492112
2	0.421555	1	0.501873
2	0.430743	1	0.535821
2	0.503947	1	0.477449
2	0.484777	1	0.521914
2	0.518583	1	0.482616
2	0.498724	1	0.507157
2	0.379962	1	0.496145
2	0.392897	1	0.533837
2	0.390896	1	0.526389
2	0.490987	1	0.498834
2	0.413834	1	0.498383
2	0.405594	1	0.565063
2	0.389523	1	0.600384
2	0.513691	1	0.603502
2	0.412683	1	0.591125
2	0.29063	1	0.594812
2	0.474104	1	0.601682
2	0.305315	1	0.593447
2	0.489568	1	0.573916
2	0.2967	1	0.60183
2	0.449208	1	0.625859
3	0.576391	1	0.605375
3	0.544949	1	0.573437
3	0.537794	1	0.596401
3	0.584658	1	0.573813
3	0.549865	1	0.580167
3	0.566918	1	0.568534
3	0.543414	1	0.605927
3	0.577868	1	0.593437
3	0.601693	1	0.577521
3	0.599179	1	0.545129
3	0.57909	1	0.583933
3	0.581982	1	0.586219
3	0.560647	1	0.607693
3	0.558974	1	0.5659
3	0.579804	1	0.593182
3	0.535966	1	0.579877
3	0.537469	1	0.611072
3	0.599841	1	0.582073
3	0.573324	1	0.629938
3	0.610995	1	0.613981
3	0.629482	1	0.603369
3	0.556597	1	0.602474
3	0.552807	1	0.279868
3	0.552251	1	0.319139
3	0.569277	1	0.350551
3	0.615524	1	0.331047
3	0.5781	1	0.361533
3	0.568727	1	0.348693
3	0.577401	1	0.422069
3	0.566173	1	0.340308
3	0.550266	1	0.341382
3	0.56655	1	0.353289
3	0.571947	1	0.417257
3	0.578573	1	0.408062
3	0.562936	1	0.375819
3	0.567735	1	0.43387
3	0.56288	1	0.45374
3	0.59086	1	0.437467
3	0.55918	1	0.428015
3	0.59868	1	0.439404
3	0.554246	1	0.408567
3	0.542423	1	0.446668
3	0.544193	1	0.430061
3	0.575843	1	0.434613
3	0.548974	1	0.417695
3	0.551604	1	0.433735
3	0.544729	1	0.476292
3	0.565289	1	0.408696
3	0.593368	1	0.438467
3	0.567229	1	0.448914
3	0.556252	1	0.44885
3	0.532966	1	0.424212
3	0.59721	1	0.445804
3	0.514703	1	0.22445
3	0.566856	1	0.27074
3	0.593467	1	0.249096
3	0.504802	1	0.291076
3	0.578212	1	0.299036
3	0.561839	1	0.443481
3	0.535476	1	0.290445
3	0.534944	1	0.269813
3	0.545552	1	0.297722
3	0.531547	1	0.423419
3	0.569816	1	0.388817
3	0.518202	1	0.37449
3	0.512266	1	0.411752
3	0.537778	1	0.466445
3	0.505307	1	0.417774
3	0.513841	1	0.465676
3	0.488804	1	0.414116
3	0.512652	1	0.407529
3	0.545636	1	0.453714
3	0.568715	1	0.42244
3	0.502403	1	0.423517
3	0.55951	1	0.413458
3	0.51543	1	0.43266
3	0.484881	1	0.495424
3	0.504103	1	0.436272
3	0.476881	1	0.438397
3	0.522276	1	0.401746
3	0.510009	1	0.425701
3	0.521438	1	0.42706
3	0.487546	1	0.4278
3	0.579908	1	0.234796
3	0.526511	1	0.213443
3	0.54727	1	0.258636
3	0.493877	1	0.250349
3	0.488375	1	0.43224
3	0.524612	1	0.240855
3	0.503551	1	0.249386
3	0.52683	1	0.266292
3	0.559278	1	0.415073
3	0.548436	1	0.388752
3	0.510788	1	0.373841
3	0.530621	1	0.399467
3	0.561426	1	0.457663
3	0.549563	1	0.413353
3	0.536882	1	0.470981
3	0.477886	1	0.426547
3	0.522455	1	0.384452
3	0.549004	1	0.457011
3	0.550083	1	0.405805
3	0.587349	1	0.415448
3	0.508907	1	0.41097
3	0.515232	1	0.428012
3	0.597292	1	0.484394
3	0.539121	1	0.41055
3	0.551268	1	0.428149
3	0.547654	1	0.408945
3	0.560401	1	0.420064
3	0.555765	1	0.406879
3	0.575796	1	0.432957
3	0.538861	1	0.230172
3	0.585787	1	0.236344
3	0.499125	1	0.250216
3	0.535464	1	0.430654
3	0.563546	1	0.247461
3	0.53233	1	0.25101
3	0.536713	1	0.260678
3	0.483977	1	0.430182
3	0.605736	1	0.376461
3	0.545035	1	0.383611
3	0.535434	1	0.401577
3	0.582487	1	0.459765
3	0.511933	1	0.425125
3	0.532919	1	0.480567
3	0.539979	1	0.429399
3	0.531087	1	0.373749
3	0.581292	1	0.446433
3	0.53676	1	0.40729
3	0.468668	1	0.417303
3	0.528898	1	0.411538
3	0.579407	1	0.416614
3	0.512658	1	0.471488
3	0.531149	1	0.414334
3	0.584183	1	0.399555
3	0.538797	1	0.404938
3	0.583872	1	0.417446
3	0.54097	1	0.394903
3	0.492206	1	0.419642
3	0.55273	1	0.218787
3	0.526875	1	0.237622
3	0.542069	1	0.421022
3	0.575627	1	0.238708
3	0.54288	1	0.249376
3	0.518075	1	0.272993
3	0.58014	1	0.406362
3	0.55234	1	0.388664
3	0.552231	1	0.370508
3	0.484258	1	0.416543
3	0.541853	1	0.480671
3	0.613878	1	0.417659
3	0.543952	1	0.481241
3	0.579313	1	0.426874
3	0.49367	1	0.385156
3	0.602991	1	0.450358
3	0.598809	1	0.422968
3	0.597558	1	0.422096
3	0.589959	1	0.403964
3	0.590936	1	0.41712
3	0.61247	1	0.477097
3	0.629759	1	0.422919
3	0.605159	1	0.408702
3	0.59195	1	0.408887
3	0.592787	1	0.419094
3	0.550764	1	0.405997
3	0.589082	1	0.430928
3	0.55864	1	0.248921
3	0.514773	1	0.430237
3	0.567486	1	0.248851
3	0.590115	1	0.27197
3	0.60234	1	0.265067
3	0.59572	1	0.406565
3	0.615515	1	0.404769
3	0.559534	1	0.391052
3	0.608513	1	0.420755
3	0.582307	1	0.480898
3	0.59634	1	0.435857
3	0.621818	1	0.47785
3	0.604386	1	0.425602
3	0.561815	1	0.393871
3	0.568394	1	0.433903
3	0.546354	1	0.416076
3	0.590461	1	0.430542
3	0.583355	1	0.400059
3	0.582884	1	0.432635
3	0.557084	1	0.485793
3	0.57384	1	0.421605
3	0.576522	1	0.405973
3	0.591559	1	0.411895
3	0.583228	1	0.419761
3	0.605398	1	0.415027
3	0.59329	1	0.446694
3	0.579241	1	0.411742
3	0.547628	1	0.249449
3	0.62615	1	0.219494
3	0.57921	1	0.216812
3	0.588336	1	0.385066
3	0.565701	1	0.3598
3	0.594994	1	0.340821
3	0.609135	1	0.378791
3	0.624841	1	0.455257
3	0.595444	1	0.403245
3	0.601647	1	0.433893
3	0.545805	1	0.412497
3	0.565068	1	0.355116
3	0.549526	1	0.403529
3	0.560812	1	0.394541
3	0.564554	1	0.393035
3	0.555572	1	0.380916
3	0.547805	1	0.411775
3	0.574113	1	0.460282
3	0.602109	1	0.407809
3	0.511145	1	0.363106
3	0.587365	1	0.385349
3	0.566432	1	0.37537
3	0.544783	1	0.358533
3	0.526465	1	0.409312
3	0.544833	1	0.419985
3	0.574332	1	0.435459
3	0.533667	1	0.412457
3	0.545276	1	0.408159
3	0.564614	1	0.418938
3	0.556637	1	0.401843
3	0.575523	1	0.42623
3	0.572808	1	0.490302
3	0.571193	1	0.475735
3	0.584378	1	0.43601
3	0.55946	1	0.473719
3	0.533671	1	0.43154
3	0.511308	1	0.431936
3	0.569755	1	0.464333
3	0.549265	1	0.484357
3	0.528161	1	0.427722
3	0.530308	1	0.44853
3	0.524677	1	0.457843
3	0.605241	1	0.431662
3	0.587585	1	0.44808
3	0.540679	1	0.471564
3	0.511254	1	0.480439
3	0.538105	1	0.455582
3	0.594752	1	0.447005
3	0.569623	1	0.228434
3	0.573769	1	0.233616
3	0.568058	1	0.393808
3	0.547643	1	0.368445
3	0.57655	1	0.371917
3	0.598424	1	0.383156
3	0.551793	1	0.466211
3	0.534721	1	0.413962
3	0.604729	1	0.462189
3	0.549912	1	0.428333
3	0.600106	1	0.350318
3	0.56336	1	0.438767
3	0.606757	1	0.411655
3	0.568956	1	0.421794
3	0.501303	1	0.40373
3	0.48821	1	0.418718
3	0.586856	1	0.474429
3	0.557185	1	0.404396
3	0.532632	1	0.404777
3	0.543033	1	0.41331
3	0.548098	1	0.392228
3	0.523143	1	0.388103
3	0.542932	1	0.427362
3	0.532263	1	0.225409
3	0.536237	1	0.422129
3	0.547913	1	0.369006
3	0.512131	1	0.386518
3	0.558086	1	0.394695
3	0.586937	1	0.476141
3	0.564307	1	0.398026
3	0.551601	1	0.464642
3	0.52732	1	0.434067
3	0.55234	1	0.392048
3	0.539118	1	0.455949
3	0.461314	1	0.428856
3	0.538402	1	0.403443
3	0.573919	1	0.412751
3	0.534485	1	0.421619
3	0.548993	1	0.484239
3	0.573292	1	0.412205
3	0.518823	1	0.399133
3	0.582814	1	0.403843
3	0.521068	1	0.384075
3	0.535156	1	0.376143
3	0.575475	1	0.41708
3	0.537586	1	0.399067
3	0.576052	1	0.367421
3	0.548137	1	0.365092
3	0.543782	1	0.379291
3	0.547016	1	0.466114
3	0.528049	1	0.418097
3	0.567468	1	0.458955
3	0.564135	1	0.417434
3	0.519272	1	0.372962
3	0.514049	1	0.422303
3	0.519985	1	0.404276
3	0.540186	1	0.397701
3	0.539567	1	0.390276
3	0.548323	1	0.423623
3	0.547734	1	0.467768
3	0.552085	1	0.39834
3	0.550319	1	0.378325
3	0.581605	1	0.426153
3	0.590655	1	0.393239
3	0.617476	1	0.374661
3	0.605813	1	0.405048
3	0.520425	1	0.411334
3	0.558235	1	0.373352
3	0.570503	1	0.433968
3	0.530788	1	0.499677
3	0.592911	1	0.470256
3	0.532769	1	0.452269
3	0.593533	1	0.435184
3	0.561501	1	0.358229
3	0.604401	1	0.408403
3	0.584399	1	0.40026
3	0.561856	1	0.37802
3	0.607668	1	0.324934
3	0.566212	1	0.443133
3	0.602069	1	0.437865
3	0.601765	1	0.400052
3	0.564862	1	0.415493
3	0.532138	1	0.475674
3	0.571406	1	0.441416
3	0.570111	1	0.377142
3	0.559991	1	0.442121
3	0.521986	1	0.386276
3	0.576713	1	0.401089
3	0.587602	1	0.47393
3	0.60709	1	0.447459
3	0.581057	1	0.454828
3	0.582545	1	0.46704
3	0.594823	1	0.401001
3	0.592647	1	0.407717
3	0.594525	1	0.454871
3	0.609521	1	0.418886
3	0.559068	1	0.416065
3	0.565212	1	0.397729
3	0.567678	1	0.448772
3	0.578963	1	0.39895
3	0.565566	1	0.414061
3	0.533114	1	0.451836
3	0.53562	1	0.424714
3	0.62017	1	0.425376
3	0.572478	1	0.403338
3	0.605693	1	0.388635
3	0.556805	1	0.429698
3	0.582095	1	0.427064
3	0.535375	1	0.39874
3	0.575037	1	0.425126
3	0.507586	1	0.359452
3	0.535153	1	0.398066
3	0.541248	1	0.416427
3	0.575473	1	0.394125
3	0.550714	1	0.364742
3	0.54899	1	0.402887
3	0.587052	1	0.413662
3	0.523616	1	0.375044
3	0.578587	1	0.395058
3	0.572328	1	0.427164
3	0.532331	1	0.41743
3	0.581462	1	0.396399
3	0.545838	1	0.40138
3	0.53018	1	0.442178
3	0.487709	1	0.443294
3	0.58152	1	0.443329
3	0.546868	1	0.45521
3	0.49688	1	0.404345
3	0.531408	1	0.444046
3	0.589378	1	0.459626
3	0.547573	1	0.45646
3	0.531578	1	0.452063
3	0.521075	1	0.437325
3	0.548586	1	0.429396
3	0.549524	1	0.426392
3	0.547249	1	0.445082
3	0.528449	1	0.461095
3	0.527824	1	0.459552
3	0.576823	1	0.446553
3	0.549278	1	0.430515
3	0.522429	1	0.470284
3	0.52962	1	0.446434
3	0.534662	1	0.463043
3	0.467743	1	0.467171
3	0.588341	1	0.529212
3	0.538105	1	0.50261
3	0.499838	1	0.515494
3	0.513814	1	0.495848
3	0.55061	1	0.489226
3	0.549755	1	0.472879
3	0.535368	1	0.498746
3	0.591294	1	0.50383
3	0.507476	1	0.499551
3	0.590874	1	0.48929
3	0.555347	1	0.510484
3	0.532273	1	0.491973
3	0.58453	1	0.474316
3	0.544613	1	0.448877
3	0.548435	1	0.453188
3	0.542164	1	0.469779
3	0.582816	1	0.49284
3	0.532612	1	0.483074
3	0.504779	1	0.470443
3	0.563914	1	0.432673
3	0.531875	1	0.491964
3	0.563555	1	0.47749
3	0.564444	1	0.487938
3	0.586037	1	0.404745
3	0.511242	1	0.457471
3	0.549179	1	0.435268
3	0.540048	1	0.439904
3	0.52939	1	0.473432
3	0.552884	1	0.471283
3	0.586958	1	0.421876
3	0.561783	1	0.487687
3	0.544907	1	0.490897
3	0.50486	1	0.444501
3	0.531296	1	0.468128
3	0.552935	1	0.4167
3	0.583961	1	0.447992
3	0.514749	1	0.477707
3	0.521599	1	0.472548
3	0.545974	1	0.419547
3	0.530248	1	0.450311
3	0.563752	1	0.47645
3	0.569236	1	0.425815
3	0.524436	1	0.457672
3	0.556345	1	0.462063
3	0.533508	1	0.44283
3	0.56091	1	0.429417
3	0.519638	1	0.430645
3	0.533874	1	0.462971
3	0.517592	1	0.458398
3	0.546882	1	0.466734
3	0.56719	1	0.406785
3	0.530645	1	0.415389
3	0.622096	1	0.460162
3	0.543123	1	0.45766
3	0.586649	1	0.433316
3	0.564112	1	0.388378
3	0.583151	1	0.371785
3	0.531305	1	0.351125
3	0.575793	1	0.420001
3	0.552916	1	0.416246
3	0.611359	1	0.385661
3	0.560768	1	0.409426
3	0.558948	1	0.454487
3	0.565255	1	0.447259
3	0.532561	1	0.347926
3	0.547784	1	0.422103
3	0.54052	1	0.455521
3	0.564889	1	0.438335
3	0.571696	1	0.370172
3	0.584521	1	0.433033
3	0.523632	1	0.435465
3	0.534417	1	0.418604
3	0.584869	1	0.412343
3	0.544033	1	0.474527
3	0.527157	1	0.436912
3	0.497964	1	0.40072
3	0.57208	1	0.44056
3	0.488011	1	0.375754
3	0.594537	1	0.37659
3	0.57953	1	0.481862
3	0.579287	1	0.490098
3	0.53243	1	0.408715
3	0.589082	1	0.412715
3	0.523117	1	0.476994
3	0.496725	1	0.469412
3	0.589601	1	0.403116
3	0.576402	1	0.465569
3	0.577873	1	0.341694
3	0.598115	1	0.439894
3	0.63879	1	0.467784
3	0.587728	1	0.402152
3	0.583125	1	0.423822
3	0.548083	1	0.459724
3	0.587078	1	0.435125
3	0.591745	1	0.334155
3	0.555552	1	0.447638
3	0.633848	1	0.433901
3	0.544955	1	0.456206
3	0.614281	1	0.367668
3	0.526323	1	0.391815
3	0.577156	1	0.456802
3	0.56576	1	0.422561
3	0.525286	1	0.357275
3	0.569002	1	0.418494
3	0.539776	1	0.442099
3	0.531048	1	0.458713
3	0.571114	1	0.444543
3	0.565508	1	0.425921
3	0.533438	1	0.434566
3	0.567231	1	0.439059
3	0.564266	1	0.399303
3	0.520525	1	0.446336
3	0.579421	1	0.462289
3	0.536675	1	0.473627
3	0.566425	1	0.457187
3	0.524581	1	0.463478
3	0.541427	1	0.459561
3	0.541124	1	0.412086
3	0.544261	1	0.476538
3	0.564107	1	0.441905
3	0.554393	1	0.367454
3	0.569925	1	0.448698
3	0.534076	1	0.492012
3	0.58074	1	0.445776
3	0.528221	1	0.398772
3	0.567251	1	0.431717
3	0.581265	1	0.428994
3	0.568302	1	0.460739
3	0.547509	1	0.458016
3	0.555356	1	0.429569
3	0.57305	1	0.456522
3	0.551313	1	0.448579
3	0.566467	2	0.373712
3	0.55948	2	0.418872
3	0.574336	2	0.363493
3	0.524394	2	0.458084
3	0.599611	2	0.35034
3	0.543369	2	0.353812
3	0.545625	2	0.368634
3	0.582337	2	0.367635
3	0.552589	2	0.424225
3	0.582512	2	0.396468
3	0.579849	2	0.398379
3	0.55258	2	0.515634
3	0.509533	2	0.381349
3	0.549466	2	0.421167
3	0.547608	2	0.362409
3	0.570689	2	0.398904
3	0.597807	2	0.453419
3	0.550864	2	0.513258
3	0.553109	2	0.394195
3	0.61137	2	0.413992
3	0.556082	2	0.335523
3	0.54054	2	0.342252
3	0.498676	2	0.569129
3	0.524603	2	0.468622
3	0.559921	2	0.383828
3	0.521853	2	0.379559
3	0.548166	2	0.436366
3	0.578656	2	0.397387
3	0.555125	2	0.396045
3	0.55971	2	0.397556
3	0.555431	2	0.458106
3	0.540004	2	0.401767
3	0.58088	2	0.414707
3	0.580756	2	0.353776
3	0.56666	2	0.374106
3	0.558465	2	0.458099
3	0.590291	2	0.505824
3	0.57689	2	0.448721
3	0.554946	2	0.512701
3	0.543794	2	0.450068
3	0.538819	2	0.425472
3	0.501363	2	0.467632
3	0.565302	2	0.445199
3	0.554442	2	0.594148
3	0.467853	2	0.432625
3	0.552172	2	0.519747
3	0.533896	2	0.459208
3	0.583462	2	0.435982
3	0.531859	2	0.504483
3	0.600706	2	0.441078
3	0.531501	2	0.494666
3	0.565219	2	0.428113
3	0.52998	2	0.342272
3	0.53085	2	0.432458
3	0.556685	2	0.319009
3	0.533334	2	0.344341
3	0.508598	2	0.355997
3	0.553729	2	0.382064
3	0.474193	2	0.392766
3	0.563551	2	0.319123
3	0.563915	2	0.40226
3	0.534724	2	0.527411
3	0.545244	2	0.342952
3	0.570055	2	0.364287
3	0.527422	2	0.373303
3	0.589719	2	0.362656
3	0.560688	2	0.400685
3	0.477652	2	0.515
3	0.497636	2	0.385114
3	0.556556	2	0.362714
3	0.546293	2	0.343829
3	0.550922	2	0.369291
3	0.562231	2	0.556026
3	0.523556	2	0.477901
3	0.562903	2	0.354322
3	0.492033	2	0.340064
3	0.50327	2	0.414048
3	0.500151	2	0.326816
3	0.540954	2	0.358716
3	0.574731	2	0.347095
3	0.565741	2	0.435602
3	0.553356	2	0.329852
3	0.537647	2	0.347847
3	0.582071	2	0.336451
3	0.569318	2	0.36579
3	0.562107	2	0.489741
3	0.511235	2	0.503625
3	0.538019	2	0.43847
3	0.604652	2	0.522499
3	0.563308	2	0.427197
3	0.599941	2	0.409047
3	0.544874	2	0.481166
3	0.575447	2	0.367043
3	0.502927	2	0.599766
3	0.524429	2	0.393074
3	0.515308	2	0.480063
3	0.497087	2	0.422484
3	0.507714	2	0.465516
3	0.533525	2	0.487363
3	0.527478	2	0.37636
3	0.597009	2	0.555855
3	0.544072	2	0.428453
3	0.582335	2	0.413441
3	0.528508	2	0.395529
3	0.50812	2	0.425444
3	0.565568	2	0.414401
3	0.531205	2	0.409786
3	0.501075	2	0.432131
3	0.542214	2	0.444733
3	0.544379	2	0.402945
3	0.478615	2	0.475898
3	0.501118	2	0.446532
3	0.582741	2	0.441225
3	0.568331	2	0.398356
3	0.559612	2	0.338769
3	0.523419	2	0.398195
3	0.559675	2	0.408455
3	0.502506	2	0.441767
3	0.572923	2	0.442102
3	0.625009	2	0.411464
3	0.547841	2	0.420278
3	0.532557	2	0.529473
3	0.556525	2	0.424602
3	0.572452	2	0.460103
3	0.517293	2	0.414443
3	0.563488	2	0.406875
3	0.533224	2	0.454707
3	0.586356	2	0.465766
3	0.583612	2	0.398108
3	0.590455	2	0.420698
3	0.596249	2	0.444758
3	0.523863	2	0.442431
3	0.611793	2	0.41168
3	0.517463	2	0.450442
3	0.51223	2	0.372435
3	0.490519	2	0.467819
3	0.544133	2	0.440272
3	0.521012	2	0.491496
3	0.546039	2	0.445177
3	0.56479	2	0.44678
3	0.556044	2	0.430736
3	0.524735	2	0.493275
3	0.546189	2	0.572975
3	0.544452	2	0.429326
3	0.570038	2	0.421704
3	0.532033	2	0.450208
3	0.517082	2	0.45745
3	0.509747	2	0.476529
3	0.527037	2	0.463128
3	0.531548	2	0.510839
3	0.527251	2	0.441913
3	0.553465	2	0.310113
3	0.536469	2	0.311439
3	0.530219	2	0.325614
3	0.539441	2	0.350236
3	0.551336	2	0.359718
3	0.548835	2	0.303681
3	0.549712	2	0.331484
3	0.572833	2	0.500483
3	0.585741	2	0.353464
3	0.555968	2	0.371058
3	0.571094	2	0.378805
3	0.56114	2	0.37464
3	0.556594	2	0.417369
3	0.54944	2	0.507417
3	0.54005	2	0.393431
3	0.557821	2	0.365187
3	0.518216	2	0.329955
3	0.555143	2	0.350923
3	0.546186	2	0.560064
3	0.548251	2	0.469194
3	0.568782	2	0.322856
3	0.535332	2	0.284596
3	0.512303	2	0.416767
3	0.556016	2	0.314956
3	0.552576	2	0.368751
3	0.548113	2	0.329816
3	0.590718	2	0.446268
3	0.558271	2	0.315414
3	0.572502	2	0.318395
3	0.542044	2	0.334957
3	0.584472	2	0.357662
3	0.572666	2	0.469381
3	0.534537	2	0.462067
3	0.462164	2	0.410527
3	0.513249	2	0.481466
3	0.533349	2	0.418079
3	0.531171	2	0.364455
3	0.513913	2	0.445373
3	0.574803	2	0.368504
3	0.568153	2	0.562427
3	0.562355	2	0.411235
3	0.54643	2	0.493841
3	0.539024	2	0.385172
3	0.56223	2	0.431927
3	0.562789	2	0.521174
3	0.57188	2	0.374033
3	0.547325	2	0.50287
3	0.544084	2	0.390259
3	0.551193	2	0.390198
3	0.536678	2	0.436135
3	0.518016	2	0.40761
3	0.542003	2	0.451993
3	0.541532	2	0.430156
3	0.541088	2	0.440092
3	0.588839	2	0.508654
3	0.563003	2	0.437404
3	0.592072	2	0.406493
3	0.530664	2	0.425698
3	0.594086	2	0.371781
3	0.502898	2	0.350401
3	0.531992	2	0.444796
3	0.487888	2	0.415743
3	0.521164	2	0.443938
3	0.545265	2	0.435763
3	0.542769	2	0.438897
3	0.557598	2	0.505699
3	0.552553	2	0.418293
3	0.490652	2	0.455036
3	0.576137	2	0.414503
3	0.52601	2	0.392837
3	0.507649	2	0.432261
3	0.503623	2	0.4861
3	0.530608	2	0.413079
3	0.493338	2	0.416448
3	0.543654	2	0.424624
3	0.550264	2	0.438118
3	0.524443	2	0.430663
3	0.501587	2	0.478211
3	0.511972	2	0.432511
3	0.519117	2	0.468914
3	0.435635	2	0.427112
3	0.504108	2	0.509525
3	0.593291	2	0.457104
3	0.557436	2	0.461896
3	0.554606	2	0.445882
3	0.588589	2	0.494539
3	0.554275	2	0.533139
3	0.515237	2	0.425627
3	0.568827	2	0.44178
3	0.538486	2	0.466904
3	0.568802	2	0.471415
3	0.62519	2	0.490665
3	0.562123	2	0.478253
3	0.604092	2	0.523693
3	0.562066	2	0.302373
3	0.582217	2	0.317795
3	0.55062	2	0.349493
3	0.519907	2	0.363401
3	0.552624	2	0.307966
3	0.605883	2	0.333491
3	0.542383	2	0.507016
3	0.483813	2	0.331696
3	0.529784	2	0.362571
3	0.553383	2	0.335896
3	0.565002	2	0.347215
3	0.533417	2	0.388114
3	0.502615	2	0.492963
3	0.536303	2	0.372272
3	0.561815	2	0.353671
3	0.497903	2	0.3199
3	0.533797	2	0.32494
3	0.555979	2	0.542838
3	0.52969	2	0.442295
3	0.542427	2	0.337912
3	0.524962	2	0.30969
3	0.511131	2	0.400971
3	0.539504	2	0.318285
3	0.524403	2	0.365266
3	0.560225	2	0.314795
3	0.560095	2	0.41599
3	0.561955	2	0.318209
3	0.543079	2	0.334601
3	0.570733	2	0.294555
3	0.502646	2	0.353598
3	0.558992	2	0.45128
3	0.498137	2	0.47473
3	0.531776	2	0.419024
3	0.575095	2	0.490135
3	0.554062	2	0.39807
3	0.626944	2	0.391905
3	0.51466	2	0.471001
3	0.585395	2	0.389826
3	0.501534	2	0.578898
3	0.4881	2	0.394982
3	0.561616	2	0.475103
3	0.573635	2	0.40776
3	0.596621	2	0.429663
3	0.553601	2	0.490851
3	0.566205	2	0.373128
3	0.586993	2	0.506985
3	0.54247	2	0.345178
3	0.559812	2	0.334966
3	0.567939	2	0.384525
3	0.57684	2	0.31422
3	0.521228	2	0.351496
3	0.559661	2	0.502728
3	0.568949	2	0.326668
3	0.582414	2	0.39147
3	0.558259	2	0.373309
3	0.531026	2	0.360731
3	0.53977	2	0.413084
3	0.475317	2	0.506789
3	0.546817	2	0.383284
3	0.605199	2	0.365816
3	0.580244	2	0.330446
3	0.576759	2	0.336869
3	0.558103	2	0.535531
3	0.600328	2	0.452017
3	0.546445	2	0.336183
3	0.581912	2	0.309915
3	0.551359	2	0.38949
3	0.544437	2	0.324055
3	0.602241	2	0.371119
3	0.589553	2	0.332124
3	0.599366	2	0.422548
3	0.573367	2	0.30861
3	0.609715	2	0.361259
3	0.506294	2	0.305954
3	0.560209	2	0.365985
3	0.535383	2	0.464588
3	0.551333	2	0.492244
3	0.539661	2	0.403432
3	0.506625	2	0.488392
3	0.572094	2	0.408299
3	0.562733	2	0.398567
3	0.523192	2	0.448251
3	0.53624	2	0.393581
3	0.569719	2	0.56821
3	0.506859	2	0.380815
3	0.526767	2	0.47489
3	0.552406	2	0.411433
3	0.50737	2	0.436379
3	0.538758	2	0.495701
3	0.49429	2	0.387381
3	0.513173	2	0.505366
3	0.467837	2	0.363456
3	0.52744	2	0.349105
3	0.590891	2	0.343181
3	0.575306	2	0.34958
3	0.550647	2	0.493041
3	0.529584	2	0.378503
3	0.56723	2	0.383851
3	0.564689	2	0.346887
3	0.562511	2	0.398405
3	0.54025	2	0.407248
3	0.551257	2	0.487381
3	0.60403	2	0.385785
3	0.550565	2	0.364243
3	0.573962	2	0.351852
3	0.53668	2	0.341301
3	0.566056	2	0.56057
3	0.564139	2	0.480376
3	0.541265	2	0.335141
3	0.584224	2	0.336056
3	0.560707	2	0.436405
3	0.55346	2	0.360074
3	0.540551	2	0.389401
3	0.50068	2	0.363249
3	0.56036	2	0.436911
3	0.538003	2	0.357005
3	0.512298	2	0.349194
3	0.53979	2	0.341578
3	0.504138	2	0.379852
3	0.571561	2	0.443709
3	0.539256	2	0.489398
3	0.553204	2	0.444513
3	0.519041	2	0.478208
3	0.506413	2	0.439859
3	0.511052	2	0.404514
3	0.509574	2	0.45352
3	0.571818	2	0.408518
3	0.588601	2	0.578831
3	0.567386	2	0.412611
3	0.557059	2	0.467121
3	0.578306	2	0.405577
3	0.570683	2	0.444856
3	0.542997	2	0.507605
3	0.54474	2	0.402386
3	0.55362	2	0.499664
3	0.584891	2	0.392735
3	0.558539	2	0.362406
3	0.600259	2	0.40077
3	0.536565	2	0.506748
3	0.606265	2	0.400028
3	0.594609	2	0.402993
3	0.614262	2	0.339542
3	0.607593	2	0.393335
3	0.586718	2	0.391122
3	0.586484	2	0.44966
3	0.588285	2	0.388263
3	0.514748	2	0.380279
3	0.529063	2	0.334349
3	0.519027	2	0.387742
3	0.553754	2	0.546478
3	0.560056	2	0.440012
3	0.573045	2	0.391042
3	0.557048	2	0.36286
3	0.559416	2	0.422512
3	0.549752	2	0.381861
3	0.57933	2	0.422114
3	0.54294	2	0.383792
3	0.539629	2	0.427949
3	0.586167	2	0.367563
3	0.589186	2	0.388287
3	0.565558	2	0.354609
3	0.585365	2	0.352521
3	0.596549	2	0.420926
3	0.589421	2	0.496663
3	0.57926	2	0.419669
3	0.568383	2	0.495042
3	0.577345	2	0.438453
3	0.594041	2	0.443737
3	0.527163	2	0.442029
3	0.616184	2	0.445841
3	0.584031	2	0.570243
3	0.60887	2	0.433948
3	0.554816	2	0.478352
3	0.575438	2	0.452441
3	0.486197	2	0.451701
3	0.503323	2	0.487938
3	0.560041	2	0.429104
3	0.498484	2	0.512231
3	0.515082	2	0.38153
3	0.503958	2	0.344227
3	0.548183	2	0.485324
3	0.523207	2	0.392786
3	0.615446	2	0.413415
3	0.542546	2	0.37721
3	0.573714	2	0.40371
3	0.498232	2	0.429524
3	0.539012	2	0.493987
3	0.51702	2	0.436486
3	0.478779	2	0.370793
3	0.599128	2	0.365437
3	0.601844	2	0.365651
3	0.557567	2	0.52716
3	0.57982	2	0.480178
3	0.616124	2	0.375782
3	0.563114	2	0.346459
3	0.527775	2	0.439834
3	0.531773	2	0.392311
3	0.562039	2	0.4245
3	0.576985	2	0.389702
3	0.584705	2	0.420346
3	0.638046	2	0.369456
3	0.506704	2	0.411693
3	0.582781	2	0.362671
3	0.600899	2	0.410713
3	0.595222	2	0.445554
3	0.579291	2	0.511296
3	0.554853	2	0.447689
3	0.536984	2	0.494605
3	0.590088	2	0.459947
3	0.568763	2	0.431538
3	0.582742	2	0.43724
3	0.577218	2	0.427954
3	0.58993	2	0.537558
3	0.530863	2	0.424382
3	0.595425	2	0.489532
3	0.512682	2	0.439914
3	0.546417	2	0.463298
3	0.572913	2	0.477233
3	0.561572	2	0.404477
3	0.571094	2	0.499852
3	0.58177	2	0.37441
3	0.576082	2	0.509881
3	0.580722	2	0.366079
3	0.590785	2	0.374055
3	0.49723	2	0.376445
3	0.535532	2	0.407783
3	0.546105	2	0.410795
3	0.537305	2	0.508269
3	0.577869	2	0.360403
3	0.52282	2	0.385055
3	0.613843	2	0.355283
3	0.569258	2	0.356383
3	0.597337	2	0.532663
3	0.556301	2	0.454008
3	0.561795	2	0.319316
3	0.529181	2	0.328739
3	0.568796	2	0.408499
3	0.596103	2	0.302734
3	0.570745	2	0.36511
3	0.561347	2	0.327489
3	0.55271	2	0.441946
3	0.538952	2	0.284746
3	0.572756	2	0.317795
3	0.517228	2	0.334313
3	0.572267	2	0.345778
3	0.535306	2	0.484608
3	0.529941	2	0.494104
3	0.553699	2	0.402409
3	0.554597	2	0.491815
3	0.525896	2	0.416685
3	0.513315	2	0.382069
3	0.498607	2	0.451538
3	0.569858	2	0.361846
3	0.565069	2	0.574625
3	0.533046	2	0.400833
3	0.560505	2	0.480131
3	0.5632	2	0.421951
3	0.60474	2	0.444182
3	0.547578	2	0.488061
3	0.591619	2	0.377821
3	0.493925	2	0.507584
3	0.553201	2	0.483992
3	0.503023	2	0.394797
3	0.531883	2	0.398727
3	0.500411	2	0.37611
3	0.45509	2	0.370071
3	0.53981	2	0.41558
3	0.518775	2	0.457862
3	0.530133	2	0.407363
3	0.618377	2	0.401616
3	0.56823	2	0.367671
3	0.559406	2	0.326555
3	0.517454	2	0.52422
3	0.534867	2	0.452287
3	0.481987	2	0.371701
3	0.472715	2	0.342649
3	0.610156	2	0.411184
3	0.560633	2	0.374305
3	0.527728	2	0.420257
3	0.547376	2	0.36671
3	0.587242	2	0.400271
3	0.56309	2	0.36837
3	0.583574	2	0.376311
3	0.508853	2	0.379126
3	0.564639	2	0.406315
3	0.585085	2	0.430465
3	0.585904	2	0.476359
3	0.604571	2	0.438508
3	0.544831	2	0.468329
3	0.594368	2	0.417893
3	0.560138	2	0.407838
3	0.542085	2	0.452212
3	0.527715	2	0.417299
3	0.537701	2	0.563642
3	0.550353	2	0.427098
3	0.541679	2	0.460444
3	0.616138	2	0.407772
3	0.567828	2	0.42338
3	0.573504	2	0.493963
3	0.539271	2	0.419706
3	0.571497	2	0.473855
3	0.53387	2	0.53899
3	0.525666	2	0.547873
3	0.562235	2	0.487738
3	0.614103	2	0.495186
3	0.521663	2	0.490885
3	0.573156	2	0.502055
3	0.609481	2	0.53037
3	0.592141	2	0.532805
3	0.538285	2	0.520403
3	0.54843	2	0.508352
3	0.559722	2	0.514861
3	0.54594	2	0.500138
3	0.577657	2	0.524409
3	0.626062	2	0.499023
3	0.541838	2	0.528567
3	0.594709	2	0.516589
3	0.507002	2	0.541939
3	0.556647	2	0.500475
3	0.534957	2	0.508185
3	0.526767	2	0.524686
3	0.540014	2	0.524945
3	0.503225	2	0.506485
3	0.590865	2	0.5276
3	0.55269	2	0.504157
3	0.521534	2	0.531368
3	0.545856	2	0.554866
3	0.524414	2	0.458194
3	0.543542	2	0.556925
3	0.55775	2	0.526975
3	0.542156	2	0.529605
3	0.507088	2	0.569378
3	0.484834	2	0.525165
3	0.529353	2	0.522314
3	0.53015	2	0.543319
3	0.542934	2	0.535394
3	0.467919	2	0.439029
3	0.506657	2	0.551645
3	0.534558	2	0.554281
3	0.536809	2	0.457661
3	0.540072	2	0.37883
3	0.511938	2	0.385113
3	0.532877	2	0.386527
3	0.470575	2	0.429394
3	0.505477	2	0.528635
3	0.496917	2	0.372122
3	0.475767	2	0.408679
3	0.564252	2	0.349229
3	0.499701	2	0.368703
3	0.567736	2	0.529995
3	0.502032	2	0.454887
3	0.496472	2	0.361698
3	0.508585	2	0.339976
3	0.511849	2	0.399215
3	0.603695	2	0.326621
3	0.558029	2	0.3854
3	0.52304	2	0.373253
3	0.541981	2	0.447525
3	0.576285	2	0.322184
3	0.514177	2	0.350461
3	0.522519	2	0.326861
3	0.478599	2	0.393011
3	0.52984	2	0.485644
3	0.556042	2	0.506775
3	0.537548	2	0.413928
3	0.563367	2	0.504883
3	0.510006	2	0.415483
3	0.572382	2	0.41067
3	0.499014	2	0.481019
3	0.520788	2	0.386235
3	0.520461	2	0.560158
3	0.5463	2	0.396861
3	0.536138	2	0.491773
3	0.550419	2	0.396215
3	0.535489	2	0.473917
3	0.532019	2	0.501895
3	0.518138	2	0.344955
3	0.467227	2	0.545202
3	0.579505	2	0.390241
3	0.551988	2	0.3837
3	0.522997	2	0.409944
3	0.576756	2	0.50319
3	0.586853	2	0.400359
3	0.591029	2	0.389003
3	0.565361	2	0.376455
3	0.528644	2	0.37789
3	0.543434	2	0.529327
3	0.553046	2	0.457471
3	0.558818	2	0.390921
3	0.601033	2	0.384293
3	0.551761	2	0.376227
3	0.566408	2	0.39262
3	0.550941	2	0.398249
3	0.526192	2	0.376632
3	0.532068	2	0.430369
3	0.542735	2	0.363631
3	0.502152	2	0.40827
3	0.485598	2	0.388097
3	0.540515	2	0.440671
3	0.544508	2	0.454351
3	0.508205	2	0.496903
3	0.586056	2	0.410402
3	0.542682	2	0.514754
3	0.549889	2	0.402834
3	0.57011	2	0.415167
3	0.57111	2	0.431267
3	0.536668	2	0.410682
3	0.539131	2	0.589373
3	0.50311	2	0.38278
3	0.572519	2	0.456631
3	0.554426	2	0.438227
3	0.547546	2	0.447597
3	0.583037	2	0.472935
3	0.51852	2	0.413108
3	0.53972	2	0.525362
3	0.503429	2	0.39785
3	0.57151	2	0.401604
3	0.501775	2	0.447346
3	0.525379	2	0.383611
3	0.491781	2	0.38154
3	0.536774	2	0.342967
3	0.456859	2	0.344798
3	0.535678	2	0.530008
3	0.600814	2	0.406044
3	0.530295	2	0.39316
3	0.556344	2	0.376088
3	0.51594	2	0.399921
3	0.571177	2	0.39622
3	0.518919	2	0.414974
3	0.546499	2	0.377023
3	0.521193	2	0.439875
3	0.512908	2	0.369292
3	0.59357	2	0.394668
3	0.563564	2	0.349567
3	0.617885	2	0.342839
3	0.543456	2	0.396304
3	0.604159	2	0.473165
3	0.553632	2	0.402967
3	0.562689	2	0.47689
3	0.597671	2	0.400914
3	0.550571	2	0.449528
3	0.548741	2	0.445106
3	0.506612	2	0.429871
3	0.513498	2	0.555536
3	0.590399	2	0.412431
3	0.54037	2	0.466405
3	0.537412	2	0.427178
3	0.558346	2	0.449212
3	0.588979	2	0.4773
3	0.478172	2	0.409068
3	0.528957	2	0.505193
3	0.529117	2	0.390065
3	0.520798	2	0.47249
3	0.574892	2	0.408312
3	0.550372	2	0.422865
3	0.59839	2	0.371071
3	0.530851	2	0.394445
3	0.592416	2	0.497682
3	0.563316	2	0.447391
3	0.513415	2	0.404387
3	0.561703	2	0.369785
3	0.542353	2	0.347901
3	0.549544	2	0.38617
3	0.599679	2	0.44157
3	0.553629	2	0.358161
3	0.511046	2	0.366489
3	0.53103	2	0.375174
3	0.537837	2	0.385668
3	0.506941	2	0.382959
3	0.562468	2	0.423425
3	0.569349	2	0.437788
3	0.538975	2	0.486202
3	0.5506	2	0.39743
3	0.547577	2	0.478288
3	0.511791	2	0.384722
3	0.505849	2	0.422
3	0.552399	2	0.400056
3	0.538396	2	0.445345
3	0.552872	2	0.551842
3	0.497213	2	0.338607
3	0.511209	2	0.411467
3	0.518224	2	0.420165
3	0.529859	2	0.431353
3	0.571611	2	0.436936
3	0.597612	2	0.414515
3	0.580528	2	0.504183
3	0.601084	2	0.402548
3	0.582475	2	0.428717
3	0.59506	2	0.448427
3	0.574304	2	0.408215
3	0.551055	2	0.425948
3	0.57088	2	0.522906
3	0.582995	2	0.426777
3	0.588424	2	0.44064
3	0.609085	2	0.403584
3	0.582318	2	0.398511
3	0.560341	2	0.429707
3	0.506439	2	0.459014
3	0.513125	2	0.413683
3	0.536358	2	0.422168
3	0.550703	2	0.403255
3	0.543697	2	0.393765
3	0.520204	2	0.395721
3	0.549025	2	0.452699
3	0.532557	2	0.419454
3	0.515147	2	0.504276
3	0.559175	2	0.420227
3	0.541448	2	0.481693
3	0.554723	2	0.405831
3	0.529525	2	0.451973
3	0.548689	2	0.440739
3	0.564822	2	0.470324
3	0.547297	2	0.577647
3	0.541808	2	0.435424
3	0.559612	2	0.451416
3	0.541768	2	0.458927
3	0.485967	2	0.480656
3	0.54451	2	0.45532
3	0.561633	2	0.453609
3	0.563466	2	0.524751
3	0.536918	2	0.523985
3	0.54705	2	0.535431
3	0.544064	2	0.506198
3	0.53852	2	0.510131
3	0.521288	2	0.478033
3	0.448123	2	0.434045
3	0.498237	2	0.529567
3	0.543141	2	0.491707
3	0.531271	2	0.472248
3	0.554347	2	0.523355
3	0.480782	2	0.544426
3	0.521707	2	0.500744
3	0.512823	2	0.473107
3	0.487564	2	0.510059
3	0.536497	2	0.511081
3	0.577844	2	0.504899
3	0.557236	2	0.515231
3	0.54065	2	0.420887
3	0.574351	2	0.488826
3	0.52334	2	0.50586
3	0.584974	2	0.497305
3	0.562574	2	0.488412
3	0.580997	2	0.524712
3	0.603207	2	0.502884
3	0.552176	2	0.5347
3	0.606518	2	0.550544
3	0.544961	2	0.520517
3	0.61907	2	0.491473
3	0.462094	2	0.528887
3	0.582195	2	0.490385
3	0.574321	2	0.473437
3	0.548526	2	0.543396
3	0.585208	2	0.527834
3	0.613236	2	0.402917
3	0.541734	2	0.393179
3	0.585942	2	0.377828
3	0.532818	2	0.551763
3	0.568824	2	0.453069
3	0.604526	2	0.407634
3	0.569285	2	0.384492
3	0.606774	2	0.426333
3	0.541248	2	0.357877
3	0.592698	2	0.399913
3	0.557747	2	0.375311
3	0.536693	2	0.472053
3	0.549391	2	0.376701
3	0.565531	2	0.373511
3	0.619481	2	0.374801
3	0.551032	2	0.402108
3	0.543102	2	0.47392
3	0.534243	2	0.489663
3	0.572438	2	0.412482
3	0.592756	2	0.481969
3	0.547718	2	0.420001
3	0.623878	2	0.401565
3	0.538343	2	0.430787
3	0.626471	2	0.434386
3	0.580304	2	0.583906
3	0.525471	2	0.390723
3	0.535977	2	0.485075
3	0.572288	2	0.453476
3	0.577071	2	0.470231
3	0.561985	2	0.50505
3	0.572968	2	0.448204
3	0.520581	2	0.526724
3	0.576289	2	0.3814
3	0.557289	2	0.36627
3	0.584656	2	0.579133
3	0.548557	2	0.506912
3	0.565228	2	0.390241
3	0.526183	2	0.377979
3	0.541126	2	0.428527
3	0.548586	2	0.385412
3	0.524684	2	0.392246
3	0.516317	2	0.382074
3	0.543924	2	0.455219
3	0.540376	2	0.399521
3	0.573763	2	0.417401
3	0.551247	2	0.361215
3	0.594445	2	0.431043
3	0.536989	2	0.471512
3	0.590176	2	0.494095
3	0.467432	2	0.448198
3	0.516596	2	0.518752
3	0.548974	2	0.458789
3	0.530095	2	0.431376
3	0.499612	2	0.464916
3	0.477986	2	0.42332
3	0.469502	2	0.597199
3	0.521219	2	0.422798
3	0.530388	2	0.51433
3	0.481608	2	0.446074
3	0.542876	2	0.46498
3	0.509052	2	0.499123
3	0.524703	2	0.42475
3	0.522334	2	0.527056
3	0.499838	2	0.335445
3	0.466461	2	0.535921
3	0.555718	2	0.466152
3	0.506633	2	0.371103
3	0.531498	2	0.342957
3	0.491492	2	0.417338
3	0.550642	2	0.349917
3	0.554079	2	0.373995
3	0.545451	2	0.364454
3	0.49913	2	0.434827
3	0.466004	2	0.33651
3	0.525346	2	0.362275
3	0.503768	2	0.321161
3	0.486007	2	0.339962
3	0.531727	2	0.449409
3	0.522411	2	0.496266
3	0.51118	2	0.413022
3	0.535436	2	0.49867
3	0.530561	2	0.436407
3	0.571372	2	0.413167
3	0.544285	2	0.435174
3	0.578137	2	0.411569
3	0.518104	2	0.581219
3	0.549062	2	0.396391
3	0.507405	2	0.490137
3	0.498751	2	0.426218
3	0.554841	2	0.44593
3	0.493883	2	0.483537
3	0.564439	2	0.388736
3	0.43946	2	0.518998
3	0.527241	2	0.544663
3	0.47477	2	0.47875
3	0.477975	2	0.362228
3	0.517572	2	0.326739
3	0.537165	2	0.40633
3	0.481946	2	0.379273
3	0.50557	2	0.389908
3	0.481232	2	0.367585
3	0.48773	2	0.412908
3	0.493459	2	0.347416
3	0.539441	2	0.355957
3	0.49072	2	0.350966
3	0.538237	2	0.359287
3	0.481193	2	0.446054
3	0.512895	2	0.501516
3	0.539305	2	0.429008
3	0.551266	2	0.494288
3	0.470002	2	0.415494
3	0.558302	2	0.377858
3	0.532775	2	0.450944
3	0.485719	2	0.407772
3	0.540794	2	0.580188
4	0.523553	2	0.389091
4	0.553583	2	0.48537
4	0.581562	2	0.40161
4	0.504962	2	0.445295
4	0.51756	2	0.495902
4	0.526965	2	0.391652
4	0.530642	2	0.487512
4	0.531744	2	0.499202
4	0.538351	2	0.554869
4	0.570524	2	0.541365
4	0.534811	2	0.47997
4	0.503987	2	0.520812
4	0.499591	2	0.593898
4	0.523697	2	0.52576
4	0.564989	2	0.498046
4	0.543168	2	0.523909
4	0.573167	2	0.54927
4	0.558426	2	0.551789
4	0.543773	2	0.550678
4	0.549527	2	0.50786
4	0.586003	2	0.531431
4	0.512099	2	0.52939
4	0.560742	2	0.512344
4	0.536673	2	0.513578
4	0.644889	2	0.560806
4	0.537221	2	0.521188
4	0.514399	2	0.55354
4	0.545821	2	0.532365
4	0.550911	2	0.506611
4	0.549786	2	0.487292
4	0.51427	2	0.54448
4	0.571562	2	0.537926
4	0.534246	2	0.494331
4	0.575484	2	0.575977
4	0.547682	2	0.53206
4	0.543412	2	0.475045
4	0.56431	2	0.455684
4	0.518743	2	0.420259
4	0.553013	2	0.463514
4	0.54023	2	0.473393
4	0.522361	2	0.460514
4	0.564863	2	0.485794
4	0.547776	2	0.441424
4	0.55574	2	0.458425
4	0.581044	2	0.457369
4	0.523651	2	0.498708
4	0.540393	2	0.417942
4	0.55343	2	0.498962
4	0.610582	2	0.465795
4	0.534951	2	0.510514
4	0.48349	2	0.436046
4	0.568868	2	0.501375
4	0.526421	2	0.488064
4	0.518041	2	0.50094
4	0.516106	2	0.566255
4	0.472648	2	0.491652
4	0.555067	2	0.476536
4	0.563355	2	0.486515
4	0.54296	2	0.497231
4	0.512745	2	0.503042
4	0.564183	2	0.474556
4	0.495606	2	0.547649
4	0.562899	2	0.357429
4	0.592601	2	0.430484
4	0.481382	2	0.328177
4	0.465369	2	0.38958
4	0.513996	2	0.34032
4	0.512603	2	0.470847
4	0.541379	2	0.353194
4	0.519196	2	0.333293
4	0.480987	2	0.367138
4	0.491859	2	0.411721
4	0.466086	2	0.50349
4	0.530993	2	0.486812
4	0.513809	2	0.442274
4	0.550068	2	0.482937
4	0.457431	2	0.432589
4	0.425705	2	0.393209
4	0.517451	2	0.448972
4	0.438264	2	0.365486
4	0.472648	2	0.567426
4	0.49384	2	0.40368
4	0.51914	2	0.489687
4	0.545394	2	0.416718
4	0.493628	2	0.448984
4	0.517108	2	0.508141
4	0.552655	2	0.380308
4	0.487386	2	0.498327
4	0.548473	2	0.398679
4	0.485134	2	0.31747
4	0.660772	2	0.381867
4	0.466451	2	0.333987
4	0.485661	2	0.397053
4	0.516315	2	0.309755
4	0.510274	2	0.339207
[truncated: 2,744 more rows]

## Sheet: Figure _2e
symbol	cell	expression	dpt	cluster
Isl1	c1run1_03_X_isl1.e8.5	5.71801	0.0867276	4
Mef2c	c1run1_03_X_isl1.e8.5	10.3614	0.0867276	4
Nkx2-5	c1run1_03_X_isl1.e8.5	0	0.0867276	4
Ankrd1	c1run1_03_X_isl1.e8.5	0	0.0867276	4
Myocd	c1run1_03_X_isl1.e8.5	0	0.0867276	4
Smyd1	c1run1_03_X_isl1.e8.5	0	0.0867276	4
Gata2	c1run1_03_X_isl1.e8.5	0	0.0867276	4
Hand1	c1run1_03_X_isl1.e8.5	0	0.0867276	4
Hhex	c1run1_03_X_isl1.e8.5	0	0.0867276	4
Hoxa7	c1run1_03_X_isl1.e8.5	0	0.0867276	4
Hoxa9	c1run1_03_X_isl1.e8.5	0	0.0867276	4
Hoxb6	c1run1_03_X_isl1.e8.5	0	0.0867276	4
Hoxc8	c1run1_03_X_isl1.e8.5	0	0.0867276	4
Msx1	c1run1_03_X_isl1.e8.5	0	0.0867276	4
Pitx1	c1run1_03_X_isl1.e8.5	0	0.0867276	4
Nkx1-2	c1run1_03_X_isl1.e8.5	0	0.0867276	4
Snai1	c1run1_03_X_isl1.e8.5	0	0.0867276	4
Tbx3	c1run1_03_X_isl1.e8.5	0.930486	0.0867276	4
Tbx4	c1run1_03_X_isl1.e8.5	0	0.0867276	4
Ets2	c1run1_03_X_isl1.e8.5	0	0.0867276	4
Sall4	c1run1_03_X_isl1.e8.5	10.6007	0.0867276	4
Isl1	c1run1_05_X_isl1.e8.5	6.49904	0.0175002	5
Mef2c	c1run1_05_X_isl1.e8.5	0	0.0175002	5
Nkx2-5	c1run1_05_X_isl1.e8.5	0	0.0175002	5
Ankrd1	c1run1_05_X_isl1.e8.5	0	0.0175002	5
Myocd	c1run1_05_X_isl1.e8.5	0	0.0175002	5
Smyd1	c1run1_05_X_isl1.e8.5	0	0.0175002	5
Gata2	c1run1_05_X_isl1.e8.5	0	0.0175002	5
Hand1	c1run1_05_X_isl1.e8.5	9.45591	0.0175002	5
Hhex	c1run1_05_X_isl1.e8.5	4.4111	0.0175002	5
Hoxa7	c1run1_05_X_isl1.e8.5	2.19471	0.0175002	5
Hoxa9	c1run1_05_X_isl1.e8.5	8.89022	0.0175002	5
Hoxb6	c1run1_05_X_isl1.e8.5	8.07971	0.0175002	5
Hoxc8	c1run1_05_X_isl1.e8.5	8.06693	0.0175002	5
Msx1	c1run1_05_X_isl1.e8.5	3.02786	0.0175002	5
Pitx1	c1run1_05_X_isl1.e8.5	7.2636	0.0175002	5
Nkx1-2	c1run1_05_X_isl1.e8.5	1.13268	0.0175002	5
Snai1	c1run1_05_X_isl1.e8.5	8.54346	0.0175002	5
Tbx3	c1run1_05_X_isl1.e8.5	7.75274	0.0175002	5
Tbx4	c1run1_05_X_isl1.e8.5	9.992	0.0175002	5
Ets2	c1run1_05_X_isl1.e8.5	5.70831	0.0175002	5
Sall4	c1run1_05_X_isl1.e8.5	12.2723	0.0175002	5
Isl1	c1run1_14_X_isl1.e8.5	9.03933	0.0836178	4
Mef2c	c1run1_14_X_isl1.e8.5	8.11423	0.0836178	4
Nkx2-5	c1run1_14_X_isl1.e8.5	0	0.0836178	4
Ankrd1	c1run1_14_X_isl1.e8.5	0	0.0836178	4
Myocd	c1run1_14_X_isl1.e8.5	0.863358	0.0836178	4
Smyd1	c1run1_14_X_isl1.e8.5	0	0.0836178	4
Gata2	c1run1_14_X_isl1.e8.5	0	0.0836178	4
Hand1	c1run1_14_X_isl1.e8.5	0	0.0836178	4
Hhex	c1run1_14_X_isl1.e8.5	0	0.0836178	4
Hoxa7	c1run1_14_X_isl1.e8.5	0	0.0836178	4
Hoxa9	c1run1_14_X_isl1.e8.5	0	0.0836178	4
Hoxb6	c1run1_14_X_isl1.e8.5	0	0.0836178	4
Hoxc8	c1run1_14_X_isl1.e8.5	1.78986	0.0836178	4
Msx1	c1run1_14_X_isl1.e8.5	6.159	0.0836178	4
Pitx1	c1run1_14_X_isl1.e8.5	0	0.0836178	4
Nkx1-2	c1run1_14_X_isl1.e8.5	0	0.0836178	4
Snai1	c1run1_14_X_isl1.e8.5	8.473	0.0836178	4
Tbx3	c1run1_14_X_isl1.e8.5	8.24075	0.0836178	4
Tbx4	c1run1_14_X_isl1.e8.5	0	0.0836178	4
Ets2	c1run1_14_X_isl1.e8.5	6.97187	0.0836178	4
Sall4	c1run1_14_X_isl1.e8.5	11.8324	0.0836178	4
Isl1	c1run1_16_X_isl1.e8.5	0	0.0866524	4
Mef2c	c1run1_16_X_isl1.e8.5	0	0.0866524	4
Nkx2-5	c1run1_16_X_isl1.e8.5	0	0.0866524	4
Ankrd1	c1run1_16_X_isl1.e8.5	0	0.0866524	4
Myocd	c1run1_16_X_isl1.e8.5	0	0.0866524	4
Smyd1	c1run1_16_X_isl1.e8.5	0	0.0866524	4
Gata2	c1run1_16_X_isl1.e8.5	0	0.0866524	4
Hand1	c1run1_16_X_isl1.e8.5	0	0.0866524	4
Hhex	c1run1_16_X_isl1.e8.5	0	0.0866524	4
Hoxa7	c1run1_16_X_isl1.e8.5	0	0.0866524	4
Hoxa9	c1run1_16_X_isl1.e8.5	0	0.0866524	4
Hoxb6	c1run1_16_X_isl1.e8.5	0	0.0866524	4
Hoxc8	c1run1_16_X_isl1.e8.5	0	0.0866524	4
Msx1	c1run1_16_X_isl1.e8.5	1.71144	0.0866524	4
Pitx1	c1run1_16_X_isl1.e8.5	0	0.0866524	4
Nkx1-2	c1run1_16_X_isl1.e8.5	0	0.0866524	4
Snai1	c1run1_16_X_isl1.e8.5	0	0.0866524	4
Tbx3	c1run1_16_X_isl1.e8.5	0	0.0866524	4
Tbx4	c1run1_16_X_isl1.e8.5	5.39052	0.0866524	4
Ets2	c1run1_16_X_isl1.e8.5	0	0.0866524	4
Sall4	c1run1_16_X_isl1.e8.5	12.6798	0.0866524	4
Isl1	c1run1_17_X_isl1.e8.5	9.30038	0.00960537	5
Mef2c	c1run1_17_X_isl1.e8.5	5.57673	0.00960537	5
Nkx2-5	c1run1_17_X_isl1.e8.5	0	0.00960537	5
Ankrd1	c1run1_17_X_isl1.e8.5	0	0.00960537	5
Myocd	c1run1_17_X_isl1.e8.5	0	0.00960537	5
Smyd1	c1run1_17_X_isl1.e8.5	0	0.00960537	5
Gata2	c1run1_17_X_isl1.e8.5	0	0.00960537	5
Hand1	c1run1_17_X_isl1.e8.5	9.06195	0.00960537	5
Hhex	c1run1_17_X_isl1.e8.5	0	0.00960537	5
Hoxa7	c1run1_17_X_isl1.e8.5	7.73178	0.00960537	5
Hoxa9	c1run1_17_X_isl1.e8.5	5.8926	0.00960537	5
Hoxb6	c1run1_17_X_isl1.e8.5	6.86442	0.00960537	5
Hoxc8	c1run1_17_X_isl1.e8.5	6.81538	0.00960537	5
Msx1	c1run1_17_X_isl1.e8.5	8.494	0.00960537	5
Pitx1	c1run1_17_X_isl1.e8.5	8.29375	0.00960537	5
Nkx1-2	c1run1_17_X_isl1.e8.5	7.43987	0.00960537	5
Snai1	c1run1_17_X_isl1.e8.5	8.98643	0.00960537	5
Tbx3	c1run1_17_X_isl1.e8.5	10.0323	0.00960537	5
Tbx4	c1run1_17_X_isl1.e8.5	8.83064	0.00960537	5
Ets2	c1run1_17_X_isl1.e8.5	9.08971	0.00960537	5
Sall4	c1run1_17_X_isl1.e8.5	11.5916	0.00960537	5
Isl1	c1run1_19_X_isl1.e8.5	7.85417	0.0245135	5
Mef2c	c1run1_19_X_isl1.e8.5	0	0.0245135	5
Nkx2-5	c1run1_19_X_isl1.e8.5	0	0.0245135	5
Ankrd1	c1run1_19_X_isl1.e8.5	0	0.0245135	5
Myocd	c1run1_19_X_isl1.e8.5	0	0.0245135	5
Smyd1	c1run1_19_X_isl1.e8.5	0	0.0245135	5
Gata2	c1run1_19_X_isl1.e8.5	7.89898	0.0245135	5
Hand1	c1run1_19_X_isl1.e8.5	9.66717	0.0245135	5
Hhex	c1run1_19_X_isl1.e8.5	0	0.0245135	5
Hoxa7	c1run1_19_X_isl1.e8.5	4.03679	0.0245135	5
Hoxa9	c1run1_19_X_isl1.e8.5	7.7051	0.0245135	5
Hoxb6	c1run1_19_X_isl1.e8.5	0	0.0245135	5
Hoxc8	c1run1_19_X_isl1.e8.5	0	0.0245135	5
Msx1	c1run1_19_X_isl1.e8.5	8.58756	0.0245135	5
Pitx1	c1run1_19_X_isl1.e8.5	6.73415	0.0245135	5
Nkx1-2	c1run1_19_X_isl1.e8.5	6.75597	0.0245135	5
Snai1	c1run1_19_X_isl1.e8.5	8.45383	0.0245135	5
Tbx3	c1run1_19_X_isl1.e8.5	7.90876	0.0245135	5
Tbx4	c1run1_19_X_isl1.e8.5	10.133	0.0245135	5
Ets2	c1run1_19_X_isl1.e8.5	2.08573	0.0245135	5
Sall4	c1run1_19_X_isl1.e8.5	12.2425	0.0245135	5
Isl1	c1run1_20_X_isl1.e8.5	7.23458	0.162173	2
Mef2c	c1run1_20_X_isl1.e8.5	12.441	0.162173	2
Nkx2-5	c1run1_20_X_isl1.e8.5	6.21649	0.162173	2
Ankrd1	c1run1_20_X_isl1.e8.5	0	0.162173	2
Myocd	c1run1_20_X_isl1.e8.5	10.7152	0.162173	2
Smyd1	c1run1_20_X_isl1.e8.5	0	0.162173	2
Gata2	c1run1_20_X_isl1.e8.5	1.28597	0.162173	2
Hand1	c1run1_20_X_isl1.e8.5	0	0.162173	2
Hhex	c1run1_20_X_isl1.e8.5	0	0.162173	2
Hoxa7	c1run1_20_X_isl1.e8.5	0	0.162173	2
Hoxa9	c1run1_20_X_isl1.e8.5	0	0.162173	2
Hoxb6	c1run1_20_X_isl1.e8.5	0	0.162173	2
Hoxc8	c1run1_20_X_isl1.e8.5	0	0.162173	2
Msx1	c1run1_20_X_isl1.e8.5	0	0.162173	2
Pitx1	c1run1_20_X_isl1.e8.5	0	0.162173	2
Nkx1-2	c1run1_20_X_isl1.e8.5	0	0.162173	2
Snai1	c1run1_20_X_isl1.e8.5	0	0.162173	2
Tbx3	c1run1_20_X_isl1.e8.5	10.4294	0.162173	2
Tbx4	c1run1_20_X_isl1.e8.5	0	0.162173	2
Ets2	c1run1_20_X_isl1.e8.5	0	0.162173	2
Sall4	c1run1_20_X_isl1.e8.5	10.2955	0.162173	2
Isl1	c1run1_21_X_isl1.e8.5	7.73872	0.0152496	5
Mef2c	c1run1_21_X_isl1.e8.5	0	0.0152496	5
Nkx2-5	c1run1_21_X_isl1.e8.5	0	0.0152496	5
Ankrd1	c1run1_21_X_isl1.e8.5	0	0.0152496	5
Myocd	c1run1_21_X_isl1.e8.5	0.828542	0.0152496	5
Smyd1	c1run1_21_X_isl1.e8.5	0	0.0152496	5
Gata2	c1run1_21_X_isl1.e8.5	0	0.0152496	5
Hand1	c1run1_21_X_isl1.e8.5	10.6461	0.0152496	5
Hhex	c1run1_21_X_isl1.e8.5	0	0.0152496	5
Hoxa7	c1run1_21_X_isl1.e8.5	5.82412	0.0152496	5
Hoxa9	c1run1_21_X_isl1.e8.5	6.43209	0.0152496	5
Hoxb6	c1run1_21_X_isl1.e8.5	6.06502	0.0152496	5
Hoxc8	c1run1_21_X_isl1.e8.5	7.14401	0.0152496	5
Msx1	c1run1_21_X_isl1.e8.5	8.85621	0.0152496	5
Pitx1	c1run1_21_X_isl1.e8.5	5.99655	0.0152496	5
Nkx1-2	c1run1_21_X_isl1.e8.5	6.80674	0.0152496	5
Snai1	c1run1_21_X_isl1.e8.5	7.60713	0.0152496	5
Tbx3	c1run1_21_X_isl1.e8.5	9.7929	0.0152496	5
Tbx4	c1run1_21_X_isl1.e8.5	9.52006	0.0152496	5
Ets2	c1run1_21_X_isl1.e8.5	0	0.0152496	5
Sall4	c1run1_21_X_isl1.e8.5	11.575	0.0152496	5
Isl1	c1run1_22_X_isl1.e8.5	1.16282	0.087829	4
Mef2c	c1run1_22_X_isl1.e8.5	9.5181	0.087829	4
Nkx2-5	c1run1_22_X_isl1.e8.5	0	0.087829	4
Ankrd1	c1run1_22_X_isl1.e8.5	0	0.087829	4
Myocd	c1run1_22_X_isl1.e8.5	5.5497	0.087829	4
Smyd1	c1run1_22_X_isl1.e8.5	0	0.087829	4
Gata2	c1run1_22_X_isl1.e8.5	0	0.087829	4
Hand1	c1run1_22_X_isl1.e8.5	0	0.087829	4
Hhex	c1run1_22_X_isl1.e8.5	0	0.087829	4
Hoxa7	c1run1_22_X_isl1.e8.5	0	0.087829	4
Hoxa9	c1run1_22_X_isl1.e8.5	0	0.087829	4
Hoxb6	c1run1_22_X_isl1.e8.5	0	0.087829	4
Hoxc8	c1run1_22_X_isl1.e8.5	0	0.087829	4
Msx1	c1run1_22_X_isl1.e8.5	1.16282	0.087829	4
Pitx1	c1run1_22_X_isl1.e8.5	0	0.087829	4
Nkx1-2	c1run1_22_X_isl1.e8.5	0	0.087829	4
Snai1	c1run1_22_X_isl1.e8.5	0	0.087829	4
Tbx3	c1run1_22_X_isl1.e8.5	0	0.087829	4
Tbx4	c1run1_22_X_isl1.e8.5	0	0.087829	4
Ets2	c1run1_22_X_isl1.e8.5	0	0.087829	4
Sall4	c1run1_22_X_isl1.e8.5	9.50093	0.087829	4
Isl1	c1run1_28_X_isl1.e8.5	9.58486	0.0521195	5
Mef2c	c1run1_28_X_isl1.e8.5	9.12372	0.0521195	5
Nkx2-5	c1run1_28_X_isl1.e8.5	1.97764	0.0521195	5
Ankrd1	c1run1_28_X_isl1.e8.5	0	0.0521195	5
Myocd	c1run1_28_X_isl1.e8.5	7.52869	0.0521195	5
Smyd1	c1run1_28_X_isl1.e8.5	0	0.0521195	5
Gata2	c1run1_28_X_isl1.e8.5	4.32914	0.0521195	5
Hand1	c1run1_28_X_isl1.e8.5	1.30407	0.0521195	5
Hhex	c1run1_28_X_isl1.e8.5	6.32803	0.0521195	5
Hoxa7	c1run1_28_X_isl1.e8.5	7.92498	0.0521195	5
Hoxa9	c1run1_28_X_isl1.e8.5	6.03665	0.0521195	5
Hoxb6	c1run1_28_X_isl1.e8.5	6.3014	0.0521195	5
Hoxc8	c1run1_28_X_isl1.e8.5	4.21963	0.0521195	5
Msx1	c1run1_28_X_isl1.e8.5	8.71837	0.0521195	5
Pitx1	c1run1_28_X_isl1.e8.5	3.4963	0.0521195	5
Nkx1-2	c1run1_28_X_isl1.e8.5	5.86544	0.0521195	5
Snai1	c1run1_28_X_isl1.e8.5	5.39708	0.0521195	5
Tbx3	c1run1_28_X_isl1.e8.5	7.15023	0.0521195	5
Tbx4	c1run1_28_X_isl1.e8.5	7.90981	0.0521195	5
Ets2	c1run1_28_X_isl1.e8.5	0	0.0521195	5
Sall4	c1run1_28_X_isl1.e8.5	9.53716	0.0521195	5
Isl1	c1run1_30_X_isl1.e8.5	0	0.0488557	5
Mef2c	c1run1_30_X_isl1.e8.5	0	0.0488557	5
Nkx2-5	c1run1_30_X_isl1.e8.5	0	0.0488557	5
Ankrd1	c1run1_30_X_isl1.e8.5	0	0.0488557	5
Myocd	c1run1_30_X_isl1.e8.5	4.70664	0.0488557	5
Smyd1	c1run1_30_X_isl1.e8.5	0	0.0488557	5
Gata2	c1run1_30_X_isl1.e8.5	1.04865	0.0488557	5
Hand1	c1run1_30_X_isl1.e8.5	1.04865	0.0488557	5
Hhex	c1run1_30_X_isl1.e8.5	0	0.0488557	5
Hoxa7	c1run1_30_X_isl1.e8.5	3.91598	0.0488557	5
Hoxa9	c1run1_30_X_isl1.e8.5	0	0.0488557	5
Hoxb6	c1run1_30_X_isl1.e8.5	7.07798	0.0488557	5
Hoxc8	c1run1_30_X_isl1.e8.5	7.66508	0.0488557	5
Msx1	c1run1_30_X_isl1.e8.5	8.06113	0.0488557	5
Pitx1	c1run1_30_X_isl1.e8.5	0	0.0488557	5
Nkx1-2	c1run1_30_X_isl1.e8.5	9.06131	0.0488557	5
Snai1	c1run1_30_X_isl1.e8.5	0	0.0488557	5
Tbx3	c1run1_30_X_isl1.e8.5	7.20879	0.0488557	5
Tbx4	c1run1_30_X_isl1.e8.5	0	0.0488557	5
Ets2	c1run1_30_X_isl1.e8.5	0	0.0488557	5
Sall4	c1run1_30_X_isl1.e8.5	11.8136	0.0488557	5
Isl1	c1run1_31_X_isl1.e8.5	6.20972	0.0806761	4
Mef2c	c1run1_31_X_isl1.e8.5	0.871608	0.0806761	4
Nkx2-5	c1run1_31_X_isl1.e8.5	0	0.0806761	4
Ankrd1	c1run1_31_X_isl1.e8.5	0	0.0806761	4
Myocd	c1run1_31_X_isl1.e8.5	1.4111	0.0806761	4
Smyd1	c1run1_31_X_isl1.e8.5	0	0.0806761	4
Gata2	c1run1_31_X_isl1.e8.5	0.871608	0.0806761	4
Hand1	c1run1_31_X_isl1.e8.5	0	0.0806761	4
Hhex	c1run1_31_X_isl1.e8.5	6.07416	0.0806761	4
Hoxa7	c1run1_31_X_isl1.e8.5	0	0.0806761	4
Hoxa9	c1run1_31_X_isl1.e8.5	0	0.0806761	4
Hoxb6	c1run1_31_X_isl1.e8.5	0	0.0806761	4
Hoxc8	c1run1_31_X_isl1.e8.5	0	0.0806761	4
Msx1	c1run1_31_X_isl1.e8.5	3.34009	0.0806761	4
Pitx1	c1run1_31_X_isl1.e8.5	0	0.0806761	4
Nkx1-2	c1run1_31_X_isl1.e8.5	0	0.0806761	4
Snai1	c1run1_31_X_isl1.e8.5	3.65716	0.0806761	4
Tbx3	c1run1_31_X_isl1.e8.5	0	0.0806761	4
Tbx4	c1run1_31_X_isl1.e8.5	0.871608	0.0806761	4
Ets2	c1run1_31_X_isl1.e8.5	0	0.0806761	4
Sall4	c1run1_31_X_isl1.e8.5	11.698	0.0806761	4
Isl1	c1run1_34_X_isl1.e8.5	4.55959	0.0847551	4
Mef2c	c1run1_34_X_isl1.e8.5	0	0.0847551	4
Nkx2-5	c1run1_34_X_isl1.e8.5	0	0.0847551	4
Ankrd1	c1run1_34_X_isl1.e8.5	0	0.0847551	4
Myocd	c1run1_34_X_isl1.e8.5	0	0.0847551	4
Smyd1	c1run1_34_X_isl1.e8.5	0	0.0847551	4
Gata2	c1run1_34_X_isl1.e8.5	0	0.0847551	4
Hand1	c1run1_34_X_isl1.e8.5	0	0.0847551	4
Hhex	c1run1_34_X_isl1.e8.5	0	0.0847551	4
Hoxa7	c1run1_34_X_isl1.e8.5	0	0.0847551	4
Hoxa9	c1run1_34_X_isl1.e8.5	0	0.0847551	4
Hoxb6	c1run1_34_X_isl1.e8.5	0	0.0847551	4
Hoxc8	c1run1_34_X_isl1.e8.5	0	0.0847551	4
Msx1	c1run1_34_X_isl1.e8.5	9.2434	0.0847551	4
Pitx1	c1run1_34_X_isl1.e8.5	0	0.0847551	4
Nkx1-2	c1run1_34_X_isl1.e8.5	0	0.0847551	4
Snai1	c1run1_34_X_isl1.e8.5	0	0.0847551	4
Tbx3	c1run1_34_X_isl1.e8.5	7.4977	0.0847551	4
Tbx4	c1run1_34_X_isl1.e8.5	0	0.0847551	4
Ets2	c1run1_34_X_isl1.e8.5	0.546808	0.0847551	4
Sall4	c1run1_34_X_isl1.e8.5	10.933	0.0847551	4
Isl1	c1run1_35_X_isl1.e8.5	7.30439	0.0152765	5
Mef2c	c1run1_35_X_isl1.e8.5	0	0.0152765	5
Nkx2-5	c1run1_35_X_isl1.e8.5	0	0.0152765	5
Ankrd1	c1run1_35_X_isl1.e8.5	0	0.0152765	5
Myocd	c1run1_35_X_isl1.e8.5	0	0.0152765	5
Smyd1	c1run1_35_X_isl1.e8.5	0	0.0152765	5
Gata2	c1run1_35_X_isl1.e8.5	0	0.0152765	5
Hand1	c1run1_35_X_isl1.e8.5	9.46241	0.0152765	5
Hhex	c1run1_35_X_isl1.e8.5	4.80525	0.0152765	5
Hoxa7	c1run1_35_X_isl1.e8.5	0	0.0152765	5
Hoxa9	c1run1_35_X_isl1.e8.5	8.3525	0.0152765	5
Hoxb6	c1run1_35_X_isl1.e8.5	6.8904	0.0152765	5
Hoxc8	c1run1_35_X_isl1.e8.5	2.77835	0.0152765	5
Msx1	c1run1_35_X_isl1.e8.5	8.56388	0.0152765	5
Pitx1	c1run1_35_X_isl1.e8.5	5.02891	0.0152765	5
Nkx1-2	c1run1_35_X_isl1.e8.5	0	0.0152765	5
Snai1	c1run1_35_X_isl1.e8.5	3.00591	0.0152765	5
Tbx3	c1run1_35_X_isl1.e8.5	9.94485	0.0152765	5
Tbx4	c1run1_35_X_isl1.e8.5	9.74849	0.0152765	5
Ets2	c1run1_35_X_isl1.e8.5	0	0.0152765	5
Sall4	c1run1_35_X_isl1.e8.5	10.9637	0.0152765	5
Isl1	c1run1_36_X_isl1.e8.5	0.794262	0.0522147	5
Mef2c	c1run1_36_X_isl1.e8.5	1.30356	0.0522147	5
Nkx2-5	c1run1_36_X_isl1.e8.5	0	0.0522147	5
Ankrd1	c1run1_36_X_isl1.e8.5	0	0.0522147	5
Myocd	c1run1_36_X_isl1.e8.5	0	0.0522147	5
Smyd1	c1run1_36_X_isl1.e8.5	0	0.0522147	5
Gata2	c1run1_36_X_isl1.e8.5	8.97705	0.0522147	5
Hand1	c1run1_36_X_isl1.e8.5	1.30356	0.0522147	5
Hhex	c1run1_36_X_isl1.e8.5	0	0.0522147	5
Hoxa7	c1run1_36_X_isl1.e8.5	4.5642	0.0522147	5
Hoxa9	c1run1_36_X_isl1.e8.5	5.15003	0.0522147	5
Hoxb6	c1run1_36_X_isl1.e8.5	5.02548	0.0522147	5
Hoxc8	c1run1_36_X_isl1.e8.5	6.35334	0.0522147	5
Msx1	c1run1_36_X_isl1.e8.5	0	0.0522147	5
Pitx1	c1run1_36_X_isl1.e8.5	1.30356	0.0522147	5
Nkx1-2	c1run1_36_X_isl1.e8.5	8.36596	0.0522147	5
Snai1	c1run1_36_X_isl1.e8.5	2.22372	0.0522147	5
Tbx3	c1run1_36_X_isl1.e8.5	4.65697	0.0522147	5
Tbx4	c1run1_36_X_isl1.e8.5	0.794262	0.0522147	5
Ets2	c1run1_36_X_isl1.e8.5	0	0.0522147	5
Sall4	c1run1_36_X_isl1.e8.5	10.6617	0.0522147	5
Isl1	c1run1_37_X_isl1.e8.5	7.0481	0.0201065	5
Mef2c	c1run1_37_X_isl1.e8.5	8.55512	0.0201065	5
Nkx2-5	c1run1_37_X_isl1.e8.5	0	0.0201065	5
Ankrd1	c1run1_37_X_isl1.e8.5	0	0.0201065	5
Myocd	c1run1_37_X_isl1.e8.5	0	0.0201065	5
Smyd1	c1run1_37_X_isl1.e8.5	0	0.0201065	5
Gata2	c1run1_37_X_isl1.e8.5	0	0.0201065	5
Hand1	c1run1_37_X_isl1.e8.5	7.47157	0.0201065	5
Hhex	c1run1_37_X_isl1.e8.5	0	0.0201065	5
Hoxa7	c1run1_37_X_isl1.e8.5	6.47303	0.0201065	5
Hoxa9	c1run1_37_X_isl1.e8.5	8.92522	0.0201065	5
Hoxb6	c1run1_37_X_isl1.e8.5	7.84048	0.0201065	5
Hoxc8	c1run1_37_X_isl1.e8.5	7.14332	0.0201065	5
Msx1	c1run1_37_X_isl1.e8.5	1.79186	0.0201065	5
Pitx1	c1run1_37_X_isl1.e8.5	7.15168	0.0201065	5
Nkx1-2	c1run1_37_X_isl1.e8.5	0	0.0201065	5
Snai1	c1run1_37_X_isl1.e8.5	8.55512	0.0201065	5
Tbx3	c1run1_37_X_isl1.e8.5	8.96841	0.0201065	5
Tbx4	c1run1_37_X_isl1.e8.5	7.95944	0.0201065	5
Ets2	c1run1_37_X_isl1.e8.5	3.5449	0.0201065	5
Sall4	c1run1_37_X_isl1.e8.5	9.18328	0.0201065	5
Isl1	c1run1_40_X_isl1.e8.5	8.05599	0.0101454	5
Mef2c	c1run1_40_X_isl1.e8.5	3.1825	0.0101454	5
Nkx2-5	c1run1_40_X_isl1.e8.5	0	0.0101454	5
Ankrd1	c1run1_40_X_isl1.e8.5	0	0.0101454	5
Myocd	c1run1_40_X_isl1.e8.5	0.794464	0.0101454	5
Smyd1	c1run1_40_X_isl1.e8.5	0	0.0101454	5
Gata2	c1run1_40_X_isl1.e8.5	8.29402	0.0101454	5
Hand1	c1run1_40_X_isl1.e8.5	9.19198	0.0101454	5
Hhex	c1run1_40_X_isl1.e8.5	0.794464	0.0101454	5
Hoxa7	c1run1_40_X_isl1.e8.5	4.74142	0.0101454	5
Hoxa9	c1run1_40_X_isl1.e8.5	7.63345	0.0101454	5
Hoxb6	c1run1_40_X_isl1.e8.5	8.37603	0.0101454	5
Hoxc8	c1run1_40_X_isl1.e8.5	5.62856	0.0101454	5
Msx1	c1run1_40_X_isl1.e8.5	8.18538	0.0101454	5
Pitx1	c1run1_40_X_isl1.e8.5	2.43472	0.0101454	5
Nkx1-2	c1run1_40_X_isl1.e8.5	8.59735	0.0101454	5
Snai1	c1run1_40_X_isl1.e8.5	9.4845	0.0101454	5
Tbx3	c1run1_40_X_isl1.e8.5	9.72257	0.0101454	5
Tbx4	c1run1_40_X_isl1.e8.5	9.29846	0.0101454	5
Ets2	c1run1_40_X_isl1.e8.5	4.10077	0.0101454	5
Sall4	c1run1_40_X_isl1.e8.5	11.8148	0.0101454	5
Isl1	c1run1_42_X_isl1.e8.5	10.2799	0.0228958	5
Mef2c	c1run1_42_X_isl1.e8.5	0	0.0228958	5
Nkx2-5	c1run1_42_X_isl1.e8.5	0	0.0228958	5
Ankrd1	c1run1_42_X_isl1.e8.5	0	0.0228958	5
Myocd	c1run1_42_X_isl1.e8.5	0	0.0228958	5
Smyd1	c1run1_42_X_isl1.e8.5	0	0.0228958	5
Gata2	c1run1_42_X_isl1.e8.5	9.14979	0.0228958	5
Hand1	c1run1_42_X_isl1.e8.5	7.18785	0.0228958	5
Hhex	c1run1_42_X_isl1.e8.5	0	0.0228958	5
Hoxa7	c1run1_42_X_isl1.e8.5	7.6514	0.0228958	5
Hoxa9	c1run1_42_X_isl1.e8.5	9.22062	0.0228958	5
Hoxb6	c1run1_42_X_isl1.e8.5	4.15946	0.0228958	5
Hoxc8	c1run1_42_X_isl1.e8.5	5.85054	0.0228958	5
Msx1	c1run1_42_X_isl1.e8.5	7.11168	0.0228958	5
Pitx1	c1run1_42_X_isl1.e8.5	8.1547	0.0228958	5
Nkx1-2	c1run1_42_X_isl1.e8.5	0	0.0228958	5
Snai1	c1run1_42_X_isl1.e8.5	9.25757	0.0228958	5
Tbx3	c1run1_42_X_isl1.e8.5	10.6195	0.0228958	5
Tbx4	c1run1_42_X_isl1.e8.5	6.94611	0.0228958	5
Ets2	c1run1_42_X_isl1.e8.5	6.26518	0.0228958	5
Sall4	c1run1_42_X_isl1.e8.5	11.4877	0.0228958	5
Isl1	c1run1_45_X_isl1.e8.5	3.88821	0.310814	2
Mef2c	c1run1_45_X_isl1.e8.5	10.4093	0.310814	2
Nkx2-5	c1run1_45_X_isl1.e8.5	6.4144	0.310814	2
Ankrd1	c1run1_45_X_isl1.e8.5	3.28099	0.310814	2
Myocd	c1run1_45_X_isl1.e8.5	6.18839	0.310814	2
Smyd1	c1run1_45_X_isl1.e8.5	6.36437	0.310814	2
Gata2	c1run1_45_X_isl1.e8.5	0	0.310814	2
Hand1	c1run1_45_X_isl1.e8.5	0	0.310814	2
Hhex	c1run1_45_X_isl1.e8.5	0	0.310814	2
Hoxa7	c1run1_45_X_isl1.e8.5	0	0.310814	2
Hoxa9	c1run1_45_X_isl1.e8.5	1.29476	0.310814	2
Hoxb6	c1run1_45_X_isl1.e8.5	0	0.310814	2
Hoxc8	c1run1_45_X_isl1.e8.5	0	0.310814	2
Msx1	c1run1_45_X_isl1.e8.5	0	0.310814	2
Pitx1	c1run1_45_X_isl1.e8.5	0	0.310814	2
Nkx1-2	c1run1_45_X_isl1.e8.5	0	0.310814	2
Snai1	c1run1_45_X_isl1.e8.5	5.57009	0.310814	2
Tbx3	c1run1_45_X_isl1.e8.5	0	0.310814	2
Tbx4	c1run1_45_X_isl1.e8.5	0	0.310814	2
Ets2	c1run1_45_X_isl1.e8.5	0	0.310814	2
Sall4	c1run1_45_X_isl1.e8.5	7.17875	0.310814	2
Isl1	c1run1_48_X_isl1.e8.5	0.719406	0.00844779	5
Mef2c	c1run1_48_X_isl1.e8.5	0	0.00844779	5
Nkx2-5	c1run1_48_X_isl1.e8.5	0	0.00844779	5
Ankrd1	c1run1_48_X_isl1.e8.5	0	0.00844779	5
Myocd	c1run1_48_X_isl1.e8.5	0	0.00844779	5
Smyd1	c1run1_48_X_isl1.e8.5	0	0.00844779	5
Gata2	c1run1_48_X_isl1.e8.5	0	0.00844779	5
Hand1	c1run1_48_X_isl1.e8.5	0	0.00844779	5
Hhex	c1run1_48_X_isl1.e8.5	0	0.00844779	5
Hoxa7	c1run1_48_X_isl1.e8.5	7.0674	0.00844779	5
Hoxa9	c1run1_48_X_isl1.e8.5	9.34019	0.00844779	5
Hoxb6	c1run1_48_X_isl1.e8.5	6.8182	0.00844779	5
Hoxc8	c1run1_48_X_isl1.e8.5	7.3339	0.00844779	5
Msx1	c1run1_48_X_isl1.e8.5	4.60135	0.00844779	5
Pitx1	c1run1_48_X_isl1.e8.5	7.09556	0.00844779	5
Nkx1-2	c1run1_48_X_isl1.e8.5	9.53255	0.00844779	5
Snai1	c1run1_48_X_isl1.e8.5	7.44512	0.00844779	5
Tbx3	c1run1_48_X_isl1.e8.5	8.14072	0.00844779	5
Tbx4	c1run1_48_X_isl1.e8.5	8.64813	0.00844779	5
Ets2	c1run1_48_X_isl1.e8.5	7.87673	0.00844779	5
Sall4	c1run1_48_X_isl1.e8.5	12.0377	0.00844779	5
Isl1	c1run1_51_X_isl1.e8.5	7.61078	0.112627	4
Mef2c	c1run1_51_X_isl1.e8.5	2.71869	0.112627	4
Nkx2-5	c1run1_51_X_isl1.e8.5	0	0.112627	4
Ankrd1	c1run1_51_X_isl1.e8.5	0	0.112627	4
Myocd	c1run1_51_X_isl1.e8.5	0	0.112627	4
Smyd1	c1run1_51_X_isl1.e8.5	0	0.112627	4
Gata2	c1run1_51_X_isl1.e8.5	0	0.112627	4
Hand1	c1run1_51_X_isl1.e8.5	0	0.112627	4
Hhex	c1run1_51_X_isl1.e8.5	0	0.112627	4
Hoxa7	c1run1_51_X_isl1.e8.5	0	0.112627	4
Hoxa9	c1run1_51_X_isl1.e8.5	0	0.112627	4
Hoxb6	c1run1_51_X_isl1.e8.5	0	0.112627	4
Hoxc8	c1run1_51_X_isl1.e8.5	0	0.112627	4
Msx1	c1run1_51_X_isl1.e8.5	11.015	0.112627	4
Pitx1	c1run1_51_X_isl1.e8.5	0	0.112627	4
Nkx1-2	c1run1_51_X_isl1.e8.5	0	0.112627	4
Snai1	c1run1_51_X_isl1.e8.5	0	0.112627	4
Tbx3	c1run1_51_X_isl1.e8.5	1.92272	0.112627	4
Tbx4	c1run1_51_X_isl1.e8.5	0	0.112627	4
Ets2	c1run1_51_X_isl1.e8.5	1.51648	0.112627	4
Sall4	c1run1_51_X_isl1.e8.5	3.22869	0.112627	4
Isl1	c1run1_57_X_isl1.e8.5	11.3583	0.0769175	3
Mef2c	c1run1_57_X_isl1.e8.5	1.39479	0.0769175	3
Nkx2-5	c1run1_57_X_isl1.e8.5	0.859772	0.0769175	3
Ankrd1	c1run1_57_X_isl1.e8.5	0	0.0769175	3
Myocd	c1run1_57_X_isl1.e8.5	0	0.0769175	3
Smyd1	c1run1_57_X_isl1.e8.5	0	0.0769175	3
Gata2	c1run1_57_X_isl1.e8.5	0	0.0769175	3
Hand1	c1run1_57_X_isl1.e8.5	0	0.0769175	3
Hhex	c1run1_57_X_isl1.e8.5	10.0556	0.0769175	3
Hoxa7	c1run1_57_X_isl1.e8.5	0	0.0769175	3
Hoxa9	c1run1_57_X_isl1.e8.5	1.39479	0.0769175	3
Hoxb6	c1run1_57_X_isl1.e8.5	0	0.0769175	3
Hoxc8	c1run1_57_X_isl1.e8.5	0.859772	0.0769175	3
Msx1	c1run1_57_X_isl1.e8.5	0	0.0769175	3
Pitx1	c1run1_57_X_isl1.e8.5	0	0.0769175	3
Nkx1-2	c1run1_57_X_isl1.e8.5	0	0.0769175	3
Snai1	c1run1_57_X_isl1.e8.5	0	0.0769175	3
Tbx3	c1run1_57_X_isl1.e8.5	10.4744	0.0769175	3
Tbx4	c1run1_57_X_isl1.e8.5	0	0.0769175	3
Ets2	c1run1_57_X_isl1.e8.5	0	0.0769175	3
Sall4	c1run1_57_X_isl1.e8.5	12.2222	0.0769175	3
Isl1	c1run1_64_X_isl1.e8.5	9.44679	0.0272258	5
Mef2c	c1run1_64_X_isl1.e8.5	0	0.0272258	5
Nkx2-5	c1run1_64_X_isl1.e8.5	0	0.0272258	5
Ankrd1	c1run1_64_X_isl1.e8.5	0	0.0272258	5
Myocd	c1run1_64_X_isl1.e8.5	0	0.0272258	5
Smyd1	c1run1_64_X_isl1.e8.5	0	0.0272258	5
Gata2	c1run1_64_X_isl1.e8.5	6.93648	0.0272258	5
Hand1	c1run1_64_X_isl1.e8.5	8.824	0.0272258	5
Hhex	c1run1_64_X_isl1.e8.5	0	0.0272258	5
Hoxa7	c1run1_64_X_isl1.e8.5	5.72386	0.0272258	5
Hoxa9	c1run1_64_X_isl1.e8.5	2.12916	0.0272258	5
Hoxb6	c1run1_64_X_isl1.e8.5	6.3274	0.0272258	5
Hoxc8	c1run1_64_X_isl1.e8.5	1.42616	0.0272258	5
Msx1	c1run1_64_X_isl1.e8.5	7.43551	0.0272258	5
Pitx1	c1run1_64_X_isl1.e8.5	9.1453	0.0272258	5
Nkx1-2	c1run1_64_X_isl1.e8.5	0	0.0272258	5
Snai1	c1run1_64_X_isl1.e8.5	7.15719	0.0272258	5
Tbx3	c1run1_64_X_isl1.e8.5	10.2357	0.0272258	5
Tbx4	c1run1_64_X_isl1.e8.5	9.4398	0.0272258	5
Ets2	c1run1_64_X_isl1.e8.5	0	0.0272258	5
Sall4	c1run1_64_X_isl1.e8.5	12.2864	0.0272258	5
Isl1	c1run1_66_X_isl1.e8.5	10.398	0.0206141	5
Mef2c	c1run1_66_X_isl1.e8.5	3.72873	0.0206141	5
Nkx2-5	c1run1_66_X_isl1.e8.5	0	0.0206141	5
Ankrd1	c1run1_66_X_isl1.e8.5	0	0.0206141	5
Myocd	c1run1_66_X_isl1.e8.5	0	0.0206141	5
Smyd1	c1run1_66_X_isl1.e8.5	0	0.0206141	5
Gata2	c1run1_66_X_isl1.e8.5	3.13753	0.0206141	5
Hand1	c1run1_66_X_isl1.e8.5	8.93389	0.0206141	5
Hhex	c1run1_66_X_isl1.e8.5	5.57897	0.0206141	5
Hoxa7	c1run1_66_X_isl1.e8.5	4.73493	0.0206141	5
Hoxa9	c1run1_66_X_isl1.e8.5	8.10392	0.0206141	5
Hoxb6	c1run1_66_X_isl1.e8.5	4.79407	0.0206141	5
Hoxc8	c1run1_66_X_isl1.e8.5	1.69092	0.0206141	5
Msx1	c1run1_66_X_isl1.e8.5	8.72941	0.0206141	5
Pitx1	c1run1_66_X_isl1.e8.5	2.94221	0.0206141	5
Nkx1-2	c1run1_66_X_isl1.e8.5	1.08019	0.0206141	5
Snai1	c1run1_66_X_isl1.e8.5	8.85623	0.0206141	5
Tbx3	c1run1_66_X_isl1.e8.5	10.1825	0.0206141	5
Tbx4	c1run1_66_X_isl1.e8.5	8.49999	0.0206141	5
Ets2	c1run1_66_X_isl1.e8.5	0	0.0206141	5
Sall4	c1run1_66_X_isl1.e8.5	11.9152	0.0206141	5
Isl1	c1run1_91_X_isl1.e8.5	7.83146	0.417561	2
Mef2c	c1run1_91_X_isl1.e8.5	10.4791	0.417561	2
Nkx2-5	c1run1_91_X_isl1.e8.5	7.09031	0.417561	2
Ankrd1	c1run1_91_X_isl1.e8.5	0	0.417561	2
Myocd	c1run1_91_X_isl1.e8.5	8.17382	0.417561	2
Smyd1	c1run1_91_X_isl1.e8.5	4.91531	0.417561	2
Gata2	c1run1_91_X_isl1.e8.5	0	0.417561	2
Hand1	c1run1_91_X_isl1.e8.5	0	0.417561	2
Hhex	c1run1_91_X_isl1.e8.5	0	0.417561	2
Hoxa7	c1run1_91_X_isl1.e8.5	0	0.417561	2
Hoxa9	c1run1_91_X_isl1.e8.5	0	0.417561	2
Hoxb6	c1run1_91_X_isl1.e8.5	0	0.417561	2
Hoxc8	c1run1_91_X_isl1.e8.5	0	0.417561	2
Msx1	c1run1_91_X_isl1.e8.5	0	0.417561	2
Pitx1	c1run1_91_X_isl1.e8.5	0	0.417561	2
Nkx1-2	c1run1_91_X_isl1.e8.5	0	0.417561	2
Snai1	c1run1_91_X_isl1.e8.5	0	0.417561	2
Tbx3	c1run1_91_X_isl1.e8.5	5.60709	0.417561	2
Tbx4	c1run1_91_X_isl1.e8.5	0	0.417561	2
Ets2	c1run1_91_X_isl1.e8.5	0	0.417561	2
Sall4	c1run1_91_X_isl1.e8.5	10.4642	0.417561	2
Isl1	c1run2_01_X_isl1.e8.5	7.50293	0.0141366	5
Mef2c	c1run2_01_X_isl1.e8.5	0.811271	0.0141366	5
Nkx2-5	c1run2_01_X_isl1.e8.5	0	0.0141366	5
Ankrd1	c1run2_01_X_isl1.e8.5	0	0.0141366	5
Myocd	c1run2_01_X_isl1.e8.5	0	0.0141366	5
Smyd1	c1run2_01_X_isl1.e8.5	1.32741	0.0141366	5
Gata2	c1run2_01_X_isl1.e8.5	3.21759	0.0141366	5
Hand1	c1run2_01_X_isl1.e8.5	10.655	0.0141366	5
Hhex	c1run2_01_X_isl1.e8.5	0.811271	0.0141366	5
Hoxa7	c1run2_01_X_isl1.e8.5	8.29652	0.0141366	5
Hoxa9	c1run2_01_X_isl1.e8.5	4.31244	0.0141366	5
Hoxb6	c1run2_01_X_isl1.e8.5	6.50487	0.0141366	5
Hoxc8	c1run2_01_X_isl1.e8.5	4.7367	0.0141366	5
Msx1	c1run2_01_X_isl1.e8.5	7.89935	0.0141366	5
Pitx1	c1run2_01_X_isl1.e8.5	3.09551	0.0141366	5
Nkx1-2	c1run2_01_X_isl1.e8.5	3.43454	0.0141366	5
Snai1	c1run2_01_X_isl1.e8.5	6.75723	0.0141366	5
Tbx3	c1run2_01_X_isl1.e8.5	8.70084	0.0141366	5
Tbx4	c1run2_01_X_isl1.e8.5	6.89169	0.0141366	5
Ets2	c1run2_01_X_isl1.e8.5	3.70886	0.0141366	5
Sall4	c1run2_01_X_isl1.e8.5	10.8634	0.0141366	5
Isl1	c1run2_02_X_isl1.e8.5	0	0.0529415	5
Mef2c	c1run2_02_X_isl1.e8.5	0	0.0529415	5
Nkx2-5	c1run2_02_X_isl1.e8.5	0	0.0529415	5
Ankrd1	c1run2_02_X_isl1.e8.5	0	0.0529415	5
Myocd	c1run2_02_X_isl1.e8.5	0	0.0529415	5
Smyd1	c1run2_02_X_isl1.e8.5	0	0.0529415	5
Gata2	c1run2_02_X_isl1.e8.5	5.51314	0.0529415	5
Hand1	c1run2_02_X_isl1.e8.5	0	0.0529415	5
Hhex	c1run2_02_X_isl1.e8.5	8.11616	0.0529415	5
Hoxa7	c1run2_02_X_isl1.e8.5	6.48953	0.0529415	5
Hoxa9	c1run2_02_X_isl1.e8.5	8.01206	0.0529415	5
Hoxb6	c1run2_02_X_isl1.e8.5	6.15019	0.0529415	5
Hoxc8	c1run2_02_X_isl1.e8.5	7.95705	0.0529415	5
Msx1	c1run2_02_X_isl1.e8.5	6.45818	0.0529415	5
Pitx1	c1run2_02_X_isl1.e8.5	0	0.0529415	5
Nkx1-2	c1run2_02_X_isl1.e8.5	7.92157	0.0529415	5
Snai1	c1run2_02_X_isl1.e8.5	0	0.0529415	5
Tbx3	c1run2_02_X_isl1.e8.5	3.83592	0.0529415	5
Tbx4	c1run2_02_X_isl1.e8.5	1.14226	0.0529415	5
Ets2	c1run2_02_X_isl1.e8.5	4.16203	0.0529415	5
Sall4	c1run2_02_X_isl1.e8.5	10.1724	0.0529415	5
Isl1	c1run2_05_X_isl1.e8.5	7.84813	0.0110806	5
Mef2c	c1run2_05_X_isl1.e8.5	0	0.0110806	5
Nkx2-5	c1run2_05_X_isl1.e8.5	0	0.0110806	5
Ankrd1	c1run2_05_X_isl1.e8.5	0	0.0110806	5
Myocd	c1run2_05_X_isl1.e8.5	0	0.0110806	5
Smyd1	c1run2_05_X_isl1.e8.5	0	0.0110806	5
Gata2	c1run2_05_X_isl1.e8.5	0	0.0110806	5
Hand1	c1run2_05_X_isl1.e8.5	9.16322	0.0110806	5
Hhex	c1run2_05_X_isl1.e8.5	0	0.0110806	5
Hoxa7	c1run2_05_X_isl1.e8.5	7.39816	0.0110806	5
Hoxa9	c1run2_05_X_isl1.e8.5	9.57351	0.0110806	5
Hoxb6	c1run2_05_X_isl1.e8.5	6.39708	0.0110806	5
Hoxc8	c1run2_05_X_isl1.e8.5	7.88846	0.0110806	5
Msx1	c1run2_05_X_isl1.e8.5	8.845	0.0110806	5
Pitx1	c1run2_05_X_isl1.e8.5	6.68728	0.0110806	5
Nkx1-2	c1run2_05_X_isl1.e8.5	7.56058	0.0110806	5
Snai1	c1run2_05_X_isl1.e8.5	6.13746	0.0110806	5
Tbx3	c1run2_05_X_isl1.e8.5	10.4554	0.0110806	5
Tbx4	c1run2_05_X_isl1.e8.5	9.16322	0.0110806	5
Ets2	c1run2_05_X_isl1.e8.5	9.12153	0.0110806	5
Sall4	c1run2_05_X_isl1.e8.5	12.3215	0.0110806	5
Isl1	c1run2_06_X_isl1.e8.5	8.55795	0.352935	2
Mef2c	c1run2_06_X_isl1.e8.5	11.8517	0.352935	2
Nkx2-5	c1run2_06_X_isl1.e8.5	4.78765	0.352935	2
Ankrd1	c1run2_06_X_isl1.e8.5	11.492	0.352935	2
Myocd	c1run2_06_X_isl1.e8.5	12.4	0.352935	2
Smyd1	c1run2_06_X_isl1.e8.5	8.00311	0.352935	2
Gata2	c1run2_06_X_isl1.e8.5	0	0.352935	2
Hand1	c1run2_06_X_isl1.e8.5	0	0.352935	2
Hhex	c1run2_06_X_isl1.e8.5	0	0.352935	2
Hoxa7	c1run2_06_X_isl1.e8.5	1.04601	0.352935	2
Hoxa9	c1run2_06_X_isl1.e8.5	0	0.352935	2
Hoxb6	c1run2_06_X_isl1.e8.5	0	0.352935	2
Hoxc8	c1run2_06_X_isl1.e8.5	0	0.352935	2
Msx1	c1run2_06_X_isl1.e8.5	0	0.352935	2
Pitx1	c1run2_06_X_isl1.e8.5	0	0.352935	2
Nkx1-2	c1run2_06_X_isl1.e8.5	0	0.352935	2
Snai1	c1run2_06_X_isl1.e8.5	0	0.352935	2
Tbx3	c1run2_06_X_isl1.e8.5	7.02061	0.352935	2
Tbx4	c1run2_06_X_isl1.e8.5	0	0.352935	2
Ets2	c1run2_06_X_isl1.e8.5	1.04601	0.352935	2
Sall4	c1run2_06_X_isl1.e8.5	11.5934	0.352935	2
Isl1	c1run2_07_X_isl1.e8.5	5.9981	0.0539826	5
Mef2c	c1run2_07_X_isl1.e8.5	0	0.0539826	5
Nkx2-5	c1run2_07_X_isl1.e8.5	0	0.0539826	5
Ankrd1	c1run2_07_X_isl1.e8.5	0	0.0539826	5
Myocd	c1run2_07_X_isl1.e8.5	0	0.0539826	5
Smyd1	c1run2_07_X_isl1.e8.5	0	0.0539826	5
Gata2	c1run2_07_X_isl1.e8.5	0	0.0539826	5
Hand1	c1run2_07_X_isl1.e8.5	9.3468	0.0539826	5
Hhex	c1run2_07_X_isl1.e8.5	0	0.0539826	5
Hoxa7	c1run2_07_X_isl1.e8.5	0	0.0539826	5
Hoxa9	c1run2_07_X_isl1.e8.5	0	0.0539826	5
Hoxb6	c1run2_07_X_isl1.e8.5	5.37966	0.0539826	5
Hoxc8	c1run2_07_X_isl1.e8.5	0	0.0539826	5
Msx1	c1run2_07_X_isl1.e8.5	7.4212	0.0539826	5
Pitx1	c1run2_07_X_isl1.e8.5	2.91719	0.0539826	5
Nkx1-2	c1run2_07_X_isl1.e8.5	0	0.0539826	5
Snai1	c1run2_07_X_isl1.e8.5	0	0.0539826	5
Tbx3	c1run2_07_X_isl1.e8.5	5.9981	0.0539826	5
Tbx4	c1run2_07_X_isl1.e8.5	0	0.0539826	5
Ets2	c1run2_07_X_isl1.e8.5	0	0.0539826	5
Sall4	c1run2_07_X_isl1.e8.5	11.0776	0.0539826	5
Isl1	c1run2_11_X_isl1.e8.5	8.1597	0.0876311	4
Mef2c	c1run2_11_X_isl1.e8.5	6.50279	0.0876311	4
Nkx2-5	c1run2_11_X_isl1.e8.5	0	0.0876311	4
Ankrd1	c1run2_11_X_isl1.e8.5	0	0.0876311	4
Myocd	c1run2_11_X_isl1.e8.5	1.29073	0.0876311	4
Smyd1	c1run2_11_X_isl1.e8.5	0	0.0876311	4
Gata2	c1run2_11_X_isl1.e8.5	0	0.0876311	4
Hand1	c1run2_11_X_isl1.e8.5	0	0.0876311	4
Hhex	c1run2_11_X_isl1.e8.5	0	0.0876311	4
Hoxa7	c1run2_11_X_isl1.e8.5	0	0.0876311	4
Hoxa9	c1run2_11_X_isl1.e8.5	0	0.0876311	4
Hoxb6	c1run2_11_X_isl1.e8.5	0	0.0876311	4
Hoxc8	c1run2_11_X_isl1.e8.5	1.29073	0.0876311	4
Msx1	c1run2_11_X_isl1.e8.5	0	0.0876311	4
Pitx1	c1run2_11_X_isl1.e8.5	0	0.0876311	4
Nkx1-2	c1run2_11_X_isl1.e8.5	0	0.0876311	4
Snai1	c1run2_11_X_isl1.e8.5	0	0.0876311	4
Tbx3	c1run2_11_X_isl1.e8.5	0	0.0876311	4
Tbx4	c1run2_11_X_isl1.e8.5	0	0.0876311	4
Ets2	c1run2_11_X_isl1.e8.5	0	0.0876311	4
Sall4	c1run2_11_X_isl1.e8.5	10.8953	0.0876311	4
Isl1	c1run2_13_X_isl1.e8.5	9.23095	0.0829344	4
Mef2c	c1run2_13_X_isl1.e8.5	0.857387	0.0829344	4
Nkx2-5	c1run2_13_X_isl1.e8.5	0	0.0829344	4
Ankrd1	c1run2_13_X_isl1.e8.5	0.857387	0.0829344	4
Myocd	c1run2_13_X_isl1.e8.5	0	0.0829344	4
Smyd1	c1run2_13_X_isl1.e8.5	0	0.0829344	4
Gata2	c1run2_13_X_isl1.e8.5	0	0.0829344	4
Hand1	c1run2_13_X_isl1.e8.5	1.3915	0.0829344	4
Hhex	c1run2_13_X_isl1.e8.5	0	0.0829344	4
Hoxa7	c1run2_13_X_isl1.e8.5	0.857387	0.0829344	4
Hoxa9	c1run2_13_X_isl1.e8.5	0	0.0829344	4
Hoxb6	c1run2_13_X_isl1.e8.5	0	0.0829344	4
Hoxc8	c1run2_13_X_isl1.e8.5	0.857387	0.0829344	4
Msx1	c1run2_13_X_isl1.e8.5	0.857387	0.0829344	4
Pitx1	c1run2_13_X_isl1.e8.5	0	0.0829344	4
Nkx1-2	c1run2_13_X_isl1.e8.5	0	0.0829344	4
Snai1	c1run2_13_X_isl1.e8.5	9.9561	0.0829344	4
Tbx3	c1run2_13_X_isl1.e8.5	10.6293	0.0829344	4
Tbx4	c1run2_13_X_isl1.e8.5	0	0.0829344	4
Ets2	c1run2_13_X_isl1.e8.5	0	0.0829344	4
Sall4	c1run2_13_X_isl1.e8.5	7.35183	0.0829344	4
Isl1	c1run2_14_X_isl1.e8.5	3.72218	0.0218067	5
Mef2c	c1run2_14_X_isl1.e8.5	0	0.0218067	5
Nkx2-5	c1run2_14_X_isl1.e8.5	0	0.0218067	5
Ankrd1	c1run2_14_X_isl1.e8.5	0	0.0218067	5
Myocd	c1run2_14_X_isl1.e8.5	0	0.0218067	5
Smyd1	c1run2_14_X_isl1.e8.5	0	0.0218067	5
Gata2	c1run2_14_X_isl1.e8.5	0	0.0218067	5
Hand1	c1run2_14_X_isl1.e8.5	9.03974	0.0218067	5
Hhex	c1run2_14_X_isl1.e8.5	0	0.0218067	5
Hoxa7	c1run2_14_X_isl1.e8.5	3.06053	0.0218067	5
Hoxa9	c1run2_14_X_isl1.e8.5	7.6337	0.0218067	5
Hoxb6	c1run2_14_X_isl1.e8.5	7.79029	0.0218067	5
Hoxc8	c1run2_14_X_isl1.e8.5	7.57953	0.0218067	5
Msx1	c1run2_14_X_isl1.e8.5	8.09061	0.0218067	5
Pitx1	c1run2_14_X_isl1.e8.5	0.858504	0.0218067	5
Nkx1-2	c1run2_14_X_isl1.e8.5	10.1643	0.0218067	5
Snai1	c1run2_14_X_isl1.e8.5	8.27612	0.0218067	5
Tbx3	c1run2_14_X_isl1.e8.5	0	0.0218067	5
Tbx4	c1run2_14_X_isl1.e8.5	3.42732	0.0218067	5
Ets2	c1run2_14_X_isl1.e8.5	4.46872	0.0218067	5
Sall4	c1run2_14_X_isl1.e8.5	10.891	0.0218067	5
Isl1	c1run2_20_X_isl1.e8.5	8.60713	0.141338	2
Mef2c	c1run2_20_X_isl1.e8.5	10.1595	0.141338	2
Nkx2-5	c1run2_20_X_isl1.e8.5	3.94012	0.141338	2
Ankrd1	c1run2_20_X_isl1.e8.5	0	0.141338	2
Myocd	c1run2_20_X_isl1.e8.5	7.77154	0.141338	2
Smyd1	c1run2_20_X_isl1.e8.5	0	0.141338	2
Gata2	c1run2_20_X_isl1.e8.5	0	0.141338	2
Hand1	c1run2_20_X_isl1.e8.5	0	0.141338	2
Hhex	c1run2_20_X_isl1.e8.5	0	0.141338	2
Hoxa7	c1run2_20_X_isl1.e8.5	0	0.141338	2
Hoxa9	c1run2_20_X_isl1.e8.5	0	0.141338	2
Hoxb6	c1run2_20_X_isl1.e8.5	0	0.141338	2
Hoxc8	c1run2_20_X_isl1.e8.5	0	0.141338	2
Msx1	c1run2_20_X_isl1.e8.5	0	0.141338	2
Pitx1	c1run2_20_X_isl1.e8.5	0	0.141338	2
Nkx1-2	c1run2_20_X_isl1.e8.5	0	0.141338	2
Snai1	c1run2_20_X_isl1.e8.5	2.25586	0.141338	2
Tbx3	c1run2_20_X_isl1.e8.5	5.3044	0.141338	2
Tbx4	c1run2_20_X_isl1.e8.5	0	0.141338	2
Ets2	c1run2_20_X_isl1.e8.5	0	0.141338	2
Sall4	c1run2_20_X_isl1.e8.5	10.628	0.141338	2
Isl1	c1run2_21_X_isl1.e8.5	7.48355	0.0192035	5
Mef2c	c1run2_21_X_isl1.e8.5	0	0.0192035	5
Nkx2-5	c1run2_21_X_isl1.e8.5	0	0.0192035	5
Ankrd1	c1run2_21_X_isl1.e8.5	2.86907	0.0192035	5
Myocd	c1run2_21_X_isl1.e8.5	0	0.0192035	5
Smyd1	c1run2_21_X_isl1.e8.5	0	0.0192035	5
Gata2	c1run2_21_X_isl1.e8.5	4.0972	0.0192035	5
Hand1	c1run2_21_X_isl1.e8.5	9.67219	0.0192035	5
Hhex	c1run2_21_X_isl1.e8.5	0	0.0192035	5
Hoxa7	c1run2_21_X_isl1.e8.5	6.09303	0.0192035	5
Hoxa9	c1run2_21_X_isl1.e8.5	7.02925	0.0192035	5
Hoxb6	c1run2_21_X_isl1.e8.5	3.00118	0.0192035	5
Hoxc8	c1run2_21_X_isl1.e8.5	5.05442	0.0192035	5
Msx1	c1run2_21_X_isl1.e8.5	9.68452	0.0192035	5
Pitx1	c1run2_21_X_isl1.e8.5	6.76688	0.0192035	5
Nkx1-2	c1run2_21_X_isl1.e8.5	0	0.0192035	5
Snai1	c1run2_21_X_isl1.e8.5	7.76024	0.0192035	5
Tbx3	c1run2_21_X_isl1.e8.5	9.21713	0.0192035	5
Tbx4	c1run2_21_X_isl1.e8.5	9.89556	0.0192035	5
Ets2	c1run2_21_X_isl1.e8.5	3.23387	0.0192035	5
Sall4	c1run2_21_X_isl1.e8.5	11.7622	0.0192035	5
Isl1	c1run2_27_X_isl1.e8.5	5.0005	0.260345	2
Mef2c	c1run2_27_X_isl1.e8.5	7.63377	0.260345	2
Nkx2-5	c1run2_27_X_isl1.e8.5	6.67195	0.260345	2
Ankrd1	c1run2_27_X_isl1.e8.5	10.9053	0.260345	2
Myocd	c1run2_27_X_isl1.e8.5	4.7529	0.260345	2
Smyd1	c1run2_27_X_isl1.e8.5	5.7259	0.260345	2
Gata2	c1run2_27_X_isl1.e8.5	0	0.260345	2
Hand1	c1run2_27_X_isl1.e8.5	0	0.260345	2
Hhex	c1run2_27_X_isl1.e8.5	0	0.260345	2
Hoxa7	c1run2_27_X_isl1.e8.5	0	0.260345	2
Hoxa9	c1run2_27_X_isl1.e8.5	0	0.260345	2
Hoxb6	c1run2_27_X_isl1.e8.5	0	0.260345	2
Hoxc8	c1run2_27_X_isl1.e8.5	0	0.260345	2
Msx1	c1run2_27_X_isl1.e8.5	0	0.260345	2
Pitx1	c1run2_27_X_isl1.e8.5	0	0.260345	2
Nkx1-2	c1run2_27_X_isl1.e8.5	0	0.260345	2
Snai1	c1run2_27_X_isl1.e8.5	0	0.260345	2
Tbx3	c1run2_27_X_isl1.e8.5	0	0.260345	2
Tbx4	c1run2_27_X_isl1.e8.5	0	0.260345	2
Ets2	c1run2_27_X_isl1.e8.5	5.29363	0.260345	2
Sall4	c1run2_27_X_isl1.e8.5	9.02308	0.260345	2
Isl1	c1run2_33_X_isl1.e8.5	4.86867	0.0381505	5
Mef2c	c1run2_33_X_isl1.e8.5	0	0.0381505	5
Nkx2-5	c1run2_33_X_isl1.e8.5	0	0.0381505	5
Ankrd1	c1run2_33_X_isl1.e8.5	0	0.0381505	5
Myocd	c1run2_33_X_isl1.e8.5	0	0.0381505	5
Smyd1	c1run2_33_X_isl1.e8.5	0	0.0381505	5
Gata2	c1run2_33_X_isl1.e8.5	0	0.0381505	5
Hand1	c1run2_33_X_isl1.e8.5	9.184	0.0381505	5
Hhex	c1run2_33_X_isl1.e8.5	1.31327	0.0381505	5
Hoxa7	c1run2_33_X_isl1.e8.5	1.32186	0.0381505	5
Hoxa9	c1run2_33_X_isl1.e8.5	7.33435	0.0381505	5
Hoxb6	c1run2_33_X_isl1.e8.5	4.86867	0.0381505	5
Hoxc8	c1run2_33_X_isl1.e8.5	6.84984	0.0381505	5
Msx1	c1run2_33_X_isl1.e8.5	7.37364	0.0381505	5
Pitx1	c1run2_33_X_isl1.e8.5	4.62997	0.0381505	5
Nkx1-2	c1run2_33_X_isl1.e8.5	7.74715	0.0381505	5
Snai1	c1run2_33_X_isl1.e8.5	4.44562	0.0381505	5
Tbx3	c1run2_33_X_isl1.e8.5	8.28249	0.0381505	5
Tbx4	c1run2_33_X_isl1.e8.5	4.23423	0.0381505	5
Ets2	c1run2_33_X_isl1.e8.5	0	0.0381505	5
Sall4	c1run2_33_X_isl1.e8.5	10.6786	0.0381505	5
Isl1	c1run2_37_X_isl1.e8.5	9.14595	0.0239169	5
Mef2c	c1run2_37_X_isl1.e8.5	0	0.0239169	5
Nkx2-5	c1run2_37_X_isl1.e8.5	0	0.0239169	5
Ankrd1	c1run2_37_X_isl1.e8.5	0	0.0239169	5
Myocd	c1run2_37_X_isl1.e8.5	4.5263	0.0239169	5
Smyd1	c1run2_37_X_isl1.e8.5	0	0.0239169	5
Gata2	c1run2_37_X_isl1.e8.5	0	0.0239169	5
Hand1	c1run2_37_X_isl1.e8.5	9.80786	0.0239169	5
Hhex	c1run2_37_X_isl1.e8.5	0	0.0239169	5
Hoxa7	c1run2_37_X_isl1.e8.5	7.53658	0.0239169	5
Hoxa9	c1run2_37_X_isl1.e8.5	9.04304	0.0239169	5
Hoxb6	c1run2_37_X_isl1.e8.5	7.6936	0.0239169	5
Hoxc8	c1run2_37_X_isl1.e8.5	8.22612	0.0239169	5
Msx1	c1run2_37_X_isl1.e8.5	2.38934	0.0239169	5
Pitx1	c1run2_37_X_isl1.e8.5	5.54792	0.0239169	5
Nkx1-2	c1run2_37_X_isl1.e8.5	0	0.0239169	5
Snai1	c1run2_37_X_isl1.e8.5	2.60574	0.0239169	5
Tbx3	c1run2_37_X_isl1.e8.5	7.55093	0.0239169	5
Tbx4	c1run2_37_X_isl1.e8.5	9.38424	0.0239169	5
Ets2	c1run2_37_X_isl1.e8.5	5.81017	0.0239169	5
Sall4	c1run2_37_X_isl1.e8.5	12.3876	0.0239169	5
Isl1	c1run2_38_X_isl1.e8.5	8.24636	0	5
Mef2c	c1run2_38_X_isl1.e8.5	0	0	5
Nkx2-5	c1run2_38_X_isl1.e8.5	0	0	5
Ankrd1	c1run2_38_X_isl1.e8.5	0	0	5
Myocd	c1run2_38_X_isl1.e8.5	0	0	5
Smyd1	c1run2_38_X_isl1.e8.5	0	0	5
Gata2	c1run2_38_X_isl1.e8.5	0	0	5
Hand1	c1run2_38_X_isl1.e8.5	5.52057	0	5
Hhex	c1run2_38_X_isl1.e8.5	0	0	5
Hoxa7	c1run2_38_X_isl1.e8.5	8.20621	0	5
Hoxa9	c1run2_38_X_isl1.e8.5	8.62654	0	5
Hoxb6	c1run2_38_X_isl1.e8.5	6.18322	0	5
Hoxc8	c1run2_38_X_isl1.e8.5	6.71958	0	5
Msx1	c1run2_38_X_isl1.e8.5	9.66154	0	5
Pitx1	c1run2_38_X_isl1.e8.5	7.04674	0	5
Nkx1-2	c1run2_38_X_isl1.e8.5	2.64353	0	5
Snai1	c1run2_38_X_isl1.e8.5	9.6719	0	5
Tbx3	c1run2_38_X_isl1.e8.5	9.49541	0	5
Tbx4	c1run2_38_X_isl1.e8.5	9.27962	0	5
Ets2	c1run2_38_X_isl1.e8.5	7.47777	0	5
Sall4	c1run2_38_X_isl1.e8.5	11.5277	0	5
Isl1	c1run2_40_X_isl1.e8.5	3.89453	0.0448649	5
Mef2c	c1run2_40_X_isl1.e8.5	5.90583	0.0448649	5
Nkx2-5	c1run2_40_X_isl1.e8.5	0	0.0448649	5
Ankrd1	c1run2_40_X_isl1.e8.5	0	0.0448649	5
Myocd	c1run2_40_X_isl1.e8.5	6.58183	0.0448649	5
Smyd1	c1run2_40_X_isl1.e8.5	0	0.0448649	5
Gata2	c1run2_40_X_isl1.e8.5	6.90771	0.0448649	5
Hand1	c1run2_40_X_isl1.e8.5	10.5162	0.0448649	5
Hhex	c1run2_40_X_isl1.e8.5	0	0.0448649	5
Hoxa7	c1run2_40_X_isl1.e8.5	7.27378	0.0448649	5
Hoxa9	c1run2_40_X_isl1.e8.5	8.80483	0.0448649	5
Hoxb6	c1run2_40_X_isl1.e8.5	4.59216	0.0448649	5
Hoxc8	c1run2_40_X_isl1.e8.5	5.72846	0.0448649	5
Msx1	c1run2_40_X_isl1.e8.5	7.18488	0.0448649	5
Pitx1	c1run2_40_X_isl1.e8.5	3.89453	0.0448649	5
Nkx1-2	c1run2_40_X_isl1.e8.5	0	0.0448649	5
Snai1	c1run2_40_X_isl1.e8.5	10.3344	0.0448649	5
Tbx3	c1run2_40_X_isl1.e8.5	9.48029	0.0448649	5
Tbx4	c1run2_40_X_isl1.e8.5	10.1689	0.0448649	5
Ets2	c1run2_40_X_isl1.e8.5	7.69187	0.0448649	5
Sall4	c1run2_40_X_isl1.e8.5	10.5709	0.0448649	5
Isl1	c1run2_43_X_isl1.e8.5	7.82832	0.086233	4
Mef2c	c1run2_43_X_isl1.e8.5	0	0.086233	4
Nkx2-5	c1run2_43_X_isl1.e8.5	0	0.086233	4
Ankrd1	c1run2_43_X_isl1.e8.5	0	0.086233	4
Myocd	c1run2_43_X_isl1.e8.5	0	0.086233	4
Smyd1	c1run2_43_X_isl1.e8.5	0	0.086233	4
Gata2	c1run2_43_X_isl1.e8.5	4.20211	0.086233	4
Hand1	c1run2_43_X_isl1.e8.5	0	0.086233	4
Hhex	c1run2_43_X_isl1.e8.5	0	0.086233	4
Hoxa7	c1run2_43_X_isl1.e8.5	0	0.086233	4
Hoxa9	c1run2_43_X_isl1.e8.5	0	0.086233	4
Hoxb6	c1run2_43_X_isl1.e8.5	0	0.086233	4
Hoxc8	c1run2_43_X_isl1.e8.5	0	0.086233	4
Msx1	c1run2_43_X_isl1.e8.5	0.938178	0.086233	4
Pitx1	c1run2_43_X_isl1.e8.5	0	0.086233	4
Nkx1-2	c1run2_43_X_isl1.e8.5	0	0.086233	4
Snai1	c1run2_43_X_isl1.e8.5	6.00476	0.086233	4
Tbx3	c1run2_43_X_isl1.e8.5	0	0.086233	4
Tbx4	c1run2_43_X_isl1.e8.5	0	0.086233	4
Ets2	c1run2_43_X_isl1.e8.5	5.6833	0.086233	4
Sall4	c1run2_43_X_isl1.e8.5	9.96117	0.086233	4
Isl1	c1run2_44_X_isl1.e8.5	8.76307	0.0786181	4
Mef2c	c1run2_44_X_isl1.e8.5	1.60278	0.0786181	4
Nkx2-5	c1run2_44_X_isl1.e8.5	0	0.0786181	4
Ankrd1	c1run2_44_X_isl1.e8.5	0	0.0786181	4
Myocd	c1run2_44_X_isl1.e8.5	0	0.0786181	4
Smyd1	c1run2_44_X_isl1.e8.5	0	0.0786181	4
Gata2	c1run2_44_X_isl1.e8.5	1.89389	0.0786181	4
Hand1	c1run2_44_X_isl1.e8.5	2.34328	0.0786181	4
Hhex	c1run2_44_X_isl1.e8.5	2.96179	0.0786181	4
Hoxa7	c1run2_44_X_isl1.e8.5	2.52447	0.0786181	4
Hoxa9	c1run2_44_X_isl1.e8.5	0	0.0786181	4
Hoxb6	c1run2_44_X_isl1.e8.5	0	0.0786181	4
Hoxc8	c1run2_44_X_isl1.e8.5	0	0.0786181	4
Msx1	c1run2_44_X_isl1.e8.5	0	0.0786181	4
Pitx1	c1run2_44_X_isl1.e8.5	2.68543	0.0786181	4
Nkx1-2	c1run2_44_X_isl1.e8.5	0	0.0786181	4
Snai1	c1run2_44_X_isl1.e8.5	5.97263	0.0786181	4
Tbx3	c1run2_44_X_isl1.e8.5	2.34328	0.0786181	4
Tbx4	c1run2_44_X_isl1.e8.5	1.23767	0.0786181	4
Ets2	c1run2_44_X_isl1.e8.5	2.83022	0.0786181	4
Sall4	c1run2_44_X_isl1.e8.5	11.1926	0.0786181	4
Isl1	c1run2_49_X_isl1.e8.5	7.81432	0.0825872	4
Mef2c	c1run2_49_X_isl1.e8.5	9.11428	0.0825872	4
Nkx2-5	c1run2_49_X_isl1.e8.5	0	0.0825872	4
Ankrd1	c1run2_49_X_isl1.e8.5	0	0.0825872	4
Myocd	c1run2_49_X_isl1.e8.5	0	0.0825872	4
Smyd1	c1run2_49_X_isl1.e8.5	0	0.0825872	4
Gata2	c1run2_49_X_isl1.e8.5	0	0.0825872	4
Hand1	c1run2_49_X_isl1.e8.5	0	0.0825872	4
Hhex	c1run2_49_X_isl1.e8.5	0	0.0825872	4
Hoxa7	c1run2_49_X_isl1.e8.5	1.00027	0.0825872	4
Hoxa9	c1run2_49_X_isl1.e8.5	0	0.0825872	4
Hoxb6	c1run2_49_X_isl1.e8.5	0	0.0825872	4
Hoxc8	c1run2_49_X_isl1.e8.5	0	0.0825872	4
Msx1	c1run2_49_X_isl1.e8.5	0	0.0825872	4
Pitx1	c1run2_49_X_isl1.e8.5	0	0.0825872	4
Nkx1-2	c1run2_49_X_isl1.e8.5	0	0.0825872	4
Snai1	c1run2_49_X_isl1.e8.5	6.34039	0.0825872	4
Tbx3	c1run2_49_X_isl1.e8.5	5.85851	0.0825872	4
Tbx4	c1run2_49_X_isl1.e8.5	0	0.0825872	4
Ets2	c1run2_49_X_isl1.e8.5	5.17045	0.0825872	4
Sall4	c1run2_49_X_isl1.e8.5	9.21971	0.0825872	4
Isl1	c1run2_56_X_isl1.e8.5	8.82873	0.0869235	4
Mef2c	c1run2_56_X_isl1.e8.5	5.3946	0.0869235	4
Nkx2-5	c1run2_56_X_isl1.e8.5	0	0.0869235	4
Ankrd1	c1run2_56_X_isl1.e8.5	0	0.0869235	4
Myocd	c1run2_56_X_isl1.e8.5	0	0.0869235	4
Smyd1	c1run2_56_X_isl1.e8.5	0	0.0869235	4
Gata2	c1run2_56_X_isl1.e8.5	0	0.0869235	4
Hand1	c1run2_56_X_isl1.e8.5	0	0.0869235	4
Hhex	c1run2_56_X_isl1.e8.5	0	0.0869235	4
Hoxa7	c1run2_56_X_isl1.e8.5	0	0.0869235	4
Hoxa9	c1run2_56_X_isl1.e8.5	0	0.0869235	4
Hoxb6	c1run2_56_X_isl1.e8.5	0	0.0869235	4
Hoxc8	c1run2_56_X_isl1.e8.5	0	0.0869235	4
Msx1	c1run2_56_X_isl1.e8.5	0	0.0869235	4
Pitx1	c1run2_56_X_isl1.e8.5	0	0.0869235	4
Nkx1-2	c1run2_56_X_isl1.e8.5	0	0.0869235	4
Snai1	c1run2_56_X_isl1.e8.5	6.32552	0.0869235	4
Tbx3	c1run2_56_X_isl1.e8.5	0	0.0869235	4
Tbx4	c1run2_56_X_isl1.e8.5	0	0.0869235	4
Ets2	c1run2_56_X_isl1.e8.5	1.97574	0.0869235	4
Sall4	c1run2_56_X_isl1.e8.5	10.2367	0.0869235	4
Isl1	c1run2_61_X_isl1.e8.5	7.3545	0.019451	5
Mef2c	c1run2_61_X_isl1.e8.5	1.99109	0.019451	5
Nkx2-5	c1run2_61_X_isl1.e8.5	0	0.019451	5
Ankrd1	c1run2_61_X_isl1.e8.5	0	0.019451	5
Myocd	c1run2_61_X_isl1.e8.5	0	0.019451	5
Smyd1	c1run2_61_X_isl1.e8.5	0	0.019451	5
Gata2	c1run2_61_X_isl1.e8.5	1.99109	0.019451	5
Hand1	c1run2_61_X_isl1.e8.5	6.7431	0.019451	5
Hhex	c1run2_61_X_isl1.e8.5	0	0.019451	5
Hoxa7	c1run2_61_X_isl1.e8.5	5.9055	0.019451	5
Hoxa9	c1run2_61_X_isl1.e8.5	8.03254	0.019451	5
Hoxb6	c1run2_61_X_isl1.e8.5	0	0.019451	5
Hoxc8	c1run2_61_X_isl1.e8.5	0	0.019451	5
Msx1	c1run2_61_X_isl1.e8.5	6.70246	0.019451	5
Pitx1	c1run2_61_X_isl1.e8.5	5.15836	0.019451	5
Nkx1-2	c1run2_61_X_isl1.e8.5	0	0.019451	5
Snai1	c1run2_61_X_isl1.e8.5	8.92771	0.019451	5
Tbx3	c1run2_61_X_isl1.e8.5	9.81782	0.019451	5
Tbx4	c1run2_61_X_isl1.e8.5	9.96253	0.019451	5
Ets2	c1run2_61_X_isl1.e8.5	5.96557	0.019451	5
Sall4	c1run2_61_X_isl1.e8.5	12.1755	0.019451	5
Isl1	c1run2_62_X_isl1.e8.5	0.953782	0.0836588	4
Mef2c	c1run2_62_X_isl1.e8.5	1.523	0.0836588	4
Nkx2-5	c1run2_62_X_isl1.e8.5	0	0.0836588	4
Ankrd1	c1run2_62_X_isl1.e8.5	0	0.0836588	4
Myocd	c1run2_62_X_isl1.e8.5	0	0.0836588	4
Smyd1	c1run2_62_X_isl1.e8.5	0	0.0836588	4
Gata2	c1run2_62_X_isl1.e8.5	0	0.0836588	4
Hand1	c1run2_62_X_isl1.e8.5	0	0.0836588	4
Hhex	c1run2_62_X_isl1.e8.5	0	0.0836588	4
Hoxa7	c1run2_62_X_isl1.e8.5	0	0.0836588	4
Hoxa9	c1run2_62_X_isl1.e8.5	0	0.0836588	4
Hoxb6	c1run2_62_X_isl1.e8.5	0	0.0836588	4
Hoxc8	c1run2_62_X_isl1.e8.5	0	0.0836588	4
Msx1	c1run2_62_X_isl1.e8.5	0	0.0836588	4
Pitx1	c1run2_62_X_isl1.e8.5	0	0.0836588	4
Nkx1-2	c1run2_62_X_isl1.e8.5	0	0.0836588	4
Snai1	c1run2_62_X_isl1.e8.5	9.32824	0.0836588	4
Tbx3	c1run2_62_X_isl1.e8.5	0	0.0836588	4
Tbx4	c1run2_62_X_isl1.e8.5	0	0.0836588	4
Ets2	c1run2_62_X_isl1.e8.5	0	0.0836588	4
Sall4	c1run2_62_X_isl1.e8.5	8.79194	0.0836588	4
Isl1	c1run2_63_X_isl1.e8.5	8.41802	0.0859313	4
Mef2c	c1run2_63_X_isl1.e8.5	5.94204	0.0859313	4
Nkx2-5	c1run2_63_X_isl1.e8.5	0	0.0859313	4
Ankrd1	c1run2_63_X_isl1.e8.5	0	0.0859313	4
Myocd	c1run2_63_X_isl1.e8.5	5.56071	0.0859313	4
Smyd1	c1run2_63_X_isl1.e8.5	0	0.0859313	4
Gata2	c1run2_63_X_isl1.e8.5	0	0.0859313	4
Hand1	c1run2_63_X_isl1.e8.5	0	0.0859313	4
Hhex	c1run2_63_X_isl1.e8.5	0	0.0859313	4
Hoxa7	c1run2_63_X_isl1.e8.5	2.37851	0.0859313	4
Hoxa9	c1run2_63_X_isl1.e8.5	0	0.0859313	4
Hoxb6	c1run2_63_X_isl1.e8.5	0	0.0859313	4
Hoxc8	c1run2_63_X_isl1.e8.5	0	0.0859313	4
Msx1	c1run2_63_X_isl1.e8.5	3.76553	0.0859313	4
Pitx1	c1run2_63_X_isl1.e8.5	0	0.0859313	4
Nkx1-2	c1run2_63_X_isl1.e8.5	0	0.0859313	4
Snai1	c1run2_63_X_isl1.e8.5	0	0.0859313	4
Tbx3	c1run2_63_X_isl1.e8.5	6.40938	0.0859313	4
Tbx4	c1run2_63_X_isl1.e8.5	1.81557	0.0859313	4
Ets2	c1run2_63_X_isl1.e8.5	6.8058	0.0859313	4
Sall4	c1run2_63_X_isl1.e8.5	6.71644	0.0859313	4
Isl1	c1run2_68_X_isl1.e8.5	8.85493	0.0325978	5
Mef2c	c1run2_68_X_isl1.e8.5	1.05448	0.0325978	5
Nkx2-5	c1run2_68_X_isl1.e8.5	0	0.0325978	5
Ankrd1	c1run2_68_X_isl1.e8.5	0	0.0325978	5
Myocd	c1run2_68_X_isl1.e8.5	0	0.0325978	5
Smyd1	c1run2_68_X_isl1.e8.5	0	0.0325978	5
Gata2	c1run2_68_X_isl1.e8.5	0	0.0325978	5
Hand1	c1run2_68_X_isl1.e8.5	10.6137	0.0325978	5
Hhex	c1run2_68_X_isl1.e8.5	2.08096	0.0325978	5
Hoxa7	c1run2_68_X_isl1.e8.5	7.74097	0.0325978	5
Hoxa9	c1run2_68_X_isl1.e8.5	9.07543	0.0325978	5
Hoxb6	c1run2_68_X_isl1.e8.5	6.84748	0.0325978	5
Hoxc8	c1run2_68_X_isl1.e8.5	7.57399	0.0325978	5
Msx1	c1run2_68_X_isl1.e8.5	7.35422	0.0325978	5
Pitx1	c1run2_68_X_isl1.e8.5	1.05448	0.0325978	5
Nkx1-2	c1run2_68_X_isl1.e8.5	8.28653	0.0325978	5
Snai1	c1run2_68_X_isl1.e8.5	8.38741	0.0325978	5
Tbx3	c1run2_68_X_isl1.e8.5	8.81408	0.0325978	5
Tbx4	c1run2_68_X_isl1.e8.5	6.67574	0.0325978	5
Ets2	c1run2_68_X_isl1.e8.5	0	0.0325978	5
Sall4	c1run2_68_X_isl1.e8.5	11.6063	0.0325978	5
Isl1	c1run2_74_X_isl1.e8.5	6.06422	0.00900546	5
Mef2c	c1run2_74_X_isl1.e8.5	0	0.00900546	5
Nkx2-5	c1run2_74_X_isl1.e8.5	0	0.00900546	5
Ankrd1	c1run2_74_X_isl1.e8.5	0	0.00900546	5
Myocd	c1run2_74_X_isl1.e8.5	0	0.00900546	5
Smyd1	c1run2_74_X_isl1.e8.5	0	0.00900546	5
Gata2	c1run2_74_X_isl1.e8.5	0	0.00900546	5
Hand1	c1run2_74_X_isl1.e8.5	9.40348	0.00900546	5
Hhex	c1run2_74_X_isl1.e8.5	0	0.00900546	5
Hoxa7	c1run2_74_X_isl1.e8.5	7.48262	0.00900546	5
Hoxa9	c1run2_74_X_isl1.e8.5	4.17701	0.00900546	5
Hoxb6	c1run2_74_X_isl1.e8.5	6.89473	0.00900546	5
Hoxc8	c1run2_74_X_isl1.e8.5	6.51294	0.00900546	5
Msx1	c1run2_74_X_isl1.e8.5	7.65235	0.00900546	5
Pitx1	c1run2_74_X_isl1.e8.5	4.95923	0.00900546	5
Nkx1-2	c1run2_74_X_isl1.e8.5	9.82577	0.00900546	5
Snai1	c1run2_74_X_isl1.e8.5	7.49855	0.00900546	5
Tbx3	c1run2_74_X_isl1.e8.5	7.33367	0.00900546	5
Tbx4	c1run2_74_X_isl1.e8.5	8.50428	0.00900546	5
Ets2	c1run2_74_X_isl1.e8.5	0	0.00900546	5
Sall4	c1run2_74_X_isl1.e8.5	11.822	0.00900546	5
Isl1	c1run2_75_X_isl1.e8.5	0	0.0852595	4
Mef2c	c1run2_75_X_isl1.e8.5	0	0.0852595	4
Nkx2-5	c1run2_75_X_isl1.e8.5	0	0.0852595	4
Ankrd1	c1run2_75_X_isl1.e8.5	2.1518	0.0852595	4
Myocd	c1run2_75_X_isl1.e8.5	0	0.0852595	4
Smyd1	c1run2_75_X_isl1.e8.5	0	0.0852595	4
Gata2	c1run2_75_X_isl1.e8.5	0	0.0852595	4
Hand1	c1run2_75_X_isl1.e8.5	2.97959	0.0852595	4
Hhex	c1run2_75_X_isl1.e8.5	0	0.0852595	4
Hoxa7	c1run2_75_X_isl1.e8.5	0	0.0852595	4
Hoxa9	c1run2_75_X_isl1.e8.5	0	0.0852595	4
Hoxb6	c1run2_75_X_isl1.e8.5	0	0.0852595	4
Hoxc8	c1run2_75_X_isl1.e8.5	0	0.0852595	4
Msx1	c1run2_75_X_isl1.e8.5	7.51981	0.0852595	4
Pitx1	c1run2_75_X_isl1.e8.5	0	0.0852595	4
Nkx1-2	c1run2_75_X_isl1.e8.5	0	0.0852595	4
Snai1	c1run2_75_X_isl1.e8.5	7.41697	0.0852595	4
Tbx3	c1run2_75_X_isl1.e8.5	6.5366	0.0852595	4
Tbx4	c1run2_75_X_isl1.e8.5	0	0.0852595	4
Ets2	c1run2_75_X_isl1.e8.5	0	0.0852595	4
Sall4	c1run2_75_X_isl1.e8.5	7.15174	0.0852595	4
Isl1	c1run2_81_X_isl1.e8.5	5.80163	0.089433	4
Mef2c	c1run2_81_X_isl1.e8.5	0	0.089433	4
Nkx2-5	c1run2_81_X_isl1.e8.5	0	0.089433	4
Ankrd1	c1run2_81_X_isl1.e8.5	0	0.089433	4
Myocd	c1run2_81_X_isl1.e8.5	0	0.089433	4
Smyd1	c1run2_81_X_isl1.e8.5	0	0.089433	4
Gata2	c1run2_81_X_isl1.e8.5	0	0.089433	4
Hand1	c1run2_81_X_isl1.e8.5	0	0.089433	4
Hhex	c1run2_81_X_isl1.e8.5	1.45365	0.089433	4
Hoxa7	c1run2_81_X_isl1.e8.5	0	0.089433	4
Hoxa9	c1run2_81_X_isl1.e8.5	0	0.089433	4
Hoxb6	c1run2_81_X_isl1.e8.5	0	0.089433	4
Hoxc8	c1run2_81_X_isl1.e8.5	0	0.089433	4
Msx1	c1run2_81_X_isl1.e8.5	0	0.089433	4
Pitx1	c1run2_81_X_isl1.e8.5	0	0.089433	4
Nkx1-2	c1run2_81_X_isl1.e8.5	0	0.089433	4
Snai1	c1run2_81_X_isl1.e8.5	0.902651	0.089433	4
Tbx3	c1run2_81_X_isl1.e8.5	0	0.089433	4
Tbx4	c1run2_81_X_isl1.e8.5	0	0.089433	4
Ets2	c1run2_81_X_isl1.e8.5	3.62099	0.089433	4
Sall4	c1run2_81_X_isl1.e8.5	11.1225	0.089433	4
Isl1	c1run2_91_X_isl1.e8.5	5.23944	0.0186516	5
Mef2c	c1run2_91_X_isl1.e8.5	0	0.0186516	5
Nkx2-5	c1run2_91_X_isl1.e8.5	0	0.0186516	5
Ankrd1	c1run2_91_X_isl1.e8.5	0	0.0186516	5
Myocd	c1run2_91_X_isl1.e8.5	0	0.0186516	5
Smyd1	c1run2_91_X_isl1.e8.5	0	0.0186516	5
Gata2	c1run2_91_X_isl1.e8.5	0	0.0186516	5
Hand1	c1run2_91_X_isl1.e8.5	9.726	0.0186516	5
Hhex	c1run2_91_X_isl1.e8.5	0	0.0186516	5
Hoxa7	c1run2_91_X_isl1.e8.5	9.14451	0.0186516	5
Hoxa9	c1run2_91_X_isl1.e8.5	8.60498	0.0186516	5
Hoxb6	c1run2_91_X_isl1.e8.5	6.92634	0.0186516	5
Hoxc8	c1run2_91_X_isl1.e8.5	6.24841	0.0186516	5
Msx1	c1run2_91_X_isl1.e8.5	7.66205	0.0186516	5
Pitx1	c1run2_91_X_isl1.e8.5	7.25287	0.0186516	5
Nkx1-2	c1run2_91_X_isl1.e8.5	8.53233	0.0186516	5
Snai1	c1run2_91_X_isl1.e8.5	7.90277	0.0186516	5
Tbx3	c1run2_91_X_isl1.e8.5	6.45605	0.0186516	5
Tbx4	c1run2_91_X_isl1.e8.5	5.29455	0.0186516	5
Ets2	c1run2_91_X_isl1.e8.5	0	0.0186516	5
Sall4	c1run2_91_X_isl1.e8.5	11.7347	0.0186516	5
Isl1	c1run3_01_X_isl1.e9.5	8.83628	0.0981812	3
Mef2c	c1run3_01_X_isl1.e9.5	0.70791	0.0981812	3
Nkx2-5	c1run3_01_X_isl1.e9.5	0	0.0981812	3
Ankrd1	c1run3_01_X_isl1.e9.5	5.44096	0.0981812	3
Myocd	c1run3_01_X_isl1.e9.5	0	0.0981812	3
Smyd1	c1run3_01_X_isl1.e9.5	0	0.0981812	3
Gata2	c1run3_01_X_isl1.e9.5	2.99418	0.0981812	3
Hand1	c1run3_01_X_isl1.e9.5	0	0.0981812	3
Hhex	c1run3_01_X_isl1.e9.5	0	0.0981812	3
Hoxa7	c1run3_01_X_isl1.e9.5	0	0.0981812	3
Hoxa9	c1run3_01_X_isl1.e9.5	0	0.0981812	3
Hoxb6	c1run3_01_X_isl1.e9.5	0	0.0981812	3
Hoxc8	c1run3_01_X_isl1.e9.5	0	0.0981812	3
Msx1	c1run3_01_X_isl1.e9.5	4.97292	0.0981812	3
Pitx1	c1run3_01_X_isl1.e9.5	0	0.0981812	3
Nkx1-2	c1run3_01_X_isl1.e9.5	0	0.0981812	3
Snai1	c1run3_01_X_isl1.e9.5	0	0.0981812	3
Tbx3	c1run3_01_X_isl1.e9.5	6.14319	0.0981812	3
Tbx4	c1run3_01_X_isl1.e9.5	0	0.0981812	3
Ets2	c1run3_01_X_isl1.e9.5	0	0.0981812	3
Sall4	c1run3_01_X_isl1.e9.5	3.10454	0.0981812	3
Isl1	c1run3_02_X_isl1.e9.5	0	0.287036	2
Mef2c	c1run3_02_X_isl1.e9.5	10.4347	0.287036	2
Nkx2-5	c1run3_02_X_isl1.e9.5	0	0.287036	2
Ankrd1	c1run3_02_X_isl1.e9.5	11.2516	0.287036	2
Myocd	c1run3_02_X_isl1.e9.5	9.88444	0.287036	2
Smyd1	c1run3_02_X_isl1.e9.5	0	0.287036	2
Gata2	c1run3_02_X_isl1.e9.5	0	0.287036	2
Hand1	c1run3_02_X_isl1.e9.5	0	0.287036	2
Hhex	c1run3_02_X_isl1.e9.5	0	0.287036	2
Hoxa7	c1run3_02_X_isl1.e9.5	0	0.287036	2
Hoxa9	c1run3_02_X_isl1.e9.5	0	0.287036	2
Hoxb6	c1run3_02_X_isl1.e9.5	0	0.287036	2
Hoxc8	c1run3_02_X_isl1.e9.5	0	0.287036	2
Msx1	c1run3_02_X_isl1.e9.5	0	0.287036	2
Pitx1	c1run3_02_X_isl1.e9.5	0	0.287036	2
Nkx1-2	c1run3_02_X_isl1.e9.5	0	0.287036	2
Snai1	c1run3_02_X_isl1.e9.5	0	0.287036	2
Tbx3	c1run3_02_X_isl1.e9.5	0	0.287036	2
Tbx4	c1run3_02_X_isl1.e9.5	0	0.287036	2
Ets2	c1run3_02_X_isl1.e9.5	0	0.287036	2
Sall4	c1run3_02_X_isl1.e9.5	0	0.287036	2
Isl1	c1run3_03_X_isl1.e9.5	9.05427	0.0861183	3
Mef2c	c1run3_03_X_isl1.e9.5	5.29263	0.0861183	3
Nkx2-5	c1run3_03_X_isl1.e9.5	0	0.0861183	3
Ankrd1	c1run3_03_X_isl1.e9.5	6.13628	0.0861183	3
Myocd	c1run3_03_X_isl1.e9.5	0	0.0861183	3
Smyd1	c1run3_03_X_isl1.e9.5	0	0.0861183	3
Gata2	c1run3_03_X_isl1.e9.5	0	0.0861183	3
Hand1	c1run3_03_X_isl1.e9.5	10.6737	0.0861183	3
Hhex	c1run3_03_X_isl1.e9.5	0	0.0861183	3
Hoxa7	c1run3_03_X_isl1.e9.5	0	0.0861183	3
Hoxa9	c1run3_03_X_isl1.e9.5	0	0.0861183	3
Hoxb6	c1run3_03_X_isl1.e9.5	0	0.0861183	3
Hoxc8	c1run3_03_X_isl1.e9.5	0	0.0861183	3
Msx1	c1run3_03_X_isl1.e9.5	9.10904	0.0861183	3
Pitx1	c1run3_03_X_isl1.e9.5	0	0.0861183	3
Nkx1-2	c1run3_03_X_isl1.e9.5	0	0.0861183	3
Snai1	c1run3_03_X_isl1.e9.5	0	0.0861183	3
Tbx3	c1run3_03_X_isl1.e9.5	9.07957	0.0861183	3
Tbx4	c1run3_03_X_isl1.e9.5	0	0.0861183	3
Ets2	c1run3_03_X_isl1.e9.5	6.76982	0.0861183	3
Sall4	c1run3_03_X_isl1.e9.5	7.61106	0.0861183	3
Isl1	c1run3_04_X_isl1.e9.5	1.97699	0.0913533	3
Mef2c	c1run3_04_X_isl1.e9.5	0	0.0913533	3
Nkx2-5	c1run3_04_X_isl1.e9.5	0	0.0913533	3
Ankrd1	c1run3_04_X_isl1.e9.5	5.24803	0.0913533	3
Myocd	c1run3_04_X_isl1.e9.5	0	0.0913533	3
Smyd1	c1run3_04_X_isl1.e9.5	0	0.0913533	3
Gata2	c1run3_04_X_isl1.e9.5	0	0.0913533	3
Hand1	c1run3_04_X_isl1.e9.5	0	0.0913533	3
Hhex	c1run3_04_X_isl1.e9.5	9.74571	0.0913533	3
Hoxa7	c1run3_04_X_isl1.e9.5	0	0.0913533	3
Hoxa9	c1run3_04_X_isl1.e9.5	0	0.0913533	3
Hoxb6	c1run3_04_X_isl1.e9.5	0	0.0913533	3
Hoxc8	c1run3_04_X_isl1.e9.5	0	0.0913533	3
Msx1	c1run3_04_X_isl1.e9.5	0	0.0913533	3
Pitx1	c1run3_04_X_isl1.e9.5	0	0.0913533	3
Nkx1-2	c1run3_04_X_isl1.e9.5	0	0.0913533	3
Snai1	c1run3_04_X_isl1.e9.5	0	0.0913533	3
Tbx3	c1run3_04_X_isl1.e9.5	6.92369	0.0913533	3
Tbx4	c1run3_04_X_isl1.e9.5	0	0.0913533	3
Ets2	c1run3_04_X_isl1.e9.5	0	0.0913533	3
Sall4	c1run3_04_X_isl1.e9.5	10.1841	0.0913533	3
Isl1	c1run3_05_X_isl1.e9.5	0.693184	0.437276	2
Mef2c	c1run3_05_X_isl1.e9.5	11.2258	0.437276	2
Nkx2-5	c1run3_05_X_isl1.e9.5	5.78875	0.437276	2
Ankrd1	c1run3_05_X_isl1.e9.5	12.7846	0.437276	2
Myocd	c1run3_05_X_isl1.e9.5	5.80476	0.437276	2
Smyd1	c1run3_05_X_isl1.e9.5	4.23944	0.437276	2
Gata2	c1run3_05_X_isl1.e9.5	0	0.437276	2
Hand1	c1run3_05_X_isl1.e9.5	0	0.437276	2
Hhex	c1run3_05_X_isl1.e9.5	0	0.437276	2
Hoxa7	c1run3_05_X_isl1.e9.5	0	0.437276	2
Hoxa9	c1run3_05_X_isl1.e9.5	0	0.437276	2
Hoxb6	c1run3_05_X_isl1.e9.5	0	0.437276	2
Hoxc8	c1run3_05_X_isl1.e9.5	0	0.437276	2
Msx1	c1run3_05_X_isl1.e9.5	0	0.437276	2
Pitx1	c1run3_05_X_isl1.e9.5	0	0.437276	2
Nkx1-2	c1run3_05_X_isl1.e9.5	0	0.437276	2
Snai1	c1run3_05_X_isl1.e9.5	0	0.437276	2
Tbx3	c1run3_05_X_isl1.e9.5	7.53958	0.437276	2
Tbx4	c1run3_05_X_isl1.e9.5	0	0.437276	2
Ets2	c1run3_05_X_isl1.e9.5	9.15727	0.437276	2
Sall4	c1run3_05_X_isl1.e9.5	4.45765	0.437276	2
Isl1	c1run3_06_X_isl1.e9.5	8.66687	0.0926132	3
Mef2c	c1run3_06_X_isl1.e9.5	1.3039	0.0926132	3
Nkx2-5	c1run3_06_X_isl1.e9.5	0	0.0926132	3
Ankrd1	c1run3_06_X_isl1.e9.5	0	0.0926132	3
Myocd	c1run3_06_X_isl1.e9.5	0.794501	0.0926132	3
Smyd1	c1run3_06_X_isl1.e9.5	0	0.0926132	3
Gata2	c1run3_06_X_isl1.e9.5	0	0.0926132	3
Hand1	c1run3_06_X_isl1.e9.5	0	0.0926132	3
Hhex	c1run3_06_X_isl1.e9.5	0	0.0926132	3
Hoxa7	c1run3_06_X_isl1.e9.5	0	0.0926132	3
Hoxa9	c1run3_06_X_isl1.e9.5	0	0.0926132	3
Hoxb6	c1run3_06_X_isl1.e9.5	0	0.0926132	3
Hoxc8	c1run3_06_X_isl1.e9.5	0	0.0926132	3
Msx1	c1run3_06_X_isl1.e9.5	0	0.0926132	3
Pitx1	c1run3_06_X_isl1.e9.5	0	0.0926132	3
Nkx1-2	c1run3_06_X_isl1.e9.5	0	0.0926132	3
Snai1	c1run3_06_X_isl1.e9.5	0	0.0926132	3
Tbx3	c1run3_06_X_isl1.e9.5	5.12043	0.0926132	3
Tbx4	c1run3_06_X_isl1.e9.5	0	0.0926132	3
Ets2	c1run3_06_X_isl1.e9.5	8.52162	0.0926132	3
Sall4	c1run3_06_X_isl1.e9.5	0	0.0926132	3
Isl1	c1run3_07_X_isl1.e9.5	9.79486	0.0965511	3
Mef2c	c1run3_07_X_isl1.e9.5	4.02014	0.0965511	3
Nkx2-5	c1run3_07_X_isl1.e9.5	0	0.0965511	3
Ankrd1	c1run3_07_X_isl1.e9.5	0	0.0965511	3
Myocd	c1run3_07_X_isl1.e9.5	0	0.0965511	3
Smyd1	c1run3_07_X_isl1.e9.5	0	0.0965511	3
Gata2	c1run3_07_X_isl1.e9.5	0	0.0965511	3
Hand1	c1run3_07_X_isl1.e9.5	0	0.0965511	3
Hhex	c1run3_07_X_isl1.e9.5	0	0.0965511	3
Hoxa7	c1run3_07_X_isl1.e9.5	0	0.0965511	3
Hoxa9	c1run3_07_X_isl1.e9.5	0	0.0965511	3
Hoxb6	c1run3_07_X_isl1.e9.5	0	0.0965511	3
Hoxc8	c1run3_07_X_isl1.e9.5	0	0.0965511	3
Msx1	c1run3_07_X_isl1.e9.5	0	0.0965511	3
Pitx1	c1run3_07_X_isl1.e9.5	0	0.0965511	3
Nkx1-2	c1run3_07_X_isl1.e9.5	0	0.0965511	3
Snai1	c1run3_07_X_isl1.e9.5	0	0.0965511	3
Tbx3	c1run3_07_X_isl1.e9.5	6.2044	0.0965511	3
Tbx4	c1run3_07_X_isl1.e9.5	0	0.0965511	3
Ets2	c1run3_07_X_isl1.e9.5	0	0.0965511	3
Sall4	c1run3_07_X_isl1.e9.5	6.8372	0.0965511	3
Isl1	c1run3_09_X_isl1.e9.5	1.36561	0.0991652	4
Mef2c	c1run3_09_X_isl1.e9.5	0.838693	0.0991652	4
Nkx2-5	c1run3_09_X_isl1.e9.5	0	0.0991652	4
Ankrd1	c1run3_09_X_isl1.e9.5	1.36561	0.0991652	4
Myocd	c1run3_09_X_isl1.e9.5	0	0.0991652	4
Smyd1	c1run3_09_X_isl1.e9.5	0	0.0991652	4
Gata2	c1run3_09_X_isl1.e9.5	0	0.0991652	4
Hand1	c1run3_09_X_isl1.e9.5	0	0.0991652	4
Hhex	c1run3_09_X_isl1.e9.5	0	0.0991652	4
Hoxa7	c1run3_09_X_isl1.e9.5	0	0.0991652	4
Hoxa9	c1run3_09_X_isl1.e9.5	0	0.0991652	4
Hoxb6	c1run3_09_X_isl1.e9.5	0	0.0991652	4
Hoxc8	c1run3_09_X_isl1.e9.5	0	0.0991652	4
Msx1	c1run3_09_X_isl1.e9.5	0	0.0991652	4
Pitx1	c1run3_09_X_isl1.e9.5	0	0.0991652	4
Nkx1-2	c1run3_09_X_isl1.e9.5	0	0.0991652	4
Snai1	c1run3_09_X_isl1.e9.5	0	0.0991652	4
Tbx3	c1run3_09_X_isl1.e9.5	0	0.0991652	4
Tbx4	c1run3_09_X_isl1.e9.5	0	0.0991652	4
Ets2	c1run3_09_X_isl1.e9.5	0.838693	0.0991652	4
Sall4	c1run3_09_X_isl1.e9.5	10.0741	0.0991652	4
Isl1	c1run3_11_X_isl1.e9.5	9.59651	0.0912315	3
Mef2c	c1run3_11_X_isl1.e9.5	0	0.0912315	3
Nkx2-5	c1run3_11_X_isl1.e9.5	1.50969	0.0912315	3
Ankrd1	c1run3_11_X_isl1.e9.5	0	0.0912315	3
Myocd	c1run3_11_X_isl1.e9.5	2.23111	0.0912315	3
Smyd1	c1run3_11_X_isl1.e9.5	0	0.0912315	3
Gata2	c1run3_11_X_isl1.e9.5	0	0.0912315	3
Hand1	c1run3_11_X_isl1.e9.5	7.09582	0.0912315	3
Hhex	c1run3_11_X_isl1.e9.5	0	0.0912315	3
Hoxa7	c1run3_11_X_isl1.e9.5	0	0.0912315	3
Hoxa9	c1run3_11_X_isl1.e9.5	0	0.0912315	3
Hoxb6	c1run3_11_X_isl1.e9.5	3.21935	0.0912315	3
Hoxc8	c1run3_11_X_isl1.e9.5	0	0.0912315	3
Msx1	c1run3_11_X_isl1.e9.5	0	0.0912315	3
Pitx1	c1run3_11_X_isl1.e9.5	0	0.0912315	3
Nkx1-2	c1run3_11_X_isl1.e9.5	0	0.0912315	3
Snai1	c1run3_11_X_isl1.e9.5	0.943913	0.0912315	3
Tbx3	c1run3_11_X_isl1.e9.5	6.27929	0.0912315	3
Tbx4	c1run3_11_X_isl1.e9.5	0	0.0912315	3
Ets2	c1run3_11_X_isl1.e9.5	5.56032	0.0912315	3
Sall4	c1run3_11_X_isl1.e9.5	10.2377	0.0912315	3
Isl1	c1run3_13_X_isl1.e9.5	8.39848	0.0966728	3
Mef2c	c1run3_13_X_isl1.e9.5	11.2132	0.0966728	3
Nkx2-5	c1run3_13_X_isl1.e9.5	0	0.0966728	3
Ankrd1	c1run3_13_X_isl1.e9.5	1.48996	0.0966728	3
Myocd	c1run3_13_X_isl1.e9.5	0	0.0966728	3
Smyd1	c1run3_13_X_isl1.e9.5	6.48594	0.0966728	3
Gata2	c1run3_13_X_isl1.e9.5	0	0.0966728	3
Hand1	c1run3_13_X_isl1.e9.5	0	0.0966728	3
Hhex	c1run3_13_X_isl1.e9.5	0	0.0966728	3
Hoxa7	c1run3_13_X_isl1.e9.5	0	0.0966728	3
Hoxa9	c1run3_13_X_isl1.e9.5	0	0.0966728	3
Hoxb6	c1run3_13_X_isl1.e9.5	0	0.0966728	3
Hoxc8	c1run3_13_X_isl1.e9.5	0	0.0966728	3
Msx1	c1run3_13_X_isl1.e9.5	0	0.0966728	3
Pitx1	c1run3_13_X_isl1.e9.5	0	0.0966728	3
Nkx1-2	c1run3_13_X_isl1.e9.5	0	0.0966728	3
Snai1	c1run3_13_X_isl1.e9.5	0	0.0966728	3
Tbx3	c1run3_13_X_isl1.e9.5	1.48996	0.0966728	3
Tbx4	c1run3_13_X_isl1.e9.5	0	0.0966728	3
Ets2	c1run3_13_X_isl1.e9.5	0	0.0966728	3
Sall4	c1run3_13_X_isl1.e9.5	8.39848	0.0966728	3
Isl1	c1run3_14_X_isl1.e9.5	10.5634	0.0968001	3
Mef2c	c1run3_14_X_isl1.e9.5	4.70506	0.0968001	3
Nkx2-5	c1run3_14_X_isl1.e9.5	0	0.0968001	3
Ankrd1	c1run3_14_X_isl1.e9.5	0	0.0968001	3
Myocd	c1run3_14_X_isl1.e9.5	0	0.0968001	3
Smyd1	c1run3_14_X_isl1.e9.5	0	0.0968001	3
Gata2	c1run3_14_X_isl1.e9.5	0	0.0968001	3
Hand1	c1run3_14_X_isl1.e9.5	0	0.0968001	3
Hhex	c1run3_14_X_isl1.e9.5	0	0.0968001	3
Hoxa7	c1run3_14_X_isl1.e9.5	0	0.0968001	3
Hoxa9	c1run3_14_X_isl1.e9.5	0	0.0968001	3
Hoxb6	c1run3_14_X_isl1.e9.5	5.02385	0.0968001	3
Hoxc8	c1run3_14_X_isl1.e9.5	0	0.0968001	3
Msx1	c1run3_14_X_isl1.e9.5	0	0.0968001	3
Pitx1	c1run3_14_X_isl1.e9.5	0	0.0968001	3
Nkx1-2	c1run3_14_X_isl1.e9.5	0	0.0968001	3
Snai1	c1run3_14_X_isl1.e9.5	0	0.0968001	3
Tbx3	c1run3_14_X_isl1.e9.5	1.95109	0.0968001	3
Tbx4	c1run3_14_X_isl1.e9.5	0	0.0968001	3
Ets2	c1run3_14_X_isl1.e9.5	4.95884	0.0968001	3
Sall4	c1run3_14_X_isl1.e9.5	10.7353	0.0968001	3
Isl1	c1run3_15_X_isl1.e9.5	2.47916	0.468497	2
Mef2c	c1run3_15_X_isl1.e9.5	4.32665	0.468497	2
Nkx2-5	c1run3_15_X_isl1.e9.5	5.97206	0.468497	2
Ankrd1	c1run3_15_X_isl1.e9.5	8.1299	0.468497	2
Myocd	c1run3_15_X_isl1.e9.5	10.8906	0.468497	2
Smyd1	c1run3_15_X_isl1.e9.5	7.51179	0.468497	2
Gata2	c1run3_15_X_isl1.e9.5	0	0.468497	2
Hand1	c1run3_15_X_isl1.e9.5	0	0.468497	2
Hhex	c1run3_15_X_isl1.e9.5	0	0.468497	2
Hoxa7	c1run3_15_X_isl1.e9.5	0	0.468497	2
Hoxa9	c1run3_15_X_isl1.e9.5	0	0.468497	2
Hoxb6	c1run3_15_X_isl1.e9.5	0	0.468497	2
Hoxc8	c1run3_15_X_isl1.e9.5	0	0.468497	2
Msx1	c1run3_15_X_isl1.e9.5	0	0.468497	2
Pitx1	c1run3_15_X_isl1.e9.5	0	0.468497	2
Nkx1-2	c1run3_15_X_isl1.e9.5	0	0.468497	2
Snai1	c1run3_15_X_isl1.e9.5	0	0.468497	2
Tbx3	c1run3_15_X_isl1.e9.5	4.48243	0.468497	2
Tbx4	c1run3_15_X_isl1.e9.5	0	0.468497	2
Ets2	c1run3_15_X_isl1.e9.5	0	0.468497	2
Sall4	c1run3_15_X_isl1.e9.5	5.07865	0.468497	2
Isl1	c1run3_17_X_isl1.e9.5	6.95689	0.0929939	4
Mef2c	c1run3_17_X_isl1.e9.5	2.45878	0.0929939	4
Nkx2-5	c1run3_17_X_isl1.e9.5	0	0.0929939	4
Ankrd1	c1run3_17_X_isl1.e9.5	2.45878	0.0929939	4
Myocd	c1run3_17_X_isl1.e9.5	0.925623	0.0929939	4
Smyd1	c1run3_17_X_isl1.e9.5	0	0.0929939	4
Gata2	c1run3_17_X_isl1.e9.5	0	0.0929939	4
Hand1	c1run3_17_X_isl1.e9.5	0.925623	0.0929939	4
Hhex	c1run3_17_X_isl1.e9.5	0	0.0929939	4
Hoxa7	c1run3_17_X_isl1.e9.5	0	0.0929939	4
Hoxa9	c1run3_17_X_isl1.e9.5	0	0.0929939	4
Hoxb6	c1run3_17_X_isl1.e9.5	0	0.0929939	4
Hoxc8	c1run3_17_X_isl1.e9.5	0	0.0929939	4
Msx1	c1run3_17_X_isl1.e9.5	0	0.0929939	4
Pitx1	c1run3_17_X_isl1.e9.5	0	0.0929939	4
Nkx1-2	c1run3_17_X_isl1.e9.5	0	0.0929939	4
Snai1	c1run3_17_X_isl1.e9.5	0	0.0929939	4
Tbx3	c1run3_17_X_isl1.e9.5	1.48492	0.0929939	4
Tbx4	c1run3_17_X_isl1.e9.5	0	0.0929939	4
Ets2	c1run3_17_X_isl1.e9.5	0	0.0929939	4
Sall4	c1run3_17_X_isl1.e9.5	7.6808	0.0929939	4
Isl1	c1run3_22_X_isl1.e9.5	9.87636	0.105064	3
Mef2c	c1run3_22_X_isl1.e9.5	10.2756	0.105064	3
Nkx2-5	c1run3_22_X_isl1.e9.5	2.87534	0.105064	3
Ankrd1	c1run3_22_X_isl1.e9.5	0	0.105064	3
Myocd	c1run3_22_X_isl1.e9.5	0	0.105064	3
Smyd1	c1run3_22_X_isl1.e9.5	0	0.105064	3
Gata2	c1run3_22_X_isl1.e9.5	0	0.105064	3
Hand1	c1run3_22_X_isl1.e9.5	0	0.105064	3
Hhex	c1run3_22_X_isl1.e9.5	0	0.105064	3
Hoxa7	c1run3_22_X_isl1.e9.5	0	0.105064	3
Hoxa9	c1run3_22_X_isl1.e9.5	0	0.105064	3
Hoxb6	c1run3_22_X_isl1.e9.5	0	0.105064	3
Hoxc8	c1run3_22_X_isl1.e9.5	0	0.105064	3
Msx1	c1run3_22_X_isl1.e9.5	5.88131	0.105064	3
Pitx1	c1run3_22_X_isl1.e9.5	0	0.105064	3
Nkx1-2	c1run3_22_X_isl1.e9.5	0	0.105064	3
Snai1	c1run3_22_X_isl1.e9.5	5.44472	0.105064	3
Tbx3	c1run3_22_X_isl1.e9.5	9.36066	0.105064	3
Tbx4	c1run3_22_X_isl1.e9.5	0	0.105064	3
Ets2	c1run3_22_X_isl1.e9.5	2.20839	0.105064	3
Sall4	c1run3_22_X_isl1.e9.5	3.86601	0.105064	3
Isl1	c1run3_23_X_isl1.e9.5	9.25001	0.0942561	3
Mef2c	c1run3_23_X_isl1.e9.5	10.1334	0.0942561	3
Nkx2-5	c1run3_23_X_isl1.e9.5	0	0.0942561	3
Ankrd1	c1run3_23_X_isl1.e9.5	0.729956	0.0942561	3
Myocd	c1run3_23_X_isl1.e9.5	0.729956	0.0942561	3
Smyd1	c1run3_23_X_isl1.e9.5	0	0.0942561	3
Gata2	c1run3_23_X_isl1.e9.5	0	0.0942561	3
Hand1	c1run3_23_X_isl1.e9.5	0	0.0942561	3
Hhex	c1run3_23_X_isl1.e9.5	0	0.0942561	3
Hoxa7	c1run3_23_X_isl1.e9.5	0	0.0942561	3
Hoxa9	c1run3_23_X_isl1.e9.5	0	0.0942561	3
Hoxb6	c1run3_23_X_isl1.e9.5	0	0.0942561	3
Hoxc8	c1run3_23_X_isl1.e9.5	0	0.0942561	3
Msx1	c1run3_23_X_isl1.e9.5	0	0.0942561	3
Pitx1	c1run3_23_X_isl1.e9.5	0	0.0942561	3
Nkx1-2	c1run3_23_X_isl1.e9.5	0	0.0942561	3
Snai1	c1run3_23_X_isl1.e9.5	0	0.0942561	3
Tbx3	c1run3_23_X_isl1.e9.5	5.2434	0.0942561	3
Tbx4	c1run3_23_X_isl1.e9.5	0	0.0942561	3
Ets2	c1run3_23_X_isl1.e9.5	0	0.0942561	3
Sall4	c1run3_23_X_isl1.e9.5	8.61787	0.0942561	3
Isl1	c1run3_24_X_isl1.e9.5	7.27942	0.0986103	3
Mef2c	c1run3_24_X_isl1.e9.5	0.828348	0.0986103	3
Nkx2-5	c1run3_24_X_isl1.e9.5	0	0.0986103	3
Ankrd1	c1run3_24_X_isl1.e9.5	2.03654	0.0986103	3
Myocd	c1run3_24_X_isl1.e9.5	0	0.0986103	3
Smyd1	c1run3_24_X_isl1.e9.5	6.29582	0.0986103	3
Gata2	c1run3_24_X_isl1.e9.5	0	0.0986103	3
Hand1	c1run3_24_X_isl1.e9.5	0	0.0986103	3
Hhex	c1run3_24_X_isl1.e9.5	0	0.0986103	3
Hoxa7	c1run3_24_X_isl1.e9.5	0	0.0986103	3
Hoxa9	c1run3_24_X_isl1.e9.5	0	0.0986103	3
Hoxb6	c1run3_24_X_isl1.e9.5	0	0.0986103	3
Hoxc8	c1run3_24_X_isl1.e9.5	0	0.0986103	3
Msx1	c1run3_24_X_isl1.e9.5	4.64646	0.0986103	3
Pitx1	c1run3_24_X_isl1.e9.5	0	0.0986103	3
Nkx1-2	c1run3_24_X_isl1.e9.5	0	0.0986103	3
Snai1	c1run3_24_X_isl1.e9.5	0	0.0986103	3
Tbx3	c1run3_24_X_isl1.e9.5	0	0.0986103	3
Tbx4	c1run3_24_X_isl1.e9.5	0	0.0986103	3
Ets2	c1run3_24_X_isl1.e9.5	0.828348	0.0986103	3
Sall4	c1run3_24_X_isl1.e9.5	5.10236	0.0986103	3
Isl1	c1run3_26_X_isl1.e9.5	9.19346	0.0851559	4
Mef2c	c1run3_26_X_isl1.e9.5	9.75408	0.0851559	4
Nkx2-5	c1run3_26_X_isl1.e9.5	0	0.0851559	4
Ankrd1	c1run3_26_X_isl1.e9.5	3.56737	0.0851559	4
Myocd	c1run3_26_X_isl1.e9.5	0	0.0851559	4
Smyd1	c1run3_26_X_isl1.e9.5	0	0.0851559	4
Gata2	c1run3_26_X_isl1.e9.5	0	0.0851559	4
Hand1	c1run3_26_X_isl1.e9.5	0	0.0851559	4
Hhex	c1run3_26_X_isl1.e9.5	0	0.0851559	4
Hoxa7	c1run3_26_X_isl1.e9.5	0	0.0851559	4
Hoxa9	c1run3_26_X_isl1.e9.5	0	0.0851559	4
Hoxb6	c1run3_26_X_isl1.e9.5	0	0.0851559	4
Hoxc8	c1run3_26_X_isl1.e9.5	0	0.0851559	4
Msx1	c1run3_26_X_isl1.e9.5	5.93351	0.0851559	4
Pitx1	c1run3_26_X_isl1.e9.5	5.87314	0.0851559	4
Nkx1-2	c1run3_26_X_isl1.e9.5	0	0.0851559	4
Snai1	c1run3_26_X_isl1.e9.5	8.13724	0.0851559	4
Tbx3	c1run3_26_X_isl1.e9.5	6.75322	0.0851559	4
Tbx4	c1run3_26_X_isl1.e9.5	0	0.0851559	4
Ets2	c1run3_26_X_isl1.e9.5	0	0.0851559	4
Sall4	c1run3_26_X_isl1.e9.5	9.74569	0.0851559	4
Isl1	c1run3_27_X_isl1.e9.5	7.53891	0.0910299	3
Mef2c	c1run3_27_X_isl1.e9.5	9.40474	0.0910299	3
Nkx2-5	c1run3_27_X_isl1.e9.5	0	0.0910299	3
Ankrd1	c1run3_27_X_isl1.e9.5	4.31594	0.0910299	3
Myocd	c1run3_27_X_isl1.e9.5	1.03629	0.0910299	3
Smyd1	c1run3_27_X_isl1.e9.5	0	0.0910299	3
Gata2	c1run3_27_X_isl1.e9.5	0	0.0910299	3
Hand1	c1run3_27_X_isl1.e9.5	10.5555	0.0910299	3
Hhex	c1run3_27_X_isl1.e9.5	0	0.0910299	3
Hoxa7	c1run3_27_X_isl1.e9.5	0	0.0910299	3
Hoxa9	c1run3_27_X_isl1.e9.5	0	0.0910299	3
Hoxb6	c1run3_27_X_isl1.e9.5	5.95315	0.0910299	3
Hoxc8	c1run3_27_X_isl1.e9.5	3.65082	0.0910299	3
Msx1	c1run3_27_X_isl1.e9.5	0	0.0910299	3
Pitx1	c1run3_27_X_isl1.e9.5	0	0.0910299	3
Nkx1-2	c1run3_27_X_isl1.e9.5	0	0.0910299	3
Snai1	c1run3_27_X_isl1.e9.5	0	0.0910299	3
Tbx3	c1run3_27_X_isl1.e9.5	6.70035	0.0910299	3
Tbx4	c1run3_27_X_isl1.e9.5	0	0.0910299	3
Ets2	c1run3_27_X_isl1.e9.5	5.7983	0.0910299	3
Sall4	c1run3_27_X_isl1.e9.5	5.71415	0.0910299	3
Isl1	c1run3_29_X_isl1.e9.5	10.9792	0.0943691	3
Mef2c	c1run3_29_X_isl1.e9.5	0	0.0943691	3
Nkx2-5	c1run3_29_X_isl1.e9.5	4.96667	0.0943691	3
Ankrd1	c1run3_29_X_isl1.e9.5	0.845235	0.0943691	3
Myocd	c1run3_29_X_isl1.e9.5	1.76115	0.0943691	3
Smyd1	c1run3_29_X_isl1.e9.5	0	0.0943691	3
Gata2	c1run3_29_X_isl1.e9.5	0	0.0943691	3
Hand1	c1run3_29_X_isl1.e9.5	0	0.0943691	3
Hhex	c1run3_29_X_isl1.e9.5	0	0.0943691	3
Hoxa7	c1run3_29_X_isl1.e9.5	0	0.0943691	3
Hoxa9	c1run3_29_X_isl1.e9.5	0	0.0943691	3
Hoxb6	c1run3_29_X_isl1.e9.5	0.845235	0.0943691	3
Hoxc8	c1run3_29_X_isl1.e9.5	0	0.0943691	3
Msx1	c1run3_29_X_isl1.e9.5	0	0.0943691	3
Pitx1	c1run3_29_X_isl1.e9.5	0	0.0943691	3
Nkx1-2	c1run3_29_X_isl1.e9.5	0	0.0943691	3
Snai1	c1run3_29_X_isl1.e9.5	0	0.0943691	3
Tbx3	c1run3_29_X_isl1.e9.5	8.50871	0.0943691	3
Tbx4	c1run3_29_X_isl1.e9.5	0	0.0943691	3
Ets2	c1run3_29_X_isl1.e9.5	0	0.0943691	3
Sall4	c1run3_29_X_isl1.e9.5	6.02774	0.0943691	3
Isl1	c1run3_30_X_isl1.e9.5	8.90819	0.0967553	3
Mef2c	c1run3_30_X_isl1.e9.5	0	0.0967553	3
Nkx2-5	c1run3_30_X_isl1.e9.5	0	0.0967553	3
Ankrd1	c1run3_30_X_isl1.e9.5	0	0.0967553	3
Myocd	c1run3_30_X_isl1.e9.5	0	0.0967553	3
Smyd1	c1run3_30_X_isl1.e9.5	0	0.0967553	3
Gata2	c1run3_30_X_isl1.e9.5	0	0.0967553	3
Hand1	c1run3_30_X_isl1.e9.5	0	0.0967553	3
Hhex	c1run3_30_X_isl1.e9.5	0	0.0967553	3
Hoxa7	c1run3_30_X_isl1.e9.5	2.52615	0.0967553	3
Hoxa9	c1run3_30_X_isl1.e9.5	0	0.0967553	3
Hoxb6	c1run3_30_X_isl1.e9.5	0	0.0967553	3
Hoxc8	c1run3_30_X_isl1.e9.5	0	0.0967553	3
Msx1	c1run3_30_X_isl1.e9.5	0	0.0967553	3
Pitx1	c1run3_30_X_isl1.e9.5	0	0.0967553	3
Nkx1-2	c1run3_30_X_isl1.e9.5	0	0.0967553	3
Snai1	c1run3_30_X_isl1.e9.5	0	0.0967553	3
Tbx3	c1run3_30_X_isl1.e9.5	0	0.0967553	3
Tbx4	c1run3_30_X_isl1.e9.5	0	0.0967553	3
Ets2	c1run3_30_X_isl1.e9.5	0	0.0967553	3
Sall4	c1run3_30_X_isl1.e9.5	3.48552	0.0967553	3
Isl1	c1run3_31_X_isl1.e9.5	9.2699	0.0938679	3
Mef2c	c1run3_31_X_isl1.e9.5	0.776816	0.0938679	3
Nkx2-5	c1run3_31_X_isl1.e9.5	0	0.0938679	3
Ankrd1	c1run3_31_X_isl1.e9.5	2.89144	0.0938679	3
Myocd	c1run3_31_X_isl1.e9.5	0	0.0938679	3
Smyd1	c1run3_31_X_isl1.e9.5	0	0.0938679	3
Gata2	c1run3_31_X_isl1.e9.5	0	0.0938679	3
Hand1	c1run3_31_X_isl1.e9.5	0	0.0938679	3
Hhex	c1run3_31_X_isl1.e9.5	0	0.0938679	3
Hoxa7	c1run3_31_X_isl1.e9.5	0	0.0938679	3
Hoxa9	c1run3_31_X_isl1.e9.5	0	0.0938679	3
Hoxb6	c1run3_31_X_isl1.e9.5	0	0.0938679	3
Hoxc8	c1run3_31_X_isl1.e9.5	0	0.0938679	3
Msx1	c1run3_31_X_isl1.e9.5	0	0.0938679	3
Pitx1	c1run3_31_X_isl1.e9.5	0	0.0938679	3
Nkx1-2	c1run3_31_X_isl1.e9.5	0	0.0938679	3
Snai1	c1run3_31_X_isl1.e9.5	0	0.0938679	3
Tbx3	c1run3_31_X_isl1.e9.5	4.73771	0.0938679	3
Tbx4	c1run3_31_X_isl1.e9.5	0	0.0938679	3
Ets2	c1run3_31_X_isl1.e9.5	3.45771	0.0938679	3
Sall4	c1run3_31_X_isl1.e9.5	8.80362	0.0938679	3
Isl1	c1run3_32_X_isl1.e9.5	9.82522	0.0946579	3
Mef2c	c1run3_32_X_isl1.e9.5	7.13802	0.0946579	3
Nkx2-5	c1run3_32_X_isl1.e9.5	0	0.0946579	3
Ankrd1	c1run3_32_X_isl1.e9.5	1.39817	0.0946579	3
Myocd	c1run3_32_X_isl1.e9.5	0	0.0946579	3
Smyd1	c1run3_32_X_isl1.e9.5	0	0.0946579	3
Gata2	c1run3_32_X_isl1.e9.5	0	0.0946579	3
Hand1	c1run3_32_X_isl1.e9.5	0	0.0946579	3
Hhex	c1run3_32_X_isl1.e9.5	0.862223	0.0946579	3
Hoxa7	c1run3_32_X_isl1.e9.5	0	0.0946579	3
Hoxa9	c1run3_32_X_isl1.e9.5	0	0.0946579	3
Hoxb6	c1run3_32_X_isl1.e9.5	0	0.0946579	3
Hoxc8	c1run3_32_X_isl1.e9.5	0	0.0946579	3
Msx1	c1run3_32_X_isl1.e9.5	0	0.0946579	3
Pitx1	c1run3_32_X_isl1.e9.5	0	0.0946579	3
Nkx1-2	c1run3_32_X_isl1.e9.5	0	0.0946579	3
Snai1	c1run3_32_X_isl1.e9.5	0	0.0946579	3
Tbx3	c1run3_32_X_isl1.e9.5	8.40066	0.0946579	3
Tbx4	c1run3_32_X_isl1.e9.5	0	0.0946579	3
Ets2	c1run3_32_X_isl1.e9.5	0	0.0946579	3
Sall4	c1run3_32_X_isl1.e9.5	8.49525	0.0946579	3
Isl1	c1run3_33_X_isl1.e9.5	10.211	0.0926196	3
Mef2c	c1run3_33_X_isl1.e9.5	2.09472	0.0926196	3
Nkx2-5	c1run3_33_X_isl1.e9.5	0	0.0926196	3
Ankrd1	c1run3_33_X_isl1.e9.5	3.92373	0.0926196	3
Myocd	c1run3_33_X_isl1.e9.5	1.06383	0.0926196	3
Smyd1	c1run3_33_X_isl1.e9.5	0	0.0926196	3
Gata2	c1run3_33_X_isl1.e9.5	0	0.0926196	3
Hand1	c1run3_33_X_isl1.e9.5	7.91883	0.0926196	3
Hhex	c1run3_33_X_isl1.e9.5	0	0.0926196	3
Hoxa7	c1run3_33_X_isl1.e9.5	3.92062	0.0926196	3
Hoxa9	c1run3_33_X_isl1.e9.5	0	0.0926196	3
Hoxb6	c1run3_33_X_isl1.e9.5	8.20133	0.0926196	3
Hoxc8	c1run3_33_X_isl1.e9.5	0	0.0926196	3
Msx1	c1run3_33_X_isl1.e9.5	0	0.0926196	3
Pitx1	c1run3_33_X_isl1.e9.5	0	0.0926196	3
Nkx1-2	c1run3_33_X_isl1.e9.5	0	0.0926196	3
Snai1	c1run3_33_X_isl1.e9.5	0	0.0926196	3
Tbx3	c1run3_33_X_isl1.e9.5	4.28821	0.0926196	3
Tbx4	c1run3_33_X_isl1.e9.5	0	0.0926196	3
Ets2	c1run3_33_X_isl1.e9.5	0	0.0926196	3
Sall4	c1run3_33_X_isl1.e9.5	7.51656	0.0926196	3
Isl1	c1run3_35_X_isl1.e9.5	4.51349	0.0984331	3
Mef2c	c1run3_35_X_isl1.e9.5	3.80139	0.0984331	3
Nkx2-5	c1run3_35_X_isl1.e9.5	6.38382	0.0984331	3
Ankrd1	c1run3_35_X_isl1.e9.5	6.8154	0.0984331	3
Myocd	c1run3_35_X_isl1.e9.5	6.49149	0.0984331	3
Smyd1	c1run3_35_X_isl1.e9.5	0	0.0984331	3
Gata2	c1run3_35_X_isl1.e9.5	0.855103	0.0984331	3
Hand1	c1run3_35_X_isl1.e9.5	0	0.0984331	3
Hhex	c1run3_35_X_isl1.e9.5	0	0.0984331	3
Hoxa7	c1run3_35_X_isl1.e9.5	0.855103	0.0984331	3
Hoxa9	c1run3_35_X_isl1.e9.5	0	0.0984331	3
Hoxb6	c1run3_35_X_isl1.e9.5	2.33469	0.0984331	3
Hoxc8	c1run3_35_X_isl1.e9.5	0	0.0984331	3
Msx1	c1run3_35_X_isl1.e9.5	0	0.0984331	3
Pitx1	c1run3_35_X_isl1.e9.5	0	0.0984331	3
Nkx1-2	c1run3_35_X_isl1.e9.5	0	0.0984331	3
Snai1	c1run3_35_X_isl1.e9.5	0.855103	0.0984331	3
Tbx3	c1run3_35_X_isl1.e9.5	4.70462	0.0984331	3
Tbx4	c1run3_35_X_isl1.e9.5	0	0.0984331	3
Ets2	c1run3_35_X_isl1.e9.5	0	0.0984331	3
Sall4	c1run3_35_X_isl1.e9.5	7.60831	0.0984331	3
Isl1	c1run3_36_X_isl1.e9.5	10.1482	0.0941394	3
Mef2c	c1run3_36_X_isl1.e9.5	0.660157	0.0941394	3
Nkx2-5	c1run3_36_X_isl1.e9.5	0	0.0941394	3
Ankrd1	c1run3_36_X_isl1.e9.5	2.76608	0.0941394	3
Myocd	c1run3_36_X_isl1.e9.5	0	0.0941394	3
Smyd1	c1run3_36_X_isl1.e9.5	0	0.0941394	3
Gata2	c1run3_36_X_isl1.e9.5	0	0.0941394	3
Hand1	c1run3_36_X_isl1.e9.5	10.0106	0.0941394	3
Hhex	c1run3_36_X_isl1.e9.5	2.16399	0.0941394	3
Hoxa7	c1run3_36_X_isl1.e9.5	0	0.0941394	3
Hoxa9	c1run3_36_X_isl1.e9.5	0	0.0941394	3
Hoxb6	c1run3_36_X_isl1.e9.5	0	0.0941394	3
Hoxc8	c1run3_36_X_isl1.e9.5	0	0.0941394	3
Msx1	c1run3_36_X_isl1.e9.5	0	0.0941394	3
Pitx1	c1run3_36_X_isl1.e9.5	0	0.0941394	3
Nkx1-2	c1run3_36_X_isl1.e9.5	0	0.0941394	3
Snai1	c1run3_36_X_isl1.e9.5	0	0.0941394	3
Tbx3	c1run3_36_X_isl1.e9.5	0.660157	0.0941394	3
Tbx4	c1run3_36_X_isl1.e9.5	0	0.0941394	3
Ets2	c1run3_36_X_isl1.e9.5	0.660157	0.0941394	3
Sall4	c1run3_36_X_isl1.e9.5	10.1086	0.0941394	3
Isl1	c1run3_39_X_isl1.e9.5	9.69156	0.106314	3
Mef2c	c1run3_39_X_isl1.e9.5	9.4322	0.106314	3
Nkx2-5	c1run3_39_X_isl1.e9.5	0	0.106314	3
Ankrd1	c1run3_39_X_isl1.e9.5	6.18772	0.106314	3
Myocd	c1run3_39_X_isl1.e9.5	0.892099	0.106314	3
Smyd1	c1run3_39_X_isl1.e9.5	0	0.106314	3
Gata2	c1run3_39_X_isl1.e9.5	0	0.106314	3
Hand1	c1run3_39_X_isl1.e9.5	0	0.106314	3
Hhex	c1run3_39_X_isl1.e9.5	2.40037	0.106314	3
Hoxa7	c1run3_39_X_isl1.e9.5	0	0.106314	3
Hoxa9	c1run3_39_X_isl1.e9.5	0	0.106314	3
Hoxb6	c1run3_39_X_isl1.e9.5	0	0.106314	3
Hoxc8	c1run3_39_X_isl1.e9.5	0	0.106314	3
Msx1	c1run3_39_X_isl1.e9.5	2.97214	0.106314	3
Pitx1	c1run3_39_X_isl1.e9.5	0	0.106314	3
Nkx1-2	c1run3_39_X_isl1.e9.5	0	0.106314	3
Snai1	c1run3_39_X_isl1.e9.5	0.892099	0.106314	3
Tbx3	c1run3_39_X_isl1.e9.5	8.09816	0.106314	3
Tbx4	c1run3_39_X_isl1.e9.5	0	0.106314	3
Ets2	c1run3_39_X_isl1.e9.5	4.03613	0.106314	3
Sall4	c1run3_39_X_isl1.e9.5	2.14519	0.106314	3
Isl1	c1run3_44_X_isl1.e9.5	8.84439	0.0937738	3
Mef2c	c1run3_44_X_isl1.e9.5	7.01195	0.0937738	3
Nkx2-5	c1run3_44_X_isl1.e9.5	3.69075	0.0937738	3
Ankrd1	c1run3_44_X_isl1.e9.5	0	0.0937738	3
Myocd	c1run3_44_X_isl1.e9.5	0	0.0937738	3
Smyd1	c1run3_44_X_isl1.e9.5	0	0.0937738	3
Gata2	c1run3_44_X_isl1.e9.5	0	0.0937738	3
Hand1	c1run3_44_X_isl1.e9.5	0	0.0937738	3
Hhex	c1run3_44_X_isl1.e9.5	0	0.0937738	3
Hoxa7	c1run3_44_X_isl1.e9.5	1.69318	0.0937738	3
Hoxa9	c1run3_44_X_isl1.e9.5	0	0.0937738	3
Hoxb6	c1run3_44_X_isl1.e9.5	0	0.0937738	3
Hoxc8	c1run3_44_X_isl1.e9.5	0	0.0937738	3
Msx1	c1run3_44_X_isl1.e9.5	0	0.0937738	3
Pitx1	c1run3_44_X_isl1.e9.5	0	0.0937738	3
Nkx1-2	c1run3_44_X_isl1.e9.5	0	0.0937738	3
Snai1	c1run3_44_X_isl1.e9.5	1.69318	0.0937738	3
Tbx3	c1run3_44_X_isl1.e9.5	2.45085	0.0937738	3
Tbx4	c1run3_44_X_isl1.e9.5	0	0.0937738	3
Ets2	c1run3_44_X_isl1.e9.5	0	0.0937738	3
Sall4	c1run3_44_X_isl1.e9.5	4.54454	0.0937738	3
Isl1	c1run3_49_X_isl1.e9.5	9.27442	0.123786	3
Mef2c	c1run3_49_X_isl1.e9.5	2.98909	0.123786	3
Nkx2-5	c1run3_49_X_isl1.e9.5	0	0.123786	3
Ankrd1	c1run3_49_X_isl1.e9.5	5.61315	0.123786	3
Myocd	c1run3_49_X_isl1.e9.5	8.69429	0.123786	3
Smyd1	c1run3_49_X_isl1.e9.5	5.73778	0.123786	3
Gata2	c1run3_49_X_isl1.e9.5	6.89452	0.123786	3
Hand1	c1run3_49_X_isl1.e9.5	0	0.123786	3
Hhex	c1run3_49_X_isl1.e9.5	0	0.123786	3
Hoxa7	c1run3_49_X_isl1.e9.5	0	0.123786	3
Hoxa9	c1run3_49_X_isl1.e9.5	0	0.123786	3
Hoxb6	c1run3_49_X_isl1.e9.5	0	0.123786	3
Hoxc8	c1run3_49_X_isl1.e9.5	0	0.123786	3
Msx1	c1run3_49_X_isl1.e9.5	0	0.123786	3
Pitx1	c1run3_49_X_isl1.e9.5	0	0.123786	3
Nkx1-2	c1run3_49_X_isl1.e9.5	0	0.123786	3
Snai1	c1run3_49_X_isl1.e9.5	0	0.123786	3
Tbx3	c1run3_49_X_isl1.e9.5	5.88365	0.123786	3
Tbx4	c1run3_49_X_isl1.e9.5	0	0.123786	3
Ets2	c1run3_49_X_isl1.e9.5	0	0.123786	3
Sall4	c1run3_49_X_isl1.e9.5	0.705654	0.123786	3
Isl1	c1run3_50_X_isl1.e9.5	2.44631	0.551607	2
Mef2c	c1run3_50_X_isl1.e9.5	10.0101	0.551607	2
Nkx2-5	c1run3_50_X_isl1.e9.5	5.43552	0.551607	2
Ankrd1	c1run3_50_X_isl1.e9.5	14.3776	0.551607	2
Myocd	c1run3_50_X_isl1.e9.5	2.7143	0.551607	2
Smyd1	c1run3_50_X_isl1.e9.5	8.57971	0.551607	2
Gata2	c1run3_50_X_isl1.e9.5	0	0.551607	2
Hand1	c1run3_50_X_isl1.e9.5	0	0.551607	2
Hhex	c1run3_50_X_isl1.e9.5	0	0.551607	2
Hoxa7	c1run3_50_X_isl1.e9.5	0	0.551607	2
Hoxa9	c1run3_50_X_isl1.e9.5	0	0.551607	2
Hoxb6	c1run3_50_X_isl1.e9.5	0	0.551607	2
Hoxc8	c1run3_50_X_isl1.e9.5	0	0.551607	2
Msx1	c1run3_50_X_isl1.e9.5	0	0.551607	2
Pitx1	c1run3_50_X_isl1.e9.5	0	0.551607	2
Nkx1-2	c1run3_50_X_isl1.e9.5	0	0.551607	2
Snai1	c1run3_50_X_isl1.e9.5	0	0.551607	2
Tbx3	c1run3_50_X_isl1.e9.5	1.68934	0.551607	2
Tbx4	c1run3_50_X_isl1.e9.5	0	0.551607	2
Ets2	c1run3_50_X_isl1.e9.5	1.68934	0.551607	2
Sall4	c1run3_50_X_isl1.e9.5	8.87462	0.551607	2
Isl1	c1run3_51_X_isl1.e9.5	10.0234	0.0919803	3
Mef2c	c1run3_51_X_isl1.e9.5	6.79724	0.0919803	3
Nkx2-5	c1run3_51_X_isl1.e9.5	0	0.0919803	3
Ankrd1	c1run3_51_X_isl1.e9.5	1.15357	0.0919803	3
Myocd	c1run3_51_X_isl1.e9.5	0	0.0919803	3
Smyd1	c1run3_51_X_isl1.e9.5	0	0.0919803	3
Gata2	c1run3_51_X_isl1.e9.5	0	0.0919803	3
Hand1	c1run3_51_X_isl1.e9.5	8.80338	0.0919803	3
Hhex	c1run3_51_X_isl1.e9.5	0	0.0919803	3
Hoxa7	c1run3_51_X_isl1.e9.5	0	0.0919803	3
Hoxa9	c1run3_51_X_isl1.e9.5	0	0.0919803	3
Hoxb6	c1run3_51_X_isl1.e9.5	3.25889	0.0919803	3
Hoxc8	c1run3_51_X_isl1.e9.5	0	0.0919803	3
Msx1	c1run3_51_X_isl1.e9.5	7.7987	0.0919803	3
Pitx1	c1run3_51_X_isl1.e9.5	0	0.0919803	3
Nkx1-2	c1run3_51_X_isl1.e9.5	0	0.0919803	3
Snai1	c1run3_51_X_isl1.e9.5	0	0.0919803	3
Tbx3	c1run3_51_X_isl1.e9.5	9.35795	0.0919803	3
Tbx4	c1run3_51_X_isl1.e9.5	0	0.0919803	3
Ets2	c1run3_51_X_isl1.e9.5	0	0.0919803	3
Sall4	c1run3_51_X_isl1.e9.5	10.6726	0.0919803	3
Isl1	c1run3_52_X_isl1.e9.5	7.15501	0.0984368	3
Mef2c	c1run3_52_X_isl1.e9.5	0.787215	0.0984368	3
Nkx2-5	c1run3_52_X_isl1.e9.5	0	0.0984368	3
Ankrd1	c1run3_52_X_isl1.e9.5	0.787215	0.0984368	3
Myocd	c1run3_52_X_isl1.e9.5	0	0.0984368	3
Smyd1	c1run3_52_X_isl1.e9.5	0	0.0984368	3
Gata2	c1run3_52_X_isl1.e9.5	0	0.0984368	3
Hand1	c1run3_52_X_isl1.e9.5	0	0.0984368	3
Hhex	c1run3_52_X_isl1.e9.5	0	0.0984368	3
Hoxa7	c1run3_52_X_isl1.e9.5	0	0.0984368	3
Hoxa9	c1run3_52_X_isl1.e9.5	0	0.0984368	3
Hoxb6	c1run3_52_X_isl1.e9.5	0	0.0984368	3
Hoxc8	c1run3_52_X_isl1.e9.5	0	0.0984368	3
Msx1	c1run3_52_X_isl1.e9.5	0	0.0984368	3
Pitx1	c1run3_52_X_isl1.e9.5	0	0.0984368	3
Nkx1-2	c1run3_52_X_isl1.e9.5	0	0.0984368	3
Snai1	c1run3_52_X_isl1.e9.5	0	0.0984368	3
Tbx3	c1run3_52_X_isl1.e9.5	0	0.0984368	3
Tbx4	c1run3_52_X_isl1.e9.5	0	0.0984368	3
Ets2	c1run3_52_X_isl1.e9.5	0	0.0984368	3
Sall4	c1run3_52_X_isl1.e9.5	9.80124	0.0984368	3
Isl1	c1run3_53_X_isl1.e9.5	5.57812	0.127777	3
Mef2c	c1run3_53_X_isl1.e9.5	4.33159	0.127777	3
Nkx2-5	c1run3_53_X_isl1.e9.5	0	0.127777	3
Ankrd1	c1run3_53_X_isl1.e9.5	8.444	0.127777	3
Myocd	c1run3_53_X_isl1.e9.5	11.0372	0.127777	3
Smyd1	c1run3_53_X_isl1.e9.5	1.64434	0.127777	3
Gata2	c1run3_53_X_isl1.e9.5	0	0.127777	3
Hand1	c1run3_53_X_isl1.e9.5	0	0.127777	3
Hhex	c1run3_53_X_isl1.e9.5	0	0.127777	3
Hoxa7	c1run3_53_X_isl1.e9.5	0	0.127777	3
Hoxa9	c1run3_53_X_isl1.e9.5	0	0.127777	3
Hoxb6	c1run3_53_X_isl1.e9.5	0	0.127777	3
Hoxc8	c1run3_53_X_isl1.e9.5	0	0.127777	3
Msx1	c1run3_53_X_isl1.e9.5	0	0.127777	3
Pitx1	c1run3_53_X_isl1.e9.5	0	0.127777	3
Nkx1-2	c1run3_53_X_isl1.e9.5	0	0.127777	3
Snai1	c1run3_53_X_isl1.e9.5	0	0.127777	3
Tbx3	c1run3_53_X_isl1.e9.5	0.772883	0.127777	3
Tbx4	c1run3_53_X_isl1.e9.5	0	0.127777	3
Ets2	c1run3_53_X_isl1.e9.5	0	0.127777	3
Sall4	c1run3_53_X_isl1.e9.5	2.5755	0.127777	3
Isl1	c1run3_54_X_isl1.e9.5	8.16763	0.126934	3
Mef2c	c1run3_54_X_isl1.e9.5	3.5723	0.126934	3
Nkx2-5	c1run3_54_X_isl1.e9.5	0	0.126934	3
Ankrd1	c1run3_54_X_isl1.e9.5	2.68875	0.126934	3
Myocd	c1run3_54_X_isl1.e9.5	7.75971	0.126934	3
Smyd1	c1run3_54_X_isl1.e9.5	7.32255	0.126934	3
Gata2	c1run3_54_X_isl1.e9.5	0	0.126934	3
Hand1	c1run3_54_X_isl1.e9.5	0	0.126934	3
Hhex	c1run3_54_X_isl1.e9.5	0	0.126934	3
Hoxa7	c1run3_54_X_isl1.e9.5	0	0.126934	3
Hoxa9	c1run3_54_X_isl1.e9.5	0	0.126934	3
Hoxb6	c1run3_54_X_isl1.e9.5	0	0.126934	3
Hoxc8	c1run3_54_X_isl1.e9.5	0	0.126934	3
Msx1	c1run3_54_X_isl1.e9.5	0	0.126934	3
Pitx1	c1run3_54_X_isl1.e9.5	0	0.126934	3
Nkx1-2	c1run3_54_X_isl1.e9.5	0	0.126934	3
Snai1	c1run3_54_X_isl1.e9.5	0	0.126934	3
Tbx3	c1run3_54_X_isl1.e9.5	0	0.126934	3
Tbx4	c1run3_54_X_isl1.e9.5	0	0.126934	3
Ets2	c1run3_54_X_isl1.e9.5	0	0.126934	3
Sall4	c1run3_54_X_isl1.e9.5	1.06317	0.126934	3
Isl1	c1run3_57_X_isl1.e9.5	7.38649	0.0959484	3
Mef2c	c1run3_57_X_isl1.e9.5	1.52575	0.0959484	3
Nkx2-5	c1run3_57_X_isl1.e9.5	0	0.0959484	3
Ankrd1	c1run3_57_X_isl1.e9.5	0	0.0959484	3
Myocd	c1run3_57_X_isl1.e9.5	0	0.0959484	3
Smyd1	c1run3_57_X_isl1.e9.5	0	0.0959484	3
Gata2	c1run3_57_X_isl1.e9.5	0	0.0959484	3
Hand1	c1run3_57_X_isl1.e9.5	0	0.0959484	3
Hhex	c1run3_57_X_isl1.e9.5	0	0.0959484	3
Hoxa7	c1run3_57_X_isl1.e9.5	0	0.0959484	3
Hoxa9	c1run3_57_X_isl1.e9.5	0	0.0959484	3
Hoxb6	c1run3_57_X_isl1.e9.5	0	0.0959484	3
Hoxc8	c1run3_57_X_isl1.e9.5	0	0.0959484	3
Msx1	c1run3_57_X_isl1.e9.5	4.37388	0.0959484	3
Pitx1	c1run3_57_X_isl1.e9.5	0	0.0959484	3
Nkx1-2	c1run3_57_X_isl1.e9.5	0	0.0959484	3
Snai1	c1run3_57_X_isl1.e9.5	0	0.0959484	3
Tbx3	c1run3_57_X_isl1.e9.5	8.78388	0.0959484	3
Tbx4	c1run3_57_X_isl1.e9.5	0	0.0959484	3
Ets2	c1run3_57_X_isl1.e9.5	0	0.0959484	3
Sall4	c1run3_57_X_isl1.e9.5	9.879	0.0959484	3
Isl1	c1run3_59_X_isl1.e9.5	9.02511	0.378426	2
Mef2c	c1run3_59_X_isl1.e9.5	10.9835	0.378426	2
Nkx2-5	c1run3_59_X_isl1.e9.5	3.21005	0.378426	2
Ankrd1	c1run3_59_X_isl1.e9.5	11.0631	0.378426	2
Myocd	c1run3_59_X_isl1.e9.5	12.0818	0.378426	2
Smyd1	c1run3_59_X_isl1.e9.5	9.58187	0.378426	2
Gata2	c1run3_59_X_isl1.e9.5	0	0.378426	2
Hand1	c1run3_59_X_isl1.e9.5	10.7158	0.378426	2
Hhex	c1run3_59_X_isl1.e9.5	0	0.378426	2
Hoxa7	c1run3_59_X_isl1.e9.5	0.807641	0.378426	2
Hoxa9	c1run3_59_X_isl1.e9.5	0	0.378426	2
Hoxb6	c1run3_59_X_isl1.e9.5	0	0.378426	2
Hoxc8	c1run3_59_X_isl1.e9.5	0	0.378426	2
Msx1	c1run3_59_X_isl1.e9.5	0	0.378426	2
Pitx1	c1run3_59_X_isl1.e9.5	0	0.378426	2
Nkx1-2	c1run3_59_X_isl1.e9.5	0	0.378426	2
Snai1	c1run3_59_X_isl1.e9.5	0	0.378426	2
Tbx3	c1run3_59_X_isl1.e9.5	0	0.378426	2
Tbx4	c1run3_59_X_isl1.e9.5	0	0.378426	2
Ets2	c1run3_59_X_isl1.e9.5	0	0.378426	2
Sall4	c1run3_59_X_isl1.e9.5	8.1415	0.378426	2
Isl1	c1run3_60_X_isl1.e9.5	8.20561	0.0927352	4
Mef2c	c1run3_60_X_isl1.e9.5	5.96291	0.0927352	4
Nkx2-5	c1run3_60_X_isl1.e9.5	0	0.0927352	4
Ankrd1	c1run3_60_X_isl1.e9.5	0	0.0927352	4
Myocd	c1run3_60_X_isl1.e9.5	1.55995	0.0927352	4
Smyd1	c1run3_60_X_isl1.e9.5	0	0.0927352	4
Gata2	c1run3_60_X_isl1.e9.5	0	0.0927352	4
Hand1	c1run3_60_X_isl1.e9.5	0	0.0927352	4
Hhex	c1run3_60_X_isl1.e9.5	0	0.0927352	4
Hoxa7	c1run3_60_X_isl1.e9.5	0	0.0927352	4
Hoxa9	c1run3_60_X_isl1.e9.5	0	0.0927352	4
Hoxb6	c1run3_60_X_isl1.e9.5	0	0.0927352	4
Hoxc8	c1run3_60_X_isl1.e9.5	0	0.0927352	4
Msx1	c1run3_60_X_isl1.e9.5	0	0.0927352	4
Pitx1	c1run3_60_X_isl1.e9.5	6.37215	0.0927352	4
Nkx1-2	c1run3_60_X_isl1.e9.5	0	0.0927352	4
Snai1	c1run3_60_X_isl1.e9.5	0	0.0927352	4
Tbx3	c1run3_60_X_isl1.e9.5	0	0.0927352	4
Tbx4	c1run3_60_X_isl1.e9.5	0	0.0927352	4
Ets2	c1run3_60_X_isl1.e9.5	3.28805	0.0927352	4
Sall4	c1run3_60_X_isl1.e9.5	11.0411	0.0927352	4
Isl1	c1run3_63_X_isl1.e9.5	9.0261	0.0891713	3
Mef2c	c1run3_63_X_isl1.e9.5	0	0.0891713	3
Nkx2-5	c1run3_63_X_isl1.e9.5	0	0.0891713	3
Ankrd1	c1run3_63_X_isl1.e9.5	0.728578	0.0891713	3
Myocd	c1run3_63_X_isl1.e9.5	3.25415	0.0891713	3
Smyd1	c1run3_63_X_isl1.e9.5	0	0.0891713	3
Gata2	c1run3_63_X_isl1.e9.5	0	0.0891713	3
Hand1	c1run3_63_X_isl1.e9.5	7.51043	0.0891713	3
Hhex	c1run3_63_X_isl1.e9.5	0	0.0891713	3
Hoxa7	c1run3_63_X_isl1.e9.5	0	0.0891713	3
Hoxa9	c1run3_63_X_isl1.e9.5	0	0.0891713	3
Hoxb6	c1run3_63_X_isl1.e9.5	0	0.0891713	3
Hoxc8	c1run3_63_X_isl1.e9.5	0	0.0891713	3
Msx1	c1run3_63_X_isl1.e9.5	0	0.0891713	3
Pitx1	c1run3_63_X_isl1.e9.5	0	0.0891713	3
Nkx1-2	c1run3_63_X_isl1.e9.5	0	0.0891713	3
Snai1	c1run3_63_X_isl1.e9.5	0	0.0891713	3
Tbx3	c1run3_63_X_isl1.e9.5	7.75382	0.0891713	3
Tbx4	c1run3_63_X_isl1.e9.5	0	0.0891713	3
Ets2	c1run3_63_X_isl1.e9.5	0	0.0891713	3
Sall4	c1run3_63_X_isl1.e9.5	8.01721	0.0891713	3
Isl1	c1run3_64_X_isl1.e9.5	0.889023	0.535965	2
Mef2c	c1run3_64_X_isl1.e9.5	10.3791	0.535965	2
Nkx2-5	c1run3_64_X_isl1.e9.5	5.65568	0.535965	2
Ankrd1	c1run3_64_X_isl1.e9.5	12.6176	0.535965	2
Myocd	c1run3_64_X_isl1.e9.5	10.9893	0.535965	2
Smyd1	c1run3_64_X_isl1.e9.5	8.26534	0.535965	2
Gata2	c1run3_64_X_isl1.e9.5	0	0.535965	2
Hand1	c1run3_64_X_isl1.e9.5	0	0.535965	2
Hhex	c1run3_64_X_isl1.e9.5	0	0.535965	2
Hoxa7	c1run3_64_X_isl1.e9.5	0	0.535965	2
Hoxa9	c1run3_64_X_isl1.e9.5	0	0.535965	2
Hoxb6	c1run3_64_X_isl1.e9.5	0	0.535965	2
Hoxc8	c1run3_64_X_isl1.e9.5	0	0.535965	2
Msx1	c1run3_64_X_isl1.e9.5	0	0.535965	2
Pitx1	c1run3_64_X_isl1.e9.5	0	0.535965	2
Nkx1-2	c1run3_64_X_isl1.e9.5	0	0.535965	2
Snai1	c1run3_64_X_isl1.e9.5	0	0.535965	2
Tbx3	c1run3_64_X_isl1.e9.5	0	0.535965	2
Tbx4	c1run3_64_X_isl1.e9.5	0	0.535965	2
Ets2	c1run3_64_X_isl1.e9.5	0	0.535965	2
Sall4	c1run3_64_X_isl1.e9.5	7.47044	0.535965	2
Isl1	c1run3_65_X_isl1.e9.5	0.667086	0.110721	3
Mef2c	c1run3_65_X_isl1.e9.5	7.68353	0.110721	3
Nkx2-5	c1run3_65_X_isl1.e9.5	0	0.110721	3
Ankrd1	c1run3_65_X_isl1.e9.5	1.74479	0.110721	3
Myocd	c1run3_65_X_isl1.e9.5	10.1529	0.110721	3
Smyd1	c1run3_65_X_isl1.e9.5	0	0.110721	3
Gata2	c1run3_65_X_isl1.e9.5	0	0.110721	3
Hand1	c1run3_65_X_isl1.e9.5	0	0.110721	3
Hhex	c1run3_65_X_isl1.e9.5	0	0.110721	3
Hoxa7	c1run3_65_X_isl1.e9.5	0	0.110721	3
Hoxa9	c1run3_65_X_isl1.e9.5	0	0.110721	3
Hoxb6	c1run3_65_X_isl1.e9.5	0	0.110721	3
Hoxc8	c1run3_65_X_isl1.e9.5	0	0.110721	3
Msx1	c1run3_65_X_isl1.e9.5	0	0.110721	3
Pitx1	c1run3_65_X_isl1.e9.5	0	0.110721	3
Nkx1-2	c1run3_65_X_isl1.e9.5	0	0.110721	3
Snai1	c1run3_65_X_isl1.e9.5	0	0.110721	3
Tbx3	c1run3_65_X_isl1.e9.5	0.667086	0.110721	3
Tbx4	c1run3_65_X_isl1.e9.5	0	0.110721	3
Ets2	c1run3_65_X_isl1.e9.5	5.84385	0.110721	3
Sall4	c1run3_65_X_isl1.e9.5	0	0.110721	3
Isl1	c1run3_67_X_isl1.e9.5	9.39672	0.0946149	3
Mef2c	c1run3_67_X_isl1.e9.5	8.83819	0.0946149	3
Nkx2-5	c1run3_67_X_isl1.e9.5	0	0.0946149	3
Ankrd1	c1run3_67_X_isl1.e9.5	1.83805	0.0946149	3
Myocd	c1run3_67_X_isl1.e9.5	0	0.0946149	3
Smyd1	c1run3_67_X_isl1.e9.5	0	0.0946149	3
Gata2	c1run3_67_X_isl1.e9.5	0	0.0946149	3
Hand1	c1run3_67_X_isl1.e9.5	0	0.0946149	3
Hhex	c1run3_67_X_isl1.e9.5	0	0.0946149	3
Hoxa7	c1run3_67_X_isl1.e9.5	0	0.0946149	3
Hoxa9	c1run3_67_X_isl1.e9.5	0	0.0946149	3
Hoxb6	c1run3_67_X_isl1.e9.5	0	0.0946149	3
Hoxc8	c1run3_67_X_isl1.e9.5	0	0.0946149	3
Msx1	c1run3_67_X_isl1.e9.5	0	0.0946149	3
Pitx1	c1run3_67_X_isl1.e9.5	0	0.0946149	3
Nkx1-2	c1run3_67_X_isl1.e9.5	0	0.0946149	3
Snai1	c1run3_67_X_isl1.e9.5	0	0.0946149	3
Tbx3	c1run3_67_X_isl1.e9.5	9.6302	0.0946149	3
Tbx4	c1run3_67_X_isl1.e9.5	0	0.0946149	3
Ets2	c1run3_67_X_isl1.e9.5	0	0.0946149	3
Sall4	c1run3_67_X_isl1.e9.5	2.1485	0.0946149	3
Isl1	c1run3_68_X_isl1.e9.5	5.63422	0.277017	2
Mef2c	c1run3_68_X_isl1.e9.5	10.4885	0.277017	2
Nkx2-5	c1run3_68_X_isl1.e9.5	3.60323	0.277017	2
Ankrd1	c1run3_68_X_isl1.e9.5	0	0.277017	2
Myocd	c1run3_68_X_isl1.e9.5	10.7281	0.277017	2
Smyd1	c1run3_68_X_isl1.e9.5	0	0.277017	2
Gata2	c1run3_68_X_isl1.e9.5	0	0.277017	2
Hand1	c1run3_68_X_isl1.e9.5	0	0.277017	2
Hhex	c1run3_68_X_isl1.e9.5	1.00999	0.277017	2
Hoxa7	c1run3_68_X_isl1.e9.5	0	0.277017	2
Hoxa9	c1run3_68_X_isl1.e9.5	0	0.277017	2
Hoxb6	c1run3_68_X_isl1.e9.5	0	0.277017	2
Hoxc8	c1run3_68_X_isl1.e9.5	0	0.277017	2
Msx1	c1run3_68_X_isl1.e9.5	0	0.277017	2
Pitx1	c1run3_68_X_isl1.e9.5	0	0.277017	2
Nkx1-2	c1run3_68_X_isl1.e9.5	0	0.277017	2
Snai1	c1run3_68_X_isl1.e9.5	0	0.277017	2
Tbx3	c1run3_68_X_isl1.e9.5	2.01496	0.277017	2
Tbx4	c1run3_68_X_isl1.e9.5	0	0.277017	2
Ets2	c1run3_68_X_isl1.e9.5	0	0.277017	2
Sall4	c1run3_68_X_isl1.e9.5	7.70632	0.277017	2
Isl1	c1run3_71_X_isl1.e9.5	11.0867	0.0955477	3
Mef2c	c1run3_71_X_isl1.e9.5	0	0.0955477	3
Nkx2-5	c1run3_71_X_isl1.e9.5	0	0.0955477	3
Ankrd1	c1run3_71_X_isl1.e9.5	0	0.0955477	3
Myocd	c1run3_71_X_isl1.e9.5	0	0.0955477	3
Smyd1	c1run3_71_X_isl1.e9.5	0	0.0955477	3
Gata2	c1run3_71_X_isl1.e9.5	0	0.0955477	3
Hand1	c1run3_71_X_isl1.e9.5	0	0.0955477	3
Hhex	c1run3_71_X_isl1.e9.5	0	0.0955477	3
Hoxa7	c1run3_71_X_isl1.e9.5	0	0.0955477	3
Hoxa9	c1run3_71_X_isl1.e9.5	0	0.0955477	3
Hoxb6	c1run3_71_X_isl1.e9.5	0	0.0955477	3
Hoxc8	c1run3_71_X_isl1.e9.5	0	0.0955477	3
Msx1	c1run3_71_X_isl1.e9.5	0	0.0955477	3
Pitx1	c1run3_71_X_isl1.e9.5	0	0.0955477	3
Nkx1-2	c1run3_71_X_isl1.e9.5	0	0.0955477	3
Snai1	c1run3_71_X_isl1.e9.5	0	0.0955477	3
Tbx3	c1run3_71_X_isl1.e9.5	5.50346	0.0955477	3
Tbx4	c1run3_71_X_isl1.e9.5	0	0.0955477	3
Ets2	c1run3_71_X_isl1.e9.5	0	0.0955477	3
Sall4	c1run3_71_X_isl1.e9.5	0	0.0955477	3
Isl1	c1run3_72_X_isl1.e9.5	10.9987	0.0928901	3
Mef2c	c1run3_72_X_isl1.e9.5	0	0.0928901	3
Nkx2-5	c1run3_72_X_isl1.e9.5	0	0.0928901	3
Ankrd1	c1run3_72_X_isl1.e9.5	0	0.0928901	3
Myocd	c1run3_72_X_isl1.e9.5	6.60822	0.0928901	3
Smyd1	c1run3_72_X_isl1.e9.5	2.16676	0.0928901	3
Gata2	c1run3_72_X_isl1.e9.5	0	0.0928901	3
Hand1	c1run3_72_X_isl1.e9.5	0	0.0928901	3
Hhex	c1run3_72_X_isl1.e9.5	0	0.0928901	3
Hoxa7	c1run3_72_X_isl1.e9.5	0	0.0928901	3
Hoxa9	c1run3_72_X_isl1.e9.5	0	0.0928901	3
Hoxb6	c1run3_72_X_isl1.e9.5	0	0.0928901	3
Hoxc8	c1run3_72_X_isl1.e9.5	0	0.0928901	3
Msx1	c1run3_72_X_isl1.e9.5	0	0.0928901	3
Pitx1	c1run3_72_X_isl1.e9.5	0	0.0928901	3
Nkx1-2	c1run3_72_X_isl1.e9.5	0	0.0928901	3
Snai1	c1run3_72_X_isl1.e9.5	0	0.0928901	3
Tbx3	c1run3_72_X_isl1.e9.5	9.20944	0.0928901	3
Tbx4	c1run3_72_X_isl1.e9.5	0	0.0928901	3
Ets2	c1run3_72_X_isl1.e9.5	8.09397	0.0928901	3
Sall4	c1run3_72_X_isl1.e9.5	8.4222	0.0928901	3
Isl1	c1run3_73_X_isl1.e9.5	9.99814	0.490454	2
Mef2c	c1run3_73_X_isl1.e9.5	10.6152	0.490454	2
Nkx2-5	c1run3_73_X_isl1.e9.5	7.48193	0.490454	2
Ankrd1	c1run3_73_X_isl1.e9.5	13.1633	0.490454	2
[truncated: 1,886 more rows]

## Sheet: Figure_2f
symbol	cell	expression	dpt	cluster
Nkx2-5	c1run1_01_X_nkx2.5.e8.5	7.38976	0.977651	2
Ankrd1	c1run1_01_X_nkx2.5.e8.5	12.8408	0.977651	2
Cdkn2d	c1run1_01_X_nkx2.5.e8.5	6.39834	0.977651	2
Hopx	c1run1_01_X_nkx2.5.e8.5	7.97186	0.977651	2
Mef2c	c1run1_01_X_nkx2.5.e8.5	9.29033	0.977651	2
Myocd	c1run1_01_X_nkx2.5.e8.5	10.3364	0.977651	2
Smyd1	c1run1_01_X_nkx2.5.e8.5	7.70997	0.977651	2
Tbx20	c1run1_01_X_nkx2.5.e8.5	7.70997	0.977651	2
Dnmt3b	c1run1_01_X_nkx2.5.e8.5	9.3833	0.977651	2
Gata2	c1run1_01_X_nkx2.5.e8.5	0	0.977651	2
Gata3	c1run1_01_X_nkx2.5.e8.5	0	0.977651	2
Hand1	c1run1_01_X_nkx2.5.e8.5	9.70479	0.977651	2
Msx1	c1run1_01_X_nkx2.5.e8.5	0	0.977651	2
Nkx2-5	c1run1_02_X_nkx2.5.e8.5	7.19526	1.0318	2
Ankrd1	c1run1_02_X_nkx2.5.e8.5	9.77749	1.0318	2
Cdkn2d	c1run1_02_X_nkx2.5.e8.5	8.80223	1.0318	2
Hopx	c1run1_02_X_nkx2.5.e8.5	7.56131	1.0318	2
Mef2c	c1run1_02_X_nkx2.5.e8.5	4.24285	1.0318	2
Myocd	c1run1_02_X_nkx2.5.e8.5	9.93084	1.0318	2
Smyd1	c1run1_02_X_nkx2.5.e8.5	8.73039	1.0318	2
Tbx20	c1run1_02_X_nkx2.5.e8.5	8.81965	1.0318	2
Dnmt3b	c1run1_02_X_nkx2.5.e8.5	0	1.0318	2
Gata2	c1run1_02_X_nkx2.5.e8.5	0	1.0318	2
Gata3	c1run1_02_X_nkx2.5.e8.5	0	1.0318	2
Hand1	c1run1_02_X_nkx2.5.e8.5	0	1.0318	2
Msx1	c1run1_02_X_nkx2.5.e8.5	0	1.0318	2
Nkx2-5	c1run1_05_X_nkx2.5.e8.5	0.766591	0.230197	1
Ankrd1	c1run1_05_X_nkx2.5.e8.5	1.26453	0.230197	1
Cdkn2d	c1run1_05_X_nkx2.5.e8.5	2.38058	0.230197	1
Hopx	c1run1_05_X_nkx2.5.e8.5	0.766591	0.230197	1
Mef2c	c1run1_05_X_nkx2.5.e8.5	5.11519	0.230197	1
Myocd	c1run1_05_X_nkx2.5.e8.5	0	0.230197	1
Smyd1	c1run1_05_X_nkx2.5.e8.5	1.92789	0.230197	1
Tbx20	c1run1_05_X_nkx2.5.e8.5	8.85524	0.230197	1
Dnmt3b	c1run1_05_X_nkx2.5.e8.5	5.78125	0.230197	1
Gata2	c1run1_05_X_nkx2.5.e8.5	0	0.230197	1
Gata3	c1run1_05_X_nkx2.5.e8.5	0	0.230197	1
Hand1	c1run1_05_X_nkx2.5.e8.5	11.6369	0.230197	1
Msx1	c1run1_05_X_nkx2.5.e8.5	9.63319	0.230197	1
Nkx2-5	c1run1_07_X_nkx2.5.e8.5	5.11184	0.215914	1
Ankrd1	c1run1_07_X_nkx2.5.e8.5	3.93568	0.215914	1
Cdkn2d	c1run1_07_X_nkx2.5.e8.5	2.42032	0.215914	1
Hopx	c1run1_07_X_nkx2.5.e8.5	0	0.215914	1
Mef2c	c1run1_07_X_nkx2.5.e8.5	0.697633	0.215914	1
Myocd	c1run1_07_X_nkx2.5.e8.5	0.697633	0.215914	1
Smyd1	c1run1_07_X_nkx2.5.e8.5	1.80214	0.215914	1
Tbx20	c1run1_07_X_nkx2.5.e8.5	10.6295	0.215914	1
Dnmt3b	c1run1_07_X_nkx2.5.e8.5	6.24072	0.215914	1
Gata2	c1run1_07_X_nkx2.5.e8.5	0	0.215914	1
Gata3	c1run1_07_X_nkx2.5.e8.5	6.15519	0.215914	1
Hand1	c1run1_07_X_nkx2.5.e8.5	10.9456	0.215914	1
Msx1	c1run1_07_X_nkx2.5.e8.5	8.15574	0.215914	1
Nkx2-5	c1run1_08_X_nkx2.5.e8.5	7.82303	0.906816	2
Ankrd1	c1run1_08_X_nkx2.5.e8.5	12.4451	0.906816	2
Cdkn2d	c1run1_08_X_nkx2.5.e8.5	4.15365	0.906816	2
Hopx	c1run1_08_X_nkx2.5.e8.5	0	0.906816	2
Mef2c	c1run1_08_X_nkx2.5.e8.5	11.598	0.906816	2
Myocd	c1run1_08_X_nkx2.5.e8.5	10.449	0.906816	2
Smyd1	c1run1_08_X_nkx2.5.e8.5	8.33457	0.906816	2
Tbx20	c1run1_08_X_nkx2.5.e8.5	10.3751	0.906816	2
Dnmt3b	c1run1_08_X_nkx2.5.e8.5	3.53721	0.906816	2
Gata2	c1run1_08_X_nkx2.5.e8.5	3.74174	0.906816	2
Gata3	c1run1_08_X_nkx2.5.e8.5	0	0.906816	2
Hand1	c1run1_08_X_nkx2.5.e8.5	0.913882	0.906816	2
Msx1	c1run1_08_X_nkx2.5.e8.5	0	0.906816	2
Nkx2-5	c1run1_10_X_nkx2.5.e8.5	5.51911	0.247924	1
Ankrd1	c1run1_10_X_nkx2.5.e8.5	5.0222	0.247924	1
Cdkn2d	c1run1_10_X_nkx2.5.e8.5	0	0.247924	1
Hopx	c1run1_10_X_nkx2.5.e8.5	1.94983	0.247924	1
Mef2c	c1run1_10_X_nkx2.5.e8.5	2.26835	0.247924	1
Myocd	c1run1_10_X_nkx2.5.e8.5	0	0.247924	1
Smyd1	c1run1_10_X_nkx2.5.e8.5	0	0.247924	1
Tbx20	c1run1_10_X_nkx2.5.e8.5	5.97815	0.247924	1
Dnmt3b	c1run1_10_X_nkx2.5.e8.5	4.97919	0.247924	1
Gata2	c1run1_10_X_nkx2.5.e8.5	0	0.247924	1
Gata3	c1run1_10_X_nkx2.5.e8.5	0	0.247924	1
Hand1	c1run1_10_X_nkx2.5.e8.5	10.7688	0.247924	1
Msx1	c1run1_10_X_nkx2.5.e8.5	9.34433	0.247924	1
Nkx2-5	c1run1_11_X_nkx2.5.e8.5	4.16607	1.05015	2
Ankrd1	c1run1_11_X_nkx2.5.e8.5	12.6953	1.05015	2
Cdkn2d	c1run1_11_X_nkx2.5.e8.5	8.2486	1.05015	2
Hopx	c1run1_11_X_nkx2.5.e8.5	7.37098	1.05015	2
Mef2c	c1run1_11_X_nkx2.5.e8.5	9.7136	1.05015	2
Myocd	c1run1_11_X_nkx2.5.e8.5	8.12005	1.05015	2
Smyd1	c1run1_11_X_nkx2.5.e8.5	9.60879	1.05015	2
Tbx20	c1run1_11_X_nkx2.5.e8.5	6.14572	1.05015	2
Dnmt3b	c1run1_11_X_nkx2.5.e8.5	0.99796	1.05015	2
Gata2	c1run1_11_X_nkx2.5.e8.5	0	1.05015	2
Gata3	c1run1_11_X_nkx2.5.e8.5	0	1.05015	2
Hand1	c1run1_11_X_nkx2.5.e8.5	0	1.05015	2
Msx1	c1run1_11_X_nkx2.5.e8.5	0.99796	1.05015	2
Nkx2-5	c1run1_14_X_nkx2.5.e8.5	6.82646	1.04732	NA
Ankrd1	c1run1_14_X_nkx2.5.e8.5	9.59404	1.04732	NA
Cdkn2d	c1run1_14_X_nkx2.5.e8.5	6.62517	1.04732	NA
Hopx	c1run1_14_X_nkx2.5.e8.5	8.40526	1.04732	NA
Mef2c	c1run1_14_X_nkx2.5.e8.5	8.22035	1.04732	NA
Myocd	c1run1_14_X_nkx2.5.e8.5	8.44091	1.04732	NA
Smyd1	c1run1_14_X_nkx2.5.e8.5	8.76882	1.04732	NA
Tbx20	c1run1_14_X_nkx2.5.e8.5	6.27359	1.04732	NA
Dnmt3b	c1run1_14_X_nkx2.5.e8.5	3.06868	1.04732	NA
Gata2	c1run1_14_X_nkx2.5.e8.5	0	1.04732	NA
Gata3	c1run1_14_X_nkx2.5.e8.5	0	1.04732	NA
Hand1	c1run1_14_X_nkx2.5.e8.5	0	1.04732	NA
Msx1	c1run1_14_X_nkx2.5.e8.5	0.864823	1.04732	NA
Nkx2-5	c1run1_16_X_nkx2.5.e8.5	5.40516	0.83918	2
Ankrd1	c1run1_16_X_nkx2.5.e8.5	11.1811	0.83918	2
Cdkn2d	c1run1_16_X_nkx2.5.e8.5	4.47046	0.83918	2
Hopx	c1run1_16_X_nkx2.5.e8.5	0	0.83918	2
Mef2c	c1run1_16_X_nkx2.5.e8.5	9.8164	0.83918	2
Myocd	c1run1_16_X_nkx2.5.e8.5	8.79005	0.83918	2
Smyd1	c1run1_16_X_nkx2.5.e8.5	5.72683	0.83918	2
Tbx20	c1run1_16_X_nkx2.5.e8.5	6.86377	0.83918	2
Dnmt3b	c1run1_16_X_nkx2.5.e8.5	5.43755	0.83918	2
Gata2	c1run1_16_X_nkx2.5.e8.5	0	0.83918	2
Gata3	c1run1_16_X_nkx2.5.e8.5	0	0.83918	2
Hand1	c1run1_16_X_nkx2.5.e8.5	6.76512	0.83918	2
Msx1	c1run1_16_X_nkx2.5.e8.5	0	0.83918	2
Nkx2-5	c1run1_17_X_nkx2.5.e8.5	7.24594	1.04404	2
Ankrd1	c1run1_17_X_nkx2.5.e8.5	12.2799	1.04404	2
Cdkn2d	c1run1_17_X_nkx2.5.e8.5	6.15913	1.04404	2
Hopx	c1run1_17_X_nkx2.5.e8.5	6.3648	1.04404	2
Mef2c	c1run1_17_X_nkx2.5.e8.5	9.25719	1.04404	2
Myocd	c1run1_17_X_nkx2.5.e8.5	10.7324	1.04404	2
Smyd1	c1run1_17_X_nkx2.5.e8.5	8.1794	1.04404	2
Tbx20	c1run1_17_X_nkx2.5.e8.5	8.26451	1.04404	2
Dnmt3b	c1run1_17_X_nkx2.5.e8.5	7.54162	1.04404	2
Gata2	c1run1_17_X_nkx2.5.e8.5	0	1.04404	2
Gata3	c1run1_17_X_nkx2.5.e8.5	0	1.04404	2
Hand1	c1run1_17_X_nkx2.5.e8.5	0	1.04404	2
Msx1	c1run1_17_X_nkx2.5.e8.5	0	1.04404	2
Nkx2-5	c1run1_18_X_nkx2.5.e8.5	5.37854	1.04896	2
Ankrd1	c1run1_18_X_nkx2.5.e8.5	13.3569	1.04896	2
Cdkn2d	c1run1_18_X_nkx2.5.e8.5	0	1.04896	2
Hopx	c1run1_18_X_nkx2.5.e8.5	6.48472	1.04896	2
Mef2c	c1run1_18_X_nkx2.5.e8.5	10.9466	1.04896	2
Myocd	c1run1_18_X_nkx2.5.e8.5	8.71961	1.04896	2
Smyd1	c1run1_18_X_nkx2.5.e8.5	10.3581	1.04896	2
Tbx20	c1run1_18_X_nkx2.5.e8.5	7.12573	1.04896	2
Dnmt3b	c1run1_18_X_nkx2.5.e8.5	5.20963	1.04896	2
Gata2	c1run1_18_X_nkx2.5.e8.5	0	1.04896	2
Gata3	c1run1_18_X_nkx2.5.e8.5	0	1.04896	2
Hand1	c1run1_18_X_nkx2.5.e8.5	4.71588	1.04896	2
Msx1	c1run1_18_X_nkx2.5.e8.5	0	1.04896	2
Nkx2-5	c1run1_19_X_nkx2.5.e8.5	5.83346	0.983111	2
Ankrd1	c1run1_19_X_nkx2.5.e8.5	11.8426	0.983111	2
Cdkn2d	c1run1_19_X_nkx2.5.e8.5	3.22823	0.983111	2
Hopx	c1run1_19_X_nkx2.5.e8.5	7.32397	0.983111	2
Mef2c	c1run1_19_X_nkx2.5.e8.5	10.4395	0.983111	2
Myocd	c1run1_19_X_nkx2.5.e8.5	11.3364	0.983111	2
Smyd1	c1run1_19_X_nkx2.5.e8.5	7.51247	0.983111	2
Tbx20	c1run1_19_X_nkx2.5.e8.5	7.1759	0.983111	2
Dnmt3b	c1run1_19_X_nkx2.5.e8.5	0	0.983111	2
Gata2	c1run1_19_X_nkx2.5.e8.5	0	0.983111	2
Gata3	c1run1_19_X_nkx2.5.e8.5	0	0.983111	2
Hand1	c1run1_19_X_nkx2.5.e8.5	1.19401	0.983111	2
Msx1	c1run1_19_X_nkx2.5.e8.5	0	0.983111	2
Nkx2-5	c1run1_20_X_nkx2.5.e8.5	5.33526	0.999813	2
Ankrd1	c1run1_20_X_nkx2.5.e8.5	11.0767	0.999813	2
Cdkn2d	c1run1_20_X_nkx2.5.e8.5	4.41158	0.999813	2
Hopx	c1run1_20_X_nkx2.5.e8.5	7.03405	0.999813	2
Mef2c	c1run1_20_X_nkx2.5.e8.5	9.40909	0.999813	2
Myocd	c1run1_20_X_nkx2.5.e8.5	9.66373	0.999813	2
Smyd1	c1run1_20_X_nkx2.5.e8.5	7.51995	0.999813	2
Tbx20	c1run1_20_X_nkx2.5.e8.5	6.8962	0.999813	2
Dnmt3b	c1run1_20_X_nkx2.5.e8.5	0	0.999813	2
Gata2	c1run1_20_X_nkx2.5.e8.5	0	0.999813	2
Gata3	c1run1_20_X_nkx2.5.e8.5	0	0.999813	2
Hand1	c1run1_20_X_nkx2.5.e8.5	9.02398	0.999813	2
Msx1	c1run1_20_X_nkx2.5.e8.5	0	0.999813	2
Nkx2-5	c1run1_22_X_nkx2.5.e8.5	4.32493	0.20101	1
Ankrd1	c1run1_22_X_nkx2.5.e8.5	2.22091	0.20101	1
Cdkn2d	c1run1_22_X_nkx2.5.e8.5	0	0.20101	1
Hopx	c1run1_22_X_nkx2.5.e8.5	0	0.20101	1
Mef2c	c1run1_22_X_nkx2.5.e8.5	1.67677	0.20101	1
Myocd	c1run1_22_X_nkx2.5.e8.5	5.68745	0.20101	1
Smyd1	c1run1_22_X_nkx2.5.e8.5	7.32125	0.20101	1
Tbx20	c1run1_22_X_nkx2.5.e8.5	8.26958	0.20101	1
Dnmt3b	c1run1_22_X_nkx2.5.e8.5	6.51719	0.20101	1
Gata2	c1run1_22_X_nkx2.5.e8.5	0	0.20101	1
Gata3	c1run1_22_X_nkx2.5.e8.5	7.11439	0.20101	1
Hand1	c1run1_22_X_nkx2.5.e8.5	8.86889	0.20101	1
Msx1	c1run1_22_X_nkx2.5.e8.5	5.23338	0.20101	1
Nkx2-5	c1run1_24_X_nkx2.5.e8.5	0	0.252812	1
Ankrd1	c1run1_24_X_nkx2.5.e8.5	4.31926	0.252812	1
Cdkn2d	c1run1_24_X_nkx2.5.e8.5	8.32205	0.252812	1
Hopx	c1run1_24_X_nkx2.5.e8.5	0	0.252812	1
Mef2c	c1run1_24_X_nkx2.5.e8.5	1.08098	0.252812	1
Myocd	c1run1_24_X_nkx2.5.e8.5	9.2995	0.252812	1
Smyd1	c1run1_24_X_nkx2.5.e8.5	4.61029	0.252812	1
Tbx20	c1run1_24_X_nkx2.5.e8.5	8.7347	0.252812	1
Dnmt3b	c1run1_24_X_nkx2.5.e8.5	4.4721	0.252812	1
Gata2	c1run1_24_X_nkx2.5.e8.5	4.73639	0.252812	1
Gata3	c1run1_24_X_nkx2.5.e8.5	9.00586	0.252812	1
Hand1	c1run1_24_X_nkx2.5.e8.5	7.29615	0.252812	1
Msx1	c1run1_24_X_nkx2.5.e8.5	8.85774	0.252812	1
Nkx2-5	c1run1_27_X_nkx2.5.e8.5	5.24777	0.965626	2
Ankrd1	c1run1_27_X_nkx2.5.e8.5	9.98331	0.965626	2
Cdkn2d	c1run1_27_X_nkx2.5.e8.5	7.8605	0.965626	2
Hopx	c1run1_27_X_nkx2.5.e8.5	6.50702	0.965626	2
Mef2c	c1run1_27_X_nkx2.5.e8.5	11.3294	0.965626	2
Myocd	c1run1_27_X_nkx2.5.e8.5	9.58178	0.965626	2
Smyd1	c1run1_27_X_nkx2.5.e8.5	9.10934	0.965626	2
Tbx20	c1run1_27_X_nkx2.5.e8.5	10.1436	0.965626	2
Dnmt3b	c1run1_27_X_nkx2.5.e8.5	5.35394	0.965626	2
Gata2	c1run1_27_X_nkx2.5.e8.5	0	0.965626	2
Gata3	c1run1_27_X_nkx2.5.e8.5	0	0.965626	2
Hand1	c1run1_27_X_nkx2.5.e8.5	0	0.965626	2
Msx1	c1run1_27_X_nkx2.5.e8.5	0	0.965626	2
Nkx2-5	c1run1_28_X_nkx2.5.e8.5	4.28417	1.04168	2
Ankrd1	c1run1_28_X_nkx2.5.e8.5	11.3129	1.04168	2
Cdkn2d	c1run1_28_X_nkx2.5.e8.5	6.89373	1.04168	2
Hopx	c1run1_28_X_nkx2.5.e8.5	6.6287	1.04168	2
Mef2c	c1run1_28_X_nkx2.5.e8.5	7.49263	1.04168	2
Myocd	c1run1_28_X_nkx2.5.e8.5	8.08342	1.04168	2
Smyd1	c1run1_28_X_nkx2.5.e8.5	9.37333	1.04168	2
Tbx20	c1run1_28_X_nkx2.5.e8.5	7.02661	1.04168	2
Dnmt3b	c1run1_28_X_nkx2.5.e8.5	0	1.04168	2
Gata2	c1run1_28_X_nkx2.5.e8.5	0	1.04168	2
Gata3	c1run1_28_X_nkx2.5.e8.5	0	1.04168	2
Hand1	c1run1_28_X_nkx2.5.e8.5	0	1.04168	2
Msx1	c1run1_28_X_nkx2.5.e8.5	0	1.04168	2
Nkx2-5	c1run1_29_X_nkx2.5.e8.5	6.58904	0.9894	2
Ankrd1	c1run1_29_X_nkx2.5.e8.5	13.0008	0.9894	2
Cdkn2d	c1run1_29_X_nkx2.5.e8.5	7.20245	0.9894	2
Hopx	c1run1_29_X_nkx2.5.e8.5	7.88208	0.9894	2
Mef2c	c1run1_29_X_nkx2.5.e8.5	9.0858	0.9894	2
Myocd	c1run1_29_X_nkx2.5.e8.5	12.2222	0.9894	2
Smyd1	c1run1_29_X_nkx2.5.e8.5	9.49118	0.9894	2
Tbx20	c1run1_29_X_nkx2.5.e8.5	11.2351	0.9894	2
Dnmt3b	c1run1_29_X_nkx2.5.e8.5	1.32212	0.9894	2
Gata2	c1run1_29_X_nkx2.5.e8.5	0	0.9894	2
Gata3	c1run1_29_X_nkx2.5.e8.5	0	0.9894	2
Hand1	c1run1_29_X_nkx2.5.e8.5	3.08775	0.9894	2
Msx1	c1run1_29_X_nkx2.5.e8.5	0	0.9894	2
Nkx2-5	c1run1_32_X_nkx2.5.e8.5	4.37512	0.617633	2
Ankrd1	c1run1_32_X_nkx2.5.e8.5	9.57047	0.617633	2
Cdkn2d	c1run1_32_X_nkx2.5.e8.5	6.60824	0.617633	2
Hopx	c1run1_32_X_nkx2.5.e8.5	8.1784	0.617633	2
Mef2c	c1run1_32_X_nkx2.5.e8.5	10.9801	0.617633	2
Myocd	c1run1_32_X_nkx2.5.e8.5	11.8434	0.617633	2
Smyd1	c1run1_32_X_nkx2.5.e8.5	10.7254	0.617633	2
Tbx20	c1run1_32_X_nkx2.5.e8.5	8.81663	0.617633	2
Dnmt3b	c1run1_32_X_nkx2.5.e8.5	9.08497	0.617633	2
Gata2	c1run1_32_X_nkx2.5.e8.5	0	0.617633	2
Gata3	c1run1_32_X_nkx2.5.e8.5	0	0.617633	2
Hand1	c1run1_32_X_nkx2.5.e8.5	1.67562	0.617633	2
Msx1	c1run1_32_X_nkx2.5.e8.5	0	0.617633	2
Nkx2-5	c1run1_33_X_nkx2.5.e8.5	4.00395	1.0245	2
Ankrd1	c1run1_33_X_nkx2.5.e8.5	9.04141	1.0245	2
Cdkn2d	c1run1_33_X_nkx2.5.e8.5	8.2106	1.0245	2
Hopx	c1run1_33_X_nkx2.5.e8.5	8.77528	1.0245	2
Mef2c	c1run1_33_X_nkx2.5.e8.5	8.29652	1.0245	2
Myocd	c1run1_33_X_nkx2.5.e8.5	7.47891	1.0245	2
Smyd1	c1run1_33_X_nkx2.5.e8.5	5.7953	1.0245	2
Tbx20	c1run1_33_X_nkx2.5.e8.5	6.66238	1.0245	2
Dnmt3b	c1run1_33_X_nkx2.5.e8.5	0.702061	1.0245	2
Gata2	c1run1_33_X_nkx2.5.e8.5	0	1.0245	2
Gata3	c1run1_33_X_nkx2.5.e8.5	0	1.0245	2
Hand1	c1run1_33_X_nkx2.5.e8.5	0	1.0245	2
Msx1	c1run1_33_X_nkx2.5.e8.5	0	1.0245	2
Nkx2-5	c1run1_34_X_nkx2.5.e8.5	6.22238	1.01248	2
Ankrd1	c1run1_34_X_nkx2.5.e8.5	12.5785	1.01248	2
Cdkn2d	c1run1_34_X_nkx2.5.e8.5	7.87961	1.01248	2
Hopx	c1run1_34_X_nkx2.5.e8.5	8.17142	1.01248	2
Mef2c	c1run1_34_X_nkx2.5.e8.5	9.2203	1.01248	2
Myocd	c1run1_34_X_nkx2.5.e8.5	10.0473	1.01248	2
Smyd1	c1run1_34_X_nkx2.5.e8.5	3.26219	1.01248	2
Tbx20	c1run1_34_X_nkx2.5.e8.5	9.93776	1.01248	2
Dnmt3b	c1run1_34_X_nkx2.5.e8.5	6.09861	1.01248	2
Gata2	c1run1_34_X_nkx2.5.e8.5	0	1.01248	2
Gata3	c1run1_34_X_nkx2.5.e8.5	0	1.01248	2
Hand1	c1run1_34_X_nkx2.5.e8.5	0	1.01248	2
Msx1	c1run1_34_X_nkx2.5.e8.5	0	1.01248	2
Nkx2-5	c1run1_37_X_nkx2.5.e8.5	4.55463	1.00244	2
Ankrd1	c1run1_37_X_nkx2.5.e8.5	13.0497	1.00244	2
Cdkn2d	c1run1_37_X_nkx2.5.e8.5	8.28987	1.00244	2
Hopx	c1run1_37_X_nkx2.5.e8.5	1.49793	1.00244	2
Mef2c	c1run1_37_X_nkx2.5.e8.5	10.7524	1.00244	2
Myocd	c1run1_37_X_nkx2.5.e8.5	10.2602	1.00244	2
Smyd1	c1run1_37_X_nkx2.5.e8.5	10.1595	1.00244	2
Tbx20	c1run1_37_X_nkx2.5.e8.5	10.7106	1.00244	2
Dnmt3b	c1run1_37_X_nkx2.5.e8.5	8.03614	1.00244	2
Gata2	c1run1_37_X_nkx2.5.e8.5	0	1.00244	2
Gata3	c1run1_37_X_nkx2.5.e8.5	3.25001	1.00244	2
Hand1	c1run1_37_X_nkx2.5.e8.5	9.68187	1.00244	2
Msx1	c1run1_37_X_nkx2.5.e8.5	0	1.00244	2
Nkx2-5	c1run1_38_X_nkx2.5.e8.5	4.2926	0.201597	1
Ankrd1	c1run1_38_X_nkx2.5.e8.5	4.39425	0.201597	1
Cdkn2d	c1run1_38_X_nkx2.5.e8.5	4.18325	0.201597	1
Hopx	c1run1_38_X_nkx2.5.e8.5	0	0.201597	1
Mef2c	c1run1_38_X_nkx2.5.e8.5	0	0.201597	1
Myocd	c1run1_38_X_nkx2.5.e8.5	0	0.201597	1
Smyd1	c1run1_38_X_nkx2.5.e8.5	0	0.201597	1
Tbx20	c1run1_38_X_nkx2.5.e8.5	1.2813	0.201597	1
Dnmt3b	c1run1_38_X_nkx2.5.e8.5	7.40777	0.201597	1
Gata2	c1run1_38_X_nkx2.5.e8.5	4.18325	0.201597	1
Gata3	c1run1_38_X_nkx2.5.e8.5	6.20867	0.201597	1
Hand1	c1run1_38_X_nkx2.5.e8.5	9.79202	0.201597	1
Msx1	c1run1_38_X_nkx2.5.e8.5	9.73262	0.201597	1
Nkx2-5	c1run1_39_X_nkx2.5.e8.5	8.14947	0.991556	2
Ankrd1	c1run1_39_X_nkx2.5.e8.5	13.3679	0.991556	2
Cdkn2d	c1run1_39_X_nkx2.5.e8.5	8.49335	0.991556	2
Hopx	c1run1_39_X_nkx2.5.e8.5	5.20065	0.991556	2
Mef2c	c1run1_39_X_nkx2.5.e8.5	9.37132	0.991556	2
Myocd	c1run1_39_X_nkx2.5.e8.5	10.0389	0.991556	2
Smyd1	c1run1_39_X_nkx2.5.e8.5	7.82675	0.991556	2
Tbx20	c1run1_39_X_nkx2.5.e8.5	10.9876	0.991556	2
Dnmt3b	c1run1_39_X_nkx2.5.e8.5	6.92926	0.991556	2
Gata2	c1run1_39_X_nkx2.5.e8.5	0	0.991556	2
Gata3	c1run1_39_X_nkx2.5.e8.5	0	0.991556	2
Hand1	c1run1_39_X_nkx2.5.e8.5	1.39294	0.991556	2
Msx1	c1run1_39_X_nkx2.5.e8.5	0	0.991556	2
Nkx2-5	c1run1_40_X_nkx2.5.e8.5	2.89521	0.259179	NA
Ankrd1	c1run1_40_X_nkx2.5.e8.5	0.77863	0.259179	NA
Cdkn2d	c1run1_40_X_nkx2.5.e8.5	1.28155	0.259179	NA
Hopx	c1run1_40_X_nkx2.5.e8.5	0	0.259179	NA
Mef2c	c1run1_40_X_nkx2.5.e8.5	9.52601	0.259179	NA
Myocd	c1run1_40_X_nkx2.5.e8.5	6.12284	0.259179	NA
Smyd1	c1run1_40_X_nkx2.5.e8.5	0	0.259179	NA
Tbx20	c1run1_40_X_nkx2.5.e8.5	0	0.259179	NA
Dnmt3b	c1run1_40_X_nkx2.5.e8.5	8.39783	0.259179	NA
Gata2	c1run1_40_X_nkx2.5.e8.5	0	0.259179	NA
Gata3	c1run1_40_X_nkx2.5.e8.5	0	0.259179	NA
Hand1	c1run1_40_X_nkx2.5.e8.5	1.28155	0.259179	NA
Msx1	c1run1_40_X_nkx2.5.e8.5	0	0.259179	NA
Nkx2-5	c1run1_42_X_nkx2.5.e8.5	2.53032	0.206689	1
Ankrd1	c1run1_42_X_nkx2.5.e8.5	0	0.206689	1
Cdkn2d	c1run1_42_X_nkx2.5.e8.5	4.14727	0.206689	1
Hopx	c1run1_42_X_nkx2.5.e8.5	0	0.206689	1
Mef2c	c1run1_42_X_nkx2.5.e8.5	3.69405	0.206689	1
Myocd	c1run1_42_X_nkx2.5.e8.5	0	0.206689	1
Smyd1	c1run1_42_X_nkx2.5.e8.5	0	0.206689	1
Tbx20	c1run1_42_X_nkx2.5.e8.5	8.12547	0.206689	1
Dnmt3b	c1run1_42_X_nkx2.5.e8.5	1.99481	0.206689	1
Gata2	c1run1_42_X_nkx2.5.e8.5	0	0.206689	1
Gata3	c1run1_42_X_nkx2.5.e8.5	5.89526	0.206689	1
Hand1	c1run1_42_X_nkx2.5.e8.5	10.8158	0.206689	1
Msx1	c1run1_42_X_nkx2.5.e8.5	6.27486	0.206689	1
Nkx2-5	c1run1_45_X_nkx2.5.e8.5	1.75636	0.204855	1
Ankrd1	c1run1_45_X_nkx2.5.e8.5	0	0.204855	1
Cdkn2d	c1run1_45_X_nkx2.5.e8.5	8.23496	0.204855	1
Hopx	c1run1_45_X_nkx2.5.e8.5	0	0.204855	1
Mef2c	c1run1_45_X_nkx2.5.e8.5	0	0.204855	1
Myocd	c1run1_45_X_nkx2.5.e8.5	0	0.204855	1
Smyd1	c1run1_45_X_nkx2.5.e8.5	0	0.204855	1
Tbx20	c1run1_45_X_nkx2.5.e8.5	9.05041	0.204855	1
Dnmt3b	c1run1_45_X_nkx2.5.e8.5	7.92486	0.204855	1
Gata2	c1run1_45_X_nkx2.5.e8.5	6.94129	0.204855	1
Gata3	c1run1_45_X_nkx2.5.e8.5	7.32514	0.204855	1
Hand1	c1run1_45_X_nkx2.5.e8.5	10.3044	0.204855	1
Msx1	c1run1_45_X_nkx2.5.e8.5	8.29355	0.204855	1
Nkx2-5	c1run1_47_X_nkx2.5.e8.5	0.668651	0.293998	3
Ankrd1	c1run1_47_X_nkx2.5.e8.5	8.46586	0.293998	3
Cdkn2d	c1run1_47_X_nkx2.5.e8.5	1.46924	0.293998	3
Hopx	c1run1_47_X_nkx2.5.e8.5	0	0.293998	3
Mef2c	c1run1_47_X_nkx2.5.e8.5	8.48972	0.293998	3
Myocd	c1run1_47_X_nkx2.5.e8.5	1.12378	0.293998	3
Smyd1	c1run1_47_X_nkx2.5.e8.5	5.33993	0.293998	3
Tbx20	c1run1_47_X_nkx2.5.e8.5	10.1194	0.293998	3
Dnmt3b	c1run1_47_X_nkx2.5.e8.5	8.35333	0.293998	3
Gata2	c1run1_47_X_nkx2.5.e8.5	0	0.293998	3
Gata3	c1run1_47_X_nkx2.5.e8.5	0	0.293998	3
Hand1	c1run1_47_X_nkx2.5.e8.5	6.65306	0.293998	3
Msx1	c1run1_47_X_nkx2.5.e8.5	1.12378	0.293998	3
Nkx2-5	c1run1_50_X_nkx2.5.e8.5	6.09472	0.92053	2
Ankrd1	c1run1_50_X_nkx2.5.e8.5	13.0045	0.92053	2
Cdkn2d	c1run1_50_X_nkx2.5.e8.5	3.48587	0.92053	2
Hopx	c1run1_50_X_nkx2.5.e8.5	5.47895	0.92053	2
Mef2c	c1run1_50_X_nkx2.5.e8.5	8.86188	0.92053	2
Myocd	c1run1_50_X_nkx2.5.e8.5	8.41267	0.92053	2
Smyd1	c1run1_50_X_nkx2.5.e8.5	5.93547	0.92053	2
Tbx20	c1run1_50_X_nkx2.5.e8.5	9.05691	0.92053	2
Dnmt3b	c1run1_50_X_nkx2.5.e8.5	1.0146	0.92053	2
Gata2	c1run1_50_X_nkx2.5.e8.5	0	0.92053	2
Gata3	c1run1_50_X_nkx2.5.e8.5	0	0.92053	2
Hand1	c1run1_50_X_nkx2.5.e8.5	5.52027	0.92053	2
Msx1	c1run1_50_X_nkx2.5.e8.5	0	0.92053	2
Nkx2-5	c1run1_51_X_nkx2.5.e8.5	5.72148	0.729241	2
Ankrd1	c1run1_51_X_nkx2.5.e8.5	11.17	0.729241	2
Cdkn2d	c1run1_51_X_nkx2.5.e8.5	6.869	0.729241	2
Hopx	c1run1_51_X_nkx2.5.e8.5	0	0.729241	2
Mef2c	c1run1_51_X_nkx2.5.e8.5	11.6523	0.729241	2
Myocd	c1run1_51_X_nkx2.5.e8.5	11.4195	0.729241	2
Smyd1	c1run1_51_X_nkx2.5.e8.5	5.99051	0.729241	2
Tbx20	c1run1_51_X_nkx2.5.e8.5	7.21496	0.729241	2
Dnmt3b	c1run1_51_X_nkx2.5.e8.5	0	0.729241	2
Gata2	c1run1_51_X_nkx2.5.e8.5	0	0.729241	2
Gata3	c1run1_51_X_nkx2.5.e8.5	0	0.729241	2
Hand1	c1run1_51_X_nkx2.5.e8.5	5.86226	0.729241	2
Msx1	c1run1_51_X_nkx2.5.e8.5	0	0.729241	2
Nkx2-5	c1run1_52_X_nkx2.5.e8.5	7.50006	0.921209	2
Ankrd1	c1run1_52_X_nkx2.5.e8.5	12.4451	0.921209	2
Cdkn2d	c1run1_52_X_nkx2.5.e8.5	6.18634	0.921209	2
Hopx	c1run1_52_X_nkx2.5.e8.5	7.72661	0.921209	2
Mef2c	c1run1_52_X_nkx2.5.e8.5	8.63117	0.921209	2
Myocd	c1run1_52_X_nkx2.5.e8.5	8.98195	0.921209	2
Smyd1	c1run1_52_X_nkx2.5.e8.5	9.65127	0.921209	2
Tbx20	c1run1_52_X_nkx2.5.e8.5	10.9509	0.921209	2
Dnmt3b	c1run1_52_X_nkx2.5.e8.5	2.91254	0.921209	2
Gata2	c1run1_52_X_nkx2.5.e8.5	0	0.921209	2
Gata3	c1run1_52_X_nkx2.5.e8.5	0	0.921209	2
Hand1	c1run1_52_X_nkx2.5.e8.5	0.950676	0.921209	2
Msx1	c1run1_52_X_nkx2.5.e8.5	0	0.921209	2
Nkx2-5	c1run1_53_X_nkx2.5.e8.5	6.18991	0.972411	2
Ankrd1	c1run1_53_X_nkx2.5.e8.5	9.95536	0.972411	2
Cdkn2d	c1run1_53_X_nkx2.5.e8.5	5.49606	0.972411	2
Hopx	c1run1_53_X_nkx2.5.e8.5	4.10928	0.972411	2
Mef2c	c1run1_53_X_nkx2.5.e8.5	9.13128	0.972411	2
Myocd	c1run1_53_X_nkx2.5.e8.5	9.94009	0.972411	2
Smyd1	c1run1_53_X_nkx2.5.e8.5	10.5421	0.972411	2
Tbx20	c1run1_53_X_nkx2.5.e8.5	7.39434	0.972411	2
Dnmt3b	c1run1_53_X_nkx2.5.e8.5	5.96698	0.972411	2
Gata2	c1run1_53_X_nkx2.5.e8.5	0	0.972411	2
Gata3	c1run1_53_X_nkx2.5.e8.5	0	0.972411	2
Hand1	c1run1_53_X_nkx2.5.e8.5	0	0.972411	2
Msx1	c1run1_53_X_nkx2.5.e8.5	0	0.972411	2
Nkx2-5	c1run1_54_X_nkx2.5.e8.5	1.32312	0.2413	1
Ankrd1	c1run1_54_X_nkx2.5.e8.5	1.80878	0.2413	1
Cdkn2d	c1run1_54_X_nkx2.5.e8.5	0	0.2413	1
Hopx	c1run1_54_X_nkx2.5.e8.5	0	0.2413	1
Mef2c	c1run1_54_X_nkx2.5.e8.5	1.00099	0.2413	1
Myocd	c1run1_54_X_nkx2.5.e8.5	0	0.2413	1
Smyd1	c1run1_54_X_nkx2.5.e8.5	0	0.2413	1
Tbx20	c1run1_54_X_nkx2.5.e8.5	2.00149	0.2413	1
Dnmt3b	c1run1_54_X_nkx2.5.e8.5	5.15168	0.2413	1
Gata2	c1run1_54_X_nkx2.5.e8.5	2.00149	0.2413	1
Gata3	c1run1_54_X_nkx2.5.e8.5	6.38567	0.2413	1
Hand1	c1run1_54_X_nkx2.5.e8.5	0	0.2413	1
Msx1	c1run1_54_X_nkx2.5.e8.5	8.70242	0.2413	1
Nkx2-5	c1run1_55_X_nkx2.5.e8.5	5.1457	0.2357	3
Ankrd1	c1run1_55_X_nkx2.5.e8.5	1.7896	0.2357	3
Cdkn2d	c1run1_55_X_nkx2.5.e8.5	0	0.2357	3
Hopx	c1run1_55_X_nkx2.5.e8.5	1.50736	0.2357	3
Mef2c	c1run1_55_X_nkx2.5.e8.5	0.690906	0.2357	3
Myocd	c1run1_55_X_nkx2.5.e8.5	0	0.2357	3
Smyd1	c1run1_55_X_nkx2.5.e8.5	0	0.2357	3
Tbx20	c1run1_55_X_nkx2.5.e8.5	1.7896	0.2357	3
Dnmt3b	c1run1_55_X_nkx2.5.e8.5	4.71073	0.2357	3
Gata2	c1run1_55_X_nkx2.5.e8.5	0	0.2357	3
Gata3	c1run1_55_X_nkx2.5.e8.5	6.92365	0.2357	3
Hand1	c1run1_55_X_nkx2.5.e8.5	0	0.2357	3
Msx1	c1run1_55_X_nkx2.5.e8.5	0	0.2357	3
Nkx2-5	c1run1_57_X_nkx2.5.e8.5	6.25453	1.03016	2
Ankrd1	c1run1_57_X_nkx2.5.e8.5	12.2791	1.03016	2
Cdkn2d	c1run1_57_X_nkx2.5.e8.5	8.72501	1.03016	2
Hopx	c1run1_57_X_nkx2.5.e8.5	8.10201	1.03016	2
Mef2c	c1run1_57_X_nkx2.5.e8.5	11.1933	1.03016	2
Myocd	c1run1_57_X_nkx2.5.e8.5	9.60122	1.03016	2
Smyd1	c1run1_57_X_nkx2.5.e8.5	8.42599	1.03016	2
Tbx20	c1run1_57_X_nkx2.5.e8.5	10.1138	1.03016	2
Dnmt3b	c1run1_57_X_nkx2.5.e8.5	0	1.03016	2
Gata2	c1run1_57_X_nkx2.5.e8.5	0	1.03016	2
Gata3	c1run1_57_X_nkx2.5.e8.5	0	1.03016	2
Hand1	c1run1_57_X_nkx2.5.e8.5	8.6472	1.03016	2
Msx1	c1run1_57_X_nkx2.5.e8.5	0	1.03016	2
Nkx2-5	c1run1_58_X_nkx2.5.e8.5	3.1678	0.246399	3
Ankrd1	c1run1_58_X_nkx2.5.e8.5	3.1678	0.246399	3
Cdkn2d	c1run1_58_X_nkx2.5.e8.5	2.53407	0.246399	3
Hopx	c1run1_58_X_nkx2.5.e8.5	0	0.246399	3
Mef2c	c1run1_58_X_nkx2.5.e8.5	8.86612	0.246399	3
Myocd	c1run1_58_X_nkx2.5.e8.5	0	0.246399	3
Smyd1	c1run1_58_X_nkx2.5.e8.5	0	0.246399	3
Tbx20	c1run1_58_X_nkx2.5.e8.5	1.76384	0.246399	3
Dnmt3b	c1run1_58_X_nkx2.5.e8.5	0	0.246399	3
Gata2	c1run1_58_X_nkx2.5.e8.5	0	0.246399	3
Gata3	c1run1_58_X_nkx2.5.e8.5	0	0.246399	3
Hand1	c1run1_58_X_nkx2.5.e8.5	0	0.246399	3
Msx1	c1run1_58_X_nkx2.5.e8.5	0	0.246399	3
Nkx2-5	c1run1_59_X_nkx2.5.e8.5	5.7485	1.01425	2
Ankrd1	c1run1_59_X_nkx2.5.e8.5	11.5331	1.01425	2
Cdkn2d	c1run1_59_X_nkx2.5.e8.5	6.99343	1.01425	2
Hopx	c1run1_59_X_nkx2.5.e8.5	6.44996	1.01425	2
Mef2c	c1run1_59_X_nkx2.5.e8.5	10.0137	1.01425	2
Myocd	c1run1_59_X_nkx2.5.e8.5	11.643	1.01425	2
Smyd1	c1run1_59_X_nkx2.5.e8.5	9.22422	1.01425	2
Tbx20	c1run1_59_X_nkx2.5.e8.5	9.49878	1.01425	2
Dnmt3b	c1run1_59_X_nkx2.5.e8.5	7.49747	1.01425	2
Gata2	c1run1_59_X_nkx2.5.e8.5	0	1.01425	2
Gata3	c1run1_59_X_nkx2.5.e8.5	0	1.01425	2
Hand1	c1run1_59_X_nkx2.5.e8.5	0	1.01425	2
Msx1	c1run1_59_X_nkx2.5.e8.5	0	1.01425	2
Nkx2-5	c1run1_60_X_nkx2.5.e8.5	4.22074	0.240177	1
Ankrd1	c1run1_60_X_nkx2.5.e8.5	1.53135	0.240177	1
Cdkn2d	c1run1_60_X_nkx2.5.e8.5	0	0.240177	1
Hopx	c1run1_60_X_nkx2.5.e8.5	0	0.240177	1
Mef2c	c1run1_60_X_nkx2.5.e8.5	8.60201	0.240177	1
Myocd	c1run1_60_X_nkx2.5.e8.5	0	0.240177	1
Smyd1	c1run1_60_X_nkx2.5.e8.5	7.5987	0.240177	1
Tbx20	c1run1_60_X_nkx2.5.e8.5	0	0.240177	1
Dnmt3b	c1run1_60_X_nkx2.5.e8.5	10.0834	0.240177	1
Gata2	c1run1_60_X_nkx2.5.e8.5	0	0.240177	1
Gata3	c1run1_60_X_nkx2.5.e8.5	7.14498	0.240177	1
Hand1	c1run1_60_X_nkx2.5.e8.5	0	0.240177	1
Msx1	c1run1_60_X_nkx2.5.e8.5	6.19911	0.240177	1
Nkx2-5	c1run1_61_X_nkx2.5.e8.5	6.91112	0.482797	2
Ankrd1	c1run1_61_X_nkx2.5.e8.5	5.50667	0.482797	2
Cdkn2d	c1run1_61_X_nkx2.5.e8.5	10.3914	0.482797	2
Hopx	c1run1_61_X_nkx2.5.e8.5	0	0.482797	2
Mef2c	c1run1_61_X_nkx2.5.e8.5	10.6231	0.482797	2
Myocd	c1run1_61_X_nkx2.5.e8.5	10.6059	0.482797	2
Smyd1	c1run1_61_X_nkx2.5.e8.5	7.77243	0.482797	2
Tbx20	c1run1_61_X_nkx2.5.e8.5	9.21493	0.482797	2
Dnmt3b	c1run1_61_X_nkx2.5.e8.5	2.77623	0.482797	2
Gata2	c1run1_61_X_nkx2.5.e8.5	1.11778	0.482797	2
Gata3	c1run1_61_X_nkx2.5.e8.5	3.37309	0.482797	2
Hand1	c1run1_61_X_nkx2.5.e8.5	0	0.482797	2
Msx1	c1run1_61_X_nkx2.5.e8.5	0	0.482797	2
Nkx2-5	c1run1_63_X_nkx2.5.e8.5	0	0.757043	2
Ankrd1	c1run1_63_X_nkx2.5.e8.5	10.3312	0.757043	2
Cdkn2d	c1run1_63_X_nkx2.5.e8.5	7.90182	0.757043	2
Hopx	c1run1_63_X_nkx2.5.e8.5	0	0.757043	2
Mef2c	c1run1_63_X_nkx2.5.e8.5	8.44164	0.757043	2
Myocd	c1run1_63_X_nkx2.5.e8.5	9.21648	0.757043	2
Smyd1	c1run1_63_X_nkx2.5.e8.5	6.07302	0.757043	2
Tbx20	c1run1_63_X_nkx2.5.e8.5	10.1051	0.757043	2
Dnmt3b	c1run1_63_X_nkx2.5.e8.5	0	0.757043	2
Gata2	c1run1_63_X_nkx2.5.e8.5	0	0.757043	2
Gata3	c1run1_63_X_nkx2.5.e8.5	0	0.757043	2
Hand1	c1run1_63_X_nkx2.5.e8.5	6.25487	0.757043	2
Msx1	c1run1_63_X_nkx2.5.e8.5	0	0.757043	2
Nkx2-5	c1run1_64_X_nkx2.5.e8.5	6.9921	1.00577	2
Ankrd1	c1run1_64_X_nkx2.5.e8.5	11.5788	1.00577	2
Cdkn2d	c1run1_64_X_nkx2.5.e8.5	0	1.00577	2
Hopx	c1run1_64_X_nkx2.5.e8.5	6.62253	1.00577	2
Mef2c	c1run1_64_X_nkx2.5.e8.5	9.86871	1.00577	2
Myocd	c1run1_64_X_nkx2.5.e8.5	9.05002	1.00577	2
Smyd1	c1run1_64_X_nkx2.5.e8.5	3.91011	1.00577	2
Tbx20	c1run1_64_X_nkx2.5.e8.5	5.81845	1.00577	2
Dnmt3b	c1run1_64_X_nkx2.5.e8.5	0	1.00577	2
Gata2	c1run1_64_X_nkx2.5.e8.5	0	1.00577	2
Gata3	c1run1_64_X_nkx2.5.e8.5	0	1.00577	2
Hand1	c1run1_64_X_nkx2.5.e8.5	0	1.00577	2
Msx1	c1run1_64_X_nkx2.5.e8.5	0	1.00577	2
Nkx2-5	c1run1_65_X_nkx2.5.e8.5	5.3952	1.05282	2
Ankrd1	c1run1_65_X_nkx2.5.e8.5	12.1042	1.05282	2
Cdkn2d	c1run1_65_X_nkx2.5.e8.5	5.75738	1.05282	2
Hopx	c1run1_65_X_nkx2.5.e8.5	3.55398	1.05282	2
Mef2c	c1run1_65_X_nkx2.5.e8.5	10.5805	1.05282	2
Myocd	c1run1_65_X_nkx2.5.e8.5	11.2568	1.05282	2
Smyd1	c1run1_65_X_nkx2.5.e8.5	9.67752	1.05282	2
Tbx20	c1run1_65_X_nkx2.5.e8.5	10.5552	1.05282	2
Dnmt3b	c1run1_65_X_nkx2.5.e8.5	0	1.05282	2
Gata2	c1run1_65_X_nkx2.5.e8.5	0	1.05282	2
Gata3	c1run1_65_X_nkx2.5.e8.5	3.55398	1.05282	2
Hand1	c1run1_65_X_nkx2.5.e8.5	0	1.05282	2
Msx1	c1run1_65_X_nkx2.5.e8.5	0	1.05282	2
Nkx2-5	c1run1_66_X_nkx2.5.e8.5	3.5989	0.911071	2
Ankrd1	c1run1_66_X_nkx2.5.e8.5	13.0981	0.911071	2
Cdkn2d	c1run1_66_X_nkx2.5.e8.5	6.80151	0.911071	2
Hopx	c1run1_66_X_nkx2.5.e8.5	0	0.911071	2
Mef2c	c1run1_66_X_nkx2.5.e8.5	9.08379	0.911071	2
Myocd	c1run1_66_X_nkx2.5.e8.5	6.49076	0.911071	2
Smyd1	c1run1_66_X_nkx2.5.e8.5	6.9815	0.911071	2
Tbx20	c1run1_66_X_nkx2.5.e8.5	9.61715	0.911071	2
Dnmt3b	c1run1_66_X_nkx2.5.e8.5	7.91432	0.911071	2
Gata2	c1run1_66_X_nkx2.5.e8.5	0	0.911071	2
Gata3	c1run1_66_X_nkx2.5.e8.5	0	0.911071	2
Hand1	c1run1_66_X_nkx2.5.e8.5	0	0.911071	2
Msx1	c1run1_66_X_nkx2.5.e8.5	0	0.911071	2
Nkx2-5	c1run1_67_X_nkx2.5.e8.5	2.32195	1.01085	2
Ankrd1	c1run1_67_X_nkx2.5.e8.5	10.5191	1.01085	2
Cdkn2d	c1run1_67_X_nkx2.5.e8.5	7.43466	1.01085	2
Hopx	c1run1_67_X_nkx2.5.e8.5	8.26865	1.01085	2
Mef2c	c1run1_67_X_nkx2.5.e8.5	6.33988	1.01085	2
Myocd	c1run1_67_X_nkx2.5.e8.5	10.6584	1.01085	2
Smyd1	c1run1_67_X_nkx2.5.e8.5	8.41366	1.01085	2
Tbx20	c1run1_67_X_nkx2.5.e8.5	5.77086	1.01085	2
Dnmt3b	c1run1_67_X_nkx2.5.e8.5	0	1.01085	2
Gata2	c1run1_67_X_nkx2.5.e8.5	0	1.01085	2
Gata3	c1run1_67_X_nkx2.5.e8.5	1.37853	1.01085	2
Hand1	c1run1_67_X_nkx2.5.e8.5	0	1.01085	2
Msx1	c1run1_67_X_nkx2.5.e8.5	0	1.01085	2
Nkx2-5	c1run1_68_X_nkx2.5.e8.5	3.13951	0.554497	NA
Ankrd1	c1run1_68_X_nkx2.5.e8.5	9.09559	0.554497	NA
Cdkn2d	c1run1_68_X_nkx2.5.e8.5	7.25321	0.554497	NA
Hopx	c1run1_68_X_nkx2.5.e8.5	4.51565	0.554497	NA
Mef2c	c1run1_68_X_nkx2.5.e8.5	10.6898	0.554497	NA
Myocd	c1run1_68_X_nkx2.5.e8.5	11.3435	0.554497	NA
Smyd1	c1run1_68_X_nkx2.5.e8.5	7.427	0.554497	NA
Tbx20	c1run1_68_X_nkx2.5.e8.5	6.34812	0.554497	NA
Dnmt3b	c1run1_68_X_nkx2.5.e8.5	5.48377	0.554497	NA
Gata2	c1run1_68_X_nkx2.5.e8.5	0.832868	0.554497	NA
Gata3	c1run1_68_X_nkx2.5.e8.5	2.29458	0.554497	NA
Hand1	c1run1_68_X_nkx2.5.e8.5	0	0.554497	NA
Msx1	c1run1_68_X_nkx2.5.e8.5	3.37499	0.554497	NA
Nkx2-5	c1run1_69_X_nkx2.5.e8.5	8.34345	0.947873	2
Ankrd1	c1run1_69_X_nkx2.5.e8.5	9.00922	0.947873	2
Cdkn2d	c1run1_69_X_nkx2.5.e8.5	0	0.947873	2
Hopx	c1run1_69_X_nkx2.5.e8.5	7.70143	0.947873	2
Mef2c	c1run1_69_X_nkx2.5.e8.5	6.90746	0.947873	2
Myocd	c1run1_69_X_nkx2.5.e8.5	10.7077	0.947873	2
Smyd1	c1run1_69_X_nkx2.5.e8.5	3.02553	0.947873	2
Tbx20	c1run1_69_X_nkx2.5.e8.5	5.37421	0.947873	2
Dnmt3b	c1run1_69_X_nkx2.5.e8.5	0	0.947873	2
Gata2	c1run1_69_X_nkx2.5.e8.5	0	0.947873	2
Gata3	c1run1_69_X_nkx2.5.e8.5	0	0.947873	2
Hand1	c1run1_69_X_nkx2.5.e8.5	0	0.947873	2
Msx1	c1run1_69_X_nkx2.5.e8.5	0	0.947873	2
Nkx2-5	c1run1_70_X_nkx2.5.e8.5	4.03297	1.03402	2
Ankrd1	c1run1_70_X_nkx2.5.e8.5	11.7842	1.03402	2
Cdkn2d	c1run1_70_X_nkx2.5.e8.5	6.25385	1.03402	2
Hopx	c1run1_70_X_nkx2.5.e8.5	5.89252	1.03402	2
Mef2c	c1run1_70_X_nkx2.5.e8.5	10.581	1.03402	2
Myocd	c1run1_70_X_nkx2.5.e8.5	10.3398	1.03402	2
Smyd1	c1run1_70_X_nkx2.5.e8.5	7.4549	1.03402	2
Tbx20	c1run1_70_X_nkx2.5.e8.5	7.20733	1.03402	2
Dnmt3b	c1run1_70_X_nkx2.5.e8.5	0	1.03402	2
Gata2	c1run1_70_X_nkx2.5.e8.5	0	1.03402	2
Gata3	c1run1_70_X_nkx2.5.e8.5	0	1.03402	2
Hand1	c1run1_70_X_nkx2.5.e8.5	0	1.03402	2
Msx1	c1run1_70_X_nkx2.5.e8.5	0	1.03402	2
Nkx2-5	c1run1_71_X_nkx2.5.e8.5	3.40492	0.856937	2
Ankrd1	c1run1_71_X_nkx2.5.e8.5	12.8322	0.856937	2
Cdkn2d	c1run1_71_X_nkx2.5.e8.5	0.847471	0.856937	2
Hopx	c1run1_71_X_nkx2.5.e8.5	4.96233	0.856937	2
Mef2c	c1run1_71_X_nkx2.5.e8.5	10.7187	0.856937	2
Myocd	c1run1_71_X_nkx2.5.e8.5	11.535	0.856937	2
Smyd1	c1run1_71_X_nkx2.5.e8.5	5.92957	0.856937	2
Tbx20	c1run1_71_X_nkx2.5.e8.5	9.74062	0.856937	2
Dnmt3b	c1run1_71_X_nkx2.5.e8.5	0	0.856937	2
Gata2	c1run1_71_X_nkx2.5.e8.5	0	0.856937	2
Gata3	c1run1_71_X_nkx2.5.e8.5	0	0.856937	2
Hand1	c1run1_71_X_nkx2.5.e8.5	0	0.856937	2
Msx1	c1run1_71_X_nkx2.5.e8.5	0	0.856937	2
Nkx2-5	c1run1_73_X_nkx2.5.e8.5	4.30651	1.05083	2
Ankrd1	c1run1_73_X_nkx2.5.e8.5	12.0626	1.05083	2
Cdkn2d	c1run1_73_X_nkx2.5.e8.5	9.66279	1.05083	2
Hopx	c1run1_73_X_nkx2.5.e8.5	6.09727	1.05083	2
Mef2c	c1run1_73_X_nkx2.5.e8.5	8.45586	1.05083	2
Myocd	c1run1_73_X_nkx2.5.e8.5	9.68989	1.05083	2
Smyd1	c1run1_73_X_nkx2.5.e8.5	8.49395	1.05083	2
Tbx20	c1run1_73_X_nkx2.5.e8.5	8.23649	1.05083	2
Dnmt3b	c1run1_73_X_nkx2.5.e8.5	0	1.05083	2
Gata2	c1run1_73_X_nkx2.5.e8.5	0	1.05083	2
Gata3	c1run1_73_X_nkx2.5.e8.5	0	1.05083	2
Hand1	c1run1_73_X_nkx2.5.e8.5	0	1.05083	2
Msx1	c1run1_73_X_nkx2.5.e8.5	0	1.05083	2
Nkx2-5	c1run1_74_X_nkx2.5.e8.5	4.31158	0.203357	1
Ankrd1	c1run1_74_X_nkx2.5.e8.5	8.43559	0.203357	1
Cdkn2d	c1run1_74_X_nkx2.5.e8.5	2.766	0.203357	1
Hopx	c1run1_74_X_nkx2.5.e8.5	0	0.203357	1
Mef2c	c1run1_74_X_nkx2.5.e8.5	0	0.203357	1
Myocd	c1run1_74_X_nkx2.5.e8.5	0	0.203357	1
Smyd1	c1run1_74_X_nkx2.5.e8.5	4.94187	0.203357	1
Tbx20	c1run1_74_X_nkx2.5.e8.5	9.08807	0.203357	1
Dnmt3b	c1run1_74_X_nkx2.5.e8.5	9.28878	0.203357	1
Gata2	c1run1_74_X_nkx2.5.e8.5	9.46197	0.203357	1
Gata3	c1run1_74_X_nkx2.5.e8.5	5.37904	0.203357	1
Hand1	c1run1_74_X_nkx2.5.e8.5	8.87283	0.203357	1
Msx1	c1run1_74_X_nkx2.5.e8.5	8.9741	0.203357	1
Nkx2-5	c1run1_75_X_nkx2.5.e8.5	3.16046	0.208821	1
Ankrd1	c1run1_75_X_nkx2.5.e8.5	0	0.208821	1
Cdkn2d	c1run1_75_X_nkx2.5.e8.5	3.25581	0.208821	1
Hopx	c1run1_75_X_nkx2.5.e8.5	0	0.208821	1
Mef2c	c1run1_75_X_nkx2.5.e8.5	1.15168	0.208821	1
Myocd	c1run1_75_X_nkx2.5.e8.5	0	0.208821	1
Smyd1	c1run1_75_X_nkx2.5.e8.5	0	0.208821	1
Tbx20	c1run1_75_X_nkx2.5.e8.5	4.12872	0.208821	1
Dnmt3b	c1run1_75_X_nkx2.5.e8.5	4.52299	0.208821	1
Gata2	c1run1_75_X_nkx2.5.e8.5	7.73863	0.208821	1
Gata3	c1run1_75_X_nkx2.5.e8.5	5.43126	0.208821	1
Hand1	c1run1_75_X_nkx2.5.e8.5	8.23622	0.208821	1
Msx1	c1run1_75_X_nkx2.5.e8.5	6.95877	0.208821	1
Nkx2-5	c1run1_76_X_nkx2.5.e8.5	4.27862	0.250908	1
Ankrd1	c1run1_76_X_nkx2.5.e8.5	2.02435	0.250908	1
Cdkn2d	c1run1_76_X_nkx2.5.e8.5	0	0.250908	1
Hopx	c1run1_76_X_nkx2.5.e8.5	5.91448	0.250908	1
Mef2c	c1run1_76_X_nkx2.5.e8.5	1.34144	0.250908	1
Myocd	c1run1_76_X_nkx2.5.e8.5	0	0.250908	1
Smyd1	c1run1_76_X_nkx2.5.e8.5	0	0.250908	1
Tbx20	c1run1_76_X_nkx2.5.e8.5	0	0.250908	1
Dnmt3b	c1run1_76_X_nkx2.5.e8.5	6.6019	0.250908	1
Gata2	c1run1_76_X_nkx2.5.e8.5	0	0.250908	1
Gata3	c1run1_76_X_nkx2.5.e8.5	0	0.250908	1
Hand1	c1run1_76_X_nkx2.5.e8.5	0	0.250908	1
Msx1	c1run1_76_X_nkx2.5.e8.5	0	0.250908	1
Nkx2-5	c1run1_77_X_nkx2.5.e8.5	4.74426	1.02557	2
Ankrd1	c1run1_77_X_nkx2.5.e8.5	12.3745	1.02557	2
Cdkn2d	c1run1_77_X_nkx2.5.e8.5	8.3578	1.02557	2
Hopx	c1run1_77_X_nkx2.5.e8.5	4.40757	1.02557	2
Mef2c	c1run1_77_X_nkx2.5.e8.5	7.98153	1.02557	2
Myocd	c1run1_77_X_nkx2.5.e8.5	10.1868	1.02557	2
Smyd1	c1run1_77_X_nkx2.5.e8.5	4.35936	1.02557	2
Tbx20	c1run1_77_X_nkx2.5.e8.5	0	1.02557	2
Dnmt3b	c1run1_77_X_nkx2.5.e8.5	1.25984	1.02557	2
Gata2	c1run1_77_X_nkx2.5.e8.5	0	1.02557	2
Gata3	c1run1_77_X_nkx2.5.e8.5	0	1.02557	2
Hand1	c1run1_77_X_nkx2.5.e8.5	0	1.02557	2
Msx1	c1run1_77_X_nkx2.5.e8.5	0	1.02557	2
Nkx2-5	c1run1_78_X_nkx2.5.e8.5	3.38128	0.2217	NA
Ankrd1	c1run1_78_X_nkx2.5.e8.5	5.03057	0.2217	NA
Cdkn2d	c1run1_78_X_nkx2.5.e8.5	0.892477	0.2217	NA
Hopx	c1run1_78_X_nkx2.5.e8.5	0	0.2217	NA
Mef2c	c1run1_78_X_nkx2.5.e8.5	1.83555	0.2217	NA
Myocd	c1run1_78_X_nkx2.5.e8.5	0	0.2217	NA
Smyd1	c1run1_78_X_nkx2.5.e8.5	0	0.2217	NA
Tbx20	c1run1_78_X_nkx2.5.e8.5	2.97285	0.2217	NA
Dnmt3b	c1run1_78_X_nkx2.5.e8.5	3.60083	0.2217	NA
Gata2	c1run1_78_X_nkx2.5.e8.5	0	0.2217	NA
Gata3	c1run1_78_X_nkx2.5.e8.5	0	0.2217	NA
Hand1	c1run1_78_X_nkx2.5.e8.5	9.98595	0.2217	NA
Msx1	c1run1_78_X_nkx2.5.e8.5	0	0.2217	NA
Nkx2-5	c1run1_83_X_nkx2.5.e8.5	6.22147	1.0302	2
Ankrd1	c1run1_83_X_nkx2.5.e8.5	8.86332	1.0302	2
Cdkn2d	c1run1_83_X_nkx2.5.e8.5	8.08508	1.0302	2
Hopx	c1run1_83_X_nkx2.5.e8.5	2.59963	1.0302	2
Mef2c	c1run1_83_X_nkx2.5.e8.5	9.54201	1.0302	2
Myocd	c1run1_83_X_nkx2.5.e8.5	8.90961	1.0302	2
Smyd1	c1run1_83_X_nkx2.5.e8.5	8.55811	1.0302	2
Tbx20	c1run1_83_X_nkx2.5.e8.5	6.76378	1.0302	2
Dnmt3b	c1run1_83_X_nkx2.5.e8.5	8.88875	1.0302	2
Gata2	c1run1_83_X_nkx2.5.e8.5	0	1.0302	2
Gata3	c1run1_83_X_nkx2.5.e8.5	0	1.0302	2
Hand1	c1run1_83_X_nkx2.5.e8.5	8.55634	1.0302	2
Msx1	c1run1_83_X_nkx2.5.e8.5	0	1.0302	2
Nkx2-5	c1run1_85_X_nkx2.5.e8.5	5.41198	1.0117	2
Ankrd1	c1run1_85_X_nkx2.5.e8.5	4.40315	1.0117	2
Cdkn2d	c1run1_85_X_nkx2.5.e8.5	8.92498	1.0117	2
Hopx	c1run1_85_X_nkx2.5.e8.5	7.96108	1.0117	2
Mef2c	c1run1_85_X_nkx2.5.e8.5	10.0177	1.0117	2
Myocd	c1run1_85_X_nkx2.5.e8.5	9.7316	1.0117	2
Smyd1	c1run1_85_X_nkx2.5.e8.5	9.1844	1.0117	2
Tbx20	c1run1_85_X_nkx2.5.e8.5	10.575	1.0117	2
Dnmt3b	c1run1_85_X_nkx2.5.e8.5	3.0975	1.0117	2
Gata2	c1run1_85_X_nkx2.5.e8.5	0	1.0117	2
Gata3	c1run1_85_X_nkx2.5.e8.5	0	1.0117	2
Hand1	c1run1_85_X_nkx2.5.e8.5	8.98719	1.0117	2
Msx1	c1run1_85_X_nkx2.5.e8.5	0	1.0117	2
Nkx2-5	c1run1_91_X_nkx2.5.e8.5	5.83302	0.232282	3
Ankrd1	c1run1_91_X_nkx2.5.e8.5	4.8399	0.232282	3
Cdkn2d	c1run1_91_X_nkx2.5.e8.5	0	0.232282	3
Hopx	c1run1_91_X_nkx2.5.e8.5	0	0.232282	3
Mef2c	c1run1_91_X_nkx2.5.e8.5	0	0.232282	3
Myocd	c1run1_91_X_nkx2.5.e8.5	0	0.232282	3
Smyd1	c1run1_91_X_nkx2.5.e8.5	0	0.232282	3
Tbx20	c1run1_91_X_nkx2.5.e8.5	0	0.232282	3
Dnmt3b	c1run1_91_X_nkx2.5.e8.5	7.97689	0.232282	3
Gata2	c1run1_91_X_nkx2.5.e8.5	7.97689	0.232282	3
Gata3	c1run1_91_X_nkx2.5.e8.5	10.6885	0.232282	3
Hand1	c1run1_91_X_nkx2.5.e8.5	0.78855	0.232282	3
Msx1	c1run1_91_X_nkx2.5.e8.5	0	0.232282	3
Nkx2-5	c1run1_95_X_nkx2.5.e8.5	5.94986	0.818524	2
Ankrd1	c1run1_95_X_nkx2.5.e8.5	13.3593	0.818524	2
Cdkn2d	c1run1_95_X_nkx2.5.e8.5	5.34919	0.818524	2
Hopx	c1run1_95_X_nkx2.5.e8.5	6.77055	0.818524	2
Mef2c	c1run1_95_X_nkx2.5.e8.5	11.9174	0.818524	2
Myocd	c1run1_95_X_nkx2.5.e8.5	9.58313	0.818524	2
Smyd1	c1run1_95_X_nkx2.5.e8.5	6.57205	0.818524	2
Tbx20	c1run1_95_X_nkx2.5.e8.5	11.4555	0.818524	2
Dnmt3b	c1run1_95_X_nkx2.5.e8.5	0	0.818524	2
Gata2	c1run1_95_X_nkx2.5.e8.5	0	0.818524	2
Gata3	c1run1_95_X_nkx2.5.e8.5	2.8938	0.818524	2
Hand1	c1run1_95_X_nkx2.5.e8.5	7.67178	0.818524	2
Msx1	c1run1_95_X_nkx2.5.e8.5	0	0.818524	2
Nkx2-5	c1run2_09_X_nkx2.5.e7.5	3.51704	0.11061	1
Ankrd1	c1run2_09_X_nkx2.5.e7.5	0	0.11061	1
Cdkn2d	c1run2_09_X_nkx2.5.e7.5	3.51704	0.11061	1
Hopx	c1run2_09_X_nkx2.5.e7.5	0	0.11061	1
Mef2c	c1run2_09_X_nkx2.5.e7.5	8.19745	0.11061	1
Myocd	c1run2_09_X_nkx2.5.e7.5	0	0.11061	1
Smyd1	c1run2_09_X_nkx2.5.e7.5	0	0.11061	1
Tbx20	c1run2_09_X_nkx2.5.e7.5	3.51704	0.11061	1
Dnmt3b	c1run2_09_X_nkx2.5.e7.5	8.74609	0.11061	1
Gata2	c1run2_09_X_nkx2.5.e7.5	5.41929	0.11061	1
Gata3	c1run2_09_X_nkx2.5.e7.5	0	0.11061	1
Hand1	c1run2_09_X_nkx2.5.e7.5	8.59835	0.11061	1
Msx1	c1run2_09_X_nkx2.5.e7.5	6.40233	0.11061	1
Nkx2-5	c1run2_17_X_nkx2.5.e7.5	0	0.046714	1
Ankrd1	c1run2_17_X_nkx2.5.e7.5	0	0.046714	1
Cdkn2d	c1run2_17_X_nkx2.5.e7.5	0	0.046714	1
Hopx	c1run2_17_X_nkx2.5.e7.5	0	0.046714	1
Mef2c	c1run2_17_X_nkx2.5.e7.5	6.40898	0.046714	1
Myocd	c1run2_17_X_nkx2.5.e7.5	0	0.046714	1
Smyd1	c1run2_17_X_nkx2.5.e7.5	0	0.046714	1
Tbx20	c1run2_17_X_nkx2.5.e7.5	9.03723	0.046714	1
Dnmt3b	c1run2_17_X_nkx2.5.e7.5	8.16249	0.046714	1
Gata2	c1run2_17_X_nkx2.5.e7.5	10.3274	0.046714	1
Gata3	c1run2_17_X_nkx2.5.e7.5	3.36886	0.046714	1
Hand1	c1run2_17_X_nkx2.5.e7.5	6.37695	0.046714	1
Msx1	c1run2_17_X_nkx2.5.e7.5	8.97973	0.046714	1
Nkx2-5	c1run2_19_X_nkx2.5.e7.5	0	0.0147	1
Ankrd1	c1run2_19_X_nkx2.5.e7.5	0	0.0147	1
Cdkn2d	c1run2_19_X_nkx2.5.e7.5	0	0.0147	1
Hopx	c1run2_19_X_nkx2.5.e7.5	0	0.0147	1
Mef2c	c1run2_19_X_nkx2.5.e7.5	7.94019	0.0147	1
Myocd	c1run2_19_X_nkx2.5.e7.5	0	0.0147	1
Smyd1	c1run2_19_X_nkx2.5.e7.5	0	0.0147	1
Tbx20	c1run2_19_X_nkx2.5.e7.5	9.44399	0.0147	1
Dnmt3b	c1run2_19_X_nkx2.5.e7.5	8.60763	0.0147	1
Gata2	c1run2_19_X_nkx2.5.e7.5	9.38866	0.0147	1
Gata3	c1run2_19_X_nkx2.5.e7.5	2.12431	0.0147	1
Hand1	c1run2_19_X_nkx2.5.e7.5	7.85062	0.0147	1
Msx1	c1run2_19_X_nkx2.5.e7.5	8.58256	0.0147	1
Nkx2-5	c1run2_26_X_nkx2.5.e7.5	1.64039	0	1
Ankrd1	c1run2_26_X_nkx2.5.e7.5	0	0	1
Cdkn2d	c1run2_26_X_nkx2.5.e7.5	0	0	1
Hopx	c1run2_26_X_nkx2.5.e7.5	0	0	1
Mef2c	c1run2_26_X_nkx2.5.e7.5	7.09297	0	1
Myocd	c1run2_26_X_nkx2.5.e7.5	0	0	1
Smyd1	c1run2_26_X_nkx2.5.e7.5	0	0	1
Tbx20	c1run2_26_X_nkx2.5.e7.5	8.5939	0	1
Dnmt3b	c1run2_26_X_nkx2.5.e7.5	8.31572	0	1
Gata2	c1run2_26_X_nkx2.5.e7.5	9.61558	0	1
Gata3	c1run2_26_X_nkx2.5.e7.5	4.93758	0	1
Hand1	c1run2_26_X_nkx2.5.e7.5	8.76516	0	1
Msx1	c1run2_26_X_nkx2.5.e7.5	8.22674	0	1
Nkx2-5	c1run2_27_X_nkx2.5.e7.5	0	0.00491761	1
Ankrd1	c1run2_27_X_nkx2.5.e7.5	0	0.00491761	1
Cdkn2d	c1run2_27_X_nkx2.5.e7.5	0	0.00491761	1
Hopx	c1run2_27_X_nkx2.5.e7.5	0	0.00491761	1
Mef2c	c1run2_27_X_nkx2.5.e7.5	6.7016	0.00491761	1
Myocd	c1run2_27_X_nkx2.5.e7.5	0	0.00491761	1
Smyd1	c1run2_27_X_nkx2.5.e7.5	0	0.00491761	1
Tbx20	c1run2_27_X_nkx2.5.e7.5	8.40709	0.00491761	1
Dnmt3b	c1run2_27_X_nkx2.5.e7.5	9.55748	0.00491761	1
Gata2	c1run2_27_X_nkx2.5.e7.5	9.00277	0.00491761	1
Gata3	c1run2_27_X_nkx2.5.e7.5	6.88054	0.00491761	1
Hand1	c1run2_27_X_nkx2.5.e7.5	9.85648	0.00491761	1
Msx1	c1run2_27_X_nkx2.5.e7.5	8.08987	0.00491761	1
Nkx2-5	c1run2_28_X_nkx2.5.e7.5	0	0.0153631	1
Ankrd1	c1run2_28_X_nkx2.5.e7.5	0	0.0153631	1
Cdkn2d	c1run2_28_X_nkx2.5.e7.5	0	0.0153631	1
Hopx	c1run2_28_X_nkx2.5.e7.5	0	0.0153631	1
Mef2c	c1run2_28_X_nkx2.5.e7.5	4.61275	0.0153631	1
Myocd	c1run2_28_X_nkx2.5.e7.5	0	0.0153631	1
Smyd1	c1run2_28_X_nkx2.5.e7.5	0	0.0153631	1
Tbx20	c1run2_28_X_nkx2.5.e7.5	9.03335	0.0153631	1
Dnmt3b	c1run2_28_X_nkx2.5.e7.5	10.9258	0.0153631	1
Gata2	c1run2_28_X_nkx2.5.e7.5	8.70285	0.0153631	1
Gata3	c1run2_28_X_nkx2.5.e7.5	6.22405	0.0153631	1
Hand1	c1run2_28_X_nkx2.5.e7.5	9.52194	0.0153631	1
Msx1	c1run2_28_X_nkx2.5.e7.5	8.6912	0.0153631	1
Nkx2-5	c1run2_33_X_nkx2.5.e7.5	0	0.0212085	1
Ankrd1	c1run2_33_X_nkx2.5.e7.5	0	0.0212085	1
Cdkn2d	c1run2_33_X_nkx2.5.e7.5	0	0.0212085	1
Hopx	c1run2_33_X_nkx2.5.e7.5	0	0.0212085	1
Mef2c	c1run2_33_X_nkx2.5.e7.5	4.65983	0.0212085	1
Myocd	c1run2_33_X_nkx2.5.e7.5	0	0.0212085	1
Smyd1	c1run2_33_X_nkx2.5.e7.5	0	0.0212085	1
Tbx20	c1run2_33_X_nkx2.5.e7.5	7.91138	0.0212085	1
Dnmt3b	c1run2_33_X_nkx2.5.e7.5	9.01801	0.0212085	1
Gata2	c1run2_33_X_nkx2.5.e7.5	8.25737	0.0212085	1
Gata3	c1run2_33_X_nkx2.5.e7.5	6.11442	0.0212085	1
Hand1	c1run2_33_X_nkx2.5.e7.5	10.6318	0.0212085	1
Msx1	c1run2_33_X_nkx2.5.e7.5	8.68193	0.0212085	1
Nkx2-5	c1run2_36_X_nkx2.5.e7.5	3.90558	0.16675	1
Ankrd1	c1run2_36_X_nkx2.5.e7.5	1.15969	0.16675	1
Cdkn2d	c1run2_36_X_nkx2.5.e7.5	5.97994	0.16675	1
Hopx	c1run2_36_X_nkx2.5.e7.5	0	0.16675	1
Mef2c	c1run2_36_X_nkx2.5.e7.5	0	0.16675	1
Myocd	c1run2_36_X_nkx2.5.e7.5	9.09508	0.16675	1
Smyd1	c1run2_36_X_nkx2.5.e7.5	0	0.16675	1
Tbx20	c1run2_36_X_nkx2.5.e7.5	7.697	0.16675	1
Dnmt3b	c1run2_36_X_nkx2.5.e7.5	7.32371	0.16675	1
Gata2	c1run2_36_X_nkx2.5.e7.5	1.15969	0.16675	1
Gata3	c1run2_36_X_nkx2.5.e7.5	0	0.16675	1
Hand1	c1run2_36_X_nkx2.5.e7.5	8.59413	0.16675	1
Msx1	c1run2_36_X_nkx2.5.e7.5	7.52078	0.16675	1
Nkx2-5	c1run2_39_X_nkx2.5.e7.5	0	0.0141594	1
Ankrd1	c1run2_39_X_nkx2.5.e7.5	0	0.0141594	1
Cdkn2d	c1run2_39_X_nkx2.5.e7.5	0	0.0141594	1
Hopx	c1run2_39_X_nkx2.5.e7.5	0	0.0141594	1
Mef2c	c1run2_39_X_nkx2.5.e7.5	6.54409	0.0141594	1
Myocd	c1run2_39_X_nkx2.5.e7.5	0	0.0141594	1
Smyd1	c1run2_39_X_nkx2.5.e7.5	0	0.0141594	1
Tbx20	c1run2_39_X_nkx2.5.e7.5	8.06446	0.0141594	1
Dnmt3b	c1run2_39_X_nkx2.5.e7.5	11.862	0.0141594	1
Gata2	c1run2_39_X_nkx2.5.e7.5	8.75428	0.0141594	1
Gata3	c1run2_39_X_nkx2.5.e7.5	5.52774	0.0141594	1
Hand1	c1run2_39_X_nkx2.5.e7.5	16.0848	0.0141594	1
Msx1	c1run2_39_X_nkx2.5.e7.5	6.85655	0.0141594	1
Nkx2-5	c1run2_41_X_nkx2.5.e7.5	0	0.0232579	1
Ankrd1	c1run2_41_X_nkx2.5.e7.5	0	0.0232579	1
Cdkn2d	c1run2_41_X_nkx2.5.e7.5	0	0.0232579	1
Hopx	c1run2_41_X_nkx2.5.e7.5	0	0.0232579	1
Mef2c	c1run2_41_X_nkx2.5.e7.5	5.12168	0.0232579	1
Myocd	c1run2_41_X_nkx2.5.e7.5	0	0.0232579	1
Smyd1	c1run2_41_X_nkx2.5.e7.5	0	0.0232579	1
Tbx20	c1run2_41_X_nkx2.5.e7.5	5.12168	0.0232579	1
Dnmt3b	c1run2_41_X_nkx2.5.e7.5	7.41007	0.0232579	1
Gata2	c1run2_41_X_nkx2.5.e7.5	8.93344	0.0232579	1
Gata3	c1run2_41_X_nkx2.5.e7.5	4.65273	0.0232579	1
Hand1	c1run2_41_X_nkx2.5.e7.5	9.98107	0.0232579	1
Msx1	c1run2_41_X_nkx2.5.e7.5	7.23608	0.0232579	1
Nkx2-5	c1run2_43_X_nkx2.5.e7.5	0	0.0427851	1
Ankrd1	c1run2_43_X_nkx2.5.e7.5	0	0.0427851	1
Cdkn2d	c1run2_43_X_nkx2.5.e7.5	0	0.0427851	1
Hopx	c1run2_43_X_nkx2.5.e7.5	0	0.0427851	1
Mef2c	c1run2_43_X_nkx2.5.e7.5	7.04612	0.0427851	1
Myocd	c1run2_43_X_nkx2.5.e7.5	0	0.0427851	1
Smyd1	c1run2_43_X_nkx2.5.e7.5	0	0.0427851	1
Tbx20	c1run2_43_X_nkx2.5.e7.5	7.35334	0.0427851	1
Dnmt3b	c1run2_43_X_nkx2.5.e7.5	11.7117	0.0427851	1
Gata2	c1run2_43_X_nkx2.5.e7.5	8.61332	0.0427851	1
Gata3	c1run2_43_X_nkx2.5.e7.5	4.88326	0.0427851	1
Hand1	c1run2_43_X_nkx2.5.e7.5	9.44441	0.0427851	1
Msx1	c1run2_43_X_nkx2.5.e7.5	8.27117	0.0427851	1
Nkx2-5	c1run2_44_X_nkx2.5.e7.5	1.03335	0.15233	1
Ankrd1	c1run2_44_X_nkx2.5.e7.5	0	0.15233	1
Cdkn2d	c1run2_44_X_nkx2.5.e7.5	0.835986	0.15233	1
Hopx	c1run2_44_X_nkx2.5.e7.5	0	0.15233	1
Mef2c	c1run2_44_X_nkx2.5.e7.5	0	0.15233	1
Myocd	c1run2_44_X_nkx2.5.e7.5	0	0.15233	1
Smyd1	c1run2_44_X_nkx2.5.e7.5	0	0.15233	1
Tbx20	c1run2_44_X_nkx2.5.e7.5	1.95554	0.15233	1
Dnmt3b	c1run2_44_X_nkx2.5.e7.5	9.68057	0.15233	1
Gata2	c1run2_44_X_nkx2.5.e7.5	1.20693	0.15233	1
Gata3	c1run2_44_X_nkx2.5.e7.5	6.4183	0.15233	1
Hand1	c1run2_44_X_nkx2.5.e7.5	11.1108	0.15233	1
Msx1	c1run2_44_X_nkx2.5.e7.5	8.92922	0.15233	1
Nkx2-5	c1run2_46_X_nkx2.5.e7.5	2.21903	0.136786	1
Ankrd1	c1run2_46_X_nkx2.5.e7.5	0	0.136786	1
Cdkn2d	c1run2_46_X_nkx2.5.e7.5	0	0.136786	1
Hopx	c1run2_46_X_nkx2.5.e7.5	0	0.136786	1
Mef2c	c1run2_46_X_nkx2.5.e7.5	0.936556	0.136786	1
Myocd	c1run2_46_X_nkx2.5.e7.5	0	0.136786	1
Smyd1	c1run2_46_X_nkx2.5.e7.5	0	0.136786	1
Tbx20	c1run2_46_X_nkx2.5.e7.5	5.77934	0.136786	1
Dnmt3b	c1run2_46_X_nkx2.5.e7.5	7.35477	0.136786	1
Gata2	c1run2_46_X_nkx2.5.e7.5	8.73312	0.136786	1
Gata3	c1run2_46_X_nkx2.5.e7.5	6.83706	0.136786	1
Hand1	c1run2_46_X_nkx2.5.e7.5	8.94057	0.136786	1
Msx1	c1run2_46_X_nkx2.5.e7.5	9.19346	0.136786	1
Nkx2-5	c1run2_49_X_nkx2.5.e7.5	2.74401	0.149747	1
Ankrd1	c1run2_49_X_nkx2.5.e7.5	0	0.149747	1
Cdkn2d	c1run2_49_X_nkx2.5.e7.5	4.99725	0.149747	1
Hopx	c1run2_49_X_nkx2.5.e7.5	0	0.149747	1
Mef2c	c1run2_49_X_nkx2.5.e7.5	6.64862	0.149747	1
Myocd	c1run2_49_X_nkx2.5.e7.5	0	0.149747	1
Smyd1	c1run2_49_X_nkx2.5.e7.5	0	0.149747	1
Tbx20	c1run2_49_X_nkx2.5.e7.5	5.95568	0.149747	1
Dnmt3b	c1run2_49_X_nkx2.5.e7.5	8.3553	0.149747	1
Gata2	c1run2_49_X_nkx2.5.e7.5	3.72386	0.149747	1
Gata3	c1run2_49_X_nkx2.5.e7.5	4.5225	0.149747	1
Hand1	c1run2_49_X_nkx2.5.e7.5	8.76204	0.149747	1
Msx1	c1run2_49_X_nkx2.5.e7.5	7.72151	0.149747	1
Nkx2-5	c1run2_51_X_nkx2.5.e7.5	0	0.147344	1
Ankrd1	c1run2_51_X_nkx2.5.e7.5	0	0.147344	1
Cdkn2d	c1run2_51_X_nkx2.5.e7.5	0	0.147344	1
Hopx	c1run2_51_X_nkx2.5.e7.5	0	0.147344	1
Mef2c	c1run2_51_X_nkx2.5.e7.5	0	0.147344	1
Myocd	c1run2_51_X_nkx2.5.e7.5	0	0.147344	1
Smyd1	c1run2_51_X_nkx2.5.e7.5	0	0.147344	1
Tbx20	c1run2_51_X_nkx2.5.e7.5	0.814	0.147344	1
Dnmt3b	c1run2_51_X_nkx2.5.e7.5	10.3489	0.147344	1
Gata2	c1run2_51_X_nkx2.5.e7.5	0	0.147344	1
Gata3	c1run2_51_X_nkx2.5.e7.5	4.30007	0.147344	1
Hand1	c1run2_51_X_nkx2.5.e7.5	9.24305	0.147344	1
Msx1	c1run2_51_X_nkx2.5.e7.5	0.814	0.147344	1
Nkx2-5	c1run2_53_X_nkx2.5.e7.5	2.67538	0.17801	1
Ankrd1	c1run2_53_X_nkx2.5.e7.5	0	0.17801	1
Cdkn2d	c1run2_53_X_nkx2.5.e7.5	7.557	0.17801	1
Hopx	c1run2_53_X_nkx2.5.e7.5	0	0.17801	1
Mef2c	c1run2_53_X_nkx2.5.e7.5	1.9458	0.17801	1
Myocd	c1run2_53_X_nkx2.5.e7.5	0	0.17801	1
Smyd1	c1run2_53_X_nkx2.5.e7.5	0	0.17801	1
Tbx20	c1run2_53_X_nkx2.5.e7.5	0	0.17801	1
Dnmt3b	c1run2_53_X_nkx2.5.e7.5	7.47969	0.17801	1
Gata2	c1run2_53_X_nkx2.5.e7.5	3.77377	0.17801	1
Gata3	c1run2_53_X_nkx2.5.e7.5	1.82194	0.17801	1
Hand1	c1run2_53_X_nkx2.5.e7.5	3.80681	0.17801	1
Msx1	c1run2_53_X_nkx2.5.e7.5	4.51534	0.17801	1
Nkx2-5	c1run2_61_X_nkx2.5.e7.5	0	0.148252	1
Ankrd1	c1run2_61_X_nkx2.5.e7.5	0	0.148252	1
Cdkn2d	c1run2_61_X_nkx2.5.e7.5	0.405236	0.148252	1
Hopx	c1run2_61_X_nkx2.5.e7.5	0	0.148252	1
Mef2c	c1run2_61_X_nkx2.5.e7.5	1.19989	0.148252	1
Myocd	c1run2_61_X_nkx2.5.e7.5	0	0.148252	1
Smyd1	c1run2_61_X_nkx2.5.e7.5	0	0.148252	1
Tbx20	c1run2_61_X_nkx2.5.e7.5	0.721251	0.148252	1
Dnmt3b	c1run2_61_X_nkx2.5.e7.5	8.39652	0.148252	1
Gata2	c1run2_61_X_nkx2.5.e7.5	9.49247	0.148252	1
Gata3	c1run2_61_X_nkx2.5.e7.5	6.29479	0.148252	1
Hand1	c1run2_61_X_nkx2.5.e7.5	0.405236	0.148252	1
Msx1	c1run2_61_X_nkx2.5.e7.5	0.405236	0.148252	1
Nkx2-5	c1run3_01_X_nkx2.5.e9.5	6.21908	0.70573	2
Ankrd1	c1run3_01_X_nkx2.5.e9.5	10.4762	0.70573	2
Cdkn2d	c1run3_01_X_nkx2.5.e9.5	1.42737	0.70573	2
Hopx	c1run3_01_X_nkx2.5.e9.5	0	0.70573	2
Mef2c	c1run3_01_X_nkx2.5.e9.5	9.50178	0.70573	2
Myocd	c1run3_01_X_nkx2.5.e9.5	9.34382	0.70573	2
Smyd1	c1run3_01_X_nkx2.5.e9.5	8.36465	0.70573	2
Tbx20	c1run3_01_X_nkx2.5.e9.5	9.1643	0.70573	2
Dnmt3b	c1run3_01_X_nkx2.5.e9.5	0	0.70573	2
Gata2	c1run3_01_X_nkx2.5.e9.5	0	0.70573	2
Gata3	c1run3_01_X_nkx2.5.e9.5	8.65504	0.70573	2
Hand1	c1run3_01_X_nkx2.5.e9.5	8.95185	0.70573	2
Msx1	c1run3_01_X_nkx2.5.e9.5	0	0.70573	2
Nkx2-5	c1run3_02_X_nkx2.5.e9.5	1.32918	0.259737	NA
Ankrd1	c1run3_02_X_nkx2.5.e9.5	2.46932	0.259737	NA
Cdkn2d	c1run3_02_X_nkx2.5.e9.5	0	0.259737	NA
Hopx	c1run3_02_X_nkx2.5.e9.5	0	0.259737	NA
Mef2c	c1run3_02_X_nkx2.5.e9.5	4.47096	0.259737	NA
Myocd	c1run3_02_X_nkx2.5.e9.5	0	0.259737	NA
Smyd1	c1run3_02_X_nkx2.5.e9.5	2.81771	0.259737	NA
Tbx20	c1run3_02_X_nkx2.5.e9.5	0	0.259737	NA
Dnmt3b	c1run3_02_X_nkx2.5.e9.5	0	0.259737	NA
Gata2	c1run3_02_X_nkx2.5.e9.5	0	0.259737	NA
Gata3	c1run3_02_X_nkx2.5.e9.5	0	0.259737	NA
Hand1	c1run3_02_X_nkx2.5.e9.5	0	0.259737	NA
Msx1	c1run3_02_X_nkx2.5.e9.5	0	0.259737	NA
Nkx2-5	c1run3_04_X_nkx2.5.e9.5	5.64828	0.274625	3
Ankrd1	c1run3_04_X_nkx2.5.e9.5	1.69343	0.274625	3
Cdkn2d	c1run3_04_X_nkx2.5.e9.5	0	0.274625	3
Hopx	c1run3_04_X_nkx2.5.e9.5	0	0.274625	3
Mef2c	c1run3_04_X_nkx2.5.e9.5	0	0.274625	3
Myocd	c1run3_04_X_nkx2.5.e9.5	0	0.274625	3
Smyd1	c1run3_04_X_nkx2.5.e9.5	5.1996	0.274625	3
Tbx20	c1run3_04_X_nkx2.5.e9.5	0	0.274625	3
Dnmt3b	c1run3_04_X_nkx2.5.e9.5	6.72806	0.274625	3
Gata2	c1run3_04_X_nkx2.5.e9.5	0	0.274625	3
Gata3	c1run3_04_X_nkx2.5.e9.5	2.45115	0.274625	3
Hand1	c1run3_04_X_nkx2.5.e9.5	4.90907	0.274625	3
Msx1	c1run3_04_X_nkx2.5.e9.5	7.16985	0.274625	3
Nkx2-5	c1run3_05_X_nkx2.5.e9.5	3.0998	0.261344	3
Ankrd1	c1run3_05_X_nkx2.5.e9.5	0	0.261344	3
Cdkn2d	c1run3_05_X_nkx2.5.e9.5	0	0.261344	3
Hopx	c1run3_05_X_nkx2.5.e9.5	0	0.261344	3
Mef2c	c1run3_05_X_nkx2.5.e9.5	9.15702	0.261344	3
Myocd	c1run3_05_X_nkx2.5.e9.5	0	0.261344	3
Smyd1	c1run3_05_X_nkx2.5.e9.5	1.53269	0.261344	3
Tbx20	c1run3_05_X_nkx2.5.e9.5	7.37254	0.261344	3
Dnmt3b	c1run3_05_X_nkx2.5.e9.5	1.53269	0.261344	3
Gata2	c1run3_05_X_nkx2.5.e9.5	0	0.261344	3
Gata3	c1run3_05_X_nkx2.5.e9.5	0	0.261344	3
Hand1	c1run3_05_X_nkx2.5.e9.5	2.25897	0.261344	3
Msx1	c1run3_05_X_nkx2.5.e9.5	1.53269	0.261344	3
Nkx2-5	c1run3_06_X_nkx2.5.e9.5	4.09121	0.232068	NA
Ankrd1	c1run3_06_X_nkx2.5.e9.5	2.32511	0.232068	NA
Cdkn2d	c1run3_06_X_nkx2.5.e9.5	0	0.232068	NA
Hopx	c1run3_06_X_nkx2.5.e9.5	0	0.232068	NA
Mef2c	c1run3_06_X_nkx2.5.e9.5	0	0.232068	NA
Myocd	c1run3_06_X_nkx2.5.e9.5	0	0.232068	NA
Smyd1	c1run3_06_X_nkx2.5.e9.5	0	0.232068	NA
Tbx20	c1run3_06_X_nkx2.5.e9.5	10.5402	0.232068	NA
Dnmt3b	c1run3_06_X_nkx2.5.e9.5	0	0.232068	NA
Gata2	c1run3_06_X_nkx2.5.e9.5	0	0.232068	NA
Gata3	c1run3_06_X_nkx2.5.e9.5	9.52638	0.232068	NA
Hand1	c1run3_06_X_nkx2.5.e9.5	9.63272	0.232068	NA
Msx1	c1run3_06_X_nkx2.5.e9.5	9.36079	0.232068	NA
Nkx2-5	c1run3_07_X_nkx2.5.e9.5	3.2254	0.262123	3
Ankrd1	c1run3_07_X_nkx2.5.e9.5	1.41714	0.262123	3
Cdkn2d	c1run3_07_X_nkx2.5.e9.5	0	0.262123	3
Hopx	c1run3_07_X_nkx2.5.e9.5	0	0.262123	3
Mef2c	c1run3_07_X_nkx2.5.e9.5	0	0.262123	3
Myocd	c1run3_07_X_nkx2.5.e9.5	0	0.262123	3
Smyd1	c1run3_07_X_nkx2.5.e9.5	0	0.262123	3
Tbx20	c1run3_07_X_nkx2.5.e9.5	0	0.262123	3
Dnmt3b	c1run3_07_X_nkx2.5.e9.5	2.11807	0.262123	3
Gata2	c1run3_07_X_nkx2.5.e9.5	0	0.262123	3
Gata3	c1run3_07_X_nkx2.5.e9.5	0	0.262123	3
Hand1	c1run3_07_X_nkx2.5.e9.5	7.92619	0.262123	3
Msx1	c1run3_07_X_nkx2.5.e9.5	9.22656	0.262123	3
Nkx2-5	c1run3_08_X_nkx2.5.e9.5	0	0.26539	3
Ankrd1	c1run3_08_X_nkx2.5.e9.5	2.66282	0.26539	3
Cdkn2d	c1run3_08_X_nkx2.5.e9.5	0	0.26539	3
Hopx	c1run3_08_X_nkx2.5.e9.5	0	0.26539	3
Mef2c	c1run3_08_X_nkx2.5.e9.5	0	0.26539	3
Myocd	c1run3_08_X_nkx2.5.e9.5	0	0.26539	3
Smyd1	c1run3_08_X_nkx2.5.e9.5	0	0.26539	3
Tbx20	c1run3_08_X_nkx2.5.e9.5	0	0.26539	3
Dnmt3b	c1run3_08_X_nkx2.5.e9.5	5.53381	0.26539	3
Gata2	c1run3_08_X_nkx2.5.e9.5	0	0.26539	3
Gata3	c1run3_08_X_nkx2.5.e9.5	5.15634	0.26539	3
Hand1	c1run3_08_X_nkx2.5.e9.5	0	0.26539	3
Msx1	c1run3_08_X_nkx2.5.e9.5	5.691	0.26539	3
Nkx2-5	c1run3_09_X_nkx2.5.e9.5	1.4298	0.262679	3
Ankrd1	c1run3_09_X_nkx2.5.e9.5	1.4298	0.262679	3
Cdkn2d	c1run3_09_X_nkx2.5.e9.5	0	0.262679	3
Hopx	c1run3_09_X_nkx2.5.e9.5	0	0.262679	3
Mef2c	c1run3_09_X_nkx2.5.e9.5	2.13362	0.262679	3
Myocd	c1run3_09_X_nkx2.5.e9.5	1.4298	0.262679	3
Smyd1	c1run3_09_X_nkx2.5.e9.5	0	0.262679	3
Tbx20	c1run3_09_X_nkx2.5.e9.5	0	0.262679	3
Dnmt3b	c1run3_09_X_nkx2.5.e9.5	0	0.262679	3
Gata2	c1run3_09_X_nkx2.5.e9.5	0	0.262679	3
Gata3	c1run3_09_X_nkx2.5.e9.5	1.4298	0.262679	3
Hand1	c1run3_09_X_nkx2.5.e9.5	0	0.262679	3
Msx1	c1run3_09_X_nkx2.5.e9.5	10.3763	0.262679	3
Nkx2-5	c1run3_10_X_nkx2.5.e9.5	7.89276	0.9357	2
Ankrd1	c1run3_10_X_nkx2.5.e9.5	12.0255	0.9357	2
Cdkn2d	c1run3_10_X_nkx2.5.e9.5	3.53565	0.9357	2
Hopx	c1run3_10_X_nkx2.5.e9.5	0	0.9357	2
Mef2c	c1run3_10_X_nkx2.5.e9.5	10.199	0.9357	2
Myocd	c1run3_10_X_nkx2.5.e9.5	8.99834	0.9357	2
Smyd1	c1run3_10_X_nkx2.5.e9.5	7.47259	0.9357	2
Tbx20	c1run3_10_X_nkx2.5.e9.5	7.6856	0.9357	2
Dnmt3b	c1run3_10_X_nkx2.5.e9.5	0	0.9357	2
Gata2	c1run3_10_X_nkx2.5.e9.5	0	0.9357	2
Gata3	c1run3_10_X_nkx2.5.e9.5	0	0.9357	2
Hand1	c1run3_10_X_nkx2.5.e9.5	0	0.9357	2
Msx1	c1run3_10_X_nkx2.5.e9.5	0	0.9357	2
Nkx2-5	c1run3_11_X_nkx2.5.e9.5	2.91631	0.257086	3
Ankrd1	c1run3_11_X_nkx2.5.e9.5	2.91631	0.257086	3
Cdkn2d	c1run3_11_X_nkx2.5.e9.5	0	0.257086	3
Hopx	c1run3_11_X_nkx2.5.e9.5	0	0.257086	3
Mef2c	c1run3_11_X_nkx2.5.e9.5	8.8992	0.257086	3
Myocd	c1run3_11_X_nkx2.5.e9.5	1.39905	0.257086	3
Smyd1	c1run3_11_X_nkx2.5.e9.5	0	0.257086	3
Tbx20	c1run3_11_X_nkx2.5.e9.5	0	0.257086	3
Dnmt3b	c1run3_11_X_nkx2.5.e9.5	7.62552	0.257086	3
Gata2	c1run3_11_X_nkx2.5.e9.5	0	0.257086	3
Gata3	c1run3_11_X_nkx2.5.e9.5	0	0.257086	3
Hand1	c1run3_11_X_nkx2.5.e9.5	1.39905	0.257086	3
Msx1	c1run3_11_X_nkx2.5.e9.5	0	0.257086	3
Nkx2-5	c1run3_12_X_nkx2.5.e9.5	4.0861	0.268453	3
Ankrd1	c1run3_12_X_nkx2.5.e9.5	0	0.268453	3
Cdkn2d	c1run3_12_X_nkx2.5.e9.5	0	0.268453	3
Hopx	c1run3_12_X_nkx2.5.e9.5	0	0.268453	3
Mef2c	c1run3_12_X_nkx2.5.e9.5	7.36488	0.268453	3
Myocd	c1run3_12_X_nkx2.5.e9.5	0	0.268453	3
Smyd1	c1run3_12_X_nkx2.5.e9.5	0	0.268453	3
Tbx20	c1run3_12_X_nkx2.5.e9.5	0	0.268453	3
Dnmt3b	c1run3_12_X_nkx2.5.e9.5	7.52994	0.268453	3
Gata2	c1run3_12_X_nkx2.5.e9.5	0	0.268453	3
Gata3	c1run3_12_X_nkx2.5.e9.5	0	0.268453	3
Hand1	c1run3_12_X_nkx2.5.e9.5	1.584	0.268453	3
Msx1	c1run3_12_X_nkx2.5.e9.5	6.84405	0.268453	3
Nkx2-5	c1run3_13_X_nkx2.5.e9.5	0	0.246878	3
Ankrd1	c1run3_13_X_nkx2.5.e9.5	1.88916	0.246878	3
Cdkn2d	c1run3_13_X_nkx2.5.e9.5	8.73321	0.246878	3
Hopx	c1run3_13_X_nkx2.5.e9.5	0	0.246878	3
Mef2c	c1run3_13_X_nkx2.5.e9.5	0	0.246878	3
Myocd	c1run3_13_X_nkx2.5.e9.5	0	0.246878	3
Smyd1	c1run3_13_X_nkx2.5.e9.5	0	0.246878	3
Tbx20	c1run3_13_X_nkx2.5.e9.5	0	0.246878	3
Dnmt3b	c1run3_13_X_nkx2.5.e9.5	0	0.246878	3
Gata2	c1run3_13_X_nkx2.5.e9.5	0	0.246878	3
Gata3	c1run3_13_X_nkx2.5.e9.5	0	0.246878	3
Hand1	c1run3_13_X_nkx2.5.e9.5	0	0.246878	3
Msx1	c1run3_13_X_nkx2.5.e9.5	9.48161	0.246878	3
Nkx2-5	c1run3_14_X_nkx2.5.e9.5	5.67445	0.275954	3
Ankrd1	c1run3_14_X_nkx2.5.e9.5	1.28132	0.275954	3
Cdkn2d	c1run3_14_X_nkx2.5.e9.5	5.93277	0.275954	3
Hopx	c1run3_14_X_nkx2.5.e9.5	1.28132	0.275954	3
Mef2c	c1run3_14_X_nkx2.5.e9.5	6.46381	0.275954	3
Myocd	c1run3_14_X_nkx2.5.e9.5	0	0.275954	3
Smyd1	c1run3_14_X_nkx2.5.e9.5	0	0.275954	3
Tbx20	c1run3_14_X_nkx2.5.e9.5	0	0.275954	3
Dnmt3b	c1run3_14_X_nkx2.5.e9.5	3.93604	0.275954	3
Gata2	c1run3_14_X_nkx2.5.e9.5	0	0.275954	3
Gata3	c1run3_14_X_nkx2.5.e9.5	0	0.275954	3
Hand1	c1run3_14_X_nkx2.5.e9.5	0	0.275954	3
Msx1	c1run3_14_X_nkx2.5.e9.5	5.7143	0.275954	3
Nkx2-5	c1run3_15_X_nkx2.5.e9.5	3.27333	0.271834	3
Ankrd1	c1run3_15_X_nkx2.5.e9.5	1.45088	0.271834	3
Cdkn2d	c1run3_15_X_nkx2.5.e9.5	8.12101	0.271834	3
Hopx	c1run3_15_X_nkx2.5.e9.5	0	0.271834	3
Mef2c	c1run3_15_X_nkx2.5.e9.5	7.26275	0.271834	3
Myocd	c1run3_15_X_nkx2.5.e9.5	4.32706	0.271834	3
Smyd1	c1run3_15_X_nkx2.5.e9.5	6.30412	0.271834	3
Tbx20	c1run3_15_X_nkx2.5.e9.5	0	0.271834	3
Dnmt3b	c1run3_15_X_nkx2.5.e9.5	6.36608	0.271834	3
Gata2	c1run3_15_X_nkx2.5.e9.5	8.54595	0.271834	3
Gata3	c1run3_15_X_nkx2.5.e9.5	5.72826	0.271834	3
Hand1	c1run3_15_X_nkx2.5.e9.5	0	0.271834	3
Msx1	c1run3_15_X_nkx2.5.e9.5	0	0.271834	3
Nkx2-5	c1run3_16_X_nkx2.5.e9.5	2.75425	0.266773	3
Ankrd1	c1run3_16_X_nkx2.5.e9.5	3.11481	0.266773	3
Cdkn2d	c1run3_16_X_nkx2.5.e9.5	0	0.266773	3
Hopx	c1run3_16_X_nkx2.5.e9.5	0	0.266773	3
Mef2c	c1run3_16_X_nkx2.5.e9.5	0	0.266773	3
Myocd	c1run3_16_X_nkx2.5.e9.5	0	0.266773	3
Smyd1	c1run3_16_X_nkx2.5.e9.5	0	0.266773	3
Tbx20	c1run3_16_X_nkx2.5.e9.5	0	0.266773	3
Dnmt3b	c1run3_16_X_nkx2.5.e9.5	3.40304	0.266773	3
Gata2	c1run3_16_X_nkx2.5.e9.5	0	0.266773	3
Gata3	c1run3_16_X_nkx2.5.e9.5	0	0.266773	3
Hand1	c1run3_16_X_nkx2.5.e9.5	0	0.266773	3
Msx1	c1run3_16_X_nkx2.5.e9.5	6.90414	0.266773	3
Nkx2-5	c1run3_17_X_nkx2.5.e9.5	4.41006	0.259807	3
Ankrd1	c1run3_17_X_nkx2.5.e9.5	1.82068	0.259807	3
Cdkn2d	c1run3_17_X_nkx2.5.e9.5	0	0.259807	3
Hopx	c1run3_17_X_nkx2.5.e9.5	0	0.259807	3
Mef2c	c1run3_17_X_nkx2.5.e9.5	0	0.259807	3
Myocd	c1run3_17_X_nkx2.5.e9.5	0	0.259807	3
Smyd1	c1run3_17_X_nkx2.5.e9.5	4.22707	0.259807	3
Tbx20	c1run3_17_X_nkx2.5.e9.5	0	0.259807	3
Dnmt3b	c1run3_17_X_nkx2.5.e9.5	8.38925	0.259807	3
Gata2	c1run3_17_X_nkx2.5.e9.5	0	0.259807	3
Gata3	c1run3_17_X_nkx2.5.e9.5	1.82068	0.259807	3
Hand1	c1run3_17_X_nkx2.5.e9.5	6.16811	0.259807	3
Msx1	c1run3_17_X_nkx2.5.e9.5	7.2806	0.259807	3
Nkx2-5	c1run3_18_X_nkx2.5.e9.5	0	0.270885	3
Ankrd1	c1run3_18_X_nkx2.5.e9.5	2.22754	0.270885	3
Cdkn2d	c1run3_18_X_nkx2.5.e9.5	3.06466	0.270885	3
Hopx	c1run3_18_X_nkx2.5.e9.5	0	0.270885	3
Mef2c	c1run3_18_X_nkx2.5.e9.5	8.49972	0.270885	3
Myocd	c1run3_18_X_nkx2.5.e9.5	0	0.270885	3
Smyd1	c1run3_18_X_nkx2.5.e9.5	0	0.270885	3
Tbx20	c1run3_18_X_nkx2.5.e9.5	0	0.270885	3
Dnmt3b	c1run3_18_X_nkx2.5.e9.5	4.27923	0.270885	3
Gata2	c1run3_18_X_nkx2.5.e9.5	0	0.270885	3
Gata3	c1run3_18_X_nkx2.5.e9.5	2.22754	0.270885	3
Hand1	c1run3_18_X_nkx2.5.e9.5	3.06466	0.270885	3
Msx1	c1run3_18_X_nkx2.5.e9.5	9.76532	0.270885	3
Nkx2-5	c1run3_19_X_nkx2.5.e9.5	3.76726	0.519958	3
Ankrd1	c1run3_19_X_nkx2.5.e9.5	8.83031	0.519958	3
Cdkn2d	c1run3_19_X_nkx2.5.e9.5	0	0.519958	3
Hopx	c1run3_19_X_nkx2.5.e9.5	4.01253	0.519958	3
Mef2c	c1run3_19_X_nkx2.5.e9.5	5.94388	0.519958	3
Myocd	c1run3_19_X_nkx2.5.e9.5	4.01253	0.519958	3
Smyd1	c1run3_19_X_nkx2.5.e9.5	7.95582	0.519958	3
Tbx20	c1run3_19_X_nkx2.5.e9.5	8.08209	0.519958	3
Dnmt3b	c1run3_19_X_nkx2.5.e9.5	5.37059	0.519958	3
Gata2	c1run3_19_X_nkx2.5.e9.5	0	0.519958	3
Gata3	c1run3_19_X_nkx2.5.e9.5	5.37059	0.519958	3
Hand1	c1run3_19_X_nkx2.5.e9.5	0	0.519958	3
Msx1	c1run3_19_X_nkx2.5.e9.5	0	0.519958	3
Nkx2-5	c1run3_20_X_nkx2.5.e9.5	2.07411	0.269381	3
Ankrd1	c1run3_20_X_nkx2.5.e9.5	0	0.269381	3
Cdkn2d	c1run3_20_X_nkx2.5.e9.5	0	0.269381	3
Hopx	c1run3_20_X_nkx2.5.e9.5	0	0.269381	3
Mef2c	c1run3_20_X_nkx2.5.e9.5	8.19568	0.269381	3
Myocd	c1run3_20_X_nkx2.5.e9.5	0	0.269381	3
Smyd1	c1run3_20_X_nkx2.5.e9.5	0	0.269381	3
Tbx20	c1run3_20_X_nkx2.5.e9.5	0	0.269381	3
Dnmt3b	c1run3_20_X_nkx2.5.e9.5	3.79113	0.269381	3
Gata2	c1run3_20_X_nkx2.5.e9.5	2.07411	0.269381	3
Gata3	c1run3_20_X_nkx2.5.e9.5	2.89175	0.269381	3
Hand1	c1run3_20_X_nkx2.5.e9.5	0	0.269381	3
Msx1	c1run3_20_X_nkx2.5.e9.5	8.78427	0.269381	3
Nkx2-5	c1run3_21_X_nkx2.5.e9.5	0	0.261361	3
Ankrd1	c1run3_21_X_nkx2.5.e9.5	2.33196	0.261361	3
Cdkn2d	c1run3_21_X_nkx2.5.e9.5	0	0.261361	3
Hopx	c1run3_21_X_nkx2.5.e9.5	0	0.261361	3
Mef2c	c1run3_21_X_nkx2.5.e9.5	4.2598	0.261361	3
Myocd	c1run3_21_X_nkx2.5.e9.5	0	0.261361	3
Smyd1	c1run3_21_X_nkx2.5.e9.5	0	0.261361	3
Tbx20	c1run3_21_X_nkx2.5.e9.5	1.59333	0.261361	3
Dnmt3b	c1run3_21_X_nkx2.5.e9.5	7.21212	0.261361	3
Gata2	c1run3_21_X_nkx2.5.e9.5	0	0.261361	3
Gata3	c1run3_21_X_nkx2.5.e9.5	0	0.261361	3
Hand1	c1run3_21_X_nkx2.5.e9.5	0	0.261361	3
Msx1	c1run3_21_X_nkx2.5.e9.5	1.59333	0.261361	3
Nkx2-5	c1run3_22_X_nkx2.5.e9.5	0	0.267333	3
Ankrd1	c1run3_22_X_nkx2.5.e9.5	1.63867	0.267333	3
Cdkn2d	c1run3_22_X_nkx2.5.e9.5	0	0.267333	3
Hopx	c1run3_22_X_nkx2.5.e9.5	0	0.267333	3
Mef2c	c1run3_22_X_nkx2.5.e9.5	0	0.267333	3
Myocd	c1run3_22_X_nkx2.5.e9.5	0	0.267333	3
Smyd1	c1run3_22_X_nkx2.5.e9.5	0	0.267333	3
Tbx20	c1run3_22_X_nkx2.5.e9.5	0	0.267333	3
Dnmt3b	c1run3_22_X_nkx2.5.e9.5	6.73784	0.267333	3
Gata2	c1run3_22_X_nkx2.5.e9.5	0	0.267333	3
Gata3	c1run3_22_X_nkx2.5.e9.5	3.2411	0.267333	3
Hand1	c1run3_22_X_nkx2.5.e9.5	0	0.267333	3
Msx1	c1run3_22_X_nkx2.5.e9.5	2.38614	0.267333	3
Nkx2-5	c1run3_23_X_nkx2.5.e9.5	0	0.266087	3
Ankrd1	c1run3_23_X_nkx2.5.e9.5	1.16369	0.266087	3
Cdkn2d	c1run3_23_X_nkx2.5.e9.5	0	0.266087	3
Hopx	c1run3_23_X_nkx2.5.e9.5	0	0.266087	3
Mef2c	c1run3_23_X_nkx2.5.e9.5	0	0.266087	3
Myocd	c1run3_23_X_nkx2.5.e9.5	1.79933	0.266087	3
Smyd1	c1run3_23_X_nkx2.5.e9.5	9.79209	0.266087	3
Tbx20	c1run3_23_X_nkx2.5.e9.5	0	0.266087	3
Dnmt3b	c1run3_23_X_nkx2.5.e9.5	8.78563	0.266087	3
Gata2	c1run3_23_X_nkx2.5.e9.5	0	0.266087	3
Gata3	c1run3_23_X_nkx2.5.e9.5	8.65855	0.266087	3
Hand1	c1run3_23_X_nkx2.5.e9.5	9.54383	0.266087	3
Msx1	c1run3_23_X_nkx2.5.e9.5	9.05486	0.266087	3
Nkx2-5	c1run3_24_X_nkx2.5.e9.5	6.02679	0.753005	2
Ankrd1	c1run3_24_X_nkx2.5.e9.5	4.17253	0.753005	2
Cdkn2d	c1run3_24_X_nkx2.5.e9.5	1.20802	0.753005	2
Hopx	c1run3_24_X_nkx2.5.e9.5	0	0.753005	2
Mef2c	c1run3_24_X_nkx2.5.e9.5	12.1278	0.753005	2
Myocd	c1run3_24_X_nkx2.5.e9.5	10.8954	0.753005	2
Smyd1	c1run3_24_X_nkx2.5.e9.5	10.4488	0.753005	2
Tbx20	c1run3_24_X_nkx2.5.e9.5	11.3467	0.753005	2
Dnmt3b	c1run3_24_X_nkx2.5.e9.5	0	0.753005	2
Gata2	c1run3_24_X_nkx2.5.e9.5	0	0.753005	2
Gata3	c1run3_24_X_nkx2.5.e9.5	6.11125	0.753005	2
Hand1	c1run3_24_X_nkx2.5.e9.5	9.51846	0.753005	2
Msx1	c1run3_24_X_nkx2.5.e9.5	4.83361	0.753005	2
Nkx2-5	c1run3_25_X_nkx2.5.e9.5	0	0.269383	3
Ankrd1	c1run3_25_X_nkx2.5.e9.5	2.90453	0.269383	3
Cdkn2d	c1run3_25_X_nkx2.5.e9.5	0	0.269383	3
Hopx	c1run3_25_X_nkx2.5.e9.5	0	0.269383	3
Mef2c	c1run3_25_X_nkx2.5.e9.5	0	0.269383	3
Myocd	c1run3_25_X_nkx2.5.e9.5	0	0.269383	3
Smyd1	c1run3_25_X_nkx2.5.e9.5	0	0.269383	3
Tbx20	c1run3_25_X_nkx2.5.e9.5	0	0.269383	3
Dnmt3b	c1run3_25_X_nkx2.5.e9.5	4.35496	0.269383	3
Gata2	c1run3_25_X_nkx2.5.e9.5	7.03072	0.269383	3
Gata3	c1run3_25_X_nkx2.5.e9.5	0	0.269383	3
Hand1	c1run3_25_X_nkx2.5.e9.5	5.19702	0.269383	3
Msx1	c1run3_25_X_nkx2.5.e9.5	4.56725	0.269383	3
Nkx2-5	c1run3_26_X_nkx2.5.e9.5	5.71831	0.953895	2
Ankrd1	c1run3_26_X_nkx2.5.e9.5	10.3779	0.953895	2
Cdkn2d	c1run3_26_X_nkx2.5.e9.5	8.2617	0.953895	2
Hopx	c1run3_26_X_nkx2.5.e9.5	1.86735	0.953895	2
Mef2c	c1run3_26_X_nkx2.5.e9.5	9.72436	0.953895	2
Myocd	c1run3_26_X_nkx2.5.e9.5	10.1225	0.953895	2
Smyd1	c1run3_26_X_nkx2.5.e9.5	9.34116	0.953895	2
Tbx20	c1run3_26_X_nkx2.5.e9.5	8.52291	0.953895	2
Dnmt3b	c1run3_26_X_nkx2.5.e9.5	7.03103	0.953895	2
Gata2	c1run3_26_X_nkx2.5.e9.5	0	0.953895	2
Gata3	c1run3_26_X_nkx2.5.e9.5	0	0.953895	2
Hand1	c1run3_26_X_nkx2.5.e9.5	0	0.953895	2
Msx1	c1run3_26_X_nkx2.5.e9.5	0	0.953895	2
Nkx2-5	c1run3_28_X_nkx2.5.e9.5	5.20708	0.958244	2
Ankrd1	c1run3_28_X_nkx2.5.e9.5	13.6246	0.958244	2
Cdkn2d	c1run3_28_X_nkx2.5.e9.5	7.04634	0.958244	2
Hopx	c1run3_28_X_nkx2.5.e9.5	6.56136	0.958244	2
Mef2c	c1run3_28_X_nkx2.5.e9.5	11.087	0.958244	2
Myocd	c1run3_28_X_nkx2.5.e9.5	9.51287	0.958244	2
Smyd1	c1run3_28_X_nkx2.5.e9.5	7.52584	0.958244	2
Tbx20	c1run3_28_X_nkx2.5.e9.5	8.84869	0.958244	2
Dnmt3b	c1run3_28_X_nkx2.5.e9.5	4.10204	0.958244	2
Gata2	c1run3_28_X_nkx2.5.e9.5	0	0.958244	2
Gata3	c1run3_28_X_nkx2.5.e9.5	0	0.958244	2
Hand1	c1run3_28_X_nkx2.5.e9.5	0	0.958244	2
Msx1	c1run3_28_X_nkx2.5.e9.5	2.19973	0.958244	2
Nkx2-5	c1run3_30_X_nkx2.5.e9.5	0	0.269429	3
Ankrd1	c1run3_30_X_nkx2.5.e9.5	3.07654	0.269429	3
Cdkn2d	c1run3_30_X_nkx2.5.e9.5	1.99072	0.269429	3
Hopx	c1run3_30_X_nkx2.5.e9.5	0	0.269429	3
Mef2c	c1run3_30_X_nkx2.5.e9.5	1.31451	0.269429	3
Myocd	c1run3_30_X_nkx2.5.e9.5	0	0.269429	3
Smyd1	c1run3_30_X_nkx2.5.e9.5	0	0.269429	3
Tbx20	c1run3_30_X_nkx2.5.e9.5	0	0.269429	3
Dnmt3b	c1run3_30_X_nkx2.5.e9.5	1.99072	0.269429	3
Gata2	c1run3_30_X_nkx2.5.e9.5	0	0.269429	3
Gata3	c1run3_30_X_nkx2.5.e9.5	0	0.269429	3
Hand1	c1run3_30_X_nkx2.5.e9.5	0	0.269429	3
Msx1	c1run3_30_X_nkx2.5.e9.5	9.55749	0.269429	3
Nkx2-5	c1run3_32_X_nkx2.5.e9.5	2.64383	0.399474	3
Ankrd1	c1run3_32_X_nkx2.5.e9.5	3.52354	0.399474	3
Cdkn2d	c1run3_32_X_nkx2.5.e9.5	3.52354	0.399474	3
Hopx	c1run3_32_X_nkx2.5.e9.5	1.85796	0.399474	3
Mef2c	c1run3_32_X_nkx2.5.e9.5	10.9361	0.399474	3
Myocd	c1run3_32_X_nkx2.5.e9.5	9.25264	0.399474	3
Smyd1	c1run3_32_X_nkx2.5.e9.5	8.9498	0.399474	3
Tbx20	c1run3_32_X_nkx2.5.e9.5	7.42309	0.399474	3
Dnmt3b	c1run3_32_X_nkx2.5.e9.5	0	0.399474	3
Gata2	c1run3_32_X_nkx2.5.e9.5	0	0.399474	3
Gata3	c1run3_32_X_nkx2.5.e9.5	1.85796	0.399474	3
Hand1	c1run3_32_X_nkx2.5.e9.5	5.87649	0.399474	3
Msx1	c1run3_32_X_nkx2.5.e9.5	3.82015	0.399474	3
Nkx2-5	c1run3_33_X_nkx2.5.e9.5	4.60877	0.857766	2
Ankrd1	c1run3_33_X_nkx2.5.e9.5	10.8711	0.857766	2
Cdkn2d	c1run3_33_X_nkx2.5.e9.5	4.26299	0.857766	2
Hopx	c1run3_33_X_nkx2.5.e9.5	6.25546	0.857766	2
Mef2c	c1run3_33_X_nkx2.5.e9.5	10.6226	0.857766	2
Myocd	c1run3_33_X_nkx2.5.e9.5	7.38711	0.857766	2
Smyd1	c1run3_33_X_nkx2.5.e9.5	9.48377	0.857766	2
Tbx20	c1run3_33_X_nkx2.5.e9.5	8.16486	0.857766	2
Dnmt3b	c1run3_33_X_nkx2.5.e9.5	0	0.857766	2
Gata2	c1run3_33_X_nkx2.5.e9.5	0	0.857766	2
Gata3	c1run3_33_X_nkx2.5.e9.5	0	0.857766	2
Hand1	c1run3_33_X_nkx2.5.e9.5	0	0.857766	2
Msx1	c1run3_33_X_nkx2.5.e9.5	3.13746	0.857766	2
Nkx2-5	c1run3_34_X_nkx2.5.e9.5	0	0.259469	3
Ankrd1	c1run3_34_X_nkx2.5.e9.5	0	0.259469	3
Cdkn2d	c1run3_34_X_nkx2.5.e9.5	5.09833	0.259469	3
Hopx	c1run3_34_X_nkx2.5.e9.5	2.11294	0.259469	3
Mef2c	c1run3_34_X_nkx2.5.e9.5	0	0.259469	3
Myocd	c1run3_34_X_nkx2.5.e9.5	0	0.259469	3
Smyd1	c1run3_34_X_nkx2.5.e9.5	0	0.259469	3
Tbx20	c1run3_34_X_nkx2.5.e9.5	0	0.259469	3
Dnmt3b	c1run3_34_X_nkx2.5.e9.5	5.232	0.259469	3
Gata2	c1run3_34_X_nkx2.5.e9.5	5.71558	0.259469	3
Gata3	c1run3_34_X_nkx2.5.e9.5	0	0.259469	3
Hand1	c1run3_34_X_nkx2.5.e9.5	0	0.259469	3
Msx1	c1run3_34_X_nkx2.5.e9.5	9.86449	0.259469	3
Nkx2-5	c1run3_35_X_nkx2.5.e9.5	0	0.259493	3
Ankrd1	c1run3_35_X_nkx2.5.e9.5	0	0.259493	3
Cdkn2d	c1run3_35_X_nkx2.5.e9.5	2.19323	0.259493	3
Hopx	c1run3_35_X_nkx2.5.e9.5	0	0.259493	3
Mef2c	c1run3_35_X_nkx2.5.e9.5	5.86227	0.259493	3
Myocd	c1run3_35_X_nkx2.5.e9.5	0	0.259493	3
Smyd1	c1run3_35_X_nkx2.5.e9.5	0	0.259493	3
Tbx20	c1run3_35_X_nkx2.5.e9.5	0	0.259493	3
Dnmt3b	c1run3_35_X_nkx2.5.e9.5	3.02619	0.259493	3
Gata2	c1run3_35_X_nkx2.5.e9.5	0	0.259493	3
Gata3	c1run3_35_X_nkx2.5.e9.5	0	0.259493	3
Hand1	c1run3_35_X_nkx2.5.e9.5	0	0.259493	3
Msx1	c1run3_35_X_nkx2.5.e9.5	9.15267	0.259493	3
Nkx2-5	c1run3_36_X_nkx2.5.e9.5	4.39841	0.929427	2
Ankrd1	c1run3_36_X_nkx2.5.e9.5	8.04276	0.929427	2
Cdkn2d	c1run3_36_X_nkx2.5.e9.5	9.2413	0.929427	2
Hopx	c1run3_36_X_nkx2.5.e9.5	6.59707	0.929427	2
Mef2c	c1run3_36_X_nkx2.5.e9.5	2.03231	0.929427	2
Myocd	c1run3_36_X_nkx2.5.e9.5	7.43069	0.929427	2
Smyd1	c1run3_36_X_nkx2.5.e9.5	9.60129	0.929427	2
Tbx20	c1run3_36_X_nkx2.5.e9.5	0	0.929427	2
Dnmt3b	c1run3_36_X_nkx2.5.e9.5	0	0.929427	2
Gata2	c1run3_36_X_nkx2.5.e9.5	0	0.929427	2
Gata3	c1run3_36_X_nkx2.5.e9.5	0	0.929427	2
Hand1	c1run3_36_X_nkx2.5.e9.5	0	0.929427	2
Msx1	c1run3_36_X_nkx2.5.e9.5	9.05686	0.929427	2
Nkx2-5	c1run3_37_X_nkx2.5.e9.5	0	0.391317	2
Ankrd1	c1run3_37_X_nkx2.5.e9.5	0	0.391317	2
Cdkn2d	c1run3_37_X_nkx2.5.e9.5	7.48675	0.391317	2
Hopx	c1run3_37_X_nkx2.5.e9.5	4.9888	0.391317	2
Mef2c	c1run3_37_X_nkx2.5.e9.5	6.58071	0.391317	2
Myocd	c1run3_37_X_nkx2.5.e9.5	0	0.391317	2
Smyd1	c1run3_37_X_nkx2.5.e9.5	0	0.391317	2
Tbx20	c1run3_37_X_nkx2.5.e9.5	2.56569	0.391317	2
Dnmt3b	c1run3_37_X_nkx2.5.e9.5	0	0.391317	2
Gata2	c1run3_37_X_nkx2.5.e9.5	7.41577	0.391317	2
Gata3	c1run3_37_X_nkx2.5.e9.5	0	0.391317	2
Hand1	c1run3_37_X_nkx2.5.e9.5	1.15711	0.391317	2
Msx1	c1run3_37_X_nkx2.5.e9.5	0	0.391317	2
Nkx2-5	c1run3_39_X_nkx2.5.e9.5	2.90341	0.254859	3
Ankrd1	c1run3_39_X_nkx2.5.e9.5	2.08439	0.254859	3
Cdkn2d	c1run3_39_X_nkx2.5.e9.5	5.63269	0.254859	3
Hopx	c1run3_39_X_nkx2.5.e9.5	0	0.254859	3
Mef2c	c1run3_39_X_nkx2.5.e9.5	0	0.254859	3
Myocd	c1run3_39_X_nkx2.5.e9.5	0	0.254859	3
Smyd1	c1run3_39_X_nkx2.5.e9.5	3.42262	0.254859	3
Tbx20	c1run3_39_X_nkx2.5.e9.5	0	0.254859	3
Dnmt3b	c1run3_39_X_nkx2.5.e9.5	6.75424	0.254859	3
Gata2	c1run3_39_X_nkx2.5.e9.5	0	0.254859	3
Gata3	c1run3_39_X_nkx2.5.e9.5	0	0.254859	3
Hand1	c1run3_39_X_nkx2.5.e9.5	0	0.254859	3
Msx1	c1run3_39_X_nkx2.5.e9.5	9.16654	0.254859	3
Nkx2-5	c1run3_40_X_nkx2.5.e9.5	3.68273	0.570702	NA
Ankrd1	c1run3_40_X_nkx2.5.e9.5	4.75762	0.570702	NA
Cdkn2d	c1run3_40_X_nkx2.5.e9.5	7.71018	0.570702	NA
Hopx	c1run3_40_X_nkx2.5.e9.5	0	0.570702	NA
Mef2c	c1run3_40_X_nkx2.5.e9.5	8.95411	0.570702	NA
Myocd	c1run3_40_X_nkx2.5.e9.5	11.4562	0.570702	NA
Smyd1	c1run3_40_X_nkx2.5.e9.5	7.99099	0.570702	NA
Tbx20	c1run3_40_X_nkx2.5.e9.5	9.27408	0.570702	NA
Dnmt3b	c1run3_40_X_nkx2.5.e9.5	3.01879	0.570702	NA
Gata2	c1run3_40_X_nkx2.5.e9.5	8.33578	0.570702	NA
Gata3	c1run3_40_X_nkx2.5.e9.5	6.71705	0.570702	NA
Hand1	c1run3_40_X_nkx2.5.e9.5	4.8787	0.570702	NA
Msx1	c1run3_40_X_nkx2.5.e9.5	3.38862	0.570702	NA
Nkx2-5	c1run3_41_X_nkx2.5.e9.5	4.19343	0.257014	3
Ankrd1	c1run3_41_X_nkx2.5.e9.5	1.95703	0.257014	3
Cdkn2d	c1run3_41_X_nkx2.5.e9.5	3.80444	0.257014	3
Hopx	c1run3_41_X_nkx2.5.e9.5	0	0.257014	3
Mef2c	c1run3_41_X_nkx2.5.e9.5	1.95703	0.257014	3
Myocd	c1run3_41_X_nkx2.5.e9.5	0	0.257014	3
Smyd1	c1run3_41_X_nkx2.5.e9.5	6.84377	0.257014	3
Tbx20	c1run3_41_X_nkx2.5.e9.5	10.1507	0.257014	3
Dnmt3b	c1run3_41_X_nkx2.5.e9.5	8.45037	0.257014	3
Gata2	c1run3_41_X_nkx2.5.e9.5	5.72484	0.257014	3
Gata3	c1run3_41_X_nkx2.5.e9.5	5.21072	0.257014	3
Hand1	c1run3_41_X_nkx2.5.e9.5	0	0.257014	3
Msx1	c1run3_41_X_nkx2.5.e9.5	0	0.257014	3
Nkx2-5	c1run3_42_X_nkx2.5.e9.5	0	0.26239	3
Ankrd1	c1run3_42_X_nkx2.5.e9.5	1.23578	0.26239	3
Cdkn2d	c1run3_42_X_nkx2.5.e9.5	0	0.26239	3
Hopx	c1run3_42_X_nkx2.5.e9.5	0	0.26239	3
Mef2c	c1run3_42_X_nkx2.5.e9.5	0	0.26239	3
Myocd	c1run3_42_X_nkx2.5.e9.5	0	0.26239	3
Smyd1	c1run3_42_X_nkx2.5.e9.5	0	0.26239	3
Tbx20	c1run3_42_X_nkx2.5.e9.5	0	0.26239	3
Dnmt3b	c1run3_42_X_nkx2.5.e9.5	8.68507	0.26239	3
Gata2	c1run3_42_X_nkx2.5.e9.5	0	0.26239	3
Gata3	c1run3_42_X_nkx2.5.e9.5	0	0.26239	3
Hand1	c1run3_42_X_nkx2.5.e9.5	0	0.26239	3
Msx1	c1run3_42_X_nkx2.5.e9.5	0	0.26239	3
Nkx2-5	c1run3_43_X_nkx2.5.e9.5	3.47576	0.26773	NA
Ankrd1	c1run3_43_X_nkx2.5.e9.5	1.2907	0.26773	NA
Cdkn2d	c1run3_43_X_nkx2.5.e9.5	0	0.26773	NA
Hopx	c1run3_43_X_nkx2.5.e9.5	0	0.26773	NA
Mef2c	c1run3_43_X_nkx2.5.e9.5	3.47576	0.26773	NA
Myocd	c1run3_43_X_nkx2.5.e9.5	0	0.26773	NA
Smyd1	c1run3_43_X_nkx2.5.e9.5	0	0.26773	NA
Tbx20	c1run3_43_X_nkx2.5.e9.5	0	0.26773	NA
Dnmt3b	c1run3_43_X_nkx2.5.e9.5	8.31186	0.26773	NA
Gata2	c1run3_43_X_nkx2.5.e9.5	0	0.26773	NA
Gata3	c1run3_43_X_nkx2.5.e9.5	1.96085	0.26773	NA
Hand1	c1run3_43_X_nkx2.5.e9.5	1.2907	0.26773	NA
Msx1	c1run3_43_X_nkx2.5.e9.5	6.90219	0.26773	NA
Nkx2-5	c1run3_46_X_nkx2.5.e9.5	0	0.246519	3
Ankrd1	c1run3_46_X_nkx2.5.e9.5	1.57032	0.246519	3
Cdkn2d	c1run3_46_X_nkx2.5.e9.5	7.525	0.246519	3
Hopx	c1run3_46_X_nkx2.5.e9.5	0	0.246519	3
Mef2c	c1run3_46_X_nkx2.5.e9.5	0	0.246519	3
Myocd	c1run3_46_X_nkx2.5.e9.5	0	0.246519	3
Smyd1	c1run3_46_X_nkx2.5.e9.5	1.57032	0.246519	3
Tbx20	c1run3_46_X_nkx2.5.e9.5	2.30434	0.246519	3
Dnmt3b	c1run3_46_X_nkx2.5.e9.5	6.71966	0.246519	3
Gata2	c1run3_46_X_nkx2.5.e9.5	0	0.246519	3
Gata3	c1run3_46_X_nkx2.5.e9.5	0	0.246519	3
Hand1	c1run3_46_X_nkx2.5.e9.5	0	0.246519	3
Msx1	c1run3_46_X_nkx2.5.e9.5	9.57234	0.246519	3
Nkx2-5	c1run3_47_X_nkx2.5.e9.5	6.0131	0.280982	3
Ankrd1	c1run3_47_X_nkx2.5.e9.5	0	0.280982	3
Cdkn2d	c1run3_47_X_nkx2.5.e9.5	0	0.280982	3
Hopx	c1run3_47_X_nkx2.5.e9.5	0	0.280982	3
Mef2c	c1run3_47_X_nkx2.5.e9.5	0	0.280982	3
Myocd	c1run3_47_X_nkx2.5.e9.5	0	0.280982	3
Smyd1	c1run3_47_X_nkx2.5.e9.5	3.88973	0.280982	3
Tbx20	c1run3_47_X_nkx2.5.e9.5	0	0.280982	3
Dnmt3b	c1run3_47_X_nkx2.5.e9.5	1.91247	0.280982	3
Gata2	c1run3_47_X_nkx2.5.e9.5	0	0.280982	3
Gata3	c1run3_47_X_nkx2.5.e9.5	4.34707	0.280982	3
Hand1	c1run3_47_X_nkx2.5.e9.5	6.72862	0.280982	3
Msx1	c1run3_47_X_nkx2.5.e9.5	4.53083	0.280982	3
Nkx2-5	c1run3_51_X_nkx2.5.e9.5	5.19572	0.268477	3
Ankrd1	c1run3_51_X_nkx2.5.e9.5	5.63264	0.268477	3
Cdkn2d	c1run3_51_X_nkx2.5.e9.5	7.91183	0.268477	3
Hopx	c1run3_51_X_nkx2.5.e9.5	0	0.268477	3
Mef2c	c1run3_51_X_nkx2.5.e9.5	3.96198	0.268477	3
Myocd	c1run3_51_X_nkx2.5.e9.5	0	0.268477	3
Smyd1	c1run3_51_X_nkx2.5.e9.5	0	0.268477	3
Tbx20	c1run3_51_X_nkx2.5.e9.5	1.3898	0.268477	3
Dnmt3b	c1run3_51_X_nkx2.5.e9.5	0	0.268477	3
Gata2	c1run3_51_X_nkx2.5.e9.5	0	0.268477	3
Gata3	c1run3_51_X_nkx2.5.e9.5	0	0.268477	3
Hand1	c1run3_51_X_nkx2.5.e9.5	0	0.268477	3
Msx1	c1run3_51_X_nkx2.5.e9.5	0	0.268477	3
Nkx2-5	c1run3_52_X_nkx2.5.e9.5	7.35433	0.966791	2
Ankrd1	c1run3_52_X_nkx2.5.e9.5	11.7839	0.966791	2
Cdkn2d	c1run3_52_X_nkx2.5.e9.5	6.57095	0.966791	2
Hopx	c1run3_52_X_nkx2.5.e9.5	1.37543	0.966791	2
Mef2c	c1run3_52_X_nkx2.5.e9.5	10.4173	0.966791	2
Myocd	c1run3_52_X_nkx2.5.e9.5	9.13506	0.966791	2
Smyd1	c1run3_52_X_nkx2.5.e9.5	7.56335	0.966791	2
Tbx20	c1run3_52_X_nkx2.5.e9.5	10.7928	0.966791	2
Dnmt3b	c1run3_52_X_nkx2.5.e9.5	2.5319	0.966791	2
Gata2	c1run3_52_X_nkx2.5.e9.5	0	0.966791	2
Gata3	c1run3_52_X_nkx2.5.e9.5	0	0.966791	2
Hand1	c1run3_52_X_nkx2.5.e9.5	0	0.966791	2
Msx1	c1run3_52_X_nkx2.5.e9.5	1.37543	0.966791	2
Nkx2-5	c1run3_53_X_nkx2.5.e9.5	2.29062	0.273284	3
Ankrd1	c1run3_53_X_nkx2.5.e9.5	2.62999	0.273284	3
Cdkn2d	c1run3_53_X_nkx2.5.e9.5	0	0.273284	3
Hopx	c1run3_53_X_nkx2.5.e9.5	0	0.273284	3
Mef2c	c1run3_53_X_nkx2.5.e9.5	0	0.273284	3
Myocd	c1run3_53_X_nkx2.5.e9.5	0	0.273284	3
Smyd1	c1run3_53_X_nkx2.5.e9.5	2.29062	0.273284	3
Tbx20	c1run3_53_X_nkx2.5.e9.5	0	0.273284	3
Dnmt3b	c1run3_53_X_nkx2.5.e9.5	6.04172	0.273284	3
Gata2	c1run3_53_X_nkx2.5.e9.5	0	0.273284	3
Gata3	c1run3_53_X_nkx2.5.e9.5	0	0.273284	3
Hand1	c1run3_53_X_nkx2.5.e9.5	7.04497	0.273284	3
Msx1	c1run3_53_X_nkx2.5.e9.5	0	0.273284	3
Nkx2-5	c1run3_54_X_nkx2.5.e9.5	4.77768	0.799678	2
Ankrd1	c1run3_54_X_nkx2.5.e9.5	10.7802	0.799678	2
Cdkn2d	c1run3_54_X_nkx2.5.e9.5	5.69966	0.799678	2
Hopx	c1run3_54_X_nkx2.5.e9.5	0	0.799678	2
Mef2c	c1run3_54_X_nkx2.5.e9.5	10.7282	0.799678	2
Myocd	c1run3_54_X_nkx2.5.e9.5	9.17663	0.799678	2
Smyd1	c1run3_54_X_nkx2.5.e9.5	6.51754	0.799678	2
Tbx20	c1run3_54_X_nkx2.5.e9.5	8.72107	0.799678	2
Dnmt3b	c1run3_54_X_nkx2.5.e9.5	0	0.799678	2
Gata2	c1run3_54_X_nkx2.5.e9.5	0	0.799678	2
Gata3	c1run3_54_X_nkx2.5.e9.5	0	0.799678	2
Hand1	c1run3_54_X_nkx2.5.e9.5	0	0.799678	2
Msx1	c1run3_54_X_nkx2.5.e9.5	0	0.799678	2
Nkx2-5	c1run3_55_X_nkx2.5.e9.5	3.92349	0.272601	3
Ankrd1	c1run3_55_X_nkx2.5.e9.5	2.2826	0.272601	3
Cdkn2d	c1run3_55_X_nkx2.5.e9.5	0	0.272601	3
Hopx	c1run3_55_X_nkx2.5.e9.5	3.12616	0.272601	3
Mef2c	c1run3_55_X_nkx2.5.e9.5	6.05992	0.272601	3
Myocd	c1run3_55_X_nkx2.5.e9.5	0	0.272601	3
Smyd1	c1run3_55_X_nkx2.5.e9.5	1.19441	0.272601	3
Tbx20	c1run3_55_X_nkx2.5.e9.5	0	0.272601	3
Dnmt3b	c1run3_55_X_nkx2.5.e9.5	6.91731	0.272601	3
Gata2	c1run3_55_X_nkx2.5.e9.5	7.76467	0.272601	3
Gata3	c1run3_55_X_nkx2.5.e9.5	3.32475	0.272601	3
Hand1	c1run3_55_X_nkx2.5.e9.5	0	0.272601	3
Msx1	c1run3_55_X_nkx2.5.e9.5	0	0.272601	3
Nkx2-5	c1run3_57_X_nkx2.5.e9.5	2.28163	0.887242	2
Ankrd1	c1run3_57_X_nkx2.5.e9.5	9.17435	0.887242	2
Cdkn2d	c1run3_57_X_nkx2.5.e9.5	9.20614	0.887242	2
Hopx	c1run3_57_X_nkx2.5.e9.5	0	0.887242	2
Mef2c	c1run3_57_X_nkx2.5.e9.5	8.8911	0.887242	2
Myocd	c1run3_57_X_nkx2.5.e9.5	10.9025	0.887242	2
Smyd1	c1run3_57_X_nkx2.5.e9.5	7.87052	0.887242	2
Tbx20	c1run3_57_X_nkx2.5.e9.5	8.94861	0.887242	2
Dnmt3b	c1run3_57_X_nkx2.5.e9.5	0	0.887242	2
Gata2	c1run3_57_X_nkx2.5.e9.5	0	0.887242	2
Gata3	c1run3_57_X_nkx2.5.e9.5	3.65385	0.887242	2
Hand1	c1run3_57_X_nkx2.5.e9.5	0	0.887242	2
Msx1	c1run3_57_X_nkx2.5.e9.5	1.83788	0.887242	2
Nkx2-5	c1run3_58_X_nkx2.5.e9.5	0	0.260267	3
Ankrd1	c1run3_58_X_nkx2.5.e9.5	2.05796	0.260267	3
Cdkn2d	c1run3_58_X_nkx2.5.e9.5	0	0.260267	3
Hopx	c1run3_58_X_nkx2.5.e9.5	0	0.260267	3
Mef2c	c1run3_58_X_nkx2.5.e9.5	3.92959	0.260267	3
Myocd	c1run3_58_X_nkx2.5.e9.5	0	0.260267	3
Smyd1	c1run3_58_X_nkx2.5.e9.5	3.39121	0.260267	3
Tbx20	c1run3_58_X_nkx2.5.e9.5	7.95297	0.260267	3
Dnmt3b	c1run3_58_X_nkx2.5.e9.5	8.19804	0.260267	3
Gata2	c1run3_58_X_nkx2.5.e9.5	3.59382	0.260267	3
Gata3	c1run3_58_X_nkx2.5.e9.5	0	0.260267	3
Hand1	c1run3_58_X_nkx2.5.e9.5	1.36848	0.260267	3
Msx1	c1run3_58_X_nkx2.5.e9.5	5.64506	0.260267	3
Nkx2-5	c1run3_59_X_nkx2.5.e9.5	0	0.78433	2
Ankrd1	c1run3_59_X_nkx2.5.e9.5	10.2656	0.78433	2
Cdkn2d	c1run3_59_X_nkx2.5.e9.5	4.13928	0.78433	2
Hopx	c1run3_59_X_nkx2.5.e9.5	4.02117	0.78433	2
Mef2c	c1run3_59_X_nkx2.5.e9.5	11.5718	0.78433	2
Myocd	c1run3_59_X_nkx2.5.e9.5	10.2278	0.78433	2
Smyd1	c1run3_59_X_nkx2.5.e9.5	9.26354	0.78433	2
Tbx20	c1run3_59_X_nkx2.5.e9.5	7.67677	0.78433	2
Dnmt3b	c1run3_59_X_nkx2.5.e9.5	0	0.78433	2
Gata2	c1run3_59_X_nkx2.5.e9.5	7.91067	0.78433	2
Gata3	c1run3_59_X_nkx2.5.e9.5	6.55158	0.78433	2
Hand1	c1run3_59_X_nkx2.5.e9.5	5.15496	0.78433	2
Msx1	c1run3_59_X_nkx2.5.e9.5	5.15496	0.78433	2
Nkx2-5	c1run3_60_X_nkx2.5.e9.5	3.89136	0.271214	3
Ankrd1	c1run3_60_X_nkx2.5.e9.5	0	0.271214	3
Cdkn2d	c1run3_60_X_nkx2.5.e9.5	0	0.271214	3
Hopx	c1run3_60_X_nkx2.5.e9.5	0	0.271214	3
Mef2c	c1run3_60_X_nkx2.5.e9.5	7.69079	0.271214	3
Myocd	c1run3_60_X_nkx2.5.e9.5	0	0.271214	3
Smyd1	c1run3_60_X_nkx2.5.e9.5	8.48723	0.271214	3
Tbx20	c1run3_60_X_nkx2.5.e9.5	0	0.271214	3
Dnmt3b	c1run3_60_X_nkx2.5.e9.5	5.02826	0.271214	3
Gata2	c1run3_60_X_nkx2.5.e9.5	7.71814	0.271214	3
Gata3	c1run3_60_X_nkx2.5.e9.5	7.85994	0.271214	3
Hand1	c1run3_60_X_nkx2.5.e9.5	0	0.271214	3
Msx1	c1run3_60_X_nkx2.5.e9.5	0	0.271214	3
Nkx2-5	c1run3_61_X_nkx2.5.e9.5	0	0.634324	2
Ankrd1	c1run3_61_X_nkx2.5.e9.5	10.1161	0.634324	2
Cdkn2d	c1run3_61_X_nkx2.5.e9.5	4.15382	0.634324	2
Hopx	c1run3_61_X_nkx2.5.e9.5	0	0.634324	2
Mef2c	c1run3_61_X_nkx2.5.e9.5	9.99916	0.634324	2
Myocd	c1run3_61_X_nkx2.5.e9.5	7.2036	0.634324	2
Smyd1	c1run3_61_X_nkx2.5.e9.5	4.49826	0.634324	2
Tbx20	c1run3_61_X_nkx2.5.e9.5	8.08853	0.634324	2
Dnmt3b	c1run3_61_X_nkx2.5.e9.5	7.96925	0.634324	2
Gata2	c1run3_61_X_nkx2.5.e9.5	0	0.634324	2
Gata3	c1run3_61_X_nkx2.5.e9.5	0	0.634324	2
Hand1	c1run3_61_X_nkx2.5.e9.5	0	0.634324	2
Msx1	c1run3_61_X_nkx2.5.e9.5	0	0.634324	2
Nkx2-5	c1run3_62_X_nkx2.5.e9.5	3.45585	0.261432	3
Ankrd1	c1run3_62_X_nkx2.5.e9.5	2.31877	0.261432	3
Cdkn2d	c1run3_62_X_nkx2.5.e9.5	0	0.261432	3
Hopx	c1run3_62_X_nkx2.5.e9.5	1.58233	0.261432	3
Mef2c	c1run3_62_X_nkx2.5.e9.5	1.58233	0.261432	3
Myocd	c1run3_62_X_nkx2.5.e9.5	0	0.261432	3
Smyd1	c1run3_62_X_nkx2.5.e9.5	0	0.261432	3
Tbx20	c1run3_62_X_nkx2.5.e9.5	0	0.261432	3
Dnmt3b	c1run3_62_X_nkx2.5.e9.5	6.79051	0.261432	3
Gata2	c1run3_62_X_nkx2.5.e9.5	0	0.261432	3
Gata3	c1run3_62_X_nkx2.5.e9.5	0	0.261432	3
Hand1	c1run3_62_X_nkx2.5.e9.5	0	0.261432	3
Msx1	c1run3_62_X_nkx2.5.e9.5	5.72405	0.261432	3
Nkx2-5	c1run3_63_X_nkx2.5.e9.5	0	0.272247	3
Ankrd1	c1run3_63_X_nkx2.5.e9.5	2.32595	0.272247	3
Cdkn2d	c1run3_63_X_nkx2.5.e9.5	0	0.272247	3
Hopx	c1run3_63_X_nkx2.5.e9.5	0	0.272247	3
Mef2c	c1run3_63_X_nkx2.5.e9.5	7.94164	0.272247	3
Myocd	c1run3_63_X_nkx2.5.e9.5	0	0.272247	3
Smyd1	c1run3_63_X_nkx2.5.e9.5	0	0.272247	3
Tbx20	c1run3_63_X_nkx2.5.e9.5	0	0.272247	3
Dnmt3b	c1run3_63_X_nkx2.5.e9.5	0	0.272247	3
Gata2	c1run3_63_X_nkx2.5.e9.5	8.97943	0.272247	3
Gata3	c1run3_63_X_nkx2.5.e9.5	4.75973	0.272247	3
Hand1	c1run3_63_X_nkx2.5.e9.5	7.50485	0.272247	3
Msx1	c1run3_63_X_nkx2.5.e9.5	6.92385	0.272247	3
Nkx2-5	c1run3_65_X_nkx2.5.e9.5	3.55629	0.260009	3
Ankrd1	c1run3_65_X_nkx2.5.e9.5	0	0.260009	3
Cdkn2d	c1run3_65_X_nkx2.5.e9.5	0	0.260009	3
Hopx	c1run3_65_X_nkx2.5.e9.5	0	0.260009	3
Mef2c	c1run3_65_X_nkx2.5.e9.5	1.48232	0.260009	3
Myocd	c1run3_65_X_nkx2.5.e9.5	0	0.260009	3
Smyd1	c1run3_65_X_nkx2.5.e9.5	0	0.260009	3
Tbx20	c1run3_65_X_nkx2.5.e9.5	0	0.260009	3
Dnmt3b	c1run3_65_X_nkx2.5.e9.5	8.96499	0.260009	3
Gata2	c1run3_65_X_nkx2.5.e9.5	0	0.260009	3
Gata3	c1run3_65_X_nkx2.5.e9.5	0	0.260009	3
Hand1	c1run3_65_X_nkx2.5.e9.5	1.48232	0.260009	3
Msx1	c1run3_65_X_nkx2.5.e9.5	4.80269	0.260009	3
Nkx2-5	c1run3_67_X_nkx2.5.e9.5	1.70133	0.986952	2
Ankrd1	c1run3_67_X_nkx2.5.e9.5	9.20708	0.986952	2
Cdkn2d	c1run3_67_X_nkx2.5.e9.5	8.37524	0.986952	2
Hopx	c1run3_67_X_nkx2.5.e9.5	6.05112	0.986952	2
Mef2c	c1run3_67_X_nkx2.5.e9.5	8.24207	0.986952	2
Myocd	c1run3_67_X_nkx2.5.e9.5	9.84521	0.986952	2
Smyd1	c1run3_67_X_nkx2.5.e9.5	9.27158	0.986952	2
Tbx20	c1run3_67_X_nkx2.5.e9.5	5.29587	0.986952	2
Dnmt3b	c1run3_67_X_nkx2.5.e9.5	0	0.986952	2
Gata2	c1run3_67_X_nkx2.5.e9.5	0	0.986952	2
Gata3	c1run3_67_X_nkx2.5.e9.5	0	0.986952	2
Hand1	c1run3_67_X_nkx2.5.e9.5	0	0.986952	2
Msx1	c1run3_67_X_nkx2.5.e9.5	1.70133	0.986952	2
Nkx2-5	c1run3_69_X_nkx2.5.e9.5	1.79951	0.233907	3
Ankrd1	c1run3_69_X_nkx2.5.e9.5	1.79951	0.233907	3
Cdkn2d	c1run3_69_X_nkx2.5.e9.5	0	0.233907	3
Hopx	c1run3_69_X_nkx2.5.e9.5	4.82229	0.233907	3
Mef2c	c1run3_69_X_nkx2.5.e9.5	0	0.233907	3
Myocd	c1run3_69_X_nkx2.5.e9.5	0	0.233907	3
Smyd1	c1run3_69_X_nkx2.5.e9.5	0	0.233907	3
Tbx20	c1run3_69_X_nkx2.5.e9.5	0	0.233907	3
Dnmt3b	c1run3_69_X_nkx2.5.e9.5	6.58978	0.233907	3
Gata2	c1run3_69_X_nkx2.5.e9.5	8.09757	0.233907	3
Gata3	c1run3_69_X_nkx2.5.e9.5	3.74471	0.233907	3
Hand1	c1run3_69_X_nkx2.5.e9.5	0	0.233907	3
Msx1	c1run3_69_X_nkx2.5.e9.5	0	0.233907	3
Nkx2-5	c1run3_70_X_nkx2.5.e9.5	3.10176	0.513094	NA
Ankrd1	c1run3_70_X_nkx2.5.e9.5	1.33167	0.513094	NA
Cdkn2d	c1run3_70_X_nkx2.5.e9.5	1.33167	0.513094	NA
Hopx	c1run3_70_X_nkx2.5.e9.5	2.01216	0.513094	NA
Mef2c	c1run3_70_X_nkx2.5.e9.5	10.5822	0.513094	NA
Myocd	c1run3_70_X_nkx2.5.e9.5	9.48886	0.513094	NA
Smyd1	c1run3_70_X_nkx2.5.e9.5	9.8648	0.513094	NA
Tbx20	c1run3_70_X_nkx2.5.e9.5	0	0.513094	NA
Dnmt3b	c1run3_70_X_nkx2.5.e9.5	2.47269	0.513094	NA
Gata2	c1run3_70_X_nkx2.5.e9.5	0	0.513094	NA
Gata3	c1run3_70_X_nkx2.5.e9.5	2.01216	0.513094	NA
Hand1	c1run3_70_X_nkx2.5.e9.5	0	0.513094	NA
Msx1	c1run3_70_X_nkx2.5.e9.5	1.33167	0.513094	NA
Nkx2-5	c1run3_73_X_nkx2.5.e9.5	0	0.2663	3
Ankrd1	c1run3_73_X_nkx2.5.e9.5	0	0.2663	3
Cdkn2d	c1run3_73_X_nkx2.5.e9.5	8.13516	0.2663	3
Hopx	c1run3_73_X_nkx2.5.e9.5	0	0.2663	3
Mef2c	c1run3_73_X_nkx2.5.e9.5	8.62794	0.2663	3
Myocd	c1run3_73_X_nkx2.5.e9.5	2.00443	0.2663	3
Smyd1	c1run3_73_X_nkx2.5.e9.5	0	0.2663	3
Tbx20	c1run3_73_X_nkx2.5.e9.5	0	0.2663	3
Dnmt3b	c1run3_73_X_nkx2.5.e9.5	0	0.2663	3
Gata2	c1run3_73_X_nkx2.5.e9.5	0	0.2663	3
Gata3	c1run3_73_X_nkx2.5.e9.5	0	0.2663	3
Hand1	c1run3_73_X_nkx2.5.e9.5	0	0.2663	3
Msx1	c1run3_73_X_nkx2.5.e9.5	2.00443	0.2663	3
Nkx2-5	c1run3_74_X_nkx2.5.e9.5	0	0.262298	3
Ankrd1	c1run3_74_X_nkx2.5.e9.5	0	0.262298	3
Cdkn2d	c1run3_74_X_nkx2.5.e9.5	7.16538	0.262298	3
Hopx	c1run3_74_X_nkx2.5.e9.5	4.0737	0.262298	3
Mef2c	c1run3_74_X_nkx2.5.e9.5	5.81852	0.262298	3
Myocd	c1run3_74_X_nkx2.5.e9.5	0	0.262298	3
Smyd1	c1run3_74_X_nkx2.5.e9.5	0	0.262298	3
Tbx20	c1run3_74_X_nkx2.5.e9.5	3.15693	0.262298	3
Dnmt3b	c1run3_74_X_nkx2.5.e9.5	5.81852	0.262298	3
Gata2	c1run3_74_X_nkx2.5.e9.5	0	0.262298	3
Gata3	c1run3_74_X_nkx2.5.e9.5	0	0.262298	3
Hand1	c1run3_74_X_nkx2.5.e9.5	0	0.262298	3
Msx1	c1run3_74_X_nkx2.5.e9.5	8.38202	0.262298	3
Nkx2-5	c1run3_75_X_nkx2.5.e9.5	1.98226	0.273	3
Ankrd1	c1run3_75_X_nkx2.5.e9.5	6.04274	0.273	3
Cdkn2d	c1run3_75_X_nkx2.5.e9.5	0	0.273	3
Hopx	c1run3_75_X_nkx2.5.e9.5	0	0.273	3
Mef2c	c1run3_75_X_nkx2.5.e9.5	0	0.273	3
Myocd	c1run3_75_X_nkx2.5.e9.5	0	0.273	3
Smyd1	c1run3_75_X_nkx2.5.e9.5	6.822	0.273	3
Tbx20	c1run3_75_X_nkx2.5.e9.5	0	0.273	3
Dnmt3b	c1run3_75_X_nkx2.5.e9.5	6.78387	0.273	3
Gata2	c1run3_75_X_nkx2.5.e9.5	0	0.273	3
Gata3	c1run3_75_X_nkx2.5.e9.5	0	0.273	3
Hand1	c1run3_75_X_nkx2.5.e9.5	4.93126	0.273	3
Msx1	c1run3_75_X_nkx2.5.e9.5	8.64169	0.273	3
Nkx2-5	c1run3_76_X_nkx2.5.e9.5	3.67342	0.278766	3
Ankrd1	c1run3_76_X_nkx2.5.e9.5	2.91316	0.278766	3
Cdkn2d	c1run3_76_X_nkx2.5.e9.5	0	0.278766	3
Hopx	c1run3_76_X_nkx2.5.e9.5	0	0.278766	3
Mef2c	c1run3_76_X_nkx2.5.e9.5	10.4502	0.278766	3
Myocd	c1run3_76_X_nkx2.5.e9.5	2.63834	0.278766	3
Smyd1	c1run3_76_X_nkx2.5.e9.5	1.85323	0.278766	3
Tbx20	c1run3_76_X_nkx2.5.e9.5	0	0.278766	3
Dnmt3b	c1run3_76_X_nkx2.5.e9.5	6.98217	0.278766	3
Gata2	c1run3_76_X_nkx2.5.e9.5	0	0.278766	3
Gata3	c1run3_76_X_nkx2.5.e9.5	0	0.278766	3
Hand1	c1run3_76_X_nkx2.5.e9.5	0	0.278766	3
Msx1	c1run3_76_X_nkx2.5.e9.5	0	0.278766	3
Nkx2-5	c1run3_78_X_nkx2.5.e9.5	0	0.259094	3
Ankrd1	c1run3_78_X_nkx2.5.e9.5	2.30271	0.259094	3
Cdkn2d	c1run3_78_X_nkx2.5.e9.5	0	0.259094	3
Hopx	c1run3_78_X_nkx2.5.e9.5	0	0.259094	3
Mef2c	c1run3_78_X_nkx2.5.e9.5	0	0.259094	3
Myocd	c1run3_78_X_nkx2.5.e9.5	0	0.259094	3
Smyd1	c1run3_78_X_nkx2.5.e9.5	0	0.259094	3
Tbx20	c1run3_78_X_nkx2.5.e9.5	8.39807	0.259094	3
Dnmt3b	c1run3_78_X_nkx2.5.e9.5	0	0.259094	3
Gata2	c1run3_78_X_nkx2.5.e9.5	0	0.259094	3
Gata3	c1run3_78_X_nkx2.5.e9.5	0	0.259094	3
Hand1	c1run3_78_X_nkx2.5.e9.5	8.38115	0.259094	3
Msx1	c1run3_78_X_nkx2.5.e9.5	0	0.259094	3
Nkx2-5	c1run3_79_X_nkx2.5.e9.5	2.91248	0.541984	NA
Ankrd1	c1run3_79_X_nkx2.5.e9.5	9.27907	0.541984	NA
Cdkn2d	c1run3_79_X_nkx2.5.e9.5	2.91248	0.541984	NA
Hopx	c1run3_79_X_nkx2.5.e9.5	0	0.541984	NA
Mef2c	c1run3_79_X_nkx2.5.e9.5	10.0481	0.541984	NA
Myocd	c1run3_79_X_nkx2.5.e9.5	11.1601	0.541984	NA
Smyd1	c1run3_79_X_nkx2.5.e9.5	0	0.541984	NA
Tbx20	c1run3_79_X_nkx2.5.e9.5	8.61746	0.541984	NA
Dnmt3b	c1run3_79_X_nkx2.5.e9.5	0	0.541984	NA
Gata2	c1run3_79_X_nkx2.5.e9.5	0	0.541984	NA
Gata3	c1run3_79_X_nkx2.5.e9.5	0	0.541984	NA
Hand1	c1run3_79_X_nkx2.5.e9.5	0	0.541984	NA
Msx1	c1run3_79_X_nkx2.5.e9.5	0	0.541984	NA
Nkx2-5	c1run3_81_X_nkx2.5.e9.5	2.22784	0.260203	3
Ankrd1	c1run3_81_X_nkx2.5.e9.5	0	0.260203	3
Cdkn2d	c1run3_81_X_nkx2.5.e9.5	3.97612	0.260203	3
Hopx	c1run3_81_X_nkx2.5.e9.5	0	0.260203	3
Mef2c	c1run3_81_X_nkx2.5.e9.5	0	0.260203	3
Myocd	c1run3_81_X_nkx2.5.e9.5	0	0.260203	3
Smyd1	c1run3_81_X_nkx2.5.e9.5	0	0.260203	3
Tbx20	c1run3_81_X_nkx2.5.e9.5	0	0.260203	3
Dnmt3b	c1run3_81_X_nkx2.5.e9.5	8.71772	0.260203	3
Gata2	c1run3_81_X_nkx2.5.e9.5	0	0.260203	3
Gata3	c1run3_81_X_nkx2.5.e9.5	0	0.260203	3
Hand1	c1run3_81_X_nkx2.5.e9.5	0	0.260203	3
Msx1	c1run3_81_X_nkx2.5.e9.5	0	0.260203	3
Nkx2-5	c1run3_82_X_nkx2.5.e9.5	1.41899	0.524352	2
Ankrd1	c1run3_82_X_nkx2.5.e9.5	11.096	0.524352	2
Cdkn2d	c1run3_82_X_nkx2.5.e9.5	0	0.524352	2
Hopx	c1run3_82_X_nkx2.5.e9.5	4.00592	0.524352	2
Mef2c	c1run3_82_X_nkx2.5.e9.5	11.4895	0.524352	2
Myocd	c1run3_82_X_nkx2.5.e9.5	9.98072	0.524352	2
Smyd1	c1run3_82_X_nkx2.5.e9.5	7.49278	0.524352	2
Tbx20	c1run3_82_X_nkx2.5.e9.5	7.32218	0.524352	2
Dnmt3b	c1run3_82_X_nkx2.5.e9.5	7.54544	0.524352	2
Gata2	c1run3_82_X_nkx2.5.e9.5	0	0.524352	2
Gata3	c1run3_82_X_nkx2.5.e9.5	0	0.524352	2
Hand1	c1run3_82_X_nkx2.5.e9.5	0	0.524352	2
Msx1	c1run3_82_X_nkx2.5.e9.5	2.12033	0.524352	2
Nkx2-5	c1run3_83_X_nkx2.5.e9.5	2.25023	0.276299	3
Ankrd1	c1run3_83_X_nkx2.5.e9.5	1.52546	0.276299	3
Cdkn2d	c1run3_83_X_nkx2.5.e9.5	6.73081	0.276299	3
Hopx	c1run3_83_X_nkx2.5.e9.5	0	0.276299	3
Mef2c	c1run3_83_X_nkx2.5.e9.5	9.28281	0.276299	3
Myocd	c1run3_83_X_nkx2.5.e9.5	0	0.276299	3
Smyd1	c1run3_83_X_nkx2.5.e9.5	4.55738	0.276299	3
Tbx20	c1run3_83_X_nkx2.5.e9.5	0	0.276299	3
Dnmt3b	c1run3_83_X_nkx2.5.e9.5	3.61739	0.276299	3
Gata2	c1run3_83_X_nkx2.5.e9.5	0	0.276299	3
Gata3	c1run3_83_X_nkx2.5.e9.5	4.16262	0.276299	3
Hand1	c1run3_83_X_nkx2.5.e9.5	0	0.276299	3
Msx1	c1run3_83_X_nkx2.5.e9.5	0	0.276299	3
Nkx2-5	c1run3_84_X_nkx2.5.e9.5	2.33995	0.274489	3
Ankrd1	c1run3_84_X_nkx2.5.e9.5	0	0.274489	3
Cdkn2d	c1run3_84_X_nkx2.5.e9.5	8.8585	0.274489	3
Hopx	c1run3_84_X_nkx2.5.e9.5	0	0.274489	3
Mef2c	c1run3_84_X_nkx2.5.e9.5	6.86779	0.274489	3
Myocd	c1run3_84_X_nkx2.5.e9.5	0	0.274489	3
Smyd1	c1run3_84_X_nkx2.5.e9.5	4.66546	0.274489	3
Tbx20	c1run3_84_X_nkx2.5.e9.5	0	0.274489	3
Dnmt3b	c1run3_84_X_nkx2.5.e9.5	0	0.274489	3
Gata2	c1run3_84_X_nkx2.5.e9.5	0	0.274489	3
Gata3	c1run3_84_X_nkx2.5.e9.5	8.09388	0.274489	3
Hand1	c1run3_84_X_nkx2.5.e9.5	5.95287	0.274489	3
Msx1	c1run3_84_X_nkx2.5.e9.5	7.38869	0.274489	3
Nkx2-5	c1run3_85_X_nkx2.5.e9.5	3.16661	0.269321	3
Ankrd1	c1run3_85_X_nkx2.5.e9.5	2.65983	0.269321	3
Cdkn2d	c1run3_85_X_nkx2.5.e9.5	0	0.269321	3
Hopx	c1run3_85_X_nkx2.5.e9.5	0	0.269321	3
Mef2c	c1run3_85_X_nkx2.5.e9.5	7.79287	0.269321	3
Myocd	c1run3_85_X_nkx2.5.e9.5	2.65983	0.269321	3
Smyd1	c1run3_85_X_nkx2.5.e9.5	5.35392	0.269321	3
Tbx20	c1run3_85_X_nkx2.5.e9.5	0	0.269321	3
Dnmt3b	c1run3_85_X_nkx2.5.e9.5	5.95826	0.269321	3
Gata2	c1run3_85_X_nkx2.5.e9.5	0	0.269321	3
Gata3	c1run3_85_X_nkx2.5.e9.5	0	0.269321	3
Hand1	c1run3_85_X_nkx2.5.e9.5	0	0.269321	3
Msx1	c1run3_85_X_nkx2.5.e9.5	0	0.269321	3
Nkx2-5	c1run3_86_X_nkx2.5.e9.5	1.85187	0.245176	3
Ankrd1	c1run3_86_X_nkx2.5.e9.5	0	0.245176	3
Cdkn2d	c1run3_86_X_nkx2.5.e9.5	8.31914	0.245176	3
Hopx	c1run3_86_X_nkx2.5.e9.5	0	0.245176	3
Mef2c	c1run3_86_X_nkx2.5.e9.5	0	0.245176	3
Myocd	c1run3_86_X_nkx2.5.e9.5	0	0.245176	3
Smyd1	c1run3_86_X_nkx2.5.e9.5	0	0.245176	3
Tbx20	c1run3_86_X_nkx2.5.e9.5	0	0.245176	3
Dnmt3b	c1run3_86_X_nkx2.5.e9.5	8.3769	0.245176	3
Gata2	c1run3_86_X_nkx2.5.e9.5	0	0.245176	3
Gata3	c1run3_86_X_nkx2.5.e9.5	0	0.245176	3
Hand1	c1run3_86_X_nkx2.5.e9.5	0	0.245176	3
Msx1	c1run3_86_X_nkx2.5.e9.5	10.15	0.245176	3
Nkx2-5	c1run3_88_X_nkx2.5.e9.5	1.42537	0.516869	3
Ankrd1	c1run3_88_X_nkx2.5.e9.5	2.95296	0.516869	3
Cdkn2d	c1run3_88_X_nkx2.5.e9.5	7.10384	0.516869	3
Hopx	c1run3_88_X_nkx2.5.e9.5	6.69817	0.516869	3
Mef2c	c1run3_88_X_nkx2.5.e9.5	8.41591	0.516869	3
Myocd	c1run3_88_X_nkx2.5.e9.5	6.65054	0.516869	3
Smyd1	c1run3_88_X_nkx2.5.e9.5	7.97837	0.516869	3
Tbx20	c1run3_88_X_nkx2.5.e9.5	4.01548	0.516869	3
Dnmt3b	c1run3_88_X_nkx2.5.e9.5	1.42537	0.516869	3
Gata2	c1run3_88_X_nkx2.5.e9.5	0	0.516869	3
Gata3	c1run3_88_X_nkx2.5.e9.5	0	0.516869	3
Hand1	c1run3_88_X_nkx2.5.e9.5	0	0.516869	3
Msx1	c1run3_88_X_nkx2.5.e9.5	8.13365	0.516869	3
Nkx2-5	c1run3_91_X_nkx2.5.e9.5	4.16031	0.267256	3
Ankrd1	c1run3_91_X_nkx2.5.e9.5	0	0.267256	3
Cdkn2d	c1run3_91_X_nkx2.5.e9.5	1.57818	0.267256	3
Hopx	c1run3_91_X_nkx2.5.e9.5	4.07788	0.267256	3
Mef2c	c1run3_91_X_nkx2.5.e9.5	0	0.267256	3
Myocd	c1run3_91_X_nkx2.5.e9.5	0	0.267256	3
Smyd1	c1run3_91_X_nkx2.5.e9.5	0	0.267256	3
Tbx20	c1run3_91_X_nkx2.5.e9.5	0	0.267256	3
Dnmt3b	c1run3_91_X_nkx2.5.e9.5	0	0.267256	3
Gata2	c1run3_91_X_nkx2.5.e9.5	1.57818	0.267256	3
Gata3	c1run3_91_X_nkx2.5.e9.5	0	0.267256	3
Hand1	c1run3_91_X_nkx2.5.e9.5	0	0.267256	3
Msx1	c1run3_91_X_nkx2.5.e9.5	10.4297	0.267256	3
Nkx2-5	c1run3_92_X_nkx2.5.e9.5	3.57516	0.264427	3
Ankrd1	c1run3_92_X_nkx2.5.e9.5	1.89905	0.264427	3
Cdkn2d	c1run3_92_X_nkx2.5.e9.5	0	0.264427	3
Hopx	c1run3_92_X_nkx2.5.e9.5	0	0.264427	3
Mef2c	c1run3_92_X_nkx2.5.e9.5	0	0.264427	3
Myocd	c1run3_92_X_nkx2.5.e9.5	0	0.264427	3
Smyd1	c1run3_92_X_nkx2.5.e9.5	0	0.264427	3
Tbx20	c1run3_92_X_nkx2.5.e9.5	0	0.264427	3
Dnmt3b	c1run3_92_X_nkx2.5.e9.5	0	0.264427	3
Gata2	c1run3_92_X_nkx2.5.e9.5	0	0.264427	3
Gata3	c1run3_92_X_nkx2.5.e9.5	0	0.264427	3
Hand1	c1run3_92_X_nkx2.5.e9.5	0	0.264427	3
Msx1	c1run3_92_X_nkx2.5.e9.5	5.64773	0.264427	3
Nkx2-5	c1run3_93_X_nkx2.5.e9.5	0	0.242433	3
Ankrd1	c1run3_93_X_nkx2.5.e9.5	2.25765	0.242433	3
Cdkn2d	c1run3_93_X_nkx2.5.e9.5	7.75876	0.242433	3
Hopx	c1run3_93_X_nkx2.5.e9.5	0	0.242433	3
Mef2c	c1run3_93_X_nkx2.5.e9.5	5.27877	0.242433	3
Myocd	c1run3_93_X_nkx2.5.e9.5	0	0.242433	3
Smyd1	c1run3_93_X_nkx2.5.e9.5	0	0.242433	3
Tbx20	c1run3_93_X_nkx2.5.e9.5	0	0.242433	3
Dnmt3b	c1run3_93_X_nkx2.5.e9.5	6.18706	0.242433	3
Gata2	c1run3_93_X_nkx2.5.e9.5	0	0.242433	3
Gata3	c1run3_93_X_nkx2.5.e9.5	0	0.242433	3
Hand1	c1run3_93_X_nkx2.5.e9.5	0	0.242433	3
Msx1	c1run3_93_X_nkx2.5.e9.5	10.5783	0.242433	3
Nkx2-5	c1run3_94_X_nkx2.5.e9.5	0	0.256065	3
Ankrd1	c1run3_94_X_nkx2.5.e9.5	2.46716	0.256065	3
Cdkn2d	c1run3_94_X_nkx2.5.e9.5	0.811407	0.256065	3
Hopx	c1run3_94_X_nkx2.5.e9.5	0	0.256065	3
Mef2c	c1run3_94_X_nkx2.5.e9.5	0.811407	0.256065	3
Myocd	c1run3_94_X_nkx2.5.e9.5	0	0.256065	3
Smyd1	c1run3_94_X_nkx2.5.e9.5	0	0.256065	3
Tbx20	c1run3_94_X_nkx2.5.e9.5	0	0.256065	3
Dnmt3b	c1run3_94_X_nkx2.5.e9.5	0	0.256065	3
Gata2	c1run3_94_X_nkx2.5.e9.5	0	0.256065	3
Gata3	c1run3_94_X_nkx2.5.e9.5	0	0.256065	3
Hand1	c1run3_94_X_nkx2.5.e9.5	0	0.256065	3
Msx1	c1run3_94_X_nkx2.5.e9.5	2.81545	0.256065	3
Nkx2-5	c1run3_95_X_nkx2.5.e9.5	2.8145	0.265241	3
Ankrd1	c1run3_95_X_nkx2.5.e9.5	1.14205	0.265241	3
Cdkn2d	c1run3_95_X_nkx2.5.e9.5	6.76047	0.265241	3
Hopx	c1run3_95_X_nkx2.5.e9.5	0	0.265241	3
Mef2c	c1run3_95_X_nkx2.5.e9.5	0	0.265241	3
Myocd	c1run3_95_X_nkx2.5.e9.5	0	0.265241	3
Smyd1	c1run3_95_X_nkx2.5.e9.5	0	0.265241	3
Tbx20	c1run3_95_X_nkx2.5.e9.5	0	0.265241	3
Dnmt3b	c1run3_95_X_nkx2.5.e9.5	0	0.265241	3
Gata2	c1run3_95_X_nkx2.5.e9.5	0	0.265241	3
Gata3	c1run3_95_X_nkx2.5.e9.5	4.90529	0.265241	3
Hand1	c1run3_95_X_nkx2.5.e9.5	0	0.265241	3
Msx1	c1run3_95_X_nkx2.5.e9.5	0	0.265241	3
Nkx2-5	c1run3_96_X_nkx2.5.e9.5	2.12578	0.254416	3
Ankrd1	c1run3_96_X_nkx2.5.e9.5	2.12578	0.254416	3
Cdkn2d	c1run3_96_X_nkx2.5.e9.5	0	0.254416	3
Hopx	c1run3_96_X_nkx2.5.e9.5	0	0.254416	3
Mef2c	c1run3_96_X_nkx2.5.e9.5	2.59612	0.254416	3
Myocd	c1run3_96_X_nkx2.5.e9.5	0	0.254416	3
Smyd1	c1run3_96_X_nkx2.5.e9.5	0	0.254416	3
Tbx20	c1run3_96_X_nkx2.5.e9.5	0	0.254416	3
Dnmt3b	c1run3_96_X_nkx2.5.e9.5	0	0.254416	3
Gata2	c1run3_96_X_nkx2.5.e9.5	0	0.254416	3
Gata3	c1run3_96_X_nkx2.5.e9.5	5.73194	0.254416	3
Hand1	c1run3_96_X_nkx2.5.e9.5	0	0.254416	3
Msx1	c1run3_96_X_nkx2.5.e9.5	6.26113	0.254416	3
Nkx2-5	c1run4_06_X_nkx2.5.e7.5	0	0.17765	1
Ankrd1	c1run4_06_X_nkx2.5.e7.5	0	0.17765	1
Cdkn2d	c1run4_06_X_nkx2.5.e7.5	4.08131	0.17765	1
Hopx	c1run4_06_X_nkx2.5.e7.5	0	0.17765	1
Mef2c	c1run4_06_X_nkx2.5.e7.5	9.94982	0.17765	1
Myocd	c1run4_06_X_nkx2.5.e7.5	0	0.17765	1
Smyd1	c1run4_06_X_nkx2.5.e7.5	0	0.17765	1
Tbx20	c1run4_06_X_nkx2.5.e7.5	2.41789	0.17765	1
Dnmt3b	c1run4_06_X_nkx2.5.e7.5	9.10618	0.17765	1
Gata2	c1run4_06_X_nkx2.5.e7.5	7.02091	0.17765	1
Gata3	c1run4_06_X_nkx2.5.e7.5	3.59706	0.17765	1
Hand1	c1run4_06_X_nkx2.5.e7.5	8.05516	0.17765	1
Msx1	c1run4_06_X_nkx2.5.e7.5	4.6515	0.17765	1
Nkx2-5	c1run4_13_X_nkx2.5.e7.5	0	0.147219	1
Ankrd1	c1run4_13_X_nkx2.5.e7.5	0	0.147219	1
Cdkn2d	c1run4_13_X_nkx2.5.e7.5	0	0.147219	1
Hopx	c1run4_13_X_nkx2.5.e7.5	1.19839	0.147219	1
Mef2c	c1run4_13_X_nkx2.5.e7.5	0	0.147219	1
Myocd	c1run4_13_X_nkx2.5.e7.5	0	0.147219	1
Smyd1	c1run4_13_X_nkx2.5.e7.5	0	0.147219	1
Tbx20	c1run4_13_X_nkx2.5.e7.5	2.46778	0.147219	1
Dnmt3b	c1run4_13_X_nkx2.5.e7.5	3.50572	0.147219	1
Gata2	c1run4_13_X_nkx2.5.e7.5	11.3456	0.147219	1
Gata3	c1run4_13_X_nkx2.5.e7.5	5.55356	0.147219	1
Hand1	c1run4_13_X_nkx2.5.e7.5	6.466	0.147219	1
Msx1	c1run4_13_X_nkx2.5.e7.5	5.19408	0.147219	1
Nkx2-5	c1run4_14_X_nkx2.5.e7.5	0	0.142722	1
Ankrd1	c1run4_14_X_nkx2.5.e7.5	0	0.142722	1
Cdkn2d	c1run4_14_X_nkx2.5.e7.5	4.83226	0.142722	1
Hopx	c1run4_14_X_nkx2.5.e7.5	0	0.142722	1
Mef2c	c1run4_14_X_nkx2.5.e7.5	0	0.142722	1
Myocd	c1run4_14_X_nkx2.5.e7.5	0	0.142722	1
Smyd1	c1run4_14_X_nkx2.5.e7.5	0	0.142722	1
Tbx20	c1run4_14_X_nkx2.5.e7.5	5.88069	0.142722	1
Dnmt3b	c1run4_14_X_nkx2.5.e7.5	8.65641	0.142722	1
Gata2	c1run4_14_X_nkx2.5.e7.5	4.14477	0.142722	1
Gata3	c1run4_14_X_nkx2.5.e7.5	6.43309	0.142722	1
Hand1	c1run4_14_X_nkx2.5.e7.5	10.7165	0.142722	1
Msx1	c1run4_14_X_nkx2.5.e7.5	5.70178	0.142722	1
Nkx2-5	c1run4_17_X_nkx2.5.e7.5	0	0.161478	NA
Ankrd1	c1run4_17_X_nkx2.5.e7.5	0	0.161478	NA
Cdkn2d	c1run4_17_X_nkx2.5.e7.5	0	0.161478	NA
Hopx	c1run4_17_X_nkx2.5.e7.5	0	0.161478	NA
Mef2c	c1run4_17_X_nkx2.5.e7.5	0	0.161478	NA
Myocd	c1run4_17_X_nkx2.5.e7.5	7.1781	0.161478	NA
Smyd1	c1run4_17_X_nkx2.5.e7.5	0	0.161478	NA
Tbx20	c1run4_17_X_nkx2.5.e7.5	4.81104	0.161478	NA
Dnmt3b	c1run4_17_X_nkx2.5.e7.5	6.02891	0.161478	NA
Gata2	c1run4_17_X_nkx2.5.e7.5	5.43628	0.161478	NA
[truncated: 172 more rows]

## Sheet: Figure_5d
	c1run1_33_X_isl1.e8.5	c1run1_46_X_isl1.e8.5	c1run1_49_X_isl1.e8.5	c1run2_69_X_isl1.e8.5	c1run2_80_X_isl1.e8.5	c1run2_87_X_isl1.e8.5	c1run3_28_X_isl1.e9.5	c1run4_25_X_isl1.e9.5	c1run5_42_X_isl1.e7.5	c1run6_15_X_isl1.e8.5	c1run6_23_X_isl1.e8.5	c1run6_46_X_isl1.e8.5	c1run1_20_X_isl1.e8.5	c1run1_45_X_isl1.e8.5	c1run1_91_X_isl1.e8.5	c1run2_06_X_isl1.e8.5	c1run2_20_X_isl1.e8.5	c1run2_27_X_isl1.e8.5	c1run3_02_X_isl1.e9.5	c1run3_05_X_isl1.e9.5	c1run3_15_X_isl1.e9.5	c1run3_50_X_isl1.e9.5	c1run3_59_X_isl1.e9.5	c1run3_64_X_isl1.e9.5	c1run3_68_X_isl1.e9.5	c1run3_73_X_isl1.e9.5	c1run3_76_X_isl1.e9.5	c1run3_83_X_isl1.e9.5	c1run3_90_X_isl1.e9.5	c1run4_15_X_isl1.e9.5	c1run4_35_X_isl1.e9.5	c1run4_43_X_isl1.e9.5	c1run4_58_X_isl1.e9.5	c1run6_01_X_isl1.e8.5	c1run6_19_X_isl1.e8.5	c1run6_27_X_isl1.e8.5	c1run6_34_X_isl1.e8.5	c1run6_53_X_isl1.e8.5	c1run6_56_X_isl1.e8.5	c1run6_57_X_isl1.e8.5	c1run6_60_X_isl1.e8.5	c1run1_05_X_isl1.e8.5	c1run1_17_X_isl1.e8.5	c1run1_19_X_isl1.e8.5	c1run1_21_X_isl1.e8.5	c1run1_28_X_isl1.e8.5	c1run1_30_X_isl1.e8.5	c1run1_35_X_isl1.e8.5	c1run1_36_X_isl1.e8.5
Ptn	-1.02972	-1.02972	-1.02972	-1.02972	-1.02972	-1.02972	1.07539	1.30372	0.707367	-1.02972	0.0297921	-1.02972	-0.216936	-1.02972	-1.02972	1.0701	-0.0901786	-0.513367	-0.448305	-0.554008	0.956801	-1.02972	1.17339	-0.821395	1.03348	-1.02972	-1.02972	-1.02972	-0.699685	0.136181	0.88106	1.03234	0.000969049	-1.02972	-1.02972	-0.715734	0.0333868	-1.02972	0.281322	-0.317014	-1.02972	-1.02972	-1.02972	-1.02972	-1.02972	0.750278	-1.02972	-1.02972	-0.636221
Nrep	-1.41219	-0.431892	-1.63046	-1.40339	0.449069	-0.691327	0.446305	0.588682	-1.63046	0.233224	-0.669787	0.30095	0.24073	-1.43258	0.180409	0.861404	0.63975	-0.456873	0.657637	-0.048787	0.958208	-1.63046	0.486156	-0.927398	0.622292	1.14971	1.0966	0.312087	0.870351	0.453875	0.528092	-0.340369	-0.945463	0.109175	0.111773	-1.29399	0.310103	0.368773	0.460565	0.25653	0.617535	-1.63046	0.0594537	-1.63046	0.228766	-0.216978	-1.63046	0.116029	-0.344802
Plagl1	0.263786	0.554311	0.82211	0.909917	0.528308	0.834042	1.20413	-0.811919	-1.43502	0.887995	-0.531595	0.37212	-0.562179	-1.07729	1.17723	0.612703	-1.26105	0.012012	0.504205	0.565663	-0.0402267	1.06069	1.47657	1.12558	0.742199	-0.146905	0.656508	0.908745	0.594307	1.52463	0.854468	0.891401	-0.135372	0.685192	-1.43502	1.17722	0.624957	0.805373	0.738343	0.607774	0.758655	-1.43502	-0.871244	-1.43502	-1.25743	0.506318	-0.890998	-1.43502	-1.43502
Nnat	-1.41694	1.30035	-0.416123	0.264216	-0.949017	-1.41694	-1.41694	-0.102812	-1.41694	0.92781	0.190349	0.121414	0.521641	-0.583866	0.370789	0.755507	0.210493	0.381923	1.10351	0.744491	0.0185211	-1.09225	1.41414	0.177295	1.05206	0.86606	0.850401	0.497195	0.574171	0.958262	0.765922	0.83974	-0.0423842	-0.96109	1.49615	0.861299	0.273751	-0.124689	-0.286115	-1.10885	-1.41694	0.365144	-1.41694	0.133948	-1.41694	0.443584	-1.41694	-1.41694	-1.17793
Spin2c	-1.13145	-1.13145	-1.13145	1.07301	-1.13145	-1.13145	-0.646708	0.781084	-1.13145	0.375649	0.218493	-1.13145	-0.146121	-1.13145	0.758522	-0.382243	-1.13145	0.839858	-1.13145	-1.13145	-1.13145	0.215559	0.745517	-1.13145	-1.13145	0.580919	-1.13145	-1.13145	1.01202	-1.13145	-0.598366	-1.13145	-0.707598	0.545641	0.76241	-0.857781	0.30409	-1.13145	-1.13145	0.108078	1.08752	1.34973	1.13802	1.40978	1.35438	0.898334	1.48972	1.22982	0.101323
Actc1	-0.549185	-0.751651	-0.671551	-1.00949	-1.00949	-1.00949	-0.755993	-1.00949	-1.00949	-1.00949	-1.00949	-1.00949	1.06131	1.38022	1.48234	1.60825	1.2321	1.4433	1.5864	1.75154	1.88661	1.59548	1.3742	2.02016	1.65211	1.48861	1.8169	1.85238	1.84806	0.812145	-0.343117	0.391036	0.321679	1.74341	-0.0446643	1.81737	1.667	1.7619	1.96577	-0.826492	1.84485	-0.695034	-1.00949	-0.691378	-0.600764	-0.574256	-0.822052	-0.69818	0.431045
Crabp2	-1.3225	-1.3225	-1.3225	0.272763	-1.3225	-1.3225	-0.776865	1.104	-1.3225	-0.656167	0.325229	-1.3225	0.849197	0.799164	-1.3225	-0.898747	-0.14747	1.01706	1.2541	-0.590925	-1.11198	-1.3225	0.314388	1.05229	0.731866	1.23876	-0.292887	0.545117	0.838994	1.07045	-0.650554	-0.182626	0.393241	-0.932508	0.225745	0.808546	1.225	-1.3225	-1.3225	1.33578	-0.85351	-1.3225	0.670266	-1.3225	-1.3225	-0.98677	-1.3225	0.202989	-1.3225
Ptprd	-1.08304	-0.889278	-1.08304	0.755048	-1.08304	-1.08304	1.02083	1.11818	-0.266319	0.220974	0.452235	1.01725	0.250849	-1.08304	-1.08304	-0.169541	-1.08304	-0.850656	0.630765	-0.550926	0.979045	-0.152948	0.0148113	0.901346	0.605375	1.96703	-0.0380267	1.01567	0.89934	-0.711161	0.860875	1.3227	1.1222	-1.08304	0.267155	0.0228117	1.54766	1.49653	-1.08304	-0.0850189	1.32813	-1.08304	-1.08304	-1.08304	-1.08304	-1.08304	-0.673653	-1.08304	-0.847436
Meis1	0.98003	-1.77555	0.535298	-0.117725	0.83551	-1.77555	0.760629	0.773452	-0.841154	0.453079	-1.77555	0.502661	1.02065	1.43058	1.07618	0.904619	0.365173	-0.536905	0.395531	-0.40581	0.583802	0.832626	1.06712	0.513914	0.284819	1.07987	0.145278	0.670521	0.749991	0.814671	0.778361	1.03102	1.15492	0.663343	0.551747	0.784917	1.00403	0.384451	0.669094	0.49524	0.441095	-1.77555	0.238398	-1.77555	0.974388	0.796608	0.485907	0.4063	-1.77555
Sall3	1.13833	0.674463	1.66784	1.64035	1.14766	1.83357	1.44314	-0.811748	0.798154	-0.124942	1.44292	-0.811748	-0.811748	-0.811748	-0.811748	-0.811748	1.61427	0.253128	-0.811748	-0.811748	-0.811748	-0.811748	-0.811748	-0.811748	-0.811748	-0.811748	-0.811748	-0.548037	-0.811748	-0.479079	-0.811748	-0.811748	-0.811748	-0.811748	-0.811748	-0.811748	0.925688	-0.811748	-0.811748	-0.811748	-0.811748	1.70579	1.7199	1.77467	1.12944	0.763503	0.850533	1.23247	1.84171
Tspan13	0.729207	-0.238609	0.592238	0.728007	-1.13968	0.595417	0.501552	1.01064	0.614232	1.0216	-1.13968	0.485825	-1.13968	-1.13968	0.517085	1.10359	-1.13968	0.763245	-1.13968	1.11391	0.958175	1.0316	1.20506	1.36822	-1.13968	-0.724826	-1.13968	1.25182	0.368394	0.690924	1.00189	-1.13968	-0.915789	-0.74106	1.19512	-1.13968	-1.13968	0.706067	1.23259	-1.13968	-0.660313	-1.13968	-1.13968	-1.13968	-1.13968	-1.13968	-1.13968	1.17953	-1.13968
Nr2f1	-0.767909	1.42023	-0.767909	-0.767909	-0.767909	-0.767909	1.09215	-0.767909	-0.767909	-0.767909	-0.767909	-0.767909	1.46039	-0.767909	-0.767909	-0.767909	0.661406	-0.767909	2.12249	-0.562227	1.36517	-0.767909	-0.767909	1.53587	1.71523	-0.767909	1.77867	1.04714	-0.509866	-0.767909	-0.466706	0.198076	-0.515451	-0.767909	0.61555	1.93738	1.87694	-0.767909	-0.767909	-0.767909	-0.767909	-0.767909	-0.767909	-0.767909	-0.767909	-0.767909	-0.767909	-0.251112	-0.767909
Zfp618	-0.993456	-0.993456	1.18198	-0.993456	-0.993456	-0.993456	0.339132	1.01442	-0.993456	-0.993456	-0.993456	-0.993456	0.578886	0.341396	-0.993456	-0.993456	-0.993456	1.2419	1.70715	-0.180685	-0.77702	-0.993456	-0.993456	1.97464	-0.245881	-0.993456	-0.643677	-0.576136	-0.993456	-0.993456	0.82296	-0.993456	1.20047	-0.274437	-0.993456	0.450491	1.22573	1.57722	-0.660436	-0.993456	-0.993456	-0.993456	-0.993456	1.73279	-0.993456	-0.993456	0.762401	0.167762	-0.993456
Dpysl3	-1.15607	0.658788	-1.15607	0.246024	0.834096	-1.15607	1.71405	1.08947	-1.15607	0.403108	-0.566583	1.2393	-0.682047	1.6303	0.291439	-0.654512	-0.959262	0.597435	1.64351	1.40966	1.02881	-0.894442	0.813394	0.0333428	1.57108	0.392285	1.54896	1.1678	0.664722	0.466795	1.11646	1.10085	-1.15607	1.37482	1.0805	1.02552	-1.15607	1.28833	0.639373	1.40161	-1.15607	-1.15607	0.73946	-0.818806	-0.955169	-0.0166207	1.07254	-0.884711	-0.676689
Kifc2	-0.787943	-0.787943	0.874632	0.737961	-0.787943	-0.787943	-0.787943	-0.787943	1.63424	0.485901	-0.787943	-0.787943	0.588205	2.0591	2.10215	1.50792	1.22239	0.876901	-0.787943	-0.787943	-0.787943	1.04391	-0.787943	-0.787943	-0.787943	-0.787943	-0.787943	0.843943	-0.535946	-0.787943	-0.787943	-0.787943	-0.787943	1.01868	0.694533	-0.787943	1.15624	1.413	-0.787943	1.82539	1.52775	0.0233437	1.03111	-0.787943	1.6721	0.27634	1.3343	1.58645	1.58379
Npnt	-0.686071	-0.686071	-0.686071	-0.686071	-0.686071	-0.686071	-0.686071	-0.330846	-0.686071	-0.686071	-0.686071	-0.686071	-0.686071	-0.686071	-0.686071	-0.686071	-0.686071	1.91522	1.25045	-0.481183	-0.686071	1.79007	1.21603	-0.686071	-0.686071	-0.326897	-0.295466	-0.686071	-0.686071	0.59946	0.208434	0.406708	-0.434588	-0.686071	0.994886	-0.686071	-0.686071	-0.686071	-0.686071	2.00677	1.84264	-0.351279	-0.686071	-0.686071	-0.686071	-0.686071	-0.686071	-0.686071	-0.686071
Msx1	-0.774153	-0.774153	0.693749	1.36324	-0.774153	0.457768	1.79975	-0.774153	-0.774153	0.188206	1.78651	-0.774153	-0.774153	-0.774153	-0.774153	-0.774153	-0.774153	-0.774153	-0.774153	-0.774153	-0.774153	-0.774153	-0.774153	-0.774153	-0.774153	-0.774153	-0.774153	-0.774153	-0.774153	-0.774153	-0.774153	1.24761	-0.774153	-0.774153	1.04972	-0.21212	-0.774153	-0.117995	-0.774153	-0.774153	-0.774153	0.0672772	1.5863	1.6123	1.68695	1.64865	1.46601	1.60572	-0.774153
Nrip1	0.710523	-1.13713	0.5577	-0.361052	-1.3214	0.716037	0.0433629	-0.286916	-1.3214	0.0772661	1.06043	1.02632	-0.958624	-1.3214	-1.3214	-1.3214	0.604494	0.831956	-1.01065	-1.3214	-1.09072	-1.01702	0.113968	-1.3214	1.03689	-1.3214	-0.233236	-0.876612	0.00172309	-1.3214	0.490266	0.833656	-0.228586	0.484763	0.350853	-0.943406	0.11755	0.292328	0.497579	-1.3214	-1.3214	-1.00187	-1.3214	-1.3214	-0.832091	0.716219	0.725236	0.820937	-0.0448379
Fzd7	-0.929225	-0.929225	-0.929225	-0.929225	-0.929225	-0.929225	0.915552	-0.929225	-0.929225	1.06189	-0.929225	-0.929225	1.31811	-0.929225	-0.568984	1.0494	1.54765	0.415307	0.958928	1.8218	-0.258709	-0.929225	-0.929225	-0.929225	0.414373	-0.929225	0.995423	-0.340426	0.544383	-0.929225	-0.628982	-0.503806	-0.929225	-0.929225	0.342899	0.812108	0.13485	-0.929225	-0.929225	-0.327152	-0.929225	-0.929225	-0.151223	-0.929225	-0.929225	-0.929225	-0.52102	0.587797	-0.929225
Adnp	-0.597229	-0.597229	-0.597229	-0.597229	-0.597229	-0.597229	-0.597229	1.29277	-0.597229	-0.597229	-0.597229	0.605924	-0.597229	1.43711	1.36924	-0.597229	-0.597229	0.559743	-0.597229	-0.597229	-0.597229	-0.597229	-0.597229	-0.597229	-0.597229	0.0687401	-0.597229	-0.597229	2.1544	-0.597229	-0.597229	-0.597229	-0.597229	-0.597229	-0.597229	-0.597229	1.73426	1.74911	-0.597229	0.671034	-0.597229	-0.597229	-0.597229	-0.597229	-0.597229	-0.597229	1.90224	0.53422	-0.597229
Syne2	-1.21295	0.622209	-1.21295	1.18718	-0.192137	-1.21295	0.748243	0.28981	0.855211	1.06742	-0.0120501	0.885089	-0.655981	0.443274	0.304553	0.34857	1.8081	-0.525367	-1.21295	0.993469	-0.260331	1.00225	-1.21295	-0.0648166	1.19579	-1.21295	-0.0735085	0.918008	0.227475	-0.104128	0.934586	-1.21295	1.47744	0.692764	0.703043	-1.21295	0.740064	0.400364	1.62425	-1.21295	1.05561	0.875208	0.582403	-1.21295	-1.21295	0.0204493	-0.573359	-0.251296	-0.649687
Lin28a	0.826315	0.818306	1.03101	0.825679	1.02829	0.625775	-1.58419	-1.12428	0.415216	0.641281	0.502915	0.28308	0.984224	0.45778	-0.85464	0.624239	0.962784	-0.241463	-0.000646649	0.876671	0.911211	-1.58419	0.722327	-1.58419	-1.58419	0.337352	-1.58419	-1.58419	-1.13634	-0.733574	0.867691	0.815369	1.21287	0.474486	0.849185	-0.266381	0.744426	0.515182	-0.290772	1.02588	0.374577	1.09693	1.10808	0.707196	0.681255	-0.107002	1.30527	0.992995	1.07782
Tnc	-0.648426	-0.648426	-0.648426	-0.648426	-0.648426	-0.648426	1.83982	-0.648426	-0.648426	-0.648426	-0.648426	-0.648426	1.75022	-0.648426	-0.648426	-0.648426	1.82611	-0.648426	-0.648426	-0.648426	1.84938	1.66557	2.14543	-0.648426	-0.100591	2.23667	-0.289128	-0.648426	2.30044	0.37131	1.67177	2.12291	2.03731	-0.648426	0.897801	1.01753	-0.648426	-0.648426	-0.648426	0.224861	2.19388	-0.648426	-0.648426	-0.27026	-0.648426	-0.648426	-0.648426	-0.648426	-0.648426
Tmem88	0.648964	0.431773	-1.16673	0.679685	1.0715	0.627414	-0.284548	0.555014	0.749514	1.17314	0.0680035	0.89077	0.255299	-0.614955	0.0380331	1.03552	0.195223	0.0169119	-0.551398	-1.39462	-1.08071	-1.09906	0.403881	-1.61055	0.848937	0.280277	0.902544	-1.31098	0.737396	0.825227	1.01128	0.825039	0.188809	0.821864	0.752374	1.21994	0.117164	1.13572	-1.61055	0.609471	-0.645868	0.559129	0.493535	1.21278	0.947829	0.77869	0.770775	0.945311	0.5676
Ankrd1	-0.761566	-0.761566	-0.761566	-0.761566	-0.235764	-0.761566	-0.761566	0.451715	-0.761566	-0.761566	-0.761566	-0.761566	-0.761566	-0.00685812	-0.761566	1.88187	-0.761566	1.74693	1.82658	2.17921	1.10851	2.54564	1.78321	2.1408	-0.761566	2.26631	2.06874	1.78275	2.06225	-0.321262	0.873137	1.14993	-0.284211	2.07797	-0.761566	1.64945	-0.761566	2.58398	2.34463	0.242914	2.49365	-0.761566	-0.761566	-0.761566	-0.761566	-0.761566	-0.761566	-0.761566	-0.761566
Rbpms2	-0.0187006	-1.21929	-0.518467	0.995458	-1.21929	0.0678083	-1.21929	-1.21929	0.874716	0.283608	-0.368242	1.21477	-0.135481	0.151202	0.826167	0.724585	1.20236	-0.886112	-0.187243	1.4854	1.02178	1.06681	0.291013	1.40162	-1.21929	0.530127	0.556706	0.858358	0.981992	0.164868	-0.436621	0.768963	-1.21929	-0.016068	1.04954	0.439294	0.353023	0.536711	0.448275	-1.21929	-0.416233	1.1842	1.03929	1.14946	1.01692	0.648714	-1.21929	-0.0643259	-0.644192
Hmcn1	1.7527	-0.580833	-0.580833	1.58211	-0.580833	-0.580833	0.581232	2.0452	-0.580833	1.76108	-0.580833	-0.580833	-0.580833	-0.580833	-0.580833	-0.580833	-0.580833	-0.580833	-0.580833	-0.580833	-0.00479516	-0.580833	-0.580833	-0.580833	-0.0446759	-0.580833	-0.580833	0.725887	-0.580833	-0.580833	-0.240305	0.659413	-0.117083	-0.580833	-0.580833	-0.580833	-0.580833	-0.580833	-0.580833	-0.580833	-0.580833	-0.580833	-0.580833	2.39844	-0.580833	-0.580833	-0.580833	-0.580833	-0.580833
Epha7	-0.696457	-0.696457	-0.696457	1.04745	-0.696457	-0.696457	2.05564	1.72484	-0.696457	-0.696457	-0.696457	-0.696457	2.11501	1.12067	-0.696457	1.78217	-0.696457	0.812363	-0.696457	1.04799	1.19571	-0.401239	1.38565	1.78094	1.70346	1.64173	1.64237	-0.15179	0.774509	-0.696457	-0.696457	-0.696457	1.37268	-0.696457	-0.696457	0.809729	1.48148	2.28751	1.10951	-0.696457	-0.696457	-0.696457	-0.696457	-0.696457	-0.696457	-0.696457	-0.696457	-0.696457	-0.696457
Amot	-0.218568	-1.68266	0.982998	1.0869	-0.319083	0.866932	-1.68266	-0.433769	0.716087	0.872369	1.18568	0.517954	-1.68266	-0.465552	1.02461	-0.132614	-1.00497	0.302324	-1.68266	-1.68266	-0.214823	0.606943	0.332387	-1.68266	-1.16782	-0.069004	0.0362178	-1.2798	0.606218	-0.919726	0.224599	0.769238	0.27241	0.76202	0.504206	0.235055	-0.763446	0.169336	-0.106231	0.405165	0.707743	0.978189	1.29595	1.12965	1.17505	1.33475	0.0742885	1.19922	0.203921
Krt8	0.632053	-1.70426	-0.414898	-0.0308959	-1.70426	0.129695	-0.084533	-1.70426	0.618981	0.0747875	-0.758149	-1.70426	0.783345	1.16551	0.698581	0.715939	0.358484	0.92244	0.124521	-1.0015	-1.2796	0.347073	1.03355	-1.27188	-1.70426	-1.52326	-1.70426	0.628279	0.890925	0.711378	0.524106	0.679004	-0.164199	1.07316	1.01275	0.605114	0.0899979	1.09276	1.25695	-0.751824	1.02181	1.11495	0.351226	0.642035	0.692547	0.495149	0.937798	0.98071	0.585735
Kdr	1.87414	1.94522	1.66026	1.01641	1.90728	1.75862	1.50011	1.40101	1.88644	1.70859	2.00739	1.76648	0.011592	-0.633791	-0.530272	-0.571672	-0.340164	-0.82352	-0.82352	-0.82352	-0.82352	-0.313828	-0.82352	-0.109317	1.47802	-0.82352	-0.342102	1.31802	-0.82352	0.758839	-0.82352	-0.82352	-0.82352	-0.284827	-0.457155	-0.82352	-0.82352	-0.82352	-0.82352	-0.82352	-0.82352	-0.82352	1.29866	1.03299	-0.272944	1.44931	0.0750729	-0.82352	1.92424
Sox18	1.77771	4.32761	4.09163	2.63957	2.58851	2.52664	2.86567	0.11834	3.16386	3.52507	2.71239	1.9712	-0.366315	-0.366315	-0.366315	-0.366315	-0.366315	-0.366315	-0.366315	-0.366315	-0.366315	-0.366315	-0.366315	-0.366315	-0.366315	-0.366315	-0.366315	-0.366315	-0.366315	-0.366315	-0.366315	-0.366315	-0.366315	-0.366315	1.24564	-0.366315	-0.366315	-0.366315	-0.366315	0.0465572	-0.366315	-0.366315	-0.366315	-0.366315	-0.366315	-0.366315	-0.366315	0.0849903	-0.366315
Hhex	1.7741	1.45219	3.62891	1.03	3.59111	3.26229	2.45502	1.50162	3.16673	1.97516	3.09346	0.91941	-0.48817	-0.48817	-0.48817	-0.48817	-0.48817	-0.48817	-0.48817	-0.48817	-0.48817	-0.48817	-0.48817	-0.48817	-0.110571	-0.48817	-0.48817	-0.116624	-0.48817	-0.48817	-0.48817	-0.48817	-0.48817	-0.48817	-0.48817	-0.48817	-0.48817	-0.48817	-0.48817	-0.48817	-0.48817	1.16098	-0.48817	-0.48817	-0.48817	1.87765	-0.48817	1.30834	-0.48817
Zc3hav1	1.98462	0.982988	1.95621	1.90877	1.5654	2.01055	1.85012	1.6789	2.16625	0.913901	-0.614828	1.72551	-0.614828	-0.614828	-0.614828	-0.614828	-0.614828	-0.614828	-0.614828	1.86653	-0.614828	-0.614828	-0.614828	-0.614828	-0.614828	-0.614828	-0.614828	0.612943	-0.614828	-0.614828	-0.614828	1.52741	-0.40346	-0.614828	-0.614828	-0.614828	-0.614828	-0.614828	-0.614828	1.2438	-0.614828	-0.614828	1.59733	-0.614828	-0.614828	-0.614828	-0.614828	1.98257	1.20649
Pdcd4	-1.19569	-1.67552	-3.16037	-0.14344	-1.79568	-0.49953	0.817355	0.549836	-0.849314	-1.07928	-2.50998	-0.911112	-0.00120913	0.727678	0.376313	1.08455	-0.100643	0.418679	0.462286	0.74915	0.967218	-0.377597	-0.119587	0.0748058	1.50721	0.748388	0.676847	0.699074	0.83792	0.442049	0.300811	-0.0903651	1.14172	-0.529403	-0.523493	-0.102777	-0.437513	-0.0978904	-0.256434	0.567392	-1.62499	-0.858089	-0.435002	-0.888928	-1.22995	-0.16717	-0.624152	0.137104	-0.862386
Sox7	2.62032	3.79594	2.85649	1.5736	3.35468	3.08173	-0.361698	2.42257	2.87446	2.24177	3.3838	1.57165	-0.361698	-0.361698	-0.361698	-0.361698	-0.361698	-0.361698	-0.361698	-0.361698	-0.361698	-0.361698	-0.361698	-0.361698	-0.361698	-0.361698	-0.361698	-0.361698	-0.361698	-0.361698	-0.361698	-0.361698	-0.361698	-0.361698	-0.361698	-0.361698	-0.361698	-0.361698	-0.361698	-0.361698	-0.361698	-0.361698	-0.361698	-0.361698	-0.361698	3.60282	-0.361698	-0.361698	-0.361698
Esam	3.01178	3.68836	2.39002	2.99381	3.5054	3.31055	-0.340759	3.63584	1.55115	3.17487	2.96075	-0.340759	-0.340759	-0.340759	-0.340759	-0.340759	-0.340759	-0.340759	-0.340759	-0.340759	-0.340759	-0.340759	-0.340759	-0.340759	-0.340759	-0.0717758	-0.340759	-0.340759	-0.340759	-0.340759	-0.340759	-0.340759	-0.340759	-0.340759	-0.340759	-0.340759	-0.340759	-0.340759	-0.340759	-0.340759	-0.340759	-0.340759	-0.340759	-0.340759	-0.340759	-0.340759	-0.340759	-0.340759	2.63838
Myzap	3.46198	3.23704	3.31071	2.23302	3.30563	2.23361	-0.436537	1.77741	0.603108	2.98317	2.36864	2.39695	-0.436537	-0.436537	-0.436537	-0.436537	-0.130055	-0.436537	1.92713	-0.436537	-0.436537	-0.436537	-0.436537	3.03879	-0.436537	-0.436537	-0.436537	1.60782	-0.436537	-0.436537	-0.436537	-0.436537	-0.436537	-0.436537	-0.436537	-0.436537	-0.436537	-0.436537	-0.436537	-0.436537	-0.436537	-0.436537	-0.436537	-0.436537	-0.436537	-0.436537	-0.436537	-0.436537	-0.436537
Myo1c	1.89002	2.27451	2.24949	0.793517	2.02278	2.1782	0.510369	0.939393	1.3726	1.9607	1.44728	1.45166	-0.732761	-0.732761	-0.732761	-0.732761	-0.489498	0.691728	-0.732761	-0.732761	-0.732761	2.17459	1.0175	0.57522	2.08558	-0.732761	-0.732761	1.62603	0.505918	-0.732761	-0.732761	-0.732761	1.25425	-0.732761	-0.732761	1.23361	1.91132	1.19237	-0.732761	0.0538062	1.19919	-0.732761	-0.732761	0.325005	-0.732761	0.100963	-0.732761	-0.732761	-0.732761
Aplnr	2.80459	2.79227	1.89017	1.25802	0.820174	2.33826	-0.265211	2.09242	1.86133	2.0765	1.23595	2.39479	-0.529304	-0.529304	-0.529304	2.09378	-0.529304	1.03195	-0.529304	-0.529304	-0.529304	-0.529304	-0.529304	-0.529304	-0.529304	-0.529304	-0.529304	-0.529304	-0.529304	-0.529304	-0.529304	0.685977	-0.529304	-0.529304	-0.529304	-0.529304	1.9814	-0.529304	-0.529304	-0.529304	-0.529304	-0.529304	-0.529304	-0.529304	-0.529304	-0.136516	2.13138	-0.529304	1.67494
[truncated: 41 more rows]
[truncated: 76 more columns]

## Sheet: Figure_8b
Cluster2
[truncated: 339 more rows]
[truncated: 291 more columns]

## Sheet: Supplementary_Figure_1a-e
Sample	platform	total_features	pct_dropout	pct_counts_feature_controls_mito	percent_genes	exprs_feature_controls_housekeeping
X93364_0_12_nkx.e8.5	WG	7.67243	99.5585	3.25987	47.0635	3.19848
X93364_0_15_nkx.e8.5	WG	7.63662	99.5689	2.58368	36.7199	3.4461
[truncated: 1,841 more rows]

## Sheet: Supplementary_Figure_5e-f
Gene	c1run1_40_X_nkx2.5.e8.5	c1run1_54_X_nkx2.5.e8.5	c1run1_55_X_nkx2.5.e8.5	c1run1_58_X_nkx2.5.e8.5	c1run1_60_X_nkx2.5.e8.5	c1run1_91_X_nkx2.5.e8.5	c1run3_02_X_nkx2.5.e9.5	c1run3_04_X_nkx2.5.e9.5	c1run3_05_X_nkx2.5.e9.5	c1run3_07_X_nkx2.5.e9.5	c1run3_08_X_nkx2.5.e9.5	c1run3_09_X_nkx2.5.e9.5	c1run3_11_X_nkx2.5.e9.5	c1run3_12_X_nkx2.5.e9.5	c1run3_13_X_nkx2.5.e9.5	c1run3_14_X_nkx2.5.e9.5	c1run3_15_X_nkx2.5.e9.5	c1run3_16_X_nkx2.5.e9.5	c1run3_17_X_nkx2.5.e9.5	c1run3_18_X_nkx2.5.e9.5	c1run3_20_X_nkx2.5.e9.5	c1run3_21_X_nkx2.5.e9.5	c1run3_22_X_nkx2.5.e9.5	c1run3_23_X_nkx2.5.e9.5	c1run3_25_X_nkx2.5.e9.5	c1run3_30_X_nkx2.5.e9.5	c1run3_32_X_nkx2.5.e9.5	c1run3_34_X_nkx2.5.e9.5	c1run3_35_X_nkx2.5.e9.5	c1run3_39_X_nkx2.5.e9.5	c1run3_42_X_nkx2.5.e9.5	c1run3_43_X_nkx2.5.e9.5	c1run3_46_X_nkx2.5.e9.5	c1run3_47_X_nkx2.5.e9.5	c1run3_51_X_nkx2.5.e9.5	c1run3_53_X_nkx2.5.e9.5	c1run3_55_X_nkx2.5.e9.5	c1run3_58_X_nkx2.5.e9.5	c1run3_60_X_nkx2.5.e9.5	c1run3_62_X_nkx2.5.e9.5	c1run3_63_X_nkx2.5.e9.5	c1run3_65_X_nkx2.5.e9.5	c1run3_73_X_nkx2.5.e9.5	c1run3_74_X_nkx2.5.e9.5	c1run3_75_X_nkx2.5.e9.5	c1run3_76_X_nkx2.5.e9.5	c1run3_81_X_nkx2.5.e9.5	c1run3_83_X_nkx2.5.e9.5	c1run3_84_X_nkx2.5.e9.5
[truncated: 85 more rows]
[truncated: 723 more columns]

[truncated: 6 more sheets: Supplementary_Figure_6, Supplementary_Figure_7a, Supplementary_Figure_7b, Supplementary_Figure_7c, Supplementary_Figure_7d, Supplementary_Figure_9c]
