# Supplementary material for: Single cell RNA-seq and ATAC-seq analysis of cardiac progenitor cell transition states and lineage settlement
Source: Nat Commun. 2018 Nov 19;9:4877. doi: 10.1038/s41467-018-07307-6 (PMC6242939; doi:10.1038/s41467-018-07307-6)
Supplement: Supplementary file 5 — Supplementary Data 1 [file 41467_2018_7307_MOESM5_ESM.xlsx]

## Sheet: Nkx2-5_cluster 1
geneID	pval	lfc	lfc.hi	lfc.lo	fdr.x	basemeanA	basemeanB	symbol	biotype	description	auroc	clusts	marker_pval	marker_fdr
Supplementary Data 1. List of genes that are differentially expressed in Nkx2-5+CPC clusters.
ENSMUSG00000000125	1.39626e-14	-3.27868	-2.29959	-4.25777	6.01041e-12	3.4985	0.162051	Wnt3	protein_coding	wingless-type MMTV integration site family, member 3 [Source:MGI Symbol;Acc:MGI:98955]	0.763333	1	6.35916e-12	7.44404e-08
ENSMUSG00000000805	2.15627e-14	-5.94226	-4.77051	-7.11402	8.96192e-12	8.85408	2.76893	Car4	protein_coding	carbonic anhydrase 4 [Source:MGI Symbol;Acc:MGI:1096574]	0.872727	1	2.32865e-14	2.75433e-10
ENSMUSG00000001349	1.32874e-07	3.52424	4.63433	2.41416	5.51851e-06	1.08684	4.64634	Cnn1	protein_coding	calponin 1 [Source:MGI Symbol;Acc:MGI:104979]	0.992905	2	6.93521e-28	8.35485e-24
ENSMUSG00000002100	1.5682e-11	4.91218	5.95553	3.86884	2.66219e-09	0.433101	5.38637	Mybpc3	protein_coding	myosin binding protein C, cardiac [Source:MGI Symbol;Acc:MGI:102844]	0.993839	2	9.06156e-26	1.09092e-21
ENSMUSG00000004187	2.11096e-07	-3.31485	-2.26012	-4.36959	7.87723e-06	6.36101	2.96687	Kifc2	protein_coding	kinesin family member C2 [Source:MGI Symbol;Acc:MGI:109187]	0.729293	1	3.09228e-06	0.0336286
ENSMUSG00000004885	1.06381e-07	3.8016	4.94338	2.65981	4.53079e-06	1.95472	5.81325	Crabp2	protein_coding	cellular retinoic acid binding protein II [Source:MGI Symbol;Acc:MGI:88491]	0.850871	3	7.11021e-14	8.39574e-10
ENSMUSG00000004951	7.31152e-09	2.92994	3.66236	2.19751	4.95088e-07	0.292097	3.25983	Hspb1	protein_coding	heat shock protein 1 [Source:MGI Symbol;Acc:MGI:96240]	0.956871	2	7.10591e-26	8.55623e-22
ENSMUSG00000006221	5.68725e-09	2.89029	3.60244	2.17814	3.96234e-07	0.0649265	2.9943	Hspb7	protein_coding	heat shock protein family, member 7 (cardiovascular) [Source:MGI Symbol;Acc:MGI:1352494]	0.952577	2	1.76046e-27	2.12065e-23
ENSMUSG00000006360	1.94983e-07	3.6168	4.71866	2.51494	7.41364e-06	1.77304	5.42981	Crip1	protein_coding	cysteine-rich protein 1 (intestinal) [Source:MGI Symbol;Acc:MGI:88501]	0.980769	2	1.21163e-23	1.45553e-19
ENSMUSG00000006567	7.5211e-08	3.22765	4.12668	2.32863	3.44684e-06	0.911413	4.17928	Atp7b	protein_coding	ATPase, Cu++ transporting, beta polypeptide [Source:MGI Symbol;Acc:MGI:103297]	0.860624	2	1.58902e-14	1.88076e-10
ENSMUSG00000007122	1.36983e-08	3.62524	4.54154	2.70894	8.46693e-07	0.24542	3.91696	Casq1	protein_coding	calsequestrin 1 [Source:MGI Symbol;Acc:MGI:1309468]	0.914768	2	2.09999e-22	2.51746e-18
ENSMUSG00000010760	5.75396e-32	-8.95664	-7.95045	-9.96284	6.93525e-28	10.1096	0.965467	Phlda2	protein_coding	pleckstrin homology like domain, family A, member 2 [Source:MGI Symbol;Acc:MGI:1202307]	0.966869	1	2.01937e-24	2.42889e-20
ENSMUSG00000014907	5.74059e-10	-3.04259	-2.1556	-3.92957	5.8176e-08	4.60053	1.51245	Naf1	protein_coding	nuclear assembly factor 1 ribonucleoprotein [Source:MGI Symbol;Acc:MGI:2682306]	0.794141	1	1.45934e-09	1.68467e-05
ENSMUSG00000015053	4.92177e-15	-4.26161	-3.09098	-5.43223	2.47175e-12	5.2247	0.863508	Gata2	protein_coding	GATA binding protein 2 [Source:MGI Symbol;Acc:MGI:95662]	0.848283	1	9.37834e-16	1.11471e-11
ENSMUSG00000015619	2.81804e-11	-3.32961	-2.44717	-4.21204	4.52878e-09	4.76354	1.36371	Gata3	protein_coding	GATA binding protein 3 [Source:MGI Symbol;Acc:MGI:95663]	0.824848	1	4.82555e-12	5.65361e-08
ENSMUSG00000016386	3.80074e-09	4.00894	5.05619	2.96168	2.84536e-07	1.48141	5.53225	Mpped2	protein_coding	metallophosphoesterase domain containing 2 [Source:MGI Symbol;Acc:MGI:1924265]	0.847647	2	4.59493e-13	5.41053e-09
ENSMUSG00000018217	5.79831e-11	-5.08689	-3.81986	-6.35393	8.31988e-09	8.65414	3.45485	Pmp22	protein_coding	peripheral myelin protein 22 [Source:MGI Symbol;Acc:MGI:97631]	0.825253	1	9.44966e-11	1.10032e-06
ENSMUSG00000018263	1.1331e-08	3.58348	4.52245	2.64451	7.30337e-07	0.896746	4.51969	Tbx5	protein_coding	T-box 5 [Source:MGI Symbol;Acc:MGI:102541]	0.76475	2	2.38241e-08	0.000271786
ENSMUSG00000018845	4.76384e-13	4.94079	5.87751	4.00407	1.24823e-10	0.171204	5.16255	Unc45b	protein_coding	unc-45 myosin chaperone B [Source:MGI Symbol;Acc:MGI:2443377]	0.995892	2	5.0549e-28	6.09015e-24
ENSMUSG00000019817	1.80513e-12	4.31036	5.41665	3.20407	3.75126e-10	2.60957	7.00141	Plagl1	protein_coding	pleiomorphic adenoma gene-like 1 [Source:MGI Symbol;Acc:MGI:1100874]	0.794996	2	2.08067e-09	2.3961e-05
ENSMUSG00000019880	2.88272e-12	-4.40268	-3.28902	-5.51634	5.60409e-10	5.80463	1.30995	Rspo3	protein_coding	R-spondin 3 [Source:MGI Symbol;Acc:MGI:1920030]	0.826465	1	5.01601e-13	5.90485e-09
ENSMUSG00000020160	3.00727e-08	3.35937	4.45838	2.26035	1.58282e-06	5.06507	8.48169	Meis1	protein_coding	Meis homeobox 1 [Source:MGI Symbol;Acc:MGI:104717]	0.74209	3	4.76499e-07	0.00530487
ENSMUSG00000020475	6.5271e-13	5.12073	6.13979	4.10167	1.60553e-10	0.202245	5.38969	Pgam2	protein_coding	phosphoglycerate mutase 2 [Source:MGI Symbol;Acc:MGI:1933118]	0.975355	2	2.05616e-27	2.47644e-23
ENSMUSG00000020542	3.64117e-07	3.92906	5.07039	2.78773	1.21024e-05	0.844982	4.84595	Myocd	protein_coding	myocardin [Source:MGI Symbol;Acc:MGI:2137495]	0.977035	2	1.4058e-26	1.693e-22
ENSMUSG00000020644	7.87268e-17	3.29828	3.98513	2.61144	7.29919e-14	7.16522	10.5369	Id2	protein_coding	inhibitor of DNA binding 2 [Source:MGI Symbol;Acc:MGI:96397]	0.709858	2	2.06486e-05	0.217719
ENSMUSG00000021200	3.40505e-10	3.66308	4.47936	2.84679	3.83562e-08	0.0471513	3.77154	Asb2	protein_coding	ankyrin repeat and SOCS box-containing 2 [Source:MGI Symbol;Acc:MGI:1929743]	0.95463	2	2.04029e-27	2.45753e-23
ENSMUSG00000021453	2.47607e-07	-3.26448	-2.16477	-4.36419	8.90868e-06	6.059	2.7229	Gadd45g	protein_coding	growth arrest and DNA-damage-inducible 45 gamma [Source:MGI Symbol;Acc:MGI:1346325]	0.761616	1	1.14389e-07	0.00129042
ENSMUSG00000021469	4.64093e-10	-3.55204	-2.57097	-4.5331	4.90676e-08	5.72931	2.09751	Msx2	protein_coding	msh homeobox 2 [Source:MGI Symbol;Acc:MGI:97169]	0.797778	1	9.98611e-10	1.15469e-05
ENSMUSG00000021702	4.18227e-09	3.1646	3.95792	2.37128	3.0185e-07	0.015503	3.22027	Thbs4	protein_coding	thrombospondin 4 [Source:MGI Symbol;Acc:MGI:1101779]	0.900112	2	1.36198e-22	1.63356e-18
ENSMUSG00000021728	4.66075e-08	-3.74767	-2.6037	-4.89163	2.32132e-06	8.30676	4.47661	Emb	protein_coding	embigin [Source:MGI Symbol;Acc:MGI:95321]	0.793737	1	8.26005e-09	9.46354e-05
ENSMUSG00000021798	1.10594e-11	4.42623	5.34182	3.51064	1.93186e-09	0.407886	4.87545	Ldb3	protein_coding	LIM domain binding 3 [Source:MGI Symbol;Acc:MGI:1344412]	0.974701	2	3.12217e-24	3.7541e-20
ENSMUSG00000021838	1.4612e-08	2.94394	3.70465	2.18323	8.8502e-07	0.372476	3.34105	Samd4	protein_coding	sterile alpha motif domain containing 4 [Source:MGI Symbol;Acc:MGI:1921730]	0.855116	2	4.78382e-15	5.67313e-11
ENSMUSG00000022272	3.15795e-07	-3.30131	-2.22214	-4.38048	1.07227e-05	7.27986	3.90979	Myo10	protein_coding	myosin X [Source:MGI Symbol;Acc:MGI:107716]	0.770101	1	1.04909e-07	0.00118401
ENSMUSG00000022346	2.06743e-09	-3.61347	-2.57949	-4.64745	1.6724e-07	6.39094	2.68647	Myc	protein_coding	myelocytomatosis oncogene [Source:MGI Symbol;Acc:MGI:97250]	0.771919	1	3.56522e-08	0.000405971
ENSMUSG00000022358	2.70456e-10	3.86072	4.80325	2.91819	3.16486e-08	0.42406	4.30477	Fbxo32	protein_coding	F-box protein 32 [Source:MGI Symbol;Acc:MGI:1914981]	0.953417	2	1.16074e-22	1.39242e-18
ENSMUSG00000022483	1.25922e-13	4.54476	5.42225	3.66727	4.10199e-11	0.495885	5.10728	Col2a1	protein_coding	collagen, type II, alpha 1 [Source:MGI Symbol;Acc:MGI:88452]	0.884989	2	4.19818e-16	4.99205e-12
ENSMUSG00000022790	1.14441e-12	-3.32329	-2.55904	-4.08755	2.60846e-10	5.11323	1.71732	Igsf11	protein_coding	immunoglobulin superfamily, member 11 [Source:MGI Symbol;Acc:MGI:2388477]	0.846465	1	3.06847e-12	3.5987e-08
ENSMUSG00000022803	7.06921e-08	4.14488	5.3656	2.92417	3.30253e-06	2.05699	6.24734	Popdc2	protein_coding	popeye domain containing 2 [Source:MGI Symbol;Acc:MGI:1930150]	0.985063	2	8.40876e-24	1.01031e-19
ENSMUSG00000023043	7.85297e-07	-3.49581	-2.33281	-4.6588	2.22444e-05	9.05061	5.46463	Krt18	protein_coding	keratin 18 [Source:MGI Symbol;Acc:MGI:96692]	0.772525	1	9.0841e-08	0.00102659
ENSMUSG00000023902	2.06963e-15	-3.02641	-2.05694	-3.99588	1.22384e-12	3.36744	0.248577	Zscan10	protein_coding	zinc finger and SCAN domain containing 10 [Source:MGI Symbol;Acc:MGI:3040700]	0.809798	1	1.52473e-16	1.81412e-12
ENSMUSG00000024049	1.84357e-09	3.89759	4.84191	2.95327	1.50139e-07	0.392028	4.3196	Myom1	protein_coding	myomesin 1 [Source:MGI Symbol;Acc:MGI:1341430]	0.964339	2	2.50624e-24	3.014e-20
ENSMUSG00000024501	4.09398e-16	4.83552	5.87729	3.79375	3.28965e-13	1.086	6.02749	Dpysl3	protein_coding	dihydropyrimidinase-like 3 [Source:MGI Symbol;Acc:MGI:1349762]	0.732263	2	1.59666e-06	0.0175329
ENSMUSG00000024565	1.27176e-12	-3.97418	-2.88721	-5.06116	2.83863e-10	5.50272	1.44131	Sall3	protein_coding	sal-like 3 (Drosophila) [Source:MGI Symbol;Acc:MGI:109295]	0.828889	1	2.20837e-12	2.59152e-08
ENSMUSG00000024803	2.71982e-13	5.20694	6.40631	4.00758	7.62371e-11	0.894359	6.15862	Ankrd1	protein_coding	ankyrin repeat domain 1 (cardiac muscle) [Source:MGI Symbol;Acc:MGI:1097717]	0.980583	2	4.52399e-23	5.42969e-19
ENSMUSG00000025491	2.11191e-22	-5.79438	-4.91805	-6.67071	6.36371e-19	7.30792	1.35541	Ifitm1	protein_coding	interferon induced transmembrane protein 1 [Source:MGI Symbol;Acc:MGI:1915963]	0.93798	1	7.38771e-20	8.83274e-16
ENSMUSG00000025529	1.96371e-10	-4.13865	-2.94628	-5.33103	2.41516e-08	6.06898	1.87389	Zfp711	protein_coding	zinc finger protein 711 [Source:MGI Symbol;Acc:MGI:3045342]	0.797172	1	1.17416e-09	1.35639e-05
ENSMUSG00000025591	3.6754e-09	-2.81084	-2.02923	-3.59245	2.76872e-07	6.74691	3.83147	Tma16	protein_coding	translation machinery associated 16 [Source:MGI Symbol;Acc:MGI:1913532]	0.807879	1	1.70663e-09	1.96842e-05
ENSMUSG00000026124	3.56994e-13	-4.15179	-3.09003	-5.21355	9.56188e-11	5.42985	1.18722	Cfc1	protein_coding	cripto, FRL-1, cryptic family 1 [Source:MGI Symbol;Acc:MGI:109448]	0.836465	1	9.60385e-14	1.13383e-09
ENSMUSG00000026163	1.147e-12	3.68771	4.40808	2.96733	2.60846e-10	0.0618772	3.79487	Sphkap	protein_coding	SPHK1 interactor, AKAP domain containing [Source:MGI Symbol;Acc:MGI:1924879]	0.919903	2	5.89371e-21	7.05419e-17
ENSMUSG00000026185	8.01525e-23	6.83129	7.76479	5.8978	3.22026e-19	1.16824	8.1079	Igfbp5	protein_coding	insulin-like growth factor binding protein 5 [Source:MGI Symbol;Acc:MGI:96440]	0.815907	2	1.0606e-10	1.23465e-06
ENSMUSG00000026414	3.64442e-09	5.14503	6.50294	3.78712	2.76872e-07	1.76422	6.94897	Tnnt2	protein_coding	troponin T2, cardiac [Source:MGI Symbol;Acc:MGI:104597]	0.99888	2	1.50959e-24	1.81619e-20
ENSMUSG00000026418	2.72223e-14	6.19549	7.58621	4.80478	1.05842e-11	2.95422	9.1981	Tnni1	protein_coding	troponin I, skeletal, slow 1 [Source:MGI Symbol;Acc:MGI:105073]	0.998133	2	2.3288e-24	2.80085e-20
ENSMUSG00000026430	5.44296e-09	3.39803	4.22647	2.56958	3.83649e-07	0.150945	3.59447	Rassf5	protein_coding	Ras association (RalGDS/AF-6) domain family member 5 [Source:MGI Symbol;Acc:MGI:1926375]	0.915235	2	1.13508e-22	1.36175e-18
ENSMUSG00000026455	4.10805e-08	-3.16266	-2.12272	-4.20259	2.09807e-06	4.94376	1.72228	Klhl12	protein_coding	kelch-like 12 [Source:MGI Symbol;Acc:MGI:2385619]	0.770909	1	1.40148e-08	0.000160301
ENSMUSG00000026509	8.95104e-10	-3.18818	-2.24303	-4.13333	8.49503e-08	5.26735	2.00732	Capn2	protein_coding	calpain 2 [Source:MGI Symbol;Acc:MGI:88264]	0.797071	1	1.85268e-09	2.13595e-05
ENSMUSG00000026576	1.44585e-08	3.72982	4.69695	2.76269	8.80141e-07	0.863546	4.63852	Atp1b1	protein_coding	ATPase, Na+/K+ transporting, beta 1 polypeptide [Source:MGI Symbol;Acc:MGI:88108]	0.977315	2	1.75686e-24	2.11333e-20
ENSMUSG00000026817	9.75327e-08	3.30097	4.5397	2.06224	4.21348e-06	2.84621	6.16041	Ak1	protein_coding	adenylate kinase 1 [Source:MGI Symbol;Acc:MGI:87977]	0.95435	2	1.08234e-20	1.29513e-16
ENSMUSG00000026921	2.04406e-08	-3.10964	-2.07397	-4.1453	1.17319e-06	5.0987	1.9276	Egfl7	protein_coding	EGF-like domain 7 [Source:MGI Symbol;Acc:MGI:2449923]	0.783535	1	7.4654e-09	8.55759e-05
ENSMUSG00000027111	2.31154e-08	3.13808	3.95508	2.32108	1.27219e-06	0.34547	3.52141	Itga6	protein_coding	integrin alpha 6 [Source:MGI Symbol;Acc:MGI:96605]	0.793409	2	6.23046e-11	7.26222e-07
ENSMUSG00000027276	2.83853e-10	4.32748	5.49535	3.1596	3.28969e-08	3.40607	7.80042	Jag1	protein_coding	jagged 1 [Source:MGI Symbol;Acc:MGI:1095416]	0.879201	2	1.26469e-14	1.49764e-10
ENSMUSG00000027358	2.44027e-09	-3.43371	-2.35874	-4.50867	1.94785e-07	5.20826	1.70397	Bmp2	protein_coding	bone morphogenetic protein 2 [Source:MGI Symbol;Acc:MGI:88177]	0.78798	1	1.15758e-09	1.33735e-05
ENSMUSG00000027478	5.09258e-12	-4.01862	-3.09113	-4.94612	9.16132e-10	7.78806	3.63678	Dnmt3b	protein_coding	DNA methyltransferase 3B [Source:MGI Symbol;Acc:MGI:1261819]	0.832929	1	5.87428e-11	6.84824e-07
ENSMUSG00000027562	2.13229e-15	-5.58782	-4.29601	-6.87962	1.22384e-12	6.60095	0.909758	Car2	protein_coding	carbonic anhydrase 2 [Source:MGI Symbol;Acc:MGI:88269]	0.848485	1	1.31546e-15	1.5629e-11
ENSMUSG00000027684	1.24733e-08	3.23519	4.08669	2.38369	7.87122e-07	0.443661	3.72513	Mecom	protein_coding	MDS1 and EVI1 complex locus [Source:MGI Symbol;Acc:MGI:95457]	0.774262	3	6.43484e-10	7.4509e-06
ENSMUSG00000027955	7.17245e-08	2.80999	3.55449	2.06548	3.33782e-06	0.259559	3.11256	Fam198b	protein_coding	family with sequence similarity 198, member B [Source:MGI Symbol;Acc:MGI:1915909]	0.769417	2	3.8323e-10	4.44508e-06
ENSMUSG00000028011	2.77078e-12	-3.63416	-2.42226	-4.84606	5.47479e-10	4.03628	0.29252	Tdo2	protein_coding	tryptophan 2,3-dioxygenase [Source:MGI Symbol;Acc:MGI:1928486]	0.770808	1	3.98057e-14	4.70543e-10
ENSMUSG00000028289	1.36557e-07	2.98628	3.88008	2.09248	5.59836e-06	0.692901	3.7397	Epha7	protein_coding	Eph receptor A7 [Source:MGI Symbol;Acc:MGI:95276]	0.836445	2	1.16627e-13	1.37632e-09
ENSMUSG00000028717	8.95129e-11	-3.07808	-2.06301	-4.09315	1.1856e-08	3.51067	0.377823	Tal1	protein_coding	T cell acute lymphocytic leukemia 1 [Source:MGI Symbol;Acc:MGI:98480]	0.765556	1	5.23851e-11	6.1081e-07
ENSMUSG00000028773	3.39555e-09	3.31789	4.13817	2.49761	2.67494e-07	0.531672	3.89186	Fabp3	protein_coding	fatty acid binding protein 3, muscle and heart [Source:MGI Symbol;Acc:MGI:95476]	0.934653	2	4.80906e-22	5.76222e-18
ENSMUSG00000028883	2.39357e-18	5.56189	6.53782	4.58595	2.88497e-15	0.745784	6.4061	Sema3a	protein_coding	sema domain, immunoglobulin domain (Ig), short basic domain, secreted, (semaphorin) 3A [Source:MGI Symbol;Acc:MGI:107558]	0.808034	3	6.87227e-11	8.00757e-07
ENSMUSG00000029651	1.39468e-08	2.79626	3.51152	2.081	8.57656e-07	0.0598401	2.89323	Mtus2	protein_coding	microtubule associated tumor suppressor candidate 2 [Source:MGI Symbol;Acc:MGI:1915388]	0.744586	2	3.55162e-09	4.08046e-05
ENSMUSG00000029826	2.86106e-17	-6.07004	-4.78075	-7.35933	2.87369e-14	6.99936	0.811142	Zc3hav1	protein_coding	zinc finger CCCH type, antiviral 1 [Source:MGI Symbol;Acc:MGI:1926031]	0.872525	1	1.28861e-17	1.53641e-13
ENSMUSG00000029838	9.36752e-09	4.28896	5.42795	3.14996	6.16977e-07	1.53603	5.87426	Ptn	protein_coding	pleiotrophin [Source:MGI Symbol;Acc:MGI:97804]	0.968361	3	1.63383e-23	1.9624e-19
ENSMUSG00000030470	1.54043e-13	4.88216	5.81454	3.94977	4.5285e-11	0.115411	5.04103	Csrp3	protein_coding	cysteine and glycine-rich protein 3 [Source:MGI Symbol;Acc:MGI:1330824]	0.993465	2	2.51657e-28	3.03247e-24
ENSMUSG00000030551	6.70559e-07	3.37566	4.55225	2.19907	1.96171e-05	2.6659	6.0963	Nr2f2	protein_coding	nuclear receptor subfamily 2, group F, member 2 [Source:MGI Symbol;Acc:MGI:1352452]	0.827231	3	7.06991e-12	8.27321e-08
ENSMUSG00000030785	1.79864e-09	2.88494	3.59969	2.1702	1.47476e-07	0.0284734	2.95824	Cox6a2	protein_coding	cytochrome c oxidase subunit VIa polypeptide 2 [Source:MGI Symbol;Acc:MGI:104649]	0.885456	2	1.70881e-22	2.04886e-18
ENSMUSG00000031073	7.58441e-15	-3.66627	-2.52203	-4.81052	3.51596e-12	4.19231	0.412525	Fgf15	protein_coding	fibroblast growth factor 15 [Source:MGI Symbol;Acc:MGI:1096383]	0.80202	1	1.68943e-15	2.00637e-11
ENSMUSG00000031216	1.02293e-13	-5.0137	-3.8716	-6.1558	3.47334e-11	6.84295	1.73652	Stard8	protein_coding	START domain containing 8 [Source:MGI Symbol;Acc:MGI:2448556]	0.857778	1	1.43296e-13	1.69032e-09
ENSMUSG00000031434	1.15246e-18	-5.43133	-4.43286	-6.42981	1.73632e-15	6.67119	1.12369	Morc4	protein_coding	microrchidia 4 [Source:MGI Symbol;Acc:MGI:1922996]	0.902424	1	5.02414e-18	5.9938e-14
ENSMUSG00000031488	1.71766e-08	-3.16889	-2.16119	-4.1766	1.0099e-06	5.91649	2.66985	Rab11fip1	protein_coding	RAB11 family interacting protein 1 (class I) [Source:MGI Symbol;Acc:MGI:1923017]	0.776364	1	3.89577e-08	0.000443338
ENSMUSG00000031626	5.38444e-13	4.49901	5.40631	3.5917	1.38082e-10	0.414439	4.94323	Sorbs2	protein_coding	sorbin and SH3 domain containing 2 [Source:MGI Symbol;Acc:MGI:1924574]	0.976288	2	2.79708e-24	3.36349e-20
ENSMUSG00000031657	1.27567e-09	-3.41576	-2.47266	-4.35886	1.14744e-07	6.51908	3.00586	Heatr3	protein_coding	HEAT repeat containing 3 [Source:MGI Symbol;Acc:MGI:2444491]	0.791919	1	7.18924e-09	8.24174e-05
ENSMUSG00000031698	1.70647e-08	3.52808	4.54202	2.51414	1.00824e-06	0.975125	4.52475	Mylk3	protein_coding	myosin light chain kinase 3 [Source:MGI Symbol;Acc:MGI:2443063]	0.920836	2	2.64306e-19	3.15899e-15
ENSMUSG00000032035	3.66863e-08	-3.9756	-2.539	-5.4122	1.89777e-06	6.69828	2.63401	Ets1	protein_coding	E26 avian leukemia oncogene 1, 5' domain [Source:MGI Symbol;Acc:MGI:95455]	0.754141	1	1.02667e-07	0.00115891
ENSMUSG00000033149	2.4363e-08	-3.08864	-2.06057	-4.11671	1.31681e-06	6.7634	3.56188	Phldb2	protein_coding	pleckstrin homology like domain, family B, member 2 [Source:MGI Symbol;Acc:MGI:2444981]	0.758788	1	3.83186e-07	0.0042775
ENSMUSG00000033837	1.40169e-09	-4.42379	-3.23531	-5.61228	1.21543e-07	7.77753	3.23932	Foxh1	protein_coding	forkhead box H1 [Source:MGI Symbol;Acc:MGI:1347465]	0.761212	1	7.81297e-08	0.000884662
ENSMUSG00000034485	8.87432e-07	-3.1182	-2.02562	-4.21078	2.46447e-05	5.91546	2.73812	Uaca	protein_coding	uveal autoantigen with coiled-coil domains and ankyrin repeats [Source:MGI Symbol;Acc:MGI:1919815]	0.75899	1	2.19229e-07	0.00245843
ENSMUSG00000035458	4.38861e-07	3.54775	4.57036	2.52514	1.40681e-05	0.630644	4.22492	Tnni3	protein_coding	troponin I, cardiac 3 [Source:MGI Symbol;Acc:MGI:98783]	0.893017	2	1.10917e-18	1.32434e-14
ENSMUSG00000035783	7.51191e-05	4.10651	5.86681	2.34621	0.000823843	3.76219	7.89472	Acta2	protein_coding	actin, alpha 2, smooth muscle, aorta [Source:MGI Symbol;Acc:MGI:87909]	0.993839	2	4.36417e-24	5.24486e-20
ENSMUSG00000037335	7.30985e-16	-5.98296	-4.79096	-7.17496	5.18268e-13	8.13494	2.03775	Hand1	protein_coding	heart and neural crest derivatives expressed transcript 1 [Source:MGI Symbol;Acc:MGI:103577]	0.886465	1	2.19366e-15	2.60409e-11
ENSMUSG00000038086	1.52853e-06	3.2464	4.33514	2.15766	3.81437e-05	0.949231	4.23416	Hspb2	protein_coding	heat shock protein 2 [Source:MGI Symbol;Acc:MGI:1916503]	0.951456	2	6.9187e-25	8.32527e-21
ENSMUSG00000038239	9.67257e-08	2.87041	3.66034	2.08048	4.19365e-06	0.288313	3.22023	Hrc	protein_coding	histidine rich calcium binding protein [Source:MGI Symbol;Acc:MGI:96226]	0.930732	2	8.27939e-24	9.94852e-20
ENSMUSG00000038279	7.63109e-08	-3.08074	-2.12536	-4.03611	3.484e-06	7.90727	4.69917	Nop2	protein_coding	NOP2 nucleolar protein [Source:MGI Symbol;Acc:MGI:107891]	0.745859	1	1.48678e-06	0.0163486
ENSMUSG00000039176	2.33011e-14	-4.80603	-3.79618	-5.81589	9.36161e-12	8.09565	3.15386	Polg	protein_coding	polymerase (DNA directed), gamma [Source:MGI Symbol;Acc:MGI:1196389]	0.873131	1	2.0221e-13	2.38385e-09
ENSMUSG00000039239	5.14468e-07	3.15345	4.30158	2.00531	1.58997e-05	2.34791	5.55632	Tgfb2	protein_coding	transforming growth factor, beta 2 [Source:MGI Symbol;Acc:MGI:98726]	0.64984	3	0.00166366	1
ENSMUSG00000039376	1.34222e-14	4.1654	4.94869	3.3821	5.99178e-12	0.0739617	4.28141	Synpo2l	protein_coding	synaptopodin 2-like [Source:MGI Symbol;Acc:MGI:1916010]	0.960045	2	2.78383e-23	3.34226e-19
ENSMUSG00000039405	1.33286e-09	3.30758	4.08914	2.52602	1.18125e-07	0.0857679	3.42931	Prss23	protein_coding	protease, serine 23 [Source:MGI Symbol;Acc:MGI:1923703]	0.818708	2	9.82546e-14	1.1599e-09
ENSMUSG00000039607	7.84483e-07	3.03352	4.03145	2.0356	2.22444e-05	1.56438	4.64025	Rbms3	protein_coding	RNA binding motif, single stranded interacting protein [Source:MGI Symbol;Acc:MGI:2444477]	0.67348	3	0.000223868	1
ENSMUSG00000040483	4.2857e-12	-3.46328	-2.59691	-4.32966	7.82659e-10	5.21051	1.67723	Xaf1	protein_coding	XIAP associated factor 1 [Source:MGI Symbol;Acc:MGI:3772572]	0.849495	1	2.49233e-12	2.92375e-08
ENSMUSG00000040666	1.45342e-13	3.98062	5.10422	2.85702	4.48805e-11	1.42551	5.41969	Sh3bgr	protein_coding	SH3-binding domain glutamic acid-rich protein [Source:MGI Symbol;Acc:MGI:1354740]	0.996639	2	7.59418e-26	9.14339e-22
ENSMUSG00000040694	3.08281e-07	2.94955	3.81668	2.08242	1.05669e-05	0.286463	3.32542	Apobec2	protein_coding	apolipoprotein B mRNA editing enzyme, catalytic polypeptide 2 [Source:MGI Symbol;Acc:MGI:1343178]	0.927745	2	5.34055e-25	6.42682e-21
ENSMUSG00000040723	1.25772e-09	3.53511	4.41854	2.65167	1.1398e-07	0.530107	4.08565	Rcsd1	protein_coding	RCSD domain containing 1 [Source:MGI Symbol;Acc:MGI:2676394]	0.96714	2	2.03737e-23	2.44668e-19
ENSMUSG00000040752	3.08771e-13	6.02441	7.29793	4.7509	8.45822e-11	1.06778	7.15335	Myh6	protein_coding	myosin, heavy polypeptide 6, cardiac muscle, alpha [Source:MGI Symbol;Acc:MGI:97255]	0.973301	2	2.00037e-22	2.39825e-18
ENSMUSG00000041476	7.89549e-11	3.77946	4.62059	2.93833	1.06926e-08	0.0306306	3.84861	Smpx	protein_coding	small muscle protein, X-linked [Source:MGI Symbol;Acc:MGI:1913356]	0.919436	2	2.46782e-23	2.96336e-19
ENSMUSG00000041959	3.64886e-11	-3.55783	-2.70481	-4.41086	5.63842e-09	7.48014	3.79699	S100a10	protein_coding	S100 calcium binding protein A10 (calpactin) [Source:MGI Symbol;Acc:MGI:1339468]	0.847879	1	8.54016e-12	9.99027e-08
ENSMUSG00000042155	4.60017e-11	4.00151	5.06192	2.9411	6.8618e-09	2.29062	6.32343	Klhl23	protein_coding	kelch-like 23 [Source:MGI Symbol;Acc:MGI:2683536]	0.874533	2	1.69886e-14	2.01026e-10
ENSMUSG00000042812	9.20101e-17	-5.2847	-4.2783	-6.29109	7.92141e-14	6.91635	1.52274	Foxf1	protein_coding	forkhead box F1 [Source:MGI Symbol;Acc:MGI:1347470]	0.889495	1	3.42073e-16	4.06793e-12
ENSMUSG00000042942	1.76497e-13	-4.08407	-3.08464	-5.0835	5.06504e-11	6.1763	1.98282	Greb1l	protein_coding	growth regulation by estrogen in breast cancer-like [Source:MGI Symbol;Acc:MGI:3576497]	0.833131	1	5.15922e-12	6.04403e-08
ENSMUSG00000043154	5.16404e-07	3.10303	4.11852	2.08754	1.59187e-05	1.64238	4.76379	Ppp2r3a	protein_coding	protein phosphatase 2, regulatory subunit B'', alpha [Source:MGI Symbol;Acc:MGI:2442104]	0.798264	2	8.63226e-10	9.98666e-06
ENSMUSG00000044033	7.21736e-14	5.58121	6.70881	4.45362	2.71846e-11	1.59401	7.22001	Ccdc141	protein_coding	coiled-coil domain containing 141 [Source:MGI Symbol;Acc:MGI:1919735]	0.98301	2	3.54156e-23	4.25129e-19
ENSMUSG00000044338	3.08465e-12	-3.65946	-2.61484	-4.70409	5.90148e-10	4.38663	0.654999	Aplnr	protein_coding	apelin receptor [Source:MGI Symbol;Acc:MGI:1346086]	0.807071	1	5.37148e-13	6.32169e-09
ENSMUSG00000044938	1.54543e-07	3.44586	4.46022	2.43151	6.08727e-06	0.603465	4.07967	Klhl31	protein_coding	kelch-like 31 [Source:MGI Symbol;Acc:MGI:3045305]	0.918036	2	2.12808e-21	2.54838e-17
ENSMUSG00000045377	9.75995e-10	-3.3945	-2.48644	-4.30256	9.04897e-08	7.53614	4.0186	Tmem88	protein_coding	transmembrane protein 88 [Source:MGI Symbol;Acc:MGI:1914270]	0.802828	1	2.92243e-09	3.35963e-05
ENSMUSG00000046550	1.6268e-15	-5.58146	-4.49679	-6.66612	1.03199e-12	8.94717	3.23716	Spin2c	protein_coding	spindlin family, member 2C [Source:MGI Symbol;Acc:MGI:3605548]	0.89	1	1.00066e-14	1.18539e-10
ENSMUSG00000048285	1.9941e-10	-3.74612	-2.75758	-4.73465	2.42777e-08	6.14491	2.32621	Frmd6	protein_coding	FERM domain containing 6 [Source:MGI Symbol;Acc:MGI:2442579]	0.822323	1	1.18457e-10	1.3786e-06
ENSMUSG00000048450	6.01377e-12	-4.25387	-3.18152	-5.32622	1.06594e-09	7.09518	2.71913	Msx1	protein_coding	msh homeobox 1 [Source:MGI Symbol;Acc:MGI:97168]	0.803535	1	9.355e-10	1.082e-05
ENSMUSG00000049382	2.64255e-10	-4.37926	-3.25817	-5.50035	3.12262e-08	9.30828	4.81433	Krt8	protein_coding	keratin 8 [Source:MGI Symbol;Acc:MGI:96705]	0.826061	1	1.57986e-10	1.83754e-06
ENSMUSG00000050315	9.34899e-14	3.74003	4.56122	2.91885	3.31422e-11	0.335054	4.16303	Synpo2	protein_coding	synaptopodin 2 [Source:MGI Symbol;Acc:MGI:2153070]	0.8736	2	9.68274e-16	1.1507e-11
ENSMUSG00000050966	4.01438e-09	-3.20572	-2.29081	-4.12064	2.96843e-07	9.04139	5.71861	Lin28a	protein_coding	lin-28 homolog A (C. elegans) [Source:MGI Symbol;Acc:MGI:1890546]	0.813131	1	9.86334e-10	1.1406e-05
ENSMUSG00000051747	1.30844e-13	6.59472	8.14596	5.04348	4.15017e-11	2.11981	8.79176	Ttn	protein_coding	titin [Source:MGI Symbol;Acc:MGI:98864]	0.998693	2	3.94166e-24	4.73826e-20
ENSMUSG00000052374	6.61011e-11	4.05715	5.03851	3.07578	9.13203e-09	0.285853	4.38556	Actn2	protein_coding	actinin alpha 2 [Source:MGI Symbol;Acc:MGI:109192]	0.944268	2	1.81839e-25	2.18861e-21
ENSMUSG00000052920	2.81564e-08	2.91667	3.66708	2.16626	1.49502e-06	0.247695	3.20754	Prkg1	protein_coding	protein kinase, cGMP-dependent, type I [Source:MGI Symbol;Acc:MGI:108174]	0.82655	2	5.58537e-14	6.59968e-10
ENSMUSG00000053093	9.47132e-09	4.85066	6.13129	3.57003	6.20423e-07	0.82945	5.71861	Myh7	protein_coding	myosin, heavy polypeptide 7, cardiac muscle, beta [Source:MGI Symbol;Acc:MGI:2155600]	0.961445	2	2.66871e-22	3.19845e-18
ENSMUSG00000053702	2.41559e-12	5.69029	6.96909	4.4115	4.85252e-10	1.8029	7.55616	Nebl	protein_coding	nebulette [Source:MGI Symbol;Acc:MGI:1921353]	0.991225	2	1.10399e-23	1.32634e-19
ENSMUSG00000054263	2.11351e-06	-3.55671	-2.29132	-4.82209	4.88011e-05	7.73971	4.11443	Lifr	protein_coding	leukemia inhibitory factor receptor [Source:MGI Symbol;Acc:MGI:96788]	0.757576	1	3.64195e-07	0.00406697
ENSMUSG00000054640	3.51199e-12	3.99988	4.89048	3.10927	6.61406e-10	0.136088	4.16433	Slc8a1	protein_coding	solute carrier family 8 (sodium/calcium exchanger), member 1 [Source:MGI Symbol;Acc:MGI:107956]	0.987864	2	5.02073e-29	6.05048e-25
ENSMUSG00000055027	6.41748e-10	3.91752	4.82617	3.00886	6.34016e-08	0.677489	4.65396	Smyd1	protein_coding	SET and MYND domain containing 1 [Source:MGI Symbol;Acc:MGI:104790]	0.936333	2	5.28915e-21	6.33111e-17
ENSMUSG00000055723	1.63664e-09	-3.09072	-2.21182	-3.96963	1.38918e-07	5.49273	2.32728	Rras2	protein_coding	related RAS viral (r-ras) oncogene 2 [Source:MGI Symbol;Acc:MGI:1914172]	0.80101	1	1.88492e-09	2.17275e-05
ENSMUSG00000059741	7.09237e-10	4.6834	5.81791	3.54889	6.89389e-08	0.279392	4.99746	Myl3	protein_coding	myosin, light polypeptide 3 [Source:MGI Symbol;Acc:MGI:97268]	0.946229	2	3.69754e-24	4.44518e-20
ENSMUSG00000060260	1.03742e-13	-3.48129	-2.42292	-4.53966	3.47334e-11	4.04771	0.487775	Pwwp2b	protein_coding	PWWP domain containing 2B [Source:MGI Symbol;Acc:MGI:2142008]	0.819394	1	7.70382e-15	9.12903e-11
ENSMUSG00000060600	5.95528e-15	4.11017	5.15043	3.06991	2.87116e-12	4.67505	8.82863	Eno3	protein_coding	enolase 3, beta muscle [Source:MGI Symbol;Acc:MGI:95395]	0.90842	2	1.10725e-16	1.3183e-12
ENSMUSG00000060913	3.60004e-12	3.54254	4.29785	2.78723	6.67558e-10	0.077893	3.65697	Trim55	protein_coding	tripartite motif-containing 55 [Source:MGI Symbol;Acc:MGI:3036269]	0.971621	2	3.21912e-28	3.87872e-24
ENSMUSG00000061082	3.32188e-11	-3.69579	-2.58378	-4.80779	5.19981e-09	4.39836	0.628239	Plac1	protein_coding	placental specific protein 1 [Source:MGI Symbol;Acc:MGI:1926287]	0.787374	1	2.69243e-12	3.15822e-08
ENSMUSG00000061086	1.73579e-12	5.47859	6.78476	4.17242	3.67043e-10	1.53514	7.03468	Myl4	protein_coding	myosin, light polypeptide 4 [Source:MGI Symbol;Acc:MGI:97267]	0.999627	2	8.34365e-25	1.00391e-20
ENSMUSG00000061816	2.22073e-10	4.33098	5.40944	3.25251	2.65014e-08	0.522659	4.89686	Myl1	protein_coding	myosin, light polypeptide 1 [Source:MGI Symbol;Acc:MGI:97269]	0.961445	2	6.30106e-26	7.58774e-22
ENSMUSG00000063317	2.2688e-08	-2.93616	-2.016	-3.85632	1.2565e-06	5.11378	2.11605	Usp31	protein_coding	ubiquitin specific peptidase 31 [Source:MGI Symbol;Acc:MGI:1923429]	0.790101	1	4.94292e-09	5.67496e-05
ENSMUSG00000067818	6.12414e-08	3.96821	5.2938	2.64263	2.92914e-06	2.86003	6.85423	Myl9	protein_coding	myosin, light polypeptide 9, regulatory [Source:MGI Symbol;Acc:MGI:2138915]	0.98413	2	2.59183e-23	3.112e-19
ENSMUSG00000068329	3.49831e-09	-2.96412	-2.00643	-3.9218	2.72033e-07	5.36403	2.32284	Htra2	protein_coding	HtrA serine peptidase 2 [Source:MGI Symbol;Acc:MGI:1928676]	0.771515	1	5.31021e-08	0.000602815
ENSMUSG00000068614	3.63938e-09	6.32332	8.04533	4.60132	2.76872e-07	2.77952	9.16051	Actc1	protein_coding	actin, alpha, cardiac muscle 1 [Source:MGI Symbol;Acc:MGI:87905]	0.997946	2	3.1681e-24	3.809e-20
ENSMUSG00000069378	1.91592e-11	-3.30647	-2.39529	-4.21766	3.20731e-09	4.89381	1.51173	Prdm6	protein_coding	PR domain containing 6 [Source:MGI Symbol;Acc:MGI:2684938]	0.811212	1	4.79507e-11	5.59248e-07
ENSMUSG00000069601	1.35896e-12	4.7048	5.74982	3.65978	2.92493e-10	2.05972	6.81585	Ank3	protein_coding	ankyrin 3, epithelial [Source:MGI Symbol;Acc:MGI:88026]	0.943615	2	1.68423e-19	2.0135e-15
ENSMUSG00000071042	3.66936e-09	-3.4618	-2.32658	-4.59703	2.76872e-07	4.77345	1.24977	Rasgrp3	protein_coding	RAS, guanyl releasing protein 3 [Source:MGI Symbol;Acc:MGI:3028579]	0.788081	1	3.7022e-10	4.29492e-06
ENSMUSG00000071235	1.12948e-17	-3.27665	-2.35832	-4.19498	1.2376e-14	3.38823	0.0242846	Vrtn	protein_coding	vertebrae development associated [Source:MGI Symbol;Acc:MGI:3588197]	0.807475	1	3.38271e-18	4.03625e-14
ENSMUSG00000072244	8.87193e-14	-3.77245	-2.66998	-4.87491	3.2404e-11	4.56737	0.709586	Trim6	protein_coding	tripartite motif-containing 6 [Source:MGI Symbol;Acc:MGI:2137352]	0.826869	1	1.57949e-14	1.86981e-10
ENSMUSG00000073775	5.74376e-10	-3.20513	-2.31874	-4.09152	5.8176e-08	6.07231	2.76841	Kti12	protein_coding	KTI12 homolog, chromatin associated [Source:MGI Symbol;Acc:MGI:1923547]	0.778182	1	2.82944e-08	0.000322584
ENSMUSG00000074218	5.59941e-08	2.75082	3.47421	2.02743	2.69959e-06	0.257336	3.04993	Cox7a1	protein_coding	cytochrome c oxidase subunit VIIa 1 [Source:MGI Symbol;Acc:MGI:1316714]	0.944735	2	1.6202e-25	1.95024e-21
ENSMUSG00000078937	1.25366e-07	2.78386	3.54144	2.02627	5.24664e-06	0.196914	3.01665	Cpt1b	protein_coding	carnitine palmitoyltransferase 1b, muscle [Source:MGI Symbol;Acc:MGI:1098297]	0.868559	2	2.23626e-18	2.66853e-14
ENSMUSG00000079243	4.81242e-08	2.98939	3.79683	2.18194	2.387e-06	0.289012	3.30895	Xirp1	protein_coding	xin actin-binding repeat containing 1 [Source:MGI Symbol;Acc:MGI:1333878]	0.939974	2	1.52496e-24	1.83453e-20
ENSMUSG00000091898	6.34672e-09	4.78851	6.06816	3.50886	4.34642e-07	1.35004	6.17615	Tnnc1	protein_coding	troponin C, cardiac/slow skeletal [Source:MGI Symbol;Acc:MGI:98779]	0.975915	2	7.24277e-24	8.70364e-20
ENSMUSG00000097487	6.62841e-16	3.75715	4.49949	3.01482	4.99327e-13	0.251874	4.03972	Ptges3l	protein_coding	prostaglandin E synthase 3 (cytosolic)-like [Source:MGI Symbol;Acc:MGI:1916146]	0.956124	2	4.10173e-24	4.92987e-20

## Sheet: Nkx2-5_cluster 2
geneID	pval	lfc	lfc.hi	lfc.lo	fdr.x	basemeanA	basemeanB	symbol	biotype	description	auroc	clusts	marker_pval	marker_fdr
ENSMUSG00000000253	5.24927e-16	-4.86455	-3.82811	-5.901	3.63617e-14	5.79919	0.84395	Gmpr	protein_coding	guanosine monophosphate reductase [Source:MGI Symbol;Acc:MGI:1913605]	0.854462	2	8.7368e-17	1.04047e-12
ENSMUSG00000000266	2.67531e-13	-3.19098	-2.15467	-4.22728	1.30549e-11	3.54083	0.263901	Mid2	protein_coding	midline 2 [Source:MGI Symbol;Acc:MGI:1344333]	0.775205	2	4.45529e-14	5.26571e-10
ENSMUSG00000000567	8.54283e-09	3.17424	4.06976	2.27873	2.09282e-07	1.00954	4.2345	Sox9	protein_coding	SRY (sex determining region Y)-box 9 [Source:MGI Symbol;Acc:MGI:98371]	0.66957	3	0.000201688	1
ENSMUSG00000000594	2.91068e-23	-5.63028	-4.66967	-6.59088	3.98663e-21	9.40544	3.65888	Gm2a	protein_coding	GM2 ganglioside activator protein [Source:MGI Symbol;Acc:MGI:95762]	0.936706	2	1.97201e-19	2.35714e-15
ENSMUSG00000000631	9.05852e-14	-4.12701	-3.22357	-5.03045	4.7887e-12	6.3988	2.18553	Myo18a	protein_coding	myosin XVIIIA [Source:MGI Symbol;Acc:MGI:2667185]	0.848954	2	3.75852e-13	4.42678e-09
ENSMUSG00000000753	1.65881e-08	3.22879	4.09758	2.36001	3.80211e-07	0.384437	3.67738	Serpinf1	protein_coding	serine (or cysteine) peptidase inhibitor, clade F, member 1 [Source:MGI Symbol;Acc:MGI:108080]	0.88011	3	5.94728e-20	7.11116e-16
ENSMUSG00000001270	1.87284e-23	-6.60845	-5.57597	-7.64093	2.62481e-21	9.52474	2.80765	Ckb	protein_coding	creatine kinase, brain [Source:MGI Symbol;Acc:MGI:88407]	0.927931	2	1.09826e-18	1.31143e-14
ENSMUSG00000001300	2.00735e-08	3.47516	4.59723	2.35309	4.53933e-07	2.55452	6.08865	Efnb2	protein_coding	ephrin B2 [Source:MGI Symbol;Acc:MGI:105097]	0.666566	1	0.00105088	1
ENSMUSG00000001349	1.18724e-38	-8.44849	-7.75096	-9.14603	9.53986e-36	9.35665	0.713205	Cnn1	protein_coding	calponin 1 [Source:MGI Symbol;Acc:MGI:104979]	0.992905	2	6.93521e-28	8.35485e-24
ENSMUSG00000001552	9.50509e-15	-3.86496	-3.08203	-4.64789	5.84515e-13	6.26982	2.32559	Jup	protein_coding	junction plakoglobin [Source:MGI Symbol;Acc:MGI:96650]	0.866692	2	3.30766e-14	3.91131e-10
ENSMUSG00000001604	9.32607e-24	-4.75642	-3.98425	-5.52859	1.3543e-21	5.26177	0.404393	Tcea3	protein_coding	transcription elongation factor A (SII), 3 [Source:MGI Symbol;Acc:MGI:1196908]	0.910941	2	3.0803e-22	3.69144e-18
ENSMUSG00000001663	5.90799e-16	-4.73983	-3.64268	-5.83697	4.04597e-14	5.37488	0.55141	Gstt1	protein_coding	glutathione S-transferase, theta 1 [Source:MGI Symbol;Acc:MGI:107379]	0.831404	2	8.30845e-16	9.87792e-12
ENSMUSG00000001761	2.41808e-13	4.1416	5.10642	3.17678	1.19447e-11	1.59894	5.80258	Smo	protein_coding	smoothened, frizzled class receptor [Source:MGI Symbol;Acc:MGI:108075]	0.698182	1	9.56125e-05	0.966165
ENSMUSG00000002100	1.41713e-44	-8.91724	-8.22243	-9.61204	1.89785e-41	9.98714	0.899604	Mybpc3	protein_coding	myosin binding protein C, cardiac [Source:MGI Symbol;Acc:MGI:102844]	0.993839	2	9.06156e-26	1.09092e-21
ENSMUSG00000003518	1.05391e-08	-3.7993	-2.68156	-4.91704	2.54055e-07	7.09429	3.2209	Dusp3	protein_coding	dual specificity phosphatase 3 (vaccinia virus phosphatase VH1-related) [Source:MGI Symbol;Acc:MGI:1919599]	0.787901	2	2.59528e-09	2.98535e-05
ENSMUSG00000003559	4.56156e-07	-3.1961	-2.09514	-4.29706	7.27255e-06	5.94802	2.7042	As3mt	protein_coding	arsenic (+3 oxidation state) methyltransferase [Source:MGI Symbol;Acc:MGI:1929882]	0.75224	2	1.45964e-07	0.00164253
ENSMUSG00000003848	3.00878e-10	3.53109	4.50132	2.56087	9.41944e-09	2.82103	6.41276	Nob1	protein_coding	NIN1/RPN12 binding protein 1 homolog [Source:MGI Symbol;Acc:MGI:1914869]	0.697565	3	3.73852e-05	0.388432
ENSMUSG00000004044	1.70226e-13	-4.95175	-3.74964	-6.15385	8.73081e-12	6.25241	1.22382	Ptrf	protein_coding	polymerase I and transcript release factor [Source:MGI Symbol;Acc:MGI:1277968]	0.831777	2	1.16802e-13	1.37827e-09
ENSMUSG00000004085	7.35217e-20	-5.27867	-4.32649	-6.23085	7.63929e-18	9.56308	4.18389	Map3k20	protein_coding	mitogen-activated protein kinase kinase kinase 20 [Source:MGI Symbol;Acc:MGI:2443258]	0.930919	2	1.73132e-18	2.06633e-14
ENSMUSG00000004929	1.95105e-08	3.17261	4.21145	2.13376	4.43698e-07	2.14633	5.3707	Thop1	protein_coding	thimet oligopeptidase 1 [Source:MGI Symbol;Acc:MGI:1354165]	0.683636	1	0.000297428	1
ENSMUSG00000004951	8.46006e-29	-5.65298	-4.91692	-6.38904	2.12436e-26	6.24172	0.457826	Hspb1	protein_coding	heat shock protein 1 [Source:MGI Symbol;Acc:MGI:96240]	0.956871	2	7.10591e-26	8.55623e-22
ENSMUSG00000005087	3.46554e-07	-3.43923	-2.22184	-4.65662	5.73766e-06	5.74323	2.2615	Cd44	protein_coding	CD44 antigen [Source:MGI Symbol;Acc:MGI:88338]	0.745612	2	2.12872e-07	0.00238779
ENSMUSG00000005583	3.13482e-21	-5.98892	-5.02809	-6.94976	3.59847e-19	9.51922	3.38662	Mef2c	protein_coding	myocyte enhancer factor 2C [Source:MGI Symbol;Acc:MGI:99458]	0.934839	2	6.39355e-19	7.63774e-15
ENSMUSG00000006221	1.01712e-30	-5.78862	-4.96293	-6.61431	3.04326e-28	6.07612	0.15861	Hspb7	protein_coding	heat shock protein family, member 7 (cardiovascular) [Source:MGI Symbol;Acc:MGI:1352494]	0.952577	2	1.76046e-27	2.12065e-23
ENSMUSG00000006356	1.62855e-23	-6.75833	-5.70547	-7.81118	2.30929e-21	12.0502	5.12106	Crip2	protein_coding	cysteine rich protein 2 [Source:MGI Symbol;Acc:MGI:1915587]	0.972367	2	6.73673e-22	8.06993e-18
ENSMUSG00000006360	2.87426e-33	-6.82314	-6.09032	-7.55596	1.08261e-30	9.00663	2.02642	Crip1	protein_coding	cysteine-rich protein 1 (intestinal) [Source:MGI Symbol;Acc:MGI:88501]	0.980769	2	1.21163e-23	1.45553e-19
ENSMUSG00000006398	3.90792e-10	3.5039	4.56441	2.44339	1.19853e-08	3.38404	6.96817	Cdc20	protein_coding	cell division cycle 20 [Source:MGI Symbol;Acc:MGI:1859866]	0.65375	3	0.00136542	1
ENSMUSG00000006498	1.56696e-21	5.24711	6.18455	4.30966	1.84578e-19	3.21226	8.58997	Ptbp1	protein_coding	polypyrimidine tract binding protein 1 [Source:MGI Symbol;Acc:MGI:97791]	0.785816	3	2.67507e-09	3.07687e-05
ENSMUSG00000006567	7.24454e-17	-4.76475	-3.77698	-5.75252	5.3707e-15	6.44056	1.60996	Atp7b	protein_coding	ATPase, Cu++ transporting, beta polypeptide [Source:MGI Symbol;Acc:MGI:103297]	0.860624	2	1.58902e-14	1.88076e-10
ENSMUSG00000007122	3.41839e-25	-6.93883	-5.85565	-8.02202	6.2427e-23	7.54439	0.481563	Casq1	protein_coding	calsequestrin 1 [Source:MGI Symbol;Acc:MGI:1309468]	0.914768	2	2.09999e-22	2.51746e-18
ENSMUSG00000008136	2.07173e-18	-5.86929	-4.81324	-6.92535	1.84967e-16	7.58659	1.61609	Fhl2	protein_coding	four and a half LIM domains 2 [Source:MGI Symbol;Acc:MGI:1338762]	0.890217	2	2.82215e-17	3.36287e-13
ENSMUSG00000008999	2.23697e-07	-3.1656	-2.1228	-4.2084	3.89065e-06	6.67544	3.44968	Bmp7	protein_coding	bone morphogenetic protein 7 [Source:MGI Symbol;Acc:MGI:103302]	0.761856	2	8.66246e-08	0.000979637
ENSMUSG00000009378	5.0396e-12	-3.07499	-2.07566	-4.07431	2.08736e-10	3.4762	0.327555	Slc16a12	protein_coding	solute carrier family 16 (monocarboxylic acid transporters), member 12 [Source:MGI Symbol;Acc:MGI:2147716]	0.768484	2	5.34589e-13	6.29211e-09
ENSMUSG00000010066	1.57733e-21	-4.80419	-3.94516	-5.66322	1.84578e-19	5.38402	0.504119	Cacna2d2	protein_coding	calcium channel, voltage-dependent, alpha 2/delta subunit 2 [Source:MGI Symbol;Acc:MGI:1929813]	0.889283	2	4.59196e-19	5.48602e-15
ENSMUSG00000010175	3.06492e-11	-3.51554	-2.53958	-4.49151	1.10273e-09	5.00832	1.45498	Prox1	protein_coding	prospero homeobox 1 [Source:MGI Symbol;Acc:MGI:97772]	0.788648	2	1.08035e-09	1.24835e-05
ENSMUSG00000010760	1.22157e-07	3.49394	4.72403	2.26384	2.28627e-06	1.27692	4.80323	Phlda2	protein_coding	pleckstrin homology like domain, family A, member 2 [Source:MGI Symbol;Acc:MGI:1202307]	0.966869	1	2.01937e-24	2.42889e-20
ENSMUSG00000011148	1.68141e-15	-3.54877	-2.58817	-4.50938	1.12589e-13	3.97696	0.343907	Adssl1	protein_coding	adenylosuccinate synthetase like 1 [Source:MGI Symbol;Acc:MGI:87947]	0.817401	2	3.30563e-16	3.93171e-12
ENSMUSG00000011179	1.57714e-11	3.0578	3.89203	2.22356	6.05391e-10	6.02337	9.17709	Odc1	protein_coding	ornithine decarboxylase, structural 1 [Source:MGI Symbol;Acc:MGI:97402]	0.823232	1	2.87428e-10	3.33704e-06
ENSMUSG00000013936	2.97309e-19	-5.81652	-4.53326	-7.09977	2.96154e-17	6.18071	0.273013	Myl2	protein_coding	myosin, light polypeptide 2, regulatory, cardiac, slow [Source:MGI Symbol;Acc:MGI:97272]	0.851942	2	7.76923e-18	9.26636e-14
ENSMUSG00000015365	1.68832e-12	-3.20368	-2.14615	-4.2612	7.48136e-11	3.44223	0.156061	Mov10l1	protein_coding	Moloney leukemia virus 10-like 1 [Source:MGI Symbol;Acc:MGI:1891384]	0.754854	2	2.65505e-13	3.12871e-09
ENSMUSG00000015579	6.54863e-16	-3.1282	-2.45544	-3.80096	4.4343e-14	5.03746	1.86641	Nkx2-5	protein_coding	NK2 homeobox 5 [Source:MGI Symbol;Acc:MGI:97350]	0.863331	2	8.34434e-14	9.85216e-10
ENSMUSG00000015627	1.12673e-07	-3.5207	-2.35547	-4.68593	2.12526e-06	6.01124	2.44002	Gata5	protein_coding	GATA binding protein 5 [Source:MGI Symbol;Acc:MGI:109497]	0.759429	2	4.77309e-08	0.000542366
ENSMUSG00000015880	5.19535e-11	3.74501	4.85375	2.63627	1.82564e-09	3.71982	7.56534	Ncapg	protein_coding	non-SMC condensin I complex, subunit G [Source:MGI Symbol;Acc:MGI:1930197]	0.690404	1	0.000197476	1
ENSMUSG00000015932	9.39133e-21	-2.44238	-2.01845	-2.86632	1.05789e-18	12.306	9.86242	Dstn	protein_coding	destrin [Source:MGI Symbol;Acc:MGI:1929270]	0.956871	2	1.83427e-20	2.19452e-16
ENSMUSG00000015968	8.65796e-24	-5.23882	-4.37615	-6.10149	1.28833e-21	5.73803	0.406575	Cacna1d	protein_coding	calcium channel, voltage-dependent, L type, alpha 1D subunit [Source:MGI Symbol;Acc:MGI:88293]	0.909447	2	1.14381e-21	1.36982e-17
ENSMUSG00000016087	3.55144e-12	3.70729	4.49716	2.91742	1.50724e-10	0.330284	4.08514	Fli1	protein_coding	Friend leukemia integration 1 [Source:MGI Symbol;Acc:MGI:95554]	0.735051	1	6.79826e-07	0.00754131
ENSMUSG00000016386	1.8068e-14	-4.92354	-3.78631	-6.06077	1.05715e-12	7.6733	2.68155	Mpped2	protein_coding	metallophosphoesterase domain containing 2 [Source:MGI Symbol;Acc:MGI:1924265]	0.847647	2	4.59493e-13	5.41053e-09
ENSMUSG00000017493	8.96507e-12	3.58647	4.56467	2.60826	3.61391e-10	3.73308	7.4137	Igfbp4	protein_coding	insulin-like growth factor binding protein 4 [Source:MGI Symbol;Acc:MGI:96439]	0.643434	1	0.00513011	1
ENSMUSG00000018263	3.94433e-08	-3.47452	-2.32405	-4.625	8.35519e-07	5.81597	2.28242	Tbx5	protein_coding	T-box 5 [Source:MGI Symbol;Acc:MGI:102541]	0.76475	2	2.38241e-08	0.000271786
ENSMUSG00000018339	2.67153e-26	-4.23408	-3.55818	-4.90997	5.64911e-24	11.6955	7.36423	Gpx3	protein_coding	glutathione peroxidase 3 [Source:MGI Symbol;Acc:MGI:105102]	0.979089	2	2.41288e-22	2.89207e-18
ENSMUSG00000018340	5.20507e-12	-4.38017	-3.32084	-5.4395	2.14852e-10	8.72928	4.26081	Anxa6	protein_coding	annexin A6 [Source:MGI Symbol;Acc:MGI:88255]	0.8427	2	3.156e-12	3.70104e-08
ENSMUSG00000018427	9.2108e-12	-3.54906	-2.5294	-4.56871	3.70059e-10	4.43805	0.821638	Ypel2	protein_coding	yippee-like 2 (Drosophila) [Source:MGI Symbol;Acc:MGI:1925114]	0.79873	2	1.3658e-12	1.60468e-08
ENSMUSG00000018796	6.30143e-11	-3.56525	-2.54889	-4.5816	2.1825e-09	4.6633	1.04211	Acsl1	protein_coding	acyl-CoA synthetase long-chain family member 1 [Source:MGI Symbol;Acc:MGI:102797]	0.79705	2	2.16592e-11	2.5298e-07
ENSMUSG00000018845	5.21795e-43	-8.85853	-8.20519	-9.51187	5.71745e-40	9.73024	0.675843	Unc45b	protein_coding	unc-45 myosin chaperone B [Source:MGI Symbol;Acc:MGI:2443377]	0.995892	2	5.0549e-28	6.09015e-24
ENSMUSG00000019528	3.15046e-24	-4.87698	-4.08853	-5.66543	4.99639e-22	12.68	7.71748	Gyg	protein_coding	glycogenin [Source:MGI Symbol;Acc:MGI:1351614]	0.987304	2	4.63131e-23	5.55803e-19
ENSMUSG00000019773	2.25968e-09	3.67906	4.77387	2.58424	6.16198e-08	3.40933	7.15932	Fbxo5	protein_coding	F-box protein 5 [Source:MGI Symbol;Acc:MGI:1914391]	0.647879	1	0.00380207	1
ENSMUSG00000019787	8.82355e-22	-4.0994	-3.21948	-4.97933	1.07425e-19	4.30668	0.0919647	Trdn	protein_coding	triadin [Source:MGI Symbol;Acc:MGI:1924007]	0.857356	2	4.17798e-21	5.00146e-17
ENSMUSG00000019817	1.31751e-09	-3.80396	-2.73295	-4.87497	3.72768e-08	8.30153	4.42627	Plagl1	protein_coding	pleiomorphic adenoma gene-like 1 [Source:MGI Symbol;Acc:MGI:1100874]	0.794996	2	2.08067e-09	2.3961e-05
ENSMUSG00000020155	1.13347e-19	-4.61659	-3.67325	-5.55993	1.15777e-17	5.07469	0.359771	Kcnmb1	protein_coding	potassium large conductance calcium-activated channel, subfamily M, beta member 1 [Source:MGI Symbol;Acc:MGI:1334203]	0.866972	2	1.72652e-19	2.06388e-15
ENSMUSG00000020186	3.37956e-23	-3.9454	-3.24397	-4.64683	4.57684e-21	10.6818	6.62312	Csrp2	protein_coding	cysteine and glycine-rich protein 2 [Source:MGI Symbol;Acc:MGI:1202907]	0.960978	2	8.26659e-21	9.89263e-17
ENSMUSG00000020388	4.60896e-12	3.17162	3.97056	2.37267	1.92221e-10	0.428192	3.67659	Pdlim4	protein_coding	PDZ and LIM domain 4 [Source:MGI Symbol;Acc:MGI:1353470]	0.678102	3	5.37954e-05	0.553501
ENSMUSG00000020469	7.51001e-52	-8.79725	-8.01591	-9.57859	2.26295e-48	14.2233	5.29971	Myl7	protein_coding	myosin, light polypeptide 7, regulatory [Source:MGI Symbol;Acc:MGI:107495]	0.999253	2	3.96288e-24	4.76338e-20
ENSMUSG00000020475	2.92317e-37	-9.33964	-8.47829	-10.201	1.95738e-34	10.2198	0.684829	Pgam2	protein_coding	phosphoglycerate mutase 2 [Source:MGI Symbol;Acc:MGI:1933118]	0.975355	2	2.05616e-27	2.47644e-23
ENSMUSG00000020534	6.01231e-08	3.27644	4.39951	2.15338	1.21181e-06	3.38941	6.73121	Shmt1	protein_coding	serine hydroxymethyltransferase 1 (soluble) [Source:MGI Symbol;Acc:MGI:98299]	0.638642	3	0.00383029	1
ENSMUSG00000020542	1.53589e-37	-8.62206	-7.85688	-9.38725	1.08894e-34	9.53379	0.731277	Myocd	protein_coding	myocardin [Source:MGI Symbol;Acc:MGI:2137495]	0.977035	2	1.4058e-26	1.693e-22
ENSMUSG00000020589	2.37061e-17	-5.765	-4.59931	-6.93068	1.86751e-15	6.95337	1.09935	Fam49a	protein_coding	family with sequence similarity 49, member A [Source:MGI Symbol;Acc:MGI:1261783]	0.869679	2	1.74858e-16	2.08029e-12
ENSMUSG00000020592	1.41437e-12	4.08912	5.03306	3.14518	6.31383e-11	1.45444	5.61423	Sdc1	protein_coding	syndecan 1 [Source:MGI Symbol;Acc:MGI:1349162]	0.737469	3	4.51044e-07	0.00502463
ENSMUSG00000020649	8.51177e-13	2.85413	3.59088	2.11739	3.90085e-11	7.75382	10.6993	Rrm2	protein_coding	ribonucleotide reductase M2 [Source:MGI Symbol;Acc:MGI:98181]	0.682222	1	0.000379722	1
ENSMUSG00000021057	1.53403e-14	-5.22201	-4.1317	-6.31232	9.1082e-13	8.67762	3.3447	Akap5	protein_coding	A kinase (PRKA) anchor protein 5 [Source:MGI Symbol;Acc:MGI:2685104]	0.869399	2	3.68253e-14	4.35348e-10
ENSMUSG00000021193	1.34004e-07	3.02659	4.043	2.01019	2.48103e-06	3.97765	7.05779	Pitrm1	protein_coding	pitrilysin metallepetidase 1 [Source:MGI Symbol;Acc:MGI:1916867]	0.741616	1	2.39237e-06	0.0261055
ENSMUSG00000021196	6.00614e-16	-4.97041	-3.85577	-6.08505	4.08994e-14	7.44872	2.42199	Pfkp	protein_coding	phosphofructokinase, platelet [Source:MGI Symbol;Acc:MGI:1891833]	0.846714	2	7.81589e-13	9.19148e-09
ENSMUSG00000021200	3.36667e-32	-7.18926	-6.34047	-8.03805	1.06785e-29	7.57011	0.226653	Asb2	protein_coding	ankyrin repeat and SOCS box-containing 2 [Source:MGI Symbol;Acc:MGI:1929743]	0.95463	2	2.04029e-27	2.45753e-23
ENSMUSG00000021203	5.1082e-09	-3.20883	-2.1302	-4.28747	1.30443e-07	4.06791	0.811678	Otub2	protein_coding	OTU domain, ubiquitin aldehyde binding 2 [Source:MGI Symbol;Acc:MGI:1915399]	0.738798	2	1.0052e-08	0.000115116
ENSMUSG00000021221	2.16792e-14	-4.00771	-3.10504	-4.91039	1.25024e-12	5.22917	1.1587	Dpf3	protein_coding	D4, zinc and double PHD fingers, family 3 [Source:MGI Symbol;Acc:MGI:1917377]	0.850915	2	2.47641e-14	2.92885e-10
ENSMUSG00000021250	1.69589e-11	-3.14934	-2.05867	-4.24	6.44811e-10	3.45927	0.218748	Fos	protein_coding	FBJ osteosarcoma oncogene [Source:MGI Symbol;Acc:MGI:95574]	0.742252	2	1.97677e-12	2.32054e-08
ENSMUSG00000021313	7.4743e-30	-7.19882	-6.3394	-8.05825	2.04745e-27	8.43647	1.10588	Ryr2	protein_coding	ryanodine receptor 2, cardiac [Source:MGI Symbol;Acc:MGI:99685]	0.959298	2	1.08437e-22	1.30103e-18
ENSMUSG00000021318	1.87041e-18	5.02557	5.97594	4.07521	1.68239e-16	2.28006	7.39932	Gli3	protein_coding	GLI-Kruppel family member GLI3 [Source:MGI Symbol;Acc:MGI:95729]	0.743601	3	3.87039e-07	0.00431896
ENSMUSG00000021373	2.46602e-25	-5.59909	-4.84833	-6.34986	4.64422e-23	7.71224	1.97962	Cap2	protein_coding	CAP, adenylate cyclase-associated protein, 2 (yeast) [Source:MGI Symbol;Acc:MGI:1914502]	0.946975	2	1.68947e-20	2.02145e-16
ENSMUSG00000021474	4.83702e-17	4.05434	4.91364	3.19504	3.66671e-15	3.34948	7.51064	Sfxn1	protein_coding	sideroflexin 1 [Source:MGI Symbol;Acc:MGI:2137677]	0.677576	1	0.000530857	1
ENSMUSG00000021493	1.94421e-21	-4.28527	-3.52229	-5.04825	2.25323e-19	9.56851	5.15409	Pdlim7	protein_coding	PDZ and LIM domain 7 [Source:MGI Symbol;Acc:MGI:1914649]	0.95295	2	3.41263e-20	4.08116e-16
ENSMUSG00000021614	2.94408e-11	-3.06871	-2.26069	-3.87674	1.06561e-09	11.0966	7.95021	Vcan	protein_coding	versican [Source:MGI Symbol;Acc:MGI:102889]	0.863518	2	1.62225e-13	1.91329e-09
ENSMUSG00000021702	4.61232e-24	-5.97612	-4.91934	-7.03289	7.12721e-22	6.33858	0.245837	Thbs4	protein_coding	thrombospondin 4 [Source:MGI Symbol;Acc:MGI:1101779]	0.900112	2	1.36198e-22	1.63356e-18
ENSMUSG00000021798	4.3399e-37	-7.59969	-6.85682	-8.34256	2.61544e-34	8.71817	0.983586	Ldb3	protein_coding	LIM domain binding 3 [Source:MGI Symbol;Acc:MGI:1344412]	0.974701	2	3.12217e-24	3.7541e-20
ENSMUSG00000021838	1.98426e-15	-4.3273	-3.36641	-5.2882	1.3069e-13	5.40158	1.00383	Samd4	protein_coding	sterile alpha motif domain containing 4 [Source:MGI Symbol;Acc:MGI:1921730]	0.855116	2	4.78382e-15	5.67313e-11
ENSMUSG00000021939	5.40215e-08	-2.92798	-2.00839	-3.84757	1.10173e-06	9.51966	6.47553	Ctsb	protein_coding	cathepsin B [Source:MGI Symbol;Acc:MGI:88561]	0.786968	2	5.70946e-09	6.55103e-05
ENSMUSG00000021957	2.12923e-13	3.9223	4.83668	3.00792	1.06932e-11	1.91827	5.91273	Tkt	protein_coding	transketolase [Source:MGI Symbol;Acc:MGI:105992]	0.696498	3	3.7645e-05	0.391094
ENSMUSG00000022033	3.15973e-07	3.10848	4.17328	2.04368	5.30422e-06	3.65083	6.81039	Pbk	protein_coding	PDZ binding kinase [Source:MGI Symbol;Acc:MGI:1289156]	0.664504	3	0.00060707	1
ENSMUSG00000022199	4.8718e-11	-3.67726	-2.627	-4.72753	1.72199e-09	4.85589	1.11377	Slc22a17	protein_coding	solute carrier family 22 (organic cation transporter), member 17 [Source:MGI Symbol;Acc:MGI:1926225]	0.801158	2	6.35801e-12	7.44333e-08
ENSMUSG00000022215	2.02967e-17	-4.3855	-3.37578	-5.39523	1.60945e-15	4.72757	0.247407	Fitm1	protein_coding	fat storage-inducing transmembrane protein 1 [Source:MGI Symbol;Acc:MGI:1915930]	0.820482	2	5.27205e-17	6.28007e-13
ENSMUSG00000022246	2.72447e-11	3.53446	4.35373	2.71518	9.92087e-10	0.710375	4.28922	Rai14	protein_coding	retinoic acid induced 14 [Source:MGI Symbol;Acc:MGI:1922896]	0.709474	3	5.30753e-06	0.0572735
ENSMUSG00000022272	5.81334e-08	3.32351	4.41677	2.23026	1.17564e-06	2.64132	6.02255	Myo10	protein_coding	myosin X [Source:MGI Symbol;Acc:MGI:107716]	0.770101	1	1.04909e-07	0.00118401
ENSMUSG00000022309	2.74588e-13	-4.50532	-3.4298	-5.58084	1.32916e-11	5.968	1.3948	Angpt1	protein_coding	angiopoietin 1 [Source:MGI Symbol;Acc:MGI:108448]	0.834765	2	3.53741e-13	4.16707e-09
ENSMUSG00000022346	2.05795e-22	5.24335	5.92186	4.56484	2.63877e-20	0.234333	5.54289	Myc	protein_coding	myelocytomatosis oncogene [Source:MGI Symbol;Acc:MGI:97250]	0.771919	1	3.56522e-08	0.000405971
ENSMUSG00000022358	1.24172e-36	-7.40823	-6.58479	-8.23167	7.12688e-34	8.17079	0.657542	Fbxo32	protein_coding	F-box protein 32 [Source:MGI Symbol;Acc:MGI:1914981]	0.953417	2	1.16074e-22	1.39242e-18
ENSMUSG00000022483	8.91375e-18	-5.52589	-4.49928	-6.55251	7.30867e-16	7.50008	1.88458	Col2a1	protein_coding	collagen, type II, alpha 1 [Source:MGI Symbol;Acc:MGI:88452]	0.884989	2	4.19818e-16	4.99205e-12
ENSMUSG00000022490	7.26312e-17	-4.14545	-3.31693	-4.97397	5.3707e-15	5.06947	0.850065	Ppp1r1a	protein_coding	protein phosphatase 1, regulatory (inhibitor) subunit 1A [Source:MGI Symbol;Acc:MGI:1889595]	0.866131	2	1.1837e-16	1.40919e-12
ENSMUSG00000022500	6.61921e-08	3.36489	4.47212	2.25765	1.32307e-06	3.18812	6.61226	Litaf	protein_coding	LPS-induced TN factor [Source:MGI Symbol;Acc:MGI:1929512]	0.637475	1	0.00709233	1
ENSMUSG00000022708	4.70237e-17	-4.85033	-3.86029	-5.84038	3.58719e-15	6.19128	1.27585	Zbtb20	protein_coding	zinc finger and BTB domain containing 20 [Source:MGI Symbol;Acc:MGI:1929213]	0.862584	2	7.54451e-15	8.94176e-11
ENSMUSG00000022799	2.08439e-13	-4.40913	-3.41148	-5.40678	1.05118e-11	6.16785	1.6751	Arhgap31	protein_coding	Rho GTPase activating protein 31 [Source:MGI Symbol;Acc:MGI:1333857]	0.832711	2	4.91787e-13	5.7898e-09
ENSMUSG00000022803	6.44256e-35	-7.54916	-6.74847	-8.34986	2.98662e-32	10.1613	2.44061	Popdc2	protein_coding	popeye domain containing 2 [Source:MGI Symbol;Acc:MGI:1930150]	0.985063	2	8.40876e-24	1.01031e-19
ENSMUSG00000022814	5.41963e-11	3.60093	4.69407	2.50779	1.89892e-09	5.15259	8.87614	Umps	protein_coding	uridine monophosphate synthetase [Source:MGI Symbol;Acc:MGI:1298388]	0.658384	1	0.00199716	1
ENSMUSG00000023092	7.80797e-10	-3.39574	-2.30132	-4.49016	2.28421e-08	9.22186	5.78377	Fhl1	protein_coding	four and a half LIM domains 1 [Source:MGI Symbol;Acc:MGI:1298387]	0.805078	2	5.78374e-10	6.69989e-06
ENSMUSG00000023830	4.93442e-20	-2.48836	-2.04606	-2.93066	5.1717e-18	11.4587	8.96907	Igf2r	protein_coding	insulin-like growth factor 2 receptor [Source:MGI Symbol;Acc:MGI:96435]	0.93764	2	6.61265e-19	7.89881e-15
ENSMUSG00000023904	1.23217e-21	-5.18055	-4.35714	-6.00396	1.47043e-19	7.98518	2.69943	Hcfc1r1	protein_coding	host cell factor C1 regulator 1 (XPO1-dependent) [Source:MGI Symbol;Acc:MGI:2663619]	0.925784	2	2.02809e-18	2.42032e-14
ENSMUSG00000024008	6.4703e-14	-3.26699	-2.32201	-4.21197	3.54484e-12	3.61449	0.287239	Cpne5	protein_coding	copine V [Source:MGI Symbol;Acc:MGI:2385908]	0.802558	2	1.8781e-14	2.22197e-10
ENSMUSG00000024042	7.68585e-14	-2.88144	-2.23618	-3.52669	4.09901e-12	5.98649	3.03545	Sik1	protein_coding	salt inducible kinase 1 [Source:MGI Symbol;Acc:MGI:104754]	0.848581	2	1.47606e-12	1.73392e-08
ENSMUSG00000024049	2.48785e-36	-7.6673	-6.86928	-8.46532	1.30374e-33	8.35715	0.565298	Myom1	protein_coding	myomesin 1 [Source:MGI Symbol;Acc:MGI:1341430]	0.964339	2	2.50624e-24	3.014e-20
ENSMUSG00000024063	1.13981e-11	-3.27133	-2.3699	-4.17275	4.5043e-10	4.16898	0.845593	Lbh	protein_coding	limb-bud and heart [Source:MGI Symbol;Acc:MGI:1925139]	0.804892	2	4.29433e-12	5.03253e-08
ENSMUSG00000024078	3.38293e-07	2.96096	3.91117	2.01074	5.61631e-06	1.90544	4.89954	Ttc27	protein_coding	tetratricopeptide repeat domain 27 [Source:MGI Symbol;Acc:MGI:1921446]	0.74	1	1.96549e-06	0.0215005
ENSMUSG00000024236	4.38503e-19	-4.79511	-3.91824	-5.67197	4.22822e-17	7.46956	2.60193	Svil	protein_coding	supervillin [Source:MGI Symbol;Acc:MGI:2147319]	0.890963	2	1.3184e-15	1.56626e-11
ENSMUSG00000024565	2.0438e-10	3.36342	4.16015	2.56669	6.46559e-09	0.358969	3.76214	Sall3	protein_coding	sal-like 3 (Drosophila) [Source:MGI Symbol;Acc:MGI:109295]	0.828889	1	2.20837e-12	2.59152e-08
ENSMUSG00000024620	1.30654e-14	3.62469	4.31654	2.93284	7.91345e-13	0.486658	4.15038	Pdgfrb	protein_coding	platelet derived growth factor receptor, beta polypeptide [Source:MGI Symbol;Acc:MGI:97531]	0.748845	3	8.42128e-08	0.000952616
ENSMUSG00000024640	7.24805e-10	3.4275	4.45274	2.40226	2.14646e-08	4.43008	7.94154	Psat1	protein_coding	phosphoserine aminotransferase 1 [Source:MGI Symbol;Acc:MGI:2183441]	0.740579	3	5.56611e-07	0.0061884
ENSMUSG00000024785	3.73906e-08	3.18978	4.17477	2.20479	7.97643e-07	1.71644	4.95496	Rcl1	protein_coding	RNA terminal phosphate cyclase-like 1 [Source:MGI Symbol;Acc:MGI:1913275]	0.733131	1	3.28291e-06	0.0356688
ENSMUSG00000024795	2.52888e-10	3.26133	4.28959	2.23306	7.97922e-09	3.9038	7.26492	Kif20b	protein_coding	kinesin family member 20B [Source:MGI Symbol;Acc:MGI:2444576]	0.71404	1	2.94176e-05	0.307414
ENSMUSG00000024803	2.55214e-48	-9.1025	-8.30139	-9.90361	5.12682e-45	10.7621	1.53462	Ankrd1	protein_coding	ankyrin repeat domain 1 (cardiac muscle) [Source:MGI Symbol;Acc:MGI:1097717]	0.980583	2	4.52399e-23	5.42969e-19
ENSMUSG00000024937	3.84782e-20	-4.90413	-3.97255	-5.83572	4.10422e-18	5.57788	0.601887	Ehbp1l1	protein_coding	EH domain binding protein 1-like 1 [Source:MGI Symbol;Acc:MGI:3612340]	0.876027	2	1.29849e-17	1.54806e-13
ENSMUSG00000025006	1.00728e-09	-3.28741	-2.3044	-4.27041	2.89756e-08	4.74047	1.39861	Sorbs1	protein_coding	sorbin and SH3 domain containing 1 [Source:MGI Symbol;Acc:MGI:700014]	0.790329	2	1.98429e-10	2.30634e-06
ENSMUSG00000025010	7.47557e-08	3.4714	4.60223	2.34056	1.46509e-06	2.86962	6.39815	Ccnj	protein_coding	cyclin J [Source:MGI Symbol;Acc:MGI:2443297]	0.701031	3	2.53859e-05	0.266197
ENSMUSG00000025104	1.20361e-08	3.25439	4.20676	2.30201	2.87269e-07	1.80769	5.10225	Hdgfrp3	protein_coding	hepatoma-derived growth factor, related protein 3 [Source:MGI Symbol;Acc:MGI:1352760]	0.813544	3	4.35238e-11	5.07749e-07
ENSMUSG00000025161	1.39996e-09	-2.83193	-2.03855	-3.62531	3.93327e-08	6.87951	3.95319	Slc16a3	protein_coding	solute carrier family 16 (monocarboxylic acid transporters), member 3 [Source:MGI Symbol;Acc:MGI:1933438]	0.792196	2	2.89388e-09	3.3271e-05
ENSMUSG00000025278	1.26684e-08	3.38011	4.36183	2.3984	2.99986e-07	1.97681	5.40312	Flnb	protein_coding	filamin, beta [Source:MGI Symbol;Acc:MGI:2446089]	0.703636	1	5.62114e-05	0.577853
ENSMUSG00000025451	3.53965e-19	2.64107	3.12421	2.15793	3.497e-17	6.83555	9.47792	Paip1	protein_coding	polyadenylate binding protein-interacting protein 1 [Source:MGI Symbol;Acc:MGI:2384993]	0.713651	3	8.88148e-06	0.0951029
ENSMUSG00000025574	2.50926e-11	3.98066	5.02393	2.93739	9.22078e-10	2.47833	6.53413	Tk1	protein_coding	thymidine kinase 1 [Source:MGI Symbol;Acc:MGI:98763]	0.719161	3	4.34629e-06	0.0470181
ENSMUSG00000025626	1.63316e-08	2.95803	3.89132	2.02475	3.76961e-07	4.88569	7.89427	Phf6	protein_coding	PHD finger protein 6 [Source:MGI Symbol;Acc:MGI:1918248]	0.676591	3	0.000240624	1
ENSMUSG00000025665	6.50208e-10	3.69285	4.74866	2.63703	1.94949e-08	3.94835	7.69871	Rps6ka6	protein_coding	ribosomal protein S6 kinase polypeptide 6 [Source:MGI Symbol;Acc:MGI:1914321]	0.759394	1	4.04351e-07	0.00450973
ENSMUSG00000025732	3.42045e-11	-3.74729	-2.71636	-4.77822	1.22334e-09	5.13145	1.32779	Fam195a	protein_coding	family with sequence similarity 195, member A [Source:MGI Symbol;Acc:MGI:1915491]	0.791449	2	7.11855e-11	8.2924e-07
ENSMUSG00000025790	2.43025e-11	-3.72763	-2.73937	-4.71589	8.95774e-10	5.16027	1.37737	Slco3a1	protein_coding	solute carrier organic anion transporter family, member 3a1 [Source:MGI Symbol;Acc:MGI:1351867]	0.810866	2	1.64795e-11	1.92613e-07
ENSMUSG00000025791	2.35483e-09	-3.52973	-2.52776	-4.53169	6.33006e-08	8.78937	5.13851	Pgm2	protein_coding	phosphoglucomutase 2 [Source:MGI Symbol;Acc:MGI:97565]	0.810306	2	2.87012e-10	3.3325e-06
ENSMUSG00000025813	1.36058e-11	-4.19256	-3.15487	-5.23024	5.32437e-10	6.65114	2.39008	Homer2	protein_coding	homer scaffolding protein 2 [Source:MGI Symbol;Acc:MGI:1347354]	0.820015	2	2.38151e-11	2.78089e-07
ENSMUSG00000026036	1.43318e-10	3.1825	4.23979	2.12521	4.66868e-09	3.59917	6.88239	Nif3l1	protein_coding	Ngg1 interacting factor 3-like 1 (S. pombe) [Source:MGI Symbol;Acc:MGI:1929485]	0.651173	3	0.00165297	1
ENSMUSG00000026134	8.38743e-07	3.09452	4.1496	2.03944	1.245e-05	2.48298	5.62132	Prim2	protein_coding	DNA primase, p58 subunit [Source:MGI Symbol;Acc:MGI:97758]	0.701414	1	6.77092e-05	0.692123
ENSMUSG00000026163	9.26931e-24	-5.68501	-4.82557	-6.54446	1.3543e-21	6.55811	0.768917	Sphkap	protein_coding	SPHK1 interactor, AKAP domain containing [Source:MGI Symbol;Acc:MGI:1924879]	0.919903	2	5.89371e-21	7.05419e-17
ENSMUSG00000026185	6.59331e-12	-4.62029	-3.51229	-5.7283	2.71226e-10	9.26485	4.49192	Igfbp5	protein_coding	insulin-like growth factor binding protein 5 [Source:MGI Symbol;Acc:MGI:96440]	0.815907	2	1.0606e-10	1.23465e-06
ENSMUSG00000026192	1.37413e-11	2.9333	3.72831	2.1383	5.36001e-10	4.89214	7.86978	Atic	protein_coding	5-aminoimidazole-4-carboxamide ribonucleotide formyltransferase/IMP cyclohydrolase [Source:MGI Symbol;Acc:MGI:1351352]	0.665253	1	0.00126945	1
ENSMUSG00000026193	1.81404e-12	3.55883	4.48263	2.63503	7.97978e-11	5.48062	9.1445	Fn1	protein_coding	fibronectin 1 [Source:MGI Symbol;Acc:MGI:95566]	0.779596	1	4.92422e-08	0.000559293
ENSMUSG00000026207	6.07509e-09	-3.07467	-2.17692	-3.97242	1.51915e-07	6.02755	2.90088	Speg	protein_coding	SPEG complex locus [Source:MGI Symbol;Acc:MGI:109282]	0.789955	2	2.72513e-09	3.1339e-05
ENSMUSG00000026208	1.11459e-19	-5.49092	-4.53558	-6.44626	1.14822e-17	8.15272	2.57061	Des	protein_coding	desmin [Source:MGI Symbol;Acc:MGI:94885]	0.9059	2	6.58734e-17	7.84552e-13
ENSMUSG00000026308	1.7562e-18	-3.92365	-2.85635	-4.99095	1.59154e-16	4.22438	0.162399	Klhl30	protein_coding	kelch-like 30 [Source:MGI Symbol;Acc:MGI:1918038]	0.814414	2	6.5486e-18	7.81117e-14
ENSMUSG00000026335	4.49366e-36	-5.13463	-4.51487	-5.75439	2.25675e-33	9.59618	4.37331	Pam	protein_coding	peptidylglycine alpha-amidating monooxygenase [Source:MGI Symbol;Acc:MGI:97475]	0.974608	2	5.84382e-22	7.0009e-18
ENSMUSG00000026414	4.61541e-52	-9.63439	-8.88909	-10.3797	1.85432e-48	11.9589	2.15452	Tnnt2	protein_coding	troponin T2, cardiac [Source:MGI Symbol;Acc:MGI:104597]	0.99888	2	1.50959e-24	1.81619e-20
ENSMUSG00000026418	1.24624e-32	-8.62457	-7.57691	-9.67223	4.17247e-30	13.2492	4.42496	Tnni1	protein_coding	troponin I, skeletal, slow 1 [Source:MGI Symbol;Acc:MGI:105073]	0.998133	2	2.3288e-24	2.80085e-20
ENSMUSG00000026430	1.33285e-25	-6.42554	-5.42978	-7.4213	2.63359e-23	6.94202	0.399991	Rassf5	protein_coding	Ras association (RalGDS/AF-6) domain family member 5 [Source:MGI Symbol;Acc:MGI:1926375]	0.915235	2	1.13508e-22	1.36175e-18
ENSMUSG00000026447	3.37906e-12	-4.01324	-2.99956	-5.02691	1.43914e-10	7.052	2.9786	Pik3c2b	protein_coding	phosphoinositide-3-kinase, class 2, beta polypeptide [Source:MGI Symbol;Acc:MGI:2685045]	0.833084	2	6.49692e-12	7.60464e-08
ENSMUSG00000026494	8.09552e-08	-3.07986	-2.03192	-4.1278	1.57126e-06	5.21852	2.10338	Kif26b	protein_coding	kinesin family member 26B [Source:MGI Symbol;Acc:MGI:2447076]	0.75112	2	1.5228e-07	0.00171315
ENSMUSG00000026564	3.34729e-14	-3.87941	-2.86469	-4.89413	1.88527e-12	4.56569	0.61266	Dusp27	protein_coding	dual specificity phosphatase 27 (putative) [Source:MGI Symbol;Acc:MGI:2685055]	0.822909	2	9.27261e-15	1.09871e-10
ENSMUSG00000026576	1.54508e-36	-7.11529	-6.41361	-7.81698	8.46491e-34	8.35904	1.11094	Atp1b1	protein_coding	ATPase, Na+/K+ transporting, beta 1 polypeptide [Source:MGI Symbol;Acc:MGI:88108]	0.977315	2	1.75686e-24	2.11333e-20
ENSMUSG00000026610	1.87339e-17	-3.65001	-2.70786	-4.59217	1.50533e-15	3.94414	0.213828	Esrrg	protein_coding	estrogen-related receptor gamma [Source:MGI Symbol;Acc:MGI:1347056]	0.835418	2	6.40661e-18	7.64244e-14
ENSMUSG00000026669	1.94249e-13	4.31489	5.2482	3.38159	9.8373e-12	2.01945	6.38262	Mcm10	protein_coding	minichromosome maintenance 10 replication initiation factor [Source:MGI Symbol;Acc:MGI:1917274]	0.73107	3	1.34486e-06	0.0147975
ENSMUSG00000026683	1.14624e-06	3.14556	4.24396	2.04716	1.64668e-05	2.60025	5.7948	Nuf2	protein_coding	NUF2, NDC80 kinetochore complex component [Source:MGI Symbol;Acc:MGI:1914227]	0.697677	1	9.08213e-05	0.919112
ENSMUSG00000026817	6.2535e-25	-6.65411	-5.68414	-7.62408	1.10843e-22	9.70049	2.92524	Ak1	protein_coding	adenylate kinase 1 [Source:MGI Symbol;Acc:MGI:87977]	0.95435	2	1.08234e-20	1.29513e-16
ENSMUSG00000026888	3.6397e-20	-4.84766	-3.95615	-5.73916	3.9169e-18	5.61388	0.68064	Grb14	protein_coding	growth factor receptor bound protein 14 [Source:MGI Symbol;Acc:MGI:1355324]	0.896565	2	2.87114e-19	3.4313e-15
ENSMUSG00000027111	9.93263e-12	-4.17081	-3.03368	-5.30794	3.96417e-10	5.40766	1.18159	Itga6	protein_coding	integrin alpha 6 [Source:MGI Symbol;Acc:MGI:96605]	0.793409	2	6.23046e-11	7.26222e-07
ENSMUSG00000027177	7.64678e-13	-4.1512	-3.19587	-5.10653	3.51781e-11	7.21302	2.98769	Hipk3	protein_coding	homeodomain interacting protein kinase 3 [Source:MGI Symbol;Acc:MGI:1314882]	0.837005	2	5.43763e-12	6.3691e-08
ENSMUSG00000027217	1.10276e-14	-3.09847	-2.2103	-3.98664	6.71289e-13	4.02168	0.858142	Tspan18	protein_coding	tetraspanin 18 [Source:MGI Symbol;Acc:MGI:1917186]	0.830844	2	5.60668e-14	6.6243e-10
ENSMUSG00000027247	5.2125e-09	-2.90868	-2.04971	-3.76764	1.32545e-07	9.51372	6.49821	Arhgap1	protein_coding	Rho GTPase activating protein 1 [Source:MGI Symbol;Acc:MGI:2445003]	0.818895	2	9.66451e-11	1.12524e-06
ENSMUSG00000027276	3.00426e-15	-4.66689	-3.70333	-5.63044	1.92608e-13	9.71449	4.91424	Jag1	protein_coding	jagged 1 [Source:MGI Symbol;Acc:MGI:1095416]	0.879201	2	1.26469e-14	1.49764e-10
ENSMUSG00000027293	8.30437e-15	-4.41871	-3.42801	-5.4094	5.15941e-13	6.06651	1.59064	Ehd4	protein_coding	EH-domain containing 4 [Source:MGI Symbol;Acc:MGI:1919619]	0.841206	2	5.695e-13	6.7013e-09
ENSMUSG00000027361	2.69303e-07	3.01795	4.03371	2.00219	4.59761e-06	2.40313	5.46457	Gabpb1	protein_coding	GA repeat binding protein, beta 1 [Source:MGI Symbol;Acc:MGI:95611]	0.71899	1	1.68465e-05	0.178287
ENSMUSG00000027379	1.44243e-08	3.05149	4.05381	2.04917	3.3693e-07	4.57128	7.68291	Bub1	protein_coding	BUB1, mitotic checkpoint serine/threonine kinase [Source:MGI Symbol;Acc:MGI:1100510]	0.695876	3	4.5673e-05	0.471802
ENSMUSG00000027478	2.86317e-07	3.18469	4.24029	2.1291	4.8537e-06	2.69504	5.92588	Dnmt3b	protein_coding	DNA methyltransferase 3B [Source:MGI Symbol;Acc:MGI:1261819]	0.832929	1	5.87428e-11	6.84824e-07
ENSMUSG00000027533	2.96139e-13	3.29862	4.1666	2.43064	1.42775e-11	4.96941	8.35667	Fabp5	protein_coding	fatty acid binding protein 5, epidermal [Source:MGI Symbol;Acc:MGI:101790]	0.795592	3	7.82336e-10	9.05398e-06
ENSMUSG00000027858	4.01849e-08	-3.24334	-2.2231	-4.26358	8.48247e-07	5.74818	2.45371	Tspan2	protein_coding	tetraspanin 2 [Source:MGI Symbol;Acc:MGI:1917997]	0.767924	2	2.66705e-08	0.00030415
ENSMUSG00000027955	6.12791e-10	-3.60791	-2.51883	-4.69698	1.84189e-08	4.71956	1.0548	Fam198b	protein_coding	family with sequence similarity 198, member B [Source:MGI Symbol;Acc:MGI:1915909]	0.769417	2	3.8323e-10	4.44508e-06
ENSMUSG00000027961	8.52123e-25	-5.26511	-4.35323	-6.17699	1.46723e-22	6.12515	0.799053	Lrrc39	protein_coding	leucine rich repeat containing 39 [Source:MGI Symbol;Acc:MGI:1924557]	0.881628	2	1.36691e-16	1.62676e-12
ENSMUSG00000027962	3.51116e-08	-3.42755	-2.19734	-4.65776	7.51687e-07	4.7522	1.26454	Vcam1	protein_coding	vascular cell adhesion molecule 1 [Source:MGI Symbol;Acc:MGI:98926]	0.749813	2	6.43696e-09	7.38319e-05
ENSMUSG00000028194	4.68239e-08	-3.11688	-2.10484	-4.12892	9.69706e-07	8.02579	4.78667	Ddah1	protein_coding	dimethylarginine dimethylaminohydrolase 1 [Source:MGI Symbol;Acc:MGI:1916469]	0.739544	2	1.08975e-06	0.0120232
ENSMUSG00000028273	3.02668e-29	-6.08823	-5.27409	-6.90237	7.76182e-27	9.95998	3.73425	Pdlim5	protein_coding	PDZ and LIM domain 5 [Source:MGI Symbol;Acc:MGI:1927489]	0.975355	2	3.72274e-22	4.46096e-18
ENSMUSG00000028278	1.95904e-10	-3.82528	-2.80837	-4.84219	6.23015e-09	8.80827	4.86538	Rragd	protein_coding	Ras-related GTP binding D [Source:MGI Symbol;Acc:MGI:1098604]	0.827296	2	2.93584e-11	3.4273e-07
ENSMUSG00000028289	7.64012e-14	-4.33767	-3.34052	-5.33482	4.09273e-12	5.79107	1.37294	Epha7	protein_coding	Eph receptor A7 [Source:MGI Symbol;Acc:MGI:95276]	0.836445	2	1.16627e-13	1.37632e-09
ENSMUSG00000028322	1.68532e-10	2.92049	3.81429	2.02669	5.41685e-09	2.4959	5.48525	Exosc3	protein_coding	exosome component 3 [Source:MGI Symbol;Acc:MGI:1913612]	0.734949	1	4.12614e-06	0.0446779
ENSMUSG00000028328	1.05771e-24	-5.69712	-4.79723	-6.59701	1.74638e-22	9.68087	3.87425	Tmod1	protein_coding	tropomodulin 1 [Source:MGI Symbol;Acc:MGI:98775]	0.9396	2	3.00757e-19	3.59404e-15
ENSMUSG00000028420	1.23744e-10	-3.44809	-2.44945	-4.44674	4.08626e-09	4.82629	1.33824	Tmem38b	protein_coding	transmembrane protein 38B [Source:MGI Symbol;Acc:MGI:1098718]	0.779313	2	1.75869e-09	2.02829e-05
ENSMUSG00000028461	1.12333e-08	-3.0863	-2.12882	-4.04378	2.69175e-07	4.84877	1.71659	Ccdc107	protein_coding	coiled-coil domain containing 107 [Source:MGI Symbol;Acc:MGI:1913423]	0.776699	2	2.48689e-09	2.86117e-05
ENSMUSG00000028464	8.14183e-09	-3.09087	-2.12882	-4.05293	2.00682e-07	6.65741	3.47437	Tpm2	protein_coding	tropomyosin 2, beta [Source:MGI Symbol;Acc:MGI:98810]	0.767644	2	4.12317e-08	0.000469052
ENSMUSG00000028517	1.26459e-13	3.84685	4.61265	3.08105	6.59833e-12	0.478695	4.36664	Plpp3	protein_coding	phospholipid phosphatase 3 [Source:MGI Symbol;Acc:MGI:1915166]	0.695165	3	2.22361e-05	0.233946
ENSMUSG00000028518	1.56421e-17	-4.43612	-3.51758	-5.35465	1.27388e-15	5.28465	0.77177	Prkaa2	protein_coding	protein kinase, AMP-activated, alpha 2 catalytic subunit [Source:MGI Symbol;Acc:MGI:1336173]	0.872666	2	4.50249e-17	5.36426e-13
ENSMUSG00000028773	4.40351e-26	-5.90014	-5.09165	-6.70862	9.15094e-24	6.90797	0.901116	Fabp3	protein_coding	fatty acid binding protein 3, muscle and heart [Source:MGI Symbol;Acc:MGI:95476]	0.934653	2	4.80906e-22	5.76222e-18
ENSMUSG00000028949	2.2212e-12	-3.75166	-2.84175	-4.66158	9.63024e-11	5.751	1.94583	Smarcd3	protein_coding	SWI/SNF related, matrix associated, actin dependent regulator of chromatin, subfamily d, member 3 [Source:MGI Symbol;Acc:MGI:1914243]	0.830284	2	7.0313e-12	8.22873e-08
ENSMUSG00000028977	9.01767e-25	-4.89955	-4.15384	-5.64526	1.53084e-22	5.49374	0.501597	Casz1	protein_coding	castor zinc finger 1 [Source:MGI Symbol;Acc:MGI:1196251]	0.931105	2	1.17607e-22	1.4107e-18
ENSMUSG00000029167	5.71068e-25	-5.13513	-4.25234	-6.01792	1.02733e-22	5.41016	0.183111	Ppargc1a	protein_coding	peroxisome proliferative activated receptor, gamma, coactivator 1 alpha [Source:MGI Symbol;Acc:MGI:1342774]	0.900392	2	2.34254e-22	2.808e-18
ENSMUSG00000029432	1.58193e-17	-3.02997	-2.39069	-3.66925	1.27966e-15	10.2571	7.13381	Gbas	protein_coding	glioblastoma amplified sequence [Source:MGI Symbol;Acc:MGI:1278343]	0.940627	2	3.81791e-19	4.56202e-15
ENSMUSG00000029467	2.66621e-18	-3.49476	-2.81125	-4.17827	2.27914e-16	10.0079	6.43642	Atp2a2	protein_coding	ATPase, Ca++ transporting, cardiac muscle, slow twitch 2 [Source:MGI Symbol;Acc:MGI:88110]	0.915422	2	3.44728e-17	4.10743e-13
ENSMUSG00000029484	1.21327e-07	-3.14005	-2.02443	-4.25567	2.27426e-06	4.3767	1.18136	Anxa3	protein_coding	annexin A3 [Source:MGI Symbol;Acc:MGI:1201378]	0.739731	2	1.54485e-08	0.000176607
ENSMUSG00000029552	4.09629e-12	4.21294	5.16484	3.26103	1.7203e-10	1.24561	5.52245	Tes	protein_coding	testis derived transcript [Source:MGI Symbol;Acc:MGI:105081]	0.723434	1	7.34883e-06	0.0789044
ENSMUSG00000029651	1.55245e-08	-3.33896	-2.19815	-4.47977	3.5984e-07	4.32751	0.931238	Mtus2	protein_coding	microtubule associated tumor suppressor candidate 2 [Source:MGI Symbol;Acc:MGI:1915388]	0.744586	2	3.55162e-09	4.08046e-05
ENSMUSG00000029752	1.36465e-09	3.93646	5.06105	2.81187	3.85201e-08	3.1609	7.16069	Asns	protein_coding	asparagine synthetase [Source:MGI Symbol;Acc:MGI:1350929]	0.680505	1	0.000390401	1
ENSMUSG00000029838	2.32433e-09	3.7624	4.91788	2.60692	6.28765e-08	2.09793	5.88541	Ptn	protein_coding	pleiotrophin [Source:MGI Symbol;Acc:MGI:97804]	0.968361	3	1.63383e-23	1.9624e-19
ENSMUSG00000030060	8.92277e-07	3.04961	4.08685	2.01237	1.31635e-05	2.39236	5.48298	Hmces	protein_coding	5-hydroxymethylcytosine (hmC) binding, ES cell specific [Source:MGI Symbol;Acc:MGI:1914053]	0.738485	1	2.33216e-06	0.0254672
ENSMUSG00000030256	3.43133e-09	-3.57033	-2.39138	-4.74928	8.93256e-08	4.4172	0.777837	Bhlhe41	protein_coding	basic helix-loop-helix family, member e41 [Source:MGI Symbol;Acc:MGI:1930704]	0.748786	2	3.03145e-10	3.5186e-06
ENSMUSG00000030401	1.6836e-11	-3.22607	-2.24614	-4.206	6.42165e-10	3.82751	0.528573	Rtn2	protein_coding	reticulon 2 (Z-band associated protein) [Source:MGI Symbol;Acc:MGI:107612]	0.774925	2	1.55963e-12	1.83178e-08
ENSMUSG00000030470	4.85504e-40	-8.81056	-8.10807	-9.51305	4.87648e-37	9.59903	0.587931	Csrp3	protein_coding	cysteine and glycine-rich protein 3 [Source:MGI Symbol;Acc:MGI:1330824]	0.993465	2	2.51657e-28	3.03247e-24
ENSMUSG00000030605	1.70924e-07	-3.08082	-2.00364	-4.15799	3.08406e-06	7.68746	4.5616	Mfge8	protein_coding	milk fat globule-EGF factor 8 protein [Source:MGI Symbol;Acc:MGI:102768]	0.755788	2	1.91823e-07	0.00215455
ENSMUSG00000030672	1.81355e-13	-3.61099	-2.59547	-4.6265	9.22307e-12	3.98162	0.302217	Mylpf	protein_coding	myosin light chain, phosphorylatable, fast skeletal muscle [Source:MGI Symbol;Acc:MGI:97273]	0.773152	2	5.76555e-13	6.78374e-09
ENSMUSG00000030782	2.30571e-18	-5.36305	-4.44832	-6.27778	2.01382e-16	7.82747	2.3532	Tgfb1i1	protein_coding	transforming growth factor beta 1 induced transcript 1 [Source:MGI Symbol;Acc:MGI:102784]	0.900112	2	4.76198e-17	5.67294e-13
ENSMUSG00000030785	4.76969e-24	-5.60189	-4.64845	-6.55534	7.27709e-22	5.91671	0.184649	Cox6a2	protein_coding	cytochrome c oxidase subunit VIa polypeptide 2 [Source:MGI Symbol;Acc:MGI:104649]	0.885456	2	1.70881e-22	2.04886e-18
ENSMUSG00000031216	2.24137e-07	3.15977	4.14775	2.1718	3.89268e-06	1.10258	4.28753	Stard8	protein_coding	START domain containing 8 [Source:MGI Symbol;Acc:MGI:2448556]	0.857778	1	1.43296e-13	1.69032e-09
ENSMUSG00000031312	1.79561e-15	-4.16727	-3.0734	-5.26113	1.18927e-13	4.72452	0.493745	Itgb1bp2	protein_coding	integrin beta 1 binding protein 2 [Source:MGI Symbol;Acc:MGI:1353420]	0.783047	2	2.36398e-12	2.77366e-08
ENSMUSG00000031458	1.14129e-10	-3.35754	-2.51476	-4.20032	3.77912e-09	6.89781	3.45201	Coprs	protein_coding	coordinator of PRMT5, differentiation stimulator [Source:MGI Symbol;Acc:MGI:1913673]	0.810773	2	2.11077e-10	2.45272e-06
ENSMUSG00000031562	1.29575e-07	3.3438	4.42595	2.26165	2.40272e-06	2.82795	6.22344	Dctd	protein_coding	dCMP deaminase [Source:MGI Symbol;Acc:MGI:2444529]	0.64744	3	0.00198786	1
ENSMUSG00000031608	1.39666e-09	3.26817	4.1798	2.35655	3.93317e-08	1.4555	4.77288	Galnt7	protein_coding	UDP-N-acetyl-alpha-D-galactosamine: polypeptide N-acetylgalactosaminyltransferase 7 [Source:MGI Symbol;Acc:MGI:1349449]	0.709207	3	8.77765e-06	0.0940262
ENSMUSG00000031616	4.46679e-08	-3.38694	-2.28404	-4.48983	9.31457e-07	5.28519	1.8438	Ednra	protein_coding	endothelin receptor type A [Source:MGI Symbol;Acc:MGI:105923]	0.763723	2	1.0133e-08	0.000116033
ENSMUSG00000031626	3.52791e-37	-7.58783	-6.84512	-8.33054	2.238e-34	8.76011	1.03767	Sorbs2	protein_coding	sorbin and SH3 domain containing 2 [Source:MGI Symbol;Acc:MGI:1924574]	0.976288	2	2.79708e-24	3.36349e-20
ENSMUSG00000031673	1.5321e-18	4.8538	5.76387	3.94374	1.39897e-16	1.63612	6.56733	Cdh11	protein_coding	cadherin 11 [Source:MGI Symbol;Acc:MGI:99217]	0.686869	1	0.000255747	1
ENSMUSG00000031698	1.48471e-23	-6.45872	-5.49373	-7.4237	2.13038e-21	7.86163	1.28931	Mylk3	protein_coding	myosin light chain kinase 3 [Source:MGI Symbol;Acc:MGI:2443063]	0.920836	2	2.64306e-19	3.15899e-15
ENSMUSG00000031740	2.69404e-15	4.23442	5.01887	3.44997	1.73643e-13	0.26487	4.56555	Mmp2	protein_coding	matrix metallopeptidase 2 [Source:MGI Symbol;Acc:MGI:97009]	0.723782	3	6.30232e-07	0.00699683
ENSMUSG00000031880	1.63694e-24	-5.13982	-4.13094	-6.1487	2.63068e-22	5.45008	0.15001	Rrad	protein_coding	Ras-related associated with diabetes [Source:MGI Symbol;Acc:MGI:1930943]	0.883588	2	5.95914e-23	7.15096e-19
ENSMUSG00000031965	1.363e-12	-4.72739	-3.65827	-5.7965	6.10715e-11	8.12896	3.3017	Tbx20	protein_coding	T-box 20 [Source:MGI Symbol;Acc:MGI:1888496]	0.818521	2	5.10212e-11	5.9501e-07
ENSMUSG00000031972	4.16371e-20	-7.18976	-5.80774	-8.57178	4.40221e-18	8.31724	1.06179	Acta1	protein_coding	actin, alpha 1, skeletal muscle [Source:MGI Symbol;Acc:MGI:87902]	0.857916	2	5.48552e-14	6.48224e-10
ENSMUSG00000032010	4.23607e-18	-4.25907	-3.40375	-5.11439	3.57045e-16	5.16008	0.816871	Usp2	protein_coding	ubiquitin specific peptidase 2 [Source:MGI Symbol;Acc:MGI:1858178]	0.880134	2	7.85612e-18	9.3692e-14
ENSMUSG00000032024	9.38406e-09	2.95486	3.75737	2.15235	2.28618e-07	0.831664	3.81678	Clmp	protein_coding	CXADR-like membrane protein [Source:MGI Symbol;Acc:MGI:1918816]	0.811589	3	1.39133e-11	1.6266e-07
ENSMUSG00000032035	2.487e-17	5.4837	6.399	4.5684	1.94648e-15	0.136756	5.67041	Ets1	protein_coding	E26 avian leukemia oncogene 1, 5' domain [Source:MGI Symbol;Acc:MGI:95455]	0.754141	1	1.02667e-07	0.00115891
ENSMUSG00000032058	1.08141e-07	3.33304	4.45019	2.21589	2.04941e-06	4.30474	7.69362	Ppp2r1b	protein_coding	protein phosphatase 2, regulatory subunit A, beta [Source:MGI Symbol;Acc:MGI:1920949]	0.632727	1	0.00953622	1
ENSMUSG00000032060	4.78221e-31	-7.76686	-6.79421	-8.73952	1.47795e-28	9.58805	1.68116	Cryab	protein_coding	crystallin, alpha B [Source:MGI Symbol;Acc:MGI:88516]	0.951923	2	1.59682e-22	1.91475e-18
ENSMUSG00000032085	6.09206e-22	-6.43893	-5.43838	-7.43949	7.49261e-20	10.327	3.72606	Tagln	protein_coding	transgelin [Source:MGI Symbol;Acc:MGI:106012]	0.951456	2	2.43343e-20	2.91087e-16
ENSMUSG00000032228	4.12834e-08	3.2261	4.2558	2.1964	8.68392e-07	4.09137	7.36762	Tcf12	protein_coding	transcription factor 12 [Source:MGI Symbol;Acc:MGI:101877]	0.820832	3	2.46453e-11	2.87759e-07
ENSMUSG00000032267	3.24154e-08	-3.41622	-2.34906	-4.48338	7.00185e-07	6.27778	2.81118	Usp28	protein_coding	ubiquitin specific peptidase 28 [Source:MGI Symbol;Acc:MGI:2442293]	0.774739	2	1.61408e-08	0.000184457
ENSMUSG00000032291	6.5912e-14	4.52271	5.52837	3.51705	3.56489e-12	2.33551	6.93474	Crabp1	protein_coding	cellular retinoic acid binding protein I [Source:MGI Symbol;Acc:MGI:88490]	0.859136	3	5.95815e-14	7.03836e-10
ENSMUSG00000032366	5.3359e-33	-4.39355	-3.80342	-4.98369	1.89158e-30	13.4668	8.99559	Tpm1	protein_coding	tropomyosin 1, alpha [Source:MGI Symbol;Acc:MGI:98809]	0.989171	2	3.17031e-23	3.80596e-19
ENSMUSG00000032394	2.32663e-09	3.55088	4.58053	2.52123	6.28765e-08	2.1471	5.74895	Igdcc3	protein_coding	immunoglobulin superfamily, DCC subclass, member 3 [Source:MGI Symbol;Acc:MGI:1202390]	0.89193	3	2.17157e-16	2.58308e-12
ENSMUSG00000032477	2.8989e-09	3.29489	4.22188	2.3679	7.61231e-08	2.12299	5.46274	Cdc25a	protein_coding	cell division cycle 25A [Source:MGI Symbol;Acc:MGI:103198]	0.70032	3	2.71143e-05	0.283832
ENSMUSG00000032532	4.27832e-13	-3.42343	-2.34665	-4.50021	2.02222e-11	3.61669	0.0617453	Cck	protein_coding	cholecystokinin [Source:MGI Symbol;Acc:MGI:88297]	0.736557	2	1.64306e-13	1.93767e-09
ENSMUSG00000032609	5.50849e-16	-3.57653	-2.54205	-4.61101	3.79393e-14	4.29563	0.634027	Klhdc8b	protein_coding	kelch domain containing 8B [Source:MGI Symbol;Acc:MGI:1925517]	0.828603	2	1.44533e-15	1.71691e-11
ENSMUSG00000032648	2.53154e-18	-3.82999	-2.90503	-4.75494	2.17948e-16	4.13672	0.222253	Pygm	protein_coding	muscle glycogen phosphorylase [Source:MGI Symbol;Acc:MGI:97830]	0.844847	2	1.40391e-18	1.67612e-14
ENSMUSG00000032679	2.59682e-11	-3.63436	-2.59298	-4.67573	9.51351e-10	4.41832	0.716475	Cd59a	protein_coding	CD59a antigen [Source:MGI Symbol;Acc:MGI:109177]	0.788462	2	1.77875e-12	2.08861e-08
ENSMUSG00000032724	3.91725e-09	-3.05151	-2.07694	-4.02608	1.01537e-07	4.08566	0.992558	Abtb2	protein_coding	ankyrin repeat and BTB (POZ) domain containing 2 [Source:MGI Symbol;Acc:MGI:2139365]	0.762323	2	3.38991e-09	3.89568e-05
ENSMUSG00000032845	8.36384e-21	-4.94585	-3.9459	-5.94579	9.51032e-19	5.31638	0.275048	Alpk2	protein_coding	alpha-kinase 2 [Source:MGI Symbol;Acc:MGI:2449492]	0.874253	2	3.30448e-20	3.95216e-16
ENSMUSG00000033032	1.35538e-10	-3.29537	-2.25637	-4.33437	4.4272e-09	4.18776	0.826828	Afap1l1	protein_coding	actin filament associated protein 1-like 1 [Source:MGI Symbol;Acc:MGI:2147199]	0.775952	2	2.7151e-11	3.16987e-07
ENSMUSG00000033060	1.50109e-22	-5.58448	-4.70998	-6.45899	1.94544e-20	6.93257	1.25602	Lmo7	protein_coding	LIM domain only 7 [Source:MGI Symbol;Acc:MGI:1353586]	0.914488	2	4.16845e-19	4.98046e-15
ENSMUSG00000033149	1.17759e-09	3.55589	4.51314	2.59864	3.34753e-08	2.10578	5.69572	Phldb2	protein_coding	pleckstrin homology like domain, family B, member 2 [Source:MGI Symbol;Acc:MGI:2444981]	0.758788	1	3.83186e-07	0.0042775
ENSMUSG00000033257	5.94392e-09	3.1306	4.08511	2.17609	1.48944e-07	3.25772	6.44517	Ttll4	protein_coding	tubulin tyrosine ligase-like family, member 4 [Source:MGI Symbol;Acc:MGI:1914784]	0.664343	1	0.00133498	1
ENSMUSG00000033350	4.83459e-08	3.42258	4.43146	2.41371	9.97797e-07	0.749348	4.24274	Chst2	protein_coding	carbohydrate sulfotransferase 2 [Source:MGI Symbol;Acc:MGI:1891160]	0.658485	1	0.000568443	1
ENSMUSG00000033910	7.10237e-09	-3.59431	-2.34938	-4.83924	1.76142e-07	5.20497	1.5702	Gucy1a3	protein_coding	guanylate cyclase 1, soluble, alpha 3 [Source:MGI Symbol;Acc:MGI:1926562]	0.735717	2	1.83186e-07	0.00205864
ENSMUSG00000034295	1.07483e-15	-3.92968	-3.10888	-4.75049	7.23739e-14	5.12451	1.13346	Fhod3	protein_coding	formin homology 2 domain containing 3 [Source:MGI Symbol;Acc:MGI:1925847]	0.863518	2	4.73668e-15	5.6177e-11
ENSMUSG00000034353	3.83036e-19	-3.93986	-2.99444	-4.88527	3.75344e-17	4.20004	0.132572	Ramp1	protein_coding	receptor (calcitonin) activity modifying protein 1 [Source:MGI Symbol;Acc:MGI:1858418]	0.825896	2	9.02295e-19	1.07761e-14
ENSMUSG00000034898	3.04322e-16	-3.31289	-2.43701	-4.18876	2.14502e-14	3.66446	0.270564	Filip1	protein_coding	filamin A interacting protein 1 [Source:MGI Symbol;Acc:MGI:1917848]	0.820015	2	1.06722e-16	1.27084e-12
ENSMUSG00000035158	3.1473e-10	-3.33577	-2.28058	-4.39096	9.80218e-09	4.10028	0.70902	Mitf	protein_coding	microphthalmia-associated transcription factor [Source:MGI Symbol;Acc:MGI:104554]	0.771751	2	6.99015e-11	8.14422e-07
ENSMUSG00000035458	7.06246e-25	-6.8145	-5.68443	-7.94457	1.23368e-22	7.77483	0.862411	Tnni3	protein_coding	troponin I, cardiac 3 [Source:MGI Symbol;Acc:MGI:98783]	0.893017	2	1.10917e-18	1.32434e-14
ENSMUSG00000035683	5.83382e-09	3.2578	4.31136	2.20425	1.47103e-07	3.1143	6.44042	Melk	protein_coding	maternal embryonic leucine zipper kinase [Source:MGI Symbol;Acc:MGI:106924]	0.642222	1	0.00539633	1
ENSMUSG00000035783	1.81406e-35	-10.1715	-9.07655	-11.2665	8.74595e-33	13.5876	3.21515	Acta2	protein_coding	actin, alpha 2, smooth muscle, aorta [Source:MGI Symbol;Acc:MGI:87909]	0.993839	2	4.36417e-24	5.24486e-20
ENSMUSG00000036103	1.09156e-09	3.40042	4.33426	2.46658	3.12523e-08	1.28716	4.72826	Colec12	protein_coding	collectin sub-family member 12 [Source:MGI Symbol;Acc:MGI:2152907]	0.693131	1	0.000125273	1
ENSMUSG00000036242	6.7033e-13	-4.858	-3.67799	-6.03801	3.13159e-11	10.1406	5.19969	3632451O06Rik	protein_coding	RIKEN cDNA 3632451O06 gene [Source:MGI Symbol;Acc:MGI:1914669]	0.862211	2	1.71072e-13	2.01728e-09
ENSMUSG00000036564	7.58341e-18	-4.39659	-3.35552	-5.43765	6.30365e-16	4.69437	0.217737	Ndrg4	protein_coding	N-myc downstream regulated gene 4 [Source:MGI Symbol;Acc:MGI:2384590]	0.836165	2	1.74417e-17	2.07922e-13
ENSMUSG00000036768	3.44414e-13	3.66901	4.60019	2.73783	1.64731e-11	3.68958	7.45618	Kif15	protein_coding	kinesin family member 15 [Source:MGI Symbol;Acc:MGI:1098258]	0.723516	3	3.29358e-06	0.0357814
ENSMUSG00000036880	5.06477e-08	-3.13281	-2.1841	-4.08151	1.03643e-06	7.53092	4.32242	Acaa2	protein_coding	acetyl-Coenzyme A acyltransferase 2 (mitochondrial 3-oxoacyl-Coenzyme A thiolase) [Source:MGI Symbol;Acc:MGI:1098623]	0.773152	2	2.51925e-08	0.00028732
ENSMUSG00000037012	4.10196e-18	-4.93902	-3.97185	-5.9062	3.48176e-16	6.05184	1.02255	Hk1	protein_coding	hexokinase 1 [Source:MGI Symbol;Acc:MGI:96103]	0.886949	2	1.09745e-17	1.30859e-13
ENSMUSG00000037275	2.37161e-09	3.63904	4.66738	2.6107	6.33814e-08	2.89526	6.57861	Gemin5	protein_coding	gem (nuclear organelle) associated protein 5 [Source:MGI Symbol;Acc:MGI:2449311]	0.704646	1	6.17839e-05	0.633223
ENSMUSG00000037664	8.6766e-13	-3.25414	-2.46443	-4.04386	3.94638e-11	10.574	7.24658	Cdkn1c	protein_coding	cyclin-dependent kinase inhibitor 1C (P57) [Source:MGI Symbol;Acc:MGI:104564]	0.847647	2	1.73096e-12	2.03267e-08
ENSMUSG00000037892	1.15536e-18	5.13304	5.9269	4.33918	1.0712e-16	0.609923	5.8099	Pcdh18	protein_coding	protocadherin 18 [Source:MGI Symbol;Acc:MGI:1920423]	0.73578	3	4.37715e-07	0.00487833
ENSMUSG00000037996	4.84368e-14	-3.19589	-2.21775	-4.17403	2.69036e-12	3.38937	0.093034	Slc24a2	protein_coding	solute carrier family 24 (sodium/potassium/calcium exchanger), member 2 [Source:MGI Symbol;Acc:MGI:1923626]	0.761949	2	1.28111e-14	1.51697e-10
ENSMUSG00000038086	3.76348e-33	-7.87463	-6.96091	-8.78834	1.37458e-30	8.60719	0.591254	Hspb2	protein_coding	heat shock protein 2 [Source:MGI Symbol;Acc:MGI:1916503]	0.951456	2	6.9187e-25	8.32527e-21
ENSMUSG00000038132	1.7114e-27	-6.41269	-5.5747	-7.25068	3.81991e-25	9.27795	2.71942	Rbm24	protein_coding	RNA binding motif protein 24 [Source:MGI Symbol;Acc:MGI:3610364]	0.962285	2	2.29716e-21	2.75062e-17
ENSMUSG00000038156	1.70639e-14	-5.18508	-4.08753	-6.28263	1.00327e-12	7.88075	2.60713	Spon1	protein_coding	spondin 1, (f-spondin) extracellular matrix protein [Source:MGI Symbol;Acc:MGI:2385287]	0.871266	2	1.37725e-14	1.63053e-10
ENSMUSG00000038235	9.4992e-19	-5.34505	-4.3542	-6.3359	8.8755e-17	6.72401	1.29725	F11r	protein_coding	F11 receptor [Source:MGI Symbol;Acc:MGI:1321398]	0.879201	2	2.12169e-16	2.52396e-12
ENSMUSG00000038239	5.96682e-26	-5.72594	-4.8714	-6.58048	1.21895e-23	6.24921	0.410103	Hrc	protein_coding	histidine rich calcium binding protein [Source:MGI Symbol;Acc:MGI:96226]	0.930732	2	8.27939e-24	9.94852e-20
ENSMUSG00000038244	2.81522e-25	-5.18966	-4.31638	-6.06293	5.22028e-23	5.52935	0.238679	Mical2	protein_coding	microtubule associated monooxygenase, calponin and LIM domain containing 2 [Source:MGI Symbol;Acc:MGI:2444947]	0.916449	2	1.61614e-23	1.94131e-19
ENSMUSG00000038252	3.4244e-09	3.03237	3.95692	2.10782	8.93256e-08	3.78206	6.8779	Ncapd2	protein_coding	non-SMC condensin I complex, subunit D2 [Source:MGI Symbol;Acc:MGI:1915548]	0.765553	3	3.27412e-08	0.00037289
ENSMUSG00000038375	2.71647e-10	-3.30967	-2.33657	-4.28276	8.52647e-09	4.84226	1.47509	Trp53inp2	protein_coding	transformation related protein 53 inducible nuclear protein 2 [Source:MGI Symbol;Acc:MGI:1915978]	0.79481	2	1.69952e-10	1.97604e-06
ENSMUSG00000038663	4.27659e-22	-4.95315	-3.95115	-5.95515	5.36934e-20	5.20515	0.150258	Fsd2	protein_coding	fibronectin type III and SPRY domain containing 2 [Source:MGI Symbol;Acc:MGI:2444310]	0.873786	2	3.01274e-21	3.60715e-17
ENSMUSG00000038668	8.08436e-12	4.18541	5.16505	3.20577	3.28084e-10	1.26843	5.49592	Lpar1	protein_coding	lysophosphatidic acid receptor 1 [Source:MGI Symbol;Acc:MGI:108429]	0.865624	3	2.76394e-15	3.28052e-11
ENSMUSG00000038729	2.69094e-12	-3.59969	-2.73412	-4.46526	1.15835e-10	7.92707	4.24723	Akap2	protein_coding	A kinase (PRKA) anchor protein 2 [Source:MGI Symbol;Acc:MGI:1306795]	0.838312	2	6.00555e-12	7.0331e-08
ENSMUSG00000038763	2.02939e-19	-5.53893	-4.58604	-6.49183	2.05548e-17	10.1329	4.43548	Alpk3	protein_coding	alpha-kinase 3 [Source:MGI Symbol;Acc:MGI:2151224]	0.930172	2	1.56638e-18	1.86963e-14
ENSMUSG00000039103	2.36875e-33	-6.74494	-5.91422	-7.57566	9.20987e-31	10.8786	3.99421	Nexn	protein_coding	nexilin [Source:MGI Symbol;Acc:MGI:1916060]	0.987117	2	4.00454e-23	4.80665e-19
ENSMUSG00000039126	4.54088e-15	-5.06175	-3.82318	-6.30031	2.88059e-13	6.05356	0.892661	Prune2	protein_coding	prune homolog 2 [Source:MGI Symbol;Acc:MGI:1925004]	0.840739	2	8.92938e-16	1.06152e-11
ENSMUSG00000039356	3.60592e-11	2.9679	3.79693	2.13887	1.28586e-09	4.52688	7.58676	Exosc2	protein_coding	exosome component 2 [Source:MGI Symbol;Acc:MGI:2385133]	0.693032	3	5.96971e-05	0.612373
ENSMUSG00000039376	2.12976e-34	-6.85737	-6.10624	-7.6085	9.5074e-32	7.68988	0.722421	Synpo2l	protein_coding	synaptopodin 2-like [Source:MGI Symbol;Acc:MGI:1916010]	0.960045	2	2.78383e-23	3.34226e-19
ENSMUSG00000039405	1.67347e-13	-4.62675	-3.46694	-5.78657	8.6198e-12	5.58383	0.88082	Prss23	protein_coding	protease, serine 23 [Source:MGI Symbol;Acc:MGI:1923703]	0.818708	2	9.82546e-14	1.1599e-09
ENSMUSG00000039748	1.59071e-10	3.56583	4.55623	2.57544	5.14016e-09	2.87159	6.50376	Exo1	protein_coding	exonuclease 1 [Source:MGI Symbol;Acc:MGI:1349427]	0.675435	3	0.000254767	1
ENSMUSG00000039770	1.51365e-20	-5.44783	-4.5083	-6.38737	1.67376e-18	8.00272	2.46317	Ypel5	protein_coding	yippee-like 5 (Drosophila) [Source:MGI Symbol;Acc:MGI:1916937]	0.897965	2	1.30309e-16	1.55107e-12
ENSMUSG00000039782	6.50664e-17	-4.01319	-3.16079	-4.86558	4.87109e-15	4.79619	0.729861	Cpeb2	protein_coding	cytoplasmic polyadenylation element binding protein 2 [Source:MGI Symbol;Acc:MGI:2442640]	0.854369	2	5.45317e-15	6.46582e-11
ENSMUSG00000039891	6.20164e-14	-3.29617	-2.33612	-4.25623	3.41317e-12	3.5596	0.185433	Txlnb	protein_coding	taxilin beta [Source:MGI Symbol;Acc:MGI:2671945]	0.780993	2	1.3009e-14	1.54026e-10
ENSMUSG00000039952	1.1117e-10	-3.2799	-2.42849	-4.13132	3.69127e-09	7.31837	3.93172	Dag1	protein_coding	dystroglycan 1 [Source:MGI Symbol;Acc:MGI:101864]	0.803958	2	6.24476e-10	7.23206e-06
ENSMUSG00000039994	1.09006e-07	3.10687	4.16849	2.04524	2.06153e-06	2.7868	5.94605	Timeless	protein_coding	timeless circadian clock 1 [Source:MGI Symbol;Acc:MGI:1321393]	0.692321	3	5.90118e-05	0.605697
ENSMUSG00000040204	3.27764e-17	2.86791	3.43174	2.30408	2.5324e-15	6.93799	9.80731	Pclaf	protein_coding	PCNA clamp associated factor [Source:MGI Symbol;Acc:MGI:1915276]	0.730892	3	1.57538e-06	0.017304
ENSMUSG00000040430	1.17926e-08	3.01631	4.01936	2.01325	2.82015e-07	2.62271	5.69742	Pitpnc1	protein_coding	phosphatidylinositol transfer protein, cytoplasmic 1 [Source:MGI Symbol;Acc:MGI:1919045]	0.740313	3	5.12234e-07	0.00569674
ENSMUSG00000040653	1.65145e-25	-5.66767	-4.80059	-6.53474	3.15951e-23	6.20841	0.438663	Ppp1r14c	protein_coding	protein phosphatase 1, regulatory (inhibitor) subunit 14c [Source:MGI Symbol;Acc:MGI:1923392]	0.924664	2	1.41655e-22	1.69887e-18
ENSMUSG00000040666	1.28767e-46	-8.71072	-8.05052	-9.37092	1.94004e-43	10.1664	1.27827	Sh3bgr	protein_coding	SH3-binding domain glutamic acid-rich protein [Source:MGI Symbol;Acc:MGI:1354740]	0.996639	2	7.59418e-26	9.14339e-22
ENSMUSG00000040694	1.57253e-26	-6.20123	-5.27042	-7.13203	3.38459e-24	6.65958	0.314455	Apobec2	protein_coding	apolipoprotein B mRNA editing enzyme, catalytic polypeptide 2 [Source:MGI Symbol;Acc:MGI:1343178]	0.927745	2	5.34055e-25	6.42682e-21
ENSMUSG00000040723	2.65869e-32	-6.60335	-5.85722	-7.34947	8.66088e-30	7.51699	0.799934	Rcsd1	protein_coding	RCSD domain containing 1 [Source:MGI Symbol;Acc:MGI:2676394]	0.96714	2	2.03737e-23	2.44668e-19
ENSMUSG00000040752	1.90835e-38	-9.43161	-8.50593	-10.3573	1.43758e-35	11.7712	2.16325	Myh6	protein_coding	myosin, heavy polypeptide 6, cardiac muscle, alpha [Source:MGI Symbol;Acc:MGI:97255]	0.973301	2	2.00037e-22	2.39825e-18
ENSMUSG00000041329	1.37429e-14	-4.04832	-3.03877	-5.05786	8.28217e-13	4.74154	0.606167	Atp1b2	protein_coding	ATPase, Na+/K+ transporting, beta 2 polypeptide [Source:MGI Symbol;Acc:MGI:88109]	0.819828	2	3.57162e-15	4.23702e-11
ENSMUSG00000041476	2.11277e-28	-7.00142	-5.9969	-8.00593	5.19699e-26	7.47639	0.349058	Smpx	protein_coding	small muscle protein, X-linked [Source:MGI Symbol;Acc:MGI:1913356]	0.919436	2	2.46782e-23	2.96336e-19
ENSMUSG00000041477	9.75427e-11	-3.86913	-2.78129	-4.95697	3.30248e-09	5.27572	1.34457	Dcp1b	protein_coding	decapping mRNA 1B [Source:MGI Symbol;Acc:MGI:2442404]	0.787715	2	6.28662e-11	7.32705e-07
ENSMUSG00000041506	6.64607e-10	3.25208	4.16607	2.3381	1.9828e-08	1.83316	5.13764	Rrp9	protein_coding	RRP9, small subunit (SSU) processome component, homolog (yeast) [Source:MGI Symbol;Acc:MGI:2384313]	0.754141	1	5.30802e-07	0.00590252
ENSMUSG00000041616	6.59562e-14	-4.09741	-2.81059	-5.38423	3.56489e-12	4.29164	0.0531212	Nppa	protein_coding	natriuretic peptide type A [Source:MGI Symbol;Acc:MGI:97367]	0.746826	2	3.53008e-14	4.17362e-10
ENSMUSG00000041731	1.73818e-13	-3.1925	-2.3661	-4.0189	8.87724e-12	3.74283	0.499079	Pgm5	protein_coding	phosphoglucomutase 5 [Source:MGI Symbol;Acc:MGI:1925668]	0.808626	2	1.79295e-13	2.11407e-09
ENSMUSG00000041957	2.75183e-14	-4.37486	-3.41788	-5.33184	1.56452e-12	6.36893	1.927	Pkp2	protein_coding	plakophilin 2 [Source:MGI Symbol;Acc:MGI:1914701]	0.854089	2	1.11206e-13	1.31246e-09
ENSMUSG00000042155	9.10196e-17	-5.07035	-4.12264	-6.01806	6.64884e-15	8.6148	3.40472	Klhl23	protein_coding	kelch-like 23 [Source:MGI Symbol;Acc:MGI:2683536]	0.874533	2	1.69886e-14	2.01026e-10
ENSMUSG00000042489	4.22297e-08	2.99448	3.94187	2.04708	8.85208e-07	3.21442	6.2406	Clspn	protein_coding	claspin [Source:MGI Symbol;Acc:MGI:2445153]	0.669392	3	0.000421233	1
ENSMUSG00000042613	2.68769e-13	-3.97025	-2.99991	-4.94059	1.30624e-11	5.50444	1.46319	Pbxip1	protein_coding	pre B cell leukemia transcription factor interacting protein 1 [Source:MGI Symbol;Acc:MGI:2441670]	0.838125	2	4.15554e-13	4.89398e-09
ENSMUSG00000042812	1.34186e-10	3.70443	4.56641	2.84244	4.40692e-09	0.59733	4.34637	Foxf1	protein_coding	forkhead box F1 [Source:MGI Symbol;Acc:MGI:1347470]	0.889495	1	3.42073e-16	4.06793e-12
ENSMUSG00000042821	2.19967e-13	3.3186	4.01544	2.62177	1.09556e-11	0.197718	3.56522	Snai1	protein_coding	snail family zinc finger 1 [Source:MGI Symbol;Acc:MGI:98330]	0.686667	1	7.59233e-05	0.772824
ENSMUSG00000042895	2.14959e-15	-3.48786	-2.46463	-4.51109	1.40049e-13	3.62997	0.0505655	Abra	protein_coding	actin-binding Rho activating protein [Source:MGI Symbol;Acc:MGI:2444891]	0.773058	2	2.16998e-15	2.57642e-11
ENSMUSG00000043154	7.90951e-10	-3.77761	-2.7085	-4.84672	2.30831e-08	6.41081	2.56856	Ppp2r3a	protein_coding	protein phosphatase 2, regulatory subunit B'', alpha [Source:MGI Symbol;Acc:MGI:2442104]	0.798264	2	8.63226e-10	9.98666e-06
ENSMUSG00000043639	1.26116e-13	-2.96153	-2.09344	-3.82962	6.59833e-12	3.41127	0.392979	Rbm20	protein_coding	RNA binding motif protein 20 [Source:MGI Symbol;Acc:MGI:1920963]	0.809093	2	2.85135e-14	3.372e-10
ENSMUSG00000044033	3.631e-30	-7.55747	-6.63464	-8.48029	1.01778e-27	10.7196	2.99525	Ccdc141	protein_coding	coiled-coil domain containing 141 [Source:MGI Symbol;Acc:MGI:1919735]	0.98301	2	3.54156e-23	4.25129e-19
ENSMUSG00000044080	2.36333e-09	-3.06087	-2.07295	-4.04879	6.33006e-08	4.00868	0.898703	S100a1	protein_coding	S100 calcium binding protein A1 [Source:MGI Symbol;Acc:MGI:1338917]	0.75168	2	1.92113e-09	2.2141e-05
ENSMUSG00000044086	7.07607e-14	-2.95426	-2.08367	-3.82484	3.80749e-12	3.12849	0.104194	Lmod3	protein_coding	leiomodin 3 (fetal) [Source:MGI Symbol;Acc:MGI:2444169]	0.758215	2	1.28928e-13	1.52109e-09
ENSMUSG00000044938	4.20379e-24	-6.97574	-5.86771	-8.08376	6.58029e-22	7.78207	0.691768	Klhl31	protein_coding	kelch-like 31 [Source:MGI Symbol;Acc:MGI:3045305]	0.918036	2	2.12808e-21	2.54838e-17
ENSMUSG00000045038	5.29031e-09	-2.91961	-2.0381	-3.80112	1.3424e-07	4.58645	1.62069	Prkce	protein_coding	protein kinase C, epsilon [Source:MGI Symbol;Acc:MGI:97599]	0.786968	2	1.07367e-09	1.24073e-05
ENSMUSG00000045333	1.30988e-08	2.91913	3.77338	2.06488	3.08961e-07	1.35821	4.31744	Zfp423	protein_coding	zinc finger protein 423 [Source:MGI Symbol;Acc:MGI:1891217]	0.676324	3	0.000176153	1
ENSMUSG00000045636	7.08967e-13	-4.08629	-3.07275	-5.09983	3.27402e-11	5.36275	1.2211	Mtus1	protein_coding	mitochondrial tumor suppressor 1 [Source:MGI Symbol;Acc:MGI:2142572]	0.825243	2	1.8445e-12	2.16563e-08
ENSMUSG00000045659	9.15401e-10	-3.02345	-2.07164	-3.97526	2.64588e-08	3.97725	0.905138	Plekha7	protein_coding	pleckstrin homology domain containing, family A member 7 [Source:MGI Symbol;Acc:MGI:2445094]	0.779126	2	1.58993e-10	1.84908e-06
ENSMUSG00000045763	2.13816e-13	2.84894	3.55055	2.14734	1.06935e-11	2.52838	5.44606	Basp1	protein_coding	brain abundant, membrane attached signal protein 1 [Source:MGI Symbol;Acc:MGI:1917600]	0.826263	1	1.89686e-10	2.2051e-06
ENSMUSG00000046794	1.05567e-14	-3.73364	-2.72986	-4.73743	6.4589e-13	4.10807	0.302883	Ppp1r3b	protein_coding	protein phosphatase 1, regulatory (inhibitor) subunit 3B [Source:MGI Symbol;Acc:MGI:2177268]	0.808813	2	3.33693e-15	3.95893e-11
ENSMUSG00000046876	2.22105e-13	-3.59974	-2.64722	-4.55227	1.10166e-11	4.16111	0.501595	Atxn1	protein_coding	ataxin 1 [Source:MGI Symbol;Acc:MGI:104783]	0.802278	2	2.10556e-13	2.48183e-09
ENSMUSG00000047407	7.03626e-10	2.89144	3.7045	2.07838	2.08887e-08	0.861933	3.80043	Tgif1	protein_coding	TGFB-induced factor homeobox 1 [Source:MGI Symbol;Acc:MGI:1194497]	0.643232	1	0.00351279	1
ENSMUSG00000047710	7.23867e-08	3.00428	3.99787	2.01068	1.43029e-06	2.03693	5.08571	Champ1	protein_coding	chromosome alignment maintaining phosphoprotein 1 [Source:MGI Symbol;Acc:MGI:1196398]	0.676769	3	0.000205154	1
ENSMUSG00000047786	4.06115e-06	3.19657	4.31193	2.08122	5.1417e-05	1.27078	4.50662	Lix1	protein_coding	limb and CNS expressed 1 [Source:MGI Symbol;Acc:MGI:1913893]	0.874511	3	1.32054e-16	1.57171e-12
ENSMUSG00000047832	6.00713e-07	3.17753	4.28253	2.07252	9.3184e-06	3.61138	6.83673	Cdca4	protein_coding	cell division cycle associated 4 [Source:MGI Symbol;Acc:MGI:1919213]	0.680235	3	0.000169975	1
ENSMUSG00000048096	1.4328e-22	-4.55729	-3.73048	-5.38411	1.87713e-20	4.88959	0.232418	Lmod1	protein_coding	leiomodin 1 (smooth muscle) [Source:MGI Symbol;Acc:MGI:2135671]	0.88947	2	5.00685e-22	5.99871e-18
ENSMUSG00000048450	5.59039e-17	5.00741	5.84213	4.1727	4.21131e-15	0.623376	5.68905	Msx1	protein_coding	msh homeobox 1 [Source:MGI Symbol;Acc:MGI:97168]	0.803535	1	9.355e-10	1.082e-05
ENSMUSG00000048490	2.68988e-11	3.52868	4.47166	2.58569	9.82457e-10	1.57978	5.17184	Nrip1	protein_coding	nuclear receptor interacting protein 1 [Source:MGI Symbol;Acc:MGI:1315213]	0.677924	3	0.000165086	1
ENSMUSG00000048915	8.25694e-14	5.03706	6.18685	3.88727	4.38418e-12	3.71487	8.83778	Efna5	protein_coding	ephrin A5 [Source:MGI Symbol;Acc:MGI:107444]	0.847672	3	4.34888e-13	5.12124e-09
ENSMUSG00000049422	2.90527e-23	-4.3891	-3.60871	-5.16949	3.98663e-21	4.79684	0.316492	Chchd10	protein_coding	coiled-coil-helix-coiled-coil-helix domain containing 10 [Source:MGI Symbol;Acc:MGI:2143558]	0.909261	2	1.58912e-22	1.90567e-18
ENSMUSG00000049537	2.42928e-14	-3.48042	-2.47215	-4.48868	1.39429e-12	3.75798	0.186005	Tecrl	protein_coding	trans-2,3-enoyl-CoA reductase-like [Source:MGI Symbol;Acc:MGI:2444966]	0.78314	2	4.24317e-15	5.03282e-11
ENSMUSG00000050244	1.59516e-07	3.10015	4.11175	2.08856	2.89555e-06	2.95185	6.09573	Heatr1	protein_coding	HEAT repeat containing 1 [Source:MGI Symbol;Acc:MGI:2442524]	0.685556	1	0.000278148	1
ENSMUSG00000050315	1.99586e-17	-4.60574	-3.63272	-5.57877	1.59312e-15	6.18068	1.472	Synpo2	protein_coding	synaptopodin 2 [Source:MGI Symbol;Acc:MGI:2153070]	0.8736	2	9.68274e-16	1.1507e-11
ENSMUSG00000050379	8.5361e-08	3.08375	4.00844	2.15906	1.64881e-06	1.25135	4.37617	2006-09-01	protein_coding	septin 6 [Source:MGI Symbol;Acc:MGI:1888939]	0.690404	1	0.000110803	1
ENSMUSG00000050503	3.16197e-17	-4.90474	-3.88482	-5.92466	2.45879e-15	5.93215	0.959173	Fbxl22	protein_coding	F-box and leucine-rich repeat protein 22 [Source:MGI Symbol;Acc:MGI:1921415]	0.856889	2	2.8376e-15	3.36766e-11
ENSMUSG00000050592	4.46957e-14	-3.15459	-2.19349	-4.11568	2.49406e-12	3.38734	0.166241	Fam78a	protein_coding	family with sequence similarity 78, member A [Source:MGI Symbol;Acc:MGI:2443569]	0.787528	2	1.09043e-14	1.29151e-10
ENSMUSG00000050953	1.20027e-27	5.82752	6.71606	4.93898	2.7296e-25	4.02921	9.97843	Gja1	protein_coding	gap junction protein, alpha 1 [Source:MGI Symbol;Acc:MGI:95713]	0.742979	3	4.32574e-07	0.0048219
ENSMUSG00000051331	1.32516e-12	-3.44739	-2.49878	-4.39599	5.95977e-11	4.05629	0.555219	Cacna1c	protein_coding	calcium channel, voltage-dependent, L type, alpha 1C subunit [Source:MGI Symbol;Acc:MGI:103013]	0.801251	2	8.85045e-13	1.04064e-08
ENSMUSG00000051456	6.40315e-19	-4.12186	-3.17581	-5.06792	6.12517e-17	4.3352	0.111361	Hspb3	protein_coding	heat shock protein 3 [Source:MGI Symbol;Acc:MGI:1928479]	0.826923	2	1.52988e-18	1.82622e-14
ENSMUSG00000051747	3.65672e-64	-10.9723	-10.2154	-11.7292	4.40744e-60	14.2534	3.11951	Ttn	protein_coding	titin [Source:MGI Symbol;Acc:MGI:98864]	0.998693	2	3.94166e-24	4.73826e-20
ENSMUSG00000052374	7.53871e-34	-8.32234	-7.33148	-9.3132	3.13324e-31	8.82637	0.352461	Actn2	protein_coding	actinin alpha 2 [Source:MGI Symbol;Acc:MGI:109192]	0.944268	2	1.81839e-25	2.18861e-21
ENSMUSG00000052396	9.25177e-19	5.50779	6.38028	4.6353	8.71184e-17	0.85279	6.44901	Mogat2	protein_coding	monoacylglycerol O-acyltransferase 2 [Source:MGI Symbol;Acc:MGI:2663253]	0.695758	1	8.98405e-05	0.909995
ENSMUSG00000052512	2.16518e-09	-3.2209	-2.28995	-4.15184	5.93112e-08	6.74569	3.47296	Nav2	protein_coding	neuron navigator 2 [Source:MGI Symbol;Acc:MGI:2183691]	0.804238	2	5.61828e-10	6.50934e-06
ENSMUSG00000052727	1.46748e-14	-4.0329	-3.12959	-4.93622	8.79975e-13	12.3877	8.26948	Map1b	protein_coding	microtubule-associated protein 1B [Source:MGI Symbol;Acc:MGI:1306778]	0.922143	2	1.06486e-17	1.26984e-13
ENSMUSG00000052920	6.55685e-14	-4.29794	-3.25989	-5.33599	3.56489e-12	5.25029	0.883113	Prkg1	protein_coding	protein kinase, cGMP-dependent, type I [Source:MGI Symbol;Acc:MGI:108174]	0.82655	2	5.58537e-14	6.59968e-10
ENSMUSG00000052957	3.25735e-09	3.169	4.08146	2.25654	8.51646e-08	2.58467	5.80086	Gas1	protein_coding	growth arrest specific 1 [Source:MGI Symbol;Acc:MGI:95655]	0.738535	3	6.2117e-07	0.00689685
ENSMUSG00000053093	5.82362e-33	-9.1837	-8.14465	-10.2228	2.00549e-30	10.4988	1.16927	Myh7	protein_coding	myosin, heavy polypeptide 7, cardiac muscle, beta [Source:MGI Symbol;Acc:MGI:2155600]	0.961445	2	2.66871e-22	3.19845e-18
ENSMUSG00000053398	2.32455e-07	3.16765	4.28413	2.05117	4.02555e-06	4.51377	7.74284	Phgdh	protein_coding	3-phosphoglycerate dehydrogenase [Source:MGI Symbol;Acc:MGI:1355330]	0.754177	3	1.18597e-07	0.00133742
ENSMUSG00000053702	5.7062e-40	-8.61585	-7.74987	-9.48183	5.29053e-37	11.7202	2.94038	Nebl	protein_coding	nebulette [Source:MGI Symbol;Acc:MGI:1921353]	0.991225	2	1.10399e-23	1.32634e-19
ENSMUSG00000053819	2.09105e-18	-4.75221	-3.89022	-5.6142	1.8532e-16	6.71203	1.88309	Camk2d	protein_coding	calcium/calmodulin-dependent protein kinase II, delta [Source:MGI Symbol;Acc:MGI:1341265]	0.891897	2	3.40243e-16	4.04652e-12
ENSMUSG00000054459	1.2974e-09	-3.20269	-2.07551	-4.32986	3.67943e-08	3.63596	0.37226	Vsnl1	protein_coding	visinin-like 1 [Source:MGI Symbol;Acc:MGI:1349453]	0.718073	2	2.23558e-09	2.57338e-05
ENSMUSG00000054640	2.9364e-43	-8.2497	-7.57505	-8.92435	3.53924e-40	8.58131	0.174481	Slc8a1	protein_coding	solute carrier family 8 (sodium/calcium exchanger), member 1 [Source:MGI Symbol;Acc:MGI:107956]	0.987864	2	5.02073e-29	6.05048e-25
ENSMUSG00000054889	4.08431e-09	-3.54511	-2.51369	-4.57653	1.05414e-07	8.40731	4.79122	Dsp	protein_coding	desmoplakin [Source:MGI Symbol;Acc:MGI:109611]	0.798264	2	1.38747e-09	1.60226e-05
ENSMUSG00000055027	9.66117e-25	-6.18204	-5.35962	-7.00447	1.61731e-22	7.69836	1.37969	Smyd1	protein_coding	SET and MYND domain containing 1 [Source:MGI Symbol;Acc:MGI:104790]	0.936333	2	5.28915e-21	6.33111e-17
ENSMUSG00000055612	7.80786e-10	3.08372	4.00693	2.16051	2.28421e-08	4.75617	7.9097	Cdca7	protein_coding	cell division cycle associated 7 [Source:MGI Symbol;Acc:MGI:1914203]	0.712673	3	9.71435e-06	0.103817
ENSMUSG00000058056	1.06584e-22	-5.29575	-4.43615	-6.15536	1.41171e-20	9.85356	4.43666	Palld	protein_coding	palladin, cytoskeletal associated protein [Source:MGI Symbol;Acc:MGI:1919583]	0.952016	2	4.25234e-20	5.08495e-16
ENSMUSG00000058571	1.91375e-07	2.93696	3.84817	2.02574	3.41774e-06	1.0153	3.98591	Gpc6	protein_coding	glypican 6 [Source:MGI Symbol;Acc:MGI:1346322]	0.751955	3	4.35444e-08	0.000495274
ENSMUSG00000059325	2.15553e-18	-4.1383	-3.27378	-5.00281	1.89639e-16	4.64195	0.436718	Hopx	protein_coding	HOP homeobox [Source:MGI Symbol;Acc:MGI:1916782]	0.852128	2	6.55669e-17	7.80967e-13
ENSMUSG00000059741	1.06046e-30	-9.12792	-7.95242	-10.3034	3.04326e-28	9.79299	0.515122	Myl3	protein_coding	myosin, light polypeptide 3 [Source:MGI Symbol;Acc:MGI:97268]	0.946229	2	3.69754e-24	4.44518e-20
ENSMUSG00000060187	4.93347e-22	-4.9385	-3.90204	-5.97497	6.13022e-20	5.12797	0.0805582	Lrrc10	protein_coding	leucine rich repeat containing 10 [Source:MGI Symbol;Acc:MGI:2448063]	0.859037	2	6.06016e-21	7.2528e-17
ENSMUSG00000060600	4.10835e-16	-4.10887	-3.18099	-5.03676	2.86231e-14	10.408	6.21659	Eno3	protein_coding	enolase 3, beta muscle [Source:MGI Symbol;Acc:MGI:95395]	0.90842	2	1.10725e-16	1.3183e-12
ENSMUSG00000060913	5.45296e-34	-6.81292	-6.09664	-7.52919	2.3473e-31	7.24505	0.281845	Trim55	protein_coding	tripartite motif-containing 55 [Source:MGI Symbol;Acc:MGI:3036269]	0.971621	2	3.21912e-28	3.87872e-24
ENSMUSG00000061024	1.49757e-10	2.95305	3.72098	2.18511	4.8653e-09	1.65399	4.63311	Rrs1	protein_coding	ribosome biogenesis regulator 1 [Source:MGI Symbol;Acc:MGI:1929721]	0.778788	1	4.03969e-08	0.000459596
ENSMUSG00000061086	2.2356e-50	-9.86949	-9.09968	-10.6393	5.38913e-47	12.1159	2.06671	Myl4	protein_coding	myosin, light polypeptide 4 [Source:MGI Symbol;Acc:MGI:97267]	0.999627	2	8.34365e-25	1.00391e-20
ENSMUSG00000061462	7.27854e-19	-4.60245	-3.5745	-5.6304	6.90774e-17	4.90156	0.223739	Obscn	protein_coding	obscurin, cytoskeletal calmodulin and titin-interacting RhoGEF [Source:MGI Symbol;Acc:MGI:2681862]	0.843353	2	1.80938e-17	2.15678e-13
ENSMUSG00000061816	1.36393e-33	-8.8752	-7.90372	-9.84667	5.4798e-31	9.63544	0.593507	Myl1	protein_coding	myosin, light polypeptide 1 [Source:MGI Symbol;Acc:MGI:97269]	0.961445	2	6.30106e-26	7.58774e-22
ENSMUSG00000062078	3.20746e-20	-2.75925	-2.27206	-3.24644	3.48284e-18	11.2884	8.5278	Qk	protein_coding	quaking [Source:MGI Symbol;Acc:MGI:97837]	0.936893	2	7.57738e-19	9.05042e-15
ENSMUSG00000062209	2.8323e-16	-3.91036	-2.88901	-4.93171	2.0081e-14	4.11861	0.138006	Erbb4	protein_coding	erb-b2 receptor tyrosine kinase 4 [Source:MGI Symbol;Acc:MGI:104771]	0.800597	2	2.18791e-15	2.59748e-11
ENSMUSG00000062444	4.23198e-13	-3.18907	-2.16336	-4.21477	2.00819e-11	3.44183	0.177479	Ap3b2	protein_coding	adaptor-related protein complex 3, beta 2 subunit [Source:MGI Symbol;Acc:MGI:1100869]	0.770164	2	7.00571e-14	8.27374e-10
ENSMUSG00000063275	2.49245e-14	-3.74192	-2.90983	-4.57401	1.42377e-12	7.44883	3.62881	Hacd1	protein_coding	3-hydroxyacyl-CoA dehydratase 1 [Source:MGI Symbol;Acc:MGI:1353592]	0.881441	2	6.2822e-15	7.44818e-11
ENSMUSG00000063903	2.25316e-16	-3.28904	-2.35672	-4.22136	1.61651e-14	3.38499	0.00938592	Klk1	protein_coding	kallikrein 1 [Source:MGI Symbol;Acc:MGI:102850]	0.76699	2	1.67864e-15	1.99389e-11
ENSMUSG00000064179	1.16411e-13	-3.2364	-2.33547	-4.13733	6.12706e-12	3.55316	0.252071	Tnnt1	protein_coding	troponin T1, skeletal, slow [Source:MGI Symbol;Acc:MGI:1333868]	0.784727	2	5.85e-14	6.91119e-10
ENSMUSG00000067279	3.97187e-12	-3.86795	-2.73605	-4.99984	1.67388e-10	4.44584	0.498344	Ppp1r3c	protein_coding	protein phosphatase 1, regulatory (inhibitor) subunit 3C [Source:MGI Symbol;Acc:MGI:1858229]	0.780153	2	5.86658e-13	6.90204e-09
ENSMUSG00000067818	1.04023e-30	-7.67252	-6.74862	-8.59642	3.04326e-28	10.9074	3.06295	Myl9	protein_coding	myosin, light polypeptide 9, regulatory [Source:MGI Symbol;Acc:MGI:2138915]	0.98413	2	2.59183e-23	3.112e-19
ENSMUSG00000068566	4.21361e-11	-3.60858	-2.698	-4.51916	1.49813e-09	8.37268	4.67266	Myadm	protein_coding	myeloid-associated differentiation marker [Source:MGI Symbol;Acc:MGI:1355332]	0.829257	2	2.06932e-11	2.41738e-07
ENSMUSG00000068614	7.48197e-48	-11.3929	-10.4016	-12.3843	1.28829e-44	15.0117	3.41871	Actc1	protein_coding	actin, alpha, cardiac muscle 1 [Source:MGI Symbol;Acc:MGI:87905]	0.997946	2	3.1681e-24	3.809e-20
ENSMUSG00000068699	1.41447e-11	-3.58898	-2.70431	-4.47365	5.49953e-10	7.2923	3.62758	Flnc	protein_coding	filamin C, gamma [Source:MGI Symbol;Acc:MGI:95557]	0.828417	2	2.35871e-11	2.7545e-07
ENSMUSG00000068745	4.03517e-16	-4.15405	-3.05648	-5.25162	2.82767e-14	4.41165	0.146299	Mybphl	protein_coding	myosin binding protein H-like [Source:MGI Symbol;Acc:MGI:1916003]	0.79817	2	1.40594e-16	1.67307e-12
ENSMUSG00000069601	1.11094e-24	-5.83011	-4.96764	-6.69258	1.80948e-22	9.395	3.43583	Ank3	protein_coding	ankyrin 3, epithelial [Source:MGI Symbol;Acc:MGI:88026]	0.943615	2	1.68423e-19	2.0135e-15
ENSMUSG00000069662	7.6767e-26	4.61954	5.32314	3.91594	1.54212e-23	6.55732	11.2405	Marcks	protein_coding	myristoylated alanine rich protein kinase C substrate [Source:MGI Symbol;Acc:MGI:96907]	0.8722	3	9.85776e-15	1.16795e-10
ENSMUSG00000070348	1.35642e-11	3.94323	4.95979	2.92666	5.32437e-10	3.26876	7.27094	Ccnd1	protein_coding	cyclin D1 [Source:MGI Symbol;Acc:MGI:88313]	0.662424	1	0.00148359	1
ENSMUSG00000070407	7.78797e-12	3.4147	4.18897	2.64043	3.17123e-10	0.205411	3.65231	Hs3st3b1	protein_coding	heparan sulfate (glucosamine) 3-O-sulfotransferase 3B1 [Source:MGI Symbol;Acc:MGI:1333853]	0.72716	3	3.36469e-07	0.00375937
ENSMUSG00000070476	2.1331e-11	-2.95534	-2.09513	-3.81555	7.93526e-10	3.62842	0.622346	Fam217b	protein_coding	family with sequence similarity 217, member B [Source:MGI Symbol;Acc:MGI:1918782]	0.792289	2	4.0736e-12	4.77425e-08
ENSMUSG00000071317	2.19206e-12	-3.42747	-2.50428	-4.35065	9.53822e-11	4.77036	1.27789	Bves	protein_coding	blood vessel epicardial substance [Source:MGI Symbol;Acc:MGI:1346013]	0.822816	2	1.49738e-12	1.75882e-08
ENSMUSG00000072720	1.63411e-25	-4.69734	-3.84531	-5.54938	3.15951e-23	4.86772	0.0760538	Myo18b	protein_coding	myosin XVIIIb [Source:MGI Symbol;Acc:MGI:1921626]	0.897125	2	1.89272e-23	2.27316e-19
ENSMUSG00000073557	2.82863e-12	-3.73479	-2.74193	-4.72764	1.21272e-10	4.6852	0.890911	Ppp1r12b	protein_coding	protein phosphatase 1, regulatory (inhibitor) subunit 12B [Source:MGI Symbol;Acc:MGI:1916417]	0.809746	2	1.57853e-12	1.85383e-08
ENSMUSG00000074218	2.53076e-28	-5.59038	-4.83026	-6.3505	6.10065e-26	6.03242	0.324145	Cox7a1	protein_coding	cytochrome c oxidase subunit VIIa 1 [Source:MGI Symbol;Acc:MGI:1316714]	0.944735	2	1.6202e-25	1.95024e-21
ENSMUSG00000078937	1.39831e-18	-4.90648	-3.89218	-5.92078	1.28655e-16	5.51783	0.521988	Cpt1b	protein_coding	carnitine palmitoyltransferase 1b, muscle [Source:MGI Symbol;Acc:MGI:1098297]	0.868559	2	2.23626e-18	2.66853e-14
ENSMUSG00000079243	1.11831e-29	-6.27676	-5.42387	-7.12965	2.93022e-27	6.675	0.290193	Xirp1	protein_coding	xin actin-binding repeat containing 1 [Source:MGI Symbol;Acc:MGI:1333878]	0.939974	2	1.52496e-24	1.83453e-20
ENSMUSG00000090053	8.44007e-23	-5.33293	-4.44888	-6.21699	1.13031e-20	6.04752	0.629112	Palm2	protein_coding	paralemmin 2 [Source:MGI Symbol;Acc:MGI:1934601]	0.914395	2	2.58497e-20	3.09188e-16
ENSMUSG00000091898	8.51982e-39	-9.37547	-8.46963	-10.2813	7.33496e-36	11.1156	1.57397	Tnnc1	protein_coding	troponin C, cardiac/slow skeletal [Source:MGI Symbol;Acc:MGI:98779]	0.975915	2	7.24277e-24	8.70364e-20
ENSMUSG00000092035	2.90468e-19	4.69185	5.55325	3.83044	2.91751e-17	2.39621	7.18283	Peg10	protein_coding	paternally expressed 10 [Source:MGI Symbol;Acc:MGI:2157785]	0.724848	1	1.11429e-05	0.118817
ENSMUSG00000095464	9.66531e-22	-3.69687	-3.1555	-4.23825	1.16496e-19	4.57066	0.793865	Gm21987	protein_coding	predicted gene 21987 [Source:MGI Symbol;Acc:MGI:5439456]	0.918129	2	2.17427e-20	2.60107e-16
ENSMUSG00000096472	3.09794e-10	-3.55695	-2.60134	-4.51255	9.67343e-09	5.98941	2.36418	Cdkn2d	protein_coding	cyclin-dependent kinase inhibitor 2D (p19, inhibits CDK4) [Source:MGI Symbol;Acc:MGI:105387]	0.803025	2	2.67567e-10	3.10752e-06
ENSMUSG00000097487	1.04343e-29	-6.27373	-5.55161	-6.99585	2.79476e-27	7.19274	0.793015	Ptges3l	protein_coding	prostaglandin E synthase 3 (cytosolic)-like [Source:MGI Symbol;Acc:MGI:1916146]	0.956124	2	4.10173e-24	4.92987e-20
ENSMUSG00000110344	1.28431e-13	-3.83217	-2.96904	-4.69531	6.67232e-12	5.23251	1.33364	Gm45716	protein_coding	predicted gene 45716 [Source:MGI Symbol;Acc:MGI:5804831]	0.840179	2	1.25406e-13	1.47967e-09

## Sheet: Nkx2-5_cluster 3
geneID	pval	lfc	lfc.hi	lfc.lo	fdr.x	basemeanA	basemeanB	symbol	biotype	description	auroc	clusts	marker_pval	marker_fdr
ENSMUSG00000000253	1.24651e-07	2.92495	3.81919	2.03072	6.28629e-06	0.64806	3.6175	Gmpr	protein_coding	guanosine monophosphate reductase [Source:MGI Symbol;Acc:MGI:1913605]	0.854462	2	8.7368e-17	1.04047e-12
ENSMUSG00000000753	6.3981e-21	-5.43855	-4.46796	-6.40915	1.54233e-17	6.03849	0.5003	Serpinf1	protein_coding	serine (or cysteine) peptidase inhibitor, clade F, member 1 [Source:MGI Symbol;Acc:MGI:108080]	0.88011	3	5.94728e-20	7.11116e-16
ENSMUSG00000000805	1.0844e-09	4.34648	5.59717	3.0958	1.04562e-07	1.76566	6.19183	Car4	protein_coding	carbonic anhydrase 4 [Source:MGI Symbol;Acc:MGI:1096574]	0.872727	1	2.32865e-14	2.75433e-10
ENSMUSG00000001270	2.72737e-06	3.50488	4.76399	2.24578	8.11678e-05	2.8463	6.38545	Ckb	protein_coding	creatine kinase, brain [Source:MGI Symbol;Acc:MGI:88407]	0.927931	2	1.09826e-18	1.31143e-14
ENSMUSG00000001349	1.21437e-14	5.03722	6.02571	4.04873	5.85474e-12	0.423312	5.52014	Cnn1	protein_coding	calponin 1 [Source:MGI Symbol;Acc:MGI:104979]	0.992905	2	6.93521e-28	8.35485e-24
ENSMUSG00000001604	1.04815e-09	2.71843	3.43596	2.0009	1.02599e-07	0.29775	3.07211	Tcea3	protein_coding	transcription elongation factor A (SII), 3 [Source:MGI Symbol;Acc:MGI:1196908]	0.910941	2	3.0803e-22	3.69144e-18
ENSMUSG00000002100	1.68251e-12	4.27532	5.43763	3.11301	4.71612e-10	1.26155	5.55485	Mybpc3	protein_coding	myosin binding protein C, cardiac [Source:MGI Symbol;Acc:MGI:102844]	0.993839	2	9.06156e-26	1.09092e-21
ENSMUSG00000002985	3.08061e-10	4.11633	5.28448	2.94818	3.50289e-08	3.96952	8.15222	Apoe	protein_coding	apolipoprotein E [Source:MGI Symbol;Acc:MGI:88057]	0.728529	2	3.14101e-06	0.0341491
ENSMUSG00000003153	8.23332e-10	4.13038	5.34815	2.9126	8.20134e-08	3.35404	7.56315	Slc2a3	protein_coding	solute carrier family 2 (facilitated glucose transporter), member 3 [Source:MGI Symbol;Acc:MGI:95757]	0.7	1	8.50406e-05	0.862907
ENSMUSG00000004044	6.99608e-08	3.33034	4.34006	2.32062	3.88589e-06	0.797607	4.17441	Ptrf	protein_coding	polymerase I and transcript release factor [Source:MGI Symbol;Acc:MGI:1277968]	0.831777	2	1.16802e-13	1.37827e-09
ENSMUSG00000004085	4.36144e-11	4.25494	5.35004	3.15983	6.57105e-09	3.28627	7.6043	Map3k20	protein_coding	mitogen-activated protein kinase kinase kinase 20 [Source:MGI Symbol;Acc:MGI:2443258]	0.930919	2	1.73132e-18	2.06633e-14
ENSMUSG00000004187	1.32527e-21	5.34016	6.08231	4.598	3.99338e-18	0.556885	5.98249	Kifc2	protein_coding	kinesin family member C2 [Source:MGI Symbol;Acc:MGI:109187]	0.729293	1	3.09228e-06	0.0336286
ENSMUSG00000004661	1.18761e-09	3.13473	4.10989	2.15958	1.10963e-07	4.45138	7.68234	Arid3b	protein_coding	AT rich interactive domain 3B (BRIGHT-like) [Source:MGI Symbol;Acc:MGI:1930768]	0.759522	2	1.39029e-07	0.00156532
ENSMUSG00000004885	5.72182e-13	-4.57285	-3.50242	-5.64327	1.82264e-10	7.60084	2.95435	Crabp2	protein_coding	cellular retinoic acid binding protein II [Source:MGI Symbol;Acc:MGI:88491]	0.850871	3	7.11021e-14	8.39574e-10
ENSMUSG00000005087	2.53301e-10	3.66028	4.63822	2.68234	2.99317e-08	1.10869	4.8173	Cd44	protein_coding	CD44 antigen [Source:MGI Symbol;Acc:MGI:88338]	0.745612	2	2.12872e-07	0.00238779
ENSMUSG00000006221	5.86743e-10	2.99217	3.78983	2.19451	6.09656e-08	0.231295	3.28742	Hspb7	protein_coding	heat shock protein family, member 7 (cardiovascular) [Source:MGI Symbol;Acc:MGI:1352494]	0.952577	2	1.76046e-27	2.12065e-23
ENSMUSG00000006356	6.30139e-17	6.1844	7.38899	4.97981	6.32922e-14	3.5235	9.79092	Crip2	protein_coding	cysteine rich protein 2 [Source:MGI Symbol;Acc:MGI:1915587]	0.972367	2	6.73673e-22	8.06993e-18
ENSMUSG00000006360	1.41282e-09	3.40314	4.49357	2.31271	1.2999e-07	2.223	5.65084	Crip1	protein_coding	cysteine-rich protein 1 (intestinal) [Source:MGI Symbol;Acc:MGI:88501]	0.980769	2	1.21163e-23	1.45553e-19
ENSMUSG00000006498	5.4669e-10	-3.41721	-2.47805	-4.35638	5.72979e-08	8.99912	5.46242	Ptbp1	protein_coding	polypyrimidine tract binding protein 1 [Source:MGI Symbol;Acc:MGI:97791]	0.785816	3	2.67507e-09	3.07687e-05
ENSMUSG00000006800	1.24799e-11	-3.76873	-2.82897	-4.70849	2.38763e-09	6.55049	2.71732	Sulf2	protein_coding	sulfatase 2 [Source:MGI Symbol;Acc:MGI:1919293]	0.820476	3	1.98431e-11	2.31846e-07
ENSMUSG00000007122	1.53998e-07	3.44527	4.49392	2.39661	7.55782e-06	0.664777	4.15827	Casq1	protein_coding	calsequestrin 1 [Source:MGI Symbol;Acc:MGI:1309468]	0.914768	2	2.09999e-22	2.51746e-18
ENSMUSG00000008136	3.1349e-12	4.43347	5.40794	3.459	7.26633e-10	0.807159	5.30046	Fhl2	protein_coding	four and a half LIM domains 2 [Source:MGI Symbol;Acc:MGI:1338762]	0.890217	2	2.82215e-17	3.36287e-13
ENSMUSG00000010175	2.24695e-10	2.92543	3.72766	2.12319	2.76352e-08	0.793759	3.75524	Prox1	protein_coding	prospero homeobox 1 [Source:MGI Symbol;Acc:MGI:97772]	0.788648	2	1.08035e-09	1.24835e-05
ENSMUSG00000010760	2.48185e-10	4.62788	5.77751	3.47825	2.96176e-08	0.686235	5.37454	Phlda2	protein_coding	pleckstrin homology like domain, family A, member 2 [Source:MGI Symbol;Acc:MGI:1202307]	0.966869	1	2.01937e-24	2.42889e-20
ENSMUSG00000013936	1.39067e-08	3.31883	4.28528	2.35237	9.36411e-07	0.154985	3.5106	Myl2	protein_coding	myosin, light polypeptide 2, regulatory, cardiac, slow [Source:MGI Symbol;Acc:MGI:97272]	0.851942	2	7.76923e-18	9.26636e-14
ENSMUSG00000015968	3.01555e-09	2.86294	3.65745	2.06842	2.54171e-07	0.370255	3.28639	Cacna1d	protein_coding	calcium channel, voltage-dependent, L type, alpha 1D subunit [Source:MGI Symbol;Acc:MGI:88293]	0.909447	2	1.14381e-21	1.36982e-17
ENSMUSG00000018845	6.14151e-12	4.19288	5.31941	3.06635	1.27627e-09	1.06737	5.29564	Unc45b	protein_coding	unc-45 myosin chaperone B [Source:MGI Symbol;Acc:MGI:2443377]	0.995892	2	5.0549e-28	6.09015e-24
ENSMUSG00000019880	9.30463e-10	3.15643	4.07022	2.24264	9.19251e-08	0.591549	3.82467	Rspo3	protein_coding	R-spondin 3 [Source:MGI Symbol;Acc:MGI:1920030]	0.826465	1	5.01601e-13	5.90485e-09
ENSMUSG00000020186	3.9314e-11	2.95686	3.84752	2.06619	6.07502e-09	6.1048	9.10882	Csrp2	protein_coding	cysteine and glycine-rich protein 2 [Source:MGI Symbol;Acc:MGI:1202907]	0.960978	2	8.26659e-21	9.89263e-17
ENSMUSG00000020469	3.17691e-15	5.90554	7.16009	4.65099	1.91457e-12	4.55312	10.5299	Myl7	protein_coding	myosin, light polypeptide 7, regulatory [Source:MGI Symbol;Acc:MGI:107495]	0.999253	2	3.96288e-24	4.76338e-20
ENSMUSG00000020475	3.42472e-10	4.45559	5.69754	3.21364	3.82205e-08	1.05925	5.57248	Pgam2	protein_coding	phosphoglycerate mutase 2 [Source:MGI Symbol;Acc:MGI:1933118]	0.975355	2	2.05616e-27	2.47644e-23
ENSMUSG00000020542	1.76767e-17	4.81624	5.86398	3.7685	2.13057e-14	0.643057	5.5029	Myocd	protein_coding	myocardin [Source:MGI Symbol;Acc:MGI:2137495]	0.977035	2	1.4058e-26	1.693e-22
ENSMUSG00000020589	4.85251e-07	3.25739	4.33319	2.1816	1.91251e-05	0.99506	4.29994	Fam49a	protein_coding	family with sequence similarity 49, member A [Source:MGI Symbol;Acc:MGI:1261783]	0.869679	2	1.74858e-16	2.08029e-12
ENSMUSG00000021057	3.71422e-09	3.65665	4.89555	2.41774	2.96473e-07	2.80322	6.52736	Akap5	protein_coding	A kinase (PRKA) anchor protein 5 [Source:MGI Symbol;Acc:MGI:2685104]	0.869399	2	3.68253e-14	4.35348e-10
ENSMUSG00000021196	1.14807e-09	3.85726	4.88294	2.83158	1.08106e-07	1.67283	5.56468	Pfkp	protein_coding	phosphofructokinase, platelet [Source:MGI Symbol;Acc:MGI:1891833]	0.846714	2	7.81589e-13	9.19148e-09
ENSMUSG00000021200	3.29636e-10	3.65708	4.58659	2.72758	3.71318e-08	0.365922	4.08008	Asb2	protein_coding	ankyrin repeat and SOCS box-containing 2 [Source:MGI Symbol;Acc:MGI:1929743]	0.95463	2	2.04029e-27	2.45753e-23
ENSMUSG00000021217	2.25688e-12	-3.36085	-2.43447	-4.28724	5.79346e-10	3.90773	0.496695	Tshz3	protein_coding	teashirt zinc finger family member 3 [Source:MGI Symbol;Acc:MGI:2442819]	0.787771	3	1.96834e-12	2.31083e-08
ENSMUSG00000021313	6.37245e-11	4.19651	5.21467	3.17834	9.36672e-09	0.917341	5.14842	Ryr2	protein_coding	ryanodine receptor 2, cardiac [Source:MGI Symbol;Acc:MGI:99685]	0.959298	2	1.08437e-22	1.30103e-18
ENSMUSG00000021318	3.62323e-07	-3.05579	-2.00095	-4.11062	1.50589e-05	7.64325	4.50912	Gli3	protein_coding	GLI-Kruppel family member GLI3 [Source:MGI Symbol;Acc:MGI:95729]	0.743601	3	3.87039e-07	0.00431896
ENSMUSG00000021373	7.67385e-10	3.50674	4.48023	2.53325	7.70774e-08	1.67626	5.23417	Cap2	protein_coding	CAP, adenylate cyclase-associated protein, 2 (yeast) [Source:MGI Symbol;Acc:MGI:1914502]	0.946975	2	1.68947e-20	2.02145e-16
ENSMUSG00000021453	4.30774e-10	3.67135	4.61952	2.72318	4.67759e-08	1.36174	5.08447	Gadd45g	protein_coding	growth arrest and DNA-damage-inducible 45 gamma [Source:MGI Symbol;Acc:MGI:1346325]	0.761616	1	1.14389e-07	0.00129042
ENSMUSG00000021702	3.71149e-07	2.93569	3.86043	2.01096	1.53201e-05	0.424545	3.40519	Thbs4	protein_coding	thrombospondin 4 [Source:MGI Symbol;Acc:MGI:1101779]	0.900112	2	1.36198e-22	1.63356e-18
ENSMUSG00000021798	4.54735e-10	3.415	4.49249	2.33751	4.89368e-08	1.43025	4.86288	Ldb3	protein_coding	LIM domain binding 3 [Source:MGI Symbol;Acc:MGI:1344412]	0.974701	2	3.12217e-24	3.7541e-20
ENSMUSG00000021811	1.20135e-09	-2.95551	-2.12059	-3.79043	1.11384e-07	8.51419	5.4528	Dnajc9	protein_coding	DnaJ heat shock protein family (Hsp40) member C9 [Source:MGI Symbol;Acc:MGI:1915326]	0.796303	3	7.02385e-10	8.13151e-06
ENSMUSG00000021944	7.65646e-18	3.76438	4.69187	2.83689	1.02537e-14	0.918596	4.77582	Gata4	protein_coding	GATA binding protein 4 [Source:MGI Symbol;Acc:MGI:95664]	0.738237	2	4.85639e-07	0.00540468
ENSMUSG00000021990	1.4531e-11	3.14794	4.15772	2.13817	2.61405e-09	2.24869	5.46872	Spata13	protein_coding	spermatogenesis associated 13 [Source:MGI Symbol;Acc:MGI:104838]	0.71658	2	8.32191e-06	0.0891776
ENSMUSG00000022358	4.83847e-09	3.7102	4.7312	2.68921	3.71453e-07	0.838691	4.57695	Fbxo32	protein_coding	F-box protein 32 [Source:MGI Symbol;Acc:MGI:1914981]	0.953417	2	1.16074e-22	1.39242e-18
ENSMUSG00000022803	1.05553e-09	3.64021	4.85835	2.42206	1.02599e-07	2.73824	6.40159	Popdc2	protein_coding	popeye domain containing 2 [Source:MGI Symbol;Acc:MGI:1930150]	0.985063	2	8.40876e-24	1.01031e-19
ENSMUSG00000024049	1.7665e-10	3.9329	4.94192	2.92389	2.28943e-08	0.699731	4.66199	Myom1	protein_coding	myomesin 1 [Source:MGI Symbol;Acc:MGI:1341430]	0.964339	2	2.50624e-24	3.014e-20
ENSMUSG00000024803	1.59338e-18	4.16332	5.42408	2.90256	2.74357e-15	2.03138	6.18427	Ankrd1	protein_coding	ankyrin repeat domain 1 (cardiac muscle) [Source:MGI Symbol;Acc:MGI:1097717]	0.980583	2	4.52399e-23	5.42969e-19
ENSMUSG00000024805	8.82637e-13	2.90834	3.5995	2.21717	2.6596e-10	0.544998	3.49022	Pcgf5	protein_coding	polycomb group ring finger 5 [Source:MGI Symbol;Acc:MGI:1923505]	0.674646	1	0.000371529	1
ENSMUSG00000025104	9.78167e-12	-3.79835	-2.85892	-4.73779	1.96498e-09	6.40841	2.55509	Hdgfrp3	protein_coding	hepatoma-derived growth factor, related protein 3 [Source:MGI Symbol;Acc:MGI:1352760]	0.813544	3	4.35238e-11	5.07749e-07
ENSMUSG00000025255	2.814e-16	-4.31515	-3.33643	-5.29388	2.11982e-13	5.00814	0.636377	Zfhx4	protein_coding	zinc finger homeodomain 4 [Source:MGI Symbol;Acc:MGI:2137668]	0.81781	3	6.45765e-14	7.62778e-10
ENSMUSG00000026043	1.78441e-15	-4.08081	-3.10132	-5.0603	1.19486e-12	5.44616	1.2878	Col3a1	protein_coding	collagen, type III, alpha 1 [Source:MGI Symbol;Acc:MGI:88453]	0.844472	3	1.7266e-14	2.04292e-10
ENSMUSG00000026124	1.39601e-15	3.58806	4.35326	2.82287	9.89773e-13	0.105879	3.80202	Cfc1	protein_coding	cripto, FRL-1, cryptic family 1 [Source:MGI Symbol;Acc:MGI:109448]	0.836465	1	9.60385e-14	1.13383e-09
ENSMUSG00000026335	3.25335e-09	3.03439	3.93694	2.13183	2.7231e-07	4.19138	7.28198	Pam	protein_coding	peptidylglycine alpha-amidating monooxygenase [Source:MGI Symbol;Acc:MGI:97475]	0.974608	2	5.84382e-22	7.0009e-18
ENSMUSG00000026414	2.98741e-12	4.76037	6.10109	3.41964	7.08402e-10	2.45734	7.22939	Tnnt2	protein_coding	troponin T2, cardiac [Source:MGI Symbol;Acc:MGI:104597]	0.99888	2	1.50959e-24	1.81619e-20
ENSMUSG00000026430	1.38314e-07	3.15533	4.11781	2.19285	6.86154e-06	0.593217	3.79152	Rassf5	protein_coding	Ras association (RalGDS/AF-6) domain family member 5 [Source:MGI Symbol;Acc:MGI:1926375]	0.915235	2	1.13508e-22	1.36175e-18
ENSMUSG00000026576	2.66553e-12	3.55653	4.55051	2.56254	6.69327e-10	1.30288	4.88175	Atp1b1	protein_coding	ATPase, Na+/K+ transporting, beta 1 polypeptide [Source:MGI Symbol;Acc:MGI:88108]	0.977315	2	1.75686e-24	2.11333e-20
ENSMUSG00000026586	2.51118e-15	-4.86877	-3.834	-5.90354	1.59301e-12	6.59977	1.67109	Prrx1	protein_coding	paired related homeobox 1 [Source:MGI Symbol;Acc:MGI:97712]	0.854426	3	3.36767e-14	3.98194e-10
ENSMUSG00000026674	2.12348e-18	-4.15335	-3.2288	-5.0779	3.19929e-15	4.43749	0.219049	Ddr2	protein_coding	discoidin domain receptor family, member 2 [Source:MGI Symbol;Acc:MGI:1345277]	0.841628	3	1.8211e-17	2.17057e-13
ENSMUSG00000026817	3.02771e-06	3.49471	4.75163	2.2378	8.77236e-05	2.98655	6.52067	Ak1	protein_coding	adenylate kinase 1 [Source:MGI Symbol;Acc:MGI:87977]	0.95435	2	1.08234e-20	1.29513e-16
ENSMUSG00000027358	3.35966e-14	3.74765	4.50995	2.98535	1.26544e-11	0.342054	4.14402	Bmp2	protein_coding	bone morphogenetic protein 2 [Source:MGI Symbol;Acc:MGI:88177]	0.78798	1	1.15758e-09	1.33735e-05
ENSMUSG00000027684	1.95144e-09	-3.64734	-2.5384	-4.75628	1.69214e-07	5.08693	1.38852	Mecom	protein_coding	MDS1 and EVI1 complex locus [Source:MGI Symbol;Acc:MGI:95457]	0.774262	3	6.43484e-10	7.4509e-06
ENSMUSG00000027777	2.25913e-12	2.9994	3.77809	2.22072	5.79346e-10	4.21714	7.28824	Schip1	protein_coding	schwannomin interacting protein 1 [Source:MGI Symbol;Acc:MGI:1353557]	0.818148	2	1.06595e-10	1.24076e-06
ENSMUSG00000027858	2.96638e-08	3.09729	4.02102	2.17357	1.84298e-06	1.59791	4.73153	Tspan2	protein_coding	tetraspanin 2 [Source:MGI Symbol;Acc:MGI:1917997]	0.767924	2	2.66705e-08	0.00030415
ENSMUSG00000028273	5.31175e-13	4.41773	5.51206	3.32339	1.7784e-10	3.00507	7.50775	Pdlim5	protein_coding	PDZ and LIM domain 5 [Source:MGI Symbol;Acc:MGI:1927489]	0.975355	2	3.72274e-22	4.46096e-18
ENSMUSG00000028278	3.10333e-07	3.1816	4.31592	2.04728	1.3226e-05	4.15799	7.40207	Rragd	protein_coding	Ras-related GTP binding D [Source:MGI Symbol;Acc:MGI:1098604]	0.827296	2	2.93584e-11	3.4273e-07
ENSMUSG00000028328	1.69393e-09	3.82633	4.94254	2.71012	1.50125e-07	3.40186	7.26954	Tmod1	protein_coding	tropomodulin 1 [Source:MGI Symbol;Acc:MGI:98775]	0.9396	2	3.00757e-19	3.59404e-15
ENSMUSG00000028364	3.61054e-07	-3.36182	-2.11026	-4.61339	1.50581e-05	4.69648	1.29168	Tnc	protein_coding	tenascin C [Source:MGI Symbol;Acc:MGI:101922]	0.713118	3	4.39337e-07	0.00489597
ENSMUSG00000028480	1.4293e-08	3.1943	4.28687	2.10173	9.57077e-07	2.48565	5.73937	Glipr2	protein_coding	GLI pathogenesis-related 2 [Source:MGI Symbol;Acc:MGI:1917770]	0.678788	1	0.000405623	1
ENSMUSG00000028883	1.32554e-10	-4.48178	-3.29245	-5.67111	1.77011e-08	7.61668	3.05633	Sema3a	protein_coding	sema domain, immunoglobulin domain (Ig), short basic domain, secreted, (semaphorin) 3A [Source:MGI Symbol;Acc:MGI:107558]	0.808034	3	6.87227e-11	8.00757e-07
ENSMUSG00000029108	1.87225e-07	3.13818	4.20678	2.06958	8.81492e-06	3.1243	6.312	Pcdh7	protein_coding	protocadherin 7 [Source:MGI Symbol;Acc:MGI:1860487]	0.741038	2	9.09349e-07	0.0100529
ENSMUSG00000029826	8.4339e-09	3.36401	4.37689	2.35113	6.01502e-07	0.453814	3.89563	Zc3hav1	protein_coding	zinc finger CCCH type, antiviral 1 [Source:MGI Symbol;Acc:MGI:1926031]	0.872525	1	1.28861e-17	1.53641e-13
ENSMUSG00000029838	4.24949e-32	-7.26904	-6.46952	-8.06857	5.12191e-28	9.25994	1.83725	Ptn	protein_coding	pleiotrophin [Source:MGI Symbol;Acc:MGI:97804]	0.968361	3	1.63383e-23	1.9624e-19
ENSMUSG00000030470	6.00643e-10	4.20034	5.33281	3.06787	6.18765e-08	0.954542	5.19941	Csrp3	protein_coding	cysteine and glycine-rich protein 3 [Source:MGI Symbol;Acc:MGI:1330824]	0.993465	2	2.51657e-28	3.03247e-24
ENSMUSG00000030551	4.92559e-14	-4.34228	-3.37816	-5.30639	1.79903e-11	7.89604	3.42874	Nr2f2	protein_coding	nuclear receptor subfamily 2, group F, member 2 [Source:MGI Symbol;Acc:MGI:1352452]	0.827231	3	7.06991e-12	8.27321e-08
ENSMUSG00000031548	1.36395e-08	-3.76797	-2.5737	-4.96224	9.23576e-07	6.80414	2.99315	Sfrp1	protein_coding	secreted frizzled-related protein 1 [Source:MGI Symbol;Acc:MGI:892014]	0.770885	3	9.66721e-09	0.000110719
ENSMUSG00000031626	1.84489e-07	3.34243	4.44763	2.23723	8.72018e-06	1.5212	4.88841	Sorbs2	protein_coding	sorbin and SH3 domain containing 2 [Source:MGI Symbol;Acc:MGI:1924574]	0.976288	2	2.79708e-24	3.36349e-20
ENSMUSG00000031965	1.13396e-21	5.67772	6.61528	4.74016	3.99338e-18	1.30193	7.08524	Tbx20	protein_coding	T-box 20 [Source:MGI Symbol;Acc:MGI:1888496]	0.818521	2	5.10212e-11	5.9501e-07
ENSMUSG00000031972	4.2627e-12	4.11203	5.39704	2.82702	9.5145e-10	0.890427	5.05377	Acta1	protein_coding	actin, alpha 1, skeletal muscle [Source:MGI Symbol;Acc:MGI:87902]	0.857916	2	5.48552e-14	6.48224e-10
ENSMUSG00000032024	1.62134e-11	-3.43108	-2.52138	-4.34077	2.87382e-09	4.99579	1.51154	Clmp	protein_coding	CXADR-like membrane protein [Source:MGI Symbol;Acc:MGI:1918816]	0.811589	3	1.39133e-11	1.6266e-07
ENSMUSG00000032060	4.57133e-12	4.778	5.92588	3.63011	9.83898e-10	1.30955	6.1421	Cryab	protein_coding	crystallin, alpha B [Source:MGI Symbol;Acc:MGI:88516]	0.951923	2	1.59682e-22	1.91475e-18
ENSMUSG00000032085	2.81515e-11	4.84625	6.07739	3.61512	4.58528e-09	2.86195	7.78141	Tagln	protein_coding	transgelin [Source:MGI Symbol;Acc:MGI:106012]	0.951456	2	2.43343e-20	2.91087e-16
ENSMUSG00000032228	5.01302e-10	-3.31934	-2.35713	-4.28156	5.30017e-08	8.37408	5.00948	Tcf12	protein_coding	transcription factor 12 [Source:MGI Symbol;Acc:MGI:101877]	0.820832	3	2.46453e-11	2.87759e-07
ENSMUSG00000032231	6.69051e-08	3.26872	4.45054	2.0869	3.76826e-06	2.35793	5.68562	Anxa2	protein_coding	annexin A2 [Source:MGI Symbol;Acc:MGI:88246]	0.635736	2	0.00484951	1
ENSMUSG00000032291	2.22229e-14	-4.35081	-3.42847	-5.27315	9.56617e-12	8.17447	3.72788	Crabp1	protein_coding	cellular retinoic acid binding protein I [Source:MGI Symbol;Acc:MGI:88490]	0.859136	3	5.95815e-14	7.03836e-10
ENSMUSG00000032387	2.59481e-10	3.56431	4.53451	2.59411	3.03511e-08	3.15822	6.77731	Rbpms2	protein_coding	RNA binding protein with multiple splicing 2 [Source:MGI Symbol;Acc:MGI:1919223]	0.728155	2	3.38419e-06	0.0367557
ENSMUSG00000032394	5.38794e-19	-4.87105	-4.01198	-5.73011	1.08235e-15	7.66047	2.67508	Igdcc3	protein_coding	immunoglobulin superfamily, DCC subclass, member 3 [Source:MGI Symbol;Acc:MGI:1202390]	0.89193	3	2.17157e-16	2.58308e-12
ENSMUSG00000033060	1.42993e-10	3.60827	4.49392	2.72263	1.87337e-08	0.877888	4.52521	Lmo7	protein_coding	LIM domain only 7 [Source:MGI Symbol;Acc:MGI:1353586]	0.914488	2	4.16845e-19	4.98046e-15
ENSMUSG00000033837	7.97688e-25	6.74594	7.55841	5.93348	4.80727e-21	0.239902	7.13815	Foxh1	protein_coding	forkhead box H1 [Source:MGI Symbol;Acc:MGI:1347465]	0.761212	1	7.81297e-08	0.000884662
ENSMUSG00000035274	8.75733e-12	-3.38201	-2.4954	-4.26862	1.78902e-09	4.7086	1.27899	Tpbg	protein_coding	trophoblast glycoprotein [Source:MGI Symbol;Acc:MGI:1341264]	0.815677	3	6.18033e-12	7.23654e-08
ENSMUSG00000035458	6.17265e-09	3.39282	4.48084	2.30479	4.53652e-07	1.04223	4.46052	Tnni3	protein_coding	troponin I, cardiac 3 [Source:MGI Symbol;Acc:MGI:98783]	0.893017	2	1.10917e-18	1.32434e-14
ENSMUSG00000035783	5.86617e-12	6.19904	7.71455	4.68353	1.24044e-09	2.79072	9.02944	Acta2	protein_coding	actin, alpha 2, smooth muscle, aorta [Source:MGI Symbol;Acc:MGI:87909]	0.993839	2	4.36417e-24	5.24486e-20
ENSMUSG00000036242	2.95955e-07	3.79201	5.08947	2.49456	1.27398e-05	4.44546	8.29944	3632451O06Rik	protein_coding	RIKEN cDNA 3632451O06 gene [Source:MGI Symbol;Acc:MGI:1914669]	0.862211	2	1.71072e-13	2.01728e-09
ENSMUSG00000036602	2.18227e-16	-4.27935	-3.34539	-5.21332	1.75353e-13	4.96396	0.625417	Alx1	protein_coding	ALX homeobox 1 [Source:MGI Symbol;Acc:MGI:104621]	0.838784	3	3.04254e-15	3.61028e-11
ENSMUSG00000037335	3.04758e-06	3.33013	4.49712	2.16313	8.80875e-05	1.70282	5.06661	Hand1	protein_coding	heart and neural crest derivatives expressed transcript 1 [Source:MGI Symbol;Acc:MGI:103577]	0.886465	1	2.19366e-15	2.60409e-11
ENSMUSG00000038086	3.08496e-14	4.6865	5.65956	3.71344	1.19945e-11	0.313513	5.05453	Hspb2	protein_coding	heat shock protein 2 [Source:MGI Symbol;Acc:MGI:1916503]	0.951456	2	6.9187e-25	8.32527e-21
ENSMUSG00000038132	7.34688e-11	4.31396	5.39252	3.2354	1.05419e-08	2.18873	6.55264	Rbm24	protein_coding	RNA binding motif protein 24 [Source:MGI Symbol;Acc:MGI:3610364]	0.962285	2	2.29716e-21	2.75062e-17
ENSMUSG00000038239	2.63768e-08	2.94029	3.78604	2.09454	1.68211e-06	0.504596	3.48385	Hrc	protein_coding	histidine rich calcium binding protein [Source:MGI Symbol;Acc:MGI:96226]	0.930732	2	8.27939e-24	9.94852e-20
ENSMUSG00000038244	5.51936e-09	2.78415	3.54749	2.02082	4.13198e-07	0.245914	3.07059	Mical2	protein_coding	microtubule associated monooxygenase, calponin and LIM domain containing 2 [Source:MGI Symbol;Acc:MGI:2444947]	0.916449	2	1.61614e-23	1.94131e-19
ENSMUSG00000038633	4.32518e-11	3.0448	3.91294	2.17667	6.57105e-09	5.29835	8.42545	Degs1	protein_coding	delta(4)-desaturase, sphingolipid 1 [Source:MGI Symbol;Acc:MGI:1097711]	0.692929	1	0.000167629	1
ENSMUSG00000038668	5.64746e-17	-5.30374	-4.30019	-6.30728	6.18807e-14	7.45055	2.06089	Lpar1	protein_coding	lysophosphatidic acid receptor 1 [Source:MGI Symbol;Acc:MGI:108429]	0.865624	3	2.76394e-15	3.28052e-11
ENSMUSG00000038679	7.77443e-07	-3.1158	-2.01429	-4.21731	2.88324e-05	5.80169	2.64625	Trps1	protein_coding	transcriptional repressor GATA binding 1 [Source:MGI Symbol;Acc:MGI:1927616]	0.743512	3	2.36239e-07	0.0026473
ENSMUSG00000038763	8.94773e-08	3.77429	5.05329	2.49529	4.77199e-06	3.93996	7.78605	Alpk3	protein_coding	alpha-kinase 3 [Source:MGI Symbol;Acc:MGI:2151224]	0.930172	2	1.56638e-18	1.86963e-14
ENSMUSG00000039103	7.75686e-11	3.98676	5.135	2.83851	1.09992e-08	3.79477	7.80406	Nexn	protein_coding	nexilin [Source:MGI Symbol;Acc:MGI:1916060]	0.987117	2	4.00454e-23	4.80665e-19
ENSMUSG00000039770	7.23511e-07	3.16608	4.25105	2.08111	2.73369e-05	2.31884	5.51913	Ypel5	protein_coding	yippee-like 5 (Drosophila) [Source:MGI Symbol;Acc:MGI:1916937]	0.897965	2	1.30309e-16	1.55107e-12
ENSMUSG00000039910	3.46231e-15	4.01156	4.85181	3.17131	1.9872e-12	2.13943	6.21986	Cited2	protein_coding	Cbp/p300-interacting transactivator, with Glu/Asp-rich carboxy-terminal domain, 2 [Source:MGI Symbol;Acc:MGI:1306784]	0.696768	1	0.000112523	1
ENSMUSG00000040653	4.16645e-10	3.20869	4.02392	2.39345	4.56529e-08	0.337824	3.59202	Ppp1r14c	protein_coding	protein phosphatase 1, regulatory (inhibitor) subunit 14c [Source:MGI Symbol;Acc:MGI:1923392]	0.924664	2	1.41655e-22	1.69887e-18
ENSMUSG00000040666	1.04327e-11	4.89259	6.01706	3.76811	2.0614e-09	1.16404	6.11133	Sh3bgr	protein_coding	SH3-binding domain glutamic acid-rich protein [Source:MGI Symbol;Acc:MGI:1354740]	0.996639	2	7.59418e-26	9.14339e-22
ENSMUSG00000040694	4.31907e-09	3.30342	4.19026	2.41659	3.38037e-07	0.336173	3.70298	Apobec2	protein_coding	apolipoprotein B mRNA editing enzyme, catalytic polypeptide 2 [Source:MGI Symbol;Acc:MGI:1343178]	0.927745	2	5.34055e-25	6.42682e-21
ENSMUSG00000040723	6.47603e-08	3.2397	4.20543	2.27397	3.68187e-06	1.00928	4.27565	Rcsd1	protein_coding	RCSD domain containing 1 [Source:MGI Symbol;Acc:MGI:2676394]	0.96714	2	2.03737e-23	2.44668e-19
ENSMUSG00000040752	1.29331e-11	3.79796	5.24319	2.35274	2.42126e-09	3.01318	6.80572	Myh6	protein_coding	myosin, heavy polypeptide 6, cardiac muscle, alpha [Source:MGI Symbol;Acc:MGI:97255]	0.973301	2	2.00037e-22	2.39825e-18
ENSMUSG00000041476	2.2364e-08	3.38219	4.38373	2.38065	1.46496e-06	0.596115	4.02217	Smpx	protein_coding	small muscle protein, X-linked [Source:MGI Symbol;Acc:MGI:1913356]	0.919436	2	2.46782e-23	2.96336e-19
ENSMUSG00000041957	2.70602e-11	3.60026	4.48438	2.71614	4.4679e-09	1.134	4.7824	Pkp2	protein_coding	plakophilin 2 [Source:MGI Symbol;Acc:MGI:1914701]	0.854089	2	1.11206e-13	1.31246e-09
ENSMUSG00000044938	7.04967e-08	3.641	4.72661	2.5554	3.89769e-06	0.760279	4.45179	Klhl31	protein_coding	kelch-like 31 [Source:MGI Symbol;Acc:MGI:3045305]	0.918036	2	2.12808e-21	2.54838e-17
ENSMUSG00000045215	3.48738e-12	-3.12326	-2.24287	-4.00364	7.93083e-10	3.96094	0.788187	Asxl3	protein_coding	additional sex combs like 3 (Drosophila) [Source:MGI Symbol;Acc:MGI:2685175]	0.80839	3	1.05499e-12	1.23993e-08
ENSMUSG00000045667	2.14275e-11	3.87415	4.94248	2.80581	3.63755e-09	3.02128	6.97592	Smtnl2	protein_coding	smoothelin-like 2 [Source:MGI Symbol;Acc:MGI:2442764]	0.71938	2	7.65212e-06	0.0821302
ENSMUSG00000046402	1.85584e-09	-3.23608	-2.23694	-4.23521	1.6209e-07	4.93739	1.66145	Rbp1	protein_coding	retinol binding protein 1, cellular [Source:MGI Symbol;Acc:MGI:97876]	0.760487	3	8.03851e-09	9.21053e-05
ENSMUSG00000046982	9.63383e-08	-3.2585	-2.19921	-4.31779	5.09577e-06	6.40551	3.08854	Tshz1	protein_coding	teashirt zinc finger family member 1 [Source:MGI Symbol;Acc:MGI:1346031]	0.762264	3	3.07923e-08	0.000350847
ENSMUSG00000047261	9.1615e-15	-3.64863	-2.71295	-4.5843	4.60098e-12	4.01347	0.286043	Gap43	protein_coding	growth associated protein 43 [Source:MGI Symbol;Acc:MGI:95639]	0.796925	3	5.07097e-15	6.01315e-11
ENSMUSG00000047786	2.12555e-16	-5.35272	-4.22827	-6.47718	1.75353e-13	6.82428	1.38613	Lix1	protein_coding	limb and CNS expressed 1 [Source:MGI Symbol;Acc:MGI:1913893]	0.874511	3	1.32054e-16	1.57171e-12
ENSMUSG00000048915	4.78475e-11	-4.13801	-3.07518	-5.20085	7.11983e-09	9.7941	5.51966	Efna5	protein_coding	ephrin A5 [Source:MGI Symbol;Acc:MGI:107444]	0.847672	3	4.34888e-13	5.12124e-09
ENSMUSG00000049001	6.90133e-14	-3.36017	-2.33347	-4.38686	2.44652e-11	3.73345	0.277887	Ndnf	protein_coding	neuron-derived neurotrophic factor [Source:MGI Symbol;Acc:MGI:1915419]	0.771952	3	6.80725e-14	8.04004e-10
ENSMUSG00000049382	7.27818e-11	4.4257	5.59852	3.25288	1.05419e-08	3.30198	7.80344	Krt8	protein_coding	keratin 8 [Source:MGI Symbol;Acc:MGI:96705]	0.826061	1	1.57986e-10	1.83754e-06
ENSMUSG00000050953	3.95635e-08	-3.22591	-2.20615	-4.24567	2.39627e-06	10.0731	6.73253	Gja1	protein_coding	gap junction protein, alpha 1 [Source:MGI Symbol;Acc:MGI:95713]	0.742979	3	4.32574e-07	0.0048219
ENSMUSG00000051747	1.40456e-14	4.76703	6.33819	3.19586	6.5112e-12	3.89514	8.6244	Ttn	protein_coding	titin [Source:MGI Symbol;Acc:MGI:98864]	0.998693	2	3.94166e-24	4.73826e-20
ENSMUSG00000052374	1.18352e-10	4.39318	5.46099	3.32538	1.60281e-08	0.404141	4.86428	Actn2	protein_coding	actinin alpha 2 [Source:MGI Symbol;Acc:MGI:109192]	0.944268	2	1.81839e-25	2.18861e-21
ENSMUSG00000053093	1.56446e-09	4.56147	5.90179	3.22115	1.41593e-07	1.43292	6.01302	Myh7	protein_coding	myosin, heavy polypeptide 7, cardiac muscle, beta [Source:MGI Symbol;Acc:MGI:2155600]	0.961445	2	2.66871e-22	3.19845e-18
ENSMUSG00000054640	3.49577e-13	4.40818	5.35196	3.4644	1.20384e-10	0.204269	4.66343	Slc8a1	protein_coding	solute carrier family 8 (sodium/calcium exchanger), member 1 [Source:MGI Symbol;Acc:MGI:107956]	0.987864	2	5.02073e-29	6.05048e-25
ENSMUSG00000054889	5.74633e-13	4.17623	5.15463	3.19784	1.82264e-10	3.35493	7.58855	Dsp	protein_coding	desmoplakin [Source:MGI Symbol;Acc:MGI:109611]	0.798264	2	1.38747e-09	1.60226e-05
ENSMUSG00000056900	2.31745e-11	3.31232	4.10332	2.52133	3.87947e-09	0.979062	4.32861	Usp13	protein_coding	ubiquitin specific peptidase 13 (isopeptidase T-3) [Source:MGI Symbol;Acc:MGI:1919857]	0.75084	2	1.57197e-07	0.00176784
ENSMUSG00000058056	2.04807e-10	3.89271	4.94448	2.84093	2.59177e-08	3.78363	7.73104	Palld	protein_coding	palladin, cytoskeletal associated protein [Source:MGI Symbol;Acc:MGI:1919583]	0.952016	2	4.25234e-20	5.08495e-16
ENSMUSG00000058571	6.03821e-08	-3.22101	-2.15409	-4.28792	3.51587e-06	5.02785	1.77041	Gpc6	protein_coding	glypican 6 [Source:MGI Symbol;Acc:MGI:1346322]	0.751955	3	4.35444e-08	0.000495274
ENSMUSG00000059741	5.75962e-09	4.62796	5.88865	3.36727	4.25894e-07	0.698016	5.37947	Myl3	protein_coding	myosin, light polypeptide 3 [Source:MGI Symbol;Acc:MGI:97268]	0.946229	2	3.69754e-24	4.44518e-20
ENSMUSG00000060206	6.10496e-15	-3.70195	-2.94125	-4.46265	3.34468e-12	6.63601	2.85338	Zfp462	protein_coding	zinc finger protein 462 [Source:MGI Symbol;Acc:MGI:107690]	0.859581	3	5.07814e-14	6.00134e-10
ENSMUSG00000060572	9.98551e-13	-3.57355	-2.64664	-4.50045	2.9355e-10	9.00189	5.36579	Mfap2	protein_coding	microfibrillar-associated protein 2 [Source:MGI Symbol;Acc:MGI:99559]	0.855492	3	1.34724e-13	1.58934e-09
ENSMUSG00000060913	1.46087e-09	3.41666	4.30486	2.52846	1.33393e-07	0.440084	3.92008	Trim55	protein_coding	tripartite motif-containing 55 [Source:MGI Symbol;Acc:MGI:3036269]	0.971621	2	3.21912e-28	3.87872e-24
ENSMUSG00000061086	3.82966e-08	4.69501	6.1123	3.27771	2.33126e-06	2.47913	7.20729	Myl4	protein_coding	myosin, light polypeptide 4 [Source:MGI Symbol;Acc:MGI:97267]	0.999627	2	8.34365e-25	1.00391e-20
ENSMUSG00000061816	2.81877e-10	4.69214	5.85177	3.53251	3.23568e-08	0.648475	5.40786	Myl1	protein_coding	myosin, light polypeptide 1 [Source:MGI Symbol;Acc:MGI:97269]	0.961445	2	6.30106e-26	7.58774e-22
ENSMUSG00000062908	1.14202e-09	3.16184	4.078	2.24568	1.08106e-07	2.40258	5.61443	Acadm	protein_coding	acyl-Coenzyme A dehydrogenase, medium chain [Source:MGI Symbol;Acc:MGI:87867]	0.722928	2	5.4934e-06	0.0592628
ENSMUSG00000063445	7.22639e-09	-2.97275	-2.08392	-3.86158	5.24697e-07	8.066	5.01945	Nmral1	protein_coding	NmrA-like family domain containing 1 [Source:MGI Symbol;Acc:MGI:1915074]	0.785638	3	2.55537e-09	2.9397e-05
ENSMUSG00000067786	2.61886e-10	-3.27002	-2.39609	-4.14395	3.03511e-08	6.30954	2.96546	Nnat	protein_coding	neuronatin [Source:MGI Symbol;Acc:MGI:104716]	0.788838	3	1.26322e-09	1.45901e-05
ENSMUSG00000067818	5.00271e-07	3.91715	5.25178	2.58253	1.95772e-05	3.22038	7.17406	Myl9	protein_coding	myosin, light polypeptide 9, regulatory [Source:MGI Symbol;Acc:MGI:2138915]	0.98413	2	2.59183e-23	3.112e-19
ENSMUSG00000068566	1.88848e-14	4.2151	5.16027	3.26992	8.43033e-12	3.23434	7.51621	Myadm	protein_coding	myeloid-associated differentiation marker [Source:MGI Symbol;Acc:MGI:1355332]	0.829257	2	2.06932e-11	2.41738e-07
ENSMUSG00000068614	1.16013e-11	5.41832	7.10349	3.73315	2.25532e-09	3.91463	9.33697	Actc1	protein_coding	actin, alpha, cardiac muscle 1 [Source:MGI Symbol;Acc:MGI:87905]	0.997946	2	3.1681e-24	3.809e-20
ENSMUSG00000069378	4.71573e-10	2.91658	3.67487	2.15829	5.02997e-08	0.639198	3.60246	Prdm6	protein_coding	PR domain containing 6 [Source:MGI Symbol;Acc:MGI:2684938]	0.811212	1	4.79507e-11	5.59248e-07
ENSMUSG00000069662	3.40154e-11	-3.1949	-2.36098	-4.02881	5.39457e-09	11.6995	8.4555	Marcks	protein_coding	myristoylated alanine rich protein kinase C substrate [Source:MGI Symbol;Acc:MGI:96907]	0.8722	3	9.85776e-15	1.16795e-10
ENSMUSG00000070304	2.40198e-08	-3.85351	-2.59891	-5.10811	1.55651e-06	5.53917	1.63112	Scn2b	protein_coding	sodium channel, voltage-gated, type II, beta [Source:MGI Symbol;Acc:MGI:106921]	0.746001	3	1.51648e-08	0.000173379
ENSMUSG00000070407	2.25717e-09	-3.36608	-2.26911	-4.46305	1.94326e-07	4.62189	1.22474	Hs3st3b1	protein_coding	heparan sulfate (glucosamine) 3-O-sulfotransferase 3B1 [Source:MGI Symbol;Acc:MGI:1333853]	0.72716	3	3.36469e-07	0.00375937
ENSMUSG00000070526	2.94311e-14	-4.94659	-3.9488	-5.94438	1.18245e-11	8.82978	3.74748	Peg12	protein_coding	paternally expressed 12 [Source:MGI Symbol;Acc:MGI:1351637]	0.856381	3	4.434e-14	5.24098e-10
ENSMUSG00000074218	3.44475e-09	2.92357	3.71086	2.13627	2.84216e-07	0.375979	3.35326	Cox7a1	protein_coding	cytochrome c oxidase subunit VIIa 1 [Source:MGI Symbol;Acc:MGI:1316714]	0.944735	2	1.6202e-25	1.95024e-21
ENSMUSG00000079243	2.34163e-10	3.37853	4.22047	2.5366	2.84292e-08	0.291109	3.71243	Xirp1	protein_coding	xin actin-binding repeat containing 1 [Source:MGI Symbol;Acc:MGI:1333878]	0.939974	2	1.52496e-24	1.83453e-20
ENSMUSG00000090053	3.28119e-09	3.07426	3.90453	2.24398	2.72746e-07	0.501229	3.61029	Palm2	protein_coding	paralemmin 2 [Source:MGI Symbol;Acc:MGI:1934601]	0.914395	2	2.58497e-20	3.09188e-16
ENSMUSG00000091898	3.56487e-10	4.80224	6.11895	3.48552	3.94196e-08	1.74772	6.58516	Tnnc1	protein_coding	troponin C, cardiac/slow skeletal [Source:MGI Symbol;Acc:MGI:98779]	0.975915	2	7.24277e-24	8.70364e-20
ENSMUSG00000102252	1.21965e-12	3.19252	4.06909	2.31596	3.50012e-10	5.10385	8.35545	Snrpn	protein_coding	small nuclear ribonucleoprotein N [Source:MGI Symbol;Acc:MGI:98347]	0.716019	2	1.16291e-05	0.123931
