# Supplementary material for: Single cell RNA-seq and ATAC-seq analysis of cardiac progenitor cell transition states and lineage settlement
Source: Nat Commun. 2018 Nov 19;9:4877. doi: 10.1038/s41467-018-07307-6 (PMC6242939; doi:10.1038/s41467-018-07307-6)
Supplement: Supplementary file 6 — Supplementary Data 2 [file 41467_2018_7307_MOESM6_ESM.xlsx]

## Sheet: Isl1_cluster 1
geneID	pval	lfc	lfc.hi	lfc.lo	fdr.x	basemeanA	basemeanB	symbol	biotype	description	auroc	clusts	marker_pval	marker_fdr
ENSMUSG00000001240	9.04094e-13	-7.30502	-5.72039	-8.88965	9.08087e-10	8.91637	1.10769	Ramp2	protein_coding	receptor (calcitonin) activity modifying protein 2 [Source:MGI Symbol;Acc:MGI:1859650]	0.987387	1	4.54164e-13	5.40274e-09
ENSMUSG00000001946	3.52247e-14	-6.97349	-4.63162	-9.31536	7.07606e-11	7.62575	0.136632	Esam	protein_coding	endothelial cell-specific adhesion molecule [Source:MGI Symbol;Acc:MGI:1916774]	0.911261	1	1.29491e-20	1.5561e-16
ENSMUSG00000003518	2.34987e-06	-5.54874	-3.72196	-7.37551	0.00042273	9.71228	3.77994	Dusp3	protein_coding	dual specificity phosphatase 3 (vaccinia virus phosphatase VH1-related) [Source:MGI Symbol;Acc:MGI:1919599]	0.918018	1	6.17637e-07	0.00704168
ENSMUSG00000004040	7.86e-05	-4.10095	-2.02643	-6.17547	0.00712305	5.67513	1.36737	Stat3	protein_coding	signal transducer and activator of transcription 3 [Source:MGI Symbol;Acc:MGI:103038]	0.822072	1	1.07254e-05	0.118987
ENSMUSG00000004044	1.79431e-06	-5.21663	-2.53831	-7.89495	0.000327679	6.677	1.26891	Ptrf	protein_coding	polymerase I and transcript release factor [Source:MGI Symbol;Acc:MGI:1277968]	0.79527	1	8.88255e-05	0.95141
ENSMUSG00000004451	1.48357e-05	-3.64107	-2.21524	-5.0669	0.00184354	10.1662	6.25426	Ralb	protein_coding	v-ral simian leukemia viral oncogene B [Source:MGI Symbol;Acc:MGI:1927244]	0.94009	1	3.23033e-07	0.00369614
ENSMUSG00000004837	3.30593e-14	-5.55122	-3.6849	-7.41754	7.07606e-11	6.08679	0.209976	Grap	protein_coding	GRB2-related adaptor protein [Source:MGI Symbol;Acc:MGI:1918770]	0.901351	1	4.32761e-13	5.14856e-09
ENSMUSG00000005397	3.73988e-07	-5.83649	-3.91033	-7.76265	7.75205e-05	8.72227	2.51606	Nid1	protein_coding	nidogen 1 [Source:MGI Symbol;Acc:MGI:97342]	0.914414	1	4.59709e-07	0.00525171
ENSMUSG00000006311	5.92518e-06	-5.32185	-2.93256	-7.71113	0.000881682	6.8415	1.19783	Etv2	protein_coding	ets variant 2 [Source:MGI Symbol;Acc:MGI:99253]	0.846847	1	4.55291e-08	0.000527136
ENSMUSG00000006386	7.20818e-14	-6.85822	-4.89352	-8.82291	1.20713e-10	7.83322	0.615254	Tek	protein_coding	endothelial-specific receptor tyrosine kinase [Source:MGI Symbol;Acc:MGI:98664]	0.93491	1	1.82678e-10	2.15158e-06
ENSMUSG00000008398	2.78807e-11	-6.83661	-5.19215	-8.48107	1.34418e-08	8.48539	1.18321	Elk3	protein_coding	ELK3, member of ETS oncogene family [Source:MGI Symbol;Acc:MGI:101762]	0.978829	1	5.48208e-12	6.5012e-08
ENSMUSG00000015053	3.29973e-06	-4.21204	-2.26921	-6.15487	0.000552384	5.2885	0.828973	Gata2	protein_coding	GATA binding protein 2 [Source:MGI Symbol;Acc:MGI:95662]	0.852252	1	2.80468e-08	0.000325174
ENSMUSG00000016087	2.51552e-11	-7.88366	-5.92457	-9.84276	1.31824e-08	10.7786	2.41611	Fli1	protein_coding	Friend leukemia integration 1 [Source:MGI Symbol;Acc:MGI:95554]	0.977928	1	3.02773e-09	3.53457e-05
ENSMUSG00000016494	7.87313e-12	-5.23892	-3.18149	-7.29635	4.74474e-09	5.74462	0.116248	Cd34	protein_coding	CD34 antigen [Source:MGI Symbol;Acc:MGI:88329]	0.908108	1	2.52981e-20	3.03931e-16
ENSMUSG00000017144	6.20999e-05	4.12508	5.74299	2.50718	0.00603621	1.60647	5.86612	Rnd3	protein_coding	Rho family GTPase 3 [Source:MGI Symbol;Acc:MGI:1921444]	0.690545	5	0.000474993	1
ENSMUSG00000017774	7.17946e-09	-5.88481	-4.2505	-7.51913	2.21882e-06	7.75297	1.46133	Myo1c	protein_coding	myosin IC [Source:MGI Symbol;Acc:MGI:106612]	0.94009	1	1.50439e-09	1.75984e-05
ENSMUSG00000018334	2.09204e-07	-3.98314	-2.47949	-5.48679	4.66951e-05	5.08241	0.884652	Ksr1	protein_coding	kinase suppressor of ras 1 [Source:MGI Symbol;Acc:MGI:105051]	0.890315	1	8.32354e-08	0.000960536
ENSMUSG00000020053	6.44474e-06	-5.12867	-2.32295	-7.9344	0.000935885	6.133	0.668521	Igf1	protein_coding	insulin-like growth factor 1 [Source:MGI Symbol;Acc:MGI:96432]	0.8	1	1.02346e-08	0.00011906
ENSMUSG00000020121	3.44446e-05	-3.75589	-2.03938	-5.4724	0.00364176	5.49577	1.49692	Srgap1	protein_coding	SLIT-ROBO Rho GTPase activating protein 1 [Source:MGI Symbol;Acc:MGI:2152936]	0.849099	1	1.15261e-06	0.0130867
ENSMUSG00000020357	1.31528e-12	-6.40963	-4.48164	-8.33762	1.13236e-09	7.16978	0.301205	Flt4	protein_coding	FMS-like tyrosine kinase 4 [Source:MGI Symbol;Acc:MGI:95561]	0.943919	1	5.62125e-19	6.74325e-15
ENSMUSG00000020407	1.18954e-06	-5.4167	-2.9255	-7.90791	0.000231251	6.54146	0.773616	Upp1	protein_coding	uridine phosphorylase 1 [Source:MGI Symbol;Acc:MGI:1097668]	0.838063	1	6.2928e-10	7.389e-06
ENSMUSG00000020439	1.81961e-05	-4.30346	-2.42735	-6.17957	0.00219318	6.06379	1.50517	Smtn	protein_coding	smoothelin [Source:MGI Symbol;Acc:MGI:1354727]	0.85473	1	1.38616e-06	0.0157136
ENSMUSG00000020717	2.20522e-12	-5.25786	-3.2704	-7.24532	1.66122e-09	5.77121	0.100333	Pecam1	protein_coding	platelet/endothelial cell adhesion molecule 1 [Source:MGI Symbol;Acc:MGI:97537]	0.909009	1	2.11733e-22	2.54652e-18
ENSMUSG00000021280	1.18862e-07	-4.28044	-2.41532	-6.14557	2.84076e-05	5.12083	0.542515	Exoc3l4	protein_coding	exocyst complex component 3-like 4 [Source:MGI Symbol;Acc:MGI:1921363]	0.871171	1	2.91598e-12	3.46214e-08
ENSMUSG00000021281	2.24444e-07	-4.08781	-2.16185	-6.01376	4.91859e-05	4.76142	0.390087	Tnfaip2	protein_coding	tumor necrosis factor, alpha-induced protein 2 [Source:MGI Symbol;Acc:MGI:104960]	0.847523	1	3.26476e-12	3.87527e-08
ENSMUSG00000021285	4.5758e-06	-3.91735	-2.12389	-5.7108	0.000735361	4.9744	0.829419	Ppp1r13b	protein_coding	protein phosphatase 1, regulatory (inhibitor) subunit 13B [Source:MGI Symbol;Acc:MGI:1336199]	0.850901	1	5.25197e-08	0.000607495
ENSMUSG00000021613	4.82968e-05	-4.98736	-2.48928	-7.48544	0.00489178	9.66589	4.52814	Hapln1	protein_coding	hyaluronan and proteoglycan link protein 1 [Source:MGI Symbol;Acc:MGI:1337006]	0.864189	1	2.18146e-05	0.239306
ENSMUSG00000021701	2.11316e-05	-4.89024	-3.01563	-6.76486	0.00242571	8.60039	3.38079	Plk2	protein_coding	polo-like kinase 2 [Source:MGI Symbol;Acc:MGI:1099790]	0.863063	1	1.65946e-05	0.182939
ENSMUSG00000021998	8.29291e-08	-4.63474	-2.36872	-6.90077	2.12669e-05	5.30437	0.342396	Lcp1	protein_coding	lymphocyte cytosolic protein 1 [Source:MGI Symbol;Acc:MGI:104808]	0.850225	1	3.32969e-13	3.96199e-09
ENSMUSG00000022091	2.88195e-06	-4.90665	-2.98847	-6.82482	0.000503422	6.61574	1.41215	Sorbs3	protein_coding	sorbin and SH3 domain containing 3 [Source:MGI Symbol;Acc:MGI:700013]	0.877252	1	9.35352e-08	0.00107809
ENSMUSG00000022221	2.69603e-05	-4.68569	-2.53803	-6.83336	0.00298122	6.36611	1.41546	Ripk3	protein_coding	receptor-interacting serine-threonine kinase 3 [Source:MGI Symbol;Acc:MGI:2154952]	0.834685	1	1.0893e-06	0.0123755
ENSMUSG00000022799	4.99874e-05	-4.044	-2.11957	-5.96843	0.00502082	5.84345	1.56122	Arhgap31	protein_coding	Rho GTPase activating protein 31 [Source:MGI Symbol;Acc:MGI:1333857]	0.843468	1	4.31896e-06	0.0484199
ENSMUSG00000022895	4.9001e-06	-4.48873	-2.74243	-6.23502	0.000759687	6.3245	1.58091	Ets2	protein_coding	E26 avian leukemia oncogene 2, 3' domain [Source:MGI Symbol;Acc:MGI:95456]	0.873874	1	6.27159e-07	0.00714898
ENSMUSG00000024451	9.81924e-12	-5.13374	-3.57982	-6.68766	5.63578e-09	6.03102	0.618638	Arap3	protein_coding	ArfGAP with RhoGAP domain, ankyrin repeat and PH domain 3 [Source:MGI Symbol;Acc:MGI:2147274]	0.930405	1	2.80529e-10	3.30098e-06
ENSMUSG00000024975	1.70706e-08	3.0778	4.06552	2.09007	4.78494e-06	5.75817	8.79627	Pdcd4	protein_coding	programmed cell death 4 [Source:MGI Symbol;Acc:MGI:107490]	0.787361	3	5.12704e-10	6.02274e-06
ENSMUSG00000024986	3.29526e-10	-6.17708	-4.40017	-7.95398	1.47103e-07	7.51345	0.906457	Hhex	protein_coding	hematopoietically expressed homeobox [Source:MGI Symbol;Acc:MGI:96086]	0.952703	1	9.36729e-12	1.10956e-07
ENSMUSG00000025597	1.47869e-06	-4.31641	-2.02174	-6.61107	0.00027848	5.05384	0.443935	Klhl4	protein_coding	kelch-like 4 [Source:MGI Symbol;Acc:MGI:2442829]	0.803153	1	1.23293e-09	1.44339e-05
ENSMUSG00000026628	2.69917e-11	-5.25353	-3.47549	-7.03158	1.34418e-08	5.95053	0.298456	Atf3	protein_coding	activating transcription factor 3 [Source:MGI Symbol;Acc:MGI:109384]	0.938964	1	7.09474e-20	8.51936e-16
ENSMUSG00000026814	8.79979e-14	-6.23949	-4.7547	-7.72428	1.20713e-10	7.19447	0.537547	Eng	protein_coding	endoglin [Source:MGI Symbol;Acc:MGI:95392]	0.983784	1	6.146e-14	7.32296e-10
ENSMUSG00000026921	6.21574e-10	-6.83374	-5.10302	-8.56447	2.49728e-07	9.73439	2.45461	Egfl7	protein_coding	EGF-like domain 7 [Source:MGI Symbol;Acc:MGI:2449923]	0.957658	1	9.17234e-09	0.000106729
ENSMUSG00000026923	4.94245e-09	-4.0766	-2.78513	-5.36807	1.65476e-06	5.12413	0.745427	Notch1	protein_coding	notch 1 [Source:MGI Symbol;Acc:MGI:97363]	0.931532	1	3.09402e-11	3.65589e-07
ENSMUSG00000027082	0.000114139	-4.60584	-2.23416	-6.97751	0.00968816	7.7513	2.93044	Tfpi	protein_coding	tissue factor pathway inhibitor [Source:MGI Symbol;Acc:MGI:1095418]	0.814865	1	7.75388e-05	0.832766
ENSMUSG00000027217	3.56753e-09	-5.1677	-3.241	-7.09439	1.26469e-06	6.22344	0.763649	Tspan18	protein_coding	tetraspanin 18 [Source:MGI Symbol;Acc:MGI:1917186]	0.885586	1	8.73254e-10	1.02415e-05
ENSMUSG00000027293	3.96736e-05	-4.41107	-2.32315	-6.49899	0.00412229	6.55632	1.92759	Ehd4	protein_coding	EH-domain containing 4 [Source:MGI Symbol;Acc:MGI:1919619]	0.825225	1	1.82746e-05	0.201112
ENSMUSG00000027435	6.76529e-15	-6.27431	-3.24304	-9.30558	2.71807e-11	7.22022	0.735737	Cd93	protein_coding	CD93 antigen [Source:MGI Symbol;Acc:MGI:106664]	0.780631	1	9.26393e-05	0.991519
ENSMUSG00000027562	2.96645e-05	-4.74409	-2.41871	-7.06946	0.00323947	6.36585	1.33444	Car2	protein_coding	carbonic anhydrase 2 [Source:MGI Symbol;Acc:MGI:88269]	0.832432	1	3.82744e-07	0.00437553
ENSMUSG00000027712	8.92309e-05	-4.78994	-2.88161	-6.69827	0.00790808	9.53135	4.39312	Anxa5	protein_coding	annexin A5 [Source:MGI Symbol;Acc:MGI:106008]	0.865315	1	1.68966e-05	0.186166
ENSMUSG00000028717	9.01368e-14	-6.25078	-4.45494	-8.04661	1.20713e-10	6.93425	0.242076	Tal1	protein_coding	T cell acute lymphocytic leukemia 1 [Source:MGI Symbol;Acc:MGI:98480]	0.949324	1	2.10437e-19	2.52608e-15
ENSMUSG00000029121	8.27108e-06	-4.79958	-2.66284	-6.93632	0.00114588	6.25344	1.16971	Crmp1	protein_coding	collapsin response mediator protein 1 [Source:MGI Symbol;Acc:MGI:107793]	0.848198	1	8.38184e-08	0.00096718
ENSMUSG00000029163	6.7098e-05	-3.8982	-2.19723	-5.59917	0.00631822	6.60919	2.41015	Emilin1	protein_coding	elastin microfibril interfacer 1 [Source:MGI Symbol;Acc:MGI:1926189]	0.843243	1	1.97544e-05	0.216982
ENSMUSG00000029171	8.90595e-07	-4.58455	-3.08428	-6.08482	0.000178906	6.63636	1.71898	Pgm1	protein_coding	phosphoglucomutase 1 [Source:MGI Symbol;Acc:MGI:97564]	0.900901	1	1.27263e-07	0.00146378
ENSMUSG00000029287	3.35879e-06	-5.33791	-3.49263	-7.18318	0.000554569	8.43471	2.72959	Tgfbr3	protein_coding	transforming growth factor, beta receptor III [Source:MGI Symbol;Acc:MGI:104637]	0.886036	1	2.23504e-06	0.0252425
ENSMUSG00000029622	1.21638e-06	-3.87104	-2.2915	-5.45059	0.000232715	5.01852	0.915406	Arpc1b	protein_coding	actin related protein 2/3 complex, subunit 1B [Source:MGI Symbol;Acc:MGI:1343142]	0.877703	1	4.5403e-08	0.000525721
ENSMUSG00000029648	5.11331e-10	-6.70801	-4.57031	-8.8457	2.1252e-07	8.08758	1.00049	Flt1	protein_coding	FMS-like tyrosine kinase 1 [Source:MGI Symbol;Acc:MGI:95558]	0.924775	1	3.6893e-10	4.33825e-06
Supplementary Data 2. List of genes that are differentially expressed in Isl1+ CPC clusters
ENSMUSG00000029826	4.56379e-08	-6.90837	-4.43916	-9.37759	1.22239e-05	8.55594	1.24054	Zc3hav1	protein_coding	zinc finger CCCH type, antiviral 1 [Source:MGI Symbol;Acc:MGI:1926031]	0.909685	1	1.17344e-09	1.3741e-05
ENSMUSG00000030123	2.91513e-12	-6.48689	-4.61486	-8.35891	2.06683e-09	7.59144	0.723301	Plxnd1	protein_coding	plexin D1 [Source:MGI Symbol;Acc:MGI:2154244]	0.938739	1	6.85591e-12	8.127e-08
ENSMUSG00000030220	8.68962e-05	-4.6684	-2.12786	-7.20893	0.00781612	6.43304	1.53862	Arhgdib	protein_coding	Rho, GDP dissociation inhibitor (GDI) beta [Source:MGI Symbol;Acc:MGI:101940]	0.798423	1	2.41492e-05	0.264676
ENSMUSG00000030557	1.70386e-05	-4.35194	-2.67325	-6.03064	0.00207441	8.08096	3.45137	Mef2a	protein_coding	myocyte enhancer factor 2A [Source:MGI Symbol;Acc:MGI:99532]	0.880631	1	8.24955e-06	0.0917845
ENSMUSG00000031453	3.25572e-06	-4.21763	-2.30838	-6.12689	0.000552384	5.31782	0.847921	Rasa3	protein_coding	RAS p21 protein activator 3 [Source:MGI Symbol;Acc:MGI:1197013]	0.854955	1	1.66455e-08	0.000193421
ENSMUSG00000031561	6.38428e-05	3.83396	5.24335	2.42456	0.00614793	1.23293	5.19521	Tenm3	protein_coding	teneurin transmembrane protein 3 [Source:MGI Symbol;Acc:MGI:1345183]	0.578477	3	0.0890009	1
ENSMUSG00000031871	2.16409e-13	-6.24864	-4.12797	-8.36932	2.37125e-10	6.87946	0.136715	Cdh5	protein_coding	cadherin 5 [Source:MGI Symbol;Acc:MGI:105057]	0.911261	1	1.24742e-22	1.50052e-18
ENSMUSG00000032035	6.13737e-05	-5.50725	-2.91813	-8.09637	0.00601412	10.1314	4.38213	Ets1	protein_coding	E26 avian leukemia oncogene 1, 5' domain [Source:MGI Symbol;Acc:MGI:95455]	0.853829	1	2.8068e-05	0.306952
ENSMUSG00000032679	2.07332e-05	-4.65887	-2.47502	-6.84272	0.00240286	6.19527	1.27029	Cd59a	protein_coding	CD59a antigen [Source:MGI Symbol;Acc:MGI:109177]	0.838739	1	4.91243e-07	0.00560704
ENSMUSG00000032766	0.000106572	-3.75511	-2.19849	-5.31172	0.00924108	6.70491	2.64339	Gng11	protein_coding	guanine nucleotide binding protein (G protein), gamma 11 [Source:MGI Symbol;Acc:MGI:1913316]	0.80991	1	0.000116711	1
ENSMUSG00000032946	5.32908e-09	-4.92308	-3.37478	-6.47138	1.73599e-06	5.90879	0.633654	Rasgrp2	protein_coding	RAS, guanyl releasing protein 2 [Source:MGI Symbol;Acc:MGI:1333849]	0.919369	1	3.72278e-14	4.44016e-10
ENSMUSG00000033066	1.19261e-05	-4.45814	-2.47863	-6.43766	0.00156244	6.11494	1.40907	Gas7	protein_coding	growth arrest specific 7 [Source:MGI Symbol;Acc:MGI:1202388]	0.86464	1	1.06703e-06	0.0121236
ENSMUSG00000034037	3.66379e-07	-5.0944	-2.72645	-7.46234	7.74732e-05	6.01898	0.603841	Fgd5	protein_coding	FYVE, RhoGEF and PH domain containing 5 [Source:MGI Symbol;Acc:MGI:2443369]	0.843018	1	3.52796e-10	4.14958e-06
ENSMUSG00000034845	4.37459e-10	-5.54594	-3.8895	-7.20238	1.8831e-07	6.56461	0.649578	Plvap	protein_coding	plasmalemma vesicle associated protein [Source:MGI Symbol;Acc:MGI:1890497]	0.931982	1	1.07407e-13	1.279e-09
ENSMUSG00000036644	1.94991e-07	-5.61038	-3.90999	-7.31076	4.4344e-05	8.06002	2.06136	Tbc1d9b	protein_coding	TBC1 domain family, member 9B [Source:MGI Symbol;Acc:MGI:1924045]	0.918919	1	6.97009e-08	0.000805325
ENSMUSG00000037306	1.86227e-08	-3.74792	-2.05947	-5.43637	5.10134e-06	4.53785	0.525993	Man1c1	protein_coding	mannosidase, alpha, class 1C, member 1 [Source:MGI Symbol;Acc:MGI:2446214]	0.906306	1	8.45177e-13	1.00492e-08
ENSMUSG00000037754	5.27859e-06	-4.86358	-2.59814	-7.12901	0.000795286	6.25305	1.15615	Ppp1r16b	protein_coding	protein phosphatase 1, regulatory (inhibitor) subunit 16B [Source:MGI Symbol;Acc:MGI:2151841]	0.844144	1	1.83441e-06	0.0207545
ENSMUSG00000038543	1.96182e-05	-4.11091	-2.11501	-6.10681	0.00231821	5.61095	1.32153	BC028528	protein_coding	cDNA sequence BC028528 [Source:MGI Symbol;Acc:MGI:2385885]	0.82973	1	1.71789e-05	0.189226
ENSMUSG00000038811	1.08703e-11	-5.23754	-3.5194	-6.95567	5.95542e-09	5.89652	0.265877	Gngt2	protein_coding	guanine nucleotide binding protein (G protein), gamma transducing activity polypeptide 2 [Source:MGI Symbol;Acc:MGI:893584]	0.941216	1	4.59835e-20	5.52308e-16
ENSMUSG00000041012	7.62146e-06	-3.75562	-2.0183	-5.49293	0.00109282	5.2455	1.23949	Cmtm8	protein_coding	CKLF-like MARVEL transmembrane domain containing 8 [Source:MGI Symbol;Acc:MGI:2447167]	0.856532	1	1.73485e-07	0.00199282
ENSMUSG00000041361	1.55579e-12	-6.43111	-4.53579	-8.32642	1.25013e-09	7.21959	0.325245	Myzap	protein_coding	myocardial zonula adherens protein [Source:MGI Symbol;Acc:MGI:2142908]	0.94527	1	4.40178e-19	5.28213e-15
ENSMUSG00000041773	2.04632e-05	-6.47414	-4.0406	-8.90768	0.0023946	11.058	4.12911	Enc1	protein_coding	ectodermal-neural cortex 1 [Source:MGI Symbol;Acc:MGI:109610]	0.901802	1	1.32715e-06	0.0150472
ENSMUSG00000042106	9.35354e-08	-5.62997	-3.98338	-7.27657	2.30078e-05	7.63372	1.57773	Fam212a	protein_coding	family with sequence similarity 212, member A [Source:MGI Symbol;Acc:MGI:1915426]	0.912613	1	2.86939e-09	3.35058e-05
ENSMUSG00000042807	1.31693e-08	-3.93326	-2.32957	-5.53695	3.87145e-06	4.56697	0.421265	Hecw2	protein_coding	HECT, C2 and WW domain containing E3 ubiquitin protein ligase 2 [Source:MGI Symbol;Acc:MGI:2685817]	0.881982	1	1.25017e-09	1.46333e-05
ENSMUSG00000043008	1.5849e-08	-5.32653	-3.52291	-7.13015	4.5483e-06	6.4675	0.76935	Klhl6	protein_coding	kelch-like 6 [Source:MGI Symbol;Acc:MGI:2686922]	0.908333	1	1.20385e-12	1.43065e-08
ENSMUSG00000044338	7.80015e-06	-4.94113	-3.03664	-6.84561	0.0010932	7.65018	2.32682	Aplnr	protein_coding	apelin receptor [Source:MGI Symbol;Acc:MGI:1346086]	0.857658	1	2.881e-06	0.0324574
ENSMUSG00000044562	1.17804e-13	-6.35524	-4.5901	-8.12037	1.41989e-10	7.10857	0.305769	Rasip1	protein_coding	Ras interacting protein 1 [Source:MGI Symbol;Acc:MGI:1917153]	0.949099	1	8.61663e-19	1.03322e-14
ENSMUSG00000044629	4.72319e-05	-4.13891	-2.25975	-6.01807	0.00482446	5.73603	1.35198	Cnrip1	protein_coding	cannabinoid receptor interacting protein 1 [Source:MGI Symbol;Acc:MGI:1917505]	0.838288	1	6.03675e-07	0.0068831
ENSMUSG00000045092	4.37103e-09	-4.68394	-2.59283	-6.77505	1.50526e-06	5.27752	0.226899	S1pr1	protein_coding	sphingosine-1-phosphate receptor 1 [Source:MGI Symbol;Acc:MGI:1096355]	0.860811	1	5.86384e-17	7.02254e-13
ENSMUSG00000046470	9.43396e-17	-6.87937	-5.2557	-8.50304	5.68537e-13	7.58467	0.121767	Sox18	protein_coding	SRY (sex determining region Y)-box 18 [Source:MGI Symbol;Acc:MGI:103559]	0.997297	1	2.13755e-29	2.57426e-25
ENSMUSG00000046768	4.60305e-12	-5.75513	-4.02394	-7.48631	3.08225e-09	6.50631	0.363047	Rhoj	protein_coding	ras homolog family member J [Source:MGI Symbol;Acc:MGI:1931551]	0.942342	1	2.34045e-16	2.80129e-12
ENSMUSG00000052921	2.45762e-14	-5.78157	-4.14817	-7.41497	7.07606e-11	6.49246	0.388429	Arhgef15	protein_coding	Rho guanine nucleotide exchange factor (GEF) 15 [Source:MGI Symbol;Acc:MGI:3045246]	0.940991	1	5.35386e-12	6.35021e-08
ENSMUSG00000054690	7.18846e-12	-5.21709	-2.74799	-7.68619	4.56013e-09	5.7733	0.27645	Emcn	protein_coding	endomucin [Source:MGI Symbol;Acc:MGI:1891716]	0.808559	1	3.82818e-08	0.000443418
ENSMUSG00000056492	1.41357e-10	-5.78052	-3.71996	-7.84109	6.55297e-08	6.52854	0.325415	Adgrf5	protein_coding	adhesion G protein-coupled receptor F5 [Source:MGI Symbol;Acc:MGI:2182928]	0.902252	1	1.48887e-17	1.78412e-13
ENSMUSG00000059588	9.50551e-09	-6.65327	-4.72483	-8.5817	2.86425e-06	9.18795	2.11274	Calcrl	protein_coding	calcitonin receptor-like [Source:MGI Symbol;Acc:MGI:1926944]	0.938739	1	3.35868e-08	0.000389171
ENSMUSG00000061119	9.23485e-08	-5.82578	-3.45285	-8.19871	2.30078e-05	7.55635	1.44514	Prcp	protein_coding	prolylcarboxypeptidase (angiotensinase C) [Source:MGI Symbol;Acc:MGI:1919711]	0.867117	1	3.14069e-07	0.00359421
ENSMUSG00000062960	1.29961e-09	-7.31788	-5.32909	-9.30668	5.05298e-07	10.492	2.72353	Kdr	protein_coding	kinase insert domain protein receptor [Source:MGI Symbol;Acc:MGI:96683]	0.966667	1	1.13685e-08	0.000132216
ENSMUSG00000063060	1.00947e-12	-6.17525	-4.14927	-8.20122	9.35935e-10	6.85424	0.208882	Sox7	protein_coding	SRY (sex determining region Y)-box 7 [Source:MGI Symbol;Acc:MGI:98369]	0.943468	1	8.12787e-22	9.77295e-18
ENSMUSG00000064373	1.2407e-05	-5.29443	-2.50476	-8.0841	0.00160797	7.47057	1.93393	Selenop	protein_coding	selenoprotein P [Source:MGI Symbol;Acc:MGI:894288]	0.811937	1	1.84369e-05	0.202825
ENSMUSG00000071042	2.48829e-06	-5.25419	-3.42335	-7.08503	0.000441049	8.23605	2.63145	Rasgrp3	protein_coding	RAS, guanyl releasing protein 3 [Source:MGI Symbol;Acc:MGI:3028579]	0.891441	1	1.9099e-06	0.0216029
ENSMUSG00000073599	1.3441e-09	-6.81853	-4.63337	-9.00368	5.06262e-07	8.1029	0.849076	Ecscr	protein_coding	endothelial cell surface expressed chemotaxis and apoptosis regulator [Source:MGI Symbol;Acc:MGI:1915795]	0.933333	1	8.74596e-13	1.03981e-08
ENSMUSG00000098557	6.21048e-08	-5.16137	-2.98509	-7.33766	1.62728e-05	6.84222	1.46626	Kctd12	protein_coding	potassium channel tetramerisation domain containing 12 [Source:MGI Symbol;Acc:MGI:2145823]	0.854505	1	4.09624e-06	0.0459353

## Sheet: Isl1_cluster 2
geneID	pval	lfc	lfc.hi	lfc.lo	fdr.x	basemeanA	basemeanB	symbol	biotype	description	auroc	clusts	marker_pval	marker_fdr
ENSMUSG00000000594	2.90866e-11	-4.85574	-3.78954	-5.92194	3.54123e-09	9.00618	3.95573	Gm2a	protein_coding	GM2 ganglioside activator protein [Source:MGI Symbol;Acc:MGI:95762]	0.882594	2	2.08853e-11	2.47052e-07
ENSMUSG00000000631	1.26752e-07	-3.54385	-2.3349	-4.7528	7.71586e-06	5.59072	1.95946	Myo18a	protein_coding	myosin XVIIIA [Source:MGI Symbol;Acc:MGI:2667185]	0.801724	2	3.33229e-08	0.000386146
ENSMUSG00000001270	2.08512e-10	-5.38478	-3.79211	-6.97745	2.24392e-08	7.80665	2.30907	Ckb	protein_coding	creatine kinase, brain [Source:MGI Symbol;Acc:MGI:88407]	0.837028	2	4.84402e-10	5.69124e-06
ENSMUSG00000001349	6.89122e-23	-7.35739	-5.96304	-8.75173	5.53732e-20	8.07689	0.52754	Cnn1	protein_coding	calponin 1 [Source:MGI Symbol;Acc:MGI:104979]	0.92734	2	2.85646e-21	3.43403e-17
ENSMUSG00000001552	1.55847e-06	-3.33897	-2.12861	-4.54933	7.39539e-05	5.75259	2.33417	Jup	protein_coding	junction plakoglobin [Source:MGI Symbol;Acc:MGI:96650]	0.786741	2	1.7207e-07	0.00197674
ENSMUSG00000001663	2.07653e-09	-3.93844	-2.33145	-5.54542	1.85395e-07	4.52335	0.453723	Gstt1	protein_coding	glutathione S-transferase, theta 1 [Source:MGI Symbol;Acc:MGI:107379]	0.761289	2	7.0135e-13	8.33975e-09
ENSMUSG00000002100	2.39226e-26	-7.56815	-6.38564	-8.75065	2.62126e-23	8.24381	0.463509	Mybpc3	protein_coding	myosin binding protein C, cardiac [Source:MGI Symbol;Acc:MGI:102844]	0.966338	2	2.60425e-23	3.13318e-19
ENSMUSG00000003848	2.13517e-06	3.40489	4.72465	2.08512	9.63864e-05	2.43446	5.92049	Nob1	protein_coding	NIN1/RPN12 binding protein 1 homolog [Source:MGI Symbol;Acc:MGI:1914869]	0.722844	5	4.11513e-05	0.446821
ENSMUSG00000004085	5.1942e-06	-3.8047	-2.11459	-5.4948	0.000212945	7.40635	3.54458	Map3k20	protein_coding	mitogen-activated protein kinase kinase kinase 20 [Source:MGI Symbol;Acc:MGI:2443258]	0.76642	2	2.89891e-06	0.0326533
ENSMUSG00000004665	1.47307e-10	-3.71208	-2.69176	-4.7324	1.64397e-08	11.4767	7.63146	Cnn2	protein_coding	calponin 2 [Source:MGI Symbol;Acc:MGI:105093]	0.939039	2	4.58851e-14	5.47042e-10
ENSMUSG00000005583	2.02308e-13	-5.9488	-4.65426	-7.24334	4.06404e-11	9.38633	3.23935	Mef2c	protein_coding	myocyte enhancer factor 2C [Source:MGI Symbol;Acc:MGI:99458]	0.916256	2	3.1154e-13	3.70732e-09
ENSMUSG00000006221	2.37966e-14	-3.54729	-2.17581	-4.91878	5.21491e-12	3.76001	0.0572701	Hspb7	protein_coding	heat shock protein family, member 7 (cardiovascular) [Source:MGI Symbol;Acc:MGI:1352494]	0.787151	2	4.91158e-21	5.90372e-17
ENSMUSG00000006356	1.22298e-10	-5.64191	-4.15436	-7.12945	1.41736e-08	10.4251	4.6358	Crip2	protein_coding	cysteine rich protein 2 [Source:MGI Symbol;Acc:MGI:1915587]	0.864414	1	1.96758e-05	0.216178
ENSMUSG00000006360	8.23131e-15	-5.47406	-4.10119	-6.84693	1.94533e-12	7.13067	1.54186	Crip1	protein_coding	cysteine-rich protein 1 (intestinal) [Source:MGI Symbol;Acc:MGI:88501]	0.8633	2	4.92e-12	5.8361e-08
ENSMUSG00000006498	1.06756e-06	3.51303	4.94145	2.08462	5.33911e-05	4.73824	8.36089	Ptbp1	protein_coding	polypyrimidine tract binding protein 1 [Source:MGI Symbol;Acc:MGI:97791]	0.66982	1	0.0491114	1
ENSMUSG00000006585	6.27315e-06	3.13334	4.22257	2.0441	0.000244694	1.84364	5.00673	Cdt1	protein_coding	chromatin licensing and DNA replication factor 1 [Source:MGI Symbol;Acc:MGI:1914427]	0.623005	4	0.00405703	1
ENSMUSG00000007122	2.94433e-13	-5.10239	-3.40697	-6.79781	5.72387e-11	5.74148	0.502062	Casq1	protein_coding	calsequestrin 1 [Source:MGI Symbol;Acc:MGI:1309468]	0.801724	2	5.22475e-14	6.22686e-10
ENSMUSG00000008999	2.06135e-06	-3.66163	-2.2066	-5.11665	9.34039e-05	6.52085	2.78695	Bmp7	protein_coding	bone morphogenetic protein 7 [Source:MGI Symbol;Acc:MGI:103302]	0.760365	2	2.78711e-06	0.0314163
ENSMUSG00000015579	7.14811e-21	-4.23313	-3.29948	-5.16678	3.3137e-18	4.57282	0.215418	Nkx2-5	protein_coding	NK2 homeobox 5 [Source:MGI Symbol;Acc:MGI:97350]	0.900041	2	1.87562e-23	2.25675e-19
ENSMUSG00000018339	2.25655e-09	-3.04855	-2.14593	-3.95116	1.9567e-07	11.2137	8.03409	Gpx3	protein_coding	glutathione peroxidase 3 [Source:MGI Symbol;Acc:MGI:105102]	0.870895	2	1.86506e-10	2.19629e-06
ENSMUSG00000018340	1.70391e-08	-4.75344	-3.4016	-6.10527	1.29165e-06	8.32636	3.42168	Anxa6	protein_coding	annexin A6 [Source:MGI Symbol;Acc:MGI:88255]	0.839594	2	1.54743e-09	1.81002e-05
ENSMUSG00000018427	4.23506e-07	-3.61898	-2.16939	-5.06857	2.34152e-05	4.99774	1.29733	Ypel2	protein_coding	yippee-like 2 (Drosophila) [Source:MGI Symbol;Acc:MGI:1925114]	0.765599	2	5.64337e-08	0.000652599
ENSMUSG00000018845	1.13724e-26	-8.22527	-7.0939	-9.35665	1.37071e-23	9.15384	0.648875	Unc45b	protein_coding	unc-45 myosin chaperone B [Source:MGI Symbol;Acc:MGI:2443377]	0.984195	2	1.42817e-25	1.71908e-21
ENSMUSG00000018973	1.11972e-06	2.817	3.56546	2.06854	5.5539e-05	0.152447	3.05721	Hoxb1	protein_coding	homeobox B1 [Source:MGI Symbol;Acc:MGI:96182]	0.741564	4	6.31672e-10	7.41646e-06
ENSMUSG00000019528	7.7484e-14	-4.56944	-3.4994	-5.63948	1.6102e-11	12.3178	7.58904	Gyg	protein_coding	glycogenin [Source:MGI Symbol;Acc:MGI:1351614]	0.939245	2	4.43159e-14	5.28379e-10
ENSMUSG00000019817	3.62411e-05	-3.79636	-2.2572	-5.33552	0.00109752	8.85864	4.94667	Plagl1	protein_coding	pleiomorphic adenoma gene-like 1 [Source:MGI Symbol;Acc:MGI:1100874]	0.751745	2	1.34981e-05	0.149262
ENSMUSG00000020155	9.48215e-15	-4.46356	-3.05758	-5.86954	2.19785e-12	4.84514	0.236667	Kcnmb1	protein_coding	potassium large conductance calcium-activated channel, subfamily M, beta member 1 [Source:MGI Symbol;Acc:MGI:1334203]	0.827176	2	2.46815e-19	2.96227e-15
ENSMUSG00000020186	1.40647e-10	-2.97711	-2.14076	-3.81347	1.59926e-08	11.0273	7.93649	Csrp2	protein_coding	cysteine and glycine-rich protein 2 [Source:MGI Symbol;Acc:MGI:1202907]	0.918924	2	6.15234e-13	7.31697e-09
ENSMUSG00000020469	3.12384e-28	-8.8078	-7.54205	-10.0736	4.70646e-25	13.2351	4.19361	Myl7	protein_coding	myosin, light polypeptide 7, regulatory [Source:MGI Symbol;Acc:MGI:107495]	0.980296	2	1.11691e-16	1.33738e-12
ENSMUSG00000020475	3.70337e-18	-6.33948	-4.6187	-8.06025	1.31285e-15	6.87909	0.357346	Pgam2	protein_coding	phosphoglycerate mutase 2 [Source:MGI Symbol;Acc:MGI:1933118]	0.845649	2	5.01915e-19	6.02248e-15
ENSMUSG00000020542	1.05501e-22	-7.69573	-6.52603	-8.86544	7.94755e-20	9.13661	1.18993	Myocd	protein_coding	myocardin [Source:MGI Symbol;Acc:MGI:2137495]	0.967365	2	3.74975e-20	4.5042e-16
ENSMUSG00000020592	6.00139e-06	3.44289	4.68073	2.20505	0.000239488	2.02973	5.54656	Sdc1	protein_coding	syndecan 1 [Source:MGI Symbol;Acc:MGI:1349162]	0.658427	5	0.00334712	1
ENSMUSG00000020649	8.12574e-22	3.9865	4.74413	3.22887	5.15472e-19	7.08511	11.1874	Rrm2	protein_coding	ribonucleotide reductase M2 [Source:MGI Symbol;Acc:MGI:98181]	0.653458	3	0.000905361	1
ENSMUSG00000021057	3.48356e-06	-4.09189	-2.58235	-5.60143	0.000149421	7.77611	3.5769	Akap5	protein_coding	A kinase (PRKA) anchor protein 5 [Source:MGI Symbol;Acc:MGI:2685104]	0.784483	2	5.5808e-07	0.00636657
ENSMUSG00000021200	1.14496e-19	-5.34538	-3.82526	-6.8655	4.60006e-17	5.6041	0.0841272	Asb2	protein_coding	ankyrin repeat and SOCS box-containing 2 [Source:MGI Symbol;Acc:MGI:1929743]	0.837952	2	2.70896e-22	3.2578e-18
ENSMUSG00000021313	2.052e-15	-5.70596	-4.42153	-6.9904	5.49616e-13	6.99735	1.13963	Ryr2	protein_coding	ryanodine receptor 2, cardiac [Source:MGI Symbol;Acc:MGI:99685]	0.901888	2	1.23109e-15	1.47177e-11
ENSMUSG00000021318	3.43439e-06	3.24704	4.46869	2.02538	0.000147838	3.73915	7.02254	Gli3	protein_coding	GLI-Kruppel family member GLI3 [Source:MGI Symbol;Acc:MGI:95729]	0.593111	3	0.0440315	1
ENSMUSG00000021373	1.47537e-09	-4.44302	-3.14129	-5.74475	1.34717e-07	6.28157	1.72571	Cap2	protein_coding	CAP, adenylate cyclase-associated protein, 2 (yeast) [Source:MGI Symbol;Acc:MGI:1914502]	0.827586	2	1.84959e-10	2.17827e-06
ENSMUSG00000021493	1.42477e-10	-3.48221	-2.54541	-4.41901	1.60493e-08	9.77606	6.16406	Pdlim7	protein_coding	PDZ and LIM domain 7 [Source:MGI Symbol;Acc:MGI:1914649]	0.8867	2	3.03502e-11	3.58649e-07
ENSMUSG00000021798	2.33204e-20	-6.38886	-4.97916	-7.79855	1.00386e-17	6.95031	0.396795	Ldb3	protein_coding	LIM domain binding 3 [Source:MGI Symbol;Acc:MGI:1344412]	0.90702	2	1.64461e-20	1.97599e-16
ENSMUSG00000021990	8.95932e-08	-4.06927	-2.77985	-5.3587	5.68351e-06	7.09657	2.92577	Spata13	protein_coding	spermatogenesis associated 13 [Source:MGI Symbol;Acc:MGI:104838]	0.812911	2	1.78164e-08	0.000206938
ENSMUSG00000022215	1.63758e-10	-3.42243	-2.0373	-4.80757	1.79434e-08	3.81758	0.274808	Fitm1	protein_coding	fat storage-inducing transmembrane protein 1 [Source:MGI Symbol;Acc:MGI:1915930]	0.768268	2	1.2784e-14	1.52552e-10
ENSMUSG00000022358	1.60199e-11	-4.18617	-2.58232	-5.79001	2.03251e-09	5.2281	0.982549	Fbxo32	protein_coding	F-box protein 32 [Source:MGI Symbol;Acc:MGI:1914981]	0.743842	2	1.76773e-06	0.0200089
ENSMUSG00000022483	1.87523e-06	-3.84423	-2.41326	-5.27521	8.69315e-05	6.84353	2.91521	Col2a1	protein_coding	collagen, type II, alpha 1 [Source:MGI Symbol;Acc:MGI:88452]	0.780275	2	7.09352e-07	0.00808164
ENSMUSG00000022500	3.52688e-06	3.45495	4.76299	2.14691	0.00015021	3.68591	7.20631	Litaf	protein_coding	LPS-induced TN factor [Source:MGI Symbol;Acc:MGI:1929512]	0.832432	1	0.000114845	1
ENSMUSG00000022803	1.53261e-17	-6.74461	-5.57339	-7.91583	4.99257e-15	9.03202	2.0575	Popdc2	protein_coding	popeye domain containing 2 [Source:MGI Symbol;Acc:MGI:1930150]	0.939245	2	3.61247e-16	4.32268e-12
ENSMUSG00000023345	7.82178e-06	2.82177	3.57904	2.0645	0.000298341	0.366251	3.22675	Poc1a	protein_coding	POC1 centriolar protein A [Source:MGI Symbol;Acc:MGI:1917485]	0.56956	5	0.170085	1
ENSMUSG00000023904	2.72729e-12	-4.23013	-2.89366	-5.56659	4.00879e-10	7.1221	2.82527	Hcfc1r1	protein_coding	host cell factor C1 regulator 1 (XPO1-dependent) [Source:MGI Symbol;Acc:MGI:2663619]	0.838259	2	2.75454e-09	3.21703e-05
ENSMUSG00000024042	8.62612e-13	-3.05919	-2.3349	-3.78348	1.46438e-10	6.20442	3.05084	Sik1	protein_coding	salt inducible kinase 1 [Source:MGI Symbol;Acc:MGI:104754]	0.864122	2	3.81266e-10	4.48178e-06
ENSMUSG00000024049	2.20598e-21	-6.1308	-4.86956	-7.39204	1.15603e-18	6.66786	0.362552	Myom1	protein_coding	myomesin 1 [Source:MGI Symbol;Acc:MGI:1341430]	0.92929	2	1.12748e-23	1.3567e-19
ENSMUSG00000024236	2.42907e-06	-3.46726	-2.13327	-4.80124	0.000108435	6.18851	2.64984	Svil	protein_coding	supervillin [Source:MGI Symbol;Acc:MGI:2147319]	0.774015	2	1.02782e-06	0.0116811
ENSMUSG00000024613	2.7368e-10	3.18584	4.29537	2.0763	2.79548e-08	4.23884	7.56641	Tcof1	protein_coding	treacle ribosome biogenesis factor 1 [Source:MGI Symbol;Acc:MGI:892003]	0.690606	4	1.11411e-05	0.123544
ENSMUSG00000024803	4.13113e-19	-6.91038	-5.1248	-8.69596	1.60621e-16	8.05194	1.02104	Ankrd1	protein_coding	ankyrin repeat domain 1 (cardiac muscle) [Source:MGI Symbol;Acc:MGI:1097717]	0.841954	2	2.05996e-11	2.43693e-07
ENSMUSG00000025491	0.000164037	3.60378	5.20752	2.00004	0.00376598	2.9957	6.6831	Ifitm1	protein_coding	interferon induced transmembrane protein 1 [Source:MGI Symbol;Acc:MGI:1915963]	0.804764	5	1.54607e-08	0.0001797
ENSMUSG00000025574	2.49774e-08	4.29849	5.52339	3.07359	1.79198e-06	2.22046	6.59583	Tk1	protein_coding	thymidine kinase 1 [Source:MGI Symbol;Acc:MGI:98763]	0.624191	3	0.00698765	1
ENSMUSG00000025791	3.49686e-05	-3.4604	-2.13856	-4.78224	0.00106703	8.09586	4.53097	Pgm2	protein_coding	phosphoglucomutase 2 [Source:MGI Symbol;Acc:MGI:97565]	0.783046	2	7.51734e-07	0.0085615
ENSMUSG00000025813	2.76337e-08	-4.01871	-2.7432	-5.29423	1.95923e-06	6.19176	2.07105	Homer2	protein_coding	homer scaffolding protein 2 [Source:MGI Symbol;Acc:MGI:1347354]	0.818042	2	3.93001e-09	4.58515e-05
ENSMUSG00000026163	2.3286e-14	-5.04245	-3.67173	-6.41317	5.19753e-12	5.83884	0.674341	Sphkap	protein_coding	SPHK1 interactor, AKAP domain containing [Source:MGI Symbol;Acc:MGI:1924879]	0.865969	2	2.7956e-15	3.34047e-11
ENSMUSG00000026185	3.69614e-07	-3.7884	-2.62767	-4.94913	2.06248e-05	9.8626	5.89832	Igfbp5	protein_coding	insulin-like growth factor binding protein 5 [Source:MGI Symbol;Acc:MGI:96440]	0.80665	2	1.25646e-07	0.00144543
ENSMUSG00000026208	6.25186e-10	-4.60692	-2.95925	-6.2546	5.98045e-08	6.64441	1.9564	Des	protein_coding	desmin [Source:MGI Symbol;Acc:MGI:94885]	0.787767	2	5.8378e-08	0.000674966
ENSMUSG00000026355	2.80376e-08	3.11397	4.20782	2.02012	1.97624e-06	5.93412	9.11242	Mcm6	protein_coding	minichromosome maintenance complex component 6 [Source:MGI Symbol;Acc:MGI:1298227]	0.599099	1	0.251423	1
ENSMUSG00000026414	5.01181e-29	-9.17292	-8.01007	-10.3358	1.11158e-25	11.477	2.03384	Tnnt2	protein_coding	troponin T2, cardiac [Source:MGI Symbol;Acc:MGI:104597]	0.988916	2	6.7122e-19	8.05129e-15
ENSMUSG00000026418	4.43646e-20	-8.32467	-6.93587	-9.71347	1.84388e-17	12.8873	4.29825	Tnni1	protein_coding	troponin I, skeletal, slow 1 [Source:MGI Symbol;Acc:MGI:105073]	0.987685	2	1.70871e-17	2.04721e-13
ENSMUSG00000026430	4.62089e-13	-4.34211	-2.85533	-5.82889	8.70244e-11	4.76003	0.282853	Rassf5	protein_coding	Ras association (RalGDS/AF-6) domain family member 5 [Source:MGI Symbol;Acc:MGI:1926375]	0.805829	2	1.14327e-16	1.36883e-12
ENSMUSG00000026576	1.23087e-12	-5.13903	-3.74183	-6.53622	1.9781e-10	6.34561	1.07912	Atp1b1	protein_coding	ATPase, Na+/K+ transporting, beta 1 polypeptide [Source:MGI Symbol;Acc:MGI:88108]	0.852525	2	1.43642e-13	1.70991e-09
ENSMUSG00000026669	4.58544e-07	3.56789	4.80272	2.33305	2.50083e-05	2.52639	6.16507	Mcm10	protein_coding	minichromosome maintenance 10 replication initiation factor [Source:MGI Symbol;Acc:MGI:1917274]	0.580296	5	0.140878	1
ENSMUSG00000026817	5.21643e-08	-4.63414	-3.13861	-6.12966	3.4546e-06	8.41338	3.66983	Ak1	protein_coding	adenylate kinase 1 [Source:MGI Symbol;Acc:MGI:87977]	0.810653	2	3.30421e-08	0.000382958
ENSMUSG00000027247	8.22002e-09	-3.91702	-2.76589	-5.06814	6.73986e-07	9.73872	5.6802	Arhgap1	protein_coding	Rho GTPase activating protein 1 [Source:MGI Symbol;Acc:MGI:2445003]	0.862274	2	4.75026e-10	5.58155e-06
ENSMUSG00000027276	1.05945e-06	-3.69063	-2.42803	-4.95323	5.32062e-05	10.4926	6.64823	Jag1	protein_coding	jagged 1 [Source:MGI Symbol;Acc:MGI:1095416]	0.808087	2	1.18723e-07	0.00136697
ENSMUSG00000027777	1.92292e-09	-3.23391	-2.33248	-4.13534	1.72962e-07	8.90918	5.5428	Schip1	protein_coding	schwannomin interacting protein 1 [Source:MGI Symbol;Acc:MGI:1353557]	0.853038	2	1.28805e-09	1.50727e-05
ENSMUSG00000027858	7.4051e-08	-3.82027	-2.61308	-5.02746	4.77293e-06	6.3593	2.42969	Tspan2	protein_coding	tetraspanin 2 [Source:MGI Symbol;Acc:MGI:1917997]	0.806034	2	2.73794e-08	0.000317518
ENSMUSG00000027961	2.52716e-15	-4.54971	-3.32615	-5.77326	6.6217e-13	5.23174	0.57672	Lrrc39	protein_coding	leucine rich repeat containing 39 [Source:MGI Symbol;Acc:MGI:1924557]	0.855706	2	1.10816e-14	1.32258e-10
ENSMUSG00000027996	1.1943e-07	2.97764	3.75808	2.19719	7.30704e-06	0.72953	3.76172	Sfrp2	protein_coding	secreted frizzled-related protein 2 [Source:MGI Symbol;Acc:MGI:108078]	0.622549	4	0.00388906	1
ENSMUSG00000028273	8.36389e-12	-5.19031	-3.81539	-6.56522	1.14557e-09	8.88002	3.57319	Pdlim5	protein_coding	PDZ and LIM domain 5 [Source:MGI Symbol;Acc:MGI:1927489]	0.876847	2	3.81367e-11	4.50508e-07
ENSMUSG00000028278	6.11315e-06	-3.48626	-2.22983	-4.74269	0.000240006	9.1732	5.57311	Rragd	protein_coding	Ras-related GTP binding D [Source:MGI Symbol;Acc:MGI:1098604]	0.790538	2	5.3023e-07	0.00604993
ENSMUSG00000028328	2.20872e-12	-4.11252	-2.7849	-5.44015	3.36984e-10	8.17683	3.99901	Tmod1	protein_coding	tropomodulin 1 [Source:MGI Symbol;Acc:MGI:98775]	0.847906	2	1.64978e-09	1.92941e-05
ENSMUSG00000028464	6.60306e-07	-3.32865	-2.03234	-4.62495	3.4754e-05	7.33001	3.93668	Tpm2	protein_coding	tropomyosin 2, beta [Source:MGI Symbol;Acc:MGI:98810]	0.789614	2	4.90905e-07	0.00560368
ENSMUSG00000028518	1.51103e-12	-4.5467	-3.11263	-5.98077	2.39637e-10	5.25186	0.575644	Prkaa2	protein_coding	protein kinase, AMP-activated, alpha 2 catalytic subunit [Source:MGI Symbol;Acc:MGI:1336173]	0.838054	2	5.12825e-16	6.13544e-12
ENSMUSG00000028773	1.54502e-11	-4.45458	-2.99983	-5.90933	1.98108e-09	5.35462	0.799449	Fabp3	protein_coding	fatty acid binding protein 3, muscle and heart [Source:MGI Symbol;Acc:MGI:95476]	0.812808	2	1.08961e-11	1.29043e-07
ENSMUSG00000028949	3.69953e-08	-3.76933	-2.52246	-5.01619	2.54803e-06	5.73578	1.87433	Smarcd3	protein_coding	SWI/SNF related, matrix associated, actin dependent regulator of chromatin, subfamily d, member 3 [Source:MGI Symbol;Acc:MGI:1914243]	0.813321	2	7.79057e-09	9.06744e-05
ENSMUSG00000028977	8.40649e-13	-4.28982	-2.97871	-5.60094	1.46438e-10	4.97919	0.579802	Casz1	protein_coding	castor zinc finger 1 [Source:MGI Symbol;Acc:MGI:1196251]	0.849754	2	3.88471e-15	4.64146e-11
ENSMUSG00000029167	2.76601e-11	-3.45235	-2.03066	-4.87405	3.40191e-09	3.74446	0.161055	Ppargc1a	protein_coding	peroxisome proliferative activated receptor, gamma, coactivator 1 alpha [Source:MGI Symbol;Acc:MGI:1342774]	0.761186	2	8.60522e-16	1.0291e-11
ENSMUSG00000029651	7.41439e-10	-4.01621	-2.35301	-5.67941	6.92757e-08	4.56768	0.43655	Mtus2	protein_coding	microtubule associated tumor suppressor candidate 2 [Source:MGI Symbol;Acc:MGI:1915388]	0.745177	2	9.51299e-11	1.12206e-06
ENSMUSG00000029730	2.94809e-11	3.12205	4.05208	2.19203	3.55333e-09	6.44895	9.70995	Mcm7	protein_coding	minichromosome maintenance complex component 7 [Source:MGI Symbol;Acc:MGI:1298398]	0.638047	3	0.00283563	1
ENSMUSG00000030470	2.70337e-24	-7.13736	-5.72138	-8.55335	2.50644e-21	7.74138	0.433968	Csrp3	protein_coding	cysteine and glycine-rich protein 3 [Source:MGI Symbol;Acc:MGI:1330824]	0.911535	2	1.35173e-19	1.62302e-15
ENSMUSG00000030782	4.8583e-13	-5.61154	-4.24101	-6.98206	9.00878e-11	7.27562	1.52124	Tgfb1i1	protein_coding	transforming growth factor beta 1 induced transcript 1 [Source:MGI Symbol;Acc:MGI:102784]	0.884134	2	4.11992e-14	4.91342e-10
ENSMUSG00000031403	4.55844e-09	3.14537	4.18136	2.10938	3.81548e-07	6.30744	9.58899	Dkc1	protein_coding	dyskeratosis congenita 1, dyskerin [Source:MGI Symbol;Acc:MGI:1861727]	0.687301	4	1.57935e-05	0.174297
ENSMUSG00000031626	4.5875e-11	-4.95263	-3.5105	-6.39476	5.47457e-09	6.40836	1.33856	Sorbs2	protein_coding	sorbin and SH3 domain containing 2 [Source:MGI Symbol;Acc:MGI:1924574]	0.841236	2	5.94113e-12	7.04499e-08
ENSMUSG00000031698	1.93994e-16	-5.70193	-4.29038	-7.11348	5.70294e-14	6.48249	0.635841	Mylk3	protein_coding	myosin light chain kinase 3 [Source:MGI Symbol;Acc:MGI:2443063]	0.878592	2	3.01143e-17	3.60739e-13
ENSMUSG00000031740	6.26516e-07	3.829	4.9224	2.7356	3.31202e-05	1.46189	5.3352	Mmp2	protein_coding	matrix metallopeptidase 2 [Source:MGI Symbol;Acc:MGI:97009]	0.707658	1	0.0147255	1
ENSMUSG00000031880	4.69963e-18	-4.40933	-2.85262	-5.96605	1.61842e-15	4.61958	0.0354794	Rrad	protein_coding	Ras-related associated with diabetes [Source:MGI Symbol;Acc:MGI:1930943]	0.770525	2	7.58347e-19	9.09562e-15
ENSMUSG00000031928	1.53228e-05	3.17921	4.34319	2.01523	0.000540016	2.00084	5.23077	Mre11a	protein_coding	MRE11A homolog A, double strand break repair nuclease [Source:MGI Symbol;Acc:MGI:1100512]	0.672973	1	0.0436428	1
ENSMUSG00000031965	1.35706e-08	-4.8373	-3.28064	-6.39396	1.06212e-06	7.00597	2.04511	Tbx20	protein_coding	T-box 20 [Source:MGI Symbol;Acc:MGI:1888496]	0.811987	2	1.6636e-09	1.94541e-05
ENSMUSG00000031972	2.15215e-12	-4.98815	-3.41463	-6.56168	3.32562e-10	5.69781	0.610636	Acta1	protein_coding	actin, alpha 1, skeletal muscle [Source:MGI Symbol;Acc:MGI:87902]	0.844725	2	3.61581e-12	4.29052e-08
ENSMUSG00000032035	3.40578e-06	3.52906	4.77959	2.27852	0.000147132	1.70824	5.25435	Ets1	protein_coding	E26 avian leukemia oncogene 1, 5' domain [Source:MGI Symbol;Acc:MGI:95455]	0.853829	1	2.8068e-05	0.306952
ENSMUSG00000032060	4.30854e-19	-6.77286	-5.30258	-8.24313	1.62284e-16	7.50605	0.535402	Cryab	protein_coding	crystallin, alpha B [Source:MGI Symbol;Acc:MGI:88516]	0.907635	2	3.33183e-22	4.00652e-18
ENSMUSG00000032085	1.11976e-21	-7.57028	-6.32367	-8.81688	6.74824e-19	9.78618	2.00341	Tagln	protein_coding	transgelin [Source:MGI Symbol;Acc:MGI:106012]	0.953407	2	9.52327e-16	1.1387e-11
ENSMUSG00000032366	1.6875e-21	-3.70759	-3.05464	-4.36053	9.24519e-19	13.2919	9.58282	Tpm1	protein_coding	tropomyosin 1, alpha [Source:MGI Symbol;Acc:MGI:98809]	0.980296	2	1.56555e-16	1.87412e-12
ENSMUSG00000032609	8.14554e-13	-4.42793	-3.02635	-5.82951	1.4438e-10	5.14239	0.616043	Klhdc8b	protein_coding	kelch domain containing 8B [Source:MGI Symbol;Acc:MGI:1925517]	0.816092	2	3.51815e-12	4.17534e-08
ENSMUSG00000032845	7.19791e-16	-3.98345	-2.63367	-5.33323	2.01759e-13	4.18956	0.0734571	Alpk2	protein_coding	alpha-kinase 2 [Source:MGI Symbol;Acc:MGI:2449492]	0.816092	2	2.67847e-20	3.21765e-16
ENSMUSG00000033060	1.25984e-15	-5.10092	-3.81849	-6.38336	3.45111e-13	5.82946	0.588582	Lmo7	protein_coding	LIM domain only 7 [Source:MGI Symbol;Acc:MGI:1353586]	0.875924	2	5.58012e-18	6.6889e-14
ENSMUSG00000033350	4.74569e-05	2.99071	3.94961	2.03182	0.001375	0.639953	3.66803	Chst2	protein_coding	carbohydrate sulfotransferase 2 [Source:MGI Symbol;Acc:MGI:1891160]	0.713063	1	0.00905747	1
ENSMUSG00000033910	2.11997e-09	-4.42655	-3.02458	-5.82853	1.85442e-07	6.19754	1.66777	Gucy1a3	protein_coding	guanylate cyclase 1, soluble, alpha 3 [Source:MGI Symbol;Acc:MGI:1926562]	0.828202	2	9.34476e-10	1.09558e-05
ENSMUSG00000035458	6.84797e-10	-3.97132	-2.18233	-5.76031	6.44833e-08	4.43738	0.34362	Tnni3	protein_coding	troponin I, cardiac 3 [Source:MGI Symbol;Acc:MGI:98783]	0.715928	2	1.00918e-09	1.18245e-05
ENSMUSG00000035783	2.83609e-33	-10.0135	-8.76329	-11.2637	1.70917e-29	12.9032	2.63504	Acta2	protein_coding	actin, alpha 2, smooth muscle, aorta [Source:MGI Symbol;Acc:MGI:87909]	0.988916	2	1.50152e-17	1.79913e-13
ENSMUSG00000035873	1.94185e-07	-3.44676	-2.14728	-4.74625	1.13617e-05	4.81679	1.28774	Pawr	protein_coding	PRKC, apoptosis, WT1, regulator [Source:MGI Symbol;Acc:MGI:2149961]	0.779249	2	1.33077e-08	0.000154715
ENSMUSG00000036242	2.37212e-12	-6.06311	-4.64823	-7.47798	3.57389e-10	10.2487	3.98686	3632451O06Rik	protein_coding	RIKEN cDNA 3632451O06 gene [Source:MGI Symbol;Acc:MGI:1914669]	0.893268	2	9.17241e-12	1.08675e-07
ENSMUSG00000038086	1.00242e-20	-6.11181	-4.66495	-7.55867	4.47487e-18	6.56533	0.286761	Hspb2	protein_coding	heat shock protein 2 [Source:MGI Symbol;Acc:MGI:1916503]	0.881568	2	4.46548e-21	5.36795e-17
ENSMUSG00000038132	1.35377e-17	-6.52775	-5.26127	-7.79424	4.53248e-15	9.39994	2.70861	Rbm24	protein_coding	RNA binding motif protein 24 [Source:MGI Symbol;Acc:MGI:3610364]	0.938834	2	6.47037e-15	7.72821e-11
ENSMUSG00000038235	3.44884e-05	-3.67003	-2.09579	-5.24427	0.00105916	6.73294	2.98167	F11r	protein_coding	F11 receptor [Source:MGI Symbol;Acc:MGI:1321398]	0.791441	1	0.000355655	1
ENSMUSG00000038239	8.02557e-15	-3.75823	-2.4593	-5.05716	1.93464e-12	4.12071	0.232284	Hrc	protein_coding	histidine rich calcium binding protein [Source:MGI Symbol;Acc:MGI:96226]	0.840722	2	7.78404e-21	9.35564e-17
ENSMUSG00000038299	4.93719e-08	3.15271	4.21246	2.09296	3.306e-06	4.05718	7.28604	Wdr36	protein_coding	WD repeat domain 36 [Source:MGI Symbol;Acc:MGI:1917819]	0.640541	1	0.103611	1
ENSMUSG00000038695	7.55368e-07	-3.20559	-2.17749	-4.23369	3.90749e-05	7.50729	4.1956	Josd2	protein_coding	Josephin domain containing 2 [Source:MGI Symbol;Acc:MGI:1913374]	0.799158	2	2.14023e-07	0.00245441
ENSMUSG00000038729	4.06389e-08	-3.73364	-2.62944	-4.83784	2.78307e-06	7.61441	3.72977	Akap2	protein_coding	A kinase (PRKA) anchor protein 2 [Source:MGI Symbol;Acc:MGI:1306795]	0.817939	2	3.53864e-08	0.000409952
ENSMUSG00000038763	2.91647e-08	-5.11023	-3.50837	-6.71209	2.03192e-06	8.50068	3.26975	Alpk3	protein_coding	alpha-kinase 3 [Source:MGI Symbol;Acc:MGI:2151224]	0.838773	2	1.0767e-09	1.26125e-05
ENSMUSG00000039103	1.12695e-23	-7.53777	-6.38648	-8.68906	9.7022e-21	10.6274	2.87087	Nexn	protein_coding	nexilin [Source:MGI Symbol;Acc:MGI:1916060]	0.972906	2	1.29147e-16	1.54614e-12
ENSMUSG00000039376	4.89689e-17	-5.03969	-3.48091	-6.59846	1.55322e-14	5.40251	0.218466	Synpo2l	protein_coding	synaptopodin 2-like [Source:MGI Symbol;Acc:MGI:1916010]	0.811166	2	8.58017e-17	1.02747e-12
ENSMUSG00000039405	7.78034e-12	-4.82125	-3.27682	-6.36568	1.07789e-09	5.76093	0.82568	Prss23	protein_coding	protease, serine 23 [Source:MGI Symbol;Acc:MGI:1923703]	0.814245	2	3.36448e-12	3.99331e-08
ENSMUSG00000039748	2.46338e-10	4.39097	5.83487	2.94707	2.58183e-08	2.36396	6.89697	Exo1	protein_coding	exonuclease 1 [Source:MGI Symbol;Acc:MGI:1349427]	0.584434	3	0.0670618	1
ENSMUSG00000039952	2.29008e-07	-3.1895	-2.12253	-4.25647	1.31378e-05	7.45746	4.18371	Dag1	protein_coding	dystroglycan 1 [Source:MGI Symbol;Acc:MGI:101864]	0.809113	2	9.95461e-08	0.00114707
ENSMUSG00000040653	1.00161e-11	-3.93225	-2.47653	-5.38796	1.32664e-09	4.34099	0.295584	Ppp1r14c	protein_coding	protein phosphatase 1, regulatory (inhibitor) subunit 14c [Source:MGI Symbol;Acc:MGI:1923392]	0.785201	2	5.00123e-14	5.96147e-10
ENSMUSG00000040659	2.03743e-08	-4.01661	-2.80739	-5.22584	1.48831e-06	6.50378	2.37591	Efhd2	protein_coding	EF hand domain containing 2 [Source:MGI Symbol;Acc:MGI:106504]	0.818966	2	6.94216e-09	8.08414e-05
ENSMUSG00000040666	1.00553e-24	-7.69088	-6.41753	-8.96424	1.00997e-21	9.24488	1.36112	Sh3bgr	protein_coding	SH3-binding domain glutamic acid-rich protein [Source:MGI Symbol;Acc:MGI:1354740]	0.948071	2	1.19333e-18	1.43068e-14
ENSMUSG00000040694	5.78908e-14	-4.36863	-2.93245	-5.8048	1.246e-11	4.75597	0.224677	Apobec2	protein_coding	apolipoprotein B mRNA editing enzyme, catalytic polypeptide 2 [Source:MGI Symbol;Acc:MGI:1343178]	0.812808	2	6.53047e-20	7.84244e-16
ENSMUSG00000040723	2.59717e-11	-4.70938	-3.51197	-5.90678	3.22718e-09	6.90586	2.06215	Rcsd1	protein_coding	RCSD domain containing 1 [Source:MGI Symbol;Acc:MGI:2676394]	0.868534	2	2.38544e-11	2.82079e-07
ENSMUSG00000040752	6.57807e-22	-8.12191	-6.38184	-9.86199	4.40475e-19	9.25087	0.972879	Myh6	protein_coding	myosin, heavy polypeptide 6, cardiac muscle, alpha [Source:MGI Symbol;Acc:MGI:97255]	0.884031	2	6.43841e-14	7.67008e-10
ENSMUSG00000041476	6.59182e-13	-3.95708	-2.58065	-5.33352	1.19613e-10	4.34265	0.22484	Smpx	protein_coding	small muscle protein, X-linked [Source:MGI Symbol;Acc:MGI:1913356]	0.793103	2	7.85584e-19	9.42151e-15
ENSMUSG00000041957	4.73812e-08	-3.63566	-2.36386	-4.90747	3.20835e-06	5.39604	1.66334	Pkp2	protein_coding	plakophilin 2 [Source:MGI Symbol;Acc:MGI:1914701]	0.798645	2	7.05216e-09	8.21154e-05
ENSMUSG00000042155	5.43593e-09	-4.60427	-3.14337	-6.06518	4.51857e-07	7.76202	3.06568	Klhl23	protein_coding	kelch-like 23 [Source:MGI Symbol;Acc:MGI:2683536]	0.822763	2	1.21612e-08	0.00014141
ENSMUSG00000042757	1.18459e-09	-3.90215	-2.71456	-5.08974	1.08991e-07	5.51007	1.50398	Tmem108	protein_coding	transmembrane protein 108 [Source:MGI Symbol;Acc:MGI:1932411]	0.84062	2	5.41799e-11	6.39703e-07
ENSMUSG00000044033	8.54279e-13	-6.12435	-4.73162	-7.51709	1.46438e-10	9.24272	2.95048	Ccdc141	protein_coding	coiled-coil domain containing 141 [Source:MGI Symbol;Acc:MGI:1919735]	0.891831	2	2.59641e-12	3.08324e-08
ENSMUSG00000044938	5.16442e-12	-4.04339	-2.31078	-5.776	7.32315e-10	4.30148	0.114595	Klhl31	protein_coding	kelch-like 31 [Source:MGI Symbol;Acc:MGI:3045305]	0.727011	2	9.99923e-13	1.18841e-08
ENSMUSG00000045659	6.03408e-10	-3.72757	-2.50368	-4.95146	5.86522e-08	4.85008	1.04612	Plekha7	protein_coding	pleckstrin homology domain containing, family A member 7 [Source:MGI Symbol;Acc:MGI:2445094]	0.810961	2	9.52259e-10	1.11624e-05
ENSMUSG00000048096	5.97515e-15	-4.12776	-2.91551	-5.34001	1.46977e-12	4.55689	0.321195	Lmod1	protein_coding	leiomodin 1 (smooth muscle) [Source:MGI Symbol;Acc:MGI:2135671]	0.851806	2	3.21793e-17	3.85444e-13
ENSMUSG00000050379	2.70983e-10	3.37617	4.51573	2.23662	2.79159e-08	0.997482	4.50486	2006-09-01	protein_coding	septin 6 [Source:MGI Symbol;Acc:MGI:1888939]	0.652652	5	0.00443835	1
ENSMUSG00000050953	1.52627e-10	4.78026	6.16713	3.39338	1.68771e-08	4.6512	9.5189	Gja1	protein_coding	gap junction protein, alpha 1 [Source:MGI Symbol;Acc:MGI:95713]	0.835258	5	8.03377e-10	9.42442e-06
ENSMUSG00000051747	2.65481e-38	-10.122	-8.97849	-11.2654	3.19984e-34	12.6714	2.29764	Ttn	protein_coding	titin [Source:MGI Symbol;Acc:MGI:98864]	0.988506	2	1.42422e-17	1.70679e-13
ENSMUSG00000052374	8.85797e-13	-4.64572	-2.97134	-6.32011	1.48285e-10	5.13702	0.38726	Actn2	protein_coding	actinin alpha 2 [Source:MGI Symbol;Acc:MGI:109192]	0.772065	2	1.00383e-10	1.18392e-06
ENSMUSG00000052396	1.51945e-05	3.5342	4.90043	2.16796	0.000537064	1.23645	4.89062	Mogat2	protein_coding	monoacylglycerol O-acyltransferase 2 [Source:MGI Symbol;Acc:MGI:2663253]	0.857994	5	3.71848e-12	4.41198e-08
ENSMUSG00000052727	4.60831e-08	-3.48553	-2.35553	-4.61553	3.13807e-06	12.3405	8.74235	Map1b	protein_coding	microtubule-associated protein 1B [Source:MGI Symbol;Acc:MGI:1306778]	0.865148	2	3.54521e-10	4.16952e-06
ENSMUSG00000053093	1.30451e-16	-6.45423	-4.91724	-7.99121	3.93083e-14	7.41423	0.810524	Myh7	protein_coding	myosin, heavy polypeptide 7, cardiac muscle, beta [Source:MGI Symbol;Acc:MGI:2155600]	0.89922	2	6.12276e-16	7.32466e-12
ENSMUSG00000053702	7.60769e-27	-9.19106	-7.97941	-10.4027	1.01884e-23	11.2804	1.81001	Nebl	protein_coding	nebulette [Source:MGI Symbol;Acc:MGI:1921353]	0.986658	2	1.70207e-19	2.04333e-15
ENSMUSG00000054640	1.56114e-21	-5.54016	-4.17897	-6.90136	8.96021e-19	5.86242	0.128257	Slc8a1	protein_coding	solute carrier family 8 (sodium/calcium exchanger), member 1 [Source:MGI Symbol;Acc:MGI:107956]	0.904557	2	1.0354e-28	1.24683e-24
ENSMUSG00000055027	2.71271e-15	-5.0346	-3.7364	-6.3328	6.95667e-13	5.78865	0.617855	Smyd1	protein_coding	SET and MYND domain containing 1 [Source:MGI Symbol;Acc:MGI:104790]	0.863711	2	3.53534e-17	4.23428e-13
ENSMUSG00000055612	5.82141e-10	3.29409	4.33642	2.25177	5.70451e-08	5.14109	8.51678	Cdca7	protein_coding	cell division cycle associated 7 [Source:MGI Symbol;Acc:MGI:1914203]	0.654583	4	0.000366618	1
ENSMUSG00000059741	4.75043e-22	-6.96972	-4.98054	-8.95889	3.36805e-19	7.59731	0.485361	Myl3	protein_coding	myosin, light polypeptide 3 [Source:MGI Symbol;Acc:MGI:97268]	0.815271	2	1.40482e-12	1.66907e-08
ENSMUSG00000060600	1.77295e-08	-3.82216	-2.70859	-4.93572	1.33558e-06	10.6005	6.61339	Eno3	protein_coding	enolase 3, beta muscle [Source:MGI Symbol;Acc:MGI:95395]	0.879721	2	6.58418e-11	7.77065e-07
ENSMUSG00000060913	4.73319e-11	-3.87707	-2.39226	-5.36187	5.59305e-09	4.31448	0.320487	Trim55	protein_coding	tripartite motif-containing 55 [Source:MGI Symbol;Acc:MGI:3036269]	0.782225	2	4.39985e-14	5.24638e-10
ENSMUSG00000061086	2.83271e-29	-9.06997	-7.74852	-10.3914	8.53568e-26	11.2274	1.94471	Myl4	protein_coding	myosin, light polypeptide 4 [Source:MGI Symbol;Acc:MGI:97267]	0.965004	2	2.64134e-17	3.16433e-13
ENSMUSG00000061816	7.17774e-16	-6.19283	-4.44232	-7.94333	2.01759e-13	6.79434	0.413726	Myl1	protein_coding	myosin, light polypeptide 1 [Source:MGI Symbol;Acc:MGI:97269]	0.843801	2	2.97863e-19	3.57465e-15
ENSMUSG00000067818	3.20405e-21	-7.65769	-6.43482	-8.88056	1.6091e-18	9.8558	1.96286	Myl9	protein_coding	myosin, light polypeptide 9, regulatory [Source:MGI Symbol;Acc:MGI:2138915]	0.951765	2	2.02709e-16	2.42643e-12
ENSMUSG00000068566	8.27741e-08	-3.70483	-2.56853	-4.84114	5.30679e-06	7.80743	3.99333	Myadm	protein_coding	myeloid-associated differentiation marker [Source:MGI Symbol;Acc:MGI:1355332]	0.812089	2	6.26745e-08	0.000724455
ENSMUSG00000068614	8.20789e-29	-10.2204	-8.83633	-11.6046	1.41328e-25	13.0158	2.52323	Actc1	protein_coding	actin, alpha, cardiac muscle 1 [Source:MGI Symbol;Acc:MGI:87905]	0.95587	2	1.04321e-15	1.24727e-11
ENSMUSG00000069601	1.0707e-11	-4.19854	-3.17999	-5.21709	1.40273e-09	8.87917	4.53279	Ank3	protein_coding	ankyrin 3, epithelial [Source:MGI Symbol;Acc:MGI:88026]	0.8828	2	4.39235e-11	5.18781e-07
ENSMUSG00000070407	1.00078e-06	3.72548	4.68448	2.76648	5.06824e-05	0.729529	4.50372	Hs3st3b1	protein_coding	heparan sulfate (glucosamine) 3-O-sulfotransferase 3B1 [Source:MGI Symbol;Acc:MGI:1333853]	0.654457	5	0.0032696	1
ENSMUSG00000072582	2.22504e-07	3.20359	4.32762	2.07956	1.28318e-05	3.32578	6.56379	Ptrh2	protein_coding	peptidyl-tRNA hydrolase 2 [Source:MGI Symbol;Acc:MGI:2444848]	0.629617	4	0.00277935	1
ENSMUSG00000074218	2.68228e-12	-3.63413	-2.25873	-5.00954	3.9913e-10	4.19655	0.46944	Cox7a1	protein_coding	cytochrome c oxidase subunit VIIa 1 [Source:MGI Symbol;Acc:MGI:1316714]	0.760468	2	1.27395e-10	1.5011e-06
ENSMUSG00000079037	9.52543e-08	-3.87205	-2.51513	-5.22897	5.9487e-06	5.70047	1.74018	Prnp	protein_coding	prion protein [Source:MGI Symbol;Acc:MGI:97769]	0.795361	2	1.77253e-08	0.000205897
ENSMUSG00000079243	4.97079e-15	-4.02171	-2.61478	-5.42863	1.24819e-12	4.23591	0.0892447	Xirp1	protein_coding	xin actin-binding repeat containing 1 [Source:MGI Symbol;Acc:MGI:1333878]	0.81486	2	5.20585e-19	6.24597e-15
ENSMUSG00000090053	6.31765e-12	-3.82836	-2.52308	-5.13365	8.85426e-10	4.35515	0.405361	Palm2	protein_coding	paralemmin 2 [Source:MGI Symbol;Acc:MGI:1934601]	0.813218	2	3.04887e-16	3.64888e-12
ENSMUSG00000091898	1.56151e-29	-9.01634	-7.60059	-10.4321	6.27364e-26	10.2589	1.04128	Tnnc1	protein_coding	troponin C, cardiac/slow skeletal [Source:MGI Symbol;Acc:MGI:98779]	0.948071	2	3.70496e-18	4.44151e-14
ENSMUSG00000095464	2.52573e-13	-3.06907	-2.31279	-3.82534	4.99059e-11	3.86638	0.70452	Gm21987	protein_coding	predicted gene 21987 [Source:MGI Symbol;Acc:MGI:5439456]	0.874179	2	1.45567e-15	1.73982e-11
ENSMUSG00000097487	5.93366e-14	-5.27502	-3.98964	-6.56041	1.25471e-11	6.4304	1.01329	Ptges3l	protein_coding	prostaglandin E synthase 3 (cytosolic)-like [Source:MGI Symbol;Acc:MGI:1916146]	0.877874	2	7.66266e-16	9.16531e-12
ENSMUSG00000110344	1.34001e-07	-3.43032	-2.26497	-4.59566	8.07556e-06	5.32457	1.81213	Gm45716	protein_coding	predicted gene 45716 [Source:MGI Symbol;Acc:MGI:5804831]	0.803366	2	1.54094e-08	0.000179119

## Sheet: Isl1_cluster 3
geneID	pval	lfc	lfc.hi	lfc.lo	fdr.x	basemeanA	basemeanB	symbol	biotype	description	auroc	clusts	marker_pval	marker_fdr
ENSMUSG00000000805	1.77237e-13	4.59097	5.49733	3.68461	2.6703e-10	0.382855	5.06637	Car4	protein_coding	carbonic anhydrase 4 [Source:MGI Symbol;Acc:MGI:1096574]	0.876669	5	5.85243e-14	6.97376e-10
ENSMUSG00000001473	1.95672e-07	3.39145	4.56282	2.22009	1.61537e-05	4.1391	7.56329	Tubb6	protein_coding	tubulin, beta 6 class V [Source:MGI Symbol;Acc:MGI:1915201]	0.881081	1	9.31959e-06	0.103559
ENSMUSG00000003153	1.48684e-10	4.30836	5.36071	3.25601	4.97802e-08	1.63139	5.98206	Slc2a3	protein_coding	solute carrier family 2 (facilitated glucose transporter), member 3 [Source:MGI Symbol;Acc:MGI:95757]	0.732588	5	1.42734e-05	0.157749
ENSMUSG00000004187	2.36413e-10	3.16096	3.91697	2.40495	6.4761e-08	0.553454	3.7776	Kifc2	protein_coding	kinesin family member C2 [Source:MGI Symbol;Acc:MGI:109187]	0.797456	5	2.47419e-09	2.89011e-05
ENSMUSG00000006442	8.1545e-14	3.75423	4.64183	2.86662	1.96572e-10	3.83783	7.63224	Srm	protein_coding	spermidine synthase [Source:MGI Symbol;Acc:MGI:102690]	0.750684	4	7.46841e-09	8.69322e-05
ENSMUSG00000010760	2.40975e-09	4.19187	5.24969	3.13405	4.62093e-07	1.17989	5.41433	Phlda2	protein_coding	pleckstrin homology like domain, family A, member 2 [Source:MGI Symbol;Acc:MGI:1202307]	0.96734	5	5.98503e-20	7.18802e-16
ENSMUSG00000024565	1.71641e-08	2.92546	3.68844	2.16247	2.32448e-06	0.569636	3.52098	Sall3	protein_coding	sal-like 3 (Drosophila) [Source:MGI Symbol;Acc:MGI:109295]	0.867376	5	1.09982e-13	1.30956e-09
ENSMUSG00000025491	1.99538e-10	4.50005	5.69277	3.30734	5.72627e-08	2.82868	7.39082	Ifitm1	protein_coding	interferon induced transmembrane protein 1 [Source:MGI Symbol;Acc:MGI:1915963]	0.804764	5	1.54607e-08	0.0001797
ENSMUSG00000026043	1.10722e-10	-3.32191	-2.28301	-4.36081	4.08824e-08	5.28887	1.91154	Col3a1	protein_coding	collagen, type III, alpha 1 [Source:MGI Symbol;Acc:MGI:88453]	0.781792	3	1.26802e-10	1.49423e-06
ENSMUSG00000027547	4.94426e-13	3.30262	4.18551	2.41974	4.9661e-10	6.01893	9.37198	Sall4	protein_coding	sal-like 4 (Drosophila) [Source:MGI Symbol;Acc:MGI:2139360]	0.935944	5	1.36855e-15	1.63583e-11
ENSMUSG00000028399	1.72837e-10	-3.30575	-2.38932	-4.22217	5.34155e-08	6.18635	2.81245	Ptprd	protein_coding	protein tyrosine phosphatase, receptor type, D [Source:MGI Symbol;Acc:MGI:97812]	0.784641	3	3.73675e-10	4.39329e-06
ENSMUSG00000028645	1.43713e-10	3.45222	4.43114	2.47331	4.94908e-08	5.06568	8.56472	Slc2a1	protein_coding	solute carrier family 2 (facilitated glucose transporter), member 1 [Source:MGI Symbol;Acc:MGI:95755]	0.686575	5	0.000630613	1
ENSMUSG00000029464	2.09681e-08	3.23637	4.20604	2.2667	2.6886e-06	2.5487	5.8187	Gpn3	protein_coding	GPN-loop GTPase 3 [Source:MGI Symbol;Acc:MGI:1289326]	0.665283	5	0.00226913	1
ENSMUSG00000029563	2.55486e-08	-3.31611	-2.16448	-4.46773	3.16034e-06	5.6884	2.32079	Foxp2	protein_coding	forkhead box P2 [Source:MGI Symbol;Acc:MGI:2148705]	0.75382	3	7.85219e-09	9.13838e-05
ENSMUSG00000029838	5.61981e-11	-3.93947	-2.95901	-4.91994	2.41913e-08	8.17961	4.16117	Ptn	protein_coding	pleiotrophin [Source:MGI Symbol;Acc:MGI:97804]	0.815074	3	6.06097e-12	7.18649e-08
ENSMUSG00000031781	1.82502e-09	3.19307	4.19836	2.18777	3.66617e-07	4.31422	7.55358	Ciapin1	protein_coding	cytokine induced apoptosis inhibitor 1 [Source:MGI Symbol;Acc:MGI:1922083]	0.752252	1	0.00341637	1
ENSMUSG00000032035	1.0916e-06	-3.33218	-2.04798	-4.61637	6.74721e-05	7.19556	3.80217	Ets1	protein_coding	E26 avian leukemia oncogene 1, 5' domain [Source:MGI Symbol;Acc:MGI:95455]	0.853829	1	2.8068e-05	0.306952
ENSMUSG00000033837	5.28794e-11	3.84676	4.74328	2.95024	2.36058e-08	0.563502	4.49531	Foxh1	protein_coding	forkhead box H1 [Source:MGI Symbol;Acc:MGI:1347465]	0.798899	5	1.68246e-09	1.9673e-05
ENSMUSG00000038633	5.40961e-08	3.22384	4.30212	2.14556	5.98184e-06	4.34776	7.62357	Degs1	protein_coding	delta(4)-desaturase, sphingolipid 1 [Source:MGI Symbol;Acc:MGI:1097711]	0.822072	1	0.000186529	1
ENSMUSG00000039176	4.16331e-09	3.50232	4.4758	2.52883	7.27252e-07	2.23807	5.77222	Polg	protein_coding	polymerase (DNA directed), gamma [Source:MGI Symbol;Acc:MGI:1196389]	0.72973	1	0.00730038	1
ENSMUSG00000045377	1.34773e-11	3.68664	4.57311	2.80018	8.12209e-09	2.08768	5.80589	Tmem88	protein_coding	transmembrane protein 88 [Source:MGI Symbol;Acc:MGI:1914270]	0.860159	5	3.47933e-11	4.11083e-07
ENSMUSG00000049382	6.57315e-08	3.58663	4.74605	2.42721	6.76797e-06	3.61801	7.23674	Krt8	protein_coding	keratin 8 [Source:MGI Symbol;Acc:MGI:96705]	0.831108	5	1.10072e-09	1.28906e-05
ENSMUSG00000050966	3.85077e-08	3.1347	4.17824	2.09117	4.46282e-06	4.92198	8.10757	Lin28a	protein_coding	lin-28 homolog A (C. elegans) [Source:MGI Symbol;Acc:MGI:1890546]	0.783291	5	2.07825e-07	0.00238396
ENSMUSG00000052396	3.68256e-08	3.89135	4.99555	2.78715	4.31301e-06	1.48497	5.43562	Mogat2	protein_coding	monoacylglycerol O-acyltransferase 2 [Source:MGI Symbol;Acc:MGI:2663253]	0.857994	5	3.71848e-12	4.41198e-08
ENSMUSG00000061082	3.29529e-08	2.7429	3.45025	2.03554	3.93249e-06	0.108588	2.89543	Plac1	protein_coding	placental specific protein 1 [Source:MGI Symbol;Acc:MGI:1926287]	0.943703	5	5.87559e-24	7.07068e-20

## Sheet: Isl1_cluster 4
geneID	pval	lfc	lfc.hi	lfc.lo	fdr.x	basemeanA	basemeanB	symbol	biotype	description	auroc	clusts	marker_pval	marker_fdr
ENSMUSG00000006356	8.61613e-13	4.66237	5.75903	3.56572	1.99179e-09	2.40273	7.11439	Crip2	protein_coding	cysteine rich protein 2 [Source:MGI Symbol;Acc:MGI:1915587]	0.864414	1	1.96758e-05	0.216178
ENSMUSG00000013584	5.77892e-07	-3.26586	-2.02039	-4.51134	6.50965e-05	5.00545	1.70445	Aldh1a2	protein_coding	aldehyde dehydrogenase family 1, subfamily A2 [Source:MGI Symbol;Acc:MGI:107928]	0.702576	4	1.23265e-07	0.00141841
ENSMUSG00000017491	1.92702e-10	-3.35345	-2.34039	-4.36651	8.60236e-08	4.62636	1.23798	Rarb	protein_coding	retinoic acid receptor, beta [Source:MGI Symbol;Acc:MGI:97857]	0.738429	4	7.23094e-10	8.48623e-06
ENSMUSG00000018604	1.4221e-08	3.12612	4.07968	2.17257	3.17419e-06	1.97521	5.13654	Tbx3	protein_coding	T-box 3 [Source:MGI Symbol;Acc:MGI:98495]	0.871797	5	3.16048e-12	3.75181e-08
ENSMUSG00000018973	2.51367e-09	-3.37528	-2.31458	-4.43598	8.41591e-07	4.86503	1.45124	Hoxb1	protein_coding	homeobox B1 [Source:MGI Symbol;Acc:MGI:96182]	0.741564	4	6.31672e-10	7.41646e-06
ENSMUSG00000019987	4.92207e-11	-4.51825	-3.31141	-5.72509	3.46786e-08	7.07875	2.50401	Arg1	protein_coding	arginase, liver [Source:MGI Symbol;Acc:MGI:88070]	0.778158	4	8.31528e-12	9.85361e-08
ENSMUSG00000021136	7.22306e-12	-3.65609	-2.64132	-4.67086	6.69689e-09	4.75412	1.0547	Smoc1	protein_coding	SPARC related modular calcium binding 1 [Source:MGI Symbol;Acc:MGI:1929878]	0.759462	4	7.40543e-12	8.77766e-08
ENSMUSG00000025268	2.17328e-11	3.87029	4.92682	2.81376	1.63716e-08	4.40721	8.32239	Maged2	protein_coding	melanoma antigen, family D, 2 [Source:MGI Symbol;Acc:MGI:1933391]	0.696396	1	0.022529	1
ENSMUSG00000026640	1.03017e-08	-3.26451	-2.24555	-4.28347	2.43463e-06	6.35262	3.05552	Plxna2	protein_coding	plexin A2 [Source:MGI Symbol;Acc:MGI:107684]	0.740424	4	1.93006e-08	0.000224061
ENSMUSG00000029432	1.07034e-13	2.78726	3.54252	2.03201	4.30026e-10	5.92636	8.78692	Gbas	protein_coding	glioblastoma amplified sequence [Source:MGI Symbol;Acc:MGI:1278343]	0.801108	2	2.30637e-07	0.00264403
ENSMUSG00000031239	1.09154e-07	3.33541	4.41226	2.25855	1.75417e-05	3.34085	6.70329	Itm2a	protein_coding	integral membrane protein 2A [Source:MGI Symbol;Acc:MGI:107706]	0.722523	1	0.00963769	1
ENSMUSG00000031538	6.6819e-11	-3.55586	-2.51412	-4.59759	4.02685e-08	5.28889	1.68692	Plat	protein_coding	plasminogen activator, tissue [Source:MGI Symbol;Acc:MGI:97610]	0.76881	4	2.4323e-11	2.87571e-07
ENSMUSG00000031965	1.12473e-10	3.43174	4.26784	2.59563	5.64851e-08	0.50928	3.96993	Tbx20	protein_coding	T-box 20 [Source:MGI Symbol;Acc:MGI:1888496]	0.811987	2	1.6636e-09	1.94541e-05
ENSMUSG00000035783	1.24782e-09	4.02431	5.16943	2.87919	4.7e-07	1.49409	5.54481	Acta2	protein_coding	actin, alpha 2, smooth muscle, aorta [Source:MGI Symbol;Acc:MGI:87909]	0.988916	2	1.50152e-17	1.79913e-13
ENSMUSG00000037335	1.27307e-10	3.06883	3.85494	2.28272	6.13773e-08	0.130776	3.22829	Hand1	protein_coding	heart and neural crest derivatives expressed transcript 1 [Source:MGI Symbol;Acc:MGI:103577]	0.927463	5	7.4357e-23	8.94515e-19
ENSMUSG00000037664	3.23253e-12	3.48622	4.51112	2.46133	4.21502e-09	5.61709	9.21927	Cdkn1c	protein_coding	cyclin-dependent kinase inhibitor 1C (P57) [Source:MGI Symbol;Acc:MGI:104564]	0.727217	2	9.47498e-05	1
ENSMUSG00000038235	8.20725e-09	3.0775	4.08338	2.07161	2.06092e-06	1.4896	4.61149	F11r	protein_coding	F11 receptor [Source:MGI Symbol;Acc:MGI:1321398]	0.791441	1	0.000355655	1
ENSMUSG00000039476	8.19657e-11	-3.12428	-2.25174	-3.99682	4.4906e-08	5.96708	2.80916	Prrx2	protein_coding	paired related homeobox 2 [Source:MGI Symbol;Acc:MGI:98218]	0.77508	4	1.13669e-10	1.33993e-06
ENSMUSG00000039770	1.90838e-09	3.44048	4.39927	2.4817	6.76519e-07	1.7608	5.23859	Ypel5	protein_coding	yippee-like 5 (Drosophila) [Source:MGI Symbol;Acc:MGI:1916937]	0.731219	2	4.30362e-05	0.4669
ENSMUSG00000040752	5.85998e-09	2.89851	3.78763	2.00939	1.58907e-06	0.277697	3.20027	Myh6	protein_coding	myosin, heavy polypeptide 6, cardiac muscle, alpha [Source:MGI Symbol;Acc:MGI:97255]	0.884031	2	6.43841e-14	7.67008e-10
ENSMUSG00000050288	7.38879e-10	-3.0251	-2.17916	-3.87104	2.96857e-07	6.94622	3.87634	Fzd2	protein_coding	frizzled class receptor 2 [Source:MGI Symbol;Acc:MGI:1888513]	0.767271	4	6.40666e-10	7.52142e-06
ENSMUSG00000068614	2.08675e-06	3.42137	4.67316	2.16958	0.000179654	1.81188	5.257	Actc1	protein_coding	actin, alpha, cardiac muscle 1 [Source:MGI Symbol;Acc:MGI:87905]	0.95587	2	1.04321e-15	1.24727e-11

## Sheet: Isl1_cluster 5
geneID	pval	lfc	lfc.hi	lfc.lo	fdr.x	basemeanA	basemeanB	symbol	biotype	description	auroc	clusts	marker_pval	marker_fdr
ENSMUSG00000000094	1.07733e-21	-5.6843	-4.35104	-7.01756	2.38381e-18	6.02664	0.174515	Tbx4	protein_coding	T-box 4 [Source:MGI Symbol;Acc:MGI:102556]	0.886323	5	5.9099e-27	7.11552e-23
ENSMUSG00000000296	3.04414e-11	-4.40255	-3.26564	-5.53946	9.17275e-09	6.2548	1.7531	Tpd52l1	protein_coding	tumor protein D52-like 1 [Source:MGI Symbol;Acc:MGI:1298386]	0.830476	5	8.28113e-12	9.81397e-08
ENSMUSG00000000690	1.36354e-19	-4.93059	-3.99286	-5.86831	1.36957e-16	5.62663	0.5627	Hoxb6	protein_coding	homeobox B6 [Source:MGI Symbol;Acc:MGI:96187]	0.904908	5	1.43287e-22	1.72346e-18
ENSMUSG00000000782	7.29451e-07	-3.1614	-2.11583	-4.20696	6.8688e-05	6.00166	2.76052	Tcf7	protein_coding	transcription factor 7, T cell specific [Source:MGI Symbol;Acc:MGI:98507]	0.772555	5	2.00333e-07	0.00229882
ENSMUSG00000000805	4.28473e-14	-6.42875	-5.16598	-7.69152	2.5822e-11	9.25726	2.6406	Car4	protein_coding	carbonic anhydrase 4 [Source:MGI Symbol;Acc:MGI:1096574]	0.876669	5	5.85243e-14	6.97376e-10
ENSMUSG00000000938	9.12151e-17	-4.31065	-3.06672	-5.55458	7.85297e-14	4.65484	0.214436	Hoxa10	protein_coding	homeobox A10 [Source:MGI Symbol;Acc:MGI:96171]	0.835258	5	1.12548e-21	1.35317e-17
ENSMUSG00000001288	4.43291e-13	-3.89905	-2.88136	-4.91675	1.97889e-10	4.91264	0.924579	Rarg	protein_coding	retinoic acid receptor, gamma [Source:MGI Symbol;Acc:MGI:97858]	0.8524	5	1.53404e-14	1.83026e-10
ENSMUSG00000001435	1.60704e-08	3.48013	4.57768	2.38257	2.48328e-06	3.14399	6.64781	Col18a1	protein_coding	collagen, type XVIII, alpha 1 [Source:MGI Symbol;Acc:MGI:88451]	0.611261	1	0.197249	1
ENSMUSG00000001657	1.18666e-21	-4.40636	-3.37531	-5.43741	2.38381e-18	4.66374	0.137874	Hoxc8	protein_coding	homeobox C8 [Source:MGI Symbol;Acc:MGI:96198]	0.872609	5	1.22285e-24	1.47183e-20
ENSMUSG00000003153	3.70824e-05	-3.65687	-2.10968	-5.20406	0.00154655	7.87273	4.14636	Slc2a3	protein_coding	solute carrier family 2 (facilitated glucose transporter), member 3 [Source:MGI Symbol;Acc:MGI:95757]	0.732588	5	1.42734e-05	0.157749
ENSMUSG00000003644	5.8721e-07	-3.3496	-2.16671	-4.53249	5.70778e-05	6.31852	2.90395	Rps6ka1	protein_coding	ribosomal protein S6 kinase polypeptide 1 [Source:MGI Symbol;Acc:MGI:104558]	0.780404	5	1.25582e-07	0.00144482
ENSMUSG00000004187	3.30145e-09	-3.64445	-2.63738	-4.65151	6.1219e-07	5.99425	2.24711	Kifc2	protein_coding	kinesin family member C2 [Source:MGI Symbol;Acc:MGI:109187]	0.797456	5	2.47419e-09	2.89011e-05
ENSMUSG00000005087	8.61137e-09	-4.0984	-2.659	-5.53781	1.42182e-06	5.49183	1.29721	Cd44	protein_coding	CD44 antigen [Source:MGI Symbol;Acc:MGI:88338]	0.781306	5	1.56614e-10	1.84507e-06
ENSMUSG00000005583	2.40987e-06	3.46099	4.57346	2.34852	0.000187395	1.24572	4.74883	Mef2c	protein_coding	myocyte enhancer factor 2C [Source:MGI Symbol;Acc:MGI:99458]	0.916256	2	3.1154e-13	3.70732e-09
ENSMUSG00000005672	2.26299e-09	-3.96375	-2.68588	-5.24161	4.47145e-07	5.42788	1.38375	Kit	protein_coding	KIT proto-oncogene receptor tyrosine kinase [Source:MGI Symbol;Acc:MGI:96677]	0.771171	1	0.000302552	1
ENSMUSG00000006311	2.18394e-09	-3.53363	-2.11508	-4.95219	4.38718e-07	4.5452	0.915095	Etv2	protein_coding	ets variant 2 [Source:MGI Symbol;Acc:MGI:99253]	0.846847	1	4.55291e-08	0.000527136
ENSMUSG00000006390	7.53645e-11	-4.30636	-3.21191	-5.40081	1.97471e-08	7.58297	3.10529	Elovl1	protein_coding	elongation of very long chain fatty acids (FEN1/Elo2, SUR4/Elo3, yeast)-like 1 [Source:MGI Symbol;Acc:MGI:1858959]	0.809816	5	2.889e-09	3.3732e-05
ENSMUSG00000010760	6.27549e-24	-8.20004	-7.13346	-9.26662	1.89096e-20	11.2502	2.79421	Phlda2	protein_coding	pleckstrin homology like domain, family A, member 2 [Source:MGI Symbol;Acc:MGI:1202307]	0.96734	5	5.98503e-20	7.18802e-16
ENSMUSG00000018217	1.2158e-09	-5.22595	-3.79572	-6.65618	2.6168e-07	9.0928	3.72723	Pmp22	protein_coding	peripheral myelin protein 22 [Source:MGI Symbol;Acc:MGI:97631]	0.834536	5	3.71745e-10	4.37098e-06
ENSMUSG00000018604	1.95154e-12	-4.85012	-3.75215	-5.94809	8.11102e-10	8.16243	3.18654	Tbx3	protein_coding	T-box 3 [Source:MGI Symbol;Acc:MGI:98495]	0.871797	5	3.16048e-12	3.75181e-08
ENSMUSG00000018906	2.97086e-08	-3.67184	-2.56398	-4.7797	4.02334e-06	6.91761	3.12882	P4ha2	protein_coding	procollagen-proline, 2-oxoglutarate 4-dioxygenase (proline 4-hydroxylase), alpha II polypeptide [Source:MGI Symbol;Acc:MGI:894286]	0.789877	5	4.16238e-08	0.000482045
ENSMUSG00000019880	1.2728e-09	-3.85269	-2.51571	-5.18967	2.69141e-07	4.97958	1.03389	Rspo3	protein_coding	R-spondin 3 [Source:MGI Symbol;Acc:MGI:1920030]	0.792494	5	9.14292e-12	1.08334e-07
ENSMUSG00000019987	1.65371e-06	3.84127	4.90001	2.78252	0.000140367	0.846414	4.75825	Arg1	protein_coding	arginase, liver [Source:MGI Symbol;Acc:MGI:88070]	0.778158	4	8.31528e-12	9.85361e-08
ENSMUSG00000020160	1.12315e-09	4.38842	5.72913	3.04771	2.46133e-07	3.98322	8.47006	Meis1	protein_coding	Meis homeobox 1 [Source:MGI Symbol;Acc:MGI:104717]	0.670163	3	0.000231672	1
ENSMUSG00000020363	6.11038e-06	-3.58463	-2.06423	-5.10503	0.000385594	5.85088	2.20295	Gfpt2	protein_coding	glutamine fructose-6-phosphate transaminase 2 [Source:MGI Symbol;Acc:MGI:1338883]	0.740076	5	1.30111e-06	0.0147559
ENSMUSG00000020875	6.04837e-13	-3.06076	-2.00942	-4.1121	2.60361e-10	3.36874	0.23018	Hoxb9	protein_coding	homeobox B9 [Source:MGI Symbol;Acc:MGI:96190]	0.795922	5	8.61082e-16	1.02968e-11
ENSMUSG00000021506	1.0968e-20	-3.74291	-2.76951	-4.71631	1.65246e-17	4.05553	0.185797	Pitx1	protein_coding	paired-like homeodomain transcription factor 1 [Source:MGI Symbol;Acc:MGI:107374]	0.880278	5	8.90313e-27	1.07176e-22
ENSMUSG00000021835	2.98944e-09	-4.12785	-2.88877	-5.36693	5.71932e-07	7.03087	2.78211	Bmp4	protein_coding	bone morphogenetic protein 4 [Source:MGI Symbol;Acc:MGI:88180]	0.806117	5	5.80081e-09	6.75852e-05
ENSMUSG00000021994	3.00261e-11	-4.59067	-3.46463	-5.71672	9.17275e-09	9.75926	5.01457	Wnt5a	protein_coding	wingless-type MMTV integration site family, member 5A [Source:MGI Symbol;Acc:MGI:98958]	0.889029	5	8.7962e-13	1.0456e-08
ENSMUSG00000022346	2.62133e-10	-4.85566	-3.57983	-6.13149	6.31898e-08	7.71445	2.73954	Myc	protein_coding	myelocytomatosis oncogene [Source:MGI Symbol;Acc:MGI:97250]	0.835078	5	1.16719e-10	1.37565e-06
ENSMUSG00000022464	5.62464e-11	-3.68292	-2.69629	-4.66955	1.54077e-08	10.9499	7.15757	Slc38a4	protein_coding	solute carrier family 38, member 4 [Source:MGI Symbol;Acc:MGI:1916604]	0.892818	5	6.11612e-13	7.27452e-09
ENSMUSG00000022483	7.23793e-07	3.14765	4.09484	2.20045	6.8688e-05	0.852572	4.04435	Col2a1	protein_coding	collagen, type II, alpha 1 [Source:MGI Symbol;Acc:MGI:88452]	0.780275	2	7.09352e-07	0.00808164
ENSMUSG00000022748	9.99485e-08	-3.14012	-2.21921	-4.06103	1.16959e-05	6.36191	3.11982	Cmss1	protein_coding	cms small ribosomal subunit 1 [Source:MGI Symbol;Acc:MGI:1913747]	0.77878	5	1.68186e-07	0.00193229
ENSMUSG00000024501	1.12545e-06	3.65573	4.81065	2.50081	0.000100482	1.99874	5.68744	Dpysl3	protein_coding	dihydropyrimidinase-like 3 [Source:MGI Symbol;Acc:MGI:1349762]	0.670464	2	0.00312984	1
ENSMUSG00000024538	1.82799e-08	-3.71718	-2.74366	-4.6907	2.75409e-06	8.56127	4.68371	Ppic	protein_coding	peptidylprolyl isomerase C [Source:MGI Symbol;Acc:MGI:97751]	0.768468	1	0.00166662	1
ENSMUSG00000024565	1.07635e-13	-5.17243	-4.02659	-6.31827	5.64054e-11	7.10032	1.79663	Sall3	protein_coding	sal-like 3 (Drosophila) [Source:MGI Symbol;Acc:MGI:109295]	0.867376	5	1.09982e-13	1.30956e-09
ENSMUSG00000025491	1.54561e-08	-4.18403	-3.15375	-5.21432	2.41938e-06	9.75824	5.38562	Ifitm1	protein_coding	interferon induced transmembrane protein 1 [Source:MGI Symbol;Acc:MGI:1915963]	0.804764	5	1.54607e-08	0.0001797
ENSMUSG00000026185	1.47151e-11	5.08286	6.30762	3.8581	4.79354e-09	2.20011	7.37503	Igfbp5	protein_coding	insulin-like growth factor binding protein 5 [Source:MGI Symbol;Acc:MGI:96440]	0.80665	2	1.25646e-07	0.00144543
ENSMUSG00000026418	2.56774e-06	3.69735	5.10508	2.28963	0.000195219	2.49132	6.20327	Tnni1	protein_coding	troponin I, skeletal, slow 1 [Source:MGI Symbol;Acc:MGI:105073]	0.987685	2	1.70871e-17	2.04721e-13
ENSMUSG00000026447	1.09192e-06	3.19162	4.31798	2.06526	9.82155e-05	2.11773	5.3681	Pik3c2b	protein_coding	phosphoinositide-3-kinase, class 2, beta polypeptide [Source:MGI Symbol;Acc:MGI:2685045]	0.81982	1	0.000189577	1
ENSMUSG00000026640	3.01738e-08	3.60718	4.6095	2.60485	4.04095e-06	1.16576	4.82518	Plxna2	protein_coding	plexin A2 [Source:MGI Symbol;Acc:MGI:107684]	0.740424	4	1.93006e-08	0.000224061
ENSMUSG00000027102	6.90012e-15	-4.21274	-2.95934	-5.46614	4.6204e-12	4.6289	0.297888	Hoxd8	protein_coding	homeobox D8 [Source:MGI Symbol;Acc:MGI:96209]	0.818477	5	7.86868e-19	9.43612e-15
ENSMUSG00000027547	7.63381e-12	-3.46005	-2.56435	-4.35574	2.70619e-09	11.4106	7.83591	Sall4	protein_coding	sal-like 4 (Drosophila) [Source:MGI Symbol;Acc:MGI:2139360]	0.935944	5	1.36855e-15	1.63583e-11
ENSMUSG00000028278	1.80054e-05	3.334	4.64348	2.02452	0.000896771	3.30464	6.6868	Rragd	protein_coding	Ras-related GTP binding D [Source:MGI Symbol;Acc:MGI:1098604]	0.790538	2	5.3023e-07	0.00604993
ENSMUSG00000028289	2.75892e-07	2.85744	3.57849	2.13638	3.05076e-05	0.236687	3.13753	Epha7	protein_coding	Eph receptor A7 [Source:MGI Symbol;Acc:MGI:95276]	0.65743	2	0.00333851	1
ENSMUSG00000028364	6.52357e-09	3.13956	3.83597	2.44315	1.13954e-06	0.0409092	3.22009	Tnc	protein_coding	tenascin C [Source:MGI Symbol;Acc:MGI:101922]	0.62931	2	0.0145639	1
ENSMUSG00000028399	5.37442e-08	3.2346	4.14669	2.32251	6.60999e-06	1.01941	4.30419	Ptprd	protein_coding	protein tyrosine phosphatase, receptor type, D [Source:MGI Symbol;Acc:MGI:97812]	0.784641	3	3.73675e-10	4.39329e-06
ENSMUSG00000029413	9.95944e-10	-3.66032	-2.39273	-4.92791	2.26493e-07	4.69402	0.946427	Naaa	protein_coding	N-acylethanolamine acid amidase [Source:MGI Symbol;Acc:MGI:1914361]	0.791952	5	9.9819e-12	1.18226e-07
ENSMUSG00000029563	6.89768e-12	3.5424	4.3721	2.71271	2.51933e-09	0.199523	3.87891	Foxp2	protein_coding	forkhead box P2 [Source:MGI Symbol;Acc:MGI:2148705]	0.75382	3	7.85219e-09	9.13838e-05
ENSMUSG00000029752	1.19244e-05	-3.57638	-2.19754	-4.95523	0.000644505	8.24032	4.58391	Asns	protein_coding	asparagine synthetase [Source:MGI Symbol;Acc:MGI:1350929]	0.768044	5	6.30456e-07	0.00718594
ENSMUSG00000029838	2.5473e-16	5.4821	6.33709	4.6271	2.04684e-13	0.647919	6.22526	Ptn	protein_coding	pleiotrophin [Source:MGI Symbol;Acc:MGI:97804]	0.815074	3	6.06097e-12	7.18649e-08
ENSMUSG00000030551	3.79741e-08	3.98824	5.26876	2.70772	4.97502e-06	3.89829	7.95472	Nr2f2	protein_coding	nuclear receptor subfamily 2, group F, member 2 [Source:MGI Symbol;Acc:MGI:1352452]	0.747345	3	8.66367e-08	0.000999355
ENSMUSG00000030934	8.94322e-10	-4.25782	-3.16055	-5.35509	2.07294e-07	9.69213	5.27271	Oat	protein_coding	ornithine aminotransferase [Source:MGI Symbol;Acc:MGI:97394]	0.852941	5	8.36315e-11	9.86601e-07
ENSMUSG00000030946	6.57444e-14	-5.20853	-4.0055	-6.41155	3.6019e-11	7.33802	2.02203	Lhpp	protein_coding	phospholysine phosphohistidine inorganic pyrophosphate phosphatase [Source:MGI Symbol;Acc:MGI:1923679]	0.875406	5	2.05229e-13	2.44264e-09
ENSMUSG00000031326	2.24783e-27	-7.45852	-6.10862	-8.80843	1.35466e-23	7.87635	0.197948	Cdx4	protein_coding	caudal type homeobox 4 [Source:MGI Symbol;Acc:MGI:88362]	0.945958	5	7.54661e-32	9.08913e-28
ENSMUSG00000031434	1.19136e-28	-7.38911	-6.44815	-8.33008	1.43594e-24	8.27954	0.688409	Morc4	protein_coding	microrchidia 4 [Source:MGI Symbol;Acc:MGI:1922996]	0.974107	5	7.87576e-27	9.48163e-23
ENSMUSG00000031438	3.53192e-13	-3.98107	-2.84793	-5.1142	1.63732e-10	4.71834	0.64841	Rnf128	protein_coding	ring finger protein 128 [Source:MGI Symbol;Acc:MGI:1914139]	0.832912	5	5.57046e-15	6.65447e-11
ENSMUSG00000031538	8.52472e-09	3.2915	4.01281	2.57018	1.42182e-06	0.162349	3.50759	Plat	protein_coding	plasminogen activator, tissue [Source:MGI Symbol;Acc:MGI:97610]	0.76881	4	2.4323e-11	2.87571e-07
ENSMUSG00000032387	2.22857e-08	-3.81035	-2.73263	-4.88807	3.16011e-06	7.70515	3.78292	Rbpms2	protein_coding	RNA binding protein with multiple splicing 2 [Source:MGI Symbol;Acc:MGI:1919223]	0.817394	5	3.55858e-09	4.15286e-05
ENSMUSG00000032766	1.22963e-07	2.96955	3.71291	2.22619	1.39818e-05	0.379902	3.41454	Gng11	protein_coding	guanine nucleotide binding protein (G protein), gamma 11 [Source:MGI Symbol;Acc:MGI:1913316]	0.80991	1	0.000116711	1
ENSMUSG00000033792	1.14858e-06	-3.27659	-2.12026	-4.43292	0.000101793	6.41187	3.06605	Atp7a	protein_coding	ATPase, Cu++ transporting, alpha polypeptide [Source:MGI Symbol;Acc:MGI:99400]	0.77454	5	2.79825e-07	0.00320456
ENSMUSG00000033837	1.58394e-09	-4.44473	-3.2283	-5.66116	3.29159e-07	7.19925	2.62873	Foxh1	protein_coding	forkhead box H1 [Source:MGI Symbol;Acc:MGI:1347465]	0.798899	5	1.68246e-09	1.9673e-05
ENSMUSG00000036523	5.01232e-12	-4.52736	-3.44348	-5.61123	1.94882e-09	7.38615	2.75525	Greb1	protein_coding	gene regulated by estrogen in breast cancer protein [Source:MGI Symbol;Acc:MGI:2149712]	0.855106	5	1.73353e-11	2.05181e-07
ENSMUSG00000037335	8.88952e-21	-7.10292	-5.80282	-8.40302	1.53065e-17	8.19881	0.899279	Hand1	protein_coding	heart and neural crest derivatives expressed transcript 1 [Source:MGI Symbol;Acc:MGI:103577]	0.927463	5	7.4357e-23	8.94515e-19
ENSMUSG00000038227	4.77744e-20	-5.31956	-4.06226	-6.57687	5.23477e-17	5.70798	0.237329	Hoxa9	protein_coding	homeobox A9 [Source:MGI Symbol;Acc:MGI:96180]	0.868279	5	4.16275e-24	5.00987e-20
ENSMUSG00000038236	2.27729e-18	-4.43353	-3.36426	-5.50279	2.1114e-15	4.87881	0.337352	Hoxa7	protein_coding	homeobox A7 [Source:MGI Symbol;Acc:MGI:96179]	0.871527	5	9.91339e-21	1.19139e-16
ENSMUSG00000038677	3.23774e-09	-3.14383	-2.21429	-4.07338	6.09758e-07	5.01138	1.80154	Scube3	protein_coding	signal peptide, CUB domain, EGF-like 3 [Source:MGI Symbol;Acc:MGI:3045253]	0.818567	5	1.0891e-09	1.27566e-05
ENSMUSG00000039115	7.54877e-06	3.05464	4.07186	2.03742	0.000450423	1.17958	4.28124	Itga9	protein_coding	integrin alpha 9 [Source:MGI Symbol;Acc:MGI:104756]	0.69009	1	0.0231375	1
ENSMUSG00000039200	6.31576e-12	-3.13149	-2.08819	-4.1748	2.37887e-09	4.21844	1.00389	Atf7ip2	protein_coding	activating transcription factor 7 interacting protein 2 [Source:MGI Symbol;Acc:MGI:1922579]	0.826507	5	4.95823e-13	5.89782e-09
ENSMUSG00000041688	9.1456e-11	-4.04606	-2.99611	-5.096	2.2965e-08	9.94421	5.7628	Amot	protein_coding	angiomotin [Source:MGI Symbol;Acc:MGI:108440]	0.86485	5	2.23772e-11	2.64656e-07
ENSMUSG00000041959	2.37781e-08	-3.428	-2.47771	-4.37829	3.33253e-06	8.02833	4.45889	S100a10	protein_coding	S100 calcium binding protein A10 (calpactin) [Source:MGI Symbol;Acc:MGI:1339468]	0.802959	5	2.31908e-08	0.000269106
ENSMUSG00000042812	3.36769e-07	-3.2043	-2.12654	-4.28207	3.56059e-05	7.28129	3.94183	Foxf1	protein_coding	forkhead box F1 [Source:MGI Symbol;Acc:MGI:1347470]	0.746301	5	5.19204e-06	0.0581042
ENSMUSG00000042821	1.11129e-09	-3.99726	-2.84556	-5.14896	2.46133e-07	6.19412	2.0925	Snai1	protein_coding	snail family zinc finger 1 [Source:MGI Symbol;Acc:MGI:98330]	0.815319	5	2.59247e-10	3.05134e-06
ENSMUSG00000042834	1.6549e-13	5.09561	6.24623	3.94498	8.31103e-11	2.59875	7.78377	Nrep	protein_coding	neuronal regeneration related protein [Source:MGI Symbol;Acc:MGI:99444]	0.713999	3	3.59664e-06	0.0403974
ENSMUSG00000044033	4.41189e-06	3.23477	4.38404	2.08549	0.000293491	1.14763	4.44601	Ccdc141	protein_coding	coiled-coil domain containing 141 [Source:MGI Symbol;Acc:MGI:1919735]	0.891831	2	2.59641e-12	3.08324e-08
ENSMUSG00000045377	1.22067e-11	-4.22076	-3.20526	-5.23626	4.08688e-09	8.39202	4.03465	Tmem88	protein_coding	transmembrane protein 88 [Source:MGI Symbol;Acc:MGI:1914270]	0.860159	5	3.47933e-11	4.11083e-07
ENSMUSG00000046550	3.04101e-20	-7.2478	-6.12886	-8.36675	3.66533e-17	10.8763	3.40338	Spin2c	protein_coding	spindlin family, member 2C [Source:MGI Symbol;Acc:MGI:3605548]	0.955251	5	6.44241e-18	7.72188e-14
ENSMUSG00000048277	5.50676e-08	-3.80972	-2.57275	-5.04669	6.70434e-06	6.03243	2.13298	Syngr2	protein_coding	synaptogyrin 2 [Source:MGI Symbol;Acc:MGI:1328324]	0.794144	1	0.000168337	1
ENSMUSG00000048450	3.928e-15	-5.31003	-4.19137	-6.42868	2.78495e-12	6.94614	1.49914	Msx1	protein_coding	msh homeobox 1 [Source:MGI Symbol;Acc:MGI:97168]	0.882894	5	1.9306e-15	2.30726e-11
ENSMUSG00000048528	2.17854e-20	-4.19386	-2.93687	-5.45085	2.91755e-17	4.41354	0.0348239	Nkx1-2	protein_coding	NK1 transcription factor related, locus 2 (Drosophila) [Source:MGI Symbol;Acc:MGI:104806]	0.83616	5	2.19737e-27	2.64586e-23
ENSMUSG00000049382	4.31252e-09	-4.39131	-3.20507	-5.57755	7.75803e-07	10.0177	5.45781	Krt8	protein_coding	keratin 8 [Source:MGI Symbol;Acc:MGI:96705]	0.831108	5	1.10072e-09	1.28906e-05
ENSMUSG00000050447	5.03006e-11	-3.46934	-2.24964	-4.68904	1.40994e-08	4.0501	0.483765	Lypd6	protein_coding	LY6/PLAUR domain containing 6 [Source:MGI Symbol;Acc:MGI:2443848]	0.783833	5	2.31226e-14	2.7583e-10
ENSMUSG00000051159	2.85932e-08	-3.65847	-2.38811	-4.92882	3.91629e-06	5.06006	1.32009	Cited1	protein_coding	Cbp/p300-interacting transactivator with Glu/Asp-rich carboxy-terminal domain 1 [Source:MGI Symbol;Acc:MGI:108023]	0.764616	5	4.7343e-09	5.5202e-05
ENSMUSG00000051747	1.53667e-05	3.51706	4.76438	2.26973	0.00078815	0.896502	4.43553	Ttn	protein_coding	titin [Source:MGI Symbol;Acc:MGI:98864]	0.988506	2	1.42422e-17	1.70679e-13
ENSMUSG00000052396	2.85429e-13	-5.717	-4.67901	-6.755	1.37611e-10	9.26115	3.32885	Mogat2	protein_coding	monoacylglycerol O-acyltransferase 2 [Source:MGI Symbol;Acc:MGI:2663253]	0.857994	5	3.71848e-12	4.41198e-08
ENSMUSG00000055639	6.8716e-11	3.40105	4.02372	2.77838	1.84052e-08	0.0546054	3.50532	Dach1	protein_coding	dachshund 1 (Drosophila) [Source:MGI Symbol;Acc:MGI:1277991]	0.677896	4	1.19322e-05	0.132233
ENSMUSG00000056234	1.98721e-06	-3.42944	-2.17026	-4.68861	0.000162938	7.42277	3.88121	Ncoa4	protein_coding	nuclear receptor coactivator 4 [Source:MGI Symbol;Acc:MGI:1350932]	0.739534	5	7.98817e-06	0.0889642
ENSMUSG00000059921	2.06999e-08	-3.58452	-2.38567	-4.78336	3.00598e-06	6.54385	2.84529	Unc5c	protein_coding	unc-5 netrin receptor C [Source:MGI Symbol;Acc:MGI:1095412]	0.775983	5	1.52855e-07	0.00175737
ENSMUSG00000060147	1.4806e-06	-3.17114	-2.05348	-4.28881	0.000126565	6.19285	2.93384	Serpinb6a	protein_coding	serine (or cysteine) peptidase inhibitor, clade B, member 6a [Source:MGI Symbol;Acc:MGI:103123]	0.764865	1	0.00127403	1
ENSMUSG00000061082	2.1494e-24	-7.41106	-6.28407	-8.53805	8.63556e-21	8.42337	0.819113	Plac1	protein_coding	placental specific protein 1 [Source:MGI Symbol;Acc:MGI:1926287]	0.943703	5	5.87559e-24	7.07068e-20
ENSMUSG00000061436	6.20171e-07	3.112	4.11592	2.10808	5.97993e-05	1.6417	4.79564	Hipk2	protein_coding	homeodomain interacting protein kinase 2 [Source:MGI Symbol;Acc:MGI:1314872]	0.68555	2	0.00134077	1
ENSMUSG00000062393	3.92472e-09	-3.4729	-2.11739	-4.82841	7.16737e-07	4.13307	0.563607	Dgkk	protein_coding	diacylglycerol kinase kappa [Source:MGI Symbol;Acc:MGI:3580254]	0.752977	5	6.09957e-12	7.23164e-08
ENSMUSG00000063052	2.08383e-06	-2.97172	-2.00655	-3.93689	0.000168566	8.08009	4.9652	Lrrc40	protein_coding	leucine rich repeat containing 40 [Source:MGI Symbol;Acc:MGI:1914394]	0.757849	5	2.01076e-06	0.0227336
ENSMUSG00000063450	6.71946e-07	3.26407	4.32098	2.20716	6.42775e-05	2.17491	5.48378	Syne2	protein_coding	spectrin repeat containing, nuclear envelope 2 [Source:MGI Symbol;Acc:MGI:2449316]	0.713934	3	3.33106e-06	0.0374511
ENSMUSG00000067786	5.14409e-14	4.74632	5.72403	3.76862	2.95246e-11	1.74887	6.5708	Nnat	protein_coding	neuronatin [Source:MGI Symbol;Acc:MGI:104716]	0.66453	3	0.00036307	1
ENSMUSG00000069171	2.3698e-06	2.84974	3.58544	2.11404	0.000185475	0.346947	3.23536	Nr2f1	protein_coding	nuclear receptor subfamily 2, group F, member 1 [Source:MGI Symbol;Acc:MGI:1352451]	0.584628	3	0.0428816	1
ENSMUSG00000072944	3.1014e-12	-5.12342	-3.55497	-6.69187	1.24604e-09	6.01206	0.754551	Nup62cl	protein_coding	nucleoporin 62 C-terminal like [Source:MGI Symbol;Acc:MGI:2685565]	0.810177	5	2.10575e-15	2.51637e-11
ENSMUSG00000073209	2.3903e-11	-4.92909	-3.41316	-6.44502	7.58166e-09	5.8871	0.825872	Klf14	protein_coding	Kruppel-like factor 14 [Source:MGI Symbol;Acc:MGI:3577024]	0.797636	5	1.52446e-14	1.81899e-10
ENSMUSG00000079042	1.94361e-08	-3.78063	-2.45324	-5.10802	2.85687e-06	5.22568	1.36406	Apela	protein_coding	apelin receptor early endogenous ligand [Source:MGI Symbol;Acc:MGI:3642370]	0.785276	5	7.1417e-10	8.38221e-06
ENSMUSG00000092035	1.69854e-09	-3.46398	-2.39355	-4.53441	3.46991e-07	8.78295	5.2573	Peg10	protein_coding	paternally expressed 10 [Source:MGI Symbol;Acc:MGI:2157785]	0.841303	5	3.93291e-10	4.62274e-06
ENSMUSG00000096145	3.24315e-07	-3.35387	-2.32178	-4.38597	3.46201e-05	6.7761	3.33007	Vkorc1	protein_coding	vitamin K epoxide reductase complex, subunit 1 [Source:MGI Symbol;Acc:MGI:106442]	0.779141	5	1.52563e-07	0.00175417
