# Supplementary material for: Single cell RNA-seq and ATAC-seq analysis of cardiac progenitor cell transition states and lineage settlement
Source: Nat Commun. 2018 Nov 19;9:4877. doi: 10.1038/s41467-018-07307-6 (PMC6242939; doi:10.1038/s41467-018-07307-6)
Supplement: Supplementary file 7 — Supplementary Data 3 [file 41467_2018_7307_MOESM7_ESM.xlsx]

## Sheet: Isl1
geneID	cluster1	cluster2	cluster3	cluster4	cluster5	isl1_dpt
Supplementary Data 3. List of gene correlation analysis results for Nkx2-5+ and Isl1+ cells.
ENSMUSG00000023904	-0.608392	0.78767	0.267578	-0.243684	0.118898	0.209937
ENSMUSG00000059741	0.510679	0.820592	0.21253	-0.0384434	-0.0832204	0.355531
ENSMUSG00000035783	0.218315	0.890148	0.389337	-0.310642	0.148279	0.314878
ENSMUSG00000059588	0.636364	0.0400797	0.23246	0.054754	0.295538	0.0689879
ENSMUSG00000061816	NA	0.513716	0.128707	-0.132586	0.0247215	0.391019
ENSMUSG00000073599	0.664336	0.286998	-0.130863	-0.203669	0.446535	-0.0222839
ENSMUSG00000097487	0.0436713	0.376326	0.0558123	-0.0543444	-0.308221	0.410041
ENSMUSG00000026923	0.167832	0.188329	-0.0839315	-0.227115	0.220044	-0.194957
ENSMUSG00000026921	0.223776	0.069184	-0.062669	0.0635536	0.314603	-0.0553198
ENSMUSG00000038811	0.118881	0.19379	0.134896	-0.0662998	0.275026	0.0248092
ENSMUSG00000026817	-0.533723	0.645638	-0.0951415	-0.130778	-0.387835	0.075117
ENSMUSG00000026814	0.167832	-0.291617	-0.0479863	0.0497708	0.0304126	-0.0800195
ENSMUSG00000061119	0.661998	0.00562742	-0.114105	-0.21414	-0.218066	-0.140293
ENSMUSG00000038763	-0.0522526	0.666831	-0.0822377	0.0208874	-0.153965	0.138679
ENSMUSG00000038729	-0.538062	0.353695	-0.212047	0.00219297	-0.00474916	0.0595347
ENSMUSG00000061086	-0.263403	0.779803	0.274672	0.0926003	0.154278	0.531952
ENSMUSG00000061082	0.168126	0.169264	-0.31417	-0.183186	-0.326228	-0.460219
ENSMUSG00000038677	-0.649032	-0.262096	-0.269821	0.133965	-0.380407	-0.32529
ENSMUSG00000052921	0.440559	0.271966	0.0167031	-0.153012	0.168443	0.106269
ENSMUSG00000026628	0.265734	0.263667	0.0992992	-0.100517	0.0434499	0.0623956
ENSMUSG00000110344	0.130632	0.345253	-0.0488218	-0.0862843	0.0182128	0.24921
ENSMUSG00000026576	-0.27459	0.524446	0.125081	-0.0982154	-0.0992289	0.360092
ENSMUSG00000040752	-0.370914	0.721579	0.169391	-0.153607	-0.063027	0.515533
ENSMUSG00000052727	0.664336	-0.0374384	-0.163636	-0.0531842	-0.170665	0.289314
ENSMUSG00000026430	-0.305699	0.553985	0.304771	0.0539216	NA	0.412748
ENSMUSG00000040723	-0.24915	0.667488	0.0391567	0.0067534	0.217769	0.409004
ENSMUSG00000026418	0.07798	0.747291	0.182626	0.260199	0.194982	0.576556
ENSMUSG00000026414	0.0458947	0.858128	0.337768	0.177642	0.366388	0.517107
ENSMUSG00000040694	NA	0.583909	-0.20711	0.159949	0.0499596	0.325498
ENSMUSG00000040666	-0.63239	0.798374	0.320664	0.17486	-0.176292	0.284087
ENSMUSG00000040659	-0.490934	0.301269	-0.0345117	-0.119544	0.0560144	0.204336
ENSMUSG00000038239	NA	0.63891	0.213058	0.196796	-0.182871	0.375238
ENSMUSG00000038236	-0.514668	0.0156941	0.0967899	-0.337825	-0.43901	-0.464701
ENSMUSG00000038227	-0.32098	-0.0225877	-0.23355	-0.171169	-0.499165	-0.543249
ENSMUSG00000026185	0.515062	0.193103	0.341414	0.387855	-0.144843	0.615963
ENSMUSG00000026163	NA	0.454322	0.121514	0.100557	NA	0.561858
ENSMUSG00000038132	-0.594946	0.135468	0.287658	-0.0295686	0.0653854	0.359574
ENSMUSG00000002100	NA	0.707882	0.195517	0.133823	-0.09759	0.571891
ENSMUSG00000052396	0.262697	-0.0394305	-0.427868	-0.456559	-0.141329	-0.605967
ENSMUSG00000038086	NA	0.772549	0.0893463	0.162725	0.435183	0.357657
ENSMUSG00000029838	-0.461811	-0.443087	-0.106692	-0.0591312	0.219941	0.255167
ENSMUSG00000029826	-0.118881	-0.219219	0.0208308	-0.172895	0.269543	-0.286373
ENSMUSG00000017774	0.517483	0.164473	0.16235	-0.287748	0.310216	0.00670478
ENSMUSG00000031972	0.108172	0.719015	0.123429	-0.109692	-0.0343744	0.357682
ENSMUSG00000031965	-0.394695	0.525031	0.158746	0.00916869	-0.209893	0.0799765
ENSMUSG00000029648	0.531469	0.20305	0.232724	0.101738	0.00974325	-0.0403525
ENSMUSG00000029622	0.111888	0.246902	0.0207939	-0.29134	-0.0436031	-0.180546
ENSMUSG00000067818	-0.18306	0.865025	0.222349	-0.0596862	0.158245	0.352925
ENSMUSG00000031871	0.697024	NA	0.325382	0.148408	0.108999	0.0349958
ENSMUSG00000005583	0.598606	0.109852	0.21473	0.272801	0.0292297	0.534074
ENSMUSG00000029432	0.125874	0.419704	-0.187116	0.0307963	0.18411	0.327639
ENSMUSG00000090053	NA	0.511558	0.273387	0.288197	0.0666732	0.39271
ENSMUSG00000031698	-0.0436713	0.350125	-0.196618	-0.129244	0.215002	0.402302
ENSMUSG00000005397	0.475524	0.278045	0.0454853	-0.105521	-0.0221122	0.00275116
ENSMUSG00000031626	-0.131014	0.62815	0.0378109	0.045931	0.156195	0.4471
ENSMUSG00000029171	0.202797	-0.113799	-0.145469	0.0306616	0.166084	-0.128447
ENSMUSG00000031453	0.238179	-0.219718	-0.286906	0.0438192	0.0383917	-0.0504677
ENSMUSG00000029121	0.570929	-0.361001	-0.109292	-0.0397725	0.0997808	-0.178397
ENSMUSG00000031438	-0.166418	-0.0819266	-0.303773	-0.0340345	-0.36061	-0.383083
ENSMUSG00000031434	-0.565589	0.130902	0.164942	-0.261787	-0.0429335	-0.492542
ENSMUSG00000031326	-0.328676	NA	NA	-0.263908	-0.399358	-0.581331
ENSMUSG00000079243	NA	0.495393	0.160573	0.0131063	NA	0.451225
ENSMUSG00000055027	-0.131014	0.493758	0.284028	0.248654	-0.0314638	0.48851
ENSMUSG00000043008	0.531469	0.335513	-0.0601052	0.0373468	0.497483	0.124525
ENSMUSG00000022895	-0.202797	0.324399	-0.0947675	-0.0383802	-0.504047	-0.121641
ENSMUSG00000034845	0.27972	NA	-0.349908	-0.20017	-0.108898	-0.22401
ENSMUSG00000022803	0.00537557	0.470936	-0.101544	-0.011766	0.14823	0.386166
ENSMUSG00000046768	-0.27972	-0.207387	0.187477	0.0510898	0.0480486	0.0384383
ENSMUSG00000010760	-0.838049	-0.00134974	-0.245651	-0.511138	-0.225363	-0.604951
ENSMUSG00000072944	-0.319718	0.176198	-0.298883	-0.2086	-0.367225	-0.427405
ENSMUSG00000008398	0.202797	0.0953939	0.0611952	-0.214296	-0.209323	-0.0873444
ENSMUSG00000046550	-0.475678	0.0800263	-0.317458	-0.0982511	-0.118411	-0.474382
ENSMUSG00000046470	-0.293706	-0.373296	NA	-0.20229	-0.075076	-0.0761064
ENSMUSG00000022464	-0.48951	0.19803	-0.280508	-0.21281	-0.403514	-0.325483
ENSMUSG00000060600	0.167832	0.612808	-0.0821484	0.127022	0.00663097	0.5136
ENSMUSG00000022346	-0.168126	-0.397088	-0.103745	-0.211334	-0.175262	-0.461978
ENSMUSG00000022091	0.734266	-0.253348	0.0526256	0.0566265	0.156137	-0.0503063
ENSMUSG00000034037	0.654946	0	0.0305453	-0.000833517	0.203575	-0.0799492
ENSMUSG00000001946	0.546411	0.135526	0.283757	NA	0.330744	0.0587007
ENSMUSG00000025813	-0.370914	0.265648	0.293992	-0.0487591	0.00900791	0.315078
ENSMUSG00000001657	-0.376337	-0.135526	-0.282135	-0.209617	-0.350153	-0.521645
ENSMUSG00000025597	0.537452	0.158114	-0.176245	0.0112321	0.316885	0.040113
ENSMUSG00000025491	-0.825175	-0.178404	-0.316231	-0.339885	0.062796	-0.557006
ENSMUSG00000051747	-0.0145023	0.73202	0.359245	0.11999	0.00633315	0.635156
ENSMUSG00000049382	-0.323895	0.157901	-0.239972	0.041026	0.246142	-0.212947
ENSMUSG00000037335	-0.232986	0.152793	-0.573254	-0.26638	0.141798	-0.491796
ENSMUSG00000037306	0.167832	0.4652	-0.0359256	-0.000965482	0.183666	-0.0114513
ENSMUSG00000001349	0.639693	0.805323	0.406364	-0.101562	-0.0680016	0.42073
ENSMUSG00000001288	-0.0933083	-0.102951	-0.0499539	-0.125204	-0.170008	-0.46851
ENSMUSG00000001270	0.0290046	0.704316	0.112565	0.0890026	0.299645	0.351677
ENSMUSG00000001240	0.0839161	NA	-0.136367	-0.0596954	-0.0623045	-0.213373
ENSMUSG00000028977	-0.0436713	0.713427	0.0757823	0.0112184	0.018851	0.327973
ENSMUSG00000028949	-0.166418	0.144899	0.128104	-0.0261038	0.279617	0.293947
ENSMUSG00000004837	0.6655	0.0291462	0.146905	0.0947436	0.0791718	0.13593
ENSMUSG00000028773	-0.00917895	0.690929	0.0762932	0.0310411	0.338859	0.343616
ENSMUSG00000028717	-0.034965	NA	NA	-0.209325	0.317204	-0.226399
ENSMUSG00000063060	0.160839	NA	0.0618555	0.0288572	0.0136378	-0.144207
ENSMUSG00000030946	-0.319718	0.13612	-0.103941	-0.0690225	-0.656121	-0.308443
ENSMUSG00000030934	-0.629371	-0.150618	-0.0861196	-0.0773773	-0.328037	-0.305954
ENSMUSG00000004665	0.27972	0.315271	0.0629051	-0.234385	0.0082512	0.206521
ENSMUSG00000042821	0.0725114	-0.376232	-0.0301401	-0.391677	-0.57573	-0.507339
ENSMUSG00000028518	NA	0.539696	-0.0235867	-0.003115	-0.128227	0.375385
ENSMUSG00000042807	0.746061	0.584329	0.0785179	0.149435	0.0970132	0.229756
ENSMUSG00000016494	0.626971	-0.271052	0.0152343	NA	NA	0.0745698
ENSMUSG00000030782	0.0818635	0.738788	0.203941	-0.186507	0.0515661	0.324475
ENSMUSG00000042757	-0.293726	0	-0.0453156	-0.226062	0.66971	0.300132
ENSMUSG00000004451	0.86014	0.179399	-0.0579981	-0.131916	-0.0325439	0.0278934
ENSMUSG00000054690	0.508977	0.268974	0.0369382	0.177393	-0.257283	0.197774
ENSMUSG00000054640	NA	0.691854	-0.295234	0.0977282	NA	0.451207
ENSMUSG00000028328	0.0281697	0.720059	0.312619	0.107094	0.147769	0.265619
ENSMUSG00000028273	0.211273	0.7496	0.275155	0.231217	0.231254	0.407746
ENSMUSG00000030470	NA	0.545746	0.0567925	-0.00285483	-0.092893	0.576199
ENSMUSG00000016087	0.0909091	0.0711826	-0.0865594	-0.0734989	0.0198425	-0.153355
ENSMUSG00000042155	-0.007798	0.448004	0.111047	0.0790755	0.0629024	0.285021
ENSMUSG00000042106	-0.167832	0.0188938	0.0820215	-0.142922	0.0529311	-0.0727853
ENSMUSG00000030123	0.594406	0.0124652	0.149695	-0.0559407	-0.223316	0.0567809
ENSMUSG00000021998	0.6972	-0.398761	-0.0732782	-0.0398787	-0.09759	0.0590552
ENSMUSG00000021994	-0.138812	0.44651	0.177724	0.0812598	-0.509549	-0.278629
ENSMUSG00000021990	0.166776	0.375555	-0.166335	-0.163603	-0.160525	0.0879732
ENSMUSG00000033910	-0.187221	-0.0330212	0.175969	0.0155021	0.216742	0.40522
ENSMUSG00000019528	0.20979	0.550739	0.419829	0.0535638	0.250287	0.485318
ENSMUSG00000021835	-0.205278	-0.0273638	0.0111204	0.188509	0.263866	-0.141744
ENSMUSG00000021798	-0.131014	0.614057	0.267525	0.0469868	-0.0925184	0.498268
ENSMUSG00000092035	-0.685315	-0.381056	0.0389967	-0.0776458	-0.174943	-0.317017
ENSMUSG00000045659	-0.037629	0.0554118	0.0654197	0.00491538	0.197636	0.266585
ENSMUSG00000069601	-0.022394	0.571429	0.0669971	0.21638	-0.07937	0.44572
ENSMUSG00000021506	-0.477305	NA	NA	-0.116501	-0.614552	-0.535407
ENSMUSG00000021493	0.405594	0.648768	0.270049	0.026004	0.33104	0.427269
ENSMUSG00000007122	-0.638229	0.664631	0.1402	-0.103628	0.0822766	0.3016
ENSMUSG00000045377	0.300699	-0.419017	-0.0937598	-0.418778	0.401681	-0.310488
ENSMUSG00000021373	0.266269	0.597288	0.351967	-0.248882	-0.0842315	0.290954
ENSMUSG00000021313	0.156042	0.386254	0.29864	0.128572	0.177705	0.48526
ENSMUSG00000021285	-0.168126	0.415286	-0.247589	0.0606652	0.0734058	0.0562756
ENSMUSG00000021281	0.52114	-0.158114	0.0265829	-0.183547	-0.0116116	0.0362892
ENSMUSG00000021280	0.402803	-0.304887	-0.054848	-0.148041	0.239539	0.111196
ENSMUSG00000021200	NA	0.689578	0.209421	NA	-0.175673	0.408039
ENSMUSG00000095464	NA	0.62346	-0.125506	0.143512	0.239778	0.431775
ENSMUSG00000045092	0.690158	0.270163	0.145418	-0.0459581	-0.0374568	0.0227201
ENSMUSG00000033060	-0.0436713	0.574323	0.214205	-0.00613425	0.395309	0.347962
ENSMUSG00000024986	-0.167832	0.105375	-0.230125	-0.098241	0.00373917	-0.106718
ENSMUSG00000000938	-0.582464	NA	NA	-0.23667	-0.652278	-0.542615
ENSMUSG00000024803	0.360163	0.737422	0.177297	0.0635818	-0.09759	0.55423
ENSMUSG00000000805	-0.313516	0.00102187	-0.0957231	-0.215146	0.127273	-0.423508
ENSMUSG00000062960	0.230769	0.040762	-0.114079	-0.212904	-0.336201	-0.371155
ENSMUSG00000050953	0.0979021	-0.596847	-0.413617	-0.315192	-0.123606	-0.567468
ENSMUSG00000036644	0.503497	-0.0170839	-0.160393	-0.203998	-0.111045	-0.0570345
ENSMUSG00000000690	-0.455344	NA	-0.186081	-0.122617	-0.348777	-0.530118
ENSMUSG00000000631	0.608392	0.356333	0.0276695	0.0517575	0.0334872	0.395943
ENSMUSG00000048528	-0.0436713	NA	NA	NA	-0.19661	-0.46375
ENSMUSG00000024565	-0.308232	-0.180313	-0.0267771	-0.22773	-0.36779	-0.492392
ENSMUSG00000036523	-0.380291	-0.263713	-0.0710207	-0.246452	-0.399419	-0.470892
ENSMUSG00000000594	-0.187152	0.62069	-0.24044	-0.206723	0.274336	0.298264
ENSMUSG00000048450	-0.638229	-0.303122	0.0538966	-0.24524	-0.26465	-0.503937
ENSMUSG00000024451	0.0979021	0.0829682	0.0129769	-0.167607	0.154716	0.0463339
ENSMUSG00000036242	-0.452284	0.140887	0.0849843	0.0406784	-0.185083	0.130622
ENSMUSG00000000296	-0.756406	-0.147286	0.212688	-0.00366366	0.0258608	-0.279932
ENSMUSG00000048096	0.480384	0.611622	0.167084	-0.0703486	-0.00459781	0.349953
ENSMUSG00000000094	-0.102136	0.316228	NA	-0.295686	-0.613938	-0.510014
ENSMUSG00000024049	NA	0.755052	0.0743591	0.244589	-0.0586803	0.484831
ENSMUSG00000024042	-0.458845	0.143842	0.263603	0.122886	0.449794	0.360475
ENSMUSG00000039952	-0.0211273	0.00394089	-0.11844	-0.0815532	-0.167559	0.0886141
ENSMUSG00000027961	0.257011	0.554612	0.00188559	0.10673	0.0261591	0.373966
ENSMUSG00000027858	0.259828	0.18352	0.154319	0.0227648	0.0193384	0.204324
ENSMUSG00000027777	0.629371	0.550739	0.207117	0.11684	0.160746	0.302849
ENSMUSG00000041959	0.517483	-0.218755	0.061214	-0.208246	0.0951872	-0.254564
ENSMUSG00000027562	0.262697	-0.198644	-0.191138	-0.23869	0.420924	-0.14874
ENSMUSG00000015579	NA	0.504199	0.0300055	0.0237079	0.193277	0.497315
ENSMUSG00000027547	-0.101576	-0.0438424	-0.48769	-0.163301	-0.367762	-0.577403
ENSMUSG00000003518	0.356643	0.229316	0.119154	-0.0688834	0.0698224	0.197542
ENSMUSG00000053702	-0.393042	0.693596	0.21746	-0.0335625	0.161752	0.452751
ENSMUSG00000039405	0.0268778	0.633434	-0.0146888	-0.159012	-0.119576	0.351165
ENSMUSG00000039376	NA	0.724983	0.183164	0.208514	0.292163	0.440701
ENSMUSG00000041688	-0.65149	0.0404439	-0.106262	-0.368868	-0.659282	-0.462889
ENSMUSG00000091898	-0.0826105	0.865131	0.17433	-0.0968261	0.29481	0.429196
ENSMUSG00000027276	-0.153846	-0.00492611	0.271203	0.0103348	-0.33927	0.308652
ENSMUSG00000027247	0.0909091	0.171429	-0.0292934	-0.256834	0.018793	0.0142373
ENSMUSG00000039200	-0.38443	-0.328456	-0.0205844	-0.240321	-0.312013	-0.429515
ENSMUSG00000027217	0.416813	0.585507	0.120147	-0.240581	-0.186734	0.217888
ENSMUSG00000039103	-0.0652602	0.507389	0.0689674	-0.0716944	0.343762	0.445007
ENSMUSG00000027102	-0.358708	NA	-0.101352	0.056009	-0.712925	-0.504996
ENSMUSG00000041361	0.524476	0.100219	-0.0236472	-0.0298119	0.205845	-0.00847079
ENSMUSG00000015053	-0.658495	0.3509	0.213514	-0.0629333	0.362379	-0.231097
ENSMUSG00000018845	0.587453	0.621675	0.336014	0.164076	0.0621027	0.648521
ENSMUSG00000053093	0.301032	0.608181	0.23288	-0.0248883	-0.0889676	0.413246
ENSMUSG00000041012	-0.0699301	0.101651	-0.090217	0.0227506	-0.328503	0.0344454
ENSMUSG00000032946	0.188811	0.295263	0.0414597	-0.0238152	-0.112204	0.13716
ENSMUSG00000018604	-0.450715	-0.157023	-0.323617	-0.270837	-0.376623	-0.31833
ENSMUSG00000032845	NA	0.399332	0.223034	NA	0.0152882	0.301623
ENSMUSG00000020717	0.45184	0.0224202	NA	-0.178468	0.263596	-0.0287596
ENSMUSG00000068614	0.232986	0.82069	0.382836	0.219196	0.217057	0.574975
ENSMUSG00000032679	0.560421	0.418346	-0.0439807	-0.117945	0.117936	-0.0132097
ENSMUSG00000006390	0.048951	0.0919684	-0.15769	-0.318362	0.070741	-0.284083
ENSMUSG00000006386	0.27972	0.110364	0.0311017	0.0140866	0.260491	0.237076
ENSMUSG00000044629	0.514887	0.161829	-0.0391872	-0.0782212	-0.0302337	-0.131662
ENSMUSG00000018340	0.27972	0.523645	0.0823807	-0.0267405	-0.0181845	0.1813
ENSMUSG00000006360	-0.128134	0.605179	-0.116026	-0.191795	0.198724	0.223656
ENSMUSG00000018339	-0.00699301	0.670443	0.171044	0.0158277	-0.346398	0.221869
ENSMUSG00000018334	0.0559441	0.318262	0.163167	0.0952358	-0.146272	0.059344
ENSMUSG00000032609	-0.0436713	0.539104	0.0105396	-0.0533097	0.0276325	0.380277
ENSMUSG00000006311	-0.374782	0.0451754	NA	-0.386038	-0.161484	-0.48506
ENSMUSG00000068566	0.174825	0.476355	-0.0589767	-0.269586	0.523786	0.139566
ENSMUSG00000044562	0.573427	0.0392353	-0.203131	0.0895761	0.239778	-0.00418134
ENSMUSG00000020542	0.218357	0.263547	0.294477	0.131839	0.0956345	0.544439
ENSMUSG00000018217	0.129597	-0.0940491	0.0213995	-0.143093	0.177998	-0.196488
ENSMUSG00000056492	0.725045	NA	0.0194737	-0.268511	0.117285	-0.0876975
ENSMUSG00000020475	NA	0.696902	0.0902339	-0.0216697	0.23379	0.346051
ENSMUSG00000020469	-0.633819	0.844335	0.241185	0.104399	-0.0411639	0.486025
ENSMUSG00000020407	0.570437	-0.0804302	-0.145753	-0.190858	-0.0448808	0.0427893
ENSMUSG00000032387	-0.316776	0.337112	0.114211	-0.0445095	-0.297173	-0.188691
ENSMUSG00000032366	0.454545	0.813793	0.345226	0.047181	0.27395	0.351451
ENSMUSG00000020357	0.447552	-0.140126	0.00780474	-0.13454	0.314166	-0.0572219
ENSMUSG00000020186	-0.132867	0.668473	-0.114433	0.0106123	-0.0878533	0.110782
ENSMUSG00000020155	-0.305699	0.545061	0.0363882	-0.00447059	0.115334	0.379149
ENSMUSG00000032085	0.268292	0.646798	0.187103	-0.176575	-0.115194	0.248517
ENSMUSG00000032060	0.218357	0.895685	0.202751	-0.303358	0.0912666	0.333038
ENSMUSG00000044033	-0.156042	0.503448	0.279015	0.159598	0.181384	0.583768

## Sheet: Nkx2-5
geneID	cluster1	cluster2	cluster3	nkx_dpt
ENSMUSG00000023904	0.262693	0.524204	0.320092	0.688576
ENSMUSG00000023902	-0.361272	0.212523	0.0104114	-0.560517
ENSMUSG00000023830	0.564032	0.140186	0.0876373	0.629925
ENSMUSG00000047786	0.413311	-0.297358	0.310112	0.0211521
ENSMUSG00000059741	0.440574	0.717348	0.0620437	0.745952
ENSMUSG00000035783	0.674641	0.38342	0.0111924	0.722088
ENSMUSG00000061816	0.275163	0.540642	0.273385	0.759742
ENSMUSG00000035458	0.00511689	0.631929	0.147195	0.665282
ENSMUSG00000059325	0.305562	0.479758	0.122264	0.672606
ENSMUSG00000073557	0.215153	0.182411	-0.0478074	0.435575
ENSMUSG00000035274	0.38323	-0.421453	0.284474	-0.0494953
ENSMUSG00000097487	0.260752	0.0359864	0.0652624	0.722886
ENSMUSG00000061462	0.0316625	0.447249	0.308581	0.616113
ENSMUSG00000011179	-0.447563	0.0161394	-0.0956966	-0.59907
ENSMUSG00000011148	NA	0.442524	-0.0183199	0.634153
ENSMUSG00000023092	0.214126	0.29918	-0.0508252	0.430756
ENSMUSG00000026888	0.37392	0.273747	0.273739	0.646284
ENSMUSG00000026817	0.469328	0.501323	0.273425	0.708934
ENSMUSG00000038763	0.228044	0.647144	0.393577	0.656188
ENSMUSG00000038729	0.50675	-0.0238197	0.0831891	0.483978
ENSMUSG00000061086	0.295039	0.344062	0.206082	0.751293
ENSMUSG00000038668	0.304875	-0.12955	-0.0325241	-0.138744
ENSMUSG00000038663	0.0812563	0.547491	0.276862	0.717879
ENSMUSG00000026674	0.372291	-0.199275	0.20039	-0.00703086
ENSMUSG00000052920	0.299957	0.506087	0.114701	0.640742
ENSMUSG00000026610	-0.0915495	0.339522	0.149951	0.605594
ENSMUSG00000026586	0.397156	-0.191627	0.184264	0.0456418
ENSMUSG00000110344	0.423444	0.10659	0.156259	0.582489
ENSMUSG00000026576	0.430505	0.164177	0.138474	0.740473
ENSMUSG00000026564	0.301811	0.335753	0.210148	0.569453
ENSMUSG00000040752	0.575649	0.353027	0.0340098	0.800866
ENSMUSG00000052727	0.209954	-0.0708614	0.0416192	0.590152
ENSMUSG00000026447	-0.323039	0.321917	-0.0666733	0.491895
ENSMUSG00000026430	0.293842	0.256005	0.111651	0.717053
ENSMUSG00000040723	0.158805	0.199522	0.106221	0.703025
ENSMUSG00000026418	0.621321	0.36404	0.532622	0.850098
ENSMUSG00000026414	0.398109	0.641339	0.381381	0.804758
ENSMUSG00000040694	-0.00848534	0.566376	0.174281	0.721203
ENSMUSG00000040666	-0.113139	0.703065	0.402666	0.726074
ENSMUSG00000040653	0.173354	-0.0720021	0.222013	0.647387
ENSMUSG00000026335	0.15863	0.701101	0.127859	0.684481
ENSMUSG00000026308	NA	0.236655	0.304654	0.623695
ENSMUSG00000038244	0.159945	0.265066	0.293619	0.7062
ENSMUSG00000038239	0.307247	0.376922	0.214066	0.752133
ENSMUSG00000038235	0.0123149	-0.252003	-0.129152	0.490009
ENSMUSG00000052512	0.190073	0.184853	0.164151	0.447679
ENSMUSG00000026208	-0.16621	0.52588	0.547337	0.680101
ENSMUSG00000040483	-0.329457	-0.0675601	-0.105134	-0.561873
ENSMUSG00000026185	0.386456	-0.32545	0.174928	0.661987
ENSMUSG00000038156	0.481664	0.14054	0.0754196	0.556591
ENSMUSG00000026163	0.12027	0.155758	0.388875	0.754204
ENSMUSG00000038132	-0.218712	0.0575429	0.262744	0.597929
ENSMUSG00000026124	-0.463702	-0.070469	0.201758	-0.317856
ENSMUSG00000002100	0.218182	0.350465	0.110914	0.789174
ENSMUSG00000038086	0.32237	0.65121	0.262225	0.735157
ENSMUSG00000052374	0.452837	0.60779	0.0762639	0.756102
ENSMUSG00000026043	0.55394	-0.338887	0.254405	0.0116196
ENSMUSG00000029838	0.571543	-0.321269	-0.00956658	0.0215789
ENSMUSG00000029826	-0.425157	0.144046	0.0126737	-0.477558
ENSMUSG00000031972	-0.320557	0.749637	0.0181531	0.46498
ENSMUSG00000031965	-0.0910528	-0.141683	-0.0222509	0.206769
ENSMUSG00000067818	0.465378	0.308119	0.251483	0.724658
ENSMUSG00000031880	NA	0.263256	0.315941	0.717005
ENSMUSG00000005583	-0.307264	-0.285324	0.364032	0.618756
ENSMUSG00000029467	-0.177734	0.212926	0.205513	0.58697
ENSMUSG00000055723	-0.020554	-0.0478654	-0.0912993	-0.317905
ENSMUSG00000029432	0.357166	0.40502	0.400418	0.774974
ENSMUSG00000090053	0.328056	0.242569	-0.00116831	0.63465
ENSMUSG00000031698	0.112682	0.272267	0.397805	0.670106
ENSMUSG00000043639	0.199051	0.105944	0.128488	0.525234
ENSMUSG00000031626	0.567648	0.465893	0.246446	0.787142
ENSMUSG00000029167	0.108001	0.078148	0.337343	0.695565
ENSMUSG00000031458	0.304544	-0.00247588	0.207396	0.508391
ENSMUSG00000031434	-0.359731	0.249431	-0.073564	-0.501794
ENSMUSG00000079243	0.436585	0.286129	0.332583	0.7359
ENSMUSG00000031216	-0.221746	-0.164752	0.118428	-0.523008
ENSMUSG00000031073	-0.819742	-0.219255	-0.110384	-0.640093
ENSMUSG00000055027	0.433787	0.24921	0.498746	0.777988
ENSMUSG00000046876	0.160386	0.165183	0.0993314	0.505655
ENSMUSG00000034898	0.232161	0.45604	0.283889	0.667698
ENSMUSG00000022803	0.589173	0.555622	0.250653	0.77866
ENSMUSG00000046794	-0.274605	0.347609	0.195557	0.565529
ENSMUSG00000022799	0.317053	0.078134	0.236443	0.571525
ENSMUSG00000022790	0.419447	-0.10349	0.104067	-0.449101
ENSMUSG00000010760	0.049277	-0.120918	-0.121605	-0.633831
ENSMUSG00000022708	0.407938	0.204548	0.0728671	0.531727
ENSMUSG00000060913	0.341521	0.224029	0.268093	0.782607
ENSMUSG00000046550	-0.0134387	0.17096	0.0158003	-0.48322
ENSMUSG00000072720	0.327202	0.418706	0.0514284	0.699534
ENSMUSG00000022490	0.332383	0.41088	0.177304	0.609489
ENSMUSG00000022483	0.448849	0.45899	-0.0779842	0.710869
ENSMUSG00000008136	-0.44612	0.302272	0.163471	0.478909
ENSMUSG00000034353	0.232161	0.209347	0.217582	0.632281
ENSMUSG00000060600	-0.0415347	0.541279	0.260191	0.754277
ENSMUSG00000022358	0.194082	0.0543887	0.133747	0.697957
ENSMUSG00000022309	0.66923	0.0412248	0.231248	0.582689
ENSMUSG00000060572	0.238417	-0.25358	0.2053	0.125058
ENSMUSG00000034295	-0.432593	0.106372	0.220091	0.492545
ENSMUSG00000022215	0.0696483	0.0971566	0.295136	0.626955
ENSMUSG00000096472	0.340945	0.30558	-0.0560191	0.454387
ENSMUSG00000022199	0.26161	-0.0459142	0.194475	0.568259
ENSMUSG00000058056	-0.0197694	0.474942	-0.0868505	0.587729
ENSMUSG00000010066	-0.213226	0.236615	0.332944	0.657946
ENSMUSG00000013936	0.309935	0.707989	-0.200485	0.604747
ENSMUSG00000072244	-0.289589	0.0120434	-0.136467	-0.477867
ENSMUSG00000060260	-0.716	0.160837	-0.0484877	-0.440228
ENSMUSG00000060206	0.681612	-0.152348	-0.026608	0.0787619
ENSMUSG00000025813	-0.0829276	0.525453	-0.0303959	0.424002
ENSMUSG00000060187	0.135115	0.707709	NA	0.669872
ENSMUSG00000025791	0.573946	0.37992	0.119747	0.509719
ENSMUSG00000025790	-0.202156	0.611318	0.232785	0.505261
ENSMUSG00000037664	0.312066	0.476138	-0.000707496	0.518045
ENSMUSG00000001663	0.33827	0.29887	0.177071	0.602626
ENSMUSG00000001604	0.260658	0.165666	0.0507649	0.659798
ENSMUSG00000025591	-0.281555	-0.00430745	0.105215	-0.512838
ENSMUSG00000001552	0.0805352	-0.119741	0.0292874	0.535051
ENSMUSG00000025491	0.364032	0.0340187	-0.2331	-0.607833
ENSMUSG00000051747	0.578723	0.57005	0.457286	0.872943
ENSMUSG00000049422	0.00304657	0.35439	0.190529	0.686168
ENSMUSG00000049382	0.054809	0.274644	-0.0427393	-0.229818
ENSMUSG00000037335	-0.126104	-0.181348	0.240864	-0.487128
ENSMUSG00000001349	0.119923	0.379578	0.153028	0.73571
ENSMUSG00000025255	0.0887623	-0.252006	-0.120464	-0.00267418
ENSMUSG00000001270	-0.17426	0.463896	-0.00884824	0.609288
ENSMUSG00000051456	NA	0.369247	0.369869	0.663839
ENSMUSG00000025104	0.252031	-0.418045	-0.0823899	-0.247653
ENSMUSG00000051331	0.0907508	0.372273	0.246793	0.595768
ENSMUSG00000037012	0.0615524	0.299368	0.135021	0.610083
ENSMUSG00000028977	0.121552	0.0758294	0.0277756	0.645126
ENSMUSG00000028949	0.235224	0.0685002	0.302375	0.419364
ENSMUSG00000004951	0.0288531	0.406565	-0.0581365	0.724176
ENSMUSG00000063275	0.381563	0.423171	0.0401836	0.534295
ENSMUSG00000028883	0.384811	0.0683046	0.158873	0.42325
ENSMUSG00000004885	0.352316	-0.343772	-0.173769	0.0817203
ENSMUSG00000028773	0.062238	0.329747	0.281111	0.71513
ENSMUSG00000078937	-0.11155	0.428216	0.0683896	0.647941
ENSMUSG00000042942	-0.588096	-0.155076	-0.0687962	-0.511527
ENSMUSG00000042812	0.127685	-0.310796	0.0093649	-0.646883
ENSMUSG00000028518	0.213876	0.200188	0.25039	0.646287
ENSMUSG00000030785	0.127688	0.691035	0.15492	0.732091
ENSMUSG00000030782	0.203937	0.104544	-0.093191	0.542838
ENSMUSG00000054640	0.465126	0.53573	0.193661	0.779598
ENSMUSG00000016386	0.258459	0.594101	0.409698	0.66657
ENSMUSG00000028328	-0.0236237	0.59848	0.294422	0.63345
ENSMUSG00000042613	0.0953323	0.125128	0.171136	0.494677
ENSMUSG00000028289	0.404254	0.43585	-0.0306347	0.607564
ENSMUSG00000028278	-0.388468	0.140784	0.0505009	0.402685
ENSMUSG00000028273	-0.00909211	0.41185	0.0367599	0.5925
ENSMUSG00000030551	0.691065	-0.399839	-0.36313	0.0574976
ENSMUSG00000030470	0.242581	0.279689	0.397432	0.813286
ENSMUSG00000004085	-0.222808	0.545377	-0.020997	0.560315
ENSMUSG00000004044	0.264925	0.375567	0.158657	0.51086
ENSMUSG00000019880	-0.631526	-0.294255	0.0588249	-0.446516
ENSMUSG00000042155	0.120968	-0.0321865	0.144187	0.603631
ENSMUSG00000019787	NA	0.679732	0.315941	0.71696
ENSMUSG00000019528	-0.499473	0.491249	0.321485	0.744527
ENSMUSG00000021838	0.4143	0.124113	0.0488908	0.597155
ENSMUSG00000045763	-0.164427	-0.196399	0.081239	-0.588724
ENSMUSG00000021798	0.606839	0.349526	0.452452	0.81598
ENSMUSG00000021702	0.185729	0.569205	-0.0338693	0.715357
ENSMUSG00000069662	0.611067	-0.445061	-0.0364514	-0.452413
ENSMUSG00000069601	0.488008	0.312986	0.238559	0.778261
ENSMUSG00000045636	-0.427985	0.220834	0.152619	0.519348
ENSMUSG00000021614	0.380501	0.427303	0.243917	0.552722
ENSMUSG00000021493	0.813671	0.298643	0.435951	0.736499
ENSMUSG00000007122	0.395229	0.415506	0.308117	0.732645
ENSMUSG00000069378	-0.0160844	0.214808	-0.0161577	-0.288485
ENSMUSG00000045377	0.152701	-0.0861939	-0.0256558	-0.302119
ENSMUSG00000021373	-0.28741	0.469734	0.252691	0.610623
ENSMUSG00000021313	0.150242	0.409033	0.221561	0.691855
ENSMUSG00000045215	0.299253	-0.195593	0.13738	-0.0200044
ENSMUSG00000021221	-0.252696	0.165228	0.294022	0.467178
ENSMUSG00000021200	-0.208945	0.447632	0.131108	0.77087
ENSMUSG00000095464	0.520842	0.430755	0.142862	0.697081
ENSMUSG00000021196	-0.168702	0.719824	0.156732	0.415959
ENSMUSG00000071317	0.463091	0.22737	0.0950123	0.572568
ENSMUSG00000033060	0.253077	0.217497	0.256274	0.596944
ENSMUSG00000021057	-0.20225	-0.202937	-0.0432631	0.422238
ENSMUSG00000048915	0.346293	-0.487005	-0.105417	-0.283954
ENSMUSG00000024937	0.168726	0.468374	0.108415	0.623103
ENSMUSG00000071235	-0.71243	-0.0858333	NA	-0.612357
ENSMUSG00000024803	0.653113	0.300862	0.153683	0.814914
ENSMUSG00000000805	-0.109885	0.630785	-0.273141	-0.329437
ENSMUSG00000000753	0.360551	-0.123974	0.162691	-0.0341323
ENSMUSG00000050966	0.106456	0.0267339	0.00768547	-0.337908
ENSMUSG00000036602	0.221593	-0.0974947	0.41449	0.0478763
ENSMUSG00000000631	0.241428	0.1337	0.177023	0.496263
ENSMUSG00000036564	-0.0100537	0.113116	0.138943	0.580439
ENSMUSG00000024565	-0.348055	-0.155411	-0.213212	-0.627944
ENSMUSG00000000594	0.430958	0.474099	0.13431	0.677622
ENSMUSG00000048450	0.0121212	-0.219926	-0.0973573	-0.618298
ENSMUSG00000048285	-0.31941	-0.291653	-0.0823129	-0.546318
ENSMUSG00000036242	0.0599868	0.0460609	0.443508	0.532103
ENSMUSG00000050503	0.439239	0.398786	0.0236974	0.567846
ENSMUSG00000024236	-0.387231	0.347399	0.0401767	0.548419
ENSMUSG00000000253	0.186203	0.314895	-0.0799411	0.559389
ENSMUSG00000048096	-0.0053315	0.240882	0.323705	0.679752
ENSMUSG00000024063	0.0553469	0.285664	-0.0429986	0.52788
ENSMUSG00000050315	0.174264	0.201917	0.458978	0.742667
ENSMUSG00000024049	0.443341	0.487375	0.0562222	0.754817
ENSMUSG00000024042	-0.399486	-0.300777	0.0636939	0.362894
ENSMUSG00000024008	-0.0675171	0.368465	-0.139085	0.520207
ENSMUSG00000039952	0.457359	-0.0208316	0.00369247	0.493826
ENSMUSG00000027961	0.297816	0.247948	0.235078	0.582506
ENSMUSG00000015968	0.159715	-0.0673562	0.143492	0.616967
ENSMUSG00000015932	-0.0101449	0.551182	0.192962	0.571591
ENSMUSG00000074218	0.174263	0.548311	0.23094	0.743422
ENSMUSG00000062209	-0.0948145	0.573595	-0.0498527	0.588974
ENSMUSG00000039782	-0.387277	0.197296	0.227756	0.487819
ENSMUSG00000039770	-0.00194588	0.142674	0.00414759	0.562666
ENSMUSG00000027777	0.153096	0.503628	-0.120467	0.31688
ENSMUSG00000062078	0.0793149	0.596261	-0.0119659	0.663684
ENSMUSG00000041959	0.0492754	-0.177169	-0.222072	-0.443512
ENSMUSG00000041957	0.0242996	0.494961	0.054832	0.428923
ENSMUSG00000015619	0.0174773	-0.225716	0.14719	-0.521302
ENSMUSG00000027562	-0.690654	0.332889	-0.358538	-0.509028
ENSMUSG00000015579	0.541037	0.165877	0.170571	0.639723
ENSMUSG00000053819	0.188208	0.0918716	0.143735	0.606531
ENSMUSG00000027478	-0.538076	0.0293375	-0.145474	-0.535765
ENSMUSG00000041731	0.386197	0.496191	0.278468	0.596364
ENSMUSG00000053702	0.6795	0.626313	0.568385	0.862585
ENSMUSG00000039405	0.392246	0.303141	-0.0552616	0.591937
ENSMUSG00000039376	0.352031	0.0774797	0.117886	0.793505
ENSMUSG00000091898	0.29908	0.597114	0.0610738	0.74162
ENSMUSG00000027293	-0.0172349	0.206599	-0.139352	0.402112
ENSMUSG00000027276	0.221314	0.0865705	0.299775	0.688141
ENSMUSG00000027247	0.0849172	0.328609	0.172856	0.491589
ENSMUSG00000027217	0.321455	-0.0312607	-0.333361	0.461583
ENSMUSG00000039176	-0.210408	0.253493	-0.0116562	-0.413277
ENSMUSG00000041476	0.239065	0.740748	0.232845	0.762998
ENSMUSG00000027177	-0.0873514	-0.100019	0.0810839	0.483138
ENSMUSG00000039126	0.429175	0.455829	0.0593036	0.619279
ENSMUSG00000039103	0.424696	0.498335	0.201847	0.707366
ENSMUSG00000041329	0.142321	0.16532	0.156844	0.529759
ENSMUSG00000015053	-0.571874	-0.364348	-0.0295022	-0.614848
ENSMUSG00000018845	0.39336	-0.149321	0.323947	0.794896
ENSMUSG00000006800	0.2269	0.016726	0.12243	0.114705
ENSMUSG00000053093	0.720688	0.59387	0.115784	0.77592
ENSMUSG00000044938	0.184898	0.328599	0.243147	0.684865
ENSMUSG00000032845	0.281861	0.366791	0.417431	0.707036
ENSMUSG00000006567	0.273911	0.3608	0.217255	0.653971
ENSMUSG00000068699	0.388824	0.179373	0.183568	0.512784
ENSMUSG00000068614	0.580975	0.619824	0.0838631	0.797725
ENSMUSG00000032648	-0.045901	0.390001	0.166387	0.614949
ENSMUSG00000018340	0.276591	0.218134	0.130694	0.5022
ENSMUSG00000006360	0.274884	0.466234	0.208994	0.727197
ENSMUSG00000018339	0.436049	0.432852	0.360199	0.744471
ENSMUSG00000006356	-0.332235	0.410996	0.0617144	0.524792
ENSMUSG00000032609	-0.00579477	-0.0968966	0.263447	0.547459
ENSMUSG00000068566	0.176606	0.183898	0.0871326	0.267513
ENSMUSG00000020589	0.262374	0.324881	-0.170469	0.545001
ENSMUSG00000020542	0.33803	0.0309912	0.390086	0.752712
ENSMUSG00000018217	0.23927	-0.428227	0.137745	-0.407861
ENSMUSG00000006221	-0.097397	0.521498	0.383333	0.783225
ENSMUSG00000020475	-0.0388438	0.223816	0.183379	0.774867
ENSMUSG00000020469	-0.123057	0.559976	0.207414	0.643476
ENSMUSG00000032394	0.566837	-0.438638	0.00335292	-0.153014
ENSMUSG00000032366	0.242556	0.710151	0.137318	0.709387
ENSMUSG00000044338	0.0705625	0.0483776	0.0290532	-0.551403
ENSMUSG00000032291	0.252472	0.206351	0.196653	-0.252284
ENSMUSG00000070526	0.497019	-0.108602	-0.318035	0.0337116
ENSMUSG00000032228	0.0202905	-0.150285	0.133411	-0.182788
ENSMUSG00000020186	0.0513902	0.208742	-0.258705	0.543643
ENSMUSG00000020155	-0.039763	0.396299	0.415502	0.641215
ENSMUSG00000032085	0.0382278	0.485614	0.127947	0.602714
ENSMUSG00000032060	0.300946	0.672473	0.209642	0.696733
ENSMUSG00000044033	0.45054	0.528814	0.478081	0.826418
ENSMUSG00000032024	0.440142	-0.0728955	0.266833	-0.152882
ENSMUSG00000032010	-0.00118601	-0.0475041	0.059311	0.553754
