# Supplementary material for: Single cell RNA-seq and ATAC-seq analysis of cardiac progenitor cell transition states and lineage settlement
Source: Nat Commun. 2018 Nov 19;9:4877. doi: 10.1038/s41467-018-07307-6 (PMC6242939; doi:10.1038/s41467-018-07307-6)
Supplement: Supplementary file 8 — Supplementary Data 4 [file 41467_2018_7307_MOESM8_ESM.xlsx]

## Sheet: cluster1
Supplementary Data 4. List of specific peaks obtained by scATAC-seq in each cluster.
peak_id	peak_chr	peak_start	peak_end	genomic_location	distance	query	gene_id	gene_name	gene_type	scABC_qvalue
aggregated_scATAC_peak_61	chr1	7777209	7778474	upstream	47277	1	ENSMUSG00000103557	Gm38216	processed_pseudogene	3.72507e-05
aggregated_scATAC_peak_141	chr1	12692146	12693117	overlapStart	355	0	ENSMUSG00000016918	Sulf1	protein_coding	5.84533e-07
aggregated_scATAC_peak_229	chr1	15451686	15452079	NA	NA	0,1	NA	NA	NA	2.74631e-05
aggregated_scATAC_peak_243	chr1	16229654	16229899	PeakInsideFeature	1270	0	ENSMUSG00000100868	Gm28095	antisense_RNA	3.24912e-06
aggregated_scATAC_peak_246	chr1	16248733	16249550	upstream	4450	0	ENSMUSG00000089982	Gm7568	antisense_RNA	4.90621e-06
aggregated_scATAC_peak_266	chr1	17642231	17642670	upstream	1369	0	ENSMUSG00000100053	Gm28154	antisense_RNA	9.65963e-08
aggregated_scATAC_peak_267	chr1	17726855	17727870	overlapStart	284	0	ENSMUSG00000085125	Gm16070	antisense_RNA	4.14903e-05
aggregated_scATAC_peak_357	chr1	24195890	24196582	PeakInsideFeature	18626	1	ENSMUSG00000026147	Col9a1	protein_coding	3.84109e-06
aggregated_scATAC_peak_374	chr1	25829815	25830851	overlapStart	324	0	ENSMUSG00000104516	Gm9884	TEC	1.13765e-06
aggregated_scATAC_peak_375	chr1	28025712	28026061	downstream	35976	1	ENSMUSG00000101372	Gm19028	processed_pseudogene	4.49499e-05
aggregated_scATAC_peak_376	chr1	28465204	28465404	NA	NA	0,1	NA	NA	NA	8.94385e-05
aggregated_scATAC_peak_380	chr1	30415026	30415501	NA	NA	0,1	NA	NA	NA	3.82473e-05
aggregated_scATAC_peak_521	chr1	36161318	36161558	upstream	17125	1	ENSMUSG00000098752	Mir6897	miRNA	2.40246e-05
aggregated_scATAC_peak_621	chr1	38248088	38248386	downstream	12817	1	ENSMUSG00000085391	Gm16150	antisense_RNA	3.928e-05
aggregated_scATAC_peak_638	chr1	38488771	38489248	downstream	1491	0	ENSMUSG00000102984	Gm34727	processed_pseudogene	6.61775e-05
aggregated_scATAC_peak_639	chr1	38545321	38546207	NA	NA	0,1	NA	NA	NA	5.74761e-05
aggregated_scATAC_peak_708	chr1	39688609	39688891	PeakInsideFeature	32247	1	ENSMUSG00000057173	Rfx8	protein_coding	1.3737e-05
aggregated_scATAC_peak_765	chr1	41058912	41059303	NA	NA	0,1	NA	NA	NA	1.15105e-06
aggregated_scATAC_peak_872	chr1	47019301	47019784	upstream	48246	1	ENSMUSG00000101921	Gm28825	processed_pseudogene	4.45531e-05
aggregated_scATAC_peak_877	chr1	50250445	50251234	upstream	28320	1	ENSMUSG00000098249	Gm27330	misc_RNA	7.97662e-06
aggregated_scATAC_peak_896	chr1	51509040	51509546	downstream	20076	1	ENSMUSG00000103424	Gm37535	TEC	3.25196e-05
aggregated_scATAC_peak_1261	chr1	62766668	62767202	upstream	42367	1	ENSMUSG00000103032	Gm37121	TEC	2.09684e-05
aggregated_scATAC_peak_1264	chr1	62779892	62780597	upstream	29058	1	ENSMUSG00000103032	Gm37121	TEC	1.43075e-09
aggregated_scATAC_peak_1269	chr1	62821480	62822330	PeakInsideFeature	10465	1	ENSMUSG00000100426	Gm4208	lincRNA	1.33194e-08
aggregated_scATAC_peak_1311	chr1	63621871	63622176	downstream	6056	1	ENSMUSG00000115378	FAM237A	protein_coding	1.29477e-05
aggregated_scATAC_peak_1368	chr1	64878744	64879369	NA	NA	0,1	NA	NA	NA	2.7371e-05
aggregated_scATAC_peak_1476	chr1	72020477	72020694	upstream	15391	1	ENSMUSG00000101848	4933417E11Rik	lincRNA	6.44293e-05
aggregated_scATAC_peak_1553	chr1	73363401	73364417	upstream	28337	1	ENSMUSG00000098697	Gm27315	misc_RNA	5.21287e-06
aggregated_scATAC_peak_1564	chr1	73635559	73636133	NA	NA	0,1	NA	NA	NA	4.29253e-06
aggregated_scATAC_peak_1587	chr1	73948559	73949163	NA	NA	0,1	NA	NA	NA	3.12493e-09
aggregated_scATAC_peak_1591	chr1	73972650	73973180	NA	NA	0,1	NA	NA	NA	1.57727e-06
aggregated_scATAC_peak_1690	chr1	75040416	75040834	NA	NA	0,1	NA	NA	NA	6.51335e-05
aggregated_scATAC_peak_1691	chr1	75041216	75041870	NA	NA	0,1	NA	NA	NA	6.37382e-06
aggregated_scATAC_peak_1791	chr1	77300805	77301244	NA	NA	0,1	NA	NA	NA	5.75475e-09
aggregated_scATAC_peak_1793	chr1	77336967	77337407	NA	NA	0,1	NA	NA	NA	1.42997e-06
aggregated_scATAC_peak_1794	chr1	77338223	77338725	NA	NA	0,1	NA	NA	NA	2.65962e-06
aggregated_scATAC_peak_1900	chr1	82112429	82113040	downstream	7554	1	ENSMUSG00000103571	Gm37114	TEC	1.52761e-07
aggregated_scATAC_peak_1901	chr1	82221092	82221342	upstream	11895	1	ENSMUSG00000022591	Gm9747	protein_coding	3.81253e-05
aggregated_scATAC_peak_1982	chr1	85906955	85907199	PeakInsideFeature	12796	1	ENSMUSG00000026223	Itm2c	protein_coding	7.63206e-06
aggregated_scATAC_peak_2150	chr1	88612714	88613644	upstream	39906	1	ENSMUSG00000104057	Gm38130	TEC	2.46014e-06
aggregated_scATAC_peak_2195	chr1	89166814	89167155	NA	NA	0,1	NA	NA	NA	3.85074e-05
aggregated_scATAC_peak_2279	chr1	90166505	90167304	downstream	13276	1	ENSMUSG00000100850	4930434B07Rik	lincRNA	1.86582e-07
aggregated_scATAC_peak_2294	chr1	90352812	90354051	downstream	26120	1	ENSMUSG00000098368	Gm27648	rRNA	1.0392e-08
aggregated_scATAC_peak_2303	chr1	90504423	90505181	upstream	15694	1	ENSMUSG00000103292	Gm35048	TEC	2.13539e-06
aggregated_scATAC_peak_2318	chr1	90743839	90744438	NA	NA	0,1	NA	NA	NA	2.01932e-06
aggregated_scATAC_peak_2347	chr1	91109013	91110252	upstream	35457	1	ENSMUSG00000070732	Rbm44	protein_coding	1.0886e-05
aggregated_scATAC_peak_2388	chr1	91718032	91718456	NA	NA	0,1	NA	NA	NA	7.49789e-06
aggregated_scATAC_peak_2395	chr1	91770151	91771124	upstream	30823	1	ENSMUSG00000007805	Twist2	protein_coding	1.55e-05
aggregated_scATAC_peak_2401	chr1	91830581	91831217	downstream	8384	1	ENSMUSG00000101414	Gm29101	sense_intronic	1.8314e-05
aggregated_scATAC_peak_2407	chr1	91873614	91874000	upstream	42453	1	ENSMUSG00000102745	Gm37600	TEC	2.66714e-06
aggregated_scATAC_peak_2421	chr1	92083940	92084520	NA	NA	0,1	NA	NA	NA	8.94563e-06
aggregated_scATAC_peak_2423	chr1	92130433	92130912	NA	NA	0,1	NA	NA	NA	2.74491e-05
aggregated_scATAC_peak_2431	chr1	92316148	92316856	upstream	8008	1	ENSMUSG00000101265	Gm29099	lincRNA	4.41586e-05
aggregated_scATAC_peak_2433	chr1	92337389	92337818	downstream	13094	1	ENSMUSG00000101265	Gm29099	lincRNA	7.52034e-05
aggregated_scATAC_peak_2436	chr1	92397813	92399139	downstream	32056	1	ENSMUSG00000101522	Gm7837	processed_pseudogene	2.71064e-08
aggregated_scATAC_peak_2437	chr1	92437412	92438246	upstream	7297	1	ENSMUSG00000101522	Gm7837	processed_pseudogene	1.22169e-06
aggregated_scATAC_peak_2508	chr1	93618015	93618481	upstream	16945	1	ENSMUSG00000100927	Gm28536	antisense_RNA	7.63984e-06
aggregated_scATAC_peak_2614	chr1	106465482	106465682	downstream	25982	1	ENSMUSG00000099604	Gm6651	processed_pseudogene	4.27522e-06
aggregated_scATAC_peak_2639	chr1	108239095	108239495	NA	NA	0,1	NA	NA	NA	1.02177e-06
aggregated_scATAC_peak_2644	chr1	111586382	111586672	NA	NA	0,1	NA	NA	NA	5.2505e-06
aggregated_scATAC_peak_2687	chr1	118795873	118796256	upstream	14072	1	ENSMUSG00000100040	Gm28467	processed_pseudogene	4.88228e-05
aggregated_scATAC_peak_2688	chr1	118804343	118805004	upstream	5462	1	ENSMUSG00000100040	Gm28467	processed_pseudogene	5.0715e-06
aggregated_scATAC_peak_2692	chr1	118901964	118902563	NA	NA	0,1	NA	NA	NA	4.73123e-05
aggregated_scATAC_peak_2693	chr1	118904917	118905542	upstream	48990	1	ENSMUSG00000098273	Mir6346	miRNA	3.23715e-09
aggregated_scATAC_peak_2720	chr1	119236734	119237300	downstream	5736	1	ENSMUSG00000100767	Gm3508	processed_pseudogene	4.37968e-08
aggregated_scATAC_peak_2806	chr1	120739621	120739896	upstream	18685	1	ENSMUSG00000101386	Gm29346	lincRNA	6.14761e-05
aggregated_scATAC_peak_2822	chr1	121371490	121371690	upstream	11690	1	ENSMUSG00000101791	2210011K15Rik	lincRNA	5.57242e-06
aggregated_scATAC_peak_2901	chr1	127610474	127610760	NA	NA	0,1	NA	NA	NA	1.0655e-05
aggregated_scATAC_peak_2927	chr1	128532427	128533079	upstream	11293	1	ENSMUSG00000100078	Gm6170	processed_pseudogene	4.37501e-06
aggregated_scATAC_peak_2928	chr1	128533324	128533566	upstream	11985	1	ENSMUSG00000100078	Gm6170	processed_pseudogene	9.74585e-05
aggregated_scATAC_peak_2936	chr1	128639642	128640387	upstream	47721	1	ENSMUSG00000045382	Cxcr4	protein_coding	1.09751e-06
aggregated_scATAC_peak_2964	chr1	130524459	130525193	NA	NA	0,1	NA	NA	NA	1.4293e-05
aggregated_scATAC_peak_2982	chr1	130936360	130936798	PeakInsideFeature	3536	0	ENSMUSG00000016524	Il19	protein_coding	2.24148e-06
aggregated_scATAC_peak_3085	chr1	132304589	132305098	PeakInsideFeature	6218	1	ENSMUSG00000042115	Klhdc8a	protein_coding	1.8842e-07
aggregated_scATAC_peak_3171	chr1	133236738	133237456	downstream	32711	1	ENSMUSG00000101693	Gm19461	antisense_RNA	7.07562e-05
aggregated_scATAC_peak_3195	chr1	133408790	133409653	PeakInsideFeature	15155	1	ENSMUSG00000070643	Sox13	protein_coding	6.82646e-07
aggregated_scATAC_peak_3254	chr1	133965309	133965593	PeakInsideFeature	3289	1	ENSMUSG00000100987	Gm1627	lincRNA	5.80674e-06
aggregated_scATAC_peak_3279	chr1	134195289	134196299	PeakInsideFeature	2346	1	ENSMUSG00000042451	Mybph	protein_coding	5.07103e-05
aggregated_scATAC_peak_3387	chr1	135523988	135524870	PeakInsideFeature	909	0	ENSMUSG00000104524	Gm37333	TEC	8.37182e-06
aggregated_scATAC_peak_3388	chr1	135531134	135531532	upstream	5995	1	ENSMUSG00000104524	Gm37333	TEC	5.2505e-06
aggregated_scATAC_peak_3401	chr1	135595847	135596381	PeakInsideFeature	11181	1	ENSMUSG00000009418	Nav1	protein_coding	6.38914e-08
aggregated_scATAC_peak_3425	chr1	135740809	135741702	PeakInsideFeature	21195	1	ENSMUSG00000026421	Csrp1	protein_coding	7.1819e-07
aggregated_scATAC_peak_3459	chr1	135967105	135967309	PeakInsideFeature	39135	1	ENSMUSG00000051985	Igfn1	protein_coding	2.39894e-05
aggregated_scATAC_peak_3480	chr1	136189376	136189589	PeakInsideFeature	23346	1	ENSMUSG00000087230	Mroh3	protein_coding	5.67183e-05
aggregated_scATAC_peak_3619	chr1	150043172	150043507	upstream	19084	1	ENSMUSG00000099701	Gm19136	processed_pseudogene	1.62445e-05
aggregated_scATAC_peak_3712	chr1	152687146	152687979	overlapStart	61	0	ENSMUSG00000086145	Gm15479	sense_intronic	2.99697e-05
aggregated_scATAC_peak_3737	chr1	153021098	153021497	NA	NA	0,1	NA	NA	NA	1.43997e-05
aggregated_scATAC_peak_3954	chr1	156781931	156782434	upstream	11330	1	ENSMUSG00000046057	Gm15428	processed_pseudogene	3.48793e-05
aggregated_scATAC_peak_4019	chr1	159517601	159518115	upstream	5911	1	ENSMUSG00000015829	Tnr	protein_coding	3.928e-05
aggregated_scATAC_peak_4103	chr1	162243199	162243962	downstream	20212	1	ENSMUSG00000065516	Mir214	miRNA	1.14429e-08
aggregated_scATAC_peak_4140	chr1	163853038	163853578	NA	NA	0,1	NA	NA	NA	1.023e-05
aggregated_scATAC_peak_4141	chr1	163874183	163874761	NA	NA	0,1	NA	NA	NA	6.39534e-06
aggregated_scATAC_peak_4173	chr1	165046543	165047129	downstream	22491	1	ENSMUSG00000080561	Gm26042	miRNA	4.26238e-06
aggregated_scATAC_peak_4207	chr1	165701285	165702037	downstream	6896	1	ENSMUSG00000105249	Gm44458	miRNA	2.51765e-05
aggregated_scATAC_peak_4231	chr1	166089690	166090189	upstream	2475	0	ENSMUSG00000102484	Gm37923	lincRNA	1.6373e-05
aggregated_scATAC_peak_4325	chr1	168234372	168234682	NA	NA	0,1	NA	NA	NA	4.76617e-05
aggregated_scATAC_peak_4352	chr1	169238575	169238986	NA	NA	0,1	NA	NA	NA	2.20861e-05
aggregated_scATAC_peak_4368	chr1	169916546	169917010	upstream	11870	1	ENSMUSG00000070532	Ccdc190	protein_coding	7.93234e-05
aggregated_scATAC_peak_4402	chr1	170499901	170500174	NA	NA	0,1	NA	NA	NA	1.66314e-07
aggregated_scATAC_peak_4593	chr1	175028284	175029192	NA	NA	0,1	NA	NA	NA	2.20252e-05
aggregated_scATAC_peak_4611	chr1	176137630	176138118	upstream	41327	1	ENSMUSG00000103277	Gm37916	TEC	1.94598e-05
aggregated_scATAC_peak_4668	chr1	178661089	178661984	downstream	24631	1	ENSMUSG00000064967	Gm24405	snRNA	5.45288e-09
aggregated_scATAC_peak_4673	chr1	178798186	178798818	downstream	42694	1	ENSMUSG00000102922	Gm34176	processed_pseudogene	2.86461e-05
aggregated_scATAC_peak_4690	chr1	179197844	179198119	NA	NA	0,1	NA	NA	NA	3.74853e-06
aggregated_scATAC_peak_4830	chr1	181261906	181262414	upstream	19840	1	ENSMUSG00000081214	Rpl35a-ps2	processed_pseudogene	6.13983e-08
aggregated_scATAC_peak_4930	chr1	182699876	182700255	downstream	12336	1	ENSMUSG00000102688	Gm37218	lincRNA	2.42787e-05
aggregated_scATAC_peak_4951	chr1	183113393	183114019	downstream	39100	1	ENSMUSG00000094807	Gm24975	miRNA	1.45023e-05
aggregated_scATAC_peak_4999	chr1	184672270	184673065	upstream	22366	1	ENSMUSG00000103314	Gm38358	processed_pseudogene	5.8079e-05
aggregated_scATAC_peak_5002	chr1	184688071	184689211	upstream	6393	1	ENSMUSG00000103314	Gm38358	processed_pseudogene	9.97294e-07
aggregated_scATAC_peak_5016	chr1	184781745	184782058	downstream	29411	1	ENSMUSG00000026621	2001-03-01	protein_coding	3.61778e-08
aggregated_scATAC_peak_5017	chr1	184782144	184782993	downstream	28745	1	ENSMUSG00000026621	2001-03-01	protein_coding	1.16101e-08
aggregated_scATAC_peak_5071	chr1	185727765	185728087	upstream	16877	1	ENSMUSG00000103799	Gm38093	lincRNA	9.30814e-07
aggregated_scATAC_peak_5072	chr1	185731020	185731576	upstream	13505	1	ENSMUSG00000103799	Gm38093	lincRNA	8.53729e-10
aggregated_scATAC_peak_5075	chr1	185817853	185818363	NA	NA	0,1	NA	NA	NA	1.94693e-07
aggregated_scATAC_peak_5078	chr1	185836618	185837198	downstream	41977	1	ENSMUSG00000102546	Gm9722	processed_pseudogene	2.839e-07
aggregated_scATAC_peak_5089	chr1	186376950	186377566	downstream	29943	1	ENSMUSG00000102217	Gm37491	TEC	2.02016e-06
aggregated_scATAC_peak_5145	chr1	188080396	188080893	NA	NA	0,1	NA	NA	NA	6.8521e-06
aggregated_scATAC_peak_5152	chr1	188385724	188386192	NA	NA	0,1	NA	NA	NA	1.30458e-07
aggregated_scATAC_peak_5160	chr1	188893346	188893831	NA	NA	0,1	NA	NA	NA	4.28215e-07
aggregated_scATAC_peak_5177	chr1	189204436	189204636	downstream	6477	1	ENSMUSG00000103669	2900042K21Rik	sense_overlapping	5.67183e-05
aggregated_scATAC_peak_5181	chr1	189351841	189352265	downstream	8622	1	ENSMUSG00000104507	A430027H14Rik	antisense_RNA	7.88587e-05
aggregated_scATAC_peak_5329	chr1	191461596	191462602	PeakInsideFeature	2949	0	ENSMUSG00000103114	Gm32200	lincRNA	5.98387e-05
aggregated_scATAC_peak_5403	chr1	192834561	192835679	overlapStart	94	0	ENSMUSG00000047384	A730013G03Rik	TEC	2.3885e-08
aggregated_scATAC_peak_5406	chr1	192861598	192862017	upstream	6052	1	ENSMUSG00000016262	Sertad4	protein_coding	2.85829e-05
aggregated_scATAC_peak_5432	chr1	193407527	193408141	upstream	37536	1	ENSMUSG00000016179	Camk1g	protein_coding	1.57558e-06
aggregated_scATAC_peak_5434	chr1	193419136	193419482	upstream	49011	1	ENSMUSG00000016179	Camk1g	protein_coding	4.7497e-05
aggregated_scATAC_peak_5447	chr1	193550121	193551292	upstream	40532	1	ENSMUSG00000097850	4631405K08Rik	lincRNA	1.37251e-05
aggregated_scATAC_peak_42370	chr2	4282759	4283153	downstream	18211	1	ENSMUSG00000087355	Gm13187	processed_transcript	1.79121e-05
aggregated_scATAC_peak_42396	chr2	4541859	4543316	downstream	44699	1	ENSMUSG00000086018	Gm13179	antisense_RNA	2.52367e-05
aggregated_scATAC_peak_42582	chr2	11425502	11426194	downstream	5624	1	ENSMUSG00000082314	Gm13296	processed_pseudogene	1.96552e-05
aggregated_scATAC_peak_42603	chr2	12011309	12011887	NA	NA	0,1	NA	NA	NA	9.00222e-05
aggregated_scATAC_peak_42604	chr2	12060202	12060729	downstream	23526	1	ENSMUSG00000080801	Gm13310	processed_pseudogene	4.35736e-06
aggregated_scATAC_peak_42605	chr2	12189114	12189351	NA	NA	0,1	NA	NA	NA	3.29157e-05
aggregated_scATAC_peak_42657	chr2	14496284	14496519	upstream	16189	1	ENSMUSG00000084901	Gm13266	processed_transcript	6.47208e-05
aggregated_scATAC_peak_42658	chr2	14502100	14503002	upstream	10040	1	ENSMUSG00000084901	Gm13266	processed_transcript	2.80953e-06
aggregated_scATAC_peak_42681	chr2	16792944	16793144	NA	NA	0,1	NA	NA	NA	3.3661e-05
aggregated_scATAC_peak_42802	chr2	20284436	20285254	downstream	4326	1	ENSMUSG00000065253	Gm23970	snRNA	3.3111e-05
aggregated_scATAC_peak_42803	chr2	20291081	20291984	downstream	11013	1	ENSMUSG00000065253	Gm23970	snRNA	2.78886e-05
aggregated_scATAC_peak_43013	chr2	26052636	26053004	upstream	6190	1	ENSMUSG00000087515	Gm13554	antisense_RNA	4.55975e-07
aggregated_scATAC_peak_43037	chr2	26314299	26314507	upstream	1112	0	ENSMUSG00000026930	Gpsm1	protein_coding	1.91046e-05
aggregated_scATAC_peak_43093	chr2	26974127	26974491	PeakInsideFeature	893	0	ENSMUSG00000014852	Adamts13	protein_coding	7.09024e-05
aggregated_scATAC_peak_43118	chr2	27183737	27184124	upstream	5452	1	ENSMUSG00000091192	Sardhos	antisense_RNA	5.37386e-05
aggregated_scATAC_peak_43176	chr2	27750970	27751528	NA	NA	0,1	NA	NA	NA	8.69835e-07
aggregated_scATAC_peak_43186	chr2	27812898	27813744	NA	NA	0,1	NA	NA	NA	2.41463e-08
aggregated_scATAC_peak_43188	chr2	27847039	27847423	upstream	39194	1	ENSMUSG00000026837	Col5a1	protein_coding	1.17227e-05
aggregated_scATAC_peak_43352	chr2	29689598	29690031	downstream	48851	1	ENSMUSG00000048316	Gm9823	pseudogene	5.64138e-06
aggregated_scATAC_peak_43443	chr2	30652491	30653077	PeakInsideFeature	23129	1	ENSMUSG00000086405	9330198N18Rik	lincRNA	2.52598e-05
aggregated_scATAC_peak_43477	chr2	30830438	30830770	upstream	271	0	ENSMUSG00000039483	Asb6	protein_coding	3.36664e-05
aggregated_scATAC_peak_43481	chr2	30846402	30847138	PeakInsideFeature	11798	1	ENSMUSG00000039476	Prrx2	protein_coding	7.35573e-05
aggregated_scATAC_peak_43490	chr2	30918052	30919231	downstream	5715	1	ENSMUSG00000084143	Gm13400	processed_pseudogene	4.37361e-05
aggregated_scATAC_peak_43539	chr2	31339786	31340377	PeakInsideFeature	25667	1	ENSMUSG00000055632	Hmcn2	protein_coding	2.95307e-11
aggregated_scATAC_peak_43819	chr2	33700495	33701331	downstream	17986	1	ENSMUSG00000085463	9430024E24Rik	lincRNA	6.6388e-07
aggregated_scATAC_peak_43821	chr2	33708107	33708520	downstream	10585	1	ENSMUSG00000085463	9430024E24Rik	lincRNA	1.98265e-07
aggregated_scATAC_peak_43871	chr2	34591452	34592196	downstream	26825	1	ENSMUSG00000081992	Gm13408	processed_pseudogene	1.15862e-08
aggregated_scATAC_peak_43918	chr2	35273635	35273893	upstream	6626	1	ENSMUSG00000106961	Gm43128	TEC	9.6258e-05
aggregated_scATAC_peak_44026	chr2	37781452	37782332	PeakInsideFeature	5643	1	ENSMUSG00000035403	Crb2	protein_coding	2.58216e-08
aggregated_scATAC_peak_44090	chr2	38771484	38771696	upstream	6146	1	ENSMUSG00000082508	Rpl15-ps4	processed_pseudogene	7.0356e-05
aggregated_scATAC_peak_44118	chr2	40465950	40466229	NA	NA	0,1	NA	NA	NA	4.43678e-05
aggregated_scATAC_peak_44264	chr2	50833896	50835010	NA	NA	0,1	NA	NA	NA	6.31981e-08
aggregated_scATAC_peak_44293	chr2	51649940	51650406	downstream	22662	1	ENSMUSG00000056115	Tas2r134	protein_coding	3.00119e-06
aggregated_scATAC_peak_44301	chr2	51864949	51865660	downstream	6314	1	ENSMUSG00000087701	Gm13493	processed_pseudogene	2.69997e-07
aggregated_scATAC_peak_44454	chr2	59622416	59623026	PeakInsideFeature	10679	1	ENSMUSG00000035168	Tanc1	protein_coding	1.4708e-08
aggregated_scATAC_peak_44470	chr2	59828724	59829509	NA	NA	0,1	NA	NA	NA	1.50093e-05
aggregated_scATAC_peak_44538	chr2	61193685	61193907	upstream	30996	1	ENSMUSG00000083197	Gm13581	processed_pseudogene	1.24372e-05
aggregated_scATAC_peak_44539	chr2	61193990	61194478	upstream	30558	1	ENSMUSG00000083197	Gm13581	processed_pseudogene	5.22637e-05
aggregated_scATAC_peak_44573	chr2	63272670	63273033	NA	NA	0,1	NA	NA	NA	1.26871e-06
aggregated_scATAC_peak_44574	chr2	63273673	63274272	NA	NA	0,1	NA	NA	NA	4.60125e-05
aggregated_scATAC_peak_44579	chr2	63702270	63703038	NA	NA	0,1	NA	NA	NA	2.6419e-06
aggregated_scATAC_peak_44683	chr2	69053402	69053651	downstream	35430	1	ENSMUSG00000102662	Gm38377	TEC	1.60398e-05
aggregated_scATAC_peak_44966	chr2	74380928	74381291	NA	NA	0,1	NA	NA	NA	4.68592e-07
aggregated_scATAC_peak_44967	chr2	74408813	74409617	NA	NA	0,1	NA	NA	NA	1.64101e-06
aggregated_scATAC_peak_45005	chr2	74760099	74760488	PeakInsideFeature	2602	0	ENSMUSG00000075277	Haglr	lincRNA	8.83353e-05
aggregated_scATAC_peak_45013	chr2	74930088	74931061	downstream	4940	1	ENSMUSG00000084574	n-R5s198	rRNA	3.70981e-07
aggregated_scATAC_peak_45017	chr2	75010665	75011025	NA	NA	0,1	NA	NA	NA	5.37145e-05
aggregated_scATAC_peak_45021	chr2	75027024	75027577	NA	NA	0,1	NA	NA	NA	1.14559e-07
aggregated_scATAC_peak_45022	chr2	75027727	75027927	NA	NA	0,1	NA	NA	NA	2.09204e-05
aggregated_scATAC_peak_45026	chr2	75064831	75065090	NA	NA	0,1	NA	NA	NA	4.54886e-06
aggregated_scATAC_peak_45034	chr2	75147548	75147755	PeakInsideFeature	8797	1	ENSMUSG00000100303	2600014E21Rik	lincRNA	3.05055e-05
aggregated_scATAC_peak_45044	chr2	75356640	75357087	upstream	8159	1	ENSMUSG00000102473	Gm37243	TEC	3.17592e-06
aggregated_scATAC_peak_45045	chr2	75412399	75412716	upstream	23499	1	ENSMUSG00000087504	Gm13658	lincRNA	4.54811e-05
aggregated_scATAC_peak_45142	chr2	76982451	76982767	overlapStart	62	0	ENSMUSG00000051747	Ttn	protein_coding	7.58968e-05
aggregated_scATAC_peak_45332	chr2	85160627	85161106	overlapStart	88	0	ENSMUSG00000085135	Gm13713	antisense_RNA	2.34803e-05
aggregated_scATAC_peak_45335	chr2	85172153	85172806	PeakInsideFeature	11702	1	ENSMUSG00000085135	Gm13713	antisense_RNA	9.955e-05
aggregated_scATAC_peak_45337	chr2	85224319	85225041	upstream	8995	1	ENSMUSG00000085025	Gm13715	lincRNA	2.5352e-07
aggregated_scATAC_peak_45403	chr2	91377561	91377801	downstream	29455	1	ENSMUSG00000080507	Gm22071	miRNA	5.01805e-05
aggregated_scATAC_peak_45551	chr2	93310003	93310537	PeakInsideFeature	24235	1	ENSMUSG00000027217	Tspan18	protein_coding	1.05318e-06
aggregated_scATAC_peak_45581	chr2	93488775	93489405	upstream	25950	1	ENSMUSG00000027215	Cd82	protein_coding	5.66526e-05
aggregated_scATAC_peak_45585	chr2	93538045	93538663	upstream	22214	1	ENSMUSG00000075024	Gm10803	protein_coding	1.3842e-05
aggregated_scATAC_peak_45600	chr2	93738653	93739575	NA	NA	0,1	NA	NA	NA	3.25531e-05
aggregated_scATAC_peak_45618	chr2	93885977	93886378	upstream	17021	1	ENSMUSG00000075023	Accsl	protein_coding	5.33346e-06
aggregated_scATAC_peak_45664	chr2	98709825	98710563	upstream	42893	1	ENSMUSG00000075014	Gm10800	protein_coding	6.01069e-08
aggregated_scATAC_peak_45697	chr2	102005534	102006455	upstream	33635	1	ENSMUSG00000085417	Gm13919	antisense_RNA	3.14876e-06
aggregated_scATAC_peak_45819	chr2	104080253	104080465	PeakInsideFeature	10510	1	ENSMUSG00000068686	Cd59b	protein_coding	9.83799e-05
aggregated_scATAC_peak_45856	chr2	105048035	105048553	upstream	16007	1	ENSMUSG00000083487	Gm13888	processed_pseudogene	2.92261e-06
aggregated_scATAC_peak_45863	chr2	105141863	105142102	PeakInsideFeature	15453	1	ENSMUSG00000016458	Wt1	protein_coding	5.44741e-05
aggregated_scATAC_peak_45867	chr2	105199731	105200580	upstream	24164	1	ENSMUSG00000055312	Them7	protein_coding	2.46683e-05
aggregated_scATAC_peak_45868	chr2	105206684	105207484	upstream	17236	1	ENSMUSG00000055312	Them7	protein_coding	8.44978e-08
aggregated_scATAC_peak_45905	chr2	105987264	105987523	upstream	5363	1	ENSMUSG00000093363	Gm22002	miRNA	3.83544e-06
aggregated_scATAC_peak_45914	chr2	106457944	106458479	NA	NA	0,1	NA	NA	NA	8.07302e-08
aggregated_scATAC_peak_46031	chr2	113701471	113701921	PeakInsideFeature	6854	1	ENSMUSG00000084798	4930533B01Rik	antisense_RNA	8.99548e-06
aggregated_scATAC_peak_46061	chr2	115391395	115392366	downstream	47495	1	ENSMUSG00000086197	Gm13976	lincRNA	5.09873e-05
aggregated_scATAC_peak_46440	chr2	124460903	124461254	NA	NA	0,1	NA	NA	NA	5.07735e-06
aggregated_scATAC_peak_46447	chr2	124919782	124920570	NA	NA	0,1	NA	NA	NA	1.02636e-10
aggregated_scATAC_peak_46576	chr2	128143938	128144305	PeakInsideFeature	18084	1	ENSMUSG00000027381	Bcl2l11	protein_coding	4.6641e-05
aggregated_scATAC_peak_46615	chr2	128549565	128549876	downstream	8514	1	ENSMUSG00000082671	Gm14006	processed_pseudogene	5.57677e-05
aggregated_scATAC_peak_46680	chr2	129908719	129909531	upstream	39443	1	ENSMUSG00000100255	Gm28196	lincRNA	2.26237e-06
aggregated_scATAC_peak_46683	chr2	129954594	129955759	downstream	6608	1	ENSMUSG00000100255	Gm28196	lincRNA	4.80384e-08
aggregated_scATAC_peak_46805	chr2	132197977	132198600	downstream	49519	1	ENSMUSG00000027341	Tmem230	protein_coding	5.21799e-06
aggregated_scATAC_peak_46834	chr2	132880779	132881707	overlapStart	352	0	ENSMUSG00000043110	Lrrn4	protein_coding	1.38126e-07
aggregated_scATAC_peak_46846	chr2	133136467	133137089	NA	NA	0,1	NA	NA	NA	1.09351e-05
aggregated_scATAC_peak_46848	chr2	133203938	133204835	downstream	4775	1	ENSMUSG00000083689	Gm14094	processed_pseudogene	4.50018e-05
aggregated_scATAC_peak_46849	chr2	133208364	133208809	downstream	8975	1	ENSMUSG00000083689	Gm14094	processed_pseudogene	9.26126e-05
aggregated_scATAC_peak_46895	chr2	135123943	135124283	NA	NA	0,1	NA	NA	NA	1.66132e-05
aggregated_scATAC_peak_46938	chr2	136947963	136948395	NA	NA	0,1	NA	NA	NA	3.18345e-07
aggregated_scATAC_peak_46955	chr2	137307737	137308420	PeakInsideFeature	19575	1	ENSMUSG00000085504	Gm14055	lincRNA	9.88306e-06
aggregated_scATAC_peak_47015	chr2	141013929	141014275	NA	NA	0,1	NA	NA	NA	3.34385e-05
aggregated_scATAC_peak_47019	chr2	141231013	141231307	PeakInsideFeature	4266	0	ENSMUSG00000074763	Macrod2os2	antisense_RNA	2.52377e-05
aggregated_scATAC_peak_47081	chr2	144191126	144191346	PeakInsideFeature	16754	1	ENSMUSG00000074758	Gm5535	lincRNA	3.09003e-06
aggregated_scATAC_peak_47129	chr2	145620674	145621526	NA	NA	0,1	NA	NA	NA	5.19987e-07
aggregated_scATAC_peak_47274	chr2	148373590	148374081	upstream	21508	1	ENSMUSG00000037014	Sstr4	protein_coding	2.24606e-05
aggregated_scATAC_peak_47305	chr2	149755013	149755315	downstream	11989	1	ENSMUSG00000081494	Gm14130	processed_pseudogene	4.89023e-06
aggregated_scATAC_peak_47362	chr2	151921597	151921989	PeakInsideFeature	10583	1	ENSMUSG00000027460	Angpt4	protein_coding	1.11294e-05
aggregated_scATAC_peak_47556	chr2	154459862	154460317	PeakInsideFeature	23609	1	ENSMUSG00000038533	Cbfa2t2	protein_coding	9.34884e-06
aggregated_scATAC_peak_47634	chr2	155759089	155759518	downstream	8187	1	ENSMUSG00000027611	Procr	protein_coding	2.62801e-06
aggregated_scATAC_peak_47648	chr2	155949370	155949609	upstream	4123	0	ENSMUSG00000038259	Gdf5	protein_coding	2.09684e-05
aggregated_scATAC_peak_47794	chr2	157887197	157887633	upstream	14121	1	ENSMUSG00000062846	Gm14176	processed_pseudogene	1.73886e-07
aggregated_scATAC_peak_47795	chr2	157887782	157887999	upstream	13646	1	ENSMUSG00000062846	Gm14176	processed_pseudogene	2.80686e-05
aggregated_scATAC_peak_47889	chr2	158856181	158856566	NA	NA	0,1	NA	NA	NA	5.83604e-07
aggregated_scATAC_peak_47901	chr2	159040101	159040415	upstream	29605	1	ENSMUSG00000104628	Gm44319	miRNA	6.34084e-07
aggregated_scATAC_peak_47923	chr2	160062080	160062349	downstream	45561	1	ENSMUSG00000086653	9130015L21Rik	lincRNA	1.82903e-05
aggregated_scATAC_peak_48082	chr2	163716847	163717183	upstream	24736	1	ENSMUSG00000087129	Gm16316	antisense_RNA	4.72876e-05
aggregated_scATAC_peak_48098	chr2	163912088	163912565	PeakInsideFeature	6357	1	ENSMUSG00000035226	Rims4	protein_coding	2.51773e-06
aggregated_scATAC_peak_48184	chr2	164970645	164971216	PeakInsideFeature	10128	1	ENSMUSG00000017740	Slc12a5	protein_coding	1.84983e-05
aggregated_scATAC_peak_48192	chr2	165100748	165101221	upstream	10234	1	ENSMUSG00000078935	1700025C18Rik	protein_coding	7.37595e-05
aggregated_scATAC_peak_48201	chr2	165195457	165196249	downstream	36441	1	ENSMUSG00000086630	Gm14397	antisense_RNA	3.53269e-05
aggregated_scATAC_peak_48346	chr2	166412309	166412780	upstream	14357	1	ENSMUSG00000087617	Gm14268	lincRNA	6.93229e-06
aggregated_scATAC_peak_48348	chr2	166426910	166427448	upstream	20272	1	ENSMUSG00000085129	5031425F14Rik	lincRNA	4.77308e-05
aggregated_scATAC_peak_48349	chr2	166433528	166433891	upstream	13741	1	ENSMUSG00000085129	5031425F14Rik	lincRNA	7.15186e-05
aggregated_scATAC_peak_48351	chr2	166459967	166460429	downstream	12747	1	ENSMUSG00000085129	5031425F14Rik	lincRNA	5.04839e-07
aggregated_scATAC_peak_48457	chr2	167562291	167562699	PeakInsideFeature	9181	1	ENSMUSG00000085596	Gm11476	processed_transcript	9.00679e-06
aggregated_scATAC_peak_48465	chr2	167595789	167596225	downstream	4612	1	ENSMUSG00000081511	Gm11475	processed_pseudogene	5.77152e-05
aggregated_scATAC_peak_48467	chr2	167596981	167597971	downstream	6081	1	ENSMUSG00000081511	Gm11475	processed_pseudogene	8.6238e-05
aggregated_scATAC_peak_48531	chr2	168055876	168056836	downstream	8541	1	ENSMUSG00000092849	Gm24327	miRNA	8.03503e-07
aggregated_scATAC_peak_48536	chr2	168091569	168091915	PeakInsideFeature	10738	1	ENSMUSG00000044641	Pard6b	protein_coding	6.52446e-06
aggregated_scATAC_peak_48626	chr2	168871999	168872925	downstream	9706	1	ENSMUSG00000077761	Gm25214	snoRNA	4.82574e-05
aggregated_scATAC_peak_48665	chr2	169699738	169700470	NA	NA	0,1	NA	NA	NA	1.75943e-09
aggregated_scATAC_peak_48666	chr2	169702645	169703124	NA	NA	0,1	NA	NA	NA	8.62184e-07
aggregated_scATAC_peak_48672	chr2	169750566	169751511	NA	NA	0,1	NA	NA	NA	3.45055e-06
aggregated_scATAC_peak_48847	chr2	172675037	172675607	NA	NA	0,1	NA	NA	NA	1.78177e-05
aggregated_scATAC_peak_48870	chr2	172924924	172925435	PeakInsideFeature	15141	1	ENSMUSG00000008999	Bmp7	protein_coding	3.04634e-07
aggregated_scATAC_peak_48947	chr2	173850770	173851452	upstream	3441	0	ENSMUSG00000085938	Gm14371	unprocessed_pseudogene	1.83e-05
aggregated_scATAC_peak_48957	chr2	174049444	174051301	upstream	3099	0	ENSMUSG00000082519	Vamp7-ps	processed_pseudogene	2.21017e-08
aggregated_scATAC_peak_49004	chr2	174858452	174859891	PeakInsideFeature	2883	1	ENSMUSG00000086177	Gm14616	lincRNA	7.30251e-07
aggregated_scATAC_peak_49007	chr2	174878689	174879360	downstream	22735	1	ENSMUSG00000086177	Gm14616	lincRNA	2.7097e-05
aggregated_scATAC_peak_49009	chr2	174897469	174897995	downstream	41443	1	ENSMUSG00000086177	Gm14616	lincRNA	1.72711e-08
aggregated_scATAC_peak_49039	chr2	178256995	178257704	NA	NA	0,1	NA	NA	NA	5.08148e-05
aggregated_scATAC_peak_49040	chr2	178258129	178258728	NA	NA	0,1	NA	NA	NA	3.53269e-05
aggregated_scATAC_peak_49070	chr2	178728479	178729037	NA	NA	0,1	NA	NA	NA	7.28805e-05
aggregated_scATAC_peak_49152	chr2	180354523	180355428	upstream	20277	1	ENSMUSG00000015627	Gata5	protein_coding	6.69716e-10
aggregated_scATAC_peak_49155	chr2	180385266	180386635	overlapStart	65	0	ENSMUSG00000084843	B230312C02Rik	lincRNA	1.61893e-06
aggregated_scATAC_peak_49323	chr3	8717228	8718061	downstream	18716	1	ENSMUSG00000103346	C230057A21Rik	lincRNA	1.26695e-05
aggregated_scATAC_peak_49326	chr3	8736183	8736813	overlapStart	138	0	ENSMUSG00000103346	C230057A21Rik	lincRNA	1.90036e-06
aggregated_scATAC_peak_49401	chr3	10260922	10261160	downstream	19229	1	ENSMUSG00000102834	1700029B24Rik	TEC	7.63206e-06
aggregated_scATAC_peak_49417	chr3	11328528	11329005	NA	NA	0,1	NA	NA	NA	2.82761e-07
aggregated_scATAC_peak_49488	chr3	19644093	19644558	overlapStart	148	0	ENSMUSG00000060913	Trim55	protein_coding	2.31047e-05
aggregated_scATAC_peak_49530	chr3	24048213	24048597	NA	NA	0,1	NA	NA	NA	2.88512e-05
aggregated_scATAC_peak_49566	chr3	27572345	27572929	downstream	12358	1	ENSMUSG00000092695	Mir3092	miRNA	2.32409e-07
aggregated_scATAC_peak_49599	chr3	28013995	28014386	NA	NA	0,1	NA	NA	NA	1.58008e-05
aggregated_scATAC_peak_49665	chr3	30258418	30258837	downstream	11319	1	ENSMUSG00000069074	Gm10258	TEC	4.23414e-05
aggregated_scATAC_peak_49677	chr3	30470438	30471085	upstream	17664	1	ENSMUSG00000104079	Gm37024	TEC	1.15054e-05
aggregated_scATAC_peak_49731	chr3	32185939	32186145	NA	NA	0,1	NA	NA	NA	3.7466e-05
aggregated_scATAC_peak_49755	chr3	32822500	32823245	PeakInsideFeature	5326	1	ENSMUSG00000056900	Usp13	protein_coding	9.2751e-06
aggregated_scATAC_peak_49851	chr3	35702275	35702759	upstream	32856	1	ENSMUSG00000064834	Gm25696	snRNA	3.19336e-05
aggregated_scATAC_peak_49976	chr3	39390489	39390774	upstream	31729	1	ENSMUSG00000050533	Gm9845	processed_pseudogene	5.23409e-07
aggregated_scATAC_peak_49978	chr3	39888437	39888637	NA	NA	0,1	NA	NA	NA	9.1386e-05
aggregated_scATAC_peak_50005	chr3	41195377	41195654	upstream	22853	1	ENSMUSG00000105258	Gm40038	lincRNA	8.60124e-06
aggregated_scATAC_peak_50049	chr3	49642362	49642622	upstream	1215	0	ENSMUSG00000103568	Gm29741	processed_pseudogene	3.49396e-07
aggregated_scATAC_peak_50064	chr3	51031766	51032128	downstream	42909	1	ENSMUSG00000102067	Gm29230	lincRNA	2.67222e-05
aggregated_scATAC_peak_50131	chr3	51778294	51779518	upstream	16818	1	ENSMUSG00000102732	Gm37342	TEC	9.77698e-05
aggregated_scATAC_peak_50297	chr3	55242333	55243265	overlapStart	435	0	ENSMUSG00000027797	Dclk1	protein_coding	6.37062e-05
aggregated_scATAC_peak_50476	chr3	65360157	65360449	upstream	10874	1	ENSMUSG00000090120	A730090N16Rik	antisense_RNA	2.78886e-05
aggregated_scATAC_peak_50477	chr3	65360523	65360740	upstream	11203	1	ENSMUSG00000090120	A730090N16Rik	antisense_RNA	3.85074e-05
aggregated_scATAC_peak_50503	chr3	65858762	65859446	downstream	5725	1	ENSMUSG00000103440	Gm37131	TEC	1.40969e-05
aggregated_scATAC_peak_50569	chr3	68467675	68468712	NA	NA	0,1	NA	NA	NA	2.00291e-06
aggregated_scATAC_peak_50582	chr3	68590459	68590872	upstream	42958	1	ENSMUSG00000084617	Gm22073	snRNA	3.70981e-07
aggregated_scATAC_peak_50614	chr3	69511466	69512649	NA	NA	0,1	NA	NA	NA	8.26676e-08
aggregated_scATAC_peak_50674	chr3	79343042	79343311	PeakInsideFeature	6515	1	ENSMUSG00000091685	Gm17359	protein_coding	9.78584e-05
aggregated_scATAC_peak_50687	chr3	79783689	79784651	upstream	46290	1	ENSMUSG00000034009	Rxfp1	protein_coding	4.24414e-06
aggregated_scATAC_peak_50719	chr3	81221672	81221899	NA	NA	0,1	NA	NA	NA	2.90568e-06
aggregated_scATAC_peak_50727	chr3	81938994	81939305	PeakInsideFeature	6549	1	ENSMUSG00000028015	Ctso	protein_coding	9.55454e-05
aggregated_scATAC_peak_50728	chr3	81975092	81975465	PeakInsideFeature	924	0	ENSMUSG00000028011	Tdo2	protein_coding	9.77707e-07
aggregated_scATAC_peak_50729	chr3	81975588	81975974	PeakInsideFeature	421	0	ENSMUSG00000028011	Tdo2	protein_coding	5.67977e-09
aggregated_scATAC_peak_50730	chr3	81989696	81990204	PeakInsideFeature	7660	1	ENSMUSG00000028008	Asic5	protein_coding	1.4998e-05
aggregated_scATAC_peak_50732	chr3	82054448	82055146	PeakInsideFeature	19892	1	ENSMUSG00000028005	Gucy1b3	protein_coding	7.19327e-08
aggregated_scATAC_peak_50735	chr3	82112535	82112746	upstream	6331	1	ENSMUSG00000098712	Mir7010	miRNA	1.41228e-05
aggregated_scATAC_peak_50763	chr3	83204942	83205704	NA	NA	0,1	NA	NA	NA	1.28735e-05
aggregated_scATAC_peak_50916	chr3	86556779	86557266	upstream	8393	1	ENSMUSG00000057777	Mab21l2	protein_coding	8.39817e-06
aggregated_scATAC_peak_50921	chr3	86723493	86724183	NA	NA	0,1	NA	NA	NA	3.1788e-09
aggregated_scATAC_peak_50922	chr3	86724972	86725495	NA	NA	0,1	NA	NA	NA	3.82089e-05
aggregated_scATAC_peak_51195	chr3	89565473	89565756	PeakInsideFeature	45450	1	ENSMUSG00000000794	Kcnn3	protein_coding	4.6641e-05
aggregated_scATAC_peak_51257	chr3	90404738	90405074	upstream	14968	1	ENSMUSG00000027932	Slc27a3	protein_coding	2.8904e-05
aggregated_scATAC_peak_51329	chr3	94476355	94476571	upstream	1832	0	ENSMUSG00000028137	Celf3	protein_coding	4.07856e-07
aggregated_scATAC_peak_51347	chr3	94699831	94700087	PeakInsideFeature	6403	1	ENSMUSG00000068877	Selenbp2	protein_coding	5.58e-05
aggregated_scATAC_peak_51641	chr3	97981445	97982052	upstream	31779	1	ENSMUSG00000027878	Notch2	protein_coding	5.4016e-06
aggregated_scATAC_peak_51759	chr3	101161582	101162184	downstream	45516	1	ENSMUSG00000082415	Gm12486	processed_pseudogene	1.71369e-05
aggregated_scATAC_peak_51760	chr3	101163586	101164290	downstream	43461	1	ENSMUSG00000082415	Gm12486	processed_pseudogene	1.13015e-07
aggregated_scATAC_peak_51776	chr3	101381664	101381991	PeakInsideFeature	4745	1	ENSMUSG00000042035	Igsf3	protein_coding	9.48928e-08
aggregated_scATAC_peak_51869	chr3	102586052	102586611	upstream	13041	1	ENSMUSG00000104619	Gm42678	lincRNA	1.85785e-06
aggregated_scATAC_peak_51870	chr3	102670662	102671287	downstream	15743	1	ENSMUSG00000104685	Gm19202	processed_pseudogene	9.24388e-06
aggregated_scATAC_peak_51942	chr3	104313331	104314201	NA	NA	0,1	NA	NA	NA	9.69388e-07
aggregated_scATAC_peak_51953	chr3	104376361	104377163	upstream	10149	1	ENSMUSG00000022187	Gm5546	lincRNA	1.08199e-05
aggregated_scATAC_peak_51996	chr3	104940690	104941117	downstream	17469	1	ENSMUSG00000105925	Gm43846	sense_intronic	9.03226e-07
aggregated_scATAC_peak_52007	chr3	105040046	105040418	PeakInsideFeature	12914	1	ENSMUSG00000062127	Cttnbp2nl	protein_coding	1.64018e-05
aggregated_scATAC_peak_52023	chr3	105423256	105423964	upstream	28720	1	ENSMUSG00000040896	Kcnd3	protein_coding	1.12803e-08
aggregated_scATAC_peak_52060	chr3	106937888	106938244	NA	NA	0,1	NA	NA	NA	9.24388e-06
aggregated_scATAC_peak_52131	chr3	107850349	107851189	upstream	17230	1	ENSMUSG00000106426	Gm36211	lincRNA	7.26337e-05
aggregated_scATAC_peak_52288	chr3	116536332	116537142	downstream	4588	1	ENSMUSG00000105992	Gm43651	TEC	4.94903e-06
aggregated_scATAC_peak_52404	chr3	121941002	121941274	upstream	11403	1	ENSMUSG00000039831	Arhgap29	protein_coding	1.04349e-05
aggregated_scATAC_peak_52425	chr3	122133095	122133608	downstream	19267	1	ENSMUSG00000105351	Gm43157	processed_pseudogene	1.14705e-06
aggregated_scATAC_peak_52465	chr3	122518270	122518740	downstream	23176	1	ENSMUSG00000104773	Mir7657	miRNA	5.06721e-05
aggregated_scATAC_peak_52619	chr3	128239879	128240625	upstream	8646	1	ENSMUSG00000105816	D030025E07Rik	processed_transcript	6.47761e-05
aggregated_scATAC_peak_52620	chr3	128306174	128306642	upstream	25317	1	ENSMUSG00000106119	Gm43656	processed_pseudogene	1.41078e-05
aggregated_scATAC_peak_52680	chr3	129981870	129982596	upstream	12027	1	ENSMUSG00000027994	Mcub	protein_coding	4.27088e-09
aggregated_scATAC_peak_52699	chr3	130866985	130867369	overlapStart	102	0	ENSMUSG00000104557	Gm36520	lincRNA	6.92941e-05
aggregated_scATAC_peak_52701	chr3	130883922	130884534	upstream	623	0	ENSMUSG00000105628	Gm43350	TEC	1.00678e-06
aggregated_scATAC_peak_52716	chr3	131089662	131090084	upstream	20598	1	ENSMUSG00000027985	Lef1	protein_coding	2.19237e-07
aggregated_scATAC_peak_52765	chr3	132343695	132343895	NA	NA	0,1	NA	NA	NA	1.60132e-05
aggregated_scATAC_peak_52766	chr3	132349760	132350318	NA	NA	0,1	NA	NA	NA	2.05815e-06
aggregated_scATAC_peak_52842	chr3	135636458	135636909	downstream	17882	1	ENSMUSG00000106149	Gm43430	TEC	2.49692e-05
aggregated_scATAC_peak_52895	chr3	137827499	137828338	upstream	24449	1	ENSMUSG00000105427	Gm31678	lincRNA	2.27905e-06
aggregated_scATAC_peak_52969	chr3	141549442	141550166	NA	NA	0,1	NA	NA	NA	6.45734e-05
aggregated_scATAC_peak_52994	chr3	142430172	142430372	upstream	34576	1	ENSMUSG00000028273	Pdlim5	protein_coding	1.60398e-05
aggregated_scATAC_peak_53022	chr3	143574303	143574767	upstream	2079	0	ENSMUSG00000104939	Gm33651	lincRNA	3.48992e-06
aggregated_scATAC_peak_53034	chr3	144011485	144012510	NA	NA	0,1	NA	NA	NA	1.94044e-06
aggregated_scATAC_peak_53152	chr3	146278536	146278800	upstream	45752	1	ENSMUSG00000105209	Gm43334	TEC	2.39894e-05
aggregated_scATAC_peak_53183	chr3	147278696	147279006	NA	NA	0,1	NA	NA	NA	6.59047e-05
aggregated_scATAC_peak_53188	chr3	147707435	147707818	NA	NA	0,1	NA	NA	NA	4.8668e-05
aggregated_scATAC_peak_53191	chr3	148342892	148344134	downstream	10705	1	ENSMUSG00000077441	Gm23131	snoRNA	4.91148e-05
aggregated_scATAC_peak_53194	chr3	148409375	148409931	upstream	45288	1	ENSMUSG00000105718	Gm43576	TEC	3.35393e-06
aggregated_scATAC_peak_53234	chr3	149305033	149305345	PeakInsideFeature	360	0	ENSMUSG00000105797	Gm5149	lincRNA	2.56868e-05
aggregated_scATAC_peak_53243	chr3	149532700	149532967	NA	NA	0,1	NA	NA	NA	1.83924e-06
aggregated_scATAC_peak_53257	chr3	152029478	152029893	downstream	41232	1	ENSMUSG00000104659	Gm43619	lincRNA	4.54586e-07
aggregated_scATAC_peak_53283	chr3	152304213	152304809	PeakInsideFeature	35896	1	ENSMUSG00000054942	Miga1	protein_coding	2.52973e-05
aggregated_scATAC_peak_53328	chr3	153396798	153397001	NA	NA	0,1	NA	NA	NA	5.67183e-05
aggregated_scATAC_peak_53330	chr3	153511038	153511768	upstream	33193	1	ENSMUSG00000104908	1700015C17Rik	sense_intronic	3.2373e-05
aggregated_scATAC_peak_53379	chr3	154540500	154540958	NA	NA	0,1	NA	NA	NA	1.17256e-06
aggregated_scATAC_peak_53393	chr3	154880506	154880990	upstream	40548	1	ENSMUSG00000102238	Gm37890	TEC	1.51802e-06
aggregated_scATAC_peak_53400	chr3	156373205	156373487	NA	NA	0,1	NA	NA	NA	1.0655e-05
aggregated_scATAC_peak_53407	chr3	156947403	156947805	upstream	26824	1	ENSMUSG00000086708	Gm15577	antisense_RNA	7.33051e-05
aggregated_scATAC_peak_53439	chr3	159781949	159782903	NA	NA	0,1	NA	NA	NA	3.40977e-06
aggregated_scATAC_peak_53473	chr4	5327226	5327654	NA	NA	0,1	NA	NA	NA	2.97394e-05
aggregated_scATAC_peak_53549	chr4	8990307	8990546	downstream	49167	1	ENSMUSG00000083786	Rps18-ps2	processed_pseudogene	5.48115e-05
aggregated_scATAC_peak_53660	chr4	11954852	11955297	downstream	6187	1	ENSMUSG00000080663	Gm25002	miRNA	1.78461e-06
aggregated_scATAC_peak_53674	chr4	12278534	12278799	PeakInsideFeature	7267	1	ENSMUSG00000085909	Gm11846	lincRNA	1.78177e-05
aggregated_scATAC_peak_53679	chr4	12782060	12782265	upstream	30544	1	ENSMUSG00000065823	n-R5s182	rRNA	6.19325e-05
aggregated_scATAC_peak_53682	chr4	13093553	13093900	PeakInsideFeature	17586	1	ENSMUSG00000086227	Gm11820	lincRNA	2.90633e-08
aggregated_scATAC_peak_53689	chr4	13264753	13266098	downstream	1624	0	ENSMUSG00000080359	Gm26250	miRNA	1.26696e-07
aggregated_scATAC_peak_53690	chr4	13267949	13268247	upstream	1048	0	ENSMUSG00000080359	Gm26250	miRNA	1.25457e-05
aggregated_scATAC_peak_53691	chr4	13364737	13365176	NA	NA	0,1	NA	NA	NA	3.44629e-07
aggregated_scATAC_peak_53692	chr4	13479951	13480309	downstream	3062	1	ENSMUSG00000083328	Gm11826	processed_pseudogene	7.4559e-05
aggregated_scATAC_peak_53703	chr4	13832975	13833203	NA	NA	0,1	NA	NA	NA	8.49885e-07
aggregated_scATAC_peak_53754	chr4	20627533	20627765	NA	NA	0,1	NA	NA	NA	1.82903e-05
aggregated_scATAC_peak_53811	chr4	24996096	24996353	upstream	28775	1	ENSMUSG00000046219	C230012O17Rik	processed_transcript	2.04109e-06
aggregated_scATAC_peak_53822	chr4	28783937	28784471	upstream	28927	1	ENSMUSG00000028289	Epha7	protein_coding	4.30791e-06
aggregated_scATAC_peak_53825	chr4	28814886	28815741	overlapStart	238	0	ENSMUSG00000086774	Gm11915	antisense_RNA	8.85241e-06
aggregated_scATAC_peak_53836	chr4	31404990	31405679	downstream	24862	1	ENSMUSG00000082254	Gm11922	processed_pseudogene	9.31669e-06
aggregated_scATAC_peak_53871	chr4	32279850	32280219	downstream	28273	1	ENSMUSG00000087049	Bach2it1	sense_intronic	7.17867e-06
aggregated_scATAC_peak_54201	chr4	43837499	43837797	PeakInsideFeature	2553	0	ENSMUSG00000111611	Olfr157	protein_coding	9.55531e-05
aggregated_scATAC_peak_54275	chr4	44940302	44940781	upstream	3211	0	ENSMUSG00000084854	Gm12678	lincRNA	2.43244e-06
aggregated_scATAC_peak_54330	chr4	45540651	45540925	upstream	7955	1	ENSMUSG00000065322	Gm22055	snRNA	7.68058e-06
aggregated_scATAC_peak_54357	chr4	45824093	45824604	PeakInsideFeature	2575	0	ENSMUSG00000035551	Igfbpl1	protein_coding	2.02455e-05
aggregated_scATAC_peak_54505	chr4	47644985	47645497	downstream	41352	1	ENSMUSG00000098518	Gm27668	misc_RNA	5.66865e-09
aggregated_scATAC_peak_54579	chr4	53111865	53112269	PeakInsideFeature	47828	1	ENSMUSG00000015243	Abca1	protein_coding	9.6258e-05
aggregated_scATAC_peak_54624	chr4	54373482	54374886	NA	NA	0,1	NA	NA	NA	2.33799e-06
aggregated_scATAC_peak_54626	chr4	54391564	54391816	NA	NA	0,1	NA	NA	NA	2.69245e-05
aggregated_scATAC_peak_54630	chr4	54469984	54470570	downstream	1925	0	ENSMUSG00000093183	Gm25687	misc_RNA	1.25698e-08
aggregated_scATAC_peak_54635	chr4	54601628	54602170	downstream	37276	1	ENSMUSG00000081428	Tpt1-ps2	processed_pseudogene	4.62128e-05
aggregated_scATAC_peak_54638	chr4	54814067	54814299	upstream	38945	1	ENSMUSG00000082111	Gm12479	processed_pseudogene	2.32893e-05
aggregated_scATAC_peak_54688	chr4	55843723	55844344	NA	NA	0,1	NA	NA	NA	8.97472e-08
aggregated_scATAC_peak_54801	chr4	58205694	58207195	overlapStart	415	0	ENSMUSG00000028369	Svep1	protein_coding	3.34431e-08
aggregated_scATAC_peak_54956	chr4	62755568	62755894	upstream	28194	1	ENSMUSG00000086139	Gm11211	lincRNA	7.11925e-05
aggregated_scATAC_peak_55016	chr4	63752662	63753338	upstream	7887	1	ENSMUSG00000050395	Tnfsf15	protein_coding	4.52232e-05
aggregated_scATAC_peak_55037	chr4	65235189	65235422	NA	NA	0,1	NA	NA	NA	8.45883e-06
aggregated_scATAC_peak_55053	chr4	65896454	65896698	NA	NA	0,1	NA	NA	NA	1.09256e-05
aggregated_scATAC_peak_55058	chr4	66175870	66176211	NA	NA	0,1	NA	NA	NA	2.7714e-06
aggregated_scATAC_peak_55059	chr4	66365171	66365858	downstream	11665	1	ENSMUSG00000083080	Gm11484	processed_pseudogene	1.77809e-07
aggregated_scATAC_peak_55067	chr4	66894642	66895047	NA	NA	0,1	NA	NA	NA	3.29705e-06
aggregated_scATAC_peak_55105	chr4	74613102	74613418	upstream	21954	1	ENSMUSG00000099334	Gm26379	snoRNA	6.41348e-05
aggregated_scATAC_peak_55239	chr4	83635684	83635995	downstream	38537	1	ENSMUSG00000098217	Gm27046	processed_pseudogene	6.44159e-05
aggregated_scATAC_peak_55240	chr4	83656487	83657166	upstream	44258	1	ENSMUSG00000080793	Cbx3-ps3	processed_pseudogene	1.48725e-05
aggregated_scATAC_peak_55241	chr4	83751526	83751826	downstream	7999	1	ENSMUSG00000097942	Gm26968	sense_intronic	4.87436e-05
aggregated_scATAC_peak_55246	chr4	83976050	83976513	NA	NA	0,1	NA	NA	NA	4.03321e-06
aggregated_scATAC_peak_55248	chr4	84004195	84004611	downstream	40476	1	ENSMUSG00000085217	6030471H07Rik	lincRNA	2.77937e-05
aggregated_scATAC_peak_55262	chr4	84349398	84350049	NA	NA	0,1	NA	NA	NA	4.50643e-05
aggregated_scATAC_peak_55272	chr4	84637270	84638285	PeakInsideFeature	37497	1	ENSMUSG00000028487	Bnc2	protein_coding	1.98836e-07
aggregated_scATAC_peak_55273	chr4	84674385	84676089	overlapStart	38	0	ENSMUSG00000028487	Bnc2	protein_coding	9.42354e-08
aggregated_scATAC_peak_55293	chr4	86335990	86336412	NA	NA	0,1	NA	NA	NA	8.37007e-05
aggregated_scATAC_peak_55326	chr4	86955168	86955870	NA	NA	0,1	NA	NA	NA	6.20829e-08
aggregated_scATAC_peak_55341	chr4	87708868	87709710	NA	NA	0,1	NA	NA	NA	8.38348e-07
aggregated_scATAC_peak_55344	chr4	87767991	87768581	NA	NA	0,1	NA	NA	NA	8.37581e-05
aggregated_scATAC_peak_55363	chr4	88209428	88209792	NA	NA	0,1	NA	NA	NA	6.93229e-06
aggregated_scATAC_peak_55416	chr4	91081877	91082153	downstream	44115	1	ENSMUSG00000079962	Gm12643	processed_pseudogene	4.85044e-05
aggregated_scATAC_peak_55417	chr4	91082284	91082833	downstream	44658	1	ENSMUSG00000079962	Gm12643	processed_pseudogene	4.74594e-05
aggregated_scATAC_peak_55438	chr4	94747657	94747950	PeakInsideFeature	8515	1	ENSMUSG00000006386	Tek	protein_coding	2.74428e-06
aggregated_scATAC_peak_55461	chr4	95317610	95318396	NA	NA	0,1	NA	NA	NA	4.59257e-08
aggregated_scATAC_peak_55478	chr4	95794578	95795112	NA	NA	0,1	NA	NA	NA	1.44234e-05
aggregated_scATAC_peak_55579	chr4	99983440	99984360	NA	NA	0,1	NA	NA	NA	3.68464e-05
aggregated_scATAC_peak_55581	chr4	100009332	100009722	upstream	42993	1	ENSMUSG00000085142	Gm12702	lincRNA	3.52957e-07
aggregated_scATAC_peak_55589	chr4	100171104	100171998	NA	NA	0,1	NA	NA	NA	3.24391e-05
aggregated_scATAC_peak_55634	chr4	100961455	100961919	NA	NA	0,1	NA	NA	NA	3.02892e-05
aggregated_scATAC_peak_55795	chr4	105469423	105469942	upstream	41550	1	ENSMUSG00000083128	Gm12723	processed_pseudogene	9.60367e-05
aggregated_scATAC_peak_55796	chr4	105470156	105470543	upstream	40882	1	ENSMUSG00000083128	Gm12723	processed_pseudogene	6.35177e-06
aggregated_scATAC_peak_55805	chr4	105760096	105760928	upstream	29357	1	ENSMUSG00000083780	Gm12728	protein_coding	3.25531e-05
aggregated_scATAC_peak_55815	chr4	106019283	106019881	upstream	43697	1	ENSMUSG00000089065	Gm24363	misc_RNA	6.13035e-06
aggregated_scATAC_peak_55831	chr4	106279367	106279613	upstream	11779	1	ENSMUSG00000087051	Gm12730	lincRNA	3.29993e-06
aggregated_scATAC_peak_55945	chr4	107480393	107480923	PeakInsideFeature	46067	1	ENSMUSG00000034762	Glis1	protein_coding	1.65192e-05
aggregated_scATAC_peak_56020	chr4	108349869	108350421	downstream	22005	1	ENSMUSG00000048351	Coa7	protein_coding	6.67096e-06
aggregated_scATAC_peak_56103	chr4	110351195	110352223	overlapStart	200	0	ENSMUSG00000028546	Elavl4	protein_coding	2.50047e-06
aggregated_scATAC_peak_56109	chr4	111357246	111357453	upstream	36745	1	ENSMUSG00000083904	Gm12805	processed_pseudogene	5.01805e-05
aggregated_scATAC_peak_56144	chr4	114477113	114477785	NA	NA	0,1	NA	NA	NA	3.46726e-05
aggregated_scATAC_peak_56149	chr4	114496891	114497118	NA	NA	0,1	NA	NA	NA	8.72478e-06
aggregated_scATAC_peak_56150	chr4	114501119	114501399	NA	NA	0,1	NA	NA	NA	6.07717e-06
aggregated_scATAC_peak_56375	chr4	117651850	117652375	downstream	30161	1	ENSMUSG00000009640	Dmap1	protein_coding	4.89208e-06
aggregated_scATAC_peak_56470	chr4	119008512	119009384	upstream	8463	1	ENSMUSG00000087464	Gm12862	lincRNA	2.13548e-09
aggregated_scATAC_peak_56695	chr4	123385451	123385781	upstream	42364	1	ENSMUSG00000032726	Bmp8a	protein_coding	1.82593e-05
aggregated_scATAC_peak_57024	chr4	128641779	128642731	downstream	4784	1	ENSMUSG00000084891	Gm12958	lincRNA	8.41979e-06
aggregated_scATAC_peak_57305	chr4	131918642	131919168	PeakInsideFeature	1124	0	ENSMUSG00000085667	Gm12992	processed_transcript	2.31181e-05
aggregated_scATAC_peak_57382	chr4	132955376	132955616	upstream	18599	1	ENSMUSG00000028874	Fgr	protein_coding	4.51922e-05
aggregated_scATAC_peak_57383	chr4	132955697	132956420	upstream	18037	1	ENSMUSG00000028874	Fgr	protein_coding	2.04245e-09
aggregated_scATAC_peak_57433	chr4	133281939	133282401	upstream	858	0	ENSMUSG00000083241	Gm13259	processed_pseudogene	3.79033e-06
aggregated_scATAC_peak_57452	chr4	133432500	133433202	upstream	47281	1	ENSMUSG00000046694	Fam46b	protein_coding	8.6238e-05
aggregated_scATAC_peak_57509	chr4	133941249	133942127	downstream	26962	1	ENSMUSG00000003038	Hmgn2	protein_coding	2.31991e-06
aggregated_scATAC_peak_57570	chr4	134430419	134430772	downstream	19575	1	ENSMUSG00000087343	1700021N21Rik	antisense_RNA	6.67573e-05
aggregated_scATAC_peak_57659	chr4	135232457	135232852	PeakInsideFeature	40160	1	ENSMUSG00000037242	Clic4	protein_coding	1.17702e-06
aggregated_scATAC_peak_57689	chr4	135553159	135553538	PeakInsideFeature	20282	1	ENSMUSG00000037188	Grhl3	protein_coding	6.4411e-05
aggregated_scATAC_peak_57690	chr4	135559860	135560219	PeakInsideFeature	13590	1	ENSMUSG00000037188	Grhl3	protein_coding	8.65133e-05
aggregated_scATAC_peak_57878	chr4	137135896	137136115	upstream	17863	1	ENSMUSG00000087417	Gm13001	lincRNA	1.58058e-05
aggregated_scATAC_peak_57879	chr4	137139155	137139631	upstream	21250	1	ENSMUSG00000087417	Gm13001	lincRNA	1.43066e-06
aggregated_scATAC_peak_57961	chr4	137869622	137870041	PeakInsideFeature	7595	1	ENSMUSG00000057530	Ece1	protein_coding	1.17563e-05
aggregated_scATAC_peak_57962	chr4	137877247	137878110	downstream	6259	1	ENSMUSG00000085823	Gm13012	antisense_RNA	1.00791e-05
aggregated_scATAC_peak_57964	chr4	137892156	137893176	upstream	8729	1	ENSMUSG00000085823	Gm13012	antisense_RNA	9.8405e-05
aggregated_scATAC_peak_58018	chr4	138523740	138524229	NA	NA	0,1	NA	NA	NA	6.19232e-05
aggregated_scATAC_peak_58378	chr4	141879906	141880410	downstream	4451	1	ENSMUSG00000100396	Gm29367	lincRNA	5.62967e-05
aggregated_scATAC_peak_58379	chr4	141885234	141885529	upstream	272	0	ENSMUSG00000085922	Fhad1os2	antisense_RNA	6.22913e-05
aggregated_scATAC_peak_58381	chr4	141922004	141922255	downstream	36476	1	ENSMUSG00000085922	Fhad1os2	antisense_RNA	6.19325e-05
aggregated_scATAC_peak_58382	chr4	141925764	141926406	downstream	40431	1	ENSMUSG00000085922	Fhad1os2	antisense_RNA	2.16783e-06
aggregated_scATAC_peak_58397	chr4	142037938	142038206	downstream	10506	1	ENSMUSG00000085574	Gm13053	sense_intronic	5.69882e-06
aggregated_scATAC_peak_58460	chr4	143330498	143330974	upstream	9663	1	ENSMUSG00000088395	Gm26313	misc_RNA	2.82021e-05
aggregated_scATAC_peak_58467	chr4	143472625	143472887	upstream	7982	1	ENSMUSG00000084059	Gm13046	unprocessed_pseudogene	7.27717e-05
aggregated_scATAC_peak_58485	chr4	145005160	145005426	upstream	46445	1	ENSMUSG00000103911	Gm38074	TEC	1.06769e-05
aggregated_scATAC_peak_58742	chr4	149903013	149903482	upstream	758	0	ENSMUSG00000086767	Gm13070	antisense_RNA	3.49335e-05
aggregated_scATAC_peak_58887	chr4	151120814	151121156	downstream	31415	1	ENSMUSG00000078491	Gm13090	protein_coding	5.75962e-07
aggregated_scATAC_peak_59026	chr4	152816181	152816849	NA	NA	0,1	NA	NA	NA	1.52452e-05
aggregated_scATAC_peak_59048	chr4	153318787	153319679	NA	NA	0,1	NA	NA	NA	2.41449e-06
aggregated_scATAC_peak_59060	chr4	153593275	153593539	NA	NA	0,1	NA	NA	NA	2.61391e-05
aggregated_scATAC_peak_59093	chr4	154224248	154225064	downstream	4115	1	ENSMUSG00000081276	Gm13132	processed_pseudogene	8.14673e-06
aggregated_scATAC_peak_59462	chr5	15521032	15521287	PeakInsideFeature	4671	1	ENSMUSG00000094230	Gm21847	antisense_RNA	7.68803e-05
aggregated_scATAC_peak_59464	chr5	15934101	15935395	overlapStart	57	0	ENSMUSG00000040118	Cacna2d1	protein_coding	1.7559e-05
aggregated_scATAC_peak_59468	chr5	16095444	16095855	upstream	11479	1	ENSMUSG00000105526	Gm43490	TEC	1.27894e-07
aggregated_scATAC_peak_59469	chr5	16182839	16183201	NA	NA	0,1	NA	NA	NA	8.65133e-05
aggregated_scATAC_peak_59554	chr5	21543358	21543765	overlapStart	3	0	ENSMUSG00000039883	Lrrc17	protein_coding	8.946e-07
aggregated_scATAC_peak_59573	chr5	22160912	22161395	NA	NA	0,1	NA	NA	NA	1.49977e-05
aggregated_scATAC_peak_59637	chr5	24334792	24335080	PeakInsideFeature	1013	0	ENSMUSG00000086729	Gm15589	antisense_RNA	6.60166e-05
aggregated_scATAC_peak_59643	chr5	24352511	24352925	upstream	1114	0	ENSMUSG00000038319	Kcnh2	protein_coding	5.98579e-05
aggregated_scATAC_peak_60064	chr5	33244502	33244767	upstream	10684	1	ENSMUSG00000107161	Gm43850	processed_pseudogene	1.85785e-06
aggregated_scATAC_peak_60099	chr5	33714409	33714788	upstream	7076	1	ENSMUSG00000054252	Fgfr3	protein_coding	5.76883e-07
aggregated_scATAC_peak_60365	chr5	37198279	37198519	upstream	43541	1	ENSMUSG00000029121	Crmp1	protein_coding	3.31235e-05
aggregated_scATAC_peak_60397	chr5	37962315	37963078	upstream	20997	1	ENSMUSG00000107126	Gm40289	lincRNA	3.65327e-08
aggregated_scATAC_peak_60398	chr5	37963772	37964061	upstream	19777	1	ENSMUSG00000107126	Gm40289	lincRNA	2.15551e-06
aggregated_scATAC_peak_60399	chr5	37967416	37968383	upstream	15793	1	ENSMUSG00000107126	Gm40289	lincRNA	3.2869e-07
aggregated_scATAC_peak_60444	chr5	38798995	38799195	NA	NA	0,1	NA	NA	NA	5.3667e-05
aggregated_scATAC_peak_60489	chr5	43456000	43456404	upstream	14490	1	ENSMUSG00000104691	Gm43021	lincRNA	9.07033e-08
aggregated_scATAC_peak_60537	chr5	44922241	44923188	upstream	43486	1	ENSMUSG00000062496	4930431F12Rik	lincRNA	2.09845e-05
aggregated_scATAC_peak_60563	chr5	46794443	46794692	overlapStart	112	0	ENSMUSG00000107113	Gm43092	TEC	6.60449e-05
aggregated_scATAC_peak_60565	chr5	46992316	46993142	NA	NA	0,1	NA	NA	NA	5.1098e-07
aggregated_scATAC_peak_60614	chr5	52254633	52255212	downstream	15586	1	ENSMUSG00000105328	Gm43180	TEC	2.68913e-06
aggregated_scATAC_peak_60615	chr5	52279591	52279819	downstream	40369	1	ENSMUSG00000105328	Gm43180	TEC	5.86747e-05
aggregated_scATAC_peak_60628	chr5	52539542	52540146	overlapEnd	1013	0	ENSMUSG00000104829	Gm43685	antisense_RNA	6.67357e-08
aggregated_scATAC_peak_60636	chr5	52643892	52644635	upstream	25252	1	ENSMUSG00000052295	8030423F21Rik	lincRNA	9.77103e-05
aggregated_scATAC_peak_60654	chr5	53041981	53042681	PeakInsideFeature	4250	1	ENSMUSG00000029188	Slc34a2	protein_coding	9.09199e-05
aggregated_scATAC_peak_60718	chr5	57759945	57760657	upstream	18572	1	ENSMUSG00000104821	Gm42481	TEC	1.13483e-05
aggregated_scATAC_peak_60789	chr5	64447907	64448138	PeakInsideFeature	14067	1	ENSMUSG00000105105	Gm31363	lincRNA	3.10619e-05
aggregated_scATAC_peak_60975	chr5	67572805	67573005	downstream	34921	1	ENSMUSG00000106947	1700025A08Rik	TEC	5.30492e-05
aggregated_scATAC_peak_61083	chr5	73690186	73690573	downstream	39001	1	ENSMUSG00000029155	Spata18	protein_coding	7.96512e-05
aggregated_scATAC_peak_61087	chr5	73782575	73783257	NA	NA	0,1	NA	NA	NA	1.01291e-06
aggregated_scATAC_peak_61091	chr5	73888270	73888773	upstream	24374	1	ENSMUSG00000107027	1700019F05Rik	lincRNA	3.62524e-05
aggregated_scATAC_peak_61124	chr5	74361572	74361941	upstream	3337	0	ENSMUSG00000084132	Gm15982	transcribed_unprocessed_pseudogene	1.68777e-06
aggregated_scATAC_peak_61134	chr5	74647346	74648083	NA	NA	0,1	NA	NA	NA	2.17547e-05
aggregated_scATAC_peak_61143	chr5	74811131	74811359	NA	NA	0,1	NA	NA	NA	2.09416e-05
aggregated_scATAC_peak_61146	chr5	74847935	74848223	upstream	35256	1	ENSMUSG00000106806	Gm17906	processed_pseudogene	2.43927e-05
aggregated_scATAC_peak_61149	chr5	74874301	74875285	upstream	8542	1	ENSMUSG00000106806	Gm17906	processed_pseudogene	2.91528e-05
aggregated_scATAC_peak_61150	chr5	74877613	74877985	upstream	5536	1	ENSMUSG00000106806	Gm17906	processed_pseudogene	1.0725e-06
aggregated_scATAC_peak_61157	chr5	74941247	74942000	upstream	7566	1	ENSMUSG00000072874	Gm6116	lincRNA	4.29253e-06
aggregated_scATAC_peak_61202	chr5	75554657	75554922	downstream	6360	1	ENSMUSG00000089078	Gm24502	snRNA	1.42115e-06
aggregated_scATAC_peak_61207	chr5	75734574	75734961	upstream	3114	0	ENSMUSG00000107251	Gm43102	TEC	1.91008e-06
aggregated_scATAC_peak_61227	chr5	76065776	76066260	upstream	5255	1	ENSMUSG00000107020	Gm6051	processed_pseudogene	8.94813e-05
aggregated_scATAC_peak_61327	chr5	87113381	87113925	downstream	956	0	ENSMUSG00000106502	Gm42795	processed_pseudogene	1.26719e-05
aggregated_scATAC_peak_61472	chr5	92627956	92628410	downstream	25142	1	ENSMUSG00000047963	Stbd1	protein_coding	3.66954e-06
aggregated_scATAC_peak_61487	chr5	92784143	92784905	downstream	4038	1	ENSMUSG00000089268	Mir1961	miRNA	6.22913e-05
aggregated_scATAC_peak_61500	chr5	92886123	92886465	NA	NA	0,1	NA	NA	NA	5.35934e-07
aggregated_scATAC_peak_61502	chr5	92890597	92891216	NA	NA	0,1	NA	NA	NA	4.63127e-06
aggregated_scATAC_peak_61538	chr5	95940203	95941310	upstream	16195	1	ENSMUSG00000023078	Cxcl13	protein_coding	1.24136e-07
aggregated_scATAC_peak_61579	chr5	97348673	97349142	downstream	23004	1	ENSMUSG00000104717	Gm33969	lincRNA	3.53479e-07
aggregated_scATAC_peak_61605	chr5	98827299	98827710	upstream	26911	1	ENSMUSG00000029335	Bmp3	protein_coding	7.30244e-07
aggregated_scATAC_peak_61626	chr5	99522646	99523132	upstream	12207	1	ENSMUSG00000090006	Gm16227	sense_intronic	6.54726e-07
aggregated_scATAC_peak_61693	chr5	100837969	100838266	downstream	6837	1	ENSMUSG00000077354	Gm26286	snoRNA	6.98986e-05
aggregated_scATAC_peak_61709	chr5	101323283	101323651	downstream	17889	1	ENSMUSG00000105965	Cycs-ps2	processed_pseudogene	6.41463e-05
aggregated_scATAC_peak_61788	chr5	103381032	103381434	upstream	24535	1	ENSMUSG00000104684	5430427N15Rik	lincRNA	2.3801e-06
aggregated_scATAC_peak_61804	chr5	103629546	103629820	upstream	280	0	ENSMUSG00000029321	Slc10a6	protein_coding	3.97584e-05
aggregated_scATAC_peak_61903	chr5	106119459	106120016	downstream	24647	1	ENSMUSG00000106483	Gm32736	lincRNA	5.11563e-05
aggregated_scATAC_peak_61970	chr5	107195693	107196667	upstream	35609	1	ENSMUSG00000105033	Gm43423	TEC	2.87922e-05
aggregated_scATAC_peak_62054	chr5	109666350	109667239	downstream	24247	1	ENSMUSG00000072763	5430403G16Rik	protein_coding	2.12013e-05
aggregated_scATAC_peak_62254	chr5	112364171	112364842	upstream	2706	0	ENSMUSG00000105368	Gm43759	TEC	7.34762e-05
aggregated_scATAC_peak_62304	chr5	112966462	112966894	PeakInsideFeature	49113	1	ENSMUSG00000042249	Grk3	protein_coding	9.75695e-05
aggregated_scATAC_peak_62358	chr5	113420595	113420954	NA	NA	0,1	NA	NA	NA	3.40016e-05
aggregated_scATAC_peak_62387	chr5	113648789	113648989	PeakInsideFeature	1537	0	ENSMUSG00000042190	Cmklr1	protein_coding	5.86747e-05
aggregated_scATAC_peak_62390	chr5	113689258	113689524	downstream	35381	1	ENSMUSG00000042184	1700069L16Rik	protein_coding	2.90568e-06
aggregated_scATAC_peak_62401	chr5	113800244	113800788	overlapStart	0	0	ENSMUSG00000054675	Tmem119	protein_coding	2.93563e-05
aggregated_scATAC_peak_62403	chr5	113808249	113808478	upstream	7848	1	ENSMUSG00000054675	Tmem119	protein_coding	9.71391e-06
aggregated_scATAC_peak_62461	chr5	114467071	114467980	downstream	23257	1	ENSMUSG00000041939	Mvk	protein_coding	3.70026e-08
aggregated_scATAC_peak_62610	chr5	116271226	116271923	downstream	13913	1	ENSMUSG00000086055	Gm13837	antisense_RNA	2.78807e-08
aggregated_scATAC_peak_62611	chr5	116273176	116273465	downstream	15659	1	ENSMUSG00000086055	Gm13837	antisense_RNA	1.37934e-05
aggregated_scATAC_peak_62617	chr5	116396482	116396880	upstream	3881	0	ENSMUSG00000086945	4930562A09Rik	lincRNA	9.89325e-07
aggregated_scATAC_peak_62635	chr5	116569509	116570102	downstream	3689	1	ENSMUSG00000106914	Gm42854	sense_intronic	5.75363e-05
aggregated_scATAC_peak_62636	chr5	116571115	116571782	downstream	2047	1	ENSMUSG00000106914	Gm42854	sense_intronic	1.34631e-05
aggregated_scATAC_peak_62798	chr5	118666950	118667240	upstream	20523	1	ENSMUSG00000107115	Gm43052	TEC	4.44796e-05
aggregated_scATAC_peak_62813	chr5	118829093	118829833	downstream	48002	1	ENSMUSG00000106708	Gm43782	lincRNA	1.83253e-08
aggregated_scATAC_peak_62838	chr5	119188419	119188874	downstream	11372	1	ENSMUSG00000107334	Gm7538	lincRNA	8.73135e-06
aggregated_scATAC_peak_62842	chr5	119249072	119249716	upstream	47851	1	ENSMUSG00000084548	n-R5s175	rRNA	3.79326e-08
aggregated_scATAC_peak_62845	chr5	119291791	119292478	upstream	5111	1	ENSMUSG00000084548	n-R5s175	rRNA	2.50431e-06
aggregated_scATAC_peak_62853	chr5	119380038	119380900	NA	NA	0,1	NA	NA	NA	6.72633e-06
aggregated_scATAC_peak_62872	chr5	119608810	119609406	upstream	10904	1	ENSMUSG00000106991	Gm43399	TEC	1.21509e-05
aggregated_scATAC_peak_62877	chr5	119622059	119622331	upstream	3747	0	ENSMUSG00000085708	Gm16063	lincRNA	5.96171e-06
aggregated_scATAC_peak_62884	chr5	119651106	119652100	PeakInsideFeature	5469	1	ENSMUSG00000085345	Gm16064	lincRNA	4.99472e-09
aggregated_scATAC_peak_62919	chr5	119947693	119948098	upstream	11347	1	ENSMUSG00000107063	Gm38554	lincRNA	9.61736e-05
aggregated_scATAC_peak_62920	chr5	119958866	119959456	overlapStart	82	0	ENSMUSG00000107063	Gm38554	lincRNA	2.2324e-06
aggregated_scATAC_peak_62924	chr5	120015320	120016109	upstream	48621	1	ENSMUSG00000064617	n-R5s176	rRNA	2.64898e-07
aggregated_scATAC_peak_62926	chr5	120054559	120055052	upstream	9529	1	ENSMUSG00000064617	n-R5s176	rRNA	1.92712e-07
aggregated_scATAC_peak_62992	chr5	120516191	120516484	PeakInsideFeature	5170	1	ENSMUSG00000032754	Slc8b1	protein_coding	9.30415e-06
aggregated_scATAC_peak_63050	chr5	121184918	121185828	overlapStart	377	0	ENSMUSG00000106940	Gm42930	TEC	7.08368e-08
aggregated_scATAC_peak_63056	chr5	121292148	121292789	NA	NA	0,1	NA	NA	NA	8.11411e-05
aggregated_scATAC_peak_63101	chr5	121930137	121930717	NA	NA	0,1	NA	NA	NA	4.76247e-06
aggregated_scATAC_peak_63103	chr5	121948341	121949301	NA	NA	0,1	NA	NA	NA	5.28942e-07
aggregated_scATAC_peak_63105	chr5	121972614	121973303	NA	NA	0,1	NA	NA	NA	9.25046e-06
aggregated_scATAC_peak_63308	chr5	124159422	124159870	upstream	35261	1	ENSMUSG00000089842	Pitpnm2os2	antisense_RNA	4.05864e-06
aggregated_scATAC_peak_63309	chr5	124161868	124162234	upstream	32856	1	ENSMUSG00000089842	Pitpnm2os2	antisense_RNA	3.07166e-05
aggregated_scATAC_peak_63466	chr5	127241218	127242632	overlapStart	117	0	ENSMUSG00000034324	Tmem132c	protein_coding	2.36875e-05
aggregated_scATAC_peak_63468	chr5	127306726	127307273	upstream	2017	0	ENSMUSG00000104971	9430087B13Rik	TEC	1.80054e-05
aggregated_scATAC_peak_63469	chr5	127310399	127311149	downstream	1757	0	ENSMUSG00000104971	9430087B13Rik	TEC	3.84146e-07
aggregated_scATAC_peak_63470	chr5	127319041	127319777	downstream	10392	1	ENSMUSG00000104971	9430087B13Rik	TEC	6.3234e-08
aggregated_scATAC_peak_63471	chr5	127323921	127324570	downstream	15229	1	ENSMUSG00000104971	9430087B13Rik	TEC	1.74632e-05
aggregated_scATAC_peak_63518	chr5	128619733	128620301	downstream	19173	1	ENSMUSG00000081683	Fzd10	protein_coding	2.05779e-05
aggregated_scATAC_peak_63536	chr5	128952933	128953730	overlapStart	154	0	ENSMUSG00000029420	Rimbp2	protein_coding	4.62155e-05
aggregated_scATAC_peak_63546	chr5	129103844	129104353	PeakInsideFeature	7348	1	ENSMUSG00000044017	Adgrd1	protein_coding	6.61518e-05
aggregated_scATAC_peak_63550	chr5	129165207	129165534	upstream	36853	1	ENSMUSG00000060419	Rps16-ps2	processed_pseudogene	6.33268e-05
aggregated_scATAC_peak_63622	chr5	130623272	130623526	upstream	4848	0	ENSMUSG00000106849	Gm43418	TEC	2.25062e-07
aggregated_scATAC_peak_63710	chr5	133166926	133167393	NA	NA	0,1	NA	NA	NA	7.04164e-09
aggregated_scATAC_peak_63713	chr5	133385697	133386351	NA	NA	0,1	NA	NA	NA	1.98863e-06
aggregated_scATAC_peak_63788	chr5	134779158	134779614	upstream	32063	1	ENSMUSG00000029675	Eln	protein_coding	4.1306e-06
aggregated_scATAC_peak_63790	chr5	134788159	134788642	upstream	41077	1	ENSMUSG00000029675	Eln	protein_coding	7.62437e-05
aggregated_scATAC_peak_63894	chr5	136038231	136038997	overlapStart	118	0	ENSMUSG00000042985	Upk3b	protein_coding	8.15599e-05
aggregated_scATAC_peak_63918	chr5	136408786	136409009	upstream	33095	1	ENSMUSG00000106479	Mir721	miRNA	5.3667e-05
aggregated_scATAC_peak_63944	chr5	136769483	136769886	NA	NA	0,1	NA	NA	NA	1.46282e-06
aggregated_scATAC_peak_63945	chr5	136771206	136771615	NA	NA	0,1	NA	NA	NA	1.16402e-05
aggregated_scATAC_peak_63955	chr5	136861054	136861726	downstream	8332	1	ENSMUSG00000092402	Gm20485	sense_intronic	2.99682e-05
aggregated_scATAC_peak_64099	chr5	139024810	139025141	upstream	27606	1	ENSMUSG00000025856	Pdgfa	protein_coding	3.70769e-07
aggregated_scATAC_peak_64347	chr5	142540181	142540430	upstream	10230	1	ENSMUSG00000074817	Papolb	protein_coding	4.54586e-07
aggregated_scATAC_peak_64366	chr5	142811115	142811725	PeakInsideFeature	6242	1	ENSMUSG00000039477	Tnrc18	protein_coding	1.02666e-05
aggregated_scATAC_peak_64470	chr5	144370911	144371527	upstream	13107	1	ENSMUSG00000038859	Baiap2l1	protein_coding	7.52725e-05
aggregated_scATAC_peak_64656	chr5	148272078	148272543	NA	NA	0,1	NA	NA	NA	6.57665e-06
aggregated_scATAC_peak_64729	chr5	149320269	149321375	upstream	32954	1	ENSMUSG00000107317	Gm19719	antisense_RNA	4.21989e-11
aggregated_scATAC_peak_64831	chr5	151142694	151143631	NA	NA	0,1	NA	NA	NA	1.44749e-06
aggregated_scATAC_peak_64870	chr6	4489404	4490382	upstream	5695	1	ENSMUSG00000102946	Gm37883	TEC	8.84849e-08
aggregated_scATAC_peak_64876	chr6	4561177	4561877	downstream	10189	1	ENSMUSG00000107828	Gm18289	processed_pseudogene	9.90463e-05
aggregated_scATAC_peak_64879	chr6	4634460	4635164	downstream	24578	1	ENSMUSG00000107932	Gm44432	TEC	5.77035e-05
aggregated_scATAC_peak_64884	chr6	4698305	4698538	PeakInsideFeature	48785	1	ENSMUSG00000004631	Sgce	protein_coding	3.18345e-07
aggregated_scATAC_peak_64899	chr6	4999569	4999918	downstream	40761	1	ENSMUSG00000097396	Gm26556	TEC	2.52425e-06
aggregated_scATAC_peak_64900	chr6	5005458	5006141	downstream	46817	1	ENSMUSG00000097396	Gm26556	TEC	3.83072e-08
aggregated_scATAC_peak_64908	chr6	5137704	5138105	NA	NA	0,1	NA	NA	NA	1.03949e-06
aggregated_scATAC_peak_64935	chr6	5594006	5594330	NA	NA	0,1	NA	NA	NA	2.06879e-05
aggregated_scATAC_peak_64957	chr6	6467565	6467976	upstream	15252	1	ENSMUSG00000093380	Gm20685	lincRNA	4.0879e-05
aggregated_scATAC_peak_65034	chr6	13587825	13588097	PeakInsideFeature	20139	1	ENSMUSG00000029569	Tmem168	protein_coding	7.8083e-06
aggregated_scATAC_peak_65093	chr6	17876758	17877179	upstream	28739	1	ENSMUSG00000098570	Gm27444	misc_RNA	1.04655e-05
aggregated_scATAC_peak_65094	chr6	17888216	17888501	upstream	17349	1	ENSMUSG00000098570	Gm27444	misc_RNA	1.75542e-06
aggregated_scATAC_peak_65095	chr6	17938335	17939363	downstream	23853	1	ENSMUSG00000106858	Gm43844	TEC	8.30426e-11
aggregated_scATAC_peak_65096	chr6	17942062	17942649	downstream	27360	1	ENSMUSG00000106858	Gm43844	TEC	2.56085e-05
aggregated_scATAC_peak_65097	chr6	17952704	17953270	downstream	37991	1	ENSMUSG00000106858	Gm43844	TEC	2.61437e-05
aggregated_scATAC_peak_65098	chr6	18003223	18003500	PeakInsideFeature	27223	1	ENSMUSG00000010797	Wnt2	protein_coding	6.14163e-06
aggregated_scATAC_peak_65107	chr6	18436118	18436993	upstream	5311	1	ENSMUSG00000106944	Gm43843	TEC	9.0606e-06
aggregated_scATAC_peak_65345	chr6	30525994	30526360	upstream	15405	1	ENSMUSG00000071553	Cpa2	protein_coding	9.07157e-07
aggregated_scATAC_peak_65355	chr6	30587312	30587593	upstream	11417	1	ENSMUSG00000086854	Gm13781	antisense_RNA	4.22132e-05
aggregated_scATAC_peak_65356	chr6	30589321	30590196	upstream	13723	1	ENSMUSG00000086854	Gm13781	antisense_RNA	6.9221e-07
aggregated_scATAC_peak_65361	chr6	30622067	30622547	PeakInsideFeature	11297	1	ENSMUSG00000029788	Cpa5	protein_coding	8.4855e-08
aggregated_scATAC_peak_65365	chr6	30665006	30665945	upstream	8468	1	ENSMUSG00000086542	Gm13782	antisense_RNA	3.35821e-06
aggregated_scATAC_peak_65436	chr6	31636746	31637343	downstream	29087	1	ENSMUSG00000084973	Gm13848	lincRNA	6.87271e-05
aggregated_scATAC_peak_65451	chr6	31886775	31887623	NA	NA	0,1	NA	NA	NA	2.67748e-07
aggregated_scATAC_peak_65472	chr6	32530809	32531398	downstream	20031	1	ENSMUSG00000086763	Plxna4os1	antisense_RNA	1.80481e-08
aggregated_scATAC_peak_65589	chr6	36301479	36301903	NA	NA	0,1	NA	NA	NA	4.93679e-05
aggregated_scATAC_peak_65722	chr6	39095044	39095559	PeakInsideFeature	23047	1	ENSMUSG00000038507	Parp12	protein_coding	8.92108e-06
aggregated_scATAC_peak_65748	chr6	39474532	39474760	NA	NA	0,1	NA	NA	NA	2.89665e-05
aggregated_scATAC_peak_65811	chr6	42391634	42392140	upstream	8351	1	ENSMUSG00000046652	Tas2r143	protein_coding	2.02799e-05
aggregated_scATAC_peak_65817	chr6	42899907	42900836	upstream	8506	1	ENSMUSG00000045708	Olfr447	protein_coding	1.0483e-06
aggregated_scATAC_peak_66043	chr6	50984581	50984820	downstream	17432	1	ENSMUSG00000108153	Gm44402	processed_pseudogene	6.92625e-05
aggregated_scATAC_peak_66046	chr6	51065107	51065405	NA	NA	0,1	NA	NA	NA	2.27926e-06
aggregated_scATAC_peak_66351	chr6	55451704	55452631	overlapStart	190	0	ENSMUSG00000029778	Adcyap1r1	protein_coding	6.80173e-06
aggregated_scATAC_peak_66353	chr6	55501047	55501364	upstream	32300	1	ENSMUSG00000104746	Gm44352	miRNA	1.02859e-07
aggregated_scATAC_peak_66441	chr6	63333928	63334158	upstream	5602	1	ENSMUSG00000107525	Gm44071	antisense_RNA	4.63273e-05
aggregated_scATAC_peak_66467	chr6	66200267	66200673	NA	NA	0,1	NA	NA	NA	1.20031e-07
aggregated_scATAC_peak_66471	chr6	66478243	66478885	upstream	12826	1	ENSMUSG00000107479	2610300M13Rik	lincRNA	7.55159e-05
aggregated_scATAC_peak_66568	chr6	71227068	71227969	downstream	27691	1	ENSMUSG00000054422	Fabp1	protein_coding	1.20259e-06
aggregated_scATAC_peak_66594	chr6	71987693	71987950	upstream	24047	1	ENSMUSG00000097133	Gm26628	antisense_RNA	2.82552e-05
aggregated_scATAC_peak_66670	chr6	72711434	72712183	downstream	12594	1	ENSMUSG00000079524	Gm15402	antisense_RNA	3.7096e-06
aggregated_scATAC_peak_66747	chr6	82135935	82136306	NA	NA	0,1	NA	NA	NA	5.4304e-05
aggregated_scATAC_peak_66752	chr6	82455128	82455553	NA	NA	0,1	NA	NA	NA	4.0186e-06
aggregated_scATAC_peak_66848	chr6	83523173	83524045	PeakInsideFeature	12656	1	ENSMUSG00000059430	Actg2	protein_coding	8.21888e-07
aggregated_scATAC_peak_67073	chr6	87160239	87160550	downstream	13615	1	ENSMUSG00000107436	Gm44416	TEC	4.66558e-05
aggregated_scATAC_peak_67392	chr6	92036416	92036712	upstream	20447	1	ENSMUSG00000087317	4930466I24Rik	antisense_RNA	6.57528e-05
aggregated_scATAC_peak_67406	chr6	92414450	92415101	NA	NA	0,1	NA	NA	NA	1.47655e-05
aggregated_scATAC_peak_67438	chr6	92942995	92943925	overlapStart	32	0	ENSMUSG00000030022	Adamts9	protein_coding	1.45954e-06
aggregated_scATAC_peak_67446	chr6	93177350	93177724	upstream	17404	1	ENSMUSG00000108256	Gm43923	TEC	1.01914e-05
aggregated_scATAC_peak_67455	chr6	93391639	93391903	NA	NA	0,1	NA	NA	NA	5.51025e-05
aggregated_scATAC_peak_67579	chr6	97339074	97339864	NA	NA	0,1	NA	NA	NA	7.90958e-06
aggregated_scATAC_peak_67586	chr6	97402857	97403446	upstream	46598	1	ENSMUSG00000108185	Gm19653	processed_pseudogene	2.50038e-07
aggregated_scATAC_peak_67597	chr6	97511864	97512371	downstream	35449	1	ENSMUSG00000064724	Gm25852	snoRNA	9.02673e-06
aggregated_scATAC_peak_67651	chr6	99106998	99107297	upstream	31091	1	ENSMUSG00000105902	AC155839.1	miRNA	4.41375e-05
aggregated_scATAC_peak_67676	chr6	99350248	99350875	downstream	37937	1	ENSMUSG00000093559	Gm20705	sense_intronic	3.92319e-06
aggregated_scATAC_peak_67690	chr6	99535568	99535768	upstream	12947	1	ENSMUSG00000030067	Foxp1	protein_coding	4.38919e-05
aggregated_scATAC_peak_67710	chr6	99927959	99928614	overlapEnd	22645	1	ENSMUSG00000107528	Gm44442	lincRNA	5.05298e-05
aggregated_scATAC_peak_67728	chr6	100092827	100093382	NA	NA	0,1	NA	NA	NA	4.98602e-06
aggregated_scATAC_peak_67746	chr6	100221305	100221581	upstream	25786	1	ENSMUSG00000108269	Gm18422	transcribed_processed_pseudogene	1.44068e-05
aggregated_scATAC_peak_67900	chr6	112302183	112302764	downstream	9243	1	ENSMUSG00000107559	Gm44193	TEC	2.22131e-07
aggregated_scATAC_peak_67986	chr6	113795218	113795523	downstream	4314	1	ENSMUSG00000108297	Gm44167	sense_intronic	1.19112e-05
aggregated_scATAC_peak_68051	chr6	114777133	114777458	upstream	12094	1	ENSMUSG00000107395	Gm44331	processed_pseudogene	8.44279e-05
aggregated_scATAC_peak_68202	chr6	117251372	117251889	upstream	37564	1	ENSMUSG00000090549	Rpl28-ps4	processed_pseudogene	1.15444e-05
aggregated_scATAC_peak_68207	chr6	117508528	117509498	downstream	13778	1	ENSMUSG00000108020	6820426E19Rik	lincRNA	4.29468e-05
aggregated_scATAC_peak_68229	chr6	117966452	117967176	upstream	29122	1	ENSMUSG00000004988	Fxyd4	protein_coding	3.49545e-05
aggregated_scATAC_peak_68265	chr6	118907643	118908279	NA	NA	0,1	NA	NA	NA	2.3727e-07
aggregated_scATAC_peak_68277	chr6	119084504	119084867	NA	NA	0,1	NA	NA	NA	2.08628e-05
aggregated_scATAC_peak_68287	chr6	119196388	119196843	overlapStart	198	0	ENSMUSG00000051331	Cacna1c	protein_coding	9.6982e-06
aggregated_scATAC_peak_68288	chr6	119214490	119215217	upstream	18436	1	ENSMUSG00000051331	Cacna1c	protein_coding	5.03653e-05
aggregated_scATAC_peak_68447	chr6	121538003	121538238	overlapStart	76	0	ENSMUSG00000107923	Gm43922	processed_pseudogene	3.01683e-05
aggregated_scATAC_peak_68664	chr6	126685127	126685578	upstream	33332	1	ENSMUSG00000097596	Gm26673	antisense_RNA	2.74428e-06
aggregated_scATAC_peak_68759	chr6	128078547	128078941	downstream	16282	1	ENSMUSG00000076327	Gm26338	miRNA	8.92361e-06
aggregated_scATAC_peak_68760	chr6	128079784	128080251	downstream	15008	1	ENSMUSG00000076327	Gm26338	miRNA	6.00448e-06
aggregated_scATAC_peak_68816	chr6	128868950	128869779	upstream	4170	0	ENSMUSG00000107633	Gm44078	TEC	4.81125e-07
aggregated_scATAC_peak_69060	chr6	140102122	140102407	upstream	29803	1	ENSMUSG00000107407	Gm44159	processed_pseudogene	4.80085e-06
aggregated_scATAC_peak_69108	chr6	141336483	141336884	upstream	3869	0	ENSMUSG00000107456	Gm10400	TEC	7.86195e-05
aggregated_scATAC_peak_69175	chr6	143866388	143867455	NA	NA	0,1	NA	NA	NA	3.43104e-05
aggregated_scATAC_peak_69221	chr6	145063242	145063721	downstream	7093	1	ENSMUSG00000086643	Gm15687	antisense_RNA	3.96063e-05
aggregated_scATAC_peak_69337	chr6	147032961	147033464	PeakInsideFeature	628	0	ENSMUSG00000040121	Rep15	protein_coding	1.75542e-06
aggregated_scATAC_peak_69367	chr6	148467588	148468370	upstream	23590	1	ENSMUSG00000030306	Tmtc1	protein_coding	1.55101e-06
aggregated_scATAC_peak_69370	chr6	148539313	148539992	NA	NA	0,1	NA	NA	NA	6.55117e-05
aggregated_scATAC_peak_69401	chr6	149134247	149135368	downstream	4638	1	ENSMUSG00000067292	Gm10203	protein_coding	4.31989e-05
aggregated_scATAC_peak_69403	chr6	149153833	149155037	downstream	14586	1	ENSMUSG00000039958	Etfbkmt	protein_coding	1.22394e-07
aggregated_scATAC_peak_69427	chr7	3332650	3333391	overlapStart	65	0	ENSMUSG00000069806	Cacng7	protein_coding	3.54505e-05
aggregated_scATAC_peak_69566	chr7	6744361	6744923	downstream	1996	0	ENSMUSG00000109131	Gm44862	TEC	5.35135e-09
aggregated_scATAC_peak_69571	chr7	6777140	6778184	downstream	24619	1	ENSMUSG00000109416	Gm44863	TEC	1.48069e-05
aggregated_scATAC_peak_69584	chr7	6910064	6911262	downstream	10311	1	ENSMUSG00000109094	Gm44587	TEC	1.68608e-06
aggregated_scATAC_peak_69661	chr7	16172183	16172534	upstream	2732	0	ENSMUSG00000041420	Meis3	protein_coding	1.89026e-05
aggregated_scATAC_peak_69726	chr7	16876593	16877089	PeakInsideFeature	1524	0	ENSMUSG00000078794	Dact3	protein_coding	8.54348e-07
aggregated_scATAC_peak_70067	chr7	25636337	25636837	downstream	9933	1	ENSMUSG00000059479	B3gnt8	protein_coding	2.42459e-06
aggregated_scATAC_peak_70554	chr7	34988924	34989288	upstream	45121	1	ENSMUSG00000077469	Gm25922	snoRNA	9.71391e-06
aggregated_scATAC_peak_70629	chr7	36012125	36012415	NA	NA	0,1	NA	NA	NA	1.46031e-05
aggregated_scATAC_peak_70736	chr7	39954054	39954415	PeakInsideFeature	24085	1	ENSMUSG00000109083	Gm44992	lincRNA	2.18147e-05
aggregated_scATAC_peak_70746	chr7	40719119	40719373	downstream	44509	1	ENSMUSG00000102004	4933402C06Rik	lincRNA	3.00509e-05
aggregated_scATAC_peak_71134	chr7	48958570	48959284	upstream	18809	1	ENSMUSG00000109507	Gm18559	processed_pseudogene	4.00898e-06
aggregated_scATAC_peak_71139	chr7	49041568	49042041	downstream	20777	1	ENSMUSG00000109068	Gm45207	processed_pseudogene	4.66285e-06
aggregated_scATAC_peak_71163	chr7	49388123	49388731	downstream	42333	1	ENSMUSG00000109051	Gm44913	TEC	1.82304e-05
aggregated_scATAC_peak_71170	chr7	49450146	49451033	upstream	19122	1	ENSMUSG00000102148	Gm38059	TEC	2.2842e-08
aggregated_scATAC_peak_71379	chr7	64895662	64895989	upstream	22829	1	ENSMUSG00000070520	Nsmce3	protein_coding	7.11712e-05
aggregated_scATAC_peak_71493	chr7	66954020	66955025	downstream	7396	1	ENSMUSG00000109079	Gm44755	TEC	5.45252e-06
aggregated_scATAC_peak_71498	chr7	67031287	67031750	upstream	37091	1	ENSMUSG00000108873	Gm44609	processed_pseudogene	7.81396e-06
aggregated_scATAC_peak_71603	chr7	68945916	68946316	downstream	6120	1	ENSMUSG00000065940	Gm23795	snoRNA	7.59055e-06
aggregated_scATAC_peak_71637	chr7	70496556	70497276	downstream	6068	1	ENSMUSG00000097991	Gm7656	processed_pseudogene	1.07741e-07
aggregated_scATAC_peak_71647	chr7	70624128	70625610	upstream	13741	1	ENSMUSG00000109294	Gm44808	lincRNA	1.99114e-05
aggregated_scATAC_peak_71650	chr7	70668998	70670052	downstream	30915	1	ENSMUSG00000109294	Gm44808	lincRNA	3.32181e-05
aggregated_scATAC_peak_71657	chr7	70810079	70810954	NA	NA	0,1	NA	NA	NA	5.15583e-06
aggregated_scATAC_peak_71686	chr7	71533115	71533325	NA	NA	0,1	NA	NA	NA	8.41915e-05
aggregated_scATAC_peak_71689	chr7	71546645	71547151	NA	NA	0,1	NA	NA	NA	1.73969e-05
aggregated_scATAC_peak_71695	chr7	71943832	71944035	upstream	17239	1	ENSMUSG00000108800	1700011C11Rik	lincRNA	8.5246e-05
aggregated_scATAC_peak_71850	chr7	78121124	78121476	NA	NA	0,1	NA	NA	NA	5.82532e-05
aggregated_scATAC_peak_71889	chr7	79207201	79207473	NA	NA	0,1	NA	NA	NA	5.44129e-05
aggregated_scATAC_peak_72058	chr7	81058880	81059302	overlapStart	22	0	ENSMUSG00000085194	Platr32	sense_intronic	3.64205e-05
aggregated_scATAC_peak_72106	chr7	81726762	81726962	upstream	15483	1	ENSMUSG00000109519	Gm18806	processed_pseudogene	7.34304e-06
aggregated_scATAC_peak_72124	chr7	82011845	82012916	upstream	20088	1	ENSMUSG00000025105	Bnc1	protein_coding	1.23722e-07
aggregated_scATAC_peak_72137	chr7	82277679	82278292	NA	NA	0,1	NA	NA	NA	6.79877e-05
aggregated_scATAC_peak_72160	chr7	82890835	82891617	downstream	23893	1	ENSMUSG00000057706	Mex3b	protein_coding	3.65365e-05
aggregated_scATAC_peak_72185	chr7	83737912	83738698	PeakInsideFeature	7421	1	ENSMUSG00000001741	Il16	protein_coding	7.96449e-08
aggregated_scATAC_peak_72225	chr7	86215846	86216366	upstream	29510	1	ENSMUSG00000092419	Vmn2r-ps86	unprocessed_pseudogene	5.15864e-05
aggregated_scATAC_peak_72302	chr7	90395112	90395343	upstream	31349	1	ENSMUSG00000044362	Ccdc89	protein_coding	4.98072e-05
aggregated_scATAC_peak_72327	chr7	92457681	92458287	downstream	26814	1	ENSMUSG00000109031	Gm45201	TEC	2.24083e-07
aggregated_scATAC_peak_72333	chr7	92777239	92777749	upstream	1011	0	ENSMUSG00000109257	Gm45200	TEC	5.98662e-05
aggregated_scATAC_peak_72374	chr7	96510662	96510940	NA	NA	0,1	NA	NA	NA	1.0166e-06
aggregated_scATAC_peak_72375	chr7	96511097	96511335	NA	NA	0,1	NA	NA	NA	6.32714e-06
aggregated_scATAC_peak_72384	chr7	96587472	96587915	downstream	41375	1	ENSMUSG00000085792	Gm15414	antisense_RNA	5.2341e-05
aggregated_scATAC_peak_72388	chr7	96652112	96652337	upstream	23155	1	ENSMUSG00000085792	Gm15414	antisense_RNA	3.65346e-05
aggregated_scATAC_peak_72389	chr7	96655005	96655611	upstream	26239	1	ENSMUSG00000085792	Gm15414	antisense_RNA	7.37991e-06
aggregated_scATAC_peak_72391	chr7	96677060	96677477	upstream	48199	1	ENSMUSG00000085792	Gm15414	antisense_RNA	1.09198e-05
aggregated_scATAC_peak_72395	chr7	96773377	96774038	downstream	27841	1	ENSMUSG00000053049	Gm15413	antisense_RNA	8.18661e-09
aggregated_scATAC_peak_72414	chr7	97343004	97343236	PeakInsideFeature	10793	1	ENSMUSG00000044952	Kctd21	protein_coding	3.85074e-05
aggregated_scATAC_peak_72453	chr7	98149797	98150762	upstream	4778	0	ENSMUSG00000074006	Omp	protein_coding	6.95682e-05
aggregated_scATAC_peak_72545	chr7	99020494	99020713	NA	NA	0,1	NA	NA	NA	1.44446e-05
aggregated_scATAC_peak_72546	chr7	99020787	99021672	NA	NA	0,1	NA	NA	NA	5.83433e-06
aggregated_scATAC_peak_72705	chr7	100924710	100924992	PeakInsideFeature	7256	1	ENSMUSG00000032875	Arhgef17	protein_coding	7.15622e-05
aggregated_scATAC_peak_72865	chr7	107567192	107567664	overlapStart	18	0	ENSMUSG00000051041	Olfml1	protein_coding	9.41931e-05
aggregated_scATAC_peak_72870	chr7	107652537	107652813	upstream	27514	1	ENSMUSG00000049740	5330417H12Rik	protein_coding	1.72942e-05
aggregated_scATAC_peak_72876	chr7	107690388	107691217	NA	NA	0,1	NA	NA	NA	5.23599e-05
aggregated_scATAC_peak_72913	chr7	109191627	109192309	upstream	16761	1	ENSMUSG00000036111	Lmo1	protein_coding	8.9317e-05
aggregated_scATAC_peak_73015	chr7	110982339	110982714	overlapStart	65	0	ENSMUSG00000005611	Mrvi1	protein_coding	6.33268e-05
aggregated_scATAC_peak_73115	chr7	112656071	112656690	downstream	3598	1	ENSMUSG00000109611	Gm45473	processed_pseudogene	5.53695e-05
aggregated_scATAC_peak_73207	chr7	113909155	113910124	NA	NA	0,1	NA	NA	NA	3.93908e-06
aggregated_scATAC_peak_73215	chr7	114155336	114155941	upstream	37857	1	ENSMUSG00000055723	Rras2	protein_coding	6.20603e-08
aggregated_scATAC_peak_73216	chr7	114171106	114172026	downstream	37522	1	ENSMUSG00000110407	Gm45454	processed_pseudogene	2.70681e-06
aggregated_scATAC_peak_73240	chr7	115154134	115154531	upstream	17724	1	ENSMUSG00000108401	Rpl19-ps10	processed_pseudogene	6.15468e-05
aggregated_scATAC_peak_73241	chr7	115192542	115192779	downstream	20387	1	ENSMUSG00000099211	Gm27684	miRNA	9.80211e-05
aggregated_scATAC_peak_73257	chr7	115446606	115446944	NA	NA	0,1	NA	NA	NA	3.0249e-05
aggregated_scATAC_peak_73272	chr7	115702730	115703173	NA	NA	0,1	NA	NA	NA	6.43536e-07
aggregated_scATAC_peak_73301	chr7	116189745	116190104	NA	NA	0,1	NA	NA	NA	2.16641e-05
aggregated_scATAC_peak_73303	chr7	116193790	116194079	NA	NA	0,1	NA	NA	NA	3.36597e-05
aggregated_scATAC_peak_73310	chr7	116244433	116245168	downstream	38085	1	ENSMUSG00000108650	Gm44867	sense_intronic	1.83926e-08
aggregated_scATAC_peak_73354	chr7	117544022	117544769	NA	NA	0,1	NA	NA	NA	3.67472e-05
aggregated_scATAC_peak_73490	chr7	120906115	120906388	upstream	11492	1	ENSMUSG00000030880	Polr3e	protein_coding	9.78584e-05
aggregated_scATAC_peak_73616	chr7	125829460	125829959	NA	NA	0,1	NA	NA	NA	9.39988e-07
aggregated_scATAC_peak_73617	chr7	125865208	125865579	NA	NA	0,1	NA	NA	NA	1.32014e-05
aggregated_scATAC_peak_73622	chr7	125973739	125974244	NA	NA	0,1	NA	NA	NA	4.66042e-05
aggregated_scATAC_peak_73669	chr7	126628288	126628614	PeakInsideFeature	2410	0	ENSMUSG00000030717	Nupr1	protein_coding	5.58299e-05
aggregated_scATAC_peak_73769	chr7	127759538	127759952	upstream	10070	1	ENSMUSG00000043964	Orai3	protein_coding	4.13608e-07
aggregated_scATAC_peak_73806	chr7	128282618	128282876	downstream	5688	1	ENSMUSG00000093215	Mir3103	miRNA	8.60124e-06
aggregated_scATAC_peak_73822	chr7	128506195	128506708	upstream	6265	1	ENSMUSG00000108626	Gm40457	lincRNA	1.37211e-07
aggregated_scATAC_peak_73830	chr7	128591227	128592092	PeakInsideFeature	1683	0	ENSMUSG00000108795	Gm45121	lincRNA	7.00391e-07
aggregated_scATAC_peak_73864	chr7	129690262	129690819	PeakInsideFeature	23135	1	ENSMUSG00000108481	Gm33248	sense_intronic	1.31102e-06
aggregated_scATAC_peak_73869	chr7	129790388	129791418	upstream	42143	1	ENSMUSG00000108576	Gm44778	lincRNA	1.86379e-11
aggregated_scATAC_peak_73871	chr7	129805224	129805507	upstream	27680	1	ENSMUSG00000108576	Gm44778	lincRNA	8.69808e-06
aggregated_scATAC_peak_73882	chr7	130007962	130008896	upstream	26665	1	ENSMUSG00000065763	Gm23847	snRNA	1.64719e-06
aggregated_scATAC_peak_73902	chr7	130169620	130169820	NA	NA	0,1	NA	NA	NA	6.89399e-05
aggregated_scATAC_peak_73952	chr7	130780871	130781173	PeakInsideFeature	6953	1	ENSMUSG00000040298	Btbd16	protein_coding	1.66239e-06
aggregated_scATAC_peak_73967	chr7	130959929	130960625	PeakInsideFeature	24166	1	ENSMUSG00000006205	Htra1	protein_coding	6.66736e-08
aggregated_scATAC_peak_74042	chr7	132448288	132449124	downstream	17955	1	ENSMUSG00000108849	Gm35147	lincRNA	2.78316e-09
aggregated_scATAC_peak_74058	chr7	132616451	132617032	PeakInsideFeature	6104	1	ENSMUSG00000030946	Lhpp	protein_coding	1.09739e-05
aggregated_scATAC_peak_74111	chr7	133598914	133599514	PeakInsideFeature	2944	0	ENSMUSG00000030976	Tex36	protein_coding	3.4104e-07
aggregated_scATAC_peak_74133	chr7	133932966	133933175	downstream	6671	1	ENSMUSG00000093032	Gm23631	miRNA	2.90286e-05
aggregated_scATAC_peak_74134	chr7	133933370	133933778	downstream	6167	1	ENSMUSG00000093032	Gm23631	miRNA	1.97708e-06
aggregated_scATAC_peak_74135	chr7	133954108	133954423	upstream	14525	1	ENSMUSG00000093032	Gm23631	miRNA	6.06439e-06
aggregated_scATAC_peak_74144	chr7	134114406	134115172	upstream	14511	1	ENSMUSG00000108478	Gm19514	TEC	5.50639e-08
aggregated_scATAC_peak_74274	chr7	137490670	137491146	NA	NA	0,1	NA	NA	NA	5.8034e-06
aggregated_scATAC_peak_74279	chr7	137750900	137751875	downstream	17122	1	ENSMUSG00000110090	Gm45682	lincRNA	9.76858e-06
aggregated_scATAC_peak_74285	chr7	137930246	137930607	NA	NA	0,1	NA	NA	NA	5.31661e-06
aggregated_scATAC_peak_74327	chr7	139077359	139077661	upstream	8491	1	ENSMUSG00000025478	Dpysl4	protein_coding	4.54231e-05
aggregated_scATAC_peak_74356	chr7	139309013	139309524	upstream	12403	1	ENSMUSG00000110115	Gm32486	lincRNA	7.87214e-07
aggregated_scATAC_peak_74566	chr7	142326829	142327456	upstream	20848	1	ENSMUSG00000083812	Gm5054	processed_pseudogene	9.31964e-06
aggregated_scATAC_peak_74584	chr7	142470785	142471838	PeakInsideFeature	10503	1	ENSMUSG00000018819	Lsp1	protein_coding	9.96119e-05
aggregated_scATAC_peak_74588	chr7	142483185	142483592	upstream	15448	1	ENSMUSG00000061723	Tnnt3	protein_coding	2.31105e-06
aggregated_scATAC_peak_74590	chr7	142493457	142493840	upstream	5188	1	ENSMUSG00000061723	Tnnt3	protein_coding	5.23409e-07
aggregated_scATAC_peak_74605	chr7	142548788	142549048	PeakInsideFeature	9678	1	ENSMUSG00000087090	Nctc1	processed_transcript	3.73761e-06
aggregated_scATAC_peak_74607	chr7	142553786	142554395	PeakInsideFeature	4506	0	ENSMUSG00000087090	Nctc1	processed_transcript	4.66372e-06
aggregated_scATAC_peak_74609	chr7	142564872	142565563	upstream	6622	1	ENSMUSG00000087090	Nctc1	processed_transcript	7.93774e-08
aggregated_scATAC_peak_74640	chr7	142869547	142870035	upstream	12209	1	ENSMUSG00000108952	Gm39117	lincRNA	5.3725e-06
aggregated_scATAC_peak_74675	chr7	143395252	143395549	upstream	30775	1	ENSMUSG00000101360	4933417O13Rik	antisense_RNA	1.30916e-05
aggregated_scATAC_peak_74737	chr7	144102103	144102793	downstream	8637	1	ENSMUSG00000109500	Gm44999	TEC	2.56807e-07
aggregated_scATAC_peak_74757	chr7	144368311	144368979	PeakInsideFeature	38288	1	ENSMUSG00000085745	Gm14372	antisense_RNA	3.19393e-06
aggregated_scATAC_peak_74776	chr7	144661893	144662093	NA	NA	0,1	NA	NA	NA	6.39369e-06
aggregated_scATAC_peak_74932	chr8	8115839	8116459	downstream	49483	1	ENSMUSG00000109566	Gm31401	lincRNA	3.36557e-06
aggregated_scATAC_peak_74963	chr8	8870462	8870999	NA	NA	0,1	NA	NA	NA	1.62342e-05
aggregated_scATAC_peak_75037	chr8	10842755	10843094	downstream	23262	1	ENSMUSG00000108961	Gm32540	lincRNA	2.7097e-05
aggregated_scATAC_peak_75131	chr8	11749440	11749781	downstream	10989	1	ENSMUSG00000110394	Gm18991	processed_pseudogene	8.47324e-07
aggregated_scATAC_peak_75140	chr8	11859540	11859759	upstream	14509	1	ENSMUSG00000109772	Gm39132	lincRNA	1.66132e-05
aggregated_scATAC_peak_75324	chr8	15071333	15071965	PeakInsideFeature	13996	1	ENSMUSG00000031461	Myom2	protein_coding	3.33882e-05
aggregated_scATAC_peak_75479	chr8	23384167	23384368	upstream	27234	1	ENSMUSG00000031548	Sfrp1	protein_coding	2.67222e-05
aggregated_scATAC_peak_75488	chr8	23451805	23452703	downstream	40752	1	ENSMUSG00000031548	Sfrp1	protein_coding	1.60871e-07
aggregated_scATAC_peak_75527	chr8	24574702	24575080	PeakInsideFeature	1442	0	ENSMUSG00000031549	Ido2	protein_coding	3.64169e-05
aggregated_scATAC_peak_75546	chr8	25070247	25070876	upstream	30654	1	ENSMUSG00000110148	5830408C22Rik	processed_transcript	1.06183e-05
aggregated_scATAC_peak_75576	chr8	25343172	25343686	upstream	37159	1	ENSMUSG00000110140	5430421F17Rik	lincRNA	4.60436e-06
aggregated_scATAC_peak_75633	chr8	26352608	26352950	upstream	40445	1	ENSMUSG00000110229	Gm31784	lincRNA	8.07784e-05
aggregated_scATAC_peak_75656	chr8	26770319	26771195	upstream	9558	1	ENSMUSG00000110297	Gm45647	processed_pseudogene	1.75488e-09
aggregated_scATAC_peak_75675	chr8	26966973	26967303	PeakInsideFeature	704	0	ENSMUSG00000110345	Gm45572	lincRNA	7.46183e-06
aggregated_scATAC_peak_75694	chr8	27104263	27104633	PeakInsideFeature	18865	1	ENSMUSG00000031486	Adgra2	protein_coding	3.07144e-07
aggregated_scATAC_peak_75741	chr8	30941145	30941402	NA	NA	0,1	NA	NA	NA	3.38836e-05
aggregated_scATAC_peak_75779	chr8	32068682	32069533	NA	NA	0,1	NA	NA	NA	5.35186e-05
aggregated_scATAC_peak_75781	chr8	32110931	32111228	NA	NA	0,1	NA	NA	NA	1.48641e-05
aggregated_scATAC_peak_75834	chr8	33978333	33979175	upstream	7160	1	ENSMUSG00000110663	Gm39157	lincRNA	1.96469e-07
aggregated_scATAC_peak_75839	chr8	34074877	34075406	upstream	19406	1	ENSMUSG00000097257	Gm26768	lincRNA	6.11286e-07
aggregated_scATAC_peak_76004	chr8	36689037	36689867	NA	NA	0,1	NA	NA	NA	2.96505e-05
aggregated_scATAC_peak_76131	chr8	46094063	46094563	upstream	12946	1	ENSMUSG00000088629	Gm23030	misc_RNA	5.6604e-06
aggregated_scATAC_peak_76166	chr8	46892477	46893166	NA	NA	0,1	NA	NA	NA	1.2094e-09
aggregated_scATAC_peak_76236	chr8	48309054	48309678	upstream	38381	1	ENSMUSG00000110480	Gm32842	processed_pseudogene	4.05657e-06
aggregated_scATAC_peak_76254	chr8	48748373	48749079	NA	NA	0,1	NA	NA	NA	8.23531e-06
aggregated_scATAC_peak_76261	chr8	48912905	48913286	downstream	45385	1	ENSMUSG00000089548	Gm25830	snoRNA	7.05932e-07
aggregated_scATAC_peak_76272	chr8	54042311	54042953	upstream	34974	1	ENSMUSG00000031520	Vegfc	protein_coding	1.25981e-08
aggregated_scATAC_peak_76298	chr8	56706922	56707268	upstream	5954	1	ENSMUSG00000109760	Gm6503	processed_pseudogene	5.40712e-06
aggregated_scATAC_peak_76303	chr8	56932547	56932993	upstream	20059	1	ENSMUSG00000110043	Gm7328	processed_pseudogene	4.04385e-05
aggregated_scATAC_peak_76314	chr8	57333827	57334584	PeakInsideFeature	379	0	ENSMUSG00000109697	Gm34030	lincRNA	1.81144e-05
aggregated_scATAC_peak_76889	chr8	77681417	77682363	downstream	22199	1	ENSMUSG00000109866	Gm45714	TEC	3.93655e-09
aggregated_scATAC_peak_76902	chr8	77988331	77988725	NA	NA	0,1	NA	NA	NA	6.51335e-05
aggregated_scATAC_peak_76911	chr8	78117151	78117744	downstream	9488	1	ENSMUSG00000109948	Gm45288	processed_pseudogene	3.2281e-09
aggregated_scATAC_peak_76977	chr8	80182798	80183195	upstream	12203	1	ENSMUSG00000110294	Gm45430	lincRNA	4.20278e-05
aggregated_scATAC_peak_77074	chr8	83774121	83774602	downstream	21444	1	ENSMUSG00000084682	Gm22024	misc_RNA	8.45141e-05
aggregated_scATAC_peak_77145	chr8	84551404	84551854	NA	NA	0,1	NA	NA	NA	1.00007e-05
aggregated_scATAC_peak_77296	chr8	86935387	86935910	upstream	14501	1	ENSMUSG00000099162	Gm27168	lincRNA	2.02697e-07
aggregated_scATAC_peak_77308	chr8	87182396	87182634	PeakInsideFeature	17335	1	ENSMUSG00000099207	Gm10637	lincRNA	8.00908e-05
aggregated_scATAC_peak_77309	chr8	87199404	87200537	overlapStart	120	0	ENSMUSG00000099207	Gm10637	lincRNA	2.87851e-07
aggregated_scATAC_peak_77338	chr8	87727044	87727697	NA	NA	0,1	NA	NA	NA	3.17575e-06
aggregated_scATAC_peak_77340	chr8	87752810	87753028	NA	NA	0,1	NA	NA	NA	7.24348e-05
aggregated_scATAC_peak_77347	chr8	87831197	87832169	NA	NA	0,1	NA	NA	NA	6.04974e-05
aggregated_scATAC_peak_77348	chr8	87836884	87837264	NA	NA	0,1	NA	NA	NA	5.64553e-05
aggregated_scATAC_peak_77384	chr8	88282728	88282985	PeakInsideFeature	10453	1	ENSMUSG00000031659	Adcy7	protein_coding	5.86857e-05
aggregated_scATAC_peak_77404	chr8	88537933	88538452	PeakInsideFeature	16838	1	ENSMUSG00000031661	Nkd1	protein_coding	1.44446e-05
aggregated_scATAC_peak_77482	chr8	90192611	90193425	NA	NA	0,1	NA	NA	NA	1.48713e-05
aggregated_scATAC_peak_77484	chr8	90323520	90324411	PeakInsideFeature	24377	1	ENSMUSG00000043668	Tox3	protein_coding	2.48931e-05
aggregated_scATAC_peak_77547	chr8	91524176	91525717	downstream	7778	1	ENSMUSG00000109709	Gm45290	TEC	9.71473e-08
aggregated_scATAC_peak_77585	chr8	91876062	91876798	downstream	10559	1	ENSMUSG00000099664	Gm28511	lincRNA	1.97643e-06
aggregated_scATAC_peak_77671	chr8	93598629	93599199	PeakInsideFeature	29710	1	ENSMUSG00000110534	Gm45708	lincRNA	1.1825e-06
aggregated_scATAC_peak_77680	chr8	93839204	93840121	upstream	25940	1	ENSMUSG00000097520	4930488L21Rik	antisense_RNA	6.17003e-05
aggregated_scATAC_peak_77877	chr8	102742162	102742456	upstream	9825	1	ENSMUSG00000078006	Gm26301	miRNA	3.38836e-05
aggregated_scATAC_peak_77880	chr8	102784811	102785597	PeakInsideFeature	438	0	ENSMUSG00000031673	Cdh11	protein_coding	2.61872e-05
aggregated_scATAC_peak_77887	chr8	103408999	103409728	NA	NA	0,1	NA	NA	NA	2.07094e-07
aggregated_scATAC_peak_77900	chr8	104023109	104023502	upstream	47843	1	ENSMUSG00000110019	Gm8748	processed_pseudogene	5.87738e-05
aggregated_scATAC_peak_78062	chr8	106270884	106271414	upstream	12158	1	ENSMUSG00000074113	Gm10629	lincRNA	8.33168e-05
aggregated_scATAC_peak_78083	chr8	106518754	106519431	PeakInsideFeature	8201	1	ENSMUSG00000061048	Cdh3	protein_coding	2.13284e-07
aggregated_scATAC_peak_78199	chr8	108481182	108481932	NA	NA	0,1	NA	NA	NA	2.38454e-07
aggregated_scATAC_peak_78221	chr8	108762499	108763049	downstream	25181	1	ENSMUSG00000104292	Gm38042	TEC	8.31507e-05
aggregated_scATAC_peak_78407	chr8	112545049	112545366	downstream	24367	1	ENSMUSG00000098075	Gm26994	antisense_RNA	3.69987e-05
aggregated_scATAC_peak_78423	chr8	113763958	113764551	NA	NA	0,1	NA	NA	NA	7.26082e-05
aggregated_scATAC_peak_78431	chr8	113833774	113834013	PeakInsideFeature	14844	1	ENSMUSG00000053399	Adamts18	protein_coding	4.36643e-06
aggregated_scATAC_peak_78436	chr8	113978755	113979209	NA	NA	0,1	NA	NA	NA	4.65664e-07
aggregated_scATAC_peak_78457	chr8	114707457	114707935	PeakInsideFeature	310	0	ENSMUSG00000089797	Gm16118	antisense_RNA	1.07683e-06
aggregated_scATAC_peak_78564	chr8	117414137	117414357	upstream	38776	1	ENSMUSG00000099062	Mir7077	miRNA	3.74853e-06
aggregated_scATAC_peak_78686	chr8	120004041	120004680	PeakInsideFeature	11922	1	ENSMUSG00000031825	Crispld2	protein_coding	2.56901e-06
aggregated_scATAC_peak_78708	chr8	120211043	120211870	PeakInsideFeature	16774	1	ENSMUSG00000097960	A330074K22Rik	lincRNA	9.22055e-05
aggregated_scATAC_peak_78709	chr8	120216787	120217788	PeakInsideFeature	10942	1	ENSMUSG00000097960	A330074K22Rik	lincRNA	3.29318e-06
aggregated_scATAC_peak_78714	chr8	120251246	120251668	PeakInsideFeature	23001	1	ENSMUSG00000031822	Gse1	protein_coding	5.65321e-05
aggregated_scATAC_peak_78723	chr8	120298645	120298845	NA	NA	0,1	NA	NA	NA	7.98218e-06
aggregated_scATAC_peak_78738	chr8	120391814	120392247	NA	NA	0,1	NA	NA	NA	9.09089e-05
aggregated_scATAC_peak_78818	chr8	120821410	120822110	NA	NA	0,1	NA	NA	NA	3.78979e-07
aggregated_scATAC_peak_78821	chr8	120831983	120832479	upstream	47975	1	ENSMUSG00000097087	Gm26878	lincRNA	1.73857e-05
aggregated_scATAC_peak_78822	chr8	120832804	120833632	upstream	46988	1	ENSMUSG00000097087	Gm26878	lincRNA	3.80681e-08
aggregated_scATAC_peak_78826	chr8	120860324	120861198	upstream	19445	1	ENSMUSG00000097087	Gm26878	lincRNA	2.21474e-08
aggregated_scATAC_peak_78831	chr8	120887924	120888165	downstream	7838	1	ENSMUSG00000097087	Gm26878	lincRNA	4.349e-07
aggregated_scATAC_peak_78833	chr8	120894552	120895911	downstream	15026	1	ENSMUSG00000097087	Gm26878	lincRNA	5.05251e-09
aggregated_scATAC_peak_78838	chr8	120937361	120937891	NA	NA	0,1	NA	NA	NA	3.08483e-05
aggregated_scATAC_peak_78839	chr8	120938618	120938952	NA	NA	0,1	NA	NA	NA	9.13934e-08
aggregated_scATAC_peak_78851	chr8	120993695	120994236	upstream	8961	1	ENSMUSG00000101886	Gm28324	lincRNA	8.954e-05
aggregated_scATAC_peak_78853	chr8	121002819	121003131	overlapStart	48	0	ENSMUSG00000101886	Gm28324	lincRNA	1.19112e-05
aggregated_scATAC_peak_78857	chr8	121026085	121026558	downstream	23395	1	ENSMUSG00000101886	Gm28324	lincRNA	3.72703e-05
aggregated_scATAC_peak_78863	chr8	121083056	121084866	overlapStart	425	0	ENSMUSG00000042812	Foxf1	protein_coding	8.18951e-10
aggregated_scATAC_peak_78921	chr8	121450272	121450543	downstream	15428	1	ENSMUSG00000097438	Gm26784	lincRNA	7.96831e-05
aggregated_scATAC_peak_78986	chr8	122018566	122018777	downstream	40648	1	ENSMUSG00000099140	Mir7237	miRNA	8.72478e-06
aggregated_scATAC_peak_78996	chr8	122074020	122075220	NA	NA	0,1	NA	NA	NA	4.61239e-08
aggregated_scATAC_peak_78997	chr8	122080339	122080960	NA	NA	0,1	NA	NA	NA	1.13328e-09
aggregated_scATAC_peak_79009	chr8	122181238	122181938	NA	NA	0,1	NA	NA	NA	4.75632e-06
aggregated_scATAC_peak_79047	chr8	122451433	122451828	upstream	308	0	ENSMUSG00000110656	Gm20735	lincRNA	7.41549e-09
aggregated_scATAC_peak_79074	chr8	122660968	122661481	downstream	22615	1	ENSMUSG00000085917	Gm15899	processed_pseudogene	2.50182e-05
aggregated_scATAC_peak_79246	chr8	124392322	124392893	downstream	35370	1	ENSMUSG00000064664	Gm24459	snRNA	6.91185e-06
aggregated_scATAC_peak_79321	chr8	125349286	125349997	NA	NA	0,1	NA	NA	NA	2.65816e-06
aggregated_scATAC_peak_79345	chr8	125620385	125620757	PeakInsideFeature	35939	1	ENSMUSG00000110629	4930567H12Rik	lincRNA	1.23681e-06
aggregated_scATAC_peak_79346	chr8	125638394	125638637	upstream	31302	1	ENSMUSG00000050930	Map10	protein_coding	2.72842e-06
aggregated_scATAC_peak_79428	chr8	126744719	126745460	downstream	13244	1	ENSMUSG00000110626	Gm45805	lincRNA	4.03321e-06
aggregated_scATAC_peak_79495	chr8	128002400	128002948	NA	NA	0,1	NA	NA	NA	4.35855e-08
aggregated_scATAC_peak_79503	chr8	128234736	128235337	downstream	43189	1	ENSMUSG00000099326	Mir21c	miRNA	3.78029e-07
aggregated_scATAC_peak_79561	chr9	6912031	6912319	NA	NA	0,1	NA	NA	NA	2.42753e-06
aggregated_scATAC_peak_79690	chr9	14589512	14589955	downstream	29831	1	ENSMUSG00000111540	4930584E12Rik	TEC	1.32362e-05
aggregated_scATAC_peak_79701	chr9	14684424	14684814	downstream	4649	1	ENSMUSG00000111330	Gm19790	processed_pseudogene	8.26334e-06
aggregated_scATAC_peak_79767	chr9	18720959	18721619	downstream	42161	1	ENSMUSG00000089277	Gm24546	snRNA	2.59961e-05
aggregated_scATAC_peak_79992	chr9	24811429	24811976	downstream	15643	1	ENSMUSG00000111507	Amd-ps6	processed_pseudogene	7.70883e-05
aggregated_scATAC_peak_79997	chr9	24874240	24874872	upstream	47211	1	ENSMUSG00000111507	Amd-ps6	processed_pseudogene	7.01428e-05
aggregated_scATAC_peak_80005	chr9	24974040	24975150	overlapStart	387	0	ENSMUSG00000111866	E130101E03Rik	lincRNA	3.2706e-06
aggregated_scATAC_peak_80007	chr9	25090765	25091686	downstream	1804	0	ENSMUSG00000066810	Gm10181	protein_coding	7.21889e-05
aggregated_scATAC_peak_80025	chr9	25526672	25527480	downstream	12129	1	ENSMUSG00000088876	Gm25861	snoRNA	1.07679e-08
aggregated_scATAC_peak_80081	chr9	28999877	29000394	upstream	45789	1	ENSMUSG00000110741	AC166352.1	antisense_RNA	1.43712e-05
aggregated_scATAC_peak_80274	chr9	32823804	32824127	PeakInsideFeature	10232	1	ENSMUSG00000099148	Gm3331	lincRNA	2.19106e-05
aggregated_scATAC_peak_80281	chr9	32986851	32987265	downstream	16021	1	ENSMUSG00000102184	Gm37192	TEC	1.20031e-07
aggregated_scATAC_peak_80282	chr9	32987439	32987697	downstream	16531	1	ENSMUSG00000102184	Gm37192	TEC	9.80211e-05
aggregated_scATAC_peak_80316	chr9	34951130	34951579	upstream	8665	1	ENSMUSG00000089465	Gm23702	rRNA	7.45032e-07
aggregated_scATAC_peak_80347	chr9	35344145	35344817	downstream	18632	1	ENSMUSG00000103259	2610105M22Rik	TEC	6.82944e-05
aggregated_scATAC_peak_80387	chr9	36976683	36977390	upstream	38722	1	ENSMUSG00000093721	Gm3896	antisense_RNA	9.76811e-08
aggregated_scATAC_peak_80390	chr9	37029989	37031034	downstream	4113	1	ENSMUSG00000077401	n-R5s82	rRNA	9.04233e-09
aggregated_scATAC_peak_80392	chr9	37053889	37054747	downstream	27919	1	ENSMUSG00000077401	n-R5s82	rRNA	1.54225e-05
aggregated_scATAC_peak_80485	chr9	40685708	40686729	overlapStart	256	0	ENSMUSG00000032024	Clmp	protein_coding	1.87739e-05
aggregated_scATAC_peak_80490	chr9	40730481	40731648	upstream	11078	1	ENSMUSG00000086014	Gm16095	antisense_RNA	1.75677e-06
aggregated_scATAC_peak_80657	chr9	43252731	43253027	PeakInsideFeature	9280	1	ENSMUSG00000095385	D630033O11Rik	lincRNA	3.87276e-05
aggregated_scATAC_peak_80658	chr9	43253195	43253717	PeakInsideFeature	9857	1	ENSMUSG00000095385	D630033O11Rik	lincRNA	8.72478e-06
aggregated_scATAC_peak_80674	chr9	43398622	43399266	downstream	42671	1	ENSMUSG00000110823	Gm36799	lincRNA	2.39104e-10
aggregated_scATAC_peak_80699	chr9	43754685	43755401	upstream	8943	1	ENSMUSG00000111334	AC162938.2	processed_transcript	4.53187e-08
aggregated_scATAC_peak_80700	chr9	43757802	43758499	upstream	12050	1	ENSMUSG00000111334	AC162938.2	processed_transcript	6.83053e-05
aggregated_scATAC_peak_80702	chr9	43768759	43769130	upstream	22844	1	ENSMUSG00000111334	AC162938.2	processed_transcript	8.60218e-05
aggregated_scATAC_peak_80713	chr9	43843641	43844218	downstream	22983	1	ENSMUSG00000096322	Gm3898	lincRNA	1.22956e-05
aggregated_scATAC_peak_80732	chr9	43993119	43994112	overlapStart	368	0	ENSMUSG00000111283	E230034D01Rik	processed_transcript	5.43004e-10
aggregated_scATAC_peak_80879	chr9	45861801	45862045	upstream	1241	0	ENSMUSG00000111128	AC126804.1	TEC	5.21441e-05
aggregated_scATAC_peak_80955	chr9	47376592	47377206	upstream	8250	1	ENSMUSG00000109844	Gm31816	lincRNA	4.84195e-07
aggregated_scATAC_peak_80999	chr9	47894592	47895732	NA	NA	0,1	NA	NA	NA	7.10753e-06
aggregated_scATAC_peak_81201	chr9	52237095	52237368	NA	NA	0,1	NA	NA	NA	3.85074e-05
aggregated_scATAC_peak_81280	chr9	54783932	54784559	downstream	19498	1	ENSMUSG00000032291	Crabp1	protein_coding	2.71893e-06
aggregated_scATAC_peak_81531	chr9	58295771	58296448	PeakInsideFeature	17076	1	ENSMUSG00000032334	Loxl1	protein_coding	2.33806e-05
aggregated_scATAC_peak_81537	chr9	58326375	58327038	upstream	13520	1	ENSMUSG00000032334	Loxl1	protein_coding	7.07861e-05
aggregated_scATAC_peak_81540	chr9	58378830	58379248	downstream	8535	1	ENSMUSG00000100487	1700072B07Rik	lincRNA	7.57529e-05
aggregated_scATAC_peak_81559	chr9	58802662	58803395	upstream	20384	1	ENSMUSG00000032338	Hcn4	protein_coding	2.6576e-10
aggregated_scATAC_peak_81620	chr9	60024654	60025697	downstream	17003	1	ENSMUSG00000088090	Gm23668	rRNA	4.74136e-07
aggregated_scATAC_peak_81638	chr9	60350963	60351455	downstream	17067	1	ENSMUSG00000111296	2010001M07Rik	antisense_RNA	2.95667e-05
aggregated_scATAC_peak_81645	chr9	60513367	60513825	PeakInsideFeature	8450	1	ENSMUSG00000032289	Thsd4	protein_coding	7.09651e-06
aggregated_scATAC_peak_81646	chr9	60517107	60517613	PeakInsideFeature	4686	0	ENSMUSG00000032289	Thsd4	protein_coding	3.07262e-05
aggregated_scATAC_peak_81669	chr9	60787446	60788317	upstream	6660	1	ENSMUSG00000034485	Uaca	protein_coding	7.07758e-05
aggregated_scATAC_peak_81698	chr9	61199826	61200816	upstream	6358	1	ENSMUSG00000111449	Gm34105	lincRNA	2.38298e-06
aggregated_scATAC_peak_81718	chr9	61325706	61326252	upstream	32170	1	ENSMUSG00000111658	B930092H01Rik	lincRNA	5.24557e-05
aggregated_scATAC_peak_81762	chr9	61739148	61739392	upstream	23814	1	ENSMUSG00000111739	AC153363.1	processed_pseudogene	1.5374e-06
aggregated_scATAC_peak_81991	chr9	64114399	64115167	upstream	2364	0	ENSMUSG00000032401	Lctl	protein_coding	1.02415e-05
aggregated_scATAC_peak_82108	chr9	65613034	65613657	upstream	16302	1	ENSMUSG00000032387	Rbpms2	protein_coding	8.16308e-08
aggregated_scATAC_peak_82217	chr9	67099006	67099774	upstream	2910	0	ENSMUSG00000111825	Gm10646	lincRNA	4.97886e-06
aggregated_scATAC_peak_82244	chr9	67463372	67464251	downstream	39309	1	ENSMUSG00000111412	AC107740.1	antisense_RNA	2.27183e-06
aggregated_scATAC_peak_82466	chr9	71674587	71674945	NA	NA	0,1	NA	NA	NA	4.28297e-06
aggregated_scATAC_peak_82468	chr9	71676934	71677702	NA	NA	0,1	NA	NA	NA	3.82908e-05
aggregated_scATAC_peak_82537	chr9	72779061	72781067	upstream	3839	0	ENSMUSG00000098294	Gm27204	lincRNA	1.76091e-05
aggregated_scATAC_peak_82654	chr9	76007360	76008190	upstream	7080	1	ENSMUSG00000007908	Hmgcll1	protein_coding	7.44653e-07
aggregated_scATAC_peak_82673	chr9	77340181	77340768	PeakInsideFeature	12495	1	ENSMUSG00000032355	Mlip	protein_coding	1.59912e-05
aggregated_scATAC_peak_82683	chr9	77472593	77472878	NA	NA	0,1	NA	NA	NA	9.88749e-05
aggregated_scATAC_peak_82691	chr9	77604155	77604454	downstream	26590	1	ENSMUSG00000093211	Gm25250	miRNA	7.3258e-06
aggregated_scATAC_peak_82847	chr9	85178944	85179153	NA	NA	0,1	NA	NA	NA	5.37625e-05
aggregated_scATAC_peak_82874	chr9	86599245	86600255	downstream	27759	1	ENSMUSG00000032417	Rwdd2a	protein_coding	4.31326e-07
aggregated_scATAC_peak_82902	chr9	87607873	87608573	NA	NA	0,1	NA	NA	NA	1.27051e-05
aggregated_scATAC_peak_82903	chr9	87618237	87618807	NA	NA	0,1	NA	NA	NA	4.65365e-06
aggregated_scATAC_peak_83117	chr9	97826076	97826847	NA	NA	0,1	NA	NA	NA	6.59628e-06
aggregated_scATAC_peak_83259	chr9	101422068	101422280	downstream	13871	1	ENSMUSG00000101550	Gm29385	processed_pseudogene	9.54379e-05
aggregated_scATAC_peak_83262	chr9	101546254	101546818	NA	NA	0,1	NA	NA	NA	5.30721e-05
aggregated_scATAC_peak_83263	chr9	101555342	101555573	NA	NA	0,1	NA	NA	NA	1.62176e-05
aggregated_scATAC_peak_83423	chr9	103805416	103805856	upstream	43799	1	ENSMUSG00000042757	Tmem108	protein_coding	2.26089e-05
aggregated_scATAC_peak_83451	chr9	104582654	104583170	PeakInsideFeature	35626	1	ENSMUSG00000032564	Cpne4	protein_coding	8.99381e-06
aggregated_scATAC_peak_83453	chr9	104630663	104630968	NA	NA	0,1	NA	NA	NA	4.39784e-05
aggregated_scATAC_peak_83511	chr9	106356294	106356620	upstream	12175	1	ENSMUSG00000053716	Dusp7	protein_coding	8.18134e-06
aggregated_scATAC_peak_83648	chr9	107959960	107960169	PeakInsideFeature	9928	1	ENSMUSG00000032586	Traip	protein_coding	9.86858e-05
aggregated_scATAC_peak_83934	chr9	114799380	114799858	upstream	17763	1	ENSMUSG00000032436	Cmtm7	protein_coding	8.07293e-05
aggregated_scATAC_peak_83973	chr9	115349194	115349431	upstream	32507	1	ENSMUSG00000080409	Mir467h	miRNA	6.26994e-06
aggregated_scATAC_peak_83977	chr9	115451875	115452181	upstream	13447	1	ENSMUSG00000074034	Gm5921	processed_pseudogene	6.26994e-06
aggregated_scATAC_peak_84045	chr9	117669363	117670083	upstream	39810	1	ENSMUSG00000039607	Rbms3	protein_coding	5.30214e-06
aggregated_scATAC_peak_84047	chr9	117872083	117873106	overlapStart	10	0	ENSMUSG00000110408	Gm45881	lincRNA	6.4366e-05
aggregated_scATAC_peak_84079	chr9	118660046	118660627	NA	NA	0,1	NA	NA	NA	3.08536e-08
aggregated_scATAC_peak_84092	chr9	118838764	118839459	upstream	1157	0	ENSMUSG00000066270	Gm10157	processed_pseudogene	2.30153e-05
aggregated_scATAC_peak_84265	chr9	121023199	121023799	NA	NA	0,1	NA	NA	NA	9.68054e-06
aggregated_scATAC_peak_84355	chr9	122048078	122048629	PeakInsideFeature	1266	0	ENSMUSG00000111785	Gm39464	lincRNA	1.90538e-08
aggregated_scATAC_peak_84368	chr9	122233721	122234303	downstream	40016	1	ENSMUSG00000098922	Mir8106	miRNA	3.06799e-08
aggregated_scATAC_peak_84467	chr9	124482360	124482908	upstream	5736	1	ENSMUSG00000093803	Ppp2r3d	protein_coding	1.89885e-06
aggregated_scATAC_peak_5504	chr10	3346392	3346679	upstream	19521	1	ENSMUSG00000040653	Ppp1r14c	protein_coding	2.40246e-05
aggregated_scATAC_peak_5507	chr10	3414845	3415198	upstream	10001	1	ENSMUSG00000080655	Gm24482	miRNA	8.79917e-08
aggregated_scATAC_peak_5547	chr10	4305994	4306518	PeakInsideFeature	39876	1	ENSMUSG00000038587	Akap12	protein_coding	3.23231e-06
aggregated_scATAC_peak_5558	chr10	4473522	4473798	upstream	8842	1	ENSMUSG00000019767	Ccdc170	protein_coding	1.72382e-05
aggregated_scATAC_peak_5757	chr10	13116898	13117665	upstream	25465	1	ENSMUSG00000098635	Gm27741	misc_RNA	9.17494e-05
aggregated_scATAC_peak_5766	chr10	13259230	13259430	NA	NA	0,1	NA	NA	NA	2.09204e-05
aggregated_scATAC_peak_5768	chr10	13280358	13280813	NA	NA	0,1	NA	NA	NA	3.90364e-07
aggregated_scATAC_peak_5769	chr10	13280949	13281149	NA	NA	0,1	NA	NA	NA	1.12994e-05
aggregated_scATAC_peak_5777	chr10	13436280	13436678	PeakInsideFeature	37933	1	ENSMUSG00000062866	Phactr2	protein_coding	3.00855e-05
aggregated_scATAC_peak_6080	chr10	22908699	22908955	downstream	47757	1	ENSMUSG00000112091	AC153553.1	processed_pseudogene	1.77244e-05
aggregated_scATAC_peak_6236	chr10	28311407	28311674	NA	NA	0,1	NA	NA	NA	3.6491e-06
aggregated_scATAC_peak_6286	chr10	31028043	31028436	PeakInsideFeature	38004	1	ENSMUSG00000111778	Gm30676	lincRNA	3.34865e-05
aggregated_scATAC_peak_6316	chr10	34091800	34092187	PeakInsideFeature	4525	0	ENSMUSG00000049872	Fam26e	protein_coding	3.21355e-07
aggregated_scATAC_peak_6329	chr10	34316556	34317456	upstream	18099	1	ENSMUSG00000097274	AC113059.1	antisense_RNA	1.07417e-05
aggregated_scATAC_peak_6332	chr10	34479742	34480512	upstream	3272	0	ENSMUSG00000019779	Frk	protein_coding	8.6262e-05
aggregated_scATAC_peak_6362	chr10	37636983	37637474	NA	NA	0,1	NA	NA	NA	9.87385e-06
aggregated_scATAC_peak_6400	chr10	39534296	39534893	downstream	23468	1	ENSMUSG00000087014	Gm16364	antisense_RNA	1.65477e-05
aggregated_scATAC_peak_6445	chr10	40312251	40312596	upstream	10238	1	ENSMUSG00000075232	Amd1	protein_coding	2.38819e-05
aggregated_scATAC_peak_6459	chr10	40637339	40637732	PeakInsideFeature	7525	1	ENSMUSG00000063428	Ddo	protein_coding	3.40928e-07
aggregated_scATAC_peak_6485	chr10	41260138	41260954	PeakInsideFeature	42714	1	ENSMUSG00000038417	Fig4	protein_coding	2.24185e-05
aggregated_scATAC_peak_6505	chr10	41573164	41573869	PeakInsideFeature	5500	1	ENSMUSG00000091370	5730435O14Rik	processed_transcript	1.08621e-05
aggregated_scATAC_peak_6607	chr10	43033970	43034478	upstream	769	0	ENSMUSG00000111171	AC112265.1	antisense_RNA	1.72164e-05
aggregated_scATAC_peak_6734	chr10	45229671	45230418	upstream	17043	1	ENSMUSG00000098418	Gm27723	snRNA	3.0026e-09
aggregated_scATAC_peak_6800	chr10	51970198	51970427	overlapStart	21	0	ENSMUSG00000112659	Gm40646	lincRNA	2.1481e-05
aggregated_scATAC_peak_6834	chr10	53444824	53445248	upstream	29928	1	ENSMUSG00000056219	Tmem229b-ps	processed_pseudogene	2.32839e-05
aggregated_scATAC_peak_6851	chr10	54058700	54059621	upstream	4651	0	ENSMUSG00000112824	AC164624.1	antisense_RNA	2.24168e-06
aggregated_scATAC_peak_6876	chr10	56920881	56921755	upstream	6553	1	ENSMUSG00000112837	AC153945.1	lincRNA	5.52193e-08
aggregated_scATAC_peak_6904	chr10	58621163	58621491	NA	NA	0,1	NA	NA	NA	9.24388e-06
aggregated_scATAC_peak_6911	chr10	58797763	58797966	downstream	15278	1	ENSMUSG00000055958	Gm9987	pseudogene	6.39369e-06
aggregated_scATAC_peak_7015	chr10	60362356	60362648	PeakInsideFeature	15651	1	ENSMUSG00000020101	Vsir	protein_coding	1.42115e-06
aggregated_scATAC_peak_7064	chr10	60936757	60937752	PeakInsideFeature	878	0	ENSMUSG00000037247	Pldi	lincRNA	9.24322e-07
aggregated_scATAC_peak_7093	chr10	61226696	61227190	PeakInsideFeature	46495	1	ENSMUSG00000059901	Adamts14	protein_coding	1.30337e-07
aggregated_scATAC_peak_7141	chr10	61823026	61823984	upstream	39358	1	ENSMUSG00000020086	H2afy2	protein_coding	2.60991e-06
aggregated_scATAC_peak_7145	chr10	61848684	61848933	NA	NA	0,1	NA	NA	NA	5.57242e-06
aggregated_scATAC_peak_7225	chr10	62843638	62844361	downstream	15994	1	ENSMUSG00000112309	AC166359.1	TEC	3.46331e-05
aggregated_scATAC_peak_7264	chr10	66615968	66616757	upstream	24556	1	ENSMUSG00000101338	Gm28139	lincRNA	1.73379e-10
aggregated_scATAC_peak_7377	chr10	69583866	69584482	upstream	17813	1	ENSMUSG00000112729	Gm46231	processed_pseudogene	1.98752e-06
aggregated_scATAC_peak_7528	chr10	75328162	75328711	PeakInsideFeature	11559	1	ENSMUSG00000020178	Adora2a	protein_coding	4.97072e-08
aggregated_scATAC_peak_7687	chr10	77498331	77498802	PeakInsideFeature	11902	1	ENSMUSG00000097811	2810425M01Rik	lincRNA	4.10869e-05
aggregated_scATAC_peak_8222	chr10	83895578	83895998	upstream	6064	1	ENSMUSG00000112133	AC153505.2	processed_pseudogene	8.28531e-06
aggregated_scATAC_peak_8260	chr10	84477568	84478356	upstream	10331	1	ENSMUSG00000020033	4930463O16Rik	lincRNA	8.29241e-05
aggregated_scATAC_peak_8302	chr10	85141414	85141803	upstream	13581	1	ENSMUSG00000049038	Mterf2	protein_coding	8.75469e-06
aggregated_scATAC_peak_8350	chr10	86334304	86335091	PeakInsideFeature	34326	1	ENSMUSG00000020044	Timp3	protein_coding	4.24157e-05
aggregated_scATAC_peak_8352	chr10	86365572	86366057	NA	NA	0,1	NA	NA	NA	7.63206e-06
aggregated_scATAC_peak_8354	chr10	86381712	86382378	NA	NA	0,1	NA	NA	NA	1.06888e-05
aggregated_scATAC_peak_8361	chr10	86479884	86480309	PeakInsideFeature	18800	1	ENSMUSG00000059602	Syn3	protein_coding	6.22688e-05
aggregated_scATAC_peak_8405	chr10	87812221	87813173	upstream	45568	1	ENSMUSG00000020053	Igf1	protein_coding	2.44332e-06
aggregated_scATAC_peak_8418	chr10	88321100	88321428	upstream	11132	1	ENSMUSG00000112715	AC125486.1	processed_pseudogene	9.39071e-05
aggregated_scATAC_peak_8448	chr10	89491408	89491651	PeakInsideFeature	42055	1	ENSMUSG00000047638	Nr1h4	protein_coding	1.60398e-05
aggregated_scATAC_peak_8554	chr10	93647863	93648390	PeakInsideFeature	7445	1	ENSMUSG00000020019	Ntn4	protein_coding	1.69202e-07
aggregated_scATAC_peak_8631	chr10	95221925	95222144	NA	NA	0,1	NA	NA	NA	1.06183e-05
aggregated_scATAC_peak_8821	chr10	103000800	103001332	PeakInsideFeature	29149	1	ENSMUSG00000036602	Alx1	protein_coding	4.18249e-07
aggregated_scATAC_peak_8861	chr10	107946424	107946809	overlapStart	29	0	ENSMUSG00000112910	Gm29685	lincRNA	1.35233e-06
aggregated_scATAC_peak_8920	chr10	110585987	110586363	upstream	10091	1	ENSMUSG00000112398	9230102K24Rik	lincRNA	5.26198e-05
aggregated_scATAC_peak_8937	chr10	110929794	110930229	PeakInsideFeature	10223	1	ENSMUSG00000020186	Csrp2	protein_coding	9.21596e-05
aggregated_scATAC_peak_9066	chr10	116364708	116365219	downstream	24381	1	ENSMUSG00000065086	Gm26495	snoRNA	6.26351e-06
aggregated_scATAC_peak_9134	chr10	117462075	117462452	upstream	14771	1	ENSMUSG00000112344	Gm32141	lincRNA	9.93923e-06
aggregated_scATAC_peak_9173	chr10	117947180	117947594	PeakInsideFeature	21928	1	ENSMUSG00000112500	4933411E08Rik	lincRNA	3.86921e-07
aggregated_scATAC_peak_9307	chr10	120706433	120707276	upstream	7651	1	ENSMUSG00000112716	4930471E19Rik	lincRNA	4.37239e-05
aggregated_scATAC_peak_9310	chr10	120717151	120717726	upstream	14377	1	ENSMUSG00000103017	Gm37505	TEC	3.50846e-05
aggregated_scATAC_peak_9318	chr10	120760619	120761000	upstream	4922	0	ENSMUSG00000044544	4921513I03Rik	lincRNA	4.33527e-06
aggregated_scATAC_peak_9333	chr10	121016491	121017490	upstream	15929	1	ENSMUSG00000112192	AC140381.1	lincRNA	9.1415e-06
aggregated_scATAC_peak_9403	chr10	122025229	122025866	PeakInsideFeature	21767	1	ENSMUSG00000020121	Srgap1	protein_coding	4.93558e-05
aggregated_scATAC_peak_9973	chr11	5892274	5893325	downstream	5982	1	ENSMUSG00000020469	Myl7	protein_coding	2.92351e-08
aggregated_scATAC_peak_10102	chr11	8716834	8717255	NA	NA	0,1	NA	NA	NA	9.98139e-06
aggregated_scATAC_peak_10150	chr11	11831852	11832798	upstream	23363	1	ENSMUSG00000035455	Fignl1	protein_coding	1.29821e-07
aggregated_scATAC_peak_10154	chr11	11867854	11868730	overlapStart	169	0	ENSMUSG00000086391	1700042O10Rik	antisense_RNA	5.23401e-05
aggregated_scATAC_peak_10160	chr11	11901465	11901872	upstream	3524	0	ENSMUSG00000020182	Ddc	protein_coding	6.35177e-06
aggregated_scATAC_peak_10203	chr11	16865027	16865513	upstream	34568	1	ENSMUSG00000085091	Egfros	antisense_RNA	9.15051e-07
aggregated_scATAC_peak_10239	chr11	18930833	18931374	upstream	41264	1	ENSMUSG00000104244	2900018N21Rik	TEC	6.78648e-07
aggregated_scATAC_peak_10267	chr11	19651553	19651809	upstream	23620	1	ENSMUSG00000086911	Gm12027	lincRNA	1.75542e-06
aggregated_scATAC_peak_10273	chr11	19740547	19741036	downstream	9274	1	ENSMUSG00000083601	Gm12028	processed_pseudogene	1.56343e-06
aggregated_scATAC_peak_10289	chr11	19966265	19966820	PeakInsideFeature	42167	1	ENSMUSG00000045671	Spred2	protein_coding	1.80699e-05
aggregated_scATAC_peak_10371	chr11	21399133	21399389	upstream	28060	1	ENSMUSG00000001891	Ugp2	protein_coding	3.83544e-06
aggregated_scATAC_peak_10522	chr11	29636913	29637266	PeakInsideFeature	8419	1	ENSMUSG00000084850	Gm12092	lincRNA	1.2057e-06
aggregated_scATAC_peak_10531	chr11	29946493	29946840	upstream	35748	1	ENSMUSG00000080906	Gm12095	processed_pseudogene	1.35874e-05
aggregated_scATAC_peak_10742	chr11	34909870	34910264	downstream	11050	1	ENSMUSG00000064577	Gm25799	snRNA	7.39607e-05
aggregated_scATAC_peak_10752	chr11	35120834	35121984	overlapStart	185	0	ENSMUSG00000056427	Slit3	protein_coding	1.97832e-05
aggregated_scATAC_peak_10760	chr11	35271482	35271715	NA	NA	0,1	NA	NA	NA	2.48228e-05
aggregated_scATAC_peak_10789	chr11	35507778	35508422	NA	NA	0,1	NA	NA	NA	1.19901e-05
aggregated_scATAC_peak_10832	chr11	36064231	36064480	upstream	16308	1	ENSMUSG00000087245	Gm12126	antisense_RNA	2.84233e-05
aggregated_scATAC_peak_10842	chr11	36279602	36280008	overlapEnd	1764	0	ENSMUSG00000086375	Gm12127	antisense_RNA	9.74169e-07
aggregated_scATAC_peak_10862	chr11	37248973	37249422	upstream	13234	1	ENSMUSG00000049336	Tenm2	protein_coding	1.0007e-06
aggregated_scATAC_peak_11012	chr11	46205607	46206330	upstream	29563	1	ENSMUSG00000048721	Fndc9	protein_coding	1.80114e-06
aggregated_scATAC_peak_11014	chr11	46213893	46214192	upstream	21489	1	ENSMUSG00000048721	Fndc9	protein_coding	4.22664e-05
aggregated_scATAC_peak_11149	chr11	50601581	50602816	overlapStart	114	0	ENSMUSG00000036545	Adamts2	protein_coding	5.38031e-06
aggregated_scATAC_peak_11150	chr11	50602988	50603524	upstream	808	0	ENSMUSG00000085564	Gm12198	processed_transcript	9.36267e-05
aggregated_scATAC_peak_11151	chr11	50622092	50622831	upstream	20014	1	ENSMUSG00000085564	Gm12198	processed_transcript	2.45943e-07
aggregated_scATAC_peak_11153	chr11	50653819	50654431	NA	NA	0,1	NA	NA	NA	5.64659e-09
aggregated_scATAC_peak_11154	chr11	50656123	50656667	NA	NA	0,1	NA	NA	NA	4.50057e-08
aggregated_scATAC_peak_11156	chr11	50732565	50733517	upstream	7497	1	ENSMUSG00000085902	Gm12200	antisense_RNA	4.02725e-08
aggregated_scATAC_peak_11180	chr11	51388854	51389429	NA	NA	0,1	NA	NA	NA	3.19897e-09
aggregated_scATAC_peak_11186	chr11	51469234	51469739	NA	NA	0,1	NA	NA	NA	1.6303e-06
aggregated_scATAC_peak_11268	chr11	52561357	52561609	NA	NA	0,1	NA	NA	NA	1.8936e-05
aggregated_scATAC_peak_11367	chr11	54067388	54067640	PeakInsideFeature	1500	0	ENSMUSG00000020388	Pdlim4	protein_coding	2.05013e-05
aggregated_scATAC_peak_11414	chr11	54904256	54904728	PeakInsideFeature	2039	1	ENSMUSG00000018339	Gpx3	protein_coding	2.88358e-05
aggregated_scATAC_peak_11423	chr11	54977360	54977942	upstream	14734	1	ENSMUSG00000020400	Tnip1	protein_coding	8.13865e-05
aggregated_scATAC_peak_11481	chr11	55974490	55974824	NA	NA	0,1	NA	NA	NA	1.85785e-06
aggregated_scATAC_peak_11515	chr11	57670800	57672148	upstream	13648	1	ENSMUSG00000086933	4933426K07Rik	antisense_RNA	4.24304e-09
aggregated_scATAC_peak_11540	chr11	57831499	57832307	PeakInsideFeature	915	0	ENSMUSG00000037335	Hand1	protein_coding	6.30141e-07
aggregated_scATAC_peak_11545	chr11	57866244	57867106	upstream	14221	1	ENSMUSG00000084223	Gm12244	processed_pseudogene	1.40472e-08
aggregated_scATAC_peak_11550	chr11	57903943	57904723	downstream	23437	1	ENSMUSG00000084223	Gm12244	processed_pseudogene	9.71813e-06
aggregated_scATAC_peak_11553	chr11	57915881	57916517	downstream	32886	1	ENSMUSG00000083657	Gm12245	processed_pseudogene	8.86622e-05
aggregated_scATAC_peak_11554	chr11	57929441	57929980	downstream	19375	1	ENSMUSG00000083657	Gm12245	processed_pseudogene	3.41513e-08
aggregated_scATAC_peak_11759	chr11	60895761	60896412	upstream	16814	1	ENSMUSG00000043284	Tmem11	protein_coding	1.88668e-07
aggregated_scATAC_peak_11773	chr11	61071400	61071871	downstream	49072	1	ENSMUSG00000042529	Kcnj12	protein_coding	7.776e-06
aggregated_scATAC_peak_11803	chr11	61484569	61485682	overlapStart	305	0	ENSMUSG00000042436	Mfap4	protein_coding	1.04266e-06
aggregated_scATAC_peak_11810	chr11	61615965	61616581	upstream	36586	1	ENSMUSG00000001036	Epn2	protein_coding	9.90317e-05
aggregated_scATAC_peak_11838	chr11	62442169	62442972	upstream	15890	1	ENSMUSG00000014245	Pigl	protein_coding	9.77214e-08
aggregated_scATAC_peak_11881	chr11	63023743	63024628	upstream	20052	1	ENSMUSG00000087604	Cdrt4os1	antisense_RNA	7.61866e-09
aggregated_scATAC_peak_11906	chr11	63486791	63487555	NA	NA	0,1	NA	NA	NA	9.0692e-08
aggregated_scATAC_peak_11908	chr11	63545566	63546188	NA	NA	0,1	NA	NA	NA	4.73311e-05
aggregated_scATAC_peak_11909	chr11	63550425	63550816	NA	NA	0,1	NA	NA	NA	3.07784e-05
aggregated_scATAC_peak_11911	chr11	63569908	63570595	downstream	30671	1	ENSMUSG00000082256	Gm12287	processed_pseudogene	4.16986e-05
aggregated_scATAC_peak_11920	chr11	63791038	63791625	downstream	26968	1	ENSMUSG00000083142	Gm12288	processed_pseudogene	5.95688e-05
aggregated_scATAC_peak_11934	chr11	63965837	63966203	PeakInsideFeature	1794	0	ENSMUSG00000086359	9630013K17Rik	antisense_RNA	7.39218e-05
aggregated_scATAC_peak_11949	chr11	64178217	64178476	PeakInsideFeature	13773	1	ENSMUSG00000087622	Gm12290	lincRNA	5.22747e-05
aggregated_scATAC_peak_11958	chr11	64333740	64334157	NA	NA	0,1	NA	NA	NA	5.16722e-05
aggregated_scATAC_peak_11975	chr11	64671894	64672223	NA	NA	0,1	NA	NA	NA	5.80674e-06
aggregated_scATAC_peak_11983	chr11	64859447	64860105	upstream	16023	1	ENSMUSG00000086490	Gm12292	lincRNA	5.3063e-05
aggregated_scATAC_peak_12006	chr11	65303662	65304262	upstream	33973	1	ENSMUSG00000020542	Myocd	protein_coding	7.29834e-05
aggregated_scATAC_peak_12149	chr11	68593331	68593781	PeakInsideFeature	6535	1	ENSMUSG00000045915	Ccdc42	protein_coding	4.18049e-07
aggregated_scATAC_peak_12156	chr11	68654179	68654643	upstream	37148	1	ENSMUSG00000020900	Myh10	protein_coding	6.14411e-08
aggregated_scATAC_peak_12449	chr11	72072146	72073030	downstream	30556	1	ENSMUSG00000020808	Pimreg	protein_coding	5.36977e-05
aggregated_scATAC_peak_12538	chr11	74404254	74404573	downstream	42345	1	ENSMUSG00000058275	Olfr412	protein_coding	8.27996e-05
aggregated_scATAC_peak_12695	chr11	76374559	76375293	PeakInsideFeature	24214	1	ENSMUSG00000020844	Nxn	protein_coding	2.58553e-05
aggregated_scATAC_peak_12987	chr11	79806001	79806510	NA	NA	0,1	NA	NA	NA	3.904e-09
aggregated_scATAC_peak_12989	chr11	79836936	79838031	PeakInsideFeature	34910	1	ENSMUSG00000086474	9130204K15Rik	lincRNA	4.89842e-08
aggregated_scATAC_peak_12992	chr11	79860399	79861151	PeakInsideFeature	11619	1	ENSMUSG00000086474	9130204K15Rik	lincRNA	9.15241e-05
aggregated_scATAC_peak_12998	chr11	79928219	79928835	downstream	22546	1	ENSMUSG00000082252	Gm11204	processed_pseudogene	4.48663e-07
aggregated_scATAC_peak_13073	chr11	81372300	81372816	upstream	12455	1	ENSMUSG00000086971	4930527B05Rik	antisense_RNA	1.58175e-05
aggregated_scATAC_peak_13075	chr11	81449169	81449777	NA	NA	0,1	NA	NA	NA	7.20314e-08
aggregated_scATAC_peak_13082	chr11	81602819	81603076	downstream	15587	1	ENSMUSG00000087534	Gm11418	antisense_RNA	9.174e-05
aggregated_scATAC_peak_13125	chr11	82569469	82570234	downstream	26327	1	ENSMUSG00000065201	Gm24612	snRNA	1.65678e-06
aggregated_scATAC_peak_13207	chr11	83874822	83875219	PeakInsideFeature	24957	1	ENSMUSG00000020679	Hnf1b	protein_coding	8.74276e-06
aggregated_scATAC_peak_13354	chr11	85799501	85800411	downstream	21144	1	ENSMUSG00000089508	Gm23473	rRNA	4.31326e-07
aggregated_scATAC_peak_13357	chr11	85818254	85818709	PeakInsideFeature	13741	1	ENSMUSG00000087013	2610027K06Rik	processed_transcript	3.338e-06
aggregated_scATAC_peak_13373	chr11	85909685	85910722	PeakInsideFeature	23782	1	ENSMUSG00000000094	Tbx4	protein_coding	7.20082e-06
aggregated_scATAC_peak_13397	chr11	86409194	86409404	downstream	473	0	ENSMUSG00000088091	Gm23667	rRNA	4.93619e-06
aggregated_scATAC_peak_13586	chr11	88560911	88561768	NA	NA	0,1	NA	NA	NA	1.65599e-05
aggregated_scATAC_peak_13592	chr11	88593899	88594442	NA	NA	0,1	NA	NA	NA	2.87301e-05
aggregated_scATAC_peak_13657	chr11	89301600	89303139	overlapStart	38	0	ENSMUSG00000048616	Nog	protein_coding	6.84585e-05
aggregated_scATAC_peak_13664	chr11	89360671	89361035	NA	NA	0,1	NA	NA	NA	2.13935e-07
aggregated_scATAC_peak_13836	chr11	94881955	94883037	upstream	20737	1	ENSMUSG00000043522	A430060F13Rik	unprocessed_pseudogene	4.2672e-10
aggregated_scATAC_peak_14027	chr11	96382007	96382967	upstream	9625	1	ENSMUSG00000075587	Gm11531	processed_pseudogene	2.31153e-08
aggregated_scATAC_peak_14030	chr11	96396868	96398278	downstream	5461	1	ENSMUSG00000075587	Gm11531	processed_pseudogene	5.52938e-11
aggregated_scATAC_peak_14035	chr11	96421082	96422330	downstream	29594	1	ENSMUSG00000075587	Gm11531	processed_pseudogene	7.96753e-06
aggregated_scATAC_peak_14051	chr11	96604776	96605055	NA	NA	0,1	NA	NA	NA	8.44535e-05
aggregated_scATAC_peak_14091	chr11	96899241	96900010	upstream	16644	1	ENSMUSG00000078700	D030028A08Rik	processed_transcript	2.04572e-05
aggregated_scATAC_peak_14130	chr11	97145006	97145257	downstream	1287	0	ENSMUSG00000099286	Mir7235	miRNA	6.94208e-05
aggregated_scATAC_peak_14386	chr11	99311487	99312036	upstream	5622	1	ENSMUSG00000083666	Gm12358	processed_pseudogene	6.83629e-05
aggregated_scATAC_peak_14595	chr11	101727064	101727283	upstream	5745	1	ENSMUSG00000034931	Dhx8	protein_coding	1.79569e-06
aggregated_scATAC_peak_14596	chr11	101729444	101729689	upstream	3353	0	ENSMUSG00000034931	Dhx8	protein_coding	1.47686e-05
aggregated_scATAC_peak_14655	chr11	102165804	102166656	upstream	9826	1	ENSMUSG00000020921	Tmem101	protein_coding	9.96119e-05
aggregated_scATAC_peak_14710	chr11	102623776	102624972	overlapStart	42	0	ENSMUSG00000086283	2810433D01Rik	lincRNA	1.2462e-05
aggregated_scATAC_peak_14880	chr11	104576811	104577480	upstream	5589	1	ENSMUSG00000082706	Gm11663	processed_pseudogene	1.64828e-05
aggregated_scATAC_peak_14901	chr11	105291812	105293442	overlapStart	16	0	ENSMUSG00000020695	Mrc2	protein_coding	6.02516e-05
aggregated_scATAC_peak_14902	chr11	105312732	105313721	PeakInsideFeature	20583	1	ENSMUSG00000020695	Mrc2	protein_coding	1.31606e-05
aggregated_scATAC_peak_15119	chr11	109068477	109069367	upstream	1832	0	ENSMUSG00000064691	Gm24149	snRNA	4.38327e-07
aggregated_scATAC_peak_15346	chr11	113989947	113990950	NA	NA	0,1	NA	NA	NA	1.3477e-05
aggregated_scATAC_peak_15350	chr11	114040241	114041168	PeakInsideFeature	26342	1	ENSMUSG00000041592	Sdk2	protein_coding	3.61643e-07
aggregated_scATAC_peak_15404	chr11	114684524	114685332	PeakInsideFeature	9497	1	ENSMUSG00000034714	Ttyh2	protein_coding	1.91325e-05
aggregated_scATAC_peak_15419	chr11	114814930	114815395	downstream	16238	1	ENSMUSG00000034677	Gpr142	protein_coding	2.45925e-06
aggregated_scATAC_peak_15500	chr11	115467021	115467794	upstream	3954	0	ENSMUSG00000085651	Gm11695	antisense_RNA	2.28683e-06
aggregated_scATAC_peak_15579	chr11	116244214	116244508	upstream	6284	1	ENSMUSG00000034282	Evpl	protein_coding	5.26198e-05
aggregated_scATAC_peak_15699	chr11	117278010	117278853	upstream	14995	1	ENSMUSG00000086050	Gm16045	antisense_RNA	1.83667e-05
aggregated_scATAC_peak_15798	chr11	118133271	118134193	upstream	3098	0	ENSMUSG00000033987	Dnah17	protein_coding	8.60766e-06
aggregated_scATAC_peak_15799	chr11	118162241	118162658	downstream	18585	1	ENSMUSG00000088119	Gm24060	snRNA	8.36138e-05
aggregated_scATAC_peak_15881	chr11	118908780	118910234	PeakInsideFeature	2090	0	ENSMUSG00000025576	Rbfox3	protein_coding	2.79506e-05
aggregated_scATAC_peak_15943	chr11	119387210	119387906	upstream	2914	0	ENSMUSG00000088015	Mir1932	miRNA	1.93131e-05
aggregated_scATAC_peak_16089	chr11	120695134	120696032	PeakInsideFeature	13864	1	ENSMUSG00000090758	Gm17178	antisense_RNA	1.66573e-08
aggregated_scATAC_peak_16091	chr11	120704850	120705355	PeakInsideFeature	4345	0	ENSMUSG00000090758	Gm17178	antisense_RNA	2.24438e-05
aggregated_scATAC_peak_16092	chr11	120706976	120707762	PeakInsideFeature	2078	0	ENSMUSG00000090758	Gm17178	antisense_RNA	7.83904e-05
aggregated_scATAC_peak_16291	chr12	6254921	6255221	downstream	27265	1	ENSMUSG00000112591	Gm4927	processed_pseudogene	1.0166e-06
aggregated_scATAC_peak_16292	chr12	7250414	7251035	NA	NA	0,1	NA	NA	NA	5.8079e-05
aggregated_scATAC_peak_16348	chr12	8803398	8804049	downstream	32401	1	ENSMUSG00000020592	Sdc1	protein_coding	1.75778e-05
aggregated_scATAC_peak_16351	chr12	8856075	8856731	downstream	37070	1	ENSMUSG00000042976	9930038B18Rik	lincRNA	4.05749e-06
aggregated_scATAC_peak_16394	chr12	10128016	10128831	upstream	23718	1	ENSMUSG00000111942	Gm5182	processed_pseudogene	7.74084e-05
aggregated_scATAC_peak_16429	chr12	12274120	12274529	PeakInsideFeature	12185	1	ENSMUSG00000020589	Fam49a	protein_coding	6.75238e-07
aggregated_scATAC_peak_16447	chr12	12580754	12582252	NA	NA	0,1	NA	NA	NA	1.77244e-05
aggregated_scATAC_peak_16479	chr12	13048119	13049058	PeakInsideFeature	6141	1	ENSMUSG00000113928	AC161052.2	lincRNA	6.67318e-06
aggregated_scATAC_peak_16483	chr12	13091871	13092992	upstream	10413	1	ENSMUSG00000112988	Gm35298	lincRNA	6.37713e-07
aggregated_scATAC_peak_16486	chr12	13120296	13121247	upstream	5004	1	ENSMUSG00000113284	AC161052.1	lincRNA	7.2687e-08
aggregated_scATAC_peak_16492	chr12	13198144	13198661	upstream	34639	1	ENSMUSG00000064717	Gm24208	snoRNA	1.77425e-10
aggregated_scATAC_peak_16493	chr12	13199424	13200271	upstream	36085	1	ENSMUSG00000064717	Gm24208	snoRNA	1.46062e-07
aggregated_scATAC_peak_16503	chr12	13713065	13713442	downstream	40411	1	ENSMUSG00000097973	Gm4929	processed_pseudogene	2.48689e-06
aggregated_scATAC_peak_16541	chr12	16737107	16738572	downstream	29383	1	ENSMUSG00000105567	Gm44305	miRNA	2.20404e-08
aggregated_scATAC_peak_16543	chr12	16761924	16762237	downstream	5143	1	ENSMUSG00000105567	Gm44305	miRNA	4.73632e-05
aggregated_scATAC_peak_16544	chr12	16764901	16765495	downstream	2025	1	ENSMUSG00000105567	Gm44305	miRNA	1.22362e-05
aggregated_scATAC_peak_16763	chr12	25293514	25294249	upstream	10058	1	ENSMUSG00000113669	AC163354.1	lincRNA	3.7606e-05
aggregated_scATAC_peak_16769	chr12	25533808	25534921	NA	NA	0,1	NA	NA	NA	2.46444e-10
aggregated_scATAC_peak_16788	chr12	26534187	26534841	upstream	47723	1	ENSMUSG00000113059	Gm46344	processed_pseudogene	1.97475e-05
aggregated_scATAC_peak_16789	chr12	26723437	26723760	NA	NA	0,1	NA	NA	NA	4.51963e-07
aggregated_scATAC_peak_16817	chr12	27471397	27472082	NA	NA	0,1	NA	NA	NA	1.37405e-05
aggregated_scATAC_peak_16846	chr12	28622209	28622409	PeakInsideFeature	1068	0	ENSMUSG00000036655	Colec11	protein_coding	9.28559e-05
aggregated_scATAC_peak_16866	chr12	28997866	28998228	downstream	37247	1	ENSMUSG00000089583	Gm23342	rRNA	3.6614e-05
aggregated_scATAC_peak_16867	chr12	29000082	29000537	downstream	34984	1	ENSMUSG00000089583	Gm23342	rRNA	9.42864e-08
aggregated_scATAC_peak_16868	chr12	29009933	29010197	downstream	25229	1	ENSMUSG00000089583	Gm23342	rRNA	4.66991e-06
aggregated_scATAC_peak_16869	chr12	29015496	29015908	downstream	19592	1	ENSMUSG00000089583	Gm23342	rRNA	3.05783e-05
aggregated_scATAC_peak_16913	chr12	29981862	29982161	PeakInsideFeature	44404	1	ENSMUSG00000020674	Pxdn	protein_coding	7.0052e-06
aggregated_scATAC_peak_16919	chr12	30069212	30069775	downstream	9837	1	ENSMUSG00000085472	Gm15691	antisense_RNA	3.81064e-07
aggregated_scATAC_peak_17073	chr12	33806079	33806785	upstream	40022	1	ENSMUSG00000114064	Gm9370	processed_pseudogene	2.34354e-08
aggregated_scATAC_peak_17088	chr12	34346494	34347109	NA	NA	0,1	NA	NA	NA	3.21692e-07
aggregated_scATAC_peak_17095	chr12	35175918	35176539	downstream	18669	1	ENSMUSG00000076253	Mir680-3	miRNA	6.29821e-09
aggregated_scATAC_peak_17295	chr12	52868996	52869196	NA	NA	0,1	NA	NA	NA	1.41228e-05
aggregated_scATAC_peak_17296	chr12	52879369	52879678	NA	NA	0,1	NA	NA	NA	5.2328e-05
aggregated_scATAC_peak_17343	chr12	54479382	54479943	downstream	37417	1	ENSMUSG00000113947	Gm10465	lincRNA	6.11467e-09
aggregated_scATAC_peak_17345	chr12	54516095	54516401	PeakInsideFeature	831	0	ENSMUSG00000113947	Gm10465	lincRNA	2.21757e-05
aggregated_scATAC_peak_17515	chr12	63503772	63504088	NA	NA	0,1	NA	NA	NA	2.02016e-06
aggregated_scATAC_peak_17516	chr12	64389861	64390115	NA	NA	0,1	NA	NA	NA	4.98072e-05
aggregated_scATAC_peak_17521	chr12	64838812	64839012	downstream	22097	1	ENSMUSG00000114029	Gm4806	processed_pseudogene	6.66293e-05
aggregated_scATAC_peak_17523	chr12	64902541	64902902	upstream	15184	1	ENSMUSG00000047227	Gm527	protein_coding	5.31516e-06
aggregated_scATAC_peak_17662	chr12	71258224	71258914	downstream	11788	1	ENSMUSG00000113572	Gm7959	processed_pseudogene	2.33747e-06
aggregated_scATAC_peak_17679	chr12	71441396	71441651	upstream	46761	1	ENSMUSG00000113630	4930404H11Rik	lincRNA	2.78886e-05
aggregated_scATAC_peak_17685	chr12	71524072	71524550	PeakInsideFeature	36026	1	ENSMUSG00000113630	4930404H11Rik	lincRNA	4.76042e-07
aggregated_scATAC_peak_17693	chr12	71645816	71646460	NA	NA	0,1	NA	NA	NA	1.79587e-06
aggregated_scATAC_peak_17746	chr12	72719718	72720078	downstream	21684	1	ENSMUSG00000112989	AC164556.1	processed_pseudogene	7.16255e-05
aggregated_scATAC_peak_17803	chr12	73529135	73529657	downstream	16996	1	ENSMUSG00000034435	Tmem30b	protein_coding	1.26838e-05
aggregated_scATAC_peak_17827	chr12	73788862	73789178	upstream	4463	0	ENSMUSG00000113321	Gm8075	lincRNA	3.8784e-06
aggregated_scATAC_peak_17973	chr12	77597687	77598708	downstream	21104	1	ENSMUSG00000111896	AC159297.1	processed_pseudogene	4.71751e-07
aggregated_scATAC_peak_17976	chr12	77677952	77678724	upstream	4723	0	ENSMUSG00000111903	4930458K08Rik	lincRNA	1.85845e-08
aggregated_scATAC_peak_17986	chr12	78077395	78077770	NA	NA	0,1	NA	NA	NA	1.17455e-05
aggregated_scATAC_peak_18070	chr12	79859312	79860300	NA	NA	0,1	NA	NA	NA	1.45169e-05
aggregated_scATAC_peak_18078	chr12	79931520	79931806	PeakInsideFeature	4601	0	ENSMUSG00000112765	9430078K24Rik	lincRNA	3.58048e-06
aggregated_scATAC_peak_18094	chr12	80022210	80023467	upstream	42987	1	ENSMUSG00000112292	Gm8275	processed_pseudogene	5.27803e-07
aggregated_scATAC_peak_18124	chr12	80229926	80230917	downstream	21179	1	ENSMUSG00000112852	CT030161.3	antisense_RNA	1.07191e-05
aggregated_scATAC_peak_18246	chr12	82486984	82487528	downstream	9281	1	ENSMUSG00000094374	Gm5435	processed_pseudogene	1.3326e-05
aggregated_scATAC_peak_18290	chr12	83425434	83425969	NA	NA	0,1	NA	NA	NA	1.32355e-05
aggregated_scATAC_peak_18291	chr12	83426478	83426751	NA	NA	0,1	NA	NA	NA	2.74701e-05
aggregated_scATAC_peak_18292	chr12	83427832	83428306	NA	NA	0,1	NA	NA	NA	1.99545e-05
aggregated_scATAC_peak_18296	chr12	83478793	83479122	PeakInsideFeature	8758	1	ENSMUSG00000021221	Dpf3	protein_coding	9.41481e-05
aggregated_scATAC_peak_18389	chr12	84890289	84890566	downstream	8604	1	ENSMUSG00000113079	CR974585.1	lincRNA	1.94198e-05
aggregated_scATAC_peak_18408	chr12	85175163	85175419	PeakInsideFeature	2499	0	ENSMUSG00000004791	Pgf	protein_coding	1.28934e-06
aggregated_scATAC_peak_18456	chr12	85604694	85604973	upstream	5643	1	ENSMUSG00000113165	AC115037.1	bidirectional_promoter_lncRNA	4.96103e-06
aggregated_scATAC_peak_18491	chr12	86037208	86038106	upstream	31516	1	ENSMUSG00000103301	Gm37804	TEC	4.8954e-05
aggregated_scATAC_peak_18552	chr12	86816144	86816583	downstream	6407	1	ENSMUSG00000088403	Gm25888	misc_RNA	8.43363e-05
aggregated_scATAC_peak_18665	chr12	94672190	94672452	NA	NA	0,1	NA	NA	NA	4.39665e-07
aggregated_scATAC_peak_18678	chr12	97888010	97889411	upstream	16190	1	ENSMUSG00000111885	Gm35326	lincRNA	2.83559e-05
aggregated_scATAC_peak_18758	chr12	100127915	100128706	downstream	18156	1	ENSMUSG00000021178	Psmc1	protein_coding	1.54957e-05
aggregated_scATAC_peak_18805	chr12	100997709	100998439	PeakInsideFeature	11451	1	ENSMUSG00000113634	Gm36756	antisense_RNA	6.30181e-06
aggregated_scATAC_peak_18905	chr12	103338248	103338448	PeakInsideFeature	1442	0	ENSMUSG00000090185	Gm15523	antisense_RNA	7.24348e-05
aggregated_scATAC_peak_18914	chr12	103453388	103453667	PeakInsideFeature	3695	0	ENSMUSG00000021208	Ifi27l2b	protein_coding	1.82926e-06
aggregated_scATAC_peak_18990	chr12	104908149	104909155	downstream	18037	1	ENSMUSG00000100975	Gm28875	lincRNA	2.5212e-05
aggregated_scATAC_peak_19024	chr12	105318051	105318734	upstream	15478	1	ENSMUSG00000097929	Tunar	protein_coding	4.19832e-07
aggregated_scATAC_peak_19081	chr12	106059950	106060521	upstream	24134	1	ENSMUSG00000113427	AC163040.1	lincRNA	7.51522e-07
aggregated_scATAC_peak_19097	chr12	106429861	106430377	downstream	17547	1	ENSMUSG00000092066	1700121N20Rik	lincRNA	6.38026e-05
aggregated_scATAC_peak_19252	chr12	109398959	109399708	NA	NA	0,1	NA	NA	NA	2.02069e-08
aggregated_scATAC_peak_19253	chr12	109403747	109404301	upstream	48799	1	ENSMUSG00000040856	Dlk1	protein_coding	3.29964e-05
aggregated_scATAC_peak_19255	chr12	109417369	109418089	upstream	35094	1	ENSMUSG00000040856	Dlk1	protein_coding	7.22171e-05
aggregated_scATAC_peak_19272	chr12	109518412	109519336	upstream	2134	0	ENSMUSG00000112977	Gm34081	lincRNA	2.31296e-07
aggregated_scATAC_peak_19291	chr12	109836438	109836954	downstream	9693	1	ENSMUSG00000113711	Gm9661	processed_pseudogene	1.75358e-07
aggregated_scATAC_peak_19293	chr12	109883487	109884125	downstream	11287	1	ENSMUSG00000113625	Gm3379	processed_pseudogene	1.57696e-07
aggregated_scATAC_peak_19302	chr12	110082796	110083535	upstream	654	0	ENSMUSG00000113042	AC091458.1	TEC	6.05191e-05
aggregated_scATAC_peak_19305	chr12	110115738	110116116	upstream	29504	1	ENSMUSG00000113868	Gm34719	lincRNA	6.44955e-06
aggregated_scATAC_peak_19487	chr12	112221384	112222577	upstream	16827	1	ENSMUSG00000113282	Gm20368	processed_pseudogene	1.94606e-05
aggregated_scATAC_peak_19706	chr12	118903272	118903508	NA	NA	0,1	NA	NA	NA	2.66432e-05
aggregated_scATAC_peak_19707	chr12	118903667	118904336	NA	NA	0,1	NA	NA	NA	3.66832e-08
aggregated_scATAC_peak_19765	chr13	5638510	5638722	NA	NA	0,1	NA	NA	NA	9.71391e-06
aggregated_scATAC_peak_19783	chr13	6030198	6030477	upstream	1334	0	ENSMUSG00000113054	AC154816.1	lincRNA	4.32107e-05
aggregated_scATAC_peak_19785	chr13	6130486	6130795	NA	NA	0,1	NA	NA	NA	1.23126e-05
aggregated_scATAC_peak_19808	chr13	8405991	8406484	NA	NA	0,1	NA	NA	NA	7.20555e-08
aggregated_scATAC_peak_19862	chr13	12057274	12057926	upstream	5545	1	ENSMUSG00000112947	CT572985.1	TEC	3.55146e-05
aggregated_scATAC_peak_19866	chr13	12133467	12133999	upstream	26788	1	ENSMUSG00000021313	Ryr2	protein_coding	2.34636e-07
aggregated_scATAC_peak_19899	chr13	13479958	13480274	PeakInsideFeature	2289	0	ENSMUSG00000113380	AC122465.1	antisense_RNA	1.93169e-05
aggregated_scATAC_peak_19908	chr13	13857267	13857535	upstream	5133	1	ENSMUSG00000113811	CT009546.2	lincRNA	1.13195e-05
aggregated_scATAC_peak_20001	chr13	19476061	19476294	PeakInsideFeature	28189	1	ENSMUSG00000114189	9330199G10Rik	lincRNA	3.43909e-06
aggregated_scATAC_peak_20359	chr13	28664353	28664695	downstream	46349	1	ENSMUSG00000099158	Mir6368	miRNA	3.00291e-05
aggregated_scATAC_peak_20476	chr13	31267890	31268180	upstream	26949	1	ENSMUSG00000087460	4930401O12Rik	lincRNA	3.38836e-05
aggregated_scATAC_peak_20493	chr13	31437329	31438024	downstream	10421	1	ENSMUSG00000089052	Gm23351	snoRNA	1.81097e-07
aggregated_scATAC_peak_20506	chr13	31624006	31624348	PeakInsideFeature	1615	0	ENSMUSG00000038408	1700018A04Rik	lincRNA	9.82609e-05
aggregated_scATAC_peak_20737	chr13	38073719	38074905	upstream	11890	1	ENSMUSG00000098481	Gm27387	miRNA	1.41577e-08
aggregated_scATAC_peak_20754	chr13	38324509	38324718	PeakInsideFeature	4088	1	ENSMUSG00000114525	AC124549.1	lincRNA	1.82903e-05
aggregated_scATAC_peak_20778	chr13	39538124	39538377	upstream	5147	1	ENSMUSG00000114221	AC129202.1	lincRNA	6.30661e-05
aggregated_scATAC_peak_20784	chr13	40360564	40361252	PeakInsideFeature	542	0	ENSMUSG00000047094	Ofcc1	protein_coding	9.46084e-05
aggregated_scATAC_peak_20913	chr13	43195952	43196418	upstream	24684	1	ENSMUSG00000021368	Tbc1d7	protein_coding	2.10812e-05
aggregated_scATAC_peak_21102	chr13	46418008	46419559	overlapStart	350	0	ENSMUSG00000038132	Rbm24	protein_coding	8.93243e-05
aggregated_scATAC_peak_21109	chr13	46522660	46523611	downstream	4452	1	ENSMUSG00000087913	Gm24915	rRNA	6.00189e-05
aggregated_scATAC_peak_21177	chr13	48292025	48292302	upstream	18280	1	ENSMUSG00000097326	A330048O09Rik	lincRNA	7.95651e-05
aggregated_scATAC_peak_21288	chr13	51258803	51259049	NA	NA	0,1	NA	NA	NA	4.88087e-06
aggregated_scATAC_peak_21289	chr13	51259134	51259640	NA	NA	0,1	NA	NA	NA	8.57099e-09
aggregated_scATAC_peak_21290	chr13	51279695	51280653	NA	NA	0,1	NA	NA	NA	5.82542e-08
aggregated_scATAC_peak_21291	chr13	51314457	51315058	upstream	24163	1	ENSMUSG00000113426	Gm6056	processed_pseudogene	2.53998e-06
aggregated_scATAC_peak_21341	chr13	51953180	51954059	upstream	19594	1	ENSMUSG00000097495	Gm26651	lincRNA	2.4464e-05
aggregated_scATAC_peak_21354	chr13	52106193	52106498	PeakInsideFeature	9605	1	ENSMUSG00000113211	4921525O09Rik	processed_transcript	6.00804e-05
aggregated_scATAC_peak_21412	chr13	53183129	53183709	NA	NA	0,1	NA	NA	NA	1.70777e-09
aggregated_scATAC_peak_21413	chr13	53193759	53194259	NA	NA	0,1	NA	NA	NA	7.1638e-05
aggregated_scATAC_peak_21415	chr13	53203858	53204386	NA	NA	0,1	NA	NA	NA	1.49893e-05
aggregated_scATAC_peak_21416	chr13	53205131	53205648	NA	NA	0,1	NA	NA	NA	2.37811e-06
aggregated_scATAC_peak_21455	chr13	53562967	53563757	upstream	30105	1	ENSMUSG00000113834	AC154808.1	lincRNA	1.36292e-07
aggregated_scATAC_peak_21456	chr13	53576198	53576797	upstream	43241	1	ENSMUSG00000113834	AC154808.1	lincRNA	1.1378e-06
aggregated_scATAC_peak_21477	chr13	53993068	53993579	downstream	24380	1	ENSMUSG00000113882	AC165273.1	lincRNA	7.18751e-05
aggregated_scATAC_peak_21503	chr13	54332304	54332733	upstream	4638	0	ENSMUSG00000113404	AC164441.2	lincRNA	5.85101e-07
aggregated_scATAC_peak_21556	chr13	54929565	54929888	PeakInsideFeature	530	0	ENSMUSG00000087335	4930526F13Rik	lincRNA	4.44796e-05
aggregated_scATAC_peak_21631	chr13	55846824	55847533	upstream	10986	1	ENSMUSG00000021506	Pitx1	protein_coding	7.80373e-07
aggregated_scATAC_peak_21632	chr13	55847777	55848470	upstream	11932	1	ENSMUSG00000021506	Pitx1	protein_coding	1.08687e-06
aggregated_scATAC_peak_21644	chr13	55965814	55966778	upstream	35969	1	ENSMUSG00000114493	AC164426.2	antisense_RNA	2.69787e-06
aggregated_scATAC_peak_21649	chr13	56023183	56023830	downstream	6728	1	ENSMUSG00000114229	AC164426.1	processed_pseudogene	4.00898e-06
aggregated_scATAC_peak_21650	chr13	56032326	56033380	upstream	2619	0	ENSMUSG00000114229	AC164426.1	processed_pseudogene	7.35416e-07
aggregated_scATAC_peak_21664	chr13	56155138	56155366	upstream	12348	1	ENSMUSG00000077799	Gm25148	snoRNA	1.01891e-06
aggregated_scATAC_peak_21665	chr13	56159277	56160631	upstream	7646	1	ENSMUSG00000077799	Gm25148	snoRNA	6.12335e-09
aggregated_scATAC_peak_21691	chr13	56418627	56419524	upstream	7518	1	ENSMUSG00000110477	Gm3045	protein_coding	1.19124e-06
aggregated_scATAC_peak_21704	chr13	56581600	56583039	upstream	13217	1	ENSMUSG00000114604	AC132901.1	lincRNA	5.4572e-07
aggregated_scATAC_peak_21705	chr13	56600285	56600552	downstream	4881	1	ENSMUSG00000114604	AC132901.1	lincRNA	7.9745e-08
aggregated_scATAC_peak_21706	chr13	56601108	56601568	downstream	5801	1	ENSMUSG00000114604	AC132901.1	lincRNA	2.15003e-07
aggregated_scATAC_peak_21743	chr13	57529480	57529801	NA	NA	0,1	NA	NA	NA	3.11169e-05
aggregated_scATAC_peak_21823	chr13	58780813	58781139	PeakInsideFeature	16472	1	ENSMUSG00000114231	AC159195.2	lincRNA	1.28119e-05
aggregated_scATAC_peak_21838	chr13	58986031	58986455	NA	NA	0,1	NA	NA	NA	8.11411e-05
aggregated_scATAC_peak_21850	chr13	59292762	59293370	downstream	37177	1	ENSMUSG00000114240	AC165260.2	lincRNA	1.12811e-05
aggregated_scATAC_peak_21906	chr13	60225881	60226919	downstream	20929	1	ENSMUSG00000050765	Gm5084	lincRNA	1.81343e-05
aggregated_scATAC_peak_21912	chr13	60308057	60308825	downstream	14769	1	ENSMUSG00000080668	Gm24999	miRNA	3.62369e-06
aggregated_scATAC_peak_21926	chr13	60507758	60508104	upstream	19123	1	ENSMUSG00000114452	AC123619.1	lincRNA	4.89023e-06
aggregated_scATAC_peak_22014	chr13	63609516	63610175	downstream	17533	1	ENSMUSG00000113453	Gm30709	lincRNA	8.97361e-06
aggregated_scATAC_peak_22015	chr13	63611979	63612388	downstream	15195	1	ENSMUSG00000113453	Gm30709	lincRNA	3.15051e-05
aggregated_scATAC_peak_22034	chr13	63911722	63912347	downstream	34487	1	ENSMUSG00000113340	Gm7695	processed_pseudogene	1.44074e-06
aggregated_scATAC_peak_22039	chr13	63951068	63951553	upstream	4789	0	ENSMUSG00000113340	Gm7695	processed_pseudogene	2.75545e-08
aggregated_scATAC_peak_22040	chr13	63951674	63952523	upstream	5577	1	ENSMUSG00000113340	Gm7695	processed_pseudogene	9.82703e-09
aggregated_scATAC_peak_22045	chr13	64020775	64021396	NA	NA	0,1	NA	NA	NA	9.32455e-07
aggregated_scATAC_peak_22062	chr13	64233971	64234290	upstream	14570	1	ENSMUSG00000097101	1810034E14Rik	antisense_RNA	3.5534e-05
aggregated_scATAC_peak_22144	chr13	69427425	69427776	upstream	26203	1	ENSMUSG00000106556	Gm44375	miRNA	8.79356e-06
aggregated_scATAC_peak_22207	chr13	70740604	70741549	downstream	34843	1	ENSMUSG00000113794	Gm36607	antisense_RNA	7.73637e-07
aggregated_scATAC_peak_22262	chr13	72571948	72572207	NA	NA	0,1	NA	NA	NA	7.44301e-05
aggregated_scATAC_peak_22345	chr13	73887536	73887797	downstream	37044	1	ENSMUSG00000095943	Gm25197	miRNA	4.86264e-07
aggregated_scATAC_peak_22411	chr13	76591838	76592201	downstream	12430	1	ENSMUSG00000096675	Gm24519	snoRNA	3.30278e-06
aggregated_scATAC_peak_22435	chr13	78623723	78624028	upstream	14141	1	ENSMUSG00000114594	CT571256.1	lincRNA	3.05451e-06
aggregated_scATAC_peak_22438	chr13	78871185	78872270	NA	NA	0,1	NA	NA	NA	2.1127e-05
aggregated_scATAC_peak_22475	chr13	82066095	82066390	downstream	15491	1	ENSMUSG00000088923	Gm24295	snoRNA	1.45898e-05
aggregated_scATAC_peak_22517	chr13	89547158	89547981	PeakInsideFeature	7774	1	ENSMUSG00000021613	Hapln1	protein_coding	7.0893e-05
aggregated_scATAC_peak_22600	chr13	92696618	92696870	upstream	22618	1	ENSMUSG00000114631	CT009509.1	processed_pseudogene	8.37182e-06
aggregated_scATAC_peak_22605	chr13	92757782	92758290	PeakInsideFeature	36782	1	ENSMUSG00000021702	Thbs4	protein_coding	8.04333e-05
aggregated_scATAC_peak_22631	chr13	93750177	93750377	upstream	21353	1	ENSMUSG00000042082	Arsb	protein_coding	5.67183e-05
aggregated_scATAC_peak_22657	chr13	94142955	94143651	upstream	3186	0	ENSMUSG00000087319	Gm15907	lincRNA	5.07388e-05
aggregated_scATAC_peak_22744	chr13	95655311	95655653	upstream	29663	1	ENSMUSG00000113631	AC171003.1	TEC	3.43894e-05
aggregated_scATAC_peak_22914	chr13	98633745	98634029	downstream	3523	1	ENSMUSG00000046082	Tmem174	protein_coding	6.87756e-06
aggregated_scATAC_peak_22964	chr13	99555115	99555410	upstream	6180	1	ENSMUSG00000114578	AC139381.1	processed_pseudogene	8.12256e-05
aggregated_scATAC_peak_23051	chr13	102625160	102625571	downstream	20833	1	ENSMUSG00000114730	AC122382.1	processed_pseudogene	7.0241e-08
aggregated_scATAC_peak_23073	chr13	103027451	103028154	NA	NA	0,1	NA	NA	NA	1.39029e-06
aggregated_scATAC_peak_23118	chr13	104517974	104518690	NA	NA	0,1	NA	NA	NA	4.15629e-05
aggregated_scATAC_peak_23124	chr13	104572687	104572904	NA	NA	0,1	NA	NA	NA	3.33637e-05
aggregated_scATAC_peak_23212	chr13	108271793	108272531	downstream	38588	1	ENSMUSG00000114607	AC161252.3	processed_pseudogene	6.28341e-06
aggregated_scATAC_peak_23303	chr13	111509157	111509704	upstream	19319	1	ENSMUSG00000032745	Gpbp1	protein_coding	9.08834e-05
aggregated_scATAC_peak_23434	chr13	114159366	114159947	upstream	8064	1	ENSMUSG00000114213	AC126549.1	antisense_RNA	4.44913e-05
aggregated_scATAC_peak_23474	chr13	116143005	116143582	upstream	10487	1	ENSMUSG00000061669	Rpl34-ps2	processed_pseudogene	1.17041e-06
aggregated_scATAC_peak_23518	chr13	118594008	118594674	downstream	4577	1	ENSMUSG00000114831	AC159188.3	processed_pseudogene	1.82285e-05
aggregated_scATAC_peak_23816	chr14	14852820	14853242	PeakInsideFeature	49616	1	ENSMUSG00000042567	Nek10	protein_coding	4.85223e-05
aggregated_scATAC_peak_23857	chr14	16964957	16965879	downstream	11812	1	ENSMUSG00000114202	AC129975.1	processed_pseudogene	7.93427e-07
aggregated_scATAC_peak_24006	chr14	21178445	21178692	NA	NA	0,1	NA	NA	NA	2.67222e-05
aggregated_scATAC_peak_24010	chr14	21444486	21444732	upstream	5865	1	ENSMUSG00000088873	Gm25864	snRNA	3.29157e-05
aggregated_scATAC_peak_24036	chr14	21903426	21904349	upstream	14122	1	ENSMUSG00000114352	AC132590.1	lincRNA	6.76106e-05
aggregated_scATAC_peak_24049	chr14	22081772	22082311	upstream	45939	1	ENSMUSG00000114205	AC129590.1	antisense_RNA	3.67392e-06
aggregated_scATAC_peak_24050	chr14	22090703	22091740	NA	NA	0,1	NA	NA	NA	5.84392e-09
aggregated_scATAC_peak_24052	chr14	22114730	22115351	NA	NA	0,1	NA	NA	NA	1.48061e-05
aggregated_scATAC_peak_24057	chr14	22168195	22169003	NA	NA	0,1	NA	NA	NA	9.52835e-05
aggregated_scATAC_peak_24072	chr14	22509869	22510746	PeakInsideFeature	32515	1	ENSMUSG00000114412	AC124729.1	antisense_RNA	2.94465e-08
aggregated_scATAC_peak_24174	chr14	24827401	24828098	upstream	5885	1	ENSMUSG00000114965	CT025626.1	lincRNA	3.1808e-07
aggregated_scATAC_peak_24175	chr14	24828726	24829535	upstream	4505	0	ENSMUSG00000114965	CT025626.1	lincRNA	1.09164e-10
aggregated_scATAC_peak_24183	chr14	24956881	24957081	downstream	47567	1	ENSMUSG00000072686	Gm10398	lincRNA	9.71391e-06
aggregated_scATAC_peak_24219	chr14	25421572	25421968	upstream	19871	1	ENSMUSG00000114232	AC157650.1	lincRNA	2.33735e-07
aggregated_scATAC_peak_24241	chr14	25561606	25562126	upstream	7497	1	ENSMUSG00000097136	Gm26772	lincRNA	4.23357e-06
aggregated_scATAC_peak_24263	chr14	25749217	25749861	PeakInsideFeature	19500	1	ENSMUSG00000055538	Zcchc24	protein_coding	9.83675e-06
aggregated_scATAC_peak_24265	chr14	25757965	25758312	PeakInsideFeature	10901	1	ENSMUSG00000055538	Zcchc24	protein_coding	8.94563e-06
aggregated_scATAC_peak_24325	chr14	27151366	27152117	PeakInsideFeature	36843	1	ENSMUSG00000021895	Arhgef3	protein_coding	8.05029e-05
aggregated_scATAC_peak_24363	chr14	28295062	28295763	NA	NA	0,1	NA	NA	NA	2.97576e-06
aggregated_scATAC_peak_24371	chr14	28375880	28376080	upstream	40017	1	ENSMUSG00000114503	CT025681.1	TEC	6.66293e-05
aggregated_scATAC_peak_24374	chr14	28417045	28417557	PeakInsideFeature	1304	0	ENSMUSG00000114503	CT025681.1	TEC	2.43535e-05
aggregated_scATAC_peak_24398	chr14	29042041	29042241	downstream	23933	1	ENSMUSG00000045776	Lrtm1	protein_coding	3.81253e-05
aggregated_scATAC_peak_24575	chr14	32439535	32440176	downstream	24994	1	ENSMUSG00000100241	Slc18a3	protein_coding	3.48992e-06
aggregated_scATAC_peak_24601	chr14	32900135	32901087	downstream	2892	1	ENSMUSG00000098236	Gm7734	processed_pseudogene	5.32795e-07
aggregated_scATAC_peak_24640	chr14	33657478	33657908	downstream	13198	1	ENSMUSG00000064446	Gm26228	snRNA	1.01919e-05
aggregated_scATAC_peak_24871	chr14	46436146	46437305	overlapStart	129	0	ENSMUSG00000086168	Gm15221	lincRNA	2.29079e-07
aggregated_scATAC_peak_24873	chr14	46491171	46492257	PeakInsideFeature	10486	1	ENSMUSG00000115083	CT009556.1	lincRNA	1.35475e-08
aggregated_scATAC_peak_24877	chr14	46573419	46573826	downstream	17319	1	ENSMUSG00000085380	E130120K24Rik	lincRNA	4.18648e-06
aggregated_scATAC_peak_24879	chr14	46578523	46578846	PeakInsideFeature	19741	1	ENSMUSG00000085123	Rubie	lincRNA	9.45675e-05
aggregated_scATAC_peak_24888	chr14	46661552	46662711	upstream	9570	1	ENSMUSG00000115421	AC093022.2	processed_transcript	2.26583e-09
aggregated_scATAC_peak_24926	chr14	47129171	47129538	downstream	13058	1	ENSMUSG00000115207	AC159006.2	TEC	2.09332e-05
aggregated_scATAC_peak_25031	chr14	49782916	49783733	overlapStart	59	0	ENSMUSG00000036242	3632451O06Rik	protein_coding	2.58934e-05
aggregated_scATAC_peak_25253	chr14	55427447	55427716	upstream	6793	1	ENSMUSG00000060680	Gm8894	processed_pseudogene	7.63206e-06
aggregated_scATAC_peak_25254	chr14	55427845	55428369	upstream	7318	1	ENSMUSG00000060680	Gm8894	processed_pseudogene	1.30347e-07
aggregated_scATAC_peak_25361	chr14	57145441	57146217	upstream	12218	1	ENSMUSG00000040055	Gjb6	protein_coding	3.00528e-08
aggregated_scATAC_peak_25413	chr14	57968209	57968830	PeakInsideFeature	30742	1	ENSMUSG00000021973	Micu2	protein_coding	1.9614e-05
aggregated_scATAC_peak_25443	chr14	59068116	59068926	upstream	7458	1	ENSMUSG00000114441	AC129308.2	lincRNA	8.08297e-07
aggregated_scATAC_peak_25469	chr14	59739413	59739836	NA	NA	0,1	NA	NA	NA	2.42871e-05
aggregated_scATAC_peak_25526	chr14	60727068	60728070	upstream	40565	1	ENSMUSG00000071347	C1qtnf9	protein_coding	2.3177e-06
aggregated_scATAC_peak_25540	chr14	60904258	60905095	NA	NA	0,1	NA	NA	NA	5.0714e-07
aggregated_scATAC_peak_25583	chr14	62178577	62179070	upstream	7698	1	ENSMUSG00000115531	AC159267.1	lincRNA	7.27657e-05
aggregated_scATAC_peak_25644	chr14	63283226	63284378	upstream	12110	1	ENSMUSG00000021944	Gata4	protein_coding	1.14307e-05
aggregated_scATAC_peak_25652	chr14	63356964	63357515	downstream	28020	1	ENSMUSG00000114892	AC090962.1	lincRNA	2.50798e-06
aggregated_scATAC_peak_25654	chr14	63359195	63359808	downstream	30282	1	ENSMUSG00000114892	AC090962.1	lincRNA	2.26476e-07
aggregated_scATAC_peak_25658	chr14	63368966	63369194	downstream	39860	1	ENSMUSG00000114892	AC090962.1	lincRNA	5.13354e-05
aggregated_scATAC_peak_25739	chr14	64970003	64970639	PeakInsideFeature	20276	1	ENSMUSG00000021975	Ints9	protein_coding	4.31946e-07
aggregated_scATAC_peak_25868	chr14	67000911	67002241	PeakInsideFeature	7301	1	ENSMUSG00000022051	Bnip3l	protein_coding	1.13689e-05
aggregated_scATAC_peak_25881	chr14	67206284	67206673	downstream	26651	1	ENSMUSG00000093744	Gm20675	lincRNA	1.07371e-05
aggregated_scATAC_peak_25967	chr14	69792462	69792803	PeakInsideFeature	13004	1	ENSMUSG00000022075	Rhobtb2	protein_coding	1.36436e-06
aggregated_scATAC_peak_26060	chr14	70783441	70783878	upstream	17032	1	ENSMUSG00000022100	Xpo7	protein_coding	2.32025e-07
aggregated_scATAC_peak_26069	chr14	71487673	71487980	NA	NA	0,1	NA	NA	NA	2.78886e-05
aggregated_scATAC_peak_26072	chr14	71660264	71660646	NA	NA	0,1	NA	NA	NA	1.62368e-06
aggregated_scATAC_peak_26145	chr14	74900295	74900897	upstream	25849	1	ENSMUSG00000115002	AC135083.1	antisense_RNA	9.19151e-07
aggregated_scATAC_peak_26260	chr14	76810659	76811614	upstream	21685	1	ENSMUSG00000115353	AC134577.1	lincRNA	6.52903e-06
aggregated_scATAC_peak_26275	chr14	77156213	77157993	overlapStart	340	0	ENSMUSG00000022012	Enox1	protein_coding	4.58357e-06
aggregated_scATAC_peak_26290	chr14	77706471	77706833	NA	NA	0,1	NA	NA	NA	2.09219e-06
aggregated_scATAC_peak_26300	chr14	78261359	78261559	upstream	15148	1	ENSMUSG00000080402	Gm23652	miRNA	7.40605e-05
aggregated_scATAC_peak_26335	chr14	79225339	79225753	PeakInsideFeature	21823	1	ENSMUSG00000071262	Zfp957	protein_coding	4.44796e-05
aggregated_scATAC_peak_26471	chr14	101063309	101063588	NA	NA	0,1	NA	NA	NA	3.09003e-06
aggregated_scATAC_peak_26474	chr14	101326243	101326995	upstream	16925	1	ENSMUSG00000115538	CT573019.1	processed_pseudogene	1.70681e-09
aggregated_scATAC_peak_26506	chr14	102402272	102402666	upstream	34554	1	ENSMUSG00000115696	AC080021.1	lincRNA	5.02195e-07
aggregated_scATAC_peak_26570	chr14	105374578	105375066	NA	NA	0,1	NA	NA	NA	8.96705e-05
aggregated_scATAC_peak_26572	chr14	105377754	105378179	upstream	49593	1	ENSMUSG00000115548	AC138716.2	lincRNA	3.62883e-06
aggregated_scATAC_peak_26589	chr14	105572426	105572979	upstream	16774	1	ENSMUSG00000115149	AC112142.1	processed_transcript	4.30261e-06
aggregated_scATAC_peak_26629	chr14	114952016	114952859	downstream	6439	1	ENSMUSG00000114979	AC163295.1	lincRNA	5.54458e-06
aggregated_scATAC_peak_26644	chr14	116449201	116449633	NA	NA	0,1	NA	NA	NA	3.03973e-05
aggregated_scATAC_peak_26664	chr14	117681331	117682148	NA	NA	0,1	NA	NA	NA	3.32573e-09
aggregated_scATAC_peak_26667	chr14	117890699	117890966	NA	NA	0,1	NA	NA	NA	3.81956e-05
aggregated_scATAC_peak_26854	chr14	121713070	121713973	NA	NA	0,1	NA	NA	NA	2.91894e-05
aggregated_scATAC_peak_27004	chr15	6974460	6974824	upstream	21395	1	ENSMUSG00000104334	Gm38282	TEC	5.45514e-05
aggregated_scATAC_peak_27076	chr15	8676269	8676917	upstream	21520	1	ENSMUSG00000103047	Gm37310	TEC	6.87271e-05
aggregated_scATAC_peak_27110	chr15	10250931	10251146	NA	NA	0,1	NA	NA	NA	2.09416e-05
aggregated_scATAC_peak_27121	chr15	10634204	10634469	downstream	34043	1	ENSMUSG00000115667	AC158921.1	antisense_RNA	1.66132e-05
aggregated_scATAC_peak_27126	chr15	10668120	10668995	PeakInsideFeature	46066	1	ENSMUSG00000022246	Rai14	protein_coding	1.04043e-05
aggregated_scATAC_peak_27203	chr15	12515279	12515614	NA	NA	0,1	NA	NA	NA	9.62499e-05
aggregated_scATAC_peak_27222	chr15	12778365	12779149	upstream	13382	1	ENSMUSG00000115119	AC135292.1	processed_pseudogene	1.32928e-07
aggregated_scATAC_peak_27362	chr15	27788166	27788875	NA	NA	0,1	NA	NA	NA	3.57435e-08
aggregated_scATAC_peak_27487	chr15	32920395	32921416	overlapStart	183	0	ENSMUSG00000022261	Sdc2	protein_coding	5.49692e-05
aggregated_scATAC_peak_27573	chr15	36380898	36381758	downstream	6279	1	ENSMUSG00000115278	AC115304.2	lincRNA	2.27284e-05
aggregated_scATAC_peak_27672	chr15	37568618	37569374	upstream	7166	1	ENSMUSG00000115095	AC122263.1	TEC	5.9124e-05
aggregated_scATAC_peak_27680	chr15	37803438	37804448	upstream	11373	1	ENSMUSG00000051359	Ncald	protein_coding	2.88048e-06
aggregated_scATAC_peak_27687	chr15	38169590	38170359	downstream	32243	1	ENSMUSG00000115680	AC122035.1	lincRNA	4.01618e-08
aggregated_scATAC_peak_27768	chr15	40046298	40046502	PeakInsideFeature	1209	0	ENSMUSG00000115142	AC152394.1	lincRNA	7.42488e-05
aggregated_scATAC_peak_27872	chr15	51924375	51924735	downstream	27468	1	ENSMUSG00000115616	AC160550.3	lincRNA	1.80199e-05
aggregated_scATAC_peak_27956	chr15	55440739	55441205	upstream	1952	0	ENSMUSG00000101568	1700040F17Rik	antisense_RNA	6.04045e-09
aggregated_scATAC_peak_28122	chr15	59597434	59597825	NA	NA	0,1	NA	NA	NA	1.3728e-05
aggregated_scATAC_peak_28140	chr15	59908343	59908638	downstream	21800	1	ENSMUSG00000115734	AC158122.1	processed_pseudogene	5.36881e-06
aggregated_scATAC_peak_28142	chr15	59945151	59945618	upstream	15094	1	ENSMUSG00000115734	AC158122.1	processed_pseudogene	5.05913e-05
aggregated_scATAC_peak_28158	chr15	60814283	60814762	upstream	7749	1	ENSMUSG00000097493	9930014A18Rik	processed_transcript	5.43583e-05
aggregated_scATAC_peak_28214	chr15	63052369	63053225	NA	NA	0,1	NA	NA	NA	3.90773e-05
aggregated_scATAC_peak_28225	chr15	63750107	63750747	upstream	1232	0	ENSMUSG00000115464	AC139350.1	lincRNA	5.48703e-05
aggregated_scATAC_peak_28226	chr15	63755597	63756355	upstream	4185	0	ENSMUSG00000115682	AC139350.3	processed_pseudogene	7.96223e-09
aggregated_scATAC_peak_28227	chr15	63757342	63758181	upstream	2399	0	ENSMUSG00000115682	AC139350.3	processed_pseudogene	3.66814e-09
aggregated_scATAC_peak_28228	chr15	63758317	63758549	upstream	1728	0	ENSMUSG00000115682	AC139350.3	processed_pseudogene	1.92383e-06
aggregated_scATAC_peak_28291	chr15	66731262	66731621	downstream	12885	1	ENSMUSG00000090464	Gm17140	antisense_RNA	1.29395e-05
aggregated_scATAC_peak_28296	chr15	66888262	66888768	upstream	2805	0	ENSMUSG00000005124	Wisp1	protein_coding	7.8386e-06
aggregated_scATAC_peak_28304	chr15	66984282	66984831	upstream	14916	1	ENSMUSG00000005125	Ndrg1	protein_coding	3.51013e-05
aggregated_scATAC_peak_28307	chr15	67036579	67036896	NA	NA	0,1	NA	NA	NA	1.70081e-05
aggregated_scATAC_peak_28311	chr15	67121017	67121977	upstream	7505	1	ENSMUSG00000013846	St3gal1	protein_coding	1.329e-06
aggregated_scATAC_peak_28433	chr15	73696730	73697827	PeakInsideFeature	10227	1	ENSMUSG00000045281	Gpr20	protein_coding	6.97852e-06
aggregated_scATAC_peak_28517	chr15	74923476	74924145	upstream	637	0	ENSMUSG00000100880	Gm6610	unprocessed_pseudogene	2.59566e-07
aggregated_scATAC_peak_28899	chr15	79166789	79167121	PeakInsideFeature	914	0	ENSMUSG00000075555	Gm10863	antisense_RNA	7.76986e-05
aggregated_scATAC_peak_29032	chr15	80409223	80409480	downstream	48822	1	ENSMUSG00000088740	Gm23220	snoRNA	2.69245e-05
aggregated_scATAC_peak_29280	chr15	83638957	83639718	upstream	44181	1	ENSMUSG00000016757	Ttll12	protein_coding	9.82266e-11
aggregated_scATAC_peak_29283	chr15	83666400	83666884	NA	NA	0,1	NA	NA	NA	2.53702e-06
aggregated_scATAC_peak_29353	chr15	84591882	84592248	upstream	34242	1	ENSMUSG00000055745	Rtl6	protein_coding	8.9572e-07
aggregated_scATAC_peak_29374	chr15	84743223	84744657	PeakInsideFeature	23888	1	ENSMUSG00000078954	Arhgap8	protein_coding	1.67461e-06
aggregated_scATAC_peak_29558	chr15	86903500	86903974	NA	NA	0,1	NA	NA	NA	8.434e-05
aggregated_scATAC_peak_29615	chr15	89020139	89020465	downstream	1081	0	ENSMUSG00000064481	Gm23737	snRNA	1.5588e-05
aggregated_scATAC_peak_29775	chr15	94139553	94139907	NA	NA	0,1	NA	NA	NA	1.49334e-06
aggregated_scATAC_peak_29856	chr15	96491292	96492648	upstream	31127	1	ENSMUSG00000033228	Scaf11	protein_coding	1.19662e-05
aggregated_scATAC_peak_29901	chr15	97102831	97103443	upstream	47181	1	ENSMUSG00000022464	Slc38a4	protein_coding	6.72721e-06
aggregated_scATAC_peak_30417	chr15	102310523	102310777	PeakInsideFeature	14357	1	ENSMUSG00000058290	Espl1	protein_coding	1.22708e-05
aggregated_scATAC_peak_30427	chr15	102370695	102371272	upstream	2896	0	ENSMUSG00000088286	Gm23590	snRNA	6.25774e-05
aggregated_scATAC_peak_30500	chr15	103050839	103051407	downstream	8183	1	ENSMUSG00000102297	5730585A16Rik	TEC	2.14238e-05
aggregated_scATAC_peak_30507	chr15	103096694	103097075	PeakInsideFeature	5227	1	ENSMUSG00000101356	Gm28876	lincRNA	4.50394e-06
aggregated_scATAC_peak_30550	chr15	103358620	103359571	PeakInsideFeature	7667	1	ENSMUSG00000000555	Itga5	protein_coding	4.21647e-05
aggregated_scATAC_peak_30603	chr16	4596162	4596637	PeakInsideFeature	1687	0	ENSMUSG00000014303	Glis2	protein_coding	7.14022e-05
aggregated_scATAC_peak_30615	chr16	4658606	4659283	PeakInsideFeature	18955	1	ENSMUSG00000004069	Dnaja3	protein_coding	1.4394e-06
aggregated_scATAC_peak_30663	chr16	5455473	5455915	NA	NA	0,1	NA	NA	NA	6.38922e-05
aggregated_scATAC_peak_30675	chr16	5845684	5845953	NA	NA	0,1	NA	NA	NA	3.61113e-07
aggregated_scATAC_peak_30785	chr16	10454020	10454995	upstream	7146	1	ENSMUSG00000050908	Tvp23a	protein_coding	4.35428e-06
aggregated_scATAC_peak_30800	chr16	10664830	10665920	downstream	18164	1	ENSMUSG00000087384	Gm15558	antisense_RNA	4.43254e-06
aggregated_scATAC_peak_30873	chr16	11710059	11710298	upstream	18321	1	ENSMUSG00000085732	Gm4279	antisense_RNA	1.77244e-05
aggregated_scATAC_peak_30899	chr16	13357751	13358877	NA	NA	0,1	NA	NA	NA	1.11495e-07
aggregated_scATAC_peak_30932	chr16	14060067	14060558	upstream	7091	1	ENSMUSG00000083536	Gm15808	processed_pseudogene	1.84225e-05
aggregated_scATAC_peak_30952	chr16	14992362	14993033	NA	NA	0,1	NA	NA	NA	2.58611e-08
aggregated_scATAC_peak_30953	chr16	15052588	15054163	NA	NA	0,1	NA	NA	NA	1.04699e-08
aggregated_scATAC_peak_30954	chr16	15084434	15085326	NA	NA	0,1	NA	NA	NA	8.19022e-06
aggregated_scATAC_peak_30973	chr16	16204282	16204565	upstream	8894	1	ENSMUSG00000041957	Pkp2	protein_coding	1.27541e-06
aggregated_scATAC_peak_31115	chr16	18555263	18555624	downstream	31525	1	ENSMUSG00000009097	Tbx1	protein_coding	2.00968e-06
aggregated_scATAC_peak_31218	chr16	21210388	21211395	PeakInsideFeature	6137	1	ENSMUSG00000005958	Ephb3	protein_coding	5.27509e-07
aggregated_scATAC_peak_31222	chr16	21240460	21241070	downstream	15301	1	ENSMUSG00000098400	Mir7680	miRNA	9.66627e-07
aggregated_scATAC_peak_31388	chr16	24023418	24024065	upstream	34890	1	ENSMUSG00000022508	Bcl6	protein_coding	1.23396e-06
aggregated_scATAC_peak_31393	chr16	24153959	24154344	NA	NA	0,1	NA	NA	NA	3.26584e-05
aggregated_scATAC_peak_31408	chr16	24501610	24501990	NA	NA	0,1	NA	NA	NA	5.14946e-06
aggregated_scATAC_peak_31450	chr16	26078771	26079412	PeakInsideFeature	26692	1	ENSMUSG00000038168	P3h2	protein_coding	3.63154e-08
aggregated_scATAC_peak_31455	chr16	26185739	26186404	NA	NA	0,1	NA	NA	NA	9.87656e-07
aggregated_scATAC_peak_31492	chr16	29165907	29166251	upstream	43616	1	ENSMUSG00000022525	Hrasls	protein_coding	3.35844e-05
aggregated_scATAC_peak_31493	chr16	29197996	29198903	upstream	11245	1	ENSMUSG00000022525	Hrasls	protein_coding	2.99382e-07
aggregated_scATAC_peak_31511	chr16	29729777	29730457	NA	NA	0,1	NA	NA	NA	3.66871e-06
aggregated_scATAC_peak_31512	chr16	29734336	29735687	NA	NA	0,1	NA	NA	NA	1.00583e-07
aggregated_scATAC_peak_31766	chr16	32708137	32708833	upstream	18181	1	ENSMUSG00000098225	Gm9556	processed_pseudogene	9.71391e-06
aggregated_scATAC_peak_31808	chr16	33346367	33346737	downstream	34175	1	ENSMUSG00000097318	1700007L15Rik	lincRNA	4.15095e-06
aggregated_scATAC_peak_31930	chr16	34804356	34804948	NA	NA	0,1	NA	NA	NA	6.88752e-05
aggregated_scATAC_peak_32101	chr16	38350233	38350773	PeakInsideFeature	3463	1	ENSMUSG00000095464	Gm21987	protein_coding	5.34546e-05
aggregated_scATAC_peak_32102	chr16	38361587	38362475	overlapStart	178	0	ENSMUSG00000022803	Popdc2	protein_coding	1.11403e-06
aggregated_scATAC_peak_32122	chr16	38672393	38672674	downstream	13335	1	ENSMUSG00000081651	Gm15530	processed_pseudogene	3.85074e-05
aggregated_scATAC_peak_32143	chr16	38938726	38939228	downstream	11768	1	ENSMUSG00000089607	Gm22500	snRNA	1.21629e-05
aggregated_scATAC_peak_32144	chr16	38943683	38944463	downstream	16864	1	ENSMUSG00000089607	Gm22500	snRNA	3.61512e-06
aggregated_scATAC_peak_32161	chr16	41532561	41533560	NA	NA	0,1	NA	NA	NA	2.9238e-05
aggregated_scATAC_peak_32199	chr16	43575176	43575937	NA	NA	0,1	NA	NA	NA	3.16612e-06
aggregated_scATAC_peak_32205	chr16	43772488	43772725	PeakInsideFeature	10385	1	ENSMUSG00000022705	Drd3	protein_coding	1.23126e-05
aggregated_scATAC_peak_32231	chr16	44463511	44463821	NA	NA	0,1	NA	NA	NA	5.22747e-05
aggregated_scATAC_peak_32239	chr16	44549912	44550504	downstream	7921	1	ENSMUSG00000093046	Mir3081	miRNA	4.37239e-05
aggregated_scATAC_peak_32262	chr16	45120846	45121318	PeakInsideFeature	27680	1	ENSMUSG00000022665	Ccdc80	protein_coding	4.60436e-06
aggregated_scATAC_peak_32305	chr16	46738087	46738321	NA	NA	0,1	NA	NA	NA	2.39894e-05
aggregated_scATAC_peak_32351	chr16	50467132	50467536	upstream	34944	1	ENSMUSG00000022641	Bbx	protein_coding	3.79861e-05
aggregated_scATAC_peak_32359	chr16	50607923	50608473	upstream	17044	1	ENSMUSG00000050685	Ccdc54	protein_coding	1.11358e-05
aggregated_scATAC_peak_32360	chr16	50701113	50701575	upstream	25788	1	ENSMUSG00000098482	Mir6363	miRNA	3.98444e-05
aggregated_scATAC_peak_32361	chr16	50702204	50702960	upstream	24550	1	ENSMUSG00000098482	Mir6363	miRNA	3.25276e-07
aggregated_scATAC_peak_32393	chr16	52745834	52746221	NA	NA	0,1	NA	NA	NA	6.44293e-05
aggregated_scATAC_peak_32395	chr16	52863239	52863864	NA	NA	0,1	NA	NA	NA	4.26099e-09
aggregated_scATAC_peak_32426	chr16	56349520	56349770	NA	NA	0,1	NA	NA	NA	9.1386e-05
aggregated_scATAC_peak_32450	chr16	57427552	57427837	NA	NA	0,1	NA	NA	NA	5.82267e-05
aggregated_scATAC_peak_32538	chr16	72234307	72234666	NA	NA	0,1	NA	NA	NA	4.57124e-05
aggregated_scATAC_peak_32559	chr16	73222948	73223323	NA	NA	0,1	NA	NA	NA	1.61268e-08
aggregated_scATAC_peak_32658	chr16	81139860	81140390	NA	NA	0,1	NA	NA	NA	2.39894e-05
aggregated_scATAC_peak_32703	chr16	86719025	86719801	NA	NA	0,1	NA	NA	NA	6.13189e-05
aggregated_scATAC_peak_32709	chr16	87239157	87239625	NA	NA	0,1	NA	NA	NA	7.238e-06
aggregated_scATAC_peak_32849	chr16	90921233	90922111	downstream	6492	1	ENSMUSG00000083226	Gm7831	processed_pseudogene	9.55927e-05
aggregated_scATAC_peak_32942	chr16	92183149	92184176	NA	NA	0,1	NA	NA	NA	4.66991e-06
aggregated_scATAC_peak_33001	chr16	92778123	92778575	PeakInsideFeature	47800	1	ENSMUSG00000022952	Runx1	protein_coding	3.20665e-05
aggregated_scATAC_peak_33009	chr16	92939535	92939926	NA	NA	0,1	NA	NA	NA	2.09513e-06
aggregated_scATAC_peak_33017	chr16	93071494	93072536	upstream	740	0	ENSMUSG00000098983	Gm28003	miRNA	2.56103e-05
aggregated_scATAC_peak_33343	chr17	3435935	3436320	downstream	26204	1	ENSMUSG00000115039	AC122350.1	processed_pseudogene	2.43927e-05
aggregated_scATAC_peak_33379	chr17	5086012	5086295	downstream	25956	1	ENSMUSG00000081783	Gm15599	processed_pseudogene	7.17493e-06
aggregated_scATAC_peak_33695	chr17	12529725	12530350	upstream	22334	1	ENSMUSG00000023828	Slc22a3	protein_coding	2.29235e-05
aggregated_scATAC_peak_33700	chr17	12631755	12632151	downstream	43885	1	ENSMUSG00000023829	Slc22a1	protein_coding	6.14242e-06
aggregated_scATAC_peak_33701	chr17	12636011	12637729	downstream	38968	1	ENSMUSG00000023829	Slc22a1	protein_coding	2.78009e-10
aggregated_scATAC_peak_33717	chr17	12801949	12802486	upstream	16575	1	ENSMUSG00000089769	Gm16574	processed_pseudogene	5.69674e-06
aggregated_scATAC_peak_33734	chr17	13495742	13496163	upstream	6247	1	ENSMUSG00000090211	Gm16050	lincRNA	1.03778e-06
aggregated_scATAC_peak_33748	chr17	13709055	13710055	upstream	26039	1	ENSMUSG00000085705	Gm16046	processed_transcript	9.85403e-06
aggregated_scATAC_peak_33780	chr17	14227468	14227903	upstream	23855	1	ENSMUSG00000048826	Dact2	protein_coding	4.14926e-05
aggregated_scATAC_peak_33791	chr17	14353201	14354027	NA	NA	0,1	NA	NA	NA	3.7606e-05
aggregated_scATAC_peak_33794	chr17	14391977	14392823	NA	NA	0,1	NA	NA	NA	6.86986e-07
aggregated_scATAC_peak_33797	chr17	14475831	14476947	NA	NA	0,1	NA	NA	NA	3.30278e-06
aggregated_scATAC_peak_33803	chr17	14539920	14540993	NA	NA	0,1	NA	NA	NA	3.66016e-06
aggregated_scATAC_peak_33874	chr17	17402507	17403100	overlapStart	132	0	ENSMUSG00000047786	Lix1	protein_coding	1.13276e-05
aggregated_scATAC_peak_33877	chr17	17438625	17439162	PeakInsideFeature	36222	1	ENSMUSG00000047786	Lix1	protein_coding	1.52018e-07
aggregated_scATAC_peak_34070	chr17	25083268	25083937	upstream	2421	0	ENSMUSG00000024168	Tmem204	protein_coding	8.68953e-08
aggregated_scATAC_peak_34120	chr17	25593460	25594544	PeakInsideFeature	14828	1	ENSMUSG00000002279	Lmf1	protein_coding	4.82876e-05
aggregated_scATAC_peak_34405	chr17	28304071	28304671	upstream	9159	1	ENSMUSG00000007570	Fance	protein_coding	6.65965e-05
aggregated_scATAC_peak_34528	chr17	29450779	29451932	upstream	39456	1	ENSMUSG00000024014	Pim1	protein_coding	2.5427e-05
aggregated_scATAC_peak_34618	chr17	30468434	30468815	upstream	16037	1	ENSMUSG00000103207	Gm9874	TEC	7.79246e-06
aggregated_scATAC_peak_34704	chr17	31391327	31391733	PeakInsideFeature	5296	1	ENSMUSG00000041119	Pde9a	protein_coding	3.00331e-05
aggregated_scATAC_peak_34711	chr17	31442578	31443074	NA	NA	0,1	NA	NA	NA	1.74111e-05
aggregated_scATAC_peak_34721	chr17	31557404	31557874	PeakInsideFeature	513	0	ENSMUSG00000013562	4833413E03Rik	lincRNA	1.37554e-06
aggregated_scATAC_peak_34760	chr17	31892611	31893309	upstream	37168	1	ENSMUSG00000024042	Sik1	protein_coding	5.21333e-06
aggregated_scATAC_peak_35197	chr17	40605207	40605655	downstream	6837	1	ENSMUSG00000095540	Esp4	protein_coding	9.42953e-08
aggregated_scATAC_peak_35228	chr17	43055560	43055791	PeakInsideFeature	39121	1	ENSMUSG00000023915	Tnfrsf21	protein_coding	9.85828e-05
aggregated_scATAC_peak_35293	chr17	44443555	44443792	NA	NA	0,1	NA	NA	NA	7.06649e-05
aggregated_scATAC_peak_35312	chr17	45252608	45252830	downstream	42753	1	ENSMUSG00000096425	Gm24979	miRNA	2.02016e-06
aggregated_scATAC_peak_35315	chr17	45282056	45282381	NA	NA	0,1	NA	NA	NA	4.04988e-05
aggregated_scATAC_peak_35319	chr17	45399877	45400686	PeakInsideFeature	33425	1	ENSMUSG00000023932	Cdc5l	protein_coding	1.26054e-06
aggregated_scATAC_peak_35381	chr17	45863525	45864800	NA	NA	0,1	NA	NA	NA	4.41798e-07
aggregated_scATAC_peak_35382	chr17	45869043	45869735	NA	NA	0,1	NA	NA	NA	1.10582e-07
aggregated_scATAC_peak_35469	chr17	46628681	46630438	overlapStart	56	0	ENSMUSG00000023972	Ptk7	protein_coding	1.79951e-06
aggregated_scATAC_peak_35528	chr17	47450215	47450642	upstream	13052	1	ENSMUSG00000047150	1700001C19Rik	protein_coding	2.31484e-05
aggregated_scATAC_peak_35666	chr17	49278902	49279599	upstream	13492	1	ENSMUSG00000064541	Gm22978	snRNA	9.159e-07
aggregated_scATAC_peak_35682	chr17	49582422	49582891	upstream	18313	1	ENSMUSG00000040260	Daam2	protein_coding	1.10109e-06
aggregated_scATAC_peak_35695	chr17	49889296	49890174	downstream	6232	1	ENSMUSG00000090227	Gm16554	antisense_RNA	4.34311e-05
aggregated_scATAC_peak_35721	chr17	50735478	50735778	downstream	37103	1	ENSMUSG00000044645	Gm7334	protein_coding	3.5716e-05
aggregated_scATAC_peak_35853	chr17	56778982	56779432	downstream	8957	1	ENSMUSG00000090273	Prr22	protein_coding	1.23558e-05
aggregated_scATAC_peak_35944	chr17	63008074	63008699	NA	NA	0,1	NA	NA	NA	1.3599e-05
aggregated_scATAC_peak_36035	chr17	66315065	66315973	NA	NA	0,1	NA	NA	NA	3.00119e-06
aggregated_scATAC_peak_36051	chr17	66417647	66418442	upstream	4060	0	ENSMUSG00000093686	Gm4705	processed_pseudogene	6.33677e-05
aggregated_scATAC_peak_36083	chr17	67209161	67209364	NA	NA	0,1	NA	NA	NA	1.8472e-05
aggregated_scATAC_peak_36238	chr17	71698176	71698729	downstream	19365	1	ENSMUSG00000089779	Gm15641	antisense_RNA	1.01096e-06
aggregated_scATAC_peak_36262	chr17	72658702	72659439	downstream	41375	1	ENSMUSG00000098193	Gm26963	processed_pseudogene	4.50969e-05
aggregated_scATAC_peak_36286	chr17	73060282	73060842	upstream	47423	1	ENSMUSG00000054469	Lclat1	protein_coding	2.07962e-05
aggregated_scATAC_peak_36287	chr17	73072199	73072988	upstream	35391	1	ENSMUSG00000054469	Lclat1	protein_coding	8.59066e-05
aggregated_scATAC_peak_36308	chr17	73654208	73654808	upstream	14288	1	ENSMUSG00000090168	D630014O11Rik	sense_intronic	5.91989e-07
aggregated_scATAC_peak_36334	chr17	74813031	74813304	NA	NA	0,1	NA	NA	NA	6.98185e-07
aggregated_scATAC_peak_36342	chr17	75014005	75014286	PeakInsideFeature	8578	1	ENSMUSG00000001870	Ltbp1	protein_coding	5.86747e-05
aggregated_scATAC_peak_36347	chr17	75087216	75087942	NA	NA	0,1	NA	NA	NA	1.50408e-05
aggregated_scATAC_peak_36351	chr17	75206335	75206643	downstream	41282	1	ENSMUSG00000084025	Gm6276	processed_pseudogene	3.10891e-05
aggregated_scATAC_peak_36439	chr17	79563486	79564358	upstream	47941	1	ENSMUSG00000036368	Rmdn2	protein_coding	1.65484e-07
aggregated_scATAC_peak_36445	chr17	79657798	79658080	PeakInsideFeature	46076	1	ENSMUSG00000036368	Rmdn2	protein_coding	1.2561e-05
aggregated_scATAC_peak_36533	chr17	81010758	81011402	NA	NA	0,1	NA	NA	NA	6.37523e-07
aggregated_scATAC_peak_36538	chr17	81270310	81270627	NA	NA	0,1	NA	NA	NA	7.82107e-05
aggregated_scATAC_peak_36544	chr17	81740405	81740775	NA	NA	0,1	NA	NA	NA	2.61391e-05
aggregated_scATAC_peak_36553	chr17	83072307	83072556	downstream	3527	1	ENSMUSG00000100154	Gm29052	lincRNA	4.93619e-06
aggregated_scATAC_peak_36561	chr17	83122663	83123516	NA	NA	0,1	NA	NA	NA	7.60856e-08
aggregated_scATAC_peak_36622	chr17	83889706	83890787	upstream	35853	1	ENSMUSG00000097254	C430042M11Rik	lincRNA	7.62599e-05
aggregated_scATAC_peak_36624	chr17	83902262	83902513	upstream	45200	1	ENSMUSG00000088193	Gm23905	rRNA	4.06581e-05
aggregated_scATAC_peak_36628	chr17	83927408	83928328	upstream	19720	1	ENSMUSG00000088193	Gm23905	rRNA	4.98157e-07
aggregated_scATAC_peak_36630	chr17	83946665	83947389	upstream	561	0	ENSMUSG00000088193	Gm23905	rRNA	4.4597e-05
aggregated_scATAC_peak_36634	chr17	83964449	83965194	downstream	17234	1	ENSMUSG00000088193	Gm23905	rRNA	6.81246e-05
aggregated_scATAC_peak_36647	chr17	84081793	84082438	NA	NA	0,1	NA	NA	NA	9.57239e-05
aggregated_scATAC_peak_36696	chr17	84736825	84737179	NA	NA	0,1	NA	NA	NA	3.69987e-05
aggregated_scATAC_peak_36785	chr17	86323365	86323589	upstream	36299	1	ENSMUSG00000100738	2010106C02Rik	antisense_RNA	1.06769e-05
aggregated_scATAC_peak_36790	chr17	86358424	86358828	NA	NA	0,1	NA	NA	NA	6.94694e-08
aggregated_scATAC_peak_36953	chr17	89412828	89413315	NA	NA	0,1	NA	NA	NA	3.70769e-07
aggregated_scATAC_peak_36993	chr18	3548055	3548515	downstream	40328	1	ENSMUSG00000024232	Bambi	protein_coding	2.48744e-05
aggregated_scATAC_peak_37007	chr18	4121429	4122156	upstream	44040	1	ENSMUSG00000024233	Lyzl1	protein_coding	2.51592e-07
aggregated_scATAC_peak_37009	chr18	4136469	4138152	upstream	28522	1	ENSMUSG00000024233	Lyzl1	protein_coding	3.77082e-09
aggregated_scATAC_peak_37022	chr18	4551567	4552400	NA	NA	0,1	NA	NA	NA	2.27634e-06
aggregated_scATAC_peak_37062	chr18	5459113	5459547	NA	NA	0,1	NA	NA	NA	8.02806e-08
aggregated_scATAC_peak_37087	chr18	6882976	6883598	NA	NA	0,1	NA	NA	NA	1.67603e-06
aggregated_scATAC_peak_37132	chr18	9576417	9577110	upstream	37550	1	ENSMUSG00000088996	Gm22765	snoRNA	2.73573e-07
aggregated_scATAC_peak_37136	chr18	9778882	9779340	upstream	15849	1	ENSMUSG00000089054	Gm23350	snRNA	1.19058e-06
aggregated_scATAC_peak_37141	chr18	9841180	9841543	upstream	14243	1	ENSMUSG00000092816	Gm23637	miRNA	3.21444e-05
aggregated_scATAC_peak_37197	chr18	11044454	11044907	upstream	7830	1	ENSMUSG00000005836	Gata6	protein_coding	9.87414e-07
aggregated_scATAC_peak_37229	chr18	11883309	11884528	upstream	43049	1	ENSMUSG00000097440	Gm6277	antisense_RNA	2.86251e-06
aggregated_scATAC_peak_37389	chr18	16547566	16548016	NA	NA	0,1	NA	NA	NA	7.05877e-05
aggregated_scATAC_peak_37390	chr18	16675189	16675612	NA	NA	0,1	NA	NA	NA	5.09575e-06
aggregated_scATAC_peak_37395	chr18	16715584	16715784	upstream	13049	1	ENSMUSG00000085575	Gm15485	antisense_RNA	5.01805e-05
aggregated_scATAC_peak_37397	chr18	16745075	16745347	downstream	16478	1	ENSMUSG00000085575	Gm15485	antisense_RNA	2.19508e-05
aggregated_scATAC_peak_37400	chr18	16808090	16809885	overlapStart	258	0	ENSMUSG00000024304	Cdh2	protein_coding	1.86541e-07
aggregated_scATAC_peak_37402	chr18	16823819	16824381	downstream	8379	1	ENSMUSG00000086095	Gm15328	lincRNA	9.60202e-08
aggregated_scATAC_peak_37594	chr18	30762865	30763334	NA	NA	0,1	NA	NA	NA	6.62189e-05
aggregated_scATAC_peak_37618	chr18	31954680	31955216	upstream	5312	1	ENSMUSG00000052229	Gpr17	protein_coding	2.87768e-05
aggregated_scATAC_peak_37907	chr18	37178223	37178933	overlapStart	56	0	ENSMUSG00000097430	Gm10544	processed_transcript	2.67056e-05
aggregated_scATAC_peak_38054	chr18	40068532	40068732	NA	NA	0,1	NA	NA	NA	3.81253e-05
aggregated_scATAC_peak_38075	chr18	42162632	42163609	upstream	10250	1	ENSMUSG00000034339	Gm5689	protein_coding	8.78317e-05
aggregated_scATAC_peak_38102	chr18	42873150	42873467	NA	NA	0,1	NA	NA	NA	9.27688e-05
aggregated_scATAC_peak_38123	chr18	43370579	43371190	NA	NA	0,1	NA	NA	NA	8.27866e-09
aggregated_scATAC_peak_38144	chr18	44498087	44498773	NA	NA	0,1	NA	NA	NA	3.93785e-06
aggregated_scATAC_peak_38181	chr18	46344222	46344996	upstream	22756	1	ENSMUSG00000095541	Gm24617	miRNA	5.4016e-06
aggregated_scATAC_peak_38257	chr18	49708488	49708910	PeakInsideFeature	46902	1	ENSMUSG00000024505	Dtwd2	protein_coding	9.07157e-07
aggregated_scATAC_peak_38279	chr18	50087313	50087963	upstream	33794	1	ENSMUSG00000086600	C030005K06Rik	processed_transcript	1.1898e-05
aggregated_scATAC_peak_38310	chr18	52941938	52942540	NA	NA	0,1	NA	NA	NA	2.30725e-08
aggregated_scATAC_peak_38331	chr18	53425724	53426325	upstream	8017	1	ENSMUSG00000024538	Ppic	protein_coding	1.87895e-05
aggregated_scATAC_peak_38337	chr18	53479778	53480517	PeakInsideFeature	15602	1	ENSMUSG00000069378	Prdm6	protein_coding	2.69982e-05
aggregated_scATAC_peak_38346	chr18	53595803	53597061	NA	NA	0,1	NA	NA	NA	9.51482e-07
aggregated_scATAC_peak_38364	chr18	54233918	54234801	NA	NA	0,1	NA	NA	NA	1.973e-06
aggregated_scATAC_peak_38425	chr18	55375616	55376049	downstream	36320	1	ENSMUSG00000104455	Gm37828	TEC	1.94693e-07
aggregated_scATAC_peak_38490	chr18	57269261	57269585	NA	NA	0,1	NA	NA	NA	9.35863e-06
aggregated_scATAC_peak_38496	chr18	57391908	57392186	PeakInsideFeature	37314	1	ENSMUSG00000024594	Prrc1	protein_coding	1.68879e-07
aggregated_scATAC_peak_38724	chr18	62017400	62017723	NA	NA	0,1	NA	NA	NA	1.63516e-05
aggregated_scATAC_peak_38726	chr18	62043987	62044580	NA	NA	0,1	NA	NA	NA	8.87587e-06
aggregated_scATAC_peak_38909	chr18	66075352	66076230	NA	NA	0,1	NA	NA	NA	3.65137e-05
aggregated_scATAC_peak_38923	chr18	66308899	66309166	upstream	6293	1	ENSMUSG00000046318	Ccbe1	protein_coding	1.92238e-05
aggregated_scATAC_peak_38925	chr18	66327553	66327834	upstream	24955	1	ENSMUSG00000046318	Ccbe1	protein_coding	2.1481e-05
aggregated_scATAC_peak_38931	chr18	66442563	66442952	upstream	15846	1	ENSMUSG00000024521	Pmaip1	protein_coding	8.64657e-05
aggregated_scATAC_peak_39155	chr18	74846902	74847887	NA	NA	0,1	NA	NA	NA	4.64096e-05
aggregated_scATAC_peak_39215	chr18	75434385	75435421	NA	NA	0,1	NA	NA	NA	8.04333e-05
aggregated_scATAC_peak_39220	chr18	75462452	75463042	NA	NA	0,1	NA	NA	NA	6.53788e-05
aggregated_scATAC_peak_39230	chr18	75514076	75515022	overlapStart	96	0	ENSMUSG00000097712	Gm10532	lincRNA	4.82232e-06
aggregated_scATAC_peak_39232	chr18	75576676	75576921	NA	NA	0,1	NA	NA	NA	8.72478e-06
aggregated_scATAC_peak_39293	chr18	76553706	76554056	NA	NA	0,1	NA	NA	NA	2.29534e-05
aggregated_scATAC_peak_39480	chr18	81019162	81019593	upstream	7395	1	ENSMUSG00000089257	Gm25718	snRNA	5.24557e-05
aggregated_scATAC_peak_39489	chr18	81222783	81222996	downstream	13176	1	ENSMUSG00000097181	4930594M17Rik	lincRNA	6.64923e-05
aggregated_scATAC_peak_39591	chr18	83224217	83225253	NA	NA	0,1	NA	NA	NA	7.16818e-08
aggregated_scATAC_peak_39608	chr18	83928362	83929142	NA	NA	0,1	NA	NA	NA	3.52706e-07
aggregated_scATAC_peak_39687	chr19	3423907	3424228	upstream	9596	1	ENSMUSG00000024907	Gal	protein_coding	8.70271e-05
aggregated_scATAC_peak_39694	chr19	3642300	3642885	PeakInsideFeature	43972	1	ENSMUSG00000024913	Lrp5	protein_coding	2.73444e-07
aggregated_scATAC_peak_40177	chr19	9052951	9053514	downstream	34726	1	ENSMUSG00000024653	Scgb1a1	protein_coding	9.301e-06
aggregated_scATAC_peak_40224	chr19	10221638	10222034	upstream	17667	1	ENSMUSG00000024742	Fen1	protein_coding	2.24028e-09
aggregated_scATAC_peak_40227	chr19	10231016	10231988	PeakInsideFeature	9246	1	ENSMUSG00000036098	Myrf	protein_coding	7.61335e-11
aggregated_scATAC_peak_40254	chr19	10425428	10426136	downstream	31665	1	ENSMUSG00000090291	Lrrc10b	protein_coding	1.52921e-07
aggregated_scATAC_peak_40419	chr19	16528202	16528487	NA	NA	0,1	NA	NA	NA	4.80085e-06
aggregated_scATAC_peak_40606	chr19	24163900	24164333	NA	NA	0,1	NA	NA	NA	1.21784e-05
aggregated_scATAC_peak_40645	chr19	24811451	24811747	NA	NA	0,1	NA	NA	NA	5.05324e-06
aggregated_scATAC_peak_40647	chr19	24848334	24848973	PeakInsideFeature	13201	1	ENSMUSG00000041731	Pgm5	protein_coding	2.07207e-08
aggregated_scATAC_peak_40730	chr19	26597000	26597329	upstream	7886	1	ENSMUSG00000024921	Smarca2	protein_coding	1.92994e-05
aggregated_scATAC_peak_40746	chr19	26930565	26931122	downstream	44919	1	ENSMUSG00000074913	Gm815	protein_coding	1.69474e-05
aggregated_scATAC_peak_40751	chr19	27145714	27146307	NA	NA	0,1	NA	NA	NA	2.571e-06
aggregated_scATAC_peak_40874	chr19	30826283	30826615	NA	NA	0,1	NA	NA	NA	2.77937e-05
aggregated_scATAC_peak_40890	chr19	31702723	31702971	NA	NA	0,1	NA	NA	NA	4.91687e-05
aggregated_scATAC_peak_40896	chr19	31808193	31808428	upstream	43277	1	ENSMUSG00000052920	Prkg1	protein_coding	1.24372e-05
aggregated_scATAC_peak_40899	chr19	32019740	32020136	PeakInsideFeature	41531	1	ENSMUSG00000024887	Asah2	protein_coding	1.67295e-06
aggregated_scATAC_peak_40962	chr19	34255201	34255777	overlapStart	153	0	ENSMUSG00000035783	Acta2	protein_coding	2.94443e-07
aggregated_scATAC_peak_41033	chr19	36788284	36788484	upstream	45848	1	ENSMUSG00000024811	Tnks2	protein_coding	3.17145e-05
aggregated_scATAC_peak_41131	chr19	38251643	38252046	upstream	12692	1	ENSMUSG00000067242	Lgi1	protein_coding	2.03898e-06
aggregated_scATAC_peak_41234	chr19	41112818	41113776	upstream	36184	1	ENSMUSG00000050121	Opalin	protein_coding	1.53295e-05
aggregated_scATAC_peak_41269	chr19	41693820	41694277	PeakInsideFeature	49617	1	ENSMUSG00000025020	Slit1	protein_coding	9.96634e-06
aggregated_scATAC_peak_41397	chr19	43599219	43600309	downstream	10861	1	ENSMUSG00000092250	Gm20467	lincRNA	2.93374e-06
aggregated_scATAC_peak_41533	chr19	44907869	44908819	upstream	22775	1	ENSMUSG00000036097	Slf2	protein_coding	2.55886e-05
aggregated_scATAC_peak_41535	chr19	44924596	44925245	upstream	6199	1	ENSMUSG00000036097	Slf2	protein_coding	7.74535e-09
aggregated_scATAC_peak_41558	chr19	45083705	45084351	downstream	8787	1	ENSMUSG00000025213	Kazald1	protein_coding	3.28396e-07
aggregated_scATAC_peak_41723	chr19	46628405	46628808	PeakInsideFeature	29522	1	ENSMUSG00000047731	Wbp1l	protein_coding	6.31312e-07
aggregated_scATAC_peak_41797	chr19	47427726	47429126	PeakInsideFeature	35985	1	ENSMUSG00000053617	Sh3pxd2a	protein_coding	3.57143e-05
aggregated_scATAC_peak_41811	chr19	47563663	47564290	upstream	15702	1	ENSMUSG00000025060	Slk	protein_coding	6.81635e-08
aggregated_scATAC_peak_41939	chr19	53670476	53671723	upstream	6206	1	ENSMUSG00000043639	Rbm20	protein_coding	3.13445e-05
aggregated_scATAC_peak_41944	chr19	53716572	53716883	PeakInsideFeature	39422	1	ENSMUSG00000043639	Rbm20	protein_coding	5.16722e-05
aggregated_scATAC_peak_42124	chr19	56974250	56974694	PeakInsideFeature	33756	1	ENSMUSG00000025083	Afap1l2	protein_coding	1.78203e-05
aggregated_scATAC_peak_42174	chr19	57490933	57491430	upstream	29629	1	ENSMUSG00000097374	Gm26874	lincRNA	1.37498e-06
aggregated_scATAC_peak_42204	chr19	58329141	58329484	NA	NA	0,1	NA	NA	NA	3.3362e-06
aggregated_scATAC_peak_84521	chrX	7080102	7080472	downstream	12768	1	ENSMUSG00000050089	Akap4	protein_coding	1.5871e-05
aggregated_scATAC_peak_84629	chrX	10776048	10776801	NA	NA	0,1	NA	NA	NA	6.23833e-05
aggregated_scATAC_peak_85021	chrX	51907542	51907912	NA	NA	0,1	NA	NA	NA	4.1277e-05
aggregated_scATAC_peak_85111	chrX	57033662	57033902	upstream	9292	1	ENSMUSG00000031130	Brs3	protein_coding	3.09003e-06
aggregated_scATAC_peak_85245	chrX	73685667	73686190	downstream	12778	1	ENSMUSG00000019558	Slc6a8	protein_coding	3.98278e-08
aggregated_scATAC_peak_85396	chrX	95478095	95478480	upstream	33416	1	ENSMUSG00000050332	Amer1	protein_coding	1.97832e-05
aggregated_scATAC_peak_85439	chrX	99176214	99176621	downstream	40288	1	ENSMUSG00000031217	Efnb1	protein_coding	1.67295e-06
aggregated_scATAC_peak_85442	chrX	99204328	99204823	NA	NA	0,1	NA	NA	NA	1.78177e-05
aggregated_scATAC_peak_85458	chrX	99408787	99409236	downstream	9883	1	ENSMUSG00000085053	Gm14809	lincRNA	7.23616e-09
aggregated_scATAC_peak_85473	chrX	99495370	99495811	upstream	24317	1	ENSMUSG00000034403	Pja1	protein_coding	3.60147e-05
aggregated_scATAC_peak_85485	chrX	99662456	99662797	downstream	25148	1	ENSMUSG00000082505	Gm14816	processed_pseudogene	2.50335e-06
aggregated_scATAC_peak_85549	chrX	102018822	102019217	upstream	5868	1	ENSMUSG00000098968	Gm27843	miRNA	4.28369e-08
aggregated_scATAC_peak_85707	chrX	114869736	114870450	downstream	12206	1	ENSMUSG00000081160	Gm14897	processed_pseudogene	3.42649e-06
aggregated_scATAC_peak_85909	chrX	143335960	143336333	NA	NA	0,1	NA	NA	NA	8.49686e-05

## Sheet: cluster2
peak_id	peak_chr	peak_start	peak_end	genomic_location	distance	query	gene_id	gene_name	gene_type	scABC_qvalue
aggregated_scATAC_peak_34	chr1	5109293	5109879	upstream	39301	1	ENSMUSG00000002459	Rgs20	protein_coding	2.50945e-05
aggregated_scATAC_peak_95	chr1	9931921	9932213	downstream	10482	1	ENSMUSG00000093178	Snord87	snoRNA	5.45429e-06
aggregated_scATAC_peak_179	chr1	13314094	13314469	upstream	15375	1	ENSMUSG00000104170	Gm37702	TEC	6.83225e-05
aggregated_scATAC_peak_189	chr1	13641109	13641309	downstream	1539	0	ENSMUSG00000102982	Gm38319	TEC	1.0925e-07
aggregated_scATAC_peak_288	chr1	19893412	19893622	NA	NA	0,1	NA	NA	NA	1.99537e-05
aggregated_scATAC_peak_392	chr1	31094775	31095330	PeakInsideFeature	1402	0	ENSMUSG00000100371	Gm29669	lincRNA	3.09724e-05
aggregated_scATAC_peak_489	chr1	35630598	35631555	PeakInsideFeature	20221	1	ENSMUSG00000104417	Gm37068	lincRNA	6.43896e-05
aggregated_scATAC_peak_491	chr1	35717766	35717988	upstream	43725	1	ENSMUSG00000064601	Gm25634	snRNA	4.45575e-05
aggregated_scATAC_peak_508	chr1	36013752	36014117	downstream	2862	0	ENSMUSG00000104201	4930535G08Rik	lincRNA	2.32222e-05
aggregated_scATAC_peak_523	chr1	36249781	36250402	upstream	5372	1	ENSMUSG00000037470	Uggt1	protein_coding	1.26893e-06
aggregated_scATAC_peak_537	chr1	36465706	36466214	upstream	5660	1	ENSMUSG00000037408	Cnnm4	protein_coding	2.48863e-06
aggregated_scATAC_peak_551	chr1	36625458	36626014	downstream	23934	1	ENSMUSG00000089906	Gm6428	processed_pseudogene	1.02314e-06
aggregated_scATAC_peak_588	chr1	37517596	37518276	PeakInsideFeature	23080	1	ENSMUSG00000026110	Mgat4a	protein_coding	3.13245e-05
aggregated_scATAC_peak_597	chr1	37694394	37694960	overlapEnd	1987	0	ENSMUSG00000102650	Gm19863	TEC	2.78639e-06
aggregated_scATAC_peak_646	chr1	38642495	38642968	PeakInsideFeature	22223	1	ENSMUSG00000037138	Aff3	protein_coding	3.55287e-05
aggregated_scATAC_peak_674	chr1	39213003	39213343	PeakInsideFeature	19442	1	ENSMUSG00000026077	Npas2	protein_coding	5.35356e-05
aggregated_scATAC_peak_700	chr1	39593865	39594174	downstream	3985	1	ENSMUSG00000102471	Gm5100	processed_pseudogene	1.04276e-05
aggregated_scATAC_peak_722	chr1	39831405	39831930	downstream	15666	1	ENSMUSG00000101634	1700066B17Rik	lincRNA	3.60376e-09
aggregated_scATAC_peak_723	chr1	39832046	39832255	downstream	15184	1	ENSMUSG00000101634	1700066B17Rik	lincRNA	5.444e-08
aggregated_scATAC_peak_759	chr1	40764717	40765330	upstream	6361	1	ENSMUSG00000103270	Gm37915	antisense_RNA	3.16335e-05
aggregated_scATAC_peak_887	chr1	51331677	51331984	PeakInsideFeature	1949	0	ENSMUSG00000101799	9330175M20Rik	antisense_RNA	2.81536e-07
aggregated_scATAC_peak_909	chr1	51720238	51720581	PeakInsideFeature	26533	1	ENSMUSG00000101741	Gm28055	lincRNA	5.29184e-06
aggregated_scATAC_peak_915	chr1	51857061	51857314	upstream	8070	1	ENSMUSG00000101724	Gm29453	sense_intronic	7.89954e-05
aggregated_scATAC_peak_922	chr1	51996637	51997205	PeakInsideFeature	9773	1	ENSMUSG00000062939	Stat4	protein_coding	2.58189e-06
aggregated_scATAC_peak_951	chr1	52952513	52953469	NA	NA	0,1	NA	NA	NA	8.75332e-05
aggregated_scATAC_peak_1004	chr1	55213349	55214021	upstream	12566	1	ENSMUSG00000097649	Gm10561	antisense_RNA	6.65172e-06
aggregated_scATAC_peak_1021	chr1	56898488	56899377	NA	NA	0,1	NA	NA	NA	1.81068e-09
aggregated_scATAC_peak_1027	chr1	57201568	57201978	PeakInsideFeature	13220	1	ENSMUSG00000101429	BC055402	lincRNA	9.50776e-11
aggregated_scATAC_peak_1030	chr1	57336553	57336753	downstream	40891	1	ENSMUSG00000097519	4930558J18Rik	lincRNA	3.50279e-05
aggregated_scATAC_peak_1044	chr1	57742292	57742566	upstream	31733	1	ENSMUSG00000038305	Spats2l	protein_coding	8.1515e-06
aggregated_scATAC_peak_1154	chr1	59744756	59745507	upstream	18268	1	ENSMUSG00000067336	Bmpr2	protein_coding	2.58322e-07
aggregated_scATAC_peak_1173	chr1	60492460	60492707	downstream	30482	1	ENSMUSG00000081562	Gm11575	processed_pseudogene	2.18091e-05
aggregated_scATAC_peak_1196	chr1	61071172	61072008	upstream	4084	0	ENSMUSG00000082804	Rpl17-ps1	processed_pseudogene	6.36837e-06
aggregated_scATAC_peak_1215	chr1	61397990	61398205	downstream	19666	1	ENSMUSG00000085447	9530026F06Rik	lincRNA	1.29258e-07
aggregated_scATAC_peak_1220	chr1	61651359	61652302	upstream	2593	0	ENSMUSG00000103656	Gm37205	TEC	1.14245e-05
aggregated_scATAC_peak_1225	chr1	62048186	62049033	downstream	46729	1	ENSMUSG00000101509	Gm29641	processed_pseudogene	4.94903e-06
aggregated_scATAC_peak_1226	chr1	62071273	62071516	downstream	23945	1	ENSMUSG00000101509	Gm29641	processed_pseudogene	6.62589e-09
aggregated_scATAC_peak_1227	chr1	62078849	62079328	downstream	16251	1	ENSMUSG00000101509	Gm29641	processed_pseudogene	8.4096e-05
aggregated_scATAC_peak_1284	chr1	63032888	63033171	downstream	324	0	ENSMUSG00000088953	Gm24942	snoRNA	8.77283e-05
aggregated_scATAC_peak_1318	chr1	63920488	63920876	PeakInsideFeature	2834	1	ENSMUSG00000082373	Gm13754	unitary_pseudogene	2.23795e-08
aggregated_scATAC_peak_1334	chr1	64106027	64106657	PeakInsideFeature	15940	1	ENSMUSG00000025959	Klf7	protein_coding	8.98192e-09
aggregated_scATAC_peak_1362	chr1	64787668	64788106	NA	NA	0,1	NA	NA	NA	4.23335e-06
aggregated_scATAC_peak_1363	chr1	64809079	64809608	NA	NA	0,1	NA	NA	NA	3.27572e-07
aggregated_scATAC_peak_1367	chr1	64859988	64860202	NA	NA	0,1	NA	NA	NA	1.16183e-05
aggregated_scATAC_peak_1370	chr1	64915700	64916025	upstream	18540	1	ENSMUSG00000097264	Rpl31-ps24	processed_pseudogene	7.23358e-05
aggregated_scATAC_peak_1465	chr1	71837097	71838160	downstream	8982	1	ENSMUSG00000102689	Gm37217	TEC	2.8054e-08
aggregated_scATAC_peak_1467	chr1	71886819	71887297	upstream	1054	0	ENSMUSG00000099707	Gm8883	lincRNA	2.03674e-05
aggregated_scATAC_peak_1481	chr1	72172860	72173938	PeakInsideFeature	38908	1	ENSMUSG00000039395	Mreg	protein_coding	5.90229e-07
aggregated_scATAC_peak_1485	chr1	72218616	72219572	upstream	6787	1	ENSMUSG00000039395	Mreg	protein_coding	1.7797e-08
aggregated_scATAC_peak_1494	chr1	72401742	72402009	NA	NA	0,1	NA	NA	NA	2.0921e-07
aggregated_scATAC_peak_1507	chr1	72755723	72756239	downstream	44691	1	ENSMUSG00000046330	Rpl37a	protein_coding	1.15822e-05
aggregated_scATAC_peak_1615	chr1	74200277	74200603	upstream	5809	1	ENSMUSG00000048480	Cxcr1	protein_coding	4.1891e-07
aggregated_scATAC_peak_1635	chr1	74431772	74432349	PeakInsideFeature	22684	1	ENSMUSG00000026175	Vil1	protein_coding	4.10249e-05
aggregated_scATAC_peak_1674	chr1	74900384	74901400	FeatureInsidePeak	171	0	ENSMUSG00000065616	Mir375	miRNA	1.77811e-09
aggregated_scATAC_peak_1682	chr1	74962483	74963038	downstream	8508	1	ENSMUSG00000103145	Gm37744	TEC	6.9903e-06
aggregated_scATAC_peak_1684	chr1	74971608	74972181	downstream	17642	1	ENSMUSG00000103145	Gm37744	TEC	8.38394e-05
aggregated_scATAC_peak_1718	chr1	75337024	75337225	upstream	19134	1	ENSMUSG00000026209	Dnpep	protein_coding	5.42591e-05
aggregated_scATAC_peak_1719	chr1	75337701	75338589	upstream	20155	1	ENSMUSG00000026209	Dnpep	protein_coding	4.69751e-09
aggregated_scATAC_peak_1745	chr1	75495996	75496486	PeakInsideFeature	10211	1	ENSMUSG00000026211	Obsl1	protein_coding	2.54176e-08
aggregated_scATAC_peak_1780	chr1	77175110	77175472	upstream	28299	1	ENSMUSG00000102904	Gm38265	TEC	3.48601e-05
aggregated_scATAC_peak_1790	chr1	77279665	77279909	NA	NA	0,1	NA	NA	NA	3.13203e-06
aggregated_scATAC_peak_1810	chr1	77541188	77541705	downstream	26166	1	ENSMUSG00000101849	Gm28386	lincRNA	6.23003e-05
aggregated_scATAC_peak_1813	chr1	77661842	77662107	NA	NA	0,1	NA	NA	NA	9.64297e-05
aggregated_scATAC_peak_1949	chr1	84278240	84278619	NA	NA	0,1	NA	NA	NA	1.22455e-05
aggregated_scATAC_peak_1996	chr1	86176047	86176325	PeakInsideFeature	21406	1	ENSMUSG00000062590	Armc9	protein_coding	7.69737e-07
aggregated_scATAC_peak_2002	chr1	86278001	86278886	PeakInsideFeature	22931	1	ENSMUSG00000087538	Gm16341	antisense_RNA	4.02025e-05
aggregated_scATAC_peak_2029	chr1	86498016	86498341	downstream	24519	1	ENSMUSG00000101328	Rpl30-ps6	processed_pseudogene	2.48361e-06
aggregated_scATAC_peak_2048	chr1	87035552	87036246	upstream	824	0	ENSMUSG00000103984	Gm37447	TEC	4.09513e-08
aggregated_scATAC_peak_2077	chr1	87394558	87394980	overlapStart	40	0	ENSMUSG00000079436	Kcnj13	protein_coding	6.62097e-05
aggregated_scATAC_peak_2137	chr1	88475292	88476072	upstream	13074	1	ENSMUSG00000099553	Gm29538	lincRNA	4.9523e-06
aggregated_scATAC_peak_2144	chr1	88583729	88584180	downstream	32437	1	ENSMUSG00000100798	Gm19589	lincRNA	9.43034e-07
aggregated_scATAC_peak_2169	chr1	88772146	88772462	downstream	17414	1	ENSMUSG00000097398	Platr5	lincRNA	4.19232e-06
aggregated_scATAC_peak_2174	chr1	88954802	88955099	downstream	22631	1	ENSMUSG00000101333	Gm4753	processed_pseudogene	5.9159e-07
aggregated_scATAC_peak_2371	chr1	91456598	91456879	PeakInsideFeature	2586	0	ENSMUSG00000055866	Per2	protein_coding	7.70854e-06
aggregated_scATAC_peak_2570	chr1	105178795	105179830	NA	NA	0,1	NA	NA	NA	1.56185e-05
aggregated_scATAC_peak_2572	chr1	105314194	105314445	upstream	6801	1	ENSMUSG00000099582	Gm29014	processed_pseudogene	3.62397e-08
aggregated_scATAC_peak_2619	chr1	106586901	106587172	downstream	19834	1	ENSMUSG00000103348	Gm37053	TEC	2.49308e-09
aggregated_scATAC_peak_2640	chr1	108592727	108593046	downstream	19628	1	ENSMUSG00000101231	Gm28283	processed_pseudogene	1.46507e-05
aggregated_scATAC_peak_2677	chr1	118672277	118672527	upstream	9419	1	ENSMUSG00000088363	Gm23497	snRNA	9.65432e-05
aggregated_scATAC_peak_2690	chr1	118877938	118878718	NA	NA	0,1	NA	NA	NA	1.3848e-05
aggregated_scATAC_peak_2699	chr1	118994636	118994845	downstream	40520	1	ENSMUSG00000098273	Mir6346	miRNA	4.04132e-06
aggregated_scATAC_peak_2842	chr1	125550416	125550633	upstream	10071	1	ENSMUSG00000026342	Slc35f5	protein_coding	7.9315e-08
aggregated_scATAC_peak_2896	chr1	127531195	127531836	NA	NA	0,1	NA	NA	NA	3.90453e-07
aggregated_scATAC_peak_2957	chr1	129124364	129124610	NA	NA	0,1	NA	NA	NA	2.38734e-12
aggregated_scATAC_peak_2978	chr1	130822004	130822566	PeakInsideFeature	1799	0	ENSMUSG00000086706	Gm15848	antisense_RNA	5.64553e-05
aggregated_scATAC_peak_3178	chr1	133265286	133265787	PeakInsideFeature	4272	0	ENSMUSG00000101693	Gm19461	antisense_RNA	8.40625e-08
aggregated_scATAC_peak_3182	chr1	133309618	133310193	overlapStart	79	0	ENSMUSG00000098306	Gm28040	protein_coding	2.97058e-08
aggregated_scATAC_peak_3204	chr1	133452491	133452917	upstream	28327	1	ENSMUSG00000070643	Sox13	protein_coding	9.30453e-05
aggregated_scATAC_peak_3265	chr1	134070161	134070554	downstream	8762	1	ENSMUSG00000020423	Btg2	protein_coding	7.5494e-07
aggregated_scATAC_peak_3312	chr1	134609129	134610113	downstream	36899	1	ENSMUSG00000097435	Gm26783	lincRNA	5.92759e-05
aggregated_scATAC_peak_3331	chr1	134763941	134764407	downstream	37811	1	ENSMUSG00000103614	Gm37949	TEC	3.17714e-05
aggregated_scATAC_peak_3347	chr1	135076456	135077017	PeakInsideFeature	28540	1	ENSMUSG00000042793	Lgr6	protein_coding	2.27639e-07
aggregated_scATAC_peak_3367	chr1	135248320	135248886	overlapStart	42	0	ENSMUSG00000097680	Gm26642	antisense_RNA	4.35884e-06
aggregated_scATAC_peak_3385	chr1	135515372	135515709	downstream	9798	1	ENSMUSG00000104524	Gm37333	TEC	8.21795e-06
aggregated_scATAC_peak_3440	chr1	135810213	135810433	upstream	8275	1	ENSMUSG00000041782	Lad1	protein_coding	1.87537e-05
aggregated_scATAC_peak_3542	chr1	136960412	136960928	overlapStart	222	0	ENSMUSG00000026398	Nr5a2	protein_coding	6.32063e-07
aggregated_scATAC_peak_3544	chr1	136991847	136992464	upstream	1886	0	ENSMUSG00000088970	Gm23763	snRNA	1.20288e-09
aggregated_scATAC_peak_3546	chr1	137141413	137141626	NA	NA	0,1	NA	NA	NA	5.52352e-05
aggregated_scATAC_peak_3547	chr1	137142078	137142565	NA	NA	0,1	NA	NA	NA	2.94081e-07
aggregated_scATAC_peak_3624	chr1	150476053	150476903	upstream	10313	1	ENSMUSG00000006014	Prg4	protein_coding	2.56244e-06
aggregated_scATAC_peak_3626	chr1	150544922	150545288	upstream	4212	0	ENSMUSG00000101519	Ska2l-ps	processed_pseudogene	8.06374e-06
aggregated_scATAC_peak_3718	chr1	152788024	152788655	upstream	11854	1	ENSMUSG00000026480	Ncf2	protein_coding	4.75087e-05
aggregated_scATAC_peak_3758	chr1	153185678	153186507	overlapStart	355	0	ENSMUSG00000026479	Lamc2	protein_coding	5.09447e-07
aggregated_scATAC_peak_3839	chr1	155013767	155014150	upstream	17781	1	ENSMUSG00000101433	Gm29441	processed_pseudogene	1.32873e-05
aggregated_scATAC_peak_3875	chr1	155438403	155439121	upstream	21347	1	ENSMUSG00000026469	Xpr1	protein_coding	1.57816e-05
aggregated_scATAC_peak_3916	chr1	156096809	156097054	NA	NA	0,1	NA	NA	NA	3.74651e-07
aggregated_scATAC_peak_3931	chr1	156470502	156470906	PeakInsideFeature	3627	0	ENSMUSG00000026600	Soat1	protein_coding	3.4452e-05
aggregated_scATAC_peak_4072	chr1	161388914	161389299	upstream	6303	1	ENSMUSG00000026700	Tnfsf4	protein_coding	3.75165e-05
aggregated_scATAC_peak_4122	chr1	162700389	162700975	upstream	26462	1	ENSMUSG00000098259	Gm27616	miRNA	4.60347e-09
aggregated_scATAC_peak_4246	chr1	166347981	166348181	upstream	31016	1	ENSMUSG00000026563	Tada1	protein_coding	7.02311e-05
aggregated_scATAC_peak_4480	chr1	171435339	171435729	PeakInsideFeature	1784	0	ENSMUSG00000097045	Gm26641	lincRNA	3.79752e-05
aggregated_scATAC_peak_4492	chr1	171715807	171716566	downstream	5098	1	ENSMUSG00000059058	Tma7-ps	processed_pseudogene	5.8635e-06
aggregated_scATAC_peak_4508	chr1	172063360	172063971	upstream	6093	1	ENSMUSG00000051251	Nhlh1	protein_coding	7.01782e-05
aggregated_scATAC_peak_4622	chr1	177110874	177111245	downstream	24393	1	ENSMUSG00000103163	Gm38146	TEC	6.35924e-06
aggregated_scATAC_peak_4662	chr1	178571011	178571324	PeakInsideFeature	42043	1	ENSMUSG00000026494	Kif26b	protein_coding	2.11178e-07
aggregated_scATAC_peak_4666	chr1	178638923	178640279	downstream	2696	1	ENSMUSG00000064967	Gm24405	snRNA	2.88052e-08
aggregated_scATAC_peak_4672	chr1	178707793	178708354	upstream	47734	1	ENSMUSG00000102922	Gm34176	processed_pseudogene	1.24561e-09
aggregated_scATAC_peak_4701	chr1	179477115	179477559	PeakInsideFeature	40704	1	ENSMUSG00000055067	Smyd3	protein_coding	1.78395e-05
aggregated_scATAC_peak_4708	chr1	179586245	179586663	PeakInsideFeature	40084	1	ENSMUSG00000038949	Cnst	protein_coding	2.39104e-10
aggregated_scATAC_peak_4810	chr1	180952173	180952917	PeakInsideFeature	5604	1	ENSMUSG00000085563	2210411M09Rik	antisense_RNA	7.4151e-07
aggregated_scATAC_peak_4850	chr1	181623099	181623924	PeakInsideFeature	46953	1	ENSMUSG00000047369	Dnah14	protein_coding	2.39894e-05
aggregated_scATAC_peak_4903	chr1	182479004	182479354	NA	NA	0	NA	NA	NA	4.10123e-07
aggregated_scATAC_peak_4912	chr1	182535128	182535469	upstream	10952	1	ENSMUSG00000103878	Gm8197	transcribed_processed_pseudogene	2.95378e-13
aggregated_scATAC_peak_4971	chr1	183363177	183363530	PeakInsideFeature	6199	1	ENSMUSG00000056050	Mia3	protein_coding	7.44919e-05
aggregated_scATAC_peak_4987	chr1	184140524	184140958	NA	NA	0,1	NA	NA	NA	2.46892e-07
aggregated_scATAC_peak_4998	chr1	184663350	184664270	upstream	31224	1	ENSMUSG00000103314	Gm38358	processed_pseudogene	5.99941e-07
aggregated_scATAC_peak_5049	chr1	185209588	185210257	PeakInsideFeature	5805	1	ENSMUSG00000039318	Rab3gap2	protein_coding	5.04839e-07
aggregated_scATAC_peak_5127	chr1	187823231	187823789	NA	NA	0,1	NA	NA	NA	3.21663e-05
aggregated_scATAC_peak_5130	chr1	187854226	187854544	NA	NA	0,1	NA	NA	NA	4.0074e-07
aggregated_scATAC_peak_5133	chr1	187901935	187902502	NA	NA	0,1	NA	NA	NA	8.41001e-06
aggregated_scATAC_peak_5141	chr1	188017344	188017906	upstream	8635	1	ENSMUSG00000103577	9330162B11Rik	antisense_RNA	5.08059e-07
aggregated_scATAC_peak_5183	chr1	189402443	189403427	upstream	662	0	ENSMUSG00000037624	Kcnk2	protein_coding	3.78735e-05
aggregated_scATAC_peak_5206	chr1	189761342	189762056	PeakInsideFeature	33431	1	ENSMUSG00000026604	Ptpn14	protein_coding	2.0427e-09
aggregated_scATAC_peak_5217	chr1	189875111	189875890	upstream	4435	0	ENSMUSG00000104435	Gm37422	antisense_RNA	2.51199e-07
aggregated_scATAC_peak_5234	chr1	190106671	190107438	NA	NA	0,1	NA	NA	NA	5.2344e-05
aggregated_scATAC_peak_5345	chr1	191738726	191739099	PeakInsideFeature	21078	1	ENSMUSG00000026623	Lpgat1	protein_coding	4.56338e-08
aggregated_scATAC_peak_5413	chr1	193131239	193131904	upstream	1300	0	ENSMUSG00000016181	Diexf	protein_coding	8.92372e-08
aggregated_scATAC_peak_5472	chr1	194354349	194355188	NA	NA	0,1	NA	NA	NA	1.57678e-06
aggregated_scATAC_peak_42327	chr2	3134716	3135261	PeakInsideFeature	20764	1	ENSMUSG00000050530	Fam171a1	protein_coding	1.18955e-05
aggregated_scATAC_peak_42330	chr2	3180393	3180882	NA	NA	0,1	NA	NA	NA	4.51934e-06
aggregated_scATAC_peak_42353	chr2	3822348	3822559	upstream	32576	1	ENSMUSG00000085656	Gm13180	lincRNA	2.3346e-08
aggregated_scATAC_peak_42441	chr2	5407545	5407828	NA	NA	0,1	NA	NA	NA	3.25443e-06
aggregated_scATAC_peak_42450	chr2	5732166	5732563	upstream	17849	1	ENSMUSG00000039145	Camk1d	protein_coding	1.50135e-11
aggregated_scATAC_peak_42482	chr2	6378706	6379241	NA	NA	0,1	NA	NA	NA	1.22764e-05
aggregated_scATAC_peak_42513	chr2	9516090	9517165	NA	NA	0,1	NA	NA	NA	1.06974e-05
aggregated_scATAC_peak_42520	chr2	9754124	9754514	NA	NA	0,1	NA	NA	NA	1.83325e-08
aggregated_scATAC_peak_42636	chr2	13479229	13479465	PeakInsideFeature	12466	1	ENSMUSG00000026726	Cubn	protein_coding	6.13285e-07
aggregated_scATAC_peak_42646	chr2	13682454	13682787	downstream	10104	1	ENSMUSG00000104354	Gm37126	antisense_RNA	3.27461e-05
aggregated_scATAC_peak_42675	chr2	15745059	15745465	NA	NA	0,1	NA	NA	NA	1.11429e-05
aggregated_scATAC_peak_42762	chr2	18892222	18892476	NA	NA	0,1	NA	NA	NA	6.50447e-05
aggregated_scATAC_peak_43051	chr2	26482004	26482660	upstream	12213	1	ENSMUSG00000098548	Mir6996	miRNA	3.43742e-09
aggregated_scATAC_peak_43092	chr2	26971944	26972207	upstream	1340	0	ENSMUSG00000014852	Adamts13	protein_coding	1.04035e-06
aggregated_scATAC_peak_43101	chr2	27048694	27049575	downstream	11849	1	ENSMUSG00000087364	Gm13398	antisense_RNA	9.33339e-07
aggregated_scATAC_peak_43131	chr2	27361717	27362404	downstream	35356	1	ENSMUSG00000086669	AA645442	antisense_RNA	4.60436e-06
aggregated_scATAC_peak_43132	chr2	27363682	27364079	downstream	37176	1	ENSMUSG00000086669	AA645442	antisense_RNA	1.1116e-06
aggregated_scATAC_peak_43144	chr2	27416398	27416598	PeakInsideFeature	10535	1	ENSMUSG00000009621	Vav2	protein_coding	1.94521e-09
aggregated_scATAC_peak_43157	chr2	27591766	27591966	NA	NA	0,1	NA	NA	NA	1.45056e-06
aggregated_scATAC_peak_43159	chr2	27624762	27625493	NA	NA	0,1	NA	NA	NA	2.7054e-06
aggregated_scATAC_peak_43160	chr2	27633911	27634668	upstream	42150	1	ENSMUSG00000015846	Rxra	protein_coding	4.45962e-05
aggregated_scATAC_peak_43182	chr2	27772802	27773423	NA	NA	0,1	NA	NA	NA	6.80964e-07
aggregated_scATAC_peak_43255	chr2	28629994	28630471	upstream	8250	1	ENSMUSG00000026815	Gfi1b	protein_coding	5.61145e-08
aggregated_scATAC_peak_43286	chr2	28966116	28966321	upstream	31609	1	ENSMUSG00000083773	Gm13394	processed_pseudogene	1.53295e-05
aggregated_scATAC_peak_43287	chr2	28966412	28966751	upstream	31973	1	ENSMUSG00000083773	Gm13394	processed_pseudogene	9.61832e-07
aggregated_scATAC_peak_43544	chr2	31417133	31417615	NA	NA	0,1	NA	NA	NA	5.3079e-05
aggregated_scATAC_peak_43571	chr2	31662853	31663320	downstream	2616	1	ENSMUSG00000083143	Gm13424	processed_pseudogene	3.12475e-07
aggregated_scATAC_peak_43598	chr2	31892899	31893140	upstream	603	0	ENSMUSG00000086356	Gm13441	antisense_RNA	8.55453e-06
aggregated_scATAC_peak_43673	chr2	32524830	32525151	overlapStart	41	0	ENSMUSG00000085017	Gm13412	lincRNA	1.81502e-05
aggregated_scATAC_peak_43766	chr2	33205792	33206549	downstream	5771	1	ENSMUSG00000088836	Gm23546	snoRNA	1.9584e-06
aggregated_scATAC_peak_43774	chr2	33305003	33305212	upstream	18063	1	ENSMUSG00000082844	Gm13537	processed_pseudogene	5.53855e-05
aggregated_scATAC_peak_43804	chr2	33615839	33616862	downstream	1952	0	ENSMUSG00000104403	Gm38011	TEC	5.75102e-06
aggregated_scATAC_peak_43858	chr2	34235599	34236143	NA	NA	0,1	NA	NA	NA	2.84743e-05
aggregated_scATAC_peak_44015	chr2	37746603	37746807	upstream	29544	1	ENSMUSG00000035403	Crb2	protein_coding	1.75032e-07
aggregated_scATAC_peak_44102	chr2	38881133	38881577	downstream	19192	1	ENSMUSG00000107468	5730507A11Rik	TEC	1.11952e-06
aggregated_scATAC_peak_44184	chr2	48567918	48568309	NA	NA	0,1	NA	NA	NA	2.67011e-05
aggregated_scATAC_peak_44196	chr2	49338700	49339383	upstream	10891	1	ENSMUSG00000084177	Gm13508	processed_pseudogene	7.48872e-06
aggregated_scATAC_peak_44228	chr2	49811364	49812079	PeakInsideFeature	1226	0	ENSMUSG00000085357	Gm13480	lincRNA	8.57714e-05
aggregated_scATAC_peak_44229	chr2	49815591	49816196	upstream	2946	0	ENSMUSG00000085357	Gm13480	lincRNA	2.08826e-06
aggregated_scATAC_peak_44248	chr2	50186700	50187404	NA	NA	0,1	NA	NA	NA	4.93934e-09
aggregated_scATAC_peak_44255	chr2	50419568	50420022	downstream	10463	1	ENSMUSG00000082483	Gm13486	processed_pseudogene	2.98398e-07
aggregated_scATAC_peak_44387	chr2	57454257	57454649	upstream	28744	1	ENSMUSG00000084338	Gm13531	processed_pseudogene	2.84565e-06
aggregated_scATAC_peak_44452	chr2	59599728	59600468	upstream	11944	1	ENSMUSG00000035168	Tanc1	protein_coding	3.18409e-06
aggregated_scATAC_peak_44455	chr2	59637050	59637765	PeakInsideFeature	25366	1	ENSMUSG00000035168	Tanc1	protein_coding	1.11312e-07
aggregated_scATAC_peak_44575	chr2	63280987	63281313	NA	NA	0,1	NA	NA	NA	4.85691e-07
aggregated_scATAC_peak_44603	chr2	65219788	65220128	upstream	18798	1	ENSMUSG00000086881	Gm13594	antisense_RNA	1.16108e-06
aggregated_scATAC_peak_44670	chr2	68732233	68732790	NA	NA	0,1	NA	NA	NA	7.77358e-06
aggregated_scATAC_peak_44689	chr2	69239232	69239691	upstream	8845	1	ENSMUSG00000086819	Gm13613	antisense_RNA	2.6509e-05
aggregated_scATAC_peak_44693	chr2	69385955	69386848	PeakInsideFeature	5957	1	ENSMUSG00000027068	Dhrs9	protein_coding	1.8606e-05
aggregated_scATAC_peak_44694	chr2	69395657	69396079	PeakInsideFeature	15423	1	ENSMUSG00000027068	Dhrs9	protein_coding	1.17256e-06
aggregated_scATAC_peak_44824	chr2	71697511	71698175	upstream	21574	1	ENSMUSG00000064263	Platr26	lincRNA	2.57448e-08
aggregated_scATAC_peak_44881	chr2	72507101	72507416	downstream	31099	1	ENSMUSG00000055612	Cdca7	protein_coding	4.80793e-05
aggregated_scATAC_peak_44890	chr2	72793432	72793890	PeakInsideFeature	20056	1	ENSMUSG00000085427	6430710C18Rik	lincRNA	2.1904e-05
aggregated_scATAC_peak_44891	chr2	72838149	72838800	upstream	24757	1	ENSMUSG00000085427	6430710C18Rik	lincRNA	5.90986e-07
aggregated_scATAC_peak_44924	chr2	73450083	73450789	upstream	9269	1	ENSMUSG00000086069	Gm13708	lincRNA	3.36298e-06
aggregated_scATAC_peak_44950	chr2	73798642	73799232	upstream	10225	1	ENSMUSG00000081062	Gm13640	processed_pseudogene	1.53738e-07
aggregated_scATAC_peak_44964	chr2	74257105	74258250	NA	NA	0,1	NA	NA	NA	4.22236e-10
aggregated_scATAC_peak_44991	chr2	74720989	74721498	upstream	4826	0	ENSMUSG00000065500	Mir10b	miRNA	1.50435e-06
aggregated_scATAC_peak_45040	chr2	75327647	75328493	downstream	20635	1	ENSMUSG00000102473	Gm37243	TEC	2.64051e-08
aggregated_scATAC_peak_45050	chr2	75534281	75534559	NA	NA	0,1	NA	NA	NA	7.69111e-06
aggregated_scATAC_peak_45125	chr2	76435720	76435960	PeakInsideFeature	29332	1	ENSMUSG00000042359	Osbpl6	protein_coding	4.27716e-06
aggregated_scATAC_peak_45188	chr2	78788090	78788600	NA	NA	0,1	NA	NA	NA	3.25924e-06
aggregated_scATAC_peak_45198	chr2	79379153	79379980	downstream	19701	1	ENSMUSG00000081284	Gm13673	processed_pseudogene	7.55861e-06
aggregated_scATAC_peak_45424	chr2	91832158	91832581	NA	NA	0,1	NA	NA	NA	8.51771e-06
aggregated_scATAC_peak_45475	chr2	92440554	92440836	upstream	6652	1	ENSMUSG00000068742	Cry2	protein_coding	8.53975e-06
aggregated_scATAC_peak_45504	chr2	92841746	92841967	downstream	31453	1	ENSMUSG00000082700	Gm13792	processed_pseudogene	2.52562e-07
aggregated_scATAC_peak_45532	chr2	93154555	93154812	upstream	32864	1	ENSMUSG00000068735	Trp53i11	protein_coding	8.88707e-05
aggregated_scATAC_peak_45545	chr2	93257642	93258126	NA	NA	0,1	NA	NA	NA	1.53652e-12
aggregated_scATAC_peak_45555	chr2	93339656	93340124	upstream	5385	1	ENSMUSG00000027217	Tspan18	protein_coding	1.23396e-06
aggregated_scATAC_peak_45565	chr2	93412017	93412494	PeakInsideFeature	8709	1	ENSMUSG00000085852	Gm13807	antisense_RNA	2.94611e-07
aggregated_scATAC_peak_45603	chr2	93770630	93770931	upstream	23790	1	ENSMUSG00000081353	Gm13818	processed_pseudogene	2.13634e-05
aggregated_scATAC_peak_45652	chr2	94583510	94583779	downstream	7777	1	ENSMUSG00000083204	Gm13788	processed_pseudogene	1.04048e-07
aggregated_scATAC_peak_45713	chr2	102212139	102212719	upstream	2050	0	ENSMUSG00000081774	Gm13866	processed_pseudogene	4.28435e-05
aggregated_scATAC_peak_45741	chr2	102815275	102815728	NA	NA	0,1	NA	NA	NA	5.45883e-06
aggregated_scATAC_peak_45755	chr2	103144447	103144784	upstream	33171	1	ENSMUSG00000087032	Gm13874	lincRNA	2.56339e-07
aggregated_scATAC_peak_45759	chr2	103285542	103285931	PeakInsideFeature	17542	1	ENSMUSG00000012350	Ehf	protein_coding	1.72553e-06
aggregated_scATAC_peak_45828	chr2	104267029	104267353	PeakInsideFeature	10519	1	ENSMUSG00000087473	Gm13883	antisense_RNA	1.13845e-05
aggregated_scATAC_peak_45855	chr2	105035662	105036046	upstream	3567	0	ENSMUSG00000083487	Gm13888	processed_pseudogene	4.5035e-05
aggregated_scATAC_peak_45903	chr2	105791066	105791331	NA	NA	0,1	NA	NA	NA	2.56929e-05
aggregated_scATAC_peak_45932	chr2	106866278	106866662	NA	NA	0,1	NA	NA	NA	9.8441e-05
aggregated_scATAC_peak_45971	chr2	110167394	110167748	upstream	29318	1	ENSMUSG00000085444	Gm13936	antisense_RNA	4.86711e-06
aggregated_scATAC_peak_45977	chr2	110191801	110193022	upstream	4477	0	ENSMUSG00000085444	Gm13936	antisense_RNA	8.36467e-09
aggregated_scATAC_peak_45984	chr2	110331773	110332407	upstream	17530	1	ENSMUSG00000041660	Bbox1	protein_coding	2.81654e-05
aggregated_scATAC_peak_46054	chr2	114632367	114632831	upstream	21826	1	ENSMUSG00000084785	Gm13972	processed_transcript	1.59007e-05
aggregated_scATAC_peak_46089	chr2	115943022	115943420	NA	NA	0,1	NA	NA	NA	1.17624e-07
aggregated_scATAC_peak_46270	chr2	119329175	119329434	upstream	3110	0	ENSMUSG00000074912	Gm14207	processed_transcript	3.69868e-09
aggregated_scATAC_peak_46438	chr2	124163607	124163988	upstream	33842	1	ENSMUSG00000085496	4930517E11Rik	lincRNA	1.06174e-11
aggregated_scATAC_peak_46586	chr2	128257762	128257971	upstream	18223	1	ENSMUSG00000086879	Gm14012	lincRNA	2.16232e-11
aggregated_scATAC_peak_46668	chr2	129606301	129606576	PeakInsideFeature	13603	1	ENSMUSG00000037902	Sirpa	protein_coding	1.04525e-06
aggregated_scATAC_peak_46684	chr2	129994538	129994742	upstream	17709	1	ENSMUSG00000027401	Tgm3	protein_coding	4.93171e-11
aggregated_scATAC_peak_46686	chr2	130076205	130076425	downstream	4591	1	ENSMUSG00000089152	Gm22424	snoRNA	1.37087e-07
aggregated_scATAC_peak_46836	chr2	132922131	132922832	PeakInsideFeature	23424	1	ENSMUSG00000027356	Fermt1	protein_coding	2.18976e-09
aggregated_scATAC_peak_46859	chr2	133419709	133420272	upstream	12105	1	ENSMUSG00000086650	A430048G15Rik	lincRNA	1.06746e-05
aggregated_scATAC_peak_46873	chr2	133617397	133618061	upstream	33308	1	ENSMUSG00000064983	Gm25258	snRNA	1.27131e-06
aggregated_scATAC_peak_46942	chr2	137098797	137099027	PeakInsideFeature	17732	1	ENSMUSG00000027276	Jag1	protein_coding	5.44491e-05
aggregated_scATAC_peak_47022	chr2	141289183	141289975	upstream	2588	0	ENSMUSG00000086450	Macrod2os1	antisense_RNA	1.35635e-07
aggregated_scATAC_peak_47092	chr2	144308618	144308949	upstream	22675	1	ENSMUSG00000084837	1700108N11Rik	antisense_RNA	6.03558e-06
aggregated_scATAC_peak_47118	chr2	145219817	145220220	NA	NA	0,1	NA	NA	NA	1.08847e-05
aggregated_scATAC_peak_47140	chr2	145787529	145788038	PeakInsideFeature	3050	1	ENSMUSG00000001768	Rin2	protein_coding	1.48091e-06
aggregated_scATAC_peak_47213	chr2	147231080	147231496	downstream	19497	1	ENSMUSG00000089316	Gm22261	misc_RNA	6.75237e-06
aggregated_scATAC_peak_47229	chr2	147748431	147748680	downstream	37863	1	ENSMUSG00000051986	A530006G24Rik	lincRNA	8.49394e-07
aggregated_scATAC_peak_47237	chr2	147875954	147876484	upstream	1341	0	ENSMUSG00000065791	Gm25516	snRNA	1.1027e-06
aggregated_scATAC_peak_47243	chr2	147934686	147935264	NA	NA	0,1	NA	NA	NA	6.55722e-05
aggregated_scATAC_peak_47246	chr2	147968176	147968391	NA	NA	0,1	NA	NA	NA	9.19018e-05
aggregated_scATAC_peak_47250	chr2	147984591	147985575	NA	NA	0,1	NA	NA	NA	3.35693e-08
aggregated_scATAC_peak_47252	chr2	148004958	148005727	PeakInsideFeature	34861	1	ENSMUSG00000086141	9030622O22Rik	lincRNA	5.97965e-08
aggregated_scATAC_peak_47294	chr2	148835879	148836626	PeakInsideFeature	1105	0	ENSMUSG00000027445	Cst9	protein_coding	6.36023e-06
aggregated_scATAC_peak_47331	chr2	150924882	150925125	upstream	8529	1	ENSMUSG00000082341	Gm14143	processed_pseudogene	2.72656e-05
aggregated_scATAC_peak_47429	chr2	152675177	152675655	PeakInsideFeature	5955	1	ENSMUSG00000019188	H13	protein_coding	3.73799e-09
aggregated_scATAC_peak_47437	chr2	152725268	152725588	upstream	10823	1	ENSMUSG00000042745	Id1	protein_coding	2.15719e-06
aggregated_scATAC_peak_47579	chr2	154734960	154735160	PeakInsideFeature	3391	0	ENSMUSG00000085691	Gm14216	lincRNA	2.58118e-05
aggregated_scATAC_peak_47590	chr2	154937645	154937845	upstream	44810	1	ENSMUSG00000074656	Eif2s2	protein_coding	2.55366e-05
aggregated_scATAC_peak_47729	chr2	157145220	157145793	upstream	10241	1	ENSMUSG00000027639	Samhd1	protein_coding	2.65524e-05
aggregated_scATAC_peak_47749	chr2	157422768	157423386	PeakInsideFeature	4633	1	ENSMUSG00000027646	Src	protein_coding	2.25355e-06
aggregated_scATAC_peak_47782	chr2	157648743	157649296	NA	NA	0,1	NA	NA	NA	7.83817e-06
aggregated_scATAC_peak_47833	chr2	158215193	158215593	PeakInsideFeature	13829	1	ENSMUSG00000037813	D630003M21Rik	protein_coding	1.64417e-08
aggregated_scATAC_peak_47835	chr2	158230448	158230916	upstream	1460	0	ENSMUSG00000037813	D630003M21Rik	protein_coding	2.67977e-06
aggregated_scATAC_peak_47894	chr2	158898444	158899196	NA	NA	0,1	NA	NA	NA	2.27643e-06
aggregated_scATAC_peak_47910	chr2	159446537	159446785	downstream	9796	1	ENSMUSG00000083913	Gm14219	processed_pseudogene	9.26735e-07
aggregated_scATAC_peak_47920	chr2	159763047	159763566	downstream	14901	1	ENSMUSG00000083451	Gm11445	processed_pseudogene	3.34894e-05
aggregated_scATAC_peak_47925	chr2	160131488	160132077	NA	NA	0,1	NA	NA	NA	5.97047e-05
aggregated_scATAC_peak_47936	chr2	160383436	160383943	upstream	16625	1	ENSMUSG00000074622	Mafb	protein_coding	6.80957e-08
aggregated_scATAC_peak_47945	chr2	160542093	160542355	upstream	41133	1	ENSMUSG00000078955	Gm14222	sense_intronic	5.15146e-08
aggregated_scATAC_peak_47981	chr2	161280926	161281438	upstream	6038	1	ENSMUSG00000081151	Gm11448	processed_pseudogene	8.74488e-05
aggregated_scATAC_peak_47982	chr2	161332608	161332988	downstream	1484	0	ENSMUSG00000087031	Gm14241	lincRNA	4.44466e-06
aggregated_scATAC_peak_47991	chr2	161545924	161546487	upstream	32194	1	ENSMUSG00000100943	Gm29229	processed_transcript	2.23978e-06
aggregated_scATAC_peak_48041	chr2	163288820	163289531	NA	NA	0,1	NA	NA	NA	4.39387e-07
aggregated_scATAC_peak_48060	chr2	163481504	163482337	upstream	9291	1	ENSMUSG00000048486	Fitm2	protein_coding	9.20799e-05
aggregated_scATAC_peak_48067	chr2	163546721	163547261	upstream	5271	1	ENSMUSG00000046840	Hnf4aos	antisense_RNA	1.44446e-05
aggregated_scATAC_peak_48068	chr2	163552558	163552901	upstream	11010	1	ENSMUSG00000046840	Hnf4aos	antisense_RNA	9.28483e-08
aggregated_scATAC_peak_48069	chr2	163555376	163555824	upstream	13880	1	ENSMUSG00000046840	Hnf4aos	antisense_RNA	5.11334e-07
aggregated_scATAC_peak_48076	chr2	163637681	163638157	upstream	6931	1	ENSMUSG00000058812	0610039K10Rik	antisense_RNA	4.84576e-05
aggregated_scATAC_peak_48081	chr2	163691976	163692491	overlapStart	45	0	ENSMUSG00000087129	Gm16316	antisense_RNA	8.08175e-05
aggregated_scATAC_peak_48133	chr2	164438230	164438608	PeakInsideFeature	5468	1	ENSMUSG00000017009	Sdc4	protein_coding	7.45006e-05
aggregated_scATAC_peak_48143	chr2	164518897	164519309	downstream	21583	1	ENSMUSG00000017721	Pigt	protein_coding	2.79946e-07
aggregated_scATAC_peak_48259	chr2	165666966	165667503	upstream	377	0	ENSMUSG00000081758	Gm11460	processed_pseudogene	1.17899e-06
aggregated_scATAC_peak_48395	chr2	166870299	166870633	upstream	35574	1	ENSMUSG00000002718	Cse1l	protein_coding	4.68244e-06
aggregated_scATAC_peak_48440	chr2	167378903	167379473	upstream	30005	1	ENSMUSG00000017929	B4galt5	protein_coding	1.20087e-07
aggregated_scATAC_peak_48539	chr2	168104457	168105546	downstream	23998	1	ENSMUSG00000044641	Pard6b	protein_coding	5.75384e-09
aggregated_scATAC_peak_48584	chr2	168531773	168532533	NA	NA	0,1	NA	NA	NA	1.5437e-09
aggregated_scATAC_peak_48587	chr2	168575734	168576125	PeakInsideFeature	25727	1	ENSMUSG00000027544	Nfatc2	protein_coding	2.03796e-05
aggregated_scATAC_peak_48608	chr2	168762305	168762794	upstream	3593	0	ENSMUSG00000085322	Gm14261	processed_transcript	6.72901e-06
aggregated_scATAC_peak_48655	chr2	169473194	169473457	upstream	7291	1	ENSMUSG00000087074	Gm14249	lincRNA	1.98907e-06
aggregated_scATAC_peak_48656	chr2	169482126	169482504	PeakInsideFeature	1698	0	ENSMUSG00000087074	Gm14249	lincRNA	6.28057e-05
aggregated_scATAC_peak_48657	chr2	169483951	169484365	PeakInsideFeature	3541	1	ENSMUSG00000087074	Gm14249	lincRNA	5.53025e-05
aggregated_scATAC_peak_48663	chr2	169640166	169640581	PeakInsideFeature	7361	1	ENSMUSG00000047907	Tshz2	protein_coding	1.28865e-05
aggregated_scATAC_peak_48739	chr2	170459695	170460276	downstream	3833	1	ENSMUSG00000084067	Gm14269	processed_pseudogene	3.29852e-06
aggregated_scATAC_peak_48774	chr2	171173312	171173534	upstream	19846	1	ENSMUSG00000084829	Gm14266	lincRNA	4.94287e-07
aggregated_scATAC_peak_48790	chr2	171988624	171988824	PeakInsideFeature	471	0	ENSMUSG00000085426	Gm14272	lincRNA	2.64775e-07
aggregated_scATAC_peak_48798	chr2	172155869	172156082	upstream	20806	1	ENSMUSG00000105205	Gm44301	miRNA	9.8951e-06
aggregated_scATAC_peak_48812	chr2	172307790	172308307	upstream	16286	1	ENSMUSG00000085905	Gm14273	antisense_RNA	6.50447e-05
aggregated_scATAC_peak_48868	chr2	172901013	172901748	upstream	37039	1	ENSMUSG00000093160	Gm22773	miRNA	9.467e-06
aggregated_scATAC_peak_48914	chr2	173261572	173262044	PeakInsideFeature	14725	1	ENSMUSG00000038400	Pmepa1	protein_coding	1.85837e-05
aggregated_scATAC_peak_48915	chr2	173264629	173265123	PeakInsideFeature	11657	1	ENSMUSG00000038400	Pmepa1	protein_coding	6.77266e-06
aggregated_scATAC_peak_48933	chr2	173643335	173643587	PeakInsideFeature	16179	1	ENSMUSG00000055897	Ppp4r1l-ps	transcribed_unprocessed_pseudogene	9.66161e-08
aggregated_scATAC_peak_49045	chr2	178341271	178341554	NA	NA	0,1	NA	NA	NA	4.79571e-09
aggregated_scATAC_peak_49046	chr2	178342499	178342708	NA	NA	0,1	NA	NA	NA	3.61476e-07
aggregated_scATAC_peak_49144	chr2	180300369	180301229	upstream	10920	1	ENSMUSG00000038980	Rbbp8nl	protein_coding	1.58845e-07
aggregated_scATAC_peak_49173	chr2	180573504	180573780	upstream	7662	1	ENSMUSG00000027569	Mrgbp	protein_coding	8.65933e-06
aggregated_scATAC_peak_49265	chr2	181646726	181647413	upstream	9964	1	ENSMUSG00000108976	Gm29797	protein_coding	2.25448e-09
aggregated_scATAC_peak_49429	chr3	14624479	14624826	downstream	4588	1	ENSMUSG00000104249	Gm38151	processed_pseudogene	1.47539e-05
aggregated_scATAC_peak_49448	chr3	16368714	16369685	NA	NA	0,1	NA	NA	NA	4.28891e-07
aggregated_scATAC_peak_49576	chr3	27691071	27691515	PeakInsideFeature	20014	1	ENSMUSG00000039286	Fndc3b	protein_coding	7.63488e-07
aggregated_scATAC_peak_49579	chr3	27724158	27724871	upstream	13207	1	ENSMUSG00000039286	Fndc3b	protein_coding	3.40416e-10
aggregated_scATAC_peak_49581	chr3	27728872	27729674	upstream	17966	1	ENSMUSG00000039286	Fndc3b	protein_coding	1.12181e-07
aggregated_scATAC_peak_49619	chr3	28591388	28591695	NA	NA	0,1	NA	NA	NA	1.88775e-06
aggregated_scATAC_peak_49622	chr3	28681645	28682327	upstream	15917	1	ENSMUSG00000027690	Slc2a2	protein_coding	2.77815e-10
aggregated_scATAC_peak_49626	chr3	28722629	28722874	PeakInsideFeature	24849	1	ENSMUSG00000027690	Slc2a2	protein_coding	1.97148e-06
aggregated_scATAC_peak_49653	chr3	30050855	30051264	PeakInsideFeature	38681	1	ENSMUSG00000085702	Mecomos	antisense_RNA	1.51698e-08
aggregated_scATAC_peak_49658	chr3	30135840	30136248	downstream	25842	1	ENSMUSG00000104486	Gm38066	TEC	1.99597e-06
aggregated_scATAC_peak_49667	chr3	30303606	30304328	upstream	29582	1	ENSMUSG00000103870	Gm38362	TEC	9.44833e-07
aggregated_scATAC_peak_49676	chr3	30450275	30450910	upstream	37834	1	ENSMUSG00000104079	Gm37024	TEC	1.25759e-07
aggregated_scATAC_peak_49678	chr3	30481734	30482226	upstream	6446	1	ENSMUSG00000104079	Gm37024	TEC	6.54096e-05
aggregated_scATAC_peak_49698	chr3	30977034	30977475	downstream	2605	1	ENSMUSG00000102741	Gm2979	processed_pseudogene	5.79183e-07
aggregated_scATAC_peak_49709	chr3	31212490	31212788	NA	NA	0,1	NA	NA	NA	3.38746e-05
aggregated_scATAC_peak_49733	chr3	32265801	32266125	downstream	5630	1	ENSMUSG00000103643	Gm37770	processed_pseudogene	8.97618e-05
aggregated_scATAC_peak_49735	chr3	32304155	32304795	downstream	44142	1	ENSMUSG00000103643	Gm37770	processed_pseudogene	1.84962e-05
aggregated_scATAC_peak_49841	chr3	35357150	35357574	downstream	31748	1	ENSMUSG00000093499	Gm25442	miRNA	3.3111e-05
aggregated_scATAC_peak_49925	chr3	37723076	37723556	PeakInsideFeature	1174	0	ENSMUSG00000058174	Gm5148	protein_coding	8.16008e-05
aggregated_scATAC_peak_49967	chr3	38684325	38684555	NA	NA	0,1	NA	NA	NA	2.5639e-06
aggregated_scATAC_peak_50027	chr3	41580794	41581768	upstream	17583	1	ENSMUSG00000103843	Gm31266	antisense_RNA	6.64702e-08
aggregated_scATAC_peak_50144	chr3	51915897	51916809	upstream	7537	1	ENSMUSG00000103701	Gm10728	TEC	2.55392e-05
aggregated_scATAC_peak_50177	chr3	52185596	52186159	upstream	695	0	ENSMUSG00000104055	Gm38132	processed_transcript	2.26995e-05
aggregated_scATAC_peak_50229	chr3	53159208	53159435	upstream	45911	1	ENSMUSG00000104968	Gm43803	antisense_RNA	2.53205e-05
aggregated_scATAC_peak_50268	chr3	54420834	54421457	NA	NA	0,1	NA	NA	NA	5.61695e-05
aggregated_scATAC_peak_50272	chr3	54599218	54599773	upstream	31943	1	ENSMUSG00000097599	Gm26678	lincRNA	3.40977e-06
aggregated_scATAC_peak_50275	chr3	54687281	54687650	upstream	5341	1	ENSMUSG00000027751	Supt20	protein_coding	2.06597e-05
aggregated_scATAC_peak_50324	chr3	56301587	56301825	NA	NA	0,1	NA	NA	NA	1.23028e-08
aggregated_scATAC_peak_50357	chr3	58245548	58245833	downstream	44667	1	ENSMUSG00000065722	Gm26166	snRNA	6.52355e-08
aggregated_scATAC_peak_50371	chr3	58679351	58679652	PeakInsideFeature	12898	1	ENSMUSG00000036432	Siah2	protein_coding	8.53806e-05
aggregated_scATAC_peak_50450	chr3	63893809	63894065	PeakInsideFeature	5535	1	ENSMUSG00000036834	Plch1	protein_coding	6.41857e-05
aggregated_scATAC_peak_50508	chr3	65885489	65885947	upstream	13437	1	ENSMUSG00000103620	Gm37359	antisense_RNA	1.13854e-05
aggregated_scATAC_peak_50518	chr3	66079145	66079484	upstream	7370	1	ENSMUSG00000104189	Gm37822	TEC	5.56184e-05
aggregated_scATAC_peak_50622	chr3	69859792	69860765	overlapStart	338	0	ENSMUSG00000043461	Sptssb	protein_coding	6.46311e-07
aggregated_scATAC_peak_50670	chr3	79223303	79223807	PeakInsideFeature	10636	1	ENSMUSG00000104585	4921511C10Rik	antisense_RNA	6.89283e-07
aggregated_scATAC_peak_50696	chr3	79878417	79878684	upstream	5983	1	ENSMUSG00000027955	Fam198b	protein_coding	2.29996e-05
aggregated_scATAC_peak_50721	chr3	81535338	81536319	downstream	20997	1	ENSMUSG00000102710	Gm4857	processed_pseudogene	5.51353e-08
aggregated_scATAC_peak_50765	chr3	83266102	83266343	NA	NA	0,1	NA	NA	NA	1.29869e-13
aggregated_scATAC_peak_50824	chr3	84373377	84374146	PeakInsideFeature	6159	1	ENSMUSG00000104004	4930565D16Rik	lincRNA	2.00219e-06
aggregated_scATAC_peak_50828	chr3	84412897	84413550	upstream	33303	1	ENSMUSG00000104004	4930565D16Rik	lincRNA	1.98204e-05
aggregated_scATAC_peak_50870	chr3	85209734	85210402	upstream	13621	1	ENSMUSG00000102703	Gm38313	TEC	2.09468e-05
aggregated_scATAC_peak_50878	chr3	85516546	85517615	downstream	36309	1	ENSMUSG00000106422	Gm42812	lincRNA	2.67388e-10
aggregated_scATAC_peak_51052	chr3	88252816	88253120	PeakInsideFeature	1741	0	ENSMUSG00000104445	Rhbg	protein_coding	1.58912e-06
aggregated_scATAC_peak_51067	chr3	88422119	88422486	PeakInsideFeature	2837	0	ENSMUSG00000050144	Slc25a44	protein_coding	1.51836e-05
aggregated_scATAC_peak_51074	chr3	88470897	88471582	upstream	3344	0	ENSMUSG00000103304	Gm5979	unprocessed_pseudogene	1.11174e-05
aggregated_scATAC_peak_51121	chr3	88983839	88984309	upstream	13345	1	ENSMUSG00000095712	Gm26465	snRNA	2.70075e-10
aggregated_scATAC_peak_51209	chr3	89718363	89718596	PeakInsideFeature	3458	1	ENSMUSG00000027951	Adar	protein_coding	1.94649e-09
aggregated_scATAC_peak_51233	chr3	90004194	90004904	upstream	5769	1	ENSMUSG00000027944	Hax1	protein_coding	4.53901e-06
aggregated_scATAC_peak_51611	chr3	97615251	97615462	upstream	5153	1	ENSMUSG00000028089	Chd1l	protein_coding	4.68016e-06
aggregated_scATAC_peak_51626	chr3	97823941	97825165	NA	NA	0,1	NA	NA	NA	1.07e-05
aggregated_scATAC_peak_51647	chr3	98044894	98045363	downstream	14441	1	ENSMUSG00000105728	Gm42819	TEC	2.61575e-06
aggregated_scATAC_peak_51654	chr3	98106607	98106949	upstream	14810	1	ENSMUSG00000106427	Gm42820	TEC	1.53062e-06
aggregated_scATAC_peak_51703	chr3	99665485	99665697	downstream	42256	1	ENSMUSG00000064890	Gm22505	snRNA	1.50702e-05
aggregated_scATAC_peak_51739	chr3	100810355	100810930	upstream	14817	1	ENSMUSG00000051076	Vtcn1	protein_coding	3.24543e-06
aggregated_scATAC_peak_51805	chr3	101663653	101664163	upstream	27881	1	ENSMUSG00000106070	Gm43135	lincRNA	8.1899e-09
aggregated_scATAC_peak_51816	chr3	101805472	101805988	downstream	43229	1	ENSMUSG00000044313	Mab21l3	protein_coding	7.29793e-07
aggregated_scATAC_peak_51822	chr3	101852532	101853402	upstream	4008	0	ENSMUSG00000044313	Mab21l3	protein_coding	7.17771e-06
aggregated_scATAC_peak_51847	chr3	102152644	102153319	downstream	18367	1	ENSMUSG00000106296	4632404M16Rik	sense_intronic	8.86464e-07
aggregated_scATAC_peak_51881	chr3	102977435	102977696	upstream	13433	1	ENSMUSG00000048938	Nr1h5	protein_coding	9.33141e-07
aggregated_scATAC_peak_51898	chr3	103366826	103367056	upstream	25992	1	ENSMUSG00000089029	Gm25009	snoRNA	7.15156e-06
aggregated_scATAC_peak_51936	chr3	104244470	104244698	upstream	24210	1	ENSMUSG00000052539	Magi3	protein_coding	1.10205e-07
aggregated_scATAC_peak_51938	chr3	104279547	104279934	NA	NA	0,1	NA	NA	NA	1.61511e-05
aggregated_scATAC_peak_51960	chr3	104540787	104541060	upstream	29006	1	ENSMUSG00000032913	Lrig2	protein_coding	1.43866e-05
aggregated_scATAC_peak_51962	chr3	104548225	104549008	upstream	36698	1	ENSMUSG00000032913	Lrig2	protein_coding	1.04352e-08
aggregated_scATAC_peak_52006	chr3	105030667	105031436	PeakInsideFeature	22094	1	ENSMUSG00000062127	Cttnbp2nl	protein_coding	1.37394e-07
aggregated_scATAC_peak_52047	chr3	105846241	105846721	upstream	24377	1	ENSMUSG00000000562	Adora3	protein_coding	1.65515e-05
aggregated_scATAC_peak_52103	chr3	107545545	107546341	downstream	9130	1	ENSMUSG00000055891	Ubl4b	protein_coding	5.95582e-06
aggregated_scATAC_peak_52121	chr3	107751447	107751779	PeakInsideFeature	8856	1	ENSMUSG00000014599	Csf1	protein_coding	1.67707e-05
aggregated_scATAC_peak_52126	chr3	107768385	107769143	upstream	8295	1	ENSMUSG00000014599	Csf1	protein_coding	2.54784e-05
aggregated_scATAC_peak_52183	chr3	108476783	108477479	upstream	20987	1	ENSMUSG00000080673	Gm23336	snRNA	4.5979e-07
aggregated_scATAC_peak_52356	chr3	121411460	121411754	upstream	14890	1	ENSMUSG00000053931	Cnn3	protein_coding	5.67183e-05
aggregated_scATAC_peak_52375	chr3	121646634	121647244	upstream	3454	0	ENSMUSG00000044522	A730020M07Rik	lincRNA	6.53801e-08
aggregated_scATAC_peak_52415	chr3	122058505	122059412	PeakInsideFeature	14515	1	ENSMUSG00000028125	Abca4	protein_coding	6.84344e-08
aggregated_scATAC_peak_52433	chr3	122235820	122236099	upstream	3324	0	ENSMUSG00000092934	Gm22903	miRNA	2.71573e-08
aggregated_scATAC_peak_52448	chr3	122393129	122393739	upstream	1623	0	ENSMUSG00000104554	Gm4610	antisense_RNA	3.50446e-07
aggregated_scATAC_peak_52522	chr3	123343605	123344118	downstream	42246	1	ENSMUSG00000028114	Mettl14	protein_coding	7.44395e-11
aggregated_scATAC_peak_52525	chr3	123426282	123426590	upstream	20477	1	ENSMUSG00000027978	Prss12	protein_coding	2.52344e-06
aggregated_scATAC_peak_52546	chr3	126869604	126869806	NA	NA	0,1	NA	NA	NA	3.75165e-05
aggregated_scATAC_peak_52551	chr3	127130543	127130851	downstream	9793	1	ENSMUSG00000104963	Gm42974	TEC	1.00848e-07
aggregated_scATAC_peak_52707	chr3	130943036	130943236	upstream	5799	1	ENSMUSG00000106095	2010110G14Rik	lincRNA	6.94647e-05
aggregated_scATAC_peak_52708	chr3	130943326	130943806	upstream	6229	1	ENSMUSG00000106095	2010110G14Rik	lincRNA	2.29816e-08
aggregated_scATAC_peak_52782	chr3	132920226	132921117	upstream	19198	1	ENSMUSG00000089431	Gm23196	snRNA	2.12508e-07
aggregated_scATAC_peak_52790	chr3	133234827	133235171	overlapStart	50	0	ENSMUSG00000040969	Arhgef38	protein_coding	2.76283e-06
aggregated_scATAC_peak_52860	chr3	135845705	135846193	upstream	5680	1	ENSMUSG00000106306	4933401H06Rik	processed_transcript	3.80805e-06
aggregated_scATAC_peak_52910	chr3	138131213	138131570	upstream	12056	1	ENSMUSG00000004127	Trmt10a	protein_coding	1.33141e-05
aggregated_scATAC_peak_52981	chr3	142065155	142065450	NA	NA	0,1	NA	NA	NA	1.99845e-05
aggregated_scATAC_peak_52993	chr3	142423497	142424133	upstream	28119	1	ENSMUSG00000028273	Pdlim5	protein_coding	4.59031e-05
aggregated_scATAC_peak_53015	chr3	142917678	142918359	downstream	19943	1	ENSMUSG00000105671	Gm31306	transcribed_processed_pseudogene	2.98218e-07
aggregated_scATAC_peak_53027	chr3	143743205	143743681	overlapStart	66	0	ENSMUSG00000105324	Gm42705	lincRNA	1.19568e-07
aggregated_scATAC_peak_53029	chr3	143822689	143823206	NA	NA	0,1	NA	NA	NA	5.01158e-06
aggregated_scATAC_peak_53030	chr3	143823496	143823721	upstream	49387	1	ENSMUSG00000105492	Gm2505	processed_pseudogene	9.20442e-06
aggregated_scATAC_peak_53076	chr3	144890237	144890467	PeakInsideFeature	5659	1	ENSMUSG00000074196	Clca4c-ps	transcribed_unprocessed_pseudogene	4.8344e-06
aggregated_scATAC_peak_53079	chr3	145032930	145033298	upstream	338	0	ENSMUSG00000028255	Clca1	protein_coding	5.23901e-06
aggregated_scATAC_peak_53093	chr3	145634317	145634729	downstream	15458	1	ENSMUSG00000028195	Cyr61	protein_coding	9.01896e-08
aggregated_scATAC_peak_53103	chr3	145780886	145781535	PeakInsideFeature	22535	1	ENSMUSG00000028194	Ddah1	protein_coding	5.98972e-10
aggregated_scATAC_peak_53111	chr3	145862640	145862895	upstream	16252	1	ENSMUSG00000105388	Rpl36a-ps2	processed_pseudogene	3.13303e-08
aggregated_scATAC_peak_53204	chr3	148899852	148900106	NA	NA	0,1	NA	NA	NA	5.56056e-05
aggregated_scATAC_peak_53399	chr3	155994129	155994488	PeakInsideFeature	17954	1	ENSMUSG00000104553	9330178D15Rik	lincRNA	4.49512e-10
aggregated_scATAC_peak_53493	chr4	6494147	6494454	downstream	14084	1	ENSMUSG00000081913	Gm11803	processed_pseudogene	1.16043e-06
aggregated_scATAC_peak_53504	chr4	7921610	7921906	NA	NA	0,1	NA	NA	NA	3.61682e-06
aggregated_scATAC_peak_53519	chr4	8516497	8516830	upstream	18980	1	ENSMUSG00000047187	Rab2a	protein_coding	4.41416e-06
aggregated_scATAC_peak_53644	chr4	11653490	11654059	upstream	3275	0	ENSMUSG00000084046	Gm11833	processed_pseudogene	7.66496e-06
aggregated_scATAC_peak_53832	chr4	31299743	31300254	NA	NA	0,1	NA	NA	NA	1.01316e-09
aggregated_scATAC_peak_53951	chr4	33870994	33871607	NA	NA	0,1	NA	NA	NA	3.45444e-14
aggregated_scATAC_peak_53952	chr4	33911959	33912613	upstream	12307	1	ENSMUSG00000044288	Cnr1	protein_coding	3.83009e-05
aggregated_scATAC_peak_54048	chr4	40874219	40874534	upstream	20371	1	ENSMUSG00000028413	B4galt1	protein_coding	7.4219e-07
aggregated_scATAC_peak_54060	chr4	41042976	41043212	PeakInsideFeature	5045	1	ENSMUSG00000028427	Aqp7	protein_coding	2.32265e-05
aggregated_scATAC_peak_54100	chr4	41629895	41630677	upstream	9092	1	ENSMUSG00000084761	Gm12406	antisense_RNA	6.01305e-06
aggregated_scATAC_peak_54168	chr4	43472717	43473039	downstream	10856	1	ENSMUSG00000028460	Sit1	protein_coding	6.66582e-06
aggregated_scATAC_peak_54260	chr4	44658924	44659237	upstream	5335	1	ENSMUSG00000086211	Gm12462	antisense_RNA	4.28721e-08
aggregated_scATAC_peak_54323	chr4	45502019	45502336	upstream	1626	0	ENSMUSG00000088892	Gm22518	miRNA	1.75873e-07
aggregated_scATAC_peak_54361	chr4	45848398	45849227	overlapStart	148	0	ENSMUSG00000028327	Stra6l	protein_coding	1.24504e-09
aggregated_scATAC_peak_54444	chr4	46628834	46629264	PeakInsideFeature	21160	1	ENSMUSG00000039813	Tbc1d2	protein_coding	4.94632e-06
aggregated_scATAC_peak_54465	chr4	46968039	46968394	PeakInsideFeature	23657	1	ENSMUSG00000039809	Gabbr2	protein_coding	5.39032e-07
aggregated_scATAC_peak_54474	chr4	47050119	47051843	PeakInsideFeature	6325	1	ENSMUSG00000066191	Anks6	protein_coding	9.10439e-05
aggregated_scATAC_peak_54509	chr4	48023105	48023305	upstream	21948	1	ENSMUSG00000028341	Nr4a3	protein_coding	1.71711e-05
aggregated_scATAC_peak_54532	chr4	48668734	48668948	PeakInsideFeature	5327	1	ENSMUSG00000028348	Cavin4	protein_coding	2.54382e-07
aggregated_scATAC_peak_54533	chr4	48669098	48669332	PeakInsideFeature	5701	1	ENSMUSG00000028348	Cavin4	protein_coding	6.83439e-06
aggregated_scATAC_peak_54547	chr4	49205951	49206161	NA	NA	0,1	NA	NA	NA	2.76796e-07
aggregated_scATAC_peak_54679	chr4	55571436	55571982	PeakInsideFeature	8444	1	ENSMUSG00000066176	Gm12511	lincRNA	2.45435e-07
aggregated_scATAC_peak_54680	chr4	55624801	55625018	PeakInsideFeature	19761	1	ENSMUSG00000085375	Gm12506	lincRNA	1.43283e-15
aggregated_scATAC_peak_54716	chr4	57070642	57071426	NA	NA	0,1	NA	NA	NA	7.02265e-07
aggregated_scATAC_peak_54720	chr4	57129722	57130407	PeakInsideFeature	13373	1	ENSMUSG00000028434	Epb41l4b	protein_coding	1.0392e-08
aggregated_scATAC_peak_54822	chr4	58745609	58745943	downstream	41940	1	ENSMUSG00000043385	Olfr267	protein_coding	2.03688e-08
aggregated_scATAC_peak_54851	chr4	59387477	59388615	upstream	19180	1	ENSMUSG00000083979	Gm12527	processed_pseudogene	1.47609e-06
aggregated_scATAC_peak_54856	chr4	59447392	59447657	upstream	8891	1	ENSMUSG00000038578	Susd1	protein_coding	4.93682e-05
aggregated_scATAC_peak_54857	chr4	59452360	59453211	upstream	14153	1	ENSMUSG00000038578	Susd1	protein_coding	2.19513e-12
aggregated_scATAC_peak_54935	chr4	62628518	62628915	PeakInsideFeature	4996	0	ENSMUSG00000085177	Gm11209	antisense_RNA	5.92447e-07
aggregated_scATAC_peak_54967	chr4	63006386	63006956	PeakInsideFeature	41098	1	ENSMUSG00000028358	Zfp618	protein_coding	1.45733e-09
aggregated_scATAC_peak_54969	chr4	63052385	63052954	NA	NA	0,1	NA	NA	NA	7.91868e-06
aggregated_scATAC_peak_54974	chr4	63156778	63157541	upstream	2361	0	ENSMUSG00000028356	Ambp	protein_coding	6.92445e-12
aggregated_scATAC_peak_54977	chr4	63171703	63172695	overlapStart	68	0	ENSMUSG00000028357	Kif12	protein_coding	3.06313e-08
aggregated_scATAC_peak_55001	chr4	63455557	63455942	PeakInsideFeature	40241	1	ENSMUSG00000039137	Whrn	protein_coding	9.2728e-07
aggregated_scATAC_peak_55052	chr4	65700219	65700480	NA	NA	0,1	NA	NA	NA	7.50189e-05
aggregated_scATAC_peak_55127	chr4	78432290	78432490	NA	NA	0,1	NA	NA	NA	4.73882e-05
aggregated_scATAC_peak_55131	chr4	78784088	78785064	NA	NA	0,1	NA	NA	NA	4.11697e-08
aggregated_scATAC_peak_55308	chr4	86724889	86725712	upstream	23255	1	ENSMUSG00000038024	Dennd4c	protein_coding	1.19746e-06
aggregated_scATAC_peak_55350	chr4	87881684	87881982	NA	NA	0,1	NA	NA	NA	5.81761e-06
aggregated_scATAC_peak_55353	chr4	87978064	87978399	NA	NA	0,1	NA	NA	NA	1.33802e-07
aggregated_scATAC_peak_55406	chr4	89451751	89452109	downstream	6711	1	ENSMUSG00000098669	Gm27580	misc_RNA	1.92443e-06
aggregated_scATAC_peak_55424	chr4	92246856	92247168	NA	NA	0,1	NA	NA	NA	1.19587e-05
aggregated_scATAC_peak_55451	chr4	95133646	95134147	upstream	17844	1	ENSMUSG00000100189	Gm28096	sense_intronic	3.87414e-06
aggregated_scATAC_peak_55453	chr4	95143297	95144162	upstream	8010	1	ENSMUSG00000100189	Gm28096	sense_intronic	4.0074e-07
aggregated_scATAC_peak_55459	chr4	95278327	95279193	NA	NA	0,1	NA	NA	NA	1.03189e-05
aggregated_scATAC_peak_55466	chr4	95444555	95444819	upstream	39269	1	ENSMUSG00000085835	Gm12707	processed_transcript	8.82319e-05
aggregated_scATAC_peak_55562	chr4	99376188	99376617	PeakInsideFeature	9310	1	ENSMUSG00000103097	Gm37556	TEC	1.38768e-09
aggregated_scATAC_peak_55621	chr4	100790150	100790541	PeakInsideFeature	13671	1	ENSMUSG00000028532	Cachd1	protein_coding	8.81317e-05
aggregated_scATAC_peak_55631	chr4	100909468	100910324	NA	NA	0,1	NA	NA	NA	1.14253e-07
aggregated_scATAC_peak_55655	chr4	101344824	101345603	downstream	1813	0	ENSMUSG00000065451	Mir101a	miRNA	1.52172e-07
aggregated_scATAC_peak_55674	chr4	101805780	101806074	downstream	38096	1	ENSMUSG00000035201	B020004J07Rik	protein_coding	3.31034e-08
aggregated_scATAC_peak_55695	chr4	102604007	102604261	NA	NA	0,1	NA	NA	NA	7.5676e-05
aggregated_scATAC_peak_55749	chr4	104530265	104530662	NA	NA	0,1	NA	NA	NA	1.33944e-09
aggregated_scATAC_peak_55781	chr4	105252712	105253410	NA	NA	0,1	NA	NA	NA	1.02148e-06
aggregated_scATAC_peak_55787	chr4	105289548	105290140	NA	NA	0,1	NA	NA	NA	6.59116e-08
aggregated_scATAC_peak_55794	chr4	105449219	105449791	NA	NA	0,1	NA	NA	NA	9.88519e-05
aggregated_scATAC_peak_55901	chr4	106982594	106983083	downstream	39661	1	ENSMUSG00000085581	Gm12786	antisense_RNA	9.18664e-11
aggregated_scATAC_peak_55937	chr4	107443137	107443440	PeakInsideFeature	8697	1	ENSMUSG00000034762	Glis1	protein_coding	1.69754e-05
aggregated_scATAC_peak_55969	chr4	107732263	107733230	downstream	27719	1	ENSMUSG00000084874	Gm12906	processed_pseudogene	1.36562e-05
aggregated_scATAC_peak_55980	chr4	107822890	107823482	overlapStart	164	0	ENSMUSG00000073779	Lrp8os2	antisense_RNA	9.74104e-05
aggregated_scATAC_peak_56170	chr4	114677228	114677703	upstream	3338	0	ENSMUSG00000085870	Gm12829	lincRNA	4.68424e-06
aggregated_scATAC_peak_56219	chr4	115767800	115768390	downstream	12923	1	ENSMUSG00000044556	Tex38	protein_coding	4.18738e-06
aggregated_scATAC_peak_56297	chr4	116865002	116865274	downstream	10327	1	ENSMUSG00000082063	Gm12993	processed_pseudogene	1.02924e-05
aggregated_scATAC_peak_56299	chr4	116894254	116895222	upstream	9899	1	ENSMUSG00000088845	Gm26355	snRNA	3.09003e-06
aggregated_scATAC_peak_56341	chr4	117333177	117333867	downstream	37705	1	ENSMUSG00000085749	Gm12843	antisense_RNA	2.86797e-10
aggregated_scATAC_peak_56345	chr4	117357046	117357434	NA	NA	0,1	NA	NA	NA	7.26188e-06
aggregated_scATAC_peak_56372	chr4	117630174	117631002	NA	NA	0,1	NA	NA	NA	1.32433e-09
aggregated_scATAC_peak_56377	chr4	117658670	117659385	downstream	23245	1	ENSMUSG00000009640	Dmap1	protein_coding	2.63798e-05
aggregated_scATAC_peak_56414	chr4	118122734	118123553	PeakInsideFeature	11770	1	ENSMUSG00000028538	St3gal3	protein_coding	1.3394e-05
aggregated_scATAC_peak_56464	chr4	118773021	118773360	downstream	9396	1	ENSMUSG00000111159	Olfr1337	protein_coding	3.1936e-05
aggregated_scATAC_peak_56744	chr4	124221157	124221378	NA	NA	0,1	NA	NA	NA	2.09367e-05
aggregated_scATAC_peak_56755	chr4	124340281	124340482	upstream	4701	0	ENSMUSG00000088933	Gm22983	snRNA	5.64423e-06
aggregated_scATAC_peak_56874	chr4	125809666	125810012	NA	NA	0,1	NA	NA	NA	7.67979e-05
aggregated_scATAC_peak_56991	chr4	127419005	127420014	upstream	10712	1	ENSMUSG00000079998	Gm12947	processed_pseudogene	7.26809e-05
aggregated_scATAC_peak_56994	chr4	127440831	127441064	upstream	32150	1	ENSMUSG00000079998	Gm12947	processed_pseudogene	3.86921e-07
aggregated_scATAC_peak_57013	chr4	128224557	128224788	downstream	36285	1	ENSMUSG00000048686	Hmgb4	protein_coding	4.2861e-06
aggregated_scATAC_peak_57021	chr4	128597845	128598727	PeakInsideFeature	11812	1	ENSMUSG00000061894	Zscan20	protein_coding	4.26982e-08
aggregated_scATAC_peak_57031	chr4	128678491	128679229	PeakInsideFeature	24158	1	ENSMUSG00000028796	Phc2	protein_coding	5.06064e-06
aggregated_scATAC_peak_57073	chr4	129035254	129035820	downstream	22446	1	ENSMUSG00000085085	1700086P04Rik	lincRNA	1.82712e-05
aggregated_scATAC_peak_57088	chr4	129151230	129151642	downstream	14437	1	ENSMUSG00000001334	Fndc5	protein_coding	1.56407e-06
aggregated_scATAC_peak_57160	chr4	129915441	129915767	PeakInsideFeature	9388	1	ENSMUSG00000086369	E330017L17Rik	lincRNA	1.07417e-05
aggregated_scATAC_peak_57269	chr4	131362854	131363408	NA	NA	0,1	NA	NA	NA	1.7156e-06
aggregated_scATAC_peak_57279	chr4	131538299	131538566	NA	NA	0,1	NA	NA	NA	6.5552e-07
aggregated_scATAC_peak_57283	chr4	131672227	131673069	PeakInsideFeature	5197	1	ENSMUSG00000087171	Gm12962	lincRNA	2.18294e-10
aggregated_scATAC_peak_57284	chr4	131673161	131673361	PeakInsideFeature	4584	0	ENSMUSG00000087171	Gm12962	lincRNA	4.02839e-07
aggregated_scATAC_peak_57293	chr4	131826623	131827605	PeakInsideFeature	11174	1	ENSMUSG00000028909	Ptpru	protein_coding	1.69968e-06
aggregated_scATAC_peak_57321	chr4	132151727	132151975	upstream	2967	0	ENSMUSG00000081394	Gm13215	processed_pseudogene	1.18991e-07
aggregated_scATAC_peak_57349	chr4	132469815	132470379	upstream	6176	1	ENSMUSG00000066042	Med18	protein_coding	3.13481e-08
aggregated_scATAC_peak_57469	chr4	133557129	133557891	downstream	1439	0	ENSMUSG00000093886	Gm23158	miRNA	1.74335e-10
aggregated_scATAC_peak_57495	chr4	133828807	133829461	downstream	12714	1	ENSMUSG00000084789	Gm12974	lincRNA	4.06735e-06
aggregated_scATAC_peak_57539	chr4	134223102	134223548	PeakInsideFeature	4058	0	ENSMUSG00000048003	Catsper4	protein_coding	4.67586e-05
aggregated_scATAC_peak_57586	chr4	134567508	134568114	FeatureInsidePeak	40	0	ENSMUSG00000099289	Mir6403	miRNA	1.03002e-05
aggregated_scATAC_peak_57668	chr4	135335777	135336064	PeakInsideFeature	17401	1	ENSMUSG00000028809	Srrm1	protein_coding	9.88749e-05
aggregated_scATAC_peak_57672	chr4	135397669	135398580	overlapStart	103	0	ENSMUSG00000043924	Ncmap	protein_coding	1.54691e-05
aggregated_scATAC_peak_57678	chr4	135453537	135453980	downstream	2877	1	ENSMUSG00000103955	Gm37270	TEC	6.98185e-07
aggregated_scATAC_peak_57692	chr4	135573240	135573866	overlapStart	77	0	ENSMUSG00000037188	Grhl3	protein_coding	1.49575e-05
aggregated_scATAC_peak_57715	chr4	135752457	135753464	downstream	3735	1	ENSMUSG00000082743	Gm12988	processed_pseudogene	1.24027e-09
aggregated_scATAC_peak_57770	chr4	136186826	136187441	PeakInsideFeature	14740	1	ENSMUSG00000018983	E2f2	protein_coding	1.34948e-05
aggregated_scATAC_peak_57867	chr4	137077301	137077925	upstream	28812	1	ENSMUSG00000060862	Zbtb40	protein_coding	4.08876e-08
aggregated_scATAC_peak_57912	chr4	137461868	137462768	upstream	6451	1	ENSMUSG00000028763	Hspg2	protein_coding	5.34145e-05
aggregated_scATAC_peak_57925	chr4	137642051	137642489	upstream	22456	1	ENSMUSG00000041351	Rap1gap	protein_coding	5.5234e-06
aggregated_scATAC_peak_58120	chr4	139639855	139640293	upstream	3968	0	ENSMUSG00000098569	Mir7020	miRNA	1.1194e-06
aggregated_scATAC_peak_58212	chr4	140524988	140525305	NA	NA	0,1	NA	NA	NA	6.50447e-05
aggregated_scATAC_peak_58213	chr4	140525767	140526048	NA	NA	0,1	NA	NA	NA	2.48979e-07
aggregated_scATAC_peak_58224	chr4	140624442	140625260	PeakInsideFeature	41161	1	ENSMUSG00000040964	Arhgef10l	protein_coding	1.74857e-05
aggregated_scATAC_peak_58238	chr4	140691079	140691350	upstream	1483	0	ENSMUSG00000095878	Gm23045	miRNA	1.40287e-05
aggregated_scATAC_peak_58241	chr4	140708471	140708734	PeakInsideFeature	8061	1	ENSMUSG00000040945	Rcc2	protein_coding	1.55096e-10
aggregated_scATAC_peak_58269	chr4	140919685	140920244	downstream	1280	0	ENSMUSG00000064443	Gm26226	snRNA	2.80432e-05
aggregated_scATAC_peak_58311	chr4	141281087	141281757	downstream	2983	1	ENSMUSG00000085395	Gm13056	lincRNA	2.31153e-08
aggregated_scATAC_peak_58314	chr4	141291488	141292146	upstream	9423	1	ENSMUSG00000006445	Epha2	protein_coding	1.53427e-07
aggregated_scATAC_peak_58353	chr4	141599484	141600299	PeakInsideFeature	6204	1	ENSMUSG00000006219	Fblim1	protein_coding	5.16702e-05
aggregated_scATAC_peak_58414	chr4	142173709	142174830	upstream	6332	1	ENSMUSG00000087525	Gm13062	antisense_RNA	3.0794e-07
aggregated_scATAC_peak_58471	chr4	144782549	144782769	PeakInsideFeature	3924	0	ENSMUSG00000078504	Gm438	protein_coding	2.76816e-05
aggregated_scATAC_peak_58641	chr4	148908144	148909132	downstream	5686	1	ENSMUSG00000086766	Gm15969	antisense_RNA	3.54819e-06
aggregated_scATAC_peak_58835	chr4	150676018	150676351	PeakInsideFeature	2608	0	ENSMUSG00000085869	Gm16079	lincRNA	9.94317e-07
aggregated_scATAC_peak_58848	chr4	150746148	150746399	NA	NA	0,1	NA	NA	NA	7.19122e-05
aggregated_scATAC_peak_58924	chr4	151495423	151495816	NA	NA	0,1	NA	NA	NA	8.79501e-08
aggregated_scATAC_peak_59130	chr4	154497429	154497730	NA	NA	0,1	NA	NA	NA	7.29455e-06
aggregated_scATAC_peak_59131	chr4	154499473	154500090	NA	NA	0,1	NA	NA	NA	8.99816e-09
aggregated_scATAC_peak_59209	chr4	155205906	155206293	PeakInsideFeature	16492	1	ENSMUSG00000029050	Ski	protein_coding	3.19993e-07
aggregated_scATAC_peak_59275	chr4	156059274	156060241	overlapStart	44	0	ENSMUSG00000086549	Gm13648	processed_transcript	2.79839e-06
aggregated_scATAC_peak_59378	chr5	5588752	5588952	downstream	15053	1	ENSMUSG00000073234	Gm8773	protein_coding	1.24343e-06
aggregated_scATAC_peak_59481	chr5	17271708	17272512	upstream	44176	1	ENSMUSG00000091273	Gm6673	unprocessed_pseudogene	3.42084e-06
aggregated_scATAC_peak_59483	chr5	17408934	17409210	downstream	28499	1	ENSMUSG00000090750	Gm21999	unprocessed_pseudogene	2.41932e-10
aggregated_scATAC_peak_59487	chr5	17648725	17649119	NA	NA	0,1	NA	NA	NA	8.43412e-05
aggregated_scATAC_peak_59494	chr5	18114792	18115654	NA	NA	0,1	NA	NA	NA	5.18571e-08
aggregated_scATAC_peak_59520	chr5	20512478	20513188	NA	NA	0,1	NA	NA	NA	1.12571e-05
aggregated_scATAC_peak_59655	chr5	24427971	24428440	PeakInsideFeature	4369	0	ENSMUSG00000028962	Slc4a2	protein_coding	1.99567e-06
aggregated_scATAC_peak_59667	chr5	24490292	24490903	downstream	36604	1	ENSMUSG00000067724	Gbx1	protein_coding	9.00012e-05
aggregated_scATAC_peak_59824	chr5	28943576	28944340	NA	NA	0,1	NA	NA	NA	1.59039e-05
aggregated_scATAC_peak_59832	chr5	29211951	29212776	upstream	5360	1	ENSMUSG00000089975	Gm7420	transcribed_processed_pseudogene	1.13021e-09
aggregated_scATAC_peak_59841	chr5	29410635	29411197	upstream	23748	1	ENSMUSG00000001569	Nom1	protein_coding	7.96589e-10
aggregated_scATAC_peak_59842	chr5	29423479	29423769	upstream	11040	1	ENSMUSG00000001569	Nom1	protein_coding	7.03744e-05
aggregated_scATAC_peak_59852	chr5	29504923	29505301	upstream	23481	1	ENSMUSG00000093875	Gm24538	snRNA	1.13352e-07
aggregated_scATAC_peak_59869	chr5	30145491	30145710	PeakInsideFeature	9562	1	ENSMUSG00000025745	Hadha	protein_coding	5.37506e-05
aggregated_scATAC_peak_60051	chr5	33043391	33043711	upstream	6434	1	ENSMUSG00000107046	Gm43849	processed_pseudogene	5.70418e-06
aggregated_scATAC_peak_60052	chr5	33104022	33104570	overlapStart	77	0	ENSMUSG00000011034	Slc5a1	protein_coding	5.19147e-06
aggregated_scATAC_peak_60105	chr5	33736253	33736514	upstream	12715	1	ENSMUSG00000106896	G630022F23Rik	TEC	2.09017e-05
aggregated_scATAC_peak_60163	chr5	35041332	35041699	overlapStart	7	0	ENSMUSG00000029102	Hgfac	protein_coding	6.08733e-08
aggregated_scATAC_peak_60255	chr5	35900216	35901653	PeakInsideFeature	7615	1	ENSMUSG00000029094	Afap1	protein_coding	3.57143e-05
aggregated_scATAC_peak_60340	chr5	36911002	36911403	downstream	1088	0	ENSMUSG00000106934	Gm42506	TEC	1.167e-05
aggregated_scATAC_peak_60401	chr5	37974451	37975237	upstream	8849	1	ENSMUSG00000107126	Gm40289	lincRNA	4.6187e-07
aggregated_scATAC_peak_60408	chr5	38140948	38141236	upstream	4995	0	ENSMUSG00000107276	Gm42858	TEC	4.93344e-05
aggregated_scATAC_peak_60511	chr5	44079355	44079662	PeakInsideFeature	11346	1	ENSMUSG00000105264	Gm42716	processed_transcript	3.44241e-08
aggregated_scATAC_peak_60514	chr5	44151356	44151654	downstream	13525	1	ENSMUSG00000105263	Gm42427	TEC	9.03885e-06
aggregated_scATAC_peak_60627	chr5	52537083	52537327	upstream	1626	0	ENSMUSG00000104829	Gm43685	antisense_RNA	7.82742e-07
aggregated_scATAC_peak_60631	chr5	52596177	52596518	downstream	14274	1	ENSMUSG00000095078	Gm5866	processed_pseudogene	3.13059e-06
aggregated_scATAC_peak_60640	chr5	52762468	52763054	upstream	12648	1	ENSMUSG00000029179	Zcchc4	protein_coding	5.4196e-12
aggregated_scATAC_peak_60678	chr5	53379592	53379894	upstream	7969	1	ENSMUSG00000106808	Gm42745	lincRNA	9.97416e-06
aggregated_scATAC_peak_60681	chr5	53463096	53463667	upstream	2770	0	ENSMUSG00000039191	Rbpj	protein_coding	1.34673e-07
aggregated_scATAC_peak_60682	chr5	53469215	53469432	PeakInsideFeature	3172	1	ENSMUSG00000039191	Rbpj	protein_coding	3.30166e-06
aggregated_scATAC_peak_60745	chr5	63867256	63867859	NA	NA	0,1	NA	NA	NA	5.7995e-05
aggregated_scATAC_peak_60773	chr5	64251490	64251864	downstream	1548	0	ENSMUSG00000081143	Gm15823	processed_pseudogene	6.2032e-05
aggregated_scATAC_peak_60782	chr5	64345108	64345732	upstream	15094	1	ENSMUSG00000105730	Gm43838	lincRNA	3.64511e-07
aggregated_scATAC_peak_60787	chr5	64422906	64423647	upstream	10679	1	ENSMUSG00000105105	Gm31363	lincRNA	5.14946e-06
aggregated_scATAC_peak_60816	chr5	65028846	65029669	NA	NA	0,1	NA	NA	NA	1.50423e-07
aggregated_scATAC_peak_60819	chr5	65053200	65053950	downstream	38557	1	ENSMUSG00000037913	Tmem156	protein_coding	5.32439e-07
aggregated_scATAC_peak_60834	chr5	65348168	65348835	overlapStart	188	0	ENSMUSG00000029195	Klb	protein_coding	1.02303e-06
aggregated_scATAC_peak_60848	chr5	65495599	65495911	downstream	2659	0	ENSMUSG00000107195	4930589O11Rik	TEC	2.6564e-06
aggregated_scATAC_peak_60876	chr5	66052649	66053396	downstream	19873	1	ENSMUSG00000107304	Gm43775	TEC	3.14593e-08
aggregated_scATAC_peak_60877	chr5	66054467	66054781	downstream	18271	1	ENSMUSG00000107304	Gm43775	TEC	2.45577e-05
aggregated_scATAC_peak_60881	chr5	66081379	66082029	PeakInsideFeature	2762	0	ENSMUSG00000107390	Gm43323	TEC	7.61864e-07
aggregated_scATAC_peak_60886	chr5	66114204	66114641	upstream	29956	1	ENSMUSG00000107390	Gm43323	TEC	9.36886e-05
aggregated_scATAC_peak_60948	chr5	67100613	67100826	upstream	1419	0	ENSMUSG00000012520	Phox2b	protein_coding	1.3087e-05
aggregated_scATAC_peak_61024	chr5	72656304	72656700	PeakInsideFeature	8707	1	ENSMUSG00000067219	Nipal1	protein_coding	2.36258e-12
aggregated_scATAC_peak_61026	chr5	72764967	72765327	upstream	12370	1	ENSMUSG00000054892	Txk	protein_coding	2.87139e-06
aggregated_scATAC_peak_61028	chr5	72790049	72790688	downstream	21706	1	ENSMUSG00000106739	Gm43499	TEC	5.90545e-08
aggregated_scATAC_peak_61045	chr5	73119921	73120285	upstream	36911	1	ENSMUSG00000086376	1700071G01Rik	antisense_RNA	1.70402e-07
aggregated_scATAC_peak_61135	chr5	74702768	74703146	overlapStart	45	0	ENSMUSG00000029228	Lnx1	protein_coding	3.19338e-05
aggregated_scATAC_peak_61147	chr5	74860551	74861255	upstream	22432	1	ENSMUSG00000106806	Gm17906	processed_pseudogene	4.24264e-06
aggregated_scATAC_peak_61155	chr5	74932245	74932569	upstream	16783	1	ENSMUSG00000072874	Gm6116	lincRNA	2.08966e-06
aggregated_scATAC_peak_61186	chr5	75377076	75378062	upstream	5424	1	ENSMUSG00000088210	Gm22084	snRNA	8.77411e-05
aggregated_scATAC_peak_61196	chr5	75479077	75479349	NA	NA	0,1	NA	NA	NA	1.30762e-05
aggregated_scATAC_peak_61286	chr5	77384835	77385109	upstream	1627	0	ENSMUSG00000106828	Gm34648	antisense_RNA	5.31285e-05
aggregated_scATAC_peak_61294	chr5	77667162	77667815	downstream	2358	1	ENSMUSG00000089415	Gm22011	snoRNA	2.98362e-05
aggregated_scATAC_peak_61369	chr5	89653911	89654282	upstream	27820	1	ENSMUSG00000084500	Gm25320	misc_RNA	1.04287e-05
aggregated_scATAC_peak_61389	chr5	90490572	90490793	overlapStart	55	0	ENSMUSG00000054932	Afp	protein_coding	5.99837e-09
aggregated_scATAC_peak_61397	chr5	90640259	90640948	overlapStart	53	0	ENSMUSG00000029370	Rassf6	protein_coding	9.86417e-06
aggregated_scATAC_peak_61423	chr5	91532810	91533077	PeakInsideFeature	15329	1	ENSMUSG00000034981	Parm1	protein_coding	3.03644e-05
aggregated_scATAC_peak_61439	chr5	92102995	92103641	downstream	14965	1	ENSMUSG00000088949	Gm24931	rRNA	3.56251e-06
aggregated_scATAC_peak_61544	chr5	96222108	96222663	PeakInsideFeature	12893	1	ENSMUSG00000029486	Mrpl1	protein_coding	4.34213e-05
aggregated_scATAC_peak_61550	chr5	96412433	96413397	PeakInsideFeature	38960	1	ENSMUSG00000034687	Fras1	protein_coding	3.20773e-07
aggregated_scATAC_peak_61571	chr5	97056893	97057416	downstream	10973	1	ENSMUSG00000104591	Gm43145	TEC	2.31851e-07
aggregated_scATAC_peak_61584	chr5	97995992	97996316	downstream	4796	1	ENSMUSG00000105801	C430019N01Rik	TEC	2.02014e-07
aggregated_scATAC_peak_61585	chr5	97996463	97996830	downstream	4304	1	ENSMUSG00000105801	C430019N01Rik	TEC	2.85788e-09
aggregated_scATAC_peak_61604	chr5	98376434	98376673	downstream	30160	1	ENSMUSG00000104545	E030032P16Rik	TEC	1.1898e-05
aggregated_scATAC_peak_61616	chr5	99279082	99279659	overlapEnd	5275	1	ENSMUSG00000105686	Gm35394	lincRNA	7.8368e-09
aggregated_scATAC_peak_61617	chr5	99325442	99325658	NA	NA	0,1	NA	NA	NA	1.00832e-07
aggregated_scATAC_peak_61637	chr5	99683550	99684316	PeakInsideFeature	934	0	ENSMUSG00000029331	4930522N08Rik	antisense_RNA	1.63812e-05
aggregated_scATAC_peak_61727	chr5	101730022	101730873	upstream	26385	1	ENSMUSG00000105097	Gm42133	lincRNA	1.79515e-05
aggregated_scATAC_peak_61750	chr5	102310138	102311084	NA	NA	0,1	NA	NA	NA	3.24248e-05
aggregated_scATAC_peak_61762	chr5	102751562	102752610	NA	NA	0,1	NA	NA	NA	1.58318e-05
aggregated_scATAC_peak_61763	chr5	102768344	102769226	NA	NA	0,1	NA	NA	NA	7.62587e-08
aggregated_scATAC_peak_61766	chr5	102810478	102810840	NA	NA	0,1	NA	NA	NA	4.46591e-08
aggregated_scATAC_peak_61767	chr5	102813356	102813637	NA	NA	0,1	NA	NA	NA	1.08204e-06
aggregated_scATAC_peak_61768	chr5	102817662	102817962	NA	NA	0,1	NA	NA	NA	8.11148e-08
aggregated_scATAC_peak_61776	chr5	103193738	103194232	PeakInsideFeature	17349	1	ENSMUSG00000046709	Mapk10	protein_coding	2.51514e-06
aggregated_scATAC_peak_61799	chr5	103499125	103499775	downstream	33571	1	ENSMUSG00000104580	Gm42620	antisense_RNA	7.10084e-06
aggregated_scATAC_peak_61891	chr5	105800814	105801816	upstream	3602	0	ENSMUSG00000067058	Rps15a-ps5	processed_pseudogene	1.60116e-08
aggregated_scATAC_peak_61901	chr5	106016175	106016405	upstream	35108	1	ENSMUSG00000105129	Gm19566	processed_pseudogene	5.63052e-06
aggregated_scATAC_peak_61957	chr5	107067480	107068056	downstream	18932	1	ENSMUSG00000106554	Gm33474	lincRNA	2.73725e-08
aggregated_scATAC_peak_61962	chr5	107094227	107094834	downstream	41158	1	ENSMUSG00000106643	Gm43422	TEC	9.23051e-08
aggregated_scATAC_peak_62016	chr5	108017258	108017641	downstream	15190	1	ENSMUSG00000084855	Gm9850	processed_pseudogene	5.82647e-08
aggregated_scATAC_peak_62123	chr5	111048971	111049522	downstream	20694	1	ENSMUSG00000105890	Gm42780	TEC	6.0682e-09
aggregated_scATAC_peak_62126	chr5	111098754	111099333	NA	NA	0,1	NA	NA	NA	2.06632e-06
aggregated_scATAC_peak_62133	chr5	111175161	111175815	downstream	17177	1	ENSMUSG00000106153	Gm43677	TEC	1.0483e-06
aggregated_scATAC_peak_62135	chr5	111187036	111187344	upstream	9950	1	ENSMUSG00000105027	Gm43676	TEC	7.99628e-05
aggregated_scATAC_peak_62179	chr5	111543235	111543623	upstream	37993	1	ENSMUSG00000052848	C130026L21Rik	lincRNA	1.7001e-07
aggregated_scATAC_peak_62207	chr5	111790261	111791020	upstream	915	0	ENSMUSG00000105376	Gm36535	lincRNA	2.34567e-06
aggregated_scATAC_peak_62217	chr5	111917777	111918279	downstream	26207	1	ENSMUSG00000106060	Gm42488	lincRNA	1.71571e-05
aggregated_scATAC_peak_62285	chr5	112655528	112655860	downstream	6327	1	ENSMUSG00000105152	Gm42864	lincRNA	5.71963e-05
aggregated_scATAC_peak_62318	chr5	113122582	113123066	upstream	3360	0	ENSMUSG00000104576	F830115B05Rik	TEC	4.03531e-05
aggregated_scATAC_peak_62343	chr5	113299957	113300731	PeakInsideFeature	10442	1	ENSMUSG00000042216	Sgsm1	protein_coding	1.45981e-10
aggregated_scATAC_peak_62474	chr5	114589193	114589482	PeakInsideFeature	21322	1	ENSMUSG00000041930	Fam222a	protein_coding	1.45233e-05
aggregated_scATAC_peak_62495	chr5	114718913	114719467	upstream	325	0	ENSMUSG00000098656	Mir7028	miRNA	1.03371e-06
aggregated_scATAC_peak_62608	chr5	116208834	116209312	upstream	34633	1	ENSMUSG00000086122	Gm14507	antisense_RNA	1.41707e-06
aggregated_scATAC_peak_62723	chr5	118052049	118052605	upstream	13033	1	ENSMUSG00000029360	Gm9754	antisense_RNA	1.16981e-07
aggregated_scATAC_peak_62749	chr5	118302607	118303170	downstream	36439	1	ENSMUSG00000095477	Gm25076	snoRNA	3.57142e-05
aggregated_scATAC_peak_62814	chr5	118847020	118847736	downstream	30087	1	ENSMUSG00000106708	Gm43782	lincRNA	2.87357e-06
aggregated_scATAC_peak_62826	chr5	119052106	119052957	NA	NA	0,1	NA	NA	NA	1.54331e-05
aggregated_scATAC_peak_62828	chr5	119069801	119070072	upstream	38298	1	ENSMUSG00000100573	1700081H04Rik	lincRNA	8.00344e-06
aggregated_scATAC_peak_62834	chr5	119135475	119135779	downstream	27393	1	ENSMUSG00000100573	1700081H04Rik	lincRNA	5.80046e-06
aggregated_scATAC_peak_62837	chr5	119178533	119179404	downstream	21050	1	ENSMUSG00000107334	Gm7538	lincRNA	5.95098e-08
aggregated_scATAC_peak_62868	chr5	119580174	119580799	downstream	17718	1	ENSMUSG00000106991	Gm43399	TEC	4.20692e-05
aggregated_scATAC_peak_62887	chr5	119668075	119668342	upstream	2461	0	ENSMUSG00000018604	Tbx3	protein_coding	8.69702e-07
aggregated_scATAC_peak_62918	chr5	119927024	119927365	downstream	12256	1	ENSMUSG00000107084	Gm43269	lincRNA	4.446e-07
aggregated_scATAC_peak_62965	chr5	120315053	120315693	downstream	27647	1	ENSMUSG00000080412	Gm26474	miRNA	1.65917e-06
aggregated_scATAC_peak_63031	chr5	120861148	120861599	overlapStart	47	0	ENSMUSG00000001168	Oas1h	protein_coding	8.4724e-07
aggregated_scATAC_peak_63194	chr5	122982268	122982738	upstream	6851	1	ENSMUSG00000056735	A930024E05Rik	antisense_RNA	6.19452e-10
aggregated_scATAC_peak_63230	chr5	123184180	123184708	upstream	1717	0	ENSMUSG00000029445	Hpd	protein_coding	7.15256e-06
aggregated_scATAC_peak_63262	chr5	123593264	123593758	upstream	20473	1	ENSMUSG00000029434	Vps33a	protein_coding	5.02678e-09
aggregated_scATAC_peak_63280	chr5	123854103	123854892	downstream	11001	1	ENSMUSG00000045502	Hcar2	protein_coding	2.69806e-09
aggregated_scATAC_peak_63321	chr5	124236278	124236530	upstream	1320	0	ENSMUSG00000105759	Gm42425	antisense_RNA	1.14702e-05
aggregated_scATAC_peak_63340	chr5	124498908	124499457	downstream	16048	1	ENSMUSG00000029402	Snrnp35	protein_coding	1.28753e-05
aggregated_scATAC_peak_63580	chr5	129621440	129621655	downstream	2323	1	ENSMUSG00000057244	Gm6139	processed_pseudogene	2.04558e-05
aggregated_scATAC_peak_63646	chr5	131581820	131582025	downstream	3935	1	ENSMUSG00000099255	Gm27266	rRNA	9.82001e-06
aggregated_scATAC_peak_63660	chr5	131775235	131775736	NA	NA	0,1	NA	NA	NA	4.11333e-05
aggregated_scATAC_peak_63678	chr5	132273268	132274270	NA	NA	0,1	NA	NA	NA	1.79457e-05
aggregated_scATAC_peak_63715	chr5	133712765	133713064	NA	NA	0,1	NA	NA	NA	5.56508e-05
aggregated_scATAC_peak_63716	chr5	133753729	133754685	NA	NA	0,1	NA	NA	NA	8.46193e-05
aggregated_scATAC_peak_63930	chr5	136581644	136582056	upstream	14360	1	ENSMUSG00000029705	Cux1	protein_coding	1.05487e-05
aggregated_scATAC_peak_63992	chr5	137277357	137278273	upstream	9704	1	ENSMUSG00000023328	Ache	protein_coding	4.02728e-08
aggregated_scATAC_peak_64015	chr5	137455450	137456452	PeakInsideFeature	21113	1	ENSMUSG00000079173	Zan	protein_coding	6.18099e-07
aggregated_scATAC_peak_64074	chr5	138754093	138755359	overlapStart	212	0	ENSMUSG00000025854	Fam20c	protein_coding	8.43457e-07
aggregated_scATAC_peak_64092	chr5	138981818	138982087	upstream	13104	1	ENSMUSG00000075585	6330403L08Rik	antisense_RNA	4.80373e-05
aggregated_scATAC_peak_64098	chr5	139020546	139020944	upstream	23375	1	ENSMUSG00000025856	Pdgfa	protein_coding	2.04228e-08
aggregated_scATAC_peak_64111	chr5	139129065	139130078	PeakInsideFeature	20429	1	ENSMUSG00000025855	Prkar1b	protein_coding	7.52725e-05
aggregated_scATAC_peak_64134	chr5	139418652	139419388	upstream	4131	0	ENSMUSG00000053647	Gper1	protein_coding	9.05302e-05
aggregated_scATAC_peak_64144	chr5	139498872	139499107	upstream	14441	1	ENSMUSG00000053581	Zfand2a	protein_coding	4.28896e-05
aggregated_scATAC_peak_64304	chr5	141613261	141613839	PeakInsideFeature	2452	0	ENSMUSG00000085540	Gm16036	antisense_RNA	3.26534e-06
aggregated_scATAC_peak_64306	chr5	141749541	141749821	NA	NA	0,1	NA	NA	NA	7.9315e-08
aggregated_scATAC_peak_64309	chr5	141857827	141858125	NA	NA	0,1	NA	NA	NA	1.7927e-08
aggregated_scATAC_peak_64310	chr5	141858432	141858919	NA	NA	0,1	NA	NA	NA	8.65856e-06
aggregated_scATAC_peak_64312	chr5	141949540	141949878	NA	NA	0,1	NA	NA	NA	5.12966e-05
aggregated_scATAC_peak_64332	chr5	142417954	142418200	PeakInsideFeature	16580	1	ENSMUSG00000056493	Foxk1	protein_coding	6.14396e-05
aggregated_scATAC_peak_64343	chr5	142500964	142501245	downstream	28972	1	ENSMUSG00000074817	Papolb	protein_coding	4.14907e-07
aggregated_scATAC_peak_64404	chr5	143213941	143214215	downstream	12812	1	ENSMUSG00000039296	Spdye4a	protein_coding	1.8549e-06
aggregated_scATAC_peak_64446	chr5	143984509	143984837	upstream	3682	0	ENSMUSG00000091351	Gm17135	antisense_RNA	5.66271e-06
aggregated_scATAC_peak_64540	chr5	146611006	146611640	upstream	11221	1	ENSMUSG00000105907	Gm34333	lincRNA	6.86084e-10
aggregated_scATAC_peak_64544	chr5	146682894	146683580	upstream	23385	1	ENSMUSG00000106020	4930573C15Rik	lincRNA	1.30444e-10
aggregated_scATAC_peak_64545	chr5	146687634	146688286	upstream	18662	1	ENSMUSG00000106020	4930573C15Rik	lincRNA	9.4974e-10
aggregated_scATAC_peak_64546	chr5	146692429	146693251	upstream	13782	1	ENSMUSG00000106020	4930573C15Rik	lincRNA	5.07189e-08
aggregated_scATAC_peak_64549	chr5	146767308	146767516	PeakInsideFeature	27594	1	ENSMUSG00000029640	Usp12	protein_coding	9.68909e-05
aggregated_scATAC_peak_64550	chr5	146772020	146772328	PeakInsideFeature	22832	1	ENSMUSG00000029640	Usp12	protein_coding	3.57092e-06
aggregated_scATAC_peak_64562	chr5	146912116	146912669	upstream	36265	1	ENSMUSG00000016503	Gtf3a	protein_coding	5.0104e-06
aggregated_scATAC_peak_64571	chr5	146993768	146994066	upstream	30117	1	ENSMUSG00000016510	Mtif3	protein_coding	1.46999e-05
aggregated_scATAC_peak_64589	chr5	147269902	147270565	overlapStart	275	0	ENSMUSG00000029644	Pdx1	protein_coding	3.29405e-05
aggregated_scATAC_peak_64597	chr5	147306411	147307597	overlapStart	266	0	ENSMUSG00000029646	Cdx2	protein_coding	8.70271e-06
aggregated_scATAC_peak_64641	chr5	147913247	147913751	upstream	18684	1	ENSMUSG00000029650	Slc46a3	protein_coding	6.25252e-05
aggregated_scATAC_peak_64645	chr5	147963872	147964556	PeakInsideFeature	6894	1	ENSMUSG00000029651	Mtus2	protein_coding	3.1569e-05
aggregated_scATAC_peak_64669	chr5	148598365	148598710	downstream	15106	1	ENSMUSG00000107098	Gm29815	processed_pseudogene	6.31598e-05
aggregated_scATAC_peak_64678	chr5	148740678	148741302	upstream	850	0	ENSMUSG00000086494	2210417A02Rik	lincRNA	2.98037e-07
aggregated_scATAC_peak_64772	chr5	149873437	149874029	upstream	2324	0	ENSMUSG00000107279	Gm43450	lincRNA	1.44909e-05
aggregated_scATAC_peak_64859	chr6	3988792	3989207	overlapStart	81	0	ENSMUSG00000029664	Tfpi2	protein_coding	8.74488e-05
aggregated_scATAC_peak_64885	chr6	4723382	4724480	PeakInsideFeature	23276	1	ENSMUSG00000004631	Sgce	protein_coding	3.09973e-07
aggregated_scATAC_peak_64910	chr6	5171445	5171749	PeakInsideFeature	22349	1	ENSMUSG00000002588	Pon1	protein_coding	5.67938e-09
aggregated_scATAC_peak_64941	chr6	6070079	6070722	NA	NA	0,1	NA	NA	NA	2.36953e-05
aggregated_scATAC_peak_64944	chr6	6149826	6150202	NA	NA	0,1	NA	NA	NA	2.25747e-07
aggregated_scATAC_peak_64973	chr6	7519316	7519877	upstream	21358	1	ENSMUSG00000107493	Gm44048	processed_pseudogene	1.85941e-06
aggregated_scATAC_peak_65025	chr6	12812056	12812466	upstream	45136	1	ENSMUSG00000083620	Gm15529	processed_pseudogene	5.22829e-05
aggregated_scATAC_peak_65084	chr6	17589354	17590191	upstream	46462	1	ENSMUSG00000015733	Capza2	protein_coding	3.23154e-05
aggregated_scATAC_peak_65104	chr6	18248492	18248843	downstream	40380	1	ENSMUSG00000087389	Gm15592	antisense_RNA	8.13279e-12
aggregated_scATAC_peak_65144	chr6	22280663	22280892	upstream	7449	1	ENSMUSG00000029671	Wnt16	protein_coding	6.30226e-07
aggregated_scATAC_peak_65210	chr6	28464528	28465070	downstream	2182	1	ENSMUSG00000107130	Gm43264	unprocessed_pseudogene	4.22389e-05
aggregated_scATAC_peak_65228	chr6	28853828	28854193	upstream	22263	1	ENSMUSG00000049939	Lrrc4	protein_coding	1.47644e-05
aggregated_scATAC_peak_65312	chr6	30013537	30013896	downstream	25328	1	ENSMUSG00000095989	Gm23049	miRNA	8.44186e-05
aggregated_scATAC_peak_65399	chr6	31129192	31129506	downstream	13314	1	ENSMUSG00000086922	Gm13835	processed_pseudogene	3.01028e-05
aggregated_scATAC_peak_65430	chr6	31599516	31600147	upstream	5358	1	ENSMUSG00000086804	Gm43154	lincRNA	2.67011e-05
aggregated_scATAC_peak_65489	chr6	33227489	33227794	downstream	20457	1	ENSMUSG00000082217	Gm1401	processed_pseudogene	8.30716e-05
aggregated_scATAC_peak_65493	chr6	33440511	33441153	downstream	7824	1	ENSMUSG00000107358	Gm43168	TEC	9.69412e-07
aggregated_scATAC_peak_65641	chr6	37572998	37573222	downstream	31696	1	ENSMUSG00000106889	Gm7463	processed_pseudogene	3.13059e-06
aggregated_scATAC_peak_65646	chr6	37596965	37597851	NA	NA	0,1	NA	NA	NA	3.21824e-06
aggregated_scATAC_peak_65648	chr6	37681205	37681664	downstream	5761	1	ENSMUSG00000107035	Ybx1-ps2	processed_pseudogene	1.53484e-06
aggregated_scATAC_peak_65656	chr6	37934416	37934791	NA	NA	0,1	NA	NA	NA	3.0521e-07
aggregated_scATAC_peak_65666	chr6	38120691	38121375	downstream	2650	0	ENSMUSG00000087924	Gm23231	snRNA	6.78126e-06
aggregated_scATAC_peak_65667	chr6	38144106	38144735	upstream	19834	1	ENSMUSG00000038600	Atp6v0a4	protein_coding	7.29289e-07
aggregated_scATAC_peak_65677	chr6	38263936	38264145	upstream	10031	1	ENSMUSG00000063455	D630045J12Rik	protein_coding	2.4127e-05
aggregated_scATAC_peak_65738	chr6	39345344	39346106	PeakInsideFeature	31950	1	ENSMUSG00000029924	Slc37a3	protein_coding	1.08599e-09
aggregated_scATAC_peak_65911	chr6	48465109	48465621	PeakInsideFeature	17136	1	ENSMUSG00000029797	Sspo	protein_coding	6.38537e-07
aggregated_scATAC_peak_65928	chr6	48665931	48666628	upstream	420	0	ENSMUSG00000108117	Gm44262	processed_pseudogene	5.60809e-06
aggregated_scATAC_peak_65933	chr6	48741401	48742219	overlapStart	366	0	ENSMUSG00000044867	Gimap1os	processed_transcript	7.05252e-05
aggregated_scATAC_peak_65941	chr6	48914396	48914596	upstream	15399	1	ENSMUSG00000029813	1600015I10Rik	protein_coding	3.08943e-11
aggregated_scATAC_peak_65957	chr6	49165120	49165535	upstream	7431	1	ENSMUSG00000107727	Gm18010	processed_pseudogene	1.24901e-05
aggregated_scATAC_peak_65963	chr6	49225358	49225959	upstream	10701	1	ENSMUSG00000029814	Igf2bp3	protein_coding	2.53155e-06
aggregated_scATAC_peak_66011	chr6	50520032	50520468	downstream	19784	1	ENSMUSG00000077357	Gm26289	snoRNA	9.9306e-06
aggregated_scATAC_peak_66015	chr6	50552991	50553259	upstream	13091	1	ENSMUSG00000077357	Gm26289	snoRNA	2.52769e-05
aggregated_scATAC_peak_66099	chr6	51657625	51658293	downstream	36327	1	ENSMUSG00000094528	Gm22914	miRNA	8.87192e-06
aggregated_scATAC_peak_66138	chr6	52177010	52177602	overlapStart	192	0	ENSMUSG00000056468	5730596B20Rik	protein_coding	2.18599e-07
aggregated_scATAC_peak_66139	chr6	52183134	52183628	PeakInsideFeature	271	0	ENSMUSG00000101451	Gm29430	antisense_RNA	1.32089e-05
aggregated_scATAC_peak_66140	chr6	52190580	52191622	PeakInsideFeature	652	0	ENSMUSG00000000942	Hoxa4	protein_coding	1.05109e-05
aggregated_scATAC_peak_66149	chr6	52221443	52222620	overlapStart	178	0	ENSMUSG00000038236	Hoxa7	protein_coding	6.20405e-07
aggregated_scATAC_peak_66153	chr6	52240401	52241073	overlapStart	117	0	ENSMUSG00000000938	Hoxa10	protein_coding	7.39008e-06
aggregated_scATAC_peak_66180	chr6	52482027	52482573	upstream	10151	1	ENSMUSG00000107895	1700094M24Rik	lincRNA	1.36795e-06
aggregated_scATAC_peak_66189	chr6	52601552	52602491	PeakInsideFeature	1223	0	ENSMUSG00000107813	Gm44434	TEC	4.59219e-08
aggregated_scATAC_peak_66435	chr6	62620434	62620922	upstream	9903	1	ENSMUSG00000107957	Gm44088	processed_pseudogene	4.81263e-05
aggregated_scATAC_peak_66477	chr6	66910415	66910914	upstream	14143	1	ENSMUSG00000053442	4930597O21Rik	processed_transcript	1.64828e-05
aggregated_scATAC_peak_66569	chr6	71237083	71237283	upstream	34488	1	ENSMUSG00000098623	Mir8112	miRNA	1.63723e-05
aggregated_scATAC_peak_66577	chr6	71454040	71454378	PeakInsideFeature	2217	1	ENSMUSG00000108213	Gm44172	lincRNA	5.23883e-06
aggregated_scATAC_peak_66603	chr6	72117375	72117842	downstream	5589	1	ENSMUSG00000108709	4933431G14Rik	antisense_RNA	8.82185e-07
aggregated_scATAC_peak_66641	chr6	72465485	72466058	upstream	26214	1	ENSMUSG00000053907	Mat2a	protein_coding	2.08774e-11
aggregated_scATAC_peak_66656	chr6	72619917	72620174	upstream	3046	0	ENSMUSG00000056429	Tgoln1	protein_coding	4.33594e-06
aggregated_scATAC_peak_66701	chr6	73232097	73232491	downstream	9244	1	ENSMUSG00000107440	Gm40377	TEC	1.42775e-05
aggregated_scATAC_peak_66722	chr6	78840310	78840588	NA	NA	0,1	NA	NA	NA	6.78382e-12
aggregated_scATAC_peak_66724	chr6	79054645	79055241	downstream	6827	1	ENSMUSG00000107772	Gm5311	processed_pseudogene	7.23702e-06
aggregated_scATAC_peak_66779	chr6	82883526	82884049	upstream	1935	0	ENSMUSG00000100291	2310069B03Rik	lincRNA	1.44199e-08
aggregated_scATAC_peak_66845	chr6	83482324	83483066	upstream	23611	1	ENSMUSG00000034832	Tet3	protein_coding	7.68775e-06
aggregated_scATAC_peak_66991	chr6	85869307	85869562	upstream	276	0	ENSMUSG00000033634	Nat8f2	protein_coding	3.08647e-05
aggregated_scATAC_peak_67050	chr6	86678387	86678604	PeakInsideFeature	6026	1	ENSMUSG00000001158	Snrnp27	protein_coding	6.29998e-05
aggregated_scATAC_peak_67080	chr6	87248621	87248821	downstream	6887	1	ENSMUSG00000107865	Gm44417	TEC	4.52518e-06
aggregated_scATAC_peak_67082	chr6	87270509	87270887	upstream	7047	1	ENSMUSG00000108006	Gm44418	antisense_RNA	6.68892e-05
aggregated_scATAC_peak_67097	chr6	87478939	87479936	NA	NA	0,1	NA	NA	NA	2.38448e-05
aggregated_scATAC_peak_67133	chr6	88048967	88049358	upstream	3892	0	ENSMUSG00000079477	Rab7	protein_coding	8.75714e-09
aggregated_scATAC_peak_67161	chr6	88352677	88352959	downstream	788	0	ENSMUSG00000107472	Gm44265	sense_intronic	8.87934e-05
aggregated_scATAC_peak_67223	chr6	89281474	89282143	PeakInsideFeature	3917	0	ENSMUSG00000107622	4930512J16Rik	lincRNA	8.23101e-05
aggregated_scATAC_peak_67343	chr6	91565996	91566797	upstream	28362	1	ENSMUSG00000108335	Gm45215	processed_pseudogene	8.85694e-05
aggregated_scATAC_peak_67366	chr6	91746023	91746572	upstream	33020	1	ENSMUSG00000108574	Gm44981	TEC	3.1024e-06
aggregated_scATAC_peak_67447	chr6	93180663	93181767	upstream	13726	1	ENSMUSG00000108256	Gm43923	TEC	3.69618e-06
aggregated_scATAC_peak_67463	chr6	93623276	93623709	downstream	26733	1	ENSMUSG00000107739	Gm7812	processed_pseudogene	1.3556e-06
aggregated_scATAC_peak_67475	chr6	93987451	93988059	NA	NA	0,1	NA	NA	NA	2.44701e-07
aggregated_scATAC_peak_67482	chr6	94130428	94130711	NA	NA	0,1	NA	NA	NA	8.8086e-05
aggregated_scATAC_peak_67489	chr6	94190933	94191144	NA	NA	0,1	NA	NA	NA	9.76858e-06
aggregated_scATAC_peak_67497	chr6	94257064	94257752	PeakInsideFeature	26509	1	ENSMUSG00000045095	Magi1	protein_coding	5.33899e-08
aggregated_scATAC_peak_67608	chr6	97666455	97667369	upstream	49371	1	ENSMUSG00000030064	Frmd4b	protein_coding	2.80244e-06
aggregated_scATAC_peak_67621	chr6	98402872	98403145	NA	NA	0,1	NA	NA	NA	9.5519e-06
aggregated_scATAC_peak_67689	chr6	99532522	99532832	upstream	9956	1	ENSMUSG00000030067	Foxp1	protein_coding	9.43034e-07
aggregated_scATAC_peak_67764	chr6	100452200	100452976	downstream	42226	1	ENSMUSG00000087929	Gm23234	snoRNA	8.26309e-05
aggregated_scATAC_peak_67793	chr6	101102030	101102323	upstream	42116	1	ENSMUSG00000107954	Gm43942	TEC	3.67596e-06
aggregated_scATAC_peak_67803	chr6	101271625	101272481	downstream	16457	1	ENSMUSG00000108076	9530086O07Rik	TEC	5.83385e-05
aggregated_scATAC_peak_67899	chr6	112273384	112274007	overlapStart	62	0	ENSMUSG00000057604	Lmcd1	protein_coding	5.7692e-05
aggregated_scATAC_peak_67915	chr6	112553602	112553865	upstream	9908	1	ENSMUSG00000083443	Gm15519	processed_pseudogene	1.2062e-05
aggregated_scATAC_peak_67916	chr6	112620099	112620401	downstream	14706	1	ENSMUSG00000029633	Gm5578	processed_pseudogene	4.77812e-11
aggregated_scATAC_peak_67956	chr6	113404602	113405293	upstream	11524	1	ENSMUSG00000107944	Gm44280	TEC	1.718e-05
aggregated_scATAC_peak_68000	chr6	114012605	114013420	PeakInsideFeature	8223	1	ENSMUSG00000087083	Gm15083	antisense_RNA	1.15307e-08
aggregated_scATAC_peak_68004	chr6	114074164	114074580	downstream	12176	1	ENSMUSG00000107474	Gm43932	processed_pseudogene	3.66849e-09
aggregated_scATAC_peak_68057	chr6	114800315	114801112	downstream	11324	1	ENSMUSG00000107395	Gm44331	processed_pseudogene	8.20568e-06
aggregated_scATAC_peak_68109	chr6	115650918	115651511	upstream	12155	1	ENSMUSG00000081805	Gm14335	processed_pseudogene	3.16698e-06
aggregated_scATAC_peak_68110	chr6	115651859	115652064	upstream	12903	1	ENSMUSG00000081805	Gm14335	processed_pseudogene	7.06706e-06
aggregated_scATAC_peak_68113	chr6	115700799	115701258	downstream	22804	1	ENSMUSG00000088358	Gm24008	snoRNA	2.32688e-07
aggregated_scATAC_peak_68160	chr6	116385618	116386456	upstream	3425	0	ENSMUSG00000107556	Gm44237	TEC	3.43833e-07
aggregated_scATAC_peak_68171	chr6	116716604	116717039	overlapStart	91	0	ENSMUSG00000048108	Tmem72	protein_coding	5.73361e-06
aggregated_scATAC_peak_68181	chr6	116962285	116962496	downstream	8871	1	ENSMUSG00000108225	Gm43926	processed_pseudogene	9.76638e-08
aggregated_scATAC_peak_68185	chr6	117031906	117032838	NA	NA	0,1	NA	NA	NA	1.24422e-09
aggregated_scATAC_peak_68188	chr6	117106566	117107104	upstream	37490	1	ENSMUSG00000107903	Gm43930	TEC	1.26646e-09
aggregated_scATAC_peak_68205	chr6	117406845	117407759	downstream	16315	1	ENSMUSG00000107434	Gm4640	lincRNA	3.6491e-06
aggregated_scATAC_peak_68248	chr6	118331773	118331973	upstream	23489	1	ENSMUSG00000107933	Gm30498	lincRNA	3.36445e-07
aggregated_scATAC_peak_68272	chr6	118989983	118990422	NA	NA	0,1	NA	NA	NA	5.7251e-05
aggregated_scATAC_peak_68298	chr6	119383174	119383564	PeakInsideFeature	34335	1	ENSMUSG00000030168	Adipor2	protein_coding	1.23044e-06
aggregated_scATAC_peak_68322	chr6	119739030	119739340	NA	NA	0,1	NA	NA	NA	9.71725e-06
aggregated_scATAC_peak_68353	chr6	120254652	120255448	upstream	39314	1	ENSMUSG00000097481	D330020A13Rik	protein_coding	4.78198e-08
aggregated_scATAC_peak_68361	chr6	120318135	120318998	upstream	24007	1	ENSMUSG00000041372	B4galnt3	protein_coding	5.91437e-06
aggregated_scATAC_peak_68375	chr6	120591559	120592775	upstream	11991	1	ENSMUSG00000107580	Gm44124	TEC	4.1611e-07
aggregated_scATAC_peak_68389	chr6	120782017	120782621	PeakInsideFeature	8741	1	ENSMUSG00000004902	Slc25a18	protein_coding	3.63956e-05
aggregated_scATAC_peak_68394	chr6	120850217	120851253	PeakInsideFeature	14523	1	ENSMUSG00000009112	Bcl2l13	protein_coding	1.50443e-05
aggregated_scATAC_peak_68423	chr6	121165965	121166569	upstream	17400	1	ENSMUSG00000067825	Pex26	protein_coding	1.29794e-05
aggregated_scATAC_peak_68478	chr6	122663680	122664145	upstream	32089	1	ENSMUSG00000072789	Gm10420	processed_pseudogene	7.82742e-07
aggregated_scATAC_peak_68568	chr6	125060214	125060655	upstream	7486	1	ENSMUSG00000067714	Lpar5	protein_coding	2.7003e-05
aggregated_scATAC_peak_68699	chr6	127307360	127308101	overlapStart	237	0	ENSMUSG00000107153	Gm38404	lincRNA	1.27013e-05
aggregated_scATAC_peak_68701	chr6	127335486	127335770	upstream	9771	1	ENSMUSG00000106843	Gm42458	TEC	8.375e-08
aggregated_scATAC_peak_68917	chr6	135029259	135029959	downstream	17997	1	ENSMUSG00000030204	Ddx47	protein_coding	2.41088e-06
aggregated_scATAC_peak_68948	chr6	135351630	135351966	upstream	2049	0	ENSMUSG00000082691	Dynlt1-ps1	processed_pseudogene	7.09613e-09
aggregated_scATAC_peak_68953	chr6	135385821	135386323	downstream	23527	1	ENSMUSG00000030208	Emp1	protein_coding	8.28763e-05
aggregated_scATAC_peak_68994	chr6	136781627	136781828	overlapStart	37	0	ENSMUSG00000042638	Gucy2c	protein_coding	2.14199e-08
aggregated_scATAC_peak_69053	chr6	139596483	139596725	PeakInsideFeature	9383	1	ENSMUSG00000030228	Pik3c2g	protein_coding	2.56339e-06
aggregated_scATAC_peak_69061	chr6	140187205	140187545	upstream	20730	1	ENSMUSG00000089558	Gm24174	rRNA	1.16892e-08
aggregated_scATAC_peak_69095	chr6	141015131	141015384	upstream	6973	1	ENSMUSG00000107613	Gm43927	processed_pseudogene	3.12116e-06
aggregated_scATAC_peak_69105	chr6	141293196	141293775	upstream	43477	1	ENSMUSG00000100707	Gm28523	antisense_RNA	2.03559e-09
aggregated_scATAC_peak_69106	chr6	141310407	141310685	upstream	30007	1	ENSMUSG00000107456	Gm10400	TEC	5.62729e-06
aggregated_scATAC_peak_69124	chr6	142475118	142475424	upstream	2162	0	ENSMUSG00000030244	Gys2	protein_coding	1.61521e-05
aggregated_scATAC_peak_69191	chr6	144361005	144361943	NA	NA	0,1	NA	NA	NA	1.57774e-07
aggregated_scATAC_peak_69193	chr6	144398151	144398429	NA	NA	0,1	NA	NA	NA	5.97239e-05
aggregated_scATAC_peak_69198	chr6	144491816	144492427	PeakInsideFeature	10897	1	ENSMUSG00000087157	Sox5os2	antisense_RNA	6.33436e-06
aggregated_scATAC_peak_69203	chr6	144620846	144621756	NA	NA	0,1	NA	NA	NA	4.34302e-08
aggregated_scATAC_peak_69302	chr6	146460918	146461444	downstream	2426	1	ENSMUSG00000082120	Gm15720	processed_pseudogene	1.37069e-05
aggregated_scATAC_peak_69334	chr6	146978975	146980287	downstream	14393	1	ENSMUSG00000107969	Gm44085	antisense_RNA	9.39752e-08
aggregated_scATAC_peak_69363	chr6	148373458	148373912	upstream	9029	1	ENSMUSG00000108035	Gm44021	TEC	1.57384e-05
aggregated_scATAC_peak_69393	chr6	149051400	149051693	downstream	1077	0	ENSMUSG00000065664	Gm22578	snRNA	2.72713e-05
aggregated_scATAC_peak_69549	chr7	6308022	6308315	downstream	21589	1	ENSMUSG00000054893	Zfp667	protein_coding	2.30007e-05
aggregated_scATAC_peak_69576	chr7	6837840	6838713	downstream	1845	0	ENSMUSG00000092875	Gm22649	misc_RNA	4.12097e-05
aggregated_scATAC_peak_69790	chr7	19007074	19007324	downstream	3155	1	ENSMUSG00000044030	Irf2bp1	protein_coding	5.49417e-08
aggregated_scATAC_peak_69791	chr7	19007461	19007929	downstream	3651	1	ENSMUSG00000044030	Irf2bp1	protein_coding	3.316e-09
aggregated_scATAC_peak_69866	chr7	19547188	19547834	PeakInsideFeature	15565	1	ENSMUSG00000051403	Ppp1r37	protein_coding	3.49999e-09
aggregated_scATAC_peak_70060	chr7	25509921	25510885	downstream	29454	1	ENSMUSG00000054385	Ceacam2	protein_coding	1.18332e-07
aggregated_scATAC_peak_70229	chr7	28540524	28540896	overlapStart	175	0	ENSMUSG00000084174	Sycn	protein_coding	4.72297e-08
aggregated_scATAC_peak_70260	chr7	28803893	28804277	upstream	4456	0	ENSMUSG00000015165	Hnrnpl	protein_coding	3.61643e-07
aggregated_scATAC_peak_70279	chr7	28923752	28924357	PeakInsideFeature	19474	1	ENSMUSG00000109314	Gm44699	sense_intronic	5.2635e-07
aggregated_scATAC_peak_70388	chr7	30192804	30193370	upstream	867	0	ENSMUSG00000097817	Gm26810	antisense_RNA	5.63705e-06
aggregated_scATAC_peak_70443	chr7	30612674	30613148	overlapStart	64	0	ENSMUSG00000006313	Upk1a	protein_coding	1.90538e-08
aggregated_scATAC_peak_70464	chr7	30812188	30812792	downstream	11285	1	ENSMUSG00000051314	Ffar2	protein_coding	8.07293e-05
aggregated_scATAC_peak_70495	chr7	31145444	31146249	upstream	3682	0	ENSMUSG00000097149	G630030J09Rik	antisense_RNA	1.23044e-06
aggregated_scATAC_peak_70549	chr7	34919205	34919442	PeakInsideFeature	6945	1	ENSMUSG00000063931	Pepd	protein_coding	2.83966e-06
aggregated_scATAC_peak_70552	chr7	34967498	34967934	upstream	23731	1	ENSMUSG00000077469	Gm25922	snoRNA	2.63151e-05
aggregated_scATAC_peak_70565	chr7	35134736	35135315	overlapEnd	6423	1	ENSMUSG00000108575	Gm35665	lincRNA	9.21774e-05
aggregated_scATAC_peak_70566	chr7	35143826	35144405	upstream	2667	0	ENSMUSG00000108575	Gm35665	lincRNA	5.88273e-09
aggregated_scATAC_peak_70591	chr7	35372555	35372892	downstream	24112	1	ENSMUSG00000030493	Faap24	protein_coding	4.96812e-06
aggregated_scATAC_peak_70625	chr7	35948235	35949122	NA	NA	0,1	NA	NA	NA	2.66579e-05
aggregated_scATAC_peak_70630	chr7	36016918	36017397	NA	NA	0,1	NA	NA	NA	5.22609e-05
aggregated_scATAC_peak_70678	chr7	37549940	37550291	upstream	32262	1	ENSMUSG00000108330	Gm44882	TEC	5.33197e-09
aggregated_scATAC_peak_70744	chr7	40683487	40683705	PeakInsideFeature	8859	1	ENSMUSG00000102004	4933402C06Rik	lincRNA	8.6729e-05
aggregated_scATAC_peak_70993	chr7	45677363	45678090	upstream	6296	1	ENSMUSG00000070564	Ntn5	protein_coding	8.79773e-13
aggregated_scATAC_peak_71049	chr7	46122807	46123490	overlapStart	204	0	ENSMUSG00000110240	Gm45486	antisense_RNA	3.31315e-11
aggregated_scATAC_peak_71059	chr7	46235993	46236611	PeakInsideFeature	2201	0	ENSMUSG00000030838	Ush1c	protein_coding	1.55793e-06
aggregated_scATAC_peak_71071	chr7	46393054	46393480	upstream	3230	0	ENSMUSG00000058975	Kcnc1	protein_coding	7.81936e-06
aggregated_scATAC_peak_71076	chr7	46459458	46460278	downstream	9455	1	ENSMUSG00000094229	Gm22969	snRNA	1.32194e-13
aggregated_scATAC_peak_71179	chr7	49506049	49506813	downstream	36719	1	ENSMUSG00000102148	Gm38059	TEC	7.04207e-10
aggregated_scATAC_peak_71213	chr7	49880090	49880594	upstream	22742	1	ENSMUSG00000097864	Gm26856	lincRNA	1.05877e-06
aggregated_scATAC_peak_71225	chr7	50105581	50106320	NA	NA	0,1	NA	NA	NA	8.03498e-05
aggregated_scATAC_peak_71229	chr7	50910692	50910975	downstream	32320	1	ENSMUSG00000109409	Gm9343	processed_pseudogene	5.46777e-06
aggregated_scATAC_peak_71243	chr7	54652102	54652389	upstream	41048	1	ENSMUSG00000109050	Gm6290	processed_pseudogene	9.46186e-09
aggregated_scATAC_peak_71298	chr7	61695009	61695435	upstream	9871	1	ENSMUSG00000096893	Mir344d-2	miRNA	2.2855e-05
aggregated_scATAC_peak_71360	chr7	64312871	64313134	upstream	24792	1	ENSMUSG00000108472	Gm45212	TEC	6.92917e-05
aggregated_scATAC_peak_71405	chr7	65469620	65470197	downstream	11313	1	ENSMUSG00000108533	Gm44792	TEC	1.5706e-05
aggregated_scATAC_peak_71411	chr7	65507158	65507725	PeakInsideFeature	20339	1	ENSMUSG00000030516	Tjp1	protein_coding	2.3599e-10
aggregated_scATAC_peak_71457	chr7	66347245	66347660	upstream	18453	1	ENSMUSG00000078677	Gm10974	protein_coding	1.46999e-05
aggregated_scATAC_peak_71474	chr7	66544393	66545486	downstream	20685	1	ENSMUSG00000109330	Gm44754	processed_pseudogene	8.13412e-06
aggregated_scATAC_peak_71485	chr7	66780101	66780713	PeakInsideFeature	36903	1	ENSMUSG00000030510	Cers3	protein_coding	2.89797e-09
aggregated_scATAC_peak_71501	chr7	67142361	67143255	upstream	37292	1	ENSMUSG00000109273	Gm45101	processed_pseudogene	3.36298e-06
aggregated_scATAC_peak_71595	chr7	68717071	68717578	downstream	9143	1	ENSMUSG00000108876	Gm44692	lincRNA	7.72431e-07
aggregated_scATAC_peak_71771	chr7	74393702	74394039	PeakInsideFeature	1172	0	ENSMUSG00000085161	Gm7580	antisense_RNA	2.99744e-06
aggregated_scATAC_peak_71792	chr7	75296628	75297047	upstream	11858	1	ENSMUSG00000097247	1500012K07Rik	processed_transcript	4.9797e-05
aggregated_scATAC_peak_71820	chr7	75786796	75787368	downstream	3050	0	ENSMUSG00000097116	Gm26729	processed_pseudogene	3.74656e-05
aggregated_scATAC_peak_71839	chr7	76401967	76402547	NA	NA	0,1	NA	NA	NA	1.51998e-06
aggregated_scATAC_peak_72080	chr7	81249857	81250388	upstream	27248	1	ENSMUSG00000083774	Gm7180	processed_pseudogene	9.42864e-08
aggregated_scATAC_peak_72149	chr7	82769639	82769840	upstream	14096	1	ENSMUSG00000086690	4933406J10Rik	antisense_RNA	1.04976e-06
aggregated_scATAC_peak_72265	chr7	89554082	89554411	PeakInsideFeature	1880	0	ENSMUSG00000108875	Gm45064	lincRNA	3.66963e-05
aggregated_scATAC_peak_72365	chr7	96331178	96331494	downstream	10628	1	ENSMUSG00000085751	Gm15412	antisense_RNA	2.49066e-05
aggregated_scATAC_peak_72535	chr7	98913004	98913401	downstream	8934	1	ENSMUSG00000109130	Gm45187	antisense_RNA	4.80262e-07
aggregated_scATAC_peak_72541	chr7	98957065	98957488	downstream	21382	1	ENSMUSG00000089501	Gm23479	snoRNA	7.36461e-07
aggregated_scATAC_peak_72560	chr7	99167886	99168506	PeakInsideFeature	14523	1	ENSMUSG00000030747	Dgat2	protein_coding	9.99914e-10
aggregated_scATAC_peak_72562	chr7	99199997	99200788	upstream	1974	0	ENSMUSG00000109052	Gm45012	antisense_RNA	5.72562e-07
aggregated_scATAC_peak_72656	chr7	100322054	100322419	downstream	36716	1	ENSMUSG00000051048	P4ha3	protein_coding	3.63885e-06
aggregated_scATAC_peak_72662	chr7	100401685	100402405	downstream	20451	1	ENSMUSG00000109046	Gm44571	processed_pseudogene	1.83495e-06
aggregated_scATAC_peak_72724	chr7	101085015	101085692	upstream	7509	1	ENSMUSG00000030691	Fchsd2	protein_coding	1.24641e-05
aggregated_scATAC_peak_72774	chr7	101870566	101871184	overlapStart	87	0	ENSMUSG00000001827	Folr1	protein_coding	9.58315e-08
aggregated_scATAC_peak_72778	chr7	101921131	101921457	PeakInsideFeature	12601	1	ENSMUSG00000064307	Lrrc51	protein_coding	9.96453e-05
aggregated_scATAC_peak_72965	chr7	110087963	110088481	upstream	26897	1	ENSMUSG00000073867	AA474408	TEC	4.39175e-12
aggregated_scATAC_peak_72967	chr7	110097190	110098061	upstream	22364	1	ENSMUSG00000109904	Gm45819	TEC	9.94794e-07
aggregated_scATAC_peak_72976	chr7	110211032	110211354	upstream	10518	1	ENSMUSG00000031015	Swap70	protein_coding	8.57559e-10
aggregated_scATAC_peak_73067	chr7	112208826	112209167	upstream	16860	1	ENSMUSG00000038244	Mical2	protein_coding	6.92216e-06
aggregated_scATAC_peak_73068	chr7	112212928	112213856	upstream	12464	1	ENSMUSG00000038244	Mical2	protein_coding	9.65508e-07
aggregated_scATAC_peak_73109	chr7	112587524	112588007	downstream	30459	1	ENSMUSG00000093002	Gm24154	snoRNA	2.56283e-06
aggregated_scATAC_peak_73158	chr7	112966436	112967280	downstream	6025	1	ENSMUSG00000110109	Gm5599	processed_pseudogene	2.18278e-07
aggregated_scATAC_peak_73188	chr7	113591036	113591716	upstream	1486	0	ENSMUSG00000109968	Gm45612	processed_pseudogene	6.84989e-07
aggregated_scATAC_peak_73225	chr7	114322973	114323563	upstream	47150	1	ENSMUSG00000030751	Psma1	protein_coding	2.13282e-05
aggregated_scATAC_peak_73291	chr7	116114809	116115217	upstream	21854	1	ENSMUSG00000087621	1700003G18Rik	processed_transcript	2.64669e-07
aggregated_scATAC_peak_73316	chr7	116286789	116287423	upstream	4221	0	ENSMUSG00000108650	Gm44867	sense_intronic	4.66787e-06
aggregated_scATAC_peak_73388	chr7	118463022	118463298	upstream	14938	1	ENSMUSG00000058420	Syt17	protein_coding	2.38685e-08
aggregated_scATAC_peak_73445	chr7	119760491	119761061	overlapStart	147	0	ENSMUSG00000030935	Acsm3	protein_coding	6.91809e-05
aggregated_scATAC_peak_73537	chr7	122203756	122204286	upstream	15475	1	ENSMUSG00000030865	Chp2	protein_coding	9.82877e-08
aggregated_scATAC_peak_73588	chr7	124914977	124915457	downstream	7608	1	ENSMUSG00000108623	Gm45092	lincRNA	1.81517e-06
aggregated_scATAC_peak_73632	chr7	126158961	126159227	upstream	4939	0	ENSMUSG00000090559	Gm17137	transcribed_processed_pseudogene	2.63733e-08
aggregated_scATAC_peak_73809	chr7	128303953	128305218	upstream	6416	1	ENSMUSG00000030780	BC017158	protein_coding	3.91975e-06
aggregated_scATAC_peak_73845	chr7	128913572	128914719	NA	NA	0,1	NA	NA	NA	1.65941e-08
aggregated_scATAC_peak_73862	chr7	129680569	129681411	PeakInsideFeature	13585	1	ENSMUSG00000108481	Gm33248	sense_intronic	3.86272e-08
aggregated_scATAC_peak_73875	chr7	129937637	129937974	upstream	24359	1	ENSMUSG00000108504	Gm4265	lincRNA	5.13747e-07
aggregated_scATAC_peak_73876	chr7	129938185	129938516	upstream	23815	1	ENSMUSG00000108504	Gm4265	lincRNA	4.67462e-09
aggregated_scATAC_peak_73897	chr7	130134561	130135458	NA	NA	0,1	NA	NA	NA	7.46864e-07
aggregated_scATAC_peak_73924	chr7	130335450	130336369	downstream	18452	1	ENSMUSG00000082988	Gm5903	processed_pseudogene	4.93054e-11
aggregated_scATAC_peak_73980	chr7	131303488	131303737	downstream	18680	1	ENSMUSG00000040205	Cuzd1	protein_coding	1.9047e-06
aggregated_scATAC_peak_74015	chr7	132015874	132016214	upstream	42597	1	ENSMUSG00000084630	n-R5s159	rRNA	4.5877e-06
aggregated_scATAC_peak_74024	chr7	132220154	132220770	NA	NA	0,1	NA	NA	NA	4.84896e-06
aggregated_scATAC_peak_74102	chr7	133389952	133390163	NA	NA	0,1	NA	NA	NA	2.28683e-06
aggregated_scATAC_peak_74105	chr7	133481433	133481872	NA	NA	0,1	NA	NA	NA	1.45211e-07
aggregated_scATAC_peak_74112	chr7	133604881	133605358	upstream	373	0	ENSMUSG00000110026	Gm35625	lincRNA	3.75489e-05
aggregated_scATAC_peak_74204	chr7	135746927	135747414	PeakInsideFeature	4494	1	ENSMUSG00000109831	Gm36431	lincRNA	7.8945e-06
aggregated_scATAC_peak_74311	chr7	138803290	138803836	upstream	17182	1	ENSMUSG00000110241	Gm45506	processed_pseudogene	8.38856e-05
aggregated_scATAC_peak_74489	chr7	141340424	141340880	PeakInsideFeature	1772	0	ENSMUSG00000025504	Eps8l2	protein_coding	3.25171e-05
aggregated_scATAC_peak_74518	chr7	141581246	141581749	PeakInsideFeature	19325	1	ENSMUSG00000002957	Ap2a2	protein_coding	3.63354e-06
aggregated_scATAC_peak_74593	chr7	142509508	142509929	upstream	2947	0	ENSMUSG00000043795	Prr33	lincRNA	3.89974e-06
aggregated_scATAC_peak_74723	chr7	143986194	143986816	upstream	15423	1	ENSMUSG00000037541	Shank2	protein_coding	5.27732e-05
aggregated_scATAC_peak_74829	chr7	145207999	145208427	overlapStart	94	0	ENSMUSG00000109305	1810010D01Rik	protein_coding	3.20436e-08
aggregated_scATAC_peak_74840	chr7	145329275	145329475	downstream	14540	1	ENSMUSG00000051207	Mrgprd	protein_coding	6.94077e-05
aggregated_scATAC_peak_75041	chr8	10866079	10867387	overlapStart	547	0	ENSMUSG00000108961	Gm32540	lincRNA	3.08601e-08
aggregated_scATAC_peak_75146	chr8	11969118	11969906	PeakInsideFeature	21173	1	ENSMUSG00000109995	B020031H02Rik	lincRNA	3.55801e-05
aggregated_scATAC_peak_75147	chr8	11977228	11977693	PeakInsideFeature	29121	1	ENSMUSG00000109995	B020031H02Rik	lincRNA	7.66672e-05
aggregated_scATAC_peak_75196	chr8	12698669	12699191	downstream	20197	1	ENSMUSG00000074469	Gm15348	lincRNA	8.56501e-06
aggregated_scATAC_peak_75270	chr8	13793201	13793997	PeakInsideFeature	7984	1	ENSMUSG00000038398	Upf3a	protein_coding	1.09265e-13
aggregated_scATAC_peak_75290	chr8	14355229	14355990	downstream	5432	1	ENSMUSG00000106670	Gm44347	miRNA	8.71617e-08
aggregated_scATAC_peak_75306	chr8	14949661	14950438	downstream	11536	1	ENSMUSG00000090024	Gm16350	antisense_RNA	2.12812e-05
aggregated_scATAC_peak_75320	chr8	15030565	15030882	upstream	2302	0	ENSMUSG00000102615	Gm37844	TEC	7.98439e-09
aggregated_scATAC_peak_75363	chr8	18770528	18771156	upstream	29280	1	ENSMUSG00000031465	Angpt2	protein_coding	8.60379e-07
aggregated_scATAC_peak_75404	chr8	21756520	21757278	downstream	7724	1	ENSMUSG00000084254	Defa-ps11	unprocessed_pseudogene	7.16133e-08
aggregated_scATAC_peak_75441	chr8	22713799	22714093	upstream	7357	1	ENSMUSG00000031537	Ikbkb	protein_coding	4.01062e-05
aggregated_scATAC_peak_75493	chr8	23563747	23564066	NA	NA	0,1	NA	NA	NA	2.78949e-05
aggregated_scATAC_peak_75501	chr8	23930324	23930713	NA	NA	0,1	NA	NA	NA	6.73694e-06
aggregated_scATAC_peak_75563	chr8	25228186	25228888	PeakInsideFeature	28051	1	ENSMUSG00000065954	Tacc1	protein_coding	9.30415e-06
aggregated_scATAC_peak_75566	chr8	25252753	25252987	PeakInsideFeature	3718	0	ENSMUSG00000065954	Tacc1	protein_coding	2.6323e-06
aggregated_scATAC_peak_75635	chr8	26384233	26385258	NA	NA	0,1	NA	NA	NA	1.37354e-06
aggregated_scATAC_peak_75644	chr8	26593907	26594676	upstream	14490	1	ENSMUSG00000110222	Gm39149	lincRNA	5.1111e-05
aggregated_scATAC_peak_75645	chr8	26600138	26600485	upstream	20510	1	ENSMUSG00000110222	Gm39149	lincRNA	1.75352e-07
aggregated_scATAC_peak_75650	chr8	26655761	26656713	downstream	12069	1	ENSMUSG00000109680	Gm32098	lincRNA	1.55795e-10
aggregated_scATAC_peak_75669	chr8	26881299	26881590	PeakInsideFeature	2936	0	ENSMUSG00000100335	2310008N11Rik	lincRNA	2.41108e-08
aggregated_scATAC_peak_75674	chr8	26961089	26962108	upstream	4836	0	ENSMUSG00000110345	Gm45572	lincRNA	2.05543e-06
aggregated_scATAC_peak_75734	chr8	30566008	30566208	upstream	2285	0	ENSMUSG00000097044	4933433F19Rik	lincRNA	7.49738e-05
aggregated_scATAC_peak_75735	chr8	30587379	30587879	downstream	19236	1	ENSMUSG00000097044	4933433F19Rik	lincRNA	9.67897e-07
aggregated_scATAC_peak_75785	chr8	32174478	32174758	upstream	11511	1	ENSMUSG00000089370	Gm22140	snRNA	1.61414e-07
aggregated_scATAC_peak_75812	chr8	33799611	33799854	upstream	13471	1	ENSMUSG00000097442	Gm26632	antisense_RNA	2.33672e-06
aggregated_scATAC_peak_75833	chr8	33963612	33964432	upstream	21892	1	ENSMUSG00000110663	Gm39157	lincRNA	1.19494e-08
aggregated_scATAC_peak_75836	chr8	33992067	33993468	upstream	5568	1	ENSMUSG00000110614	Gm45817	TEC	4.83583e-06
aggregated_scATAC_peak_75895	chr8	34970683	34971159	upstream	5231	1	ENSMUSG00000031529	Tnks	protein_coding	1.13426e-07
aggregated_scATAC_peak_75907	chr8	35223980	35225169	PeakInsideFeature	1616	0	ENSMUSG00000109607	Gm34533	lincRNA	3.13903e-13
aggregated_scATAC_peak_75959	chr8	36073209	36073689	upstream	21379	1	ENSMUSG00000050271	Prag1	protein_coding	3.9891e-06
aggregated_scATAC_peak_75967	chr8	36151845	36152210	upstream	3982	0	ENSMUSG00000109704	Gm38414	lincRNA	8.32129e-05
aggregated_scATAC_peak_76003	chr8	36675501	36675786	NA	NA	0,1	NA	NA	NA	3.58762e-05
aggregated_scATAC_peak_76024	chr8	37995239	37995642	NA	NA	0,1	NA	NA	NA	2.26237e-06
aggregated_scATAC_peak_76078	chr8	43214351	43214938	downstream	14676	1	ENSMUSG00000109974	Gm2221	processed_pseudogene	1.58169e-06
aggregated_scATAC_peak_76083	chr8	44800847	44801301	NA	NA	0,1	NA	NA	NA	6.55329e-06
aggregated_scATAC_peak_76117	chr8	45610783	45611231	upstream	5867	1	ENSMUSG00000084954	Gm16351	antisense_RNA	4.79844e-05
aggregated_scATAC_peak_76157	chr8	46720703	46720978	PeakInsideFeature	18675	1	ENSMUSG00000097534	Gm16675	bidirectional_promoter_lncRNA	1.91733e-11
aggregated_scATAC_peak_76187	chr8	47338747	47339395	NA	NA	0,1	NA	NA	NA	9.22982e-06
aggregated_scATAC_peak_76195	chr8	47494722	47495057	PeakInsideFeature	38580	1	ENSMUSG00000038102	Trappc11	protein_coding	1.98597e-05
aggregated_scATAC_peak_76202	chr8	47652261	47652913	upstream	19823	1	ENSMUSG00000062458	Gm8623	processed_pseudogene	1.42393e-05
aggregated_scATAC_peak_76217	chr8	47874822	47875399	upstream	24072	1	ENSMUSG00000064519	n-R5s97	rRNA	3.18582e-05
aggregated_scATAC_peak_76242	chr8	48468185	48468394	NA	NA	0,1	NA	NA	NA	9.7154e-05
aggregated_scATAC_peak_76270	chr8	53614064	53614264	PeakInsideFeature	24901	1	ENSMUSG00000039396	Neil3	protein_coding	5.20979e-08
aggregated_scATAC_peak_76364	chr8	61142058	61142704	upstream	29879	1	ENSMUSG00000080956	Gm16179	processed_pseudogene	2.53012e-06
aggregated_scATAC_peak_76369	chr8	61273237	61273581	downstream	15463	1	ENSMUSG00000099419	1700001D01Rik	antisense_RNA	1.41092e-06
aggregated_scATAC_peak_76394	chr8	61682942	61683262	NA	NA	0,1	NA	NA	NA	6.8259e-07
aggregated_scATAC_peak_76396	chr8	61686946	61687581	NA	NA	0,1	NA	NA	NA	5.08804e-09
aggregated_scATAC_peak_76418	chr8	63921227	63921869	upstream	11616	1	ENSMUSG00000109818	Gm35713	processed_pseudogene	1.18814e-07
aggregated_scATAC_peak_76441	chr8	65071079	65071290	upstream	3849	0	ENSMUSG00000074302	Gm10663	protein_coding	6.58982e-05
aggregated_scATAC_peak_76447	chr8	65129527	65129727	overlapStart	64	0	ENSMUSG00000074300	BC030870	protein_coding	2.31953e-06
aggregated_scATAC_peak_76450	chr8	65356018	65356326	upstream	11129	1	ENSMUSG00000064905	Gm25403	misc_RNA	2.97957e-05
aggregated_scATAC_peak_76484	chr8	68016101	68016516	downstream	5968	1	ENSMUSG00000077545	Gm22018	snoRNA	9.32996e-05
aggregated_scATAC_peak_76651	chr8	70723312	70724093	overlapStart	18	0	ENSMUSG00000031842	Pde4c	protein_coding	1.00791e-05
aggregated_scATAC_peak_76831	chr8	74830100	74830520	PeakInsideFeature	3637	0	ENSMUSG00000079011	Gm11033	lincRNA	3.7114e-11
aggregated_scATAC_peak_76854	chr8	75127476	75127740	PeakInsideFeature	18039	1	ENSMUSG00000005410	Mcm5	protein_coding	2.4615e-08
aggregated_scATAC_peak_76863	chr8	76243695	76244390	downstream	30408	1	ENSMUSG00000064709	Gm22509	snRNA	1.98789e-05
aggregated_scATAC_peak_76882	chr8	77523400	77523641	upstream	5567	1	ENSMUSG00000037148	Arhgap10	protein_coding	2.66669e-05
aggregated_scATAC_peak_76900	chr8	77831492	77831747	downstream	24085	1	ENSMUSG00000087761	Gm23981	snRNA	1.167e-05
aggregated_scATAC_peak_76961	chr8	79615826	79616447	upstream	23482	1	ENSMUSG00000036990	Otud4	protein_coding	9.57865e-08
aggregated_scATAC_peak_77022	chr8	82349162	82349586	NA	NA	0,1	NA	NA	NA	1.88621e-06
aggregated_scATAC_peak_77075	chr8	83779389	83780178	downstream	26866	1	ENSMUSG00000084682	Gm22024	misc_RNA	9.04673e-05
aggregated_scATAC_peak_77130	chr8	84321910	84322447	upstream	18445	1	ENSMUSG00000109653	Gm45608	processed_pseudogene	4.7925e-08
aggregated_scATAC_peak_77305	chr8	87146706	87146954	PeakInsideFeature	32185	1	ENSMUSG00000098684	Gm27246	lincRNA	1.45335e-07
aggregated_scATAC_peak_77403	chr8	88528483	88528740	PeakInsideFeature	7258	1	ENSMUSG00000031661	Nkd1	protein_coding	4.6957e-05
aggregated_scATAC_peak_77453	chr8	89318015	89318323	NA	NA	0,1	NA	NA	NA	9.92436e-05
aggregated_scATAC_peak_77457	chr8	89387374	89387867	NA	NA	0,1	NA	NA	NA	8.49789e-05
aggregated_scATAC_peak_77483	chr8	90288405	90288608	NA	NA	0,1	NA	NA	NA	9.03932e-06
aggregated_scATAC_peak_77586	chr8	91884421	91885076	downstream	18877	1	ENSMUSG00000099664	Gm28511	lincRNA	6.04524e-06
aggregated_scATAC_peak_77664	chr8	93337096	93337604	overlapStart	42	0	ENSMUSG00000057074	Ces1g	protein_coding	1.40236e-06
aggregated_scATAC_peak_77692	chr8	93989849	93990053	PeakInsideFeature	22891	1	ENSMUSG00000031751	Amfr	protein_coding	4.36299e-09
aggregated_scATAC_peak_77778	chr8	94974328	94974980	overlapStart	97	0	ENSMUSG00000031785	Adgrg1	protein_coding	5.90429e-05
aggregated_scATAC_peak_77789	chr8	95042137	95042926	upstream	3449	0	ENSMUSG00000110426	Gm45757	TEC	2.24389e-05
aggregated_scATAC_peak_77798	chr8	95137249	95138352	overlapStart	510	0	ENSMUSG00000110475	Gm31036	antisense_RNA	4.58266e-06
aggregated_scATAC_peak_77801	chr8	95146079	95146562	PeakInsideFeature	8010	1	ENSMUSG00000110475	Gm31036	antisense_RNA	3.84109e-07
aggregated_scATAC_peak_78023	chr8	105754786	105755009	PeakInsideFeature	3766	0	ENSMUSG00000013150	Gfod2	protein_coding	7.3258e-06
aggregated_scATAC_peak_78050	chr8	106134905	106135506	overlapStart	194	0	ENSMUSG00000086390	1810019D21Rik	processed_transcript	3.43988e-11
aggregated_scATAC_peak_78057	chr8	106177451	106178107	PeakInsideFeature	8922	1	ENSMUSG00000031904	Slc7a6	protein_coding	1.36916e-06
aggregated_scATAC_peak_78090	chr8	106572996	106573478	overlapStart	224	0	ENSMUSG00000060019	Gm10073	protein_coding	3.26967e-06
aggregated_scATAC_peak_78143	chr8	107197984	107198561	downstream	47632	1	ENSMUSG00000031924	Cyb5b	protein_coding	7.64786e-05
aggregated_scATAC_peak_78163	chr8	107503247	107503844	upstream	47698	1	ENSMUSG00000065439	Mir140	miRNA	8.08872e-05
aggregated_scATAC_peak_78222	chr8	108767916	108768461	downstream	30595	1	ENSMUSG00000104292	Gm38042	TEC	9.70012e-05
aggregated_scATAC_peak_78325	chr8	110961770	110962048	upstream	21595	1	ENSMUSG00000097380	Gm26816	lincRNA	8.18569e-07
aggregated_scATAC_peak_78347	chr8	111384731	111384953	PeakInsideFeature	8982	1	ENSMUSG00000033579	Fa2h	protein_coding	5.77887e-05
aggregated_scATAC_peak_78430	chr8	113820861	113821680	PeakInsideFeature	27468	1	ENSMUSG00000053399	Adamts18	protein_coding	1.511e-06
aggregated_scATAC_peak_78446	chr8	114479806	114480142	PeakInsideFeature	40319	1	ENSMUSG00000004637	Wwox	protein_coding	2.44064e-06
aggregated_scATAC_peak_78489	chr8	115626137	115626405	upstream	34998	1	ENSMUSG00000065090	Gm23677	snRNA	1.03608e-08
aggregated_scATAC_peak_78497	chr8	115861409	115861713	NA	NA	0,1	NA	NA	NA	1.60777e-05
aggregated_scATAC_peak_78498	chr8	115885182	115885678	NA	NA	0,1	NA	NA	NA	7.88973e-05
aggregated_scATAC_peak_78551	chr8	117314330	117315261	NA	NA	0,1	NA	NA	NA	3.33245e-05
aggregated_scATAC_peak_78558	chr8	117347626	117347843	NA	NA	0,1	NA	NA	NA	4.28898e-07
aggregated_scATAC_peak_78660	chr8	119740707	119741135	downstream	26467	1	ENSMUSG00000110445	Gm45747	TEC	9.88327e-06
aggregated_scATAC_peak_78700	chr8	120138783	120139303	PeakInsideFeature	24891	1	ENSMUSG00000031824	6430548M08Rik	protein_coding	1.44542e-07
aggregated_scATAC_peak_78844	chr8	120959350	120960169	upstream	43167	1	ENSMUSG00000101886	Gm28324	lincRNA	2.03403e-05
aggregated_scATAC_peak_79107	chr8	122986453	122986776	upstream	3671	0	ENSMUSG00000065915	Gm24445	snRNA	5.75094e-06
aggregated_scATAC_peak_79185	chr8	123760617	123760864	upstream	6014	1	ENSMUSG00000097203	4732419C18Rik	lincRNA	1.70645e-05
aggregated_scATAC_peak_79369	chr8	125918801	125919065	PeakInsideFeature	8483	1	ENSMUSG00000031853	Map3k21	protein_coding	1.65925e-05
aggregated_scATAC_peak_79370	chr8	125919603	125919903	PeakInsideFeature	9303	1	ENSMUSG00000031853	Map3k21	protein_coding	2.55132e-05
aggregated_scATAC_peak_79372	chr8	125930387	125930623	PeakInsideFeature	20055	1	ENSMUSG00000031853	Map3k21	protein_coding	7.32587e-05
aggregated_scATAC_peak_79443	chr8	126901620	126902013	PeakInsideFeature	6399	1	ENSMUSG00000110697	Gm31718	lincRNA	4.37239e-05
aggregated_scATAC_peak_79462	chr8	127134422	127134680	NA	NA	0,1	NA	NA	NA	2.4587e-09
aggregated_scATAC_peak_79468	chr8	127175403	127175686	NA	NA	0,1	NA	NA	NA	7.96449e-08
aggregated_scATAC_peak_79477	chr8	127441047	127441496	NA	NA	0,1	NA	NA	NA	9.94303e-07
aggregated_scATAC_peak_79506	chr8	128263324	128263524	downstream	14801	1	ENSMUSG00000099326	Mir21c	miRNA	4.36643e-06
aggregated_scATAC_peak_79509	chr8	128327336	128327728	upstream	31072	1	ENSMUSG00000025810	Nrp1	protein_coding	6.16206e-05
aggregated_scATAC_peak_79516	chr8	128424937	128425245	NA	NA	0,1	NA	NA	NA	3.0588e-07
aggregated_scATAC_peak_79567	chr9	7304073	7304390	downstream	31718	1	ENSMUSG00000050578	Mmp13	protein_coding	4.6957e-05
aggregated_scATAC_peak_79666	chr9	14134835	14135409	upstream	26999	1	ENSMUSG00000111479	AC154826.1	lincRNA	1.16087e-12
aggregated_scATAC_peak_79889	chr9	21835236	21835650	overlapStart	67	0	ENSMUSG00000047822	Angptl8	protein_coding	1.78418e-07
aggregated_scATAC_peak_79946	chr9	22544820	22545144	NA	NA	0,1	NA	NA	NA	1.09834e-05
aggregated_scATAC_peak_79950	chr9	22698730	22698981	upstream	20538	1	ENSMUSG00000089909	Gm16164	processed_pseudogene	1.26714e-05
aggregated_scATAC_peak_79977	chr9	23453218	23453703	NA	NA	0,1	NA	NA	NA	1.05601e-06
aggregated_scATAC_peak_80046	chr9	27131897	27132314	PeakInsideFeature	23315	1	ENSMUSG00000031990	Jam3	protein_coding	4.50991e-05
aggregated_scATAC_peak_80057	chr9	27312065	27312408	PeakInsideFeature	13032	1	ENSMUSG00000034275	Igsf9b	protein_coding	4.04152e-08
aggregated_scATAC_peak_80078	chr9	28563137	28563582	NA	NA	0,1	NA	NA	NA	8.36685e-06
aggregated_scATAC_peak_80090	chr9	29318372	29319483	NA	NA	0,1	NA	NA	NA	1.1725e-08
aggregated_scATAC_peak_80119	chr9	30467564	30467848	upstream	22253	1	ENSMUSG00000111260	CU024910.1	processed_pseudogene	9.09926e-05
aggregated_scATAC_peak_80156	chr9	31148120	31148408	upstream	16411	1	ENSMUSG00000031995	St14	protein_coding	7.62145e-05
aggregated_scATAC_peak_80172	chr9	31345487	31345814	upstream	40542	1	ENSMUSG00000042185	Nfrkb	protein_coding	9.60294e-07
aggregated_scATAC_peak_80175	chr9	31354125	31354383	upstream	31938	1	ENSMUSG00000042185	Nfrkb	protein_coding	2.25589e-05
aggregated_scATAC_peak_80188	chr9	31650662	31650986	downstream	7054	1	ENSMUSG00000111153	Gm18820	processed_pseudogene	6.38356e-13
aggregated_scATAC_peak_80207	chr9	31996486	31996822	PeakInsideFeature	8806	1	ENSMUSG00000111771	AC160635.2	lincRNA	4.78833e-05
aggregated_scATAC_peak_80219	chr9	32243007	32243270	NA	NA	0,1	NA	NA	NA	1.02006e-05
aggregated_scATAC_peak_80305	chr9	34721591	34722428	NA	NA	0,1	NA	NA	NA	7.25543e-08
aggregated_scATAC_peak_80458	chr9	40323142	40323565	overlapStart	72	0	ENSMUSG00000087047	1700110K17Rik	antisense_RNA	7.80653e-08
aggregated_scATAC_peak_80459	chr9	40323643	40323848	PeakInsideFeature	320	0	ENSMUSG00000087047	1700110K17Rik	antisense_RNA	5.73377e-05
aggregated_scATAC_peak_80533	chr9	41185360	41185764	upstream	6884	1	ENSMUSG00000100837	1700063D05Rik	lincRNA	4.39993e-05
aggregated_scATAC_peak_80604	chr9	42673332	42674107	NA	NA	0,1	NA	NA	NA	9.71435e-05
aggregated_scATAC_peak_80654	chr9	43231852	43232732	PeakInsideFeature	7619	1	ENSMUSG00000032014	Oaf	protein_coding	8.45962e-05
aggregated_scATAC_peak_80666	chr9	43310237	43310870	overlapStart	294	0	ENSMUSG00000032013	Trim29	protein_coding	3.92574e-08
aggregated_scATAC_peak_80725	chr9	43934461	43935076	upstream	28766	1	ENSMUSG00000088044	Gm23326	snRNA	4.83007e-05
aggregated_scATAC_peak_80790	chr9	44581255	44581903	PeakInsideFeature	1971	0	ENSMUSG00000111378	AC151971.5	lincRNA	2.75573e-06
aggregated_scATAC_peak_80810	chr9	44792475	44792923	upstream	6559	1	ENSMUSG00000110750	AC142113.1	antisense_RNA	1.36229e-05
aggregated_scATAC_peak_80815	chr9	44874336	44874577	upstream	3435	0	ENSMUSG00000110773	AC061963.1	antisense_RNA	3.4875e-07
aggregated_scATAC_peak_80831	chr9	45136708	45137140	upstream	1318	0	ENSMUSG00000074385	Gm10684	lincRNA	2.25247e-05
aggregated_scATAC_peak_80847	chr9	45398225	45398708	upstream	1203	0	ENSMUSG00000059412	Fxyd2	protein_coding	3.64195e-09
aggregated_scATAC_peak_80867	chr9	45688979	45689416	NA	NA	0,1	NA	NA	NA	6.54462e-08
aggregated_scATAC_peak_80928	chr9	46447075	46447316	downstream	49834	1	ENSMUSG00000110802	AC164105.1	lincRNA	1.11658e-05
aggregated_scATAC_peak_80937	chr9	46779984	46780251	NA	NA	0,1	NA	NA	NA	1.0523e-05
aggregated_scATAC_peak_80949	chr9	47320980	47321257	PeakInsideFeature	47531	1	ENSMUSG00000109844	Gm31816	lincRNA	2.18213e-08
aggregated_scATAC_peak_80954	chr9	47367968	47368899	overlapStart	215	0	ENSMUSG00000109844	Gm31816	lincRNA	2.31538e-05
aggregated_scATAC_peak_81002	chr9	47946522	47947372	downstream	1214	0	ENSMUSG00000111668	AC183268.3	processed_pseudogene	5.16943e-06
aggregated_scATAC_peak_81023	chr9	48587943	48588319	downstream	17022	1	ENSMUSG00000032271	Nnmt	protein_coding	5.59984e-12
aggregated_scATAC_peak_81025	chr9	48596973	48597387	PeakInsideFeature	7973	1	ENSMUSG00000032271	Nnmt	protein_coding	2.73642e-05
aggregated_scATAC_peak_81047	chr9	48794951	48796066	PeakInsideFeature	40714	1	ENSMUSG00000066687	Zbtb16	protein_coding	4.22167e-08
aggregated_scATAC_peak_81055	chr9	48860030	48860854	upstream	24220	1	ENSMUSG00000066687	Zbtb16	protein_coding	4.07061e-05
aggregated_scATAC_peak_81127	chr9	50594636	50595539	downstream	8724	1	ENSMUSG00000000171	Sdhd	protein_coding	5.91075e-08
aggregated_scATAC_peak_81174	chr9	51735216	51735757	upstream	29851	1	ENSMUSG00000053199	Arhgap20	protein_coding	3.30636e-05
aggregated_scATAC_peak_81199	chr9	52186511	52186842	upstream	18104	1	ENSMUSG00000035164	Zc3h12c	protein_coding	7.81386e-06
aggregated_scATAC_peak_81221	chr9	53356258	53357131	upstream	27331	1	ENSMUSG00000034487	Kdelc2	protein_coding	5.53595e-06
aggregated_scATAC_peak_81264	chr9	54569362	54569923	upstream	9424	1	ENSMUSG00000037493	Cib2	protein_coding	7.15313e-08
aggregated_scATAC_peak_81311	chr9	55273260	55273460	upstream	31928	1	ENSMUSG00000082744	Gm15625	processed_pseudogene	1.63337e-05
aggregated_scATAC_peak_81433	chr9	57283605	57283882	upstream	21132	1	ENSMUSG00000032300	1700017B05Rik	protein_coding	9.18176e-06
aggregated_scATAC_peak_81563	chr9	58832892	58833520	PeakInsideFeature	9794	1	ENSMUSG00000032338	Hcn4	protein_coding	1.42099e-07
aggregated_scATAC_peak_81619	chr9	60015634	60016324	downstream	26200	1	ENSMUSG00000088090	Gm23668	rRNA	4.68734e-08
aggregated_scATAC_peak_81655	chr9	60610253	60610554	NA	NA	0,1	NA	NA	NA	1.11017e-06
aggregated_scATAC_peak_81656	chr9	60625857	60626267	NA	NA	0,1	NA	NA	NA	7.69205e-06
aggregated_scATAC_peak_81664	chr9	60752045	60752412	PeakInsideFeature	9108	1	ENSMUSG00000095956	1700036A12Rik	lincRNA	8.07892e-07
aggregated_scATAC_peak_81712	chr9	61306410	61306665	upstream	12729	1	ENSMUSG00000111658	B930092H01Rik	lincRNA	6.6771e-09
aggregated_scATAC_peak_81724	chr9	61367850	61368276	upstream	4303	0	ENSMUSG00000032280	Tle3	protein_coding	1.56257e-08
aggregated_scATAC_peak_81730	chr9	61377647	61378103	PeakInsideFeature	5509	1	ENSMUSG00000032280	Tle3	protein_coding	2.81021e-06
aggregated_scATAC_peak_81744	chr9	61491640	61491920	upstream	17943	1	ENSMUSG00000111381	Gm34424	transcribed_processed_pseudogene	2.68447e-05
aggregated_scATAC_peak_81765	chr9	61795680	61796570	downstream	33041	1	ENSMUSG00000111739	AC153363.1	processed_pseudogene	3.04851e-09
aggregated_scATAC_peak_81770	chr9	61841199	61841823	upstream	10193	1	ENSMUSG00000110968	Gm19208	processed_pseudogene	2.67187e-05
aggregated_scATAC_peak_81785	chr9	61958887	61959124	upstream	12232	1	ENSMUSG00000032254	Kif23	protein_coding	1.01754e-06
aggregated_scATAC_peak_81795	chr9	62008368	62008920	upstream	11950	1	ENSMUSG00000088743	Gm23221	misc_RNA	1.07108e-07
aggregated_scATAC_peak_81796	chr9	62021505	62021848	downstream	1082	0	ENSMUSG00000088743	Gm23221	misc_RNA	1.94331e-08
aggregated_scATAC_peak_81802	chr9	62129273	62129637	upstream	6800	1	ENSMUSG00000032252	Glce	protein_coding	5.12858e-06
aggregated_scATAC_peak_81878	chr9	62994966	62995679	upstream	7398	1	ENSMUSG00000032405	Pias1	protein_coding	3.52059e-08
aggregated_scATAC_peak_82018	chr9	64519964	64520766	NA	NA	0,1	NA	NA	NA	5.17143e-12
aggregated_scATAC_peak_82021	chr9	64568566	64568937	NA	NA	0,1	NA	NA	NA	1.32597e-07
aggregated_scATAC_peak_82028	chr9	64644129	64644771	NA	NA	0,1	NA	NA	NA	2.34044e-07
aggregated_scATAC_peak_82034	chr9	64700650	64700922	downstream	25944	1	ENSMUSG00000104953	AC147560.1	miRNA	2.77864e-07
aggregated_scATAC_peak_82048	chr9	64944096	64944591	PeakInsideFeature	7263	1	ENSMUSG00000034452	Slc24a1	protein_coding	4.52688e-05
aggregated_scATAC_peak_82181	chr9	66769219	66769720	downstream	26020	1	ENSMUSG00000032375	Aph1b	protein_coding	1.72434e-10
aggregated_scATAC_peak_82189	chr9	66855834	66856215	upstream	21298	1	ENSMUSG00000053040	Aph1c	protein_coding	6.40951e-06
aggregated_scATAC_peak_82211	chr9	67071116	67071917	upstream	22110	1	ENSMUSG00000032366	Tpm1	protein_coding	1.23558e-05
aggregated_scATAC_peak_82212	chr9	67072159	67072491	upstream	22919	1	ENSMUSG00000032366	Tpm1	protein_coding	3.797e-06
aggregated_scATAC_peak_82253	chr9	67544867	67545701	PeakInsideFeature	14419	1	ENSMUSG00000052698	Tln2	protein_coding	6.62369e-11
aggregated_scATAC_peak_82255	chr9	67605849	67606290	upstream	46367	1	ENSMUSG00000052698	Tln2	protein_coding	7.4243e-06
aggregated_scATAC_peak_82351	chr9	69713201	69713511	upstream	45384	1	ENSMUSG00000097623	B230323A14Rik	antisense_RNA	5.53063e-05
aggregated_scATAC_peak_82352	chr9	69715355	69715807	upstream	43159	1	ENSMUSG00000097623	B230323A14Rik	antisense_RNA	2.47613e-05
aggregated_scATAC_peak_82353	chr9	69717885	69718136	upstream	40730	1	ENSMUSG00000097623	B230323A14Rik	antisense_RNA	2.46356e-05
aggregated_scATAC_peak_82388	chr9	70241246	70241732	PeakInsideFeature	34139	1	ENSMUSG00000032220	Myo1e	protein_coding	4.17231e-05
aggregated_scATAC_peak_82445	chr9	71527407	71527759	upstream	41648	1	ENSMUSG00000032199	Polr2m	protein_coding	1.17563e-05
aggregated_scATAC_peak_82460	chr9	71636458	71637280	upstream	36729	1	ENSMUSG00000111815	Gm6018	processed_pseudogene	4.46606e-10
aggregated_scATAC_peak_82497	chr9	72047740	72048538	upstream	4904	0	ENSMUSG00000102874	Gm37137	TEC	6.76613e-06
aggregated_scATAC_peak_82579	chr9	74109940	74110728	overlapStart	22	0	ENSMUSG00000044976	Wdr72	protein_coding	7.29707e-05
aggregated_scATAC_peak_82595	chr9	74866575	74867254	PeakInsideFeature	4993	1	ENSMUSG00000043013	Onecut1	protein_coding	7.45032e-07
aggregated_scATAC_peak_82705	chr9	77897678	77898099	upstream	3641	0	ENSMUSG00000110724	AC159886.1	TEC	2.04385e-05
aggregated_scATAC_peak_82777	chr9	79869259	79869908	upstream	31197	1	ENSMUSG00000092565	Gm20477	processed_pseudogene	4.21408e-08
aggregated_scATAC_peak_82812	chr9	83320855	83321481	upstream	24991	1	ENSMUSG00000111443	Gm46123	lincRNA	2.39372e-09
aggregated_scATAC_peak_83003	chr9	94408620	94409024	upstream	696	0	ENSMUSG00000101949	Gm5370	processed_pseudogene	2.13064e-05
aggregated_scATAC_peak_83006	chr9	94473973	94474232	NA	NA	0,1	NA	NA	NA	9.2571e-05
aggregated_scATAC_peak_83030	chr9	95552397	95552704	upstream	1947	0	ENSMUSG00000110827	Gm32281	lincRNA	3.94382e-05
aggregated_scATAC_peak_83091	chr9	96958071	96958643	NA	NA	0,1	NA	NA	NA	3.93803e-05
aggregated_scATAC_peak_83122	chr9	98218912	98219121	upstream	31863	1	ENSMUSG00000046995	2610303G11Rik	lincRNA	1.33749e-07
aggregated_scATAC_peak_83124	chr9	98280135	98280713	upstream	7011	1	ENSMUSG00000032456	Nmnat3	protein_coding	7.86492e-06
aggregated_scATAC_peak_83185	chr9	99451179	99451771	overlapStart	0	0	ENSMUSG00000046242	Nme9	protein_coding	2.15892e-06
aggregated_scATAC_peak_83194	chr9	99608742	99609683	upstream	3290	0	ENSMUSG00000037953	A4gnt	protein_coding	3.99677e-05
aggregated_scATAC_peak_83211	chr9	99993937	99994745	upstream	27959	1	ENSMUSG00000101584	4930519F24Rik	lincRNA	2.64051e-05
aggregated_scATAC_peak_83216	chr9	100094821	100096024	NA	NA	0,1	NA	NA	NA	5.66212e-07
aggregated_scATAC_peak_83245	chr9	101052081	101052408	upstream	1298	0	ENSMUSG00000100563	Gm3096	processed_pseudogene	2.03808e-06
aggregated_scATAC_peak_83246	chr9	101052781	101053149	upstream	577	0	ENSMUSG00000100563	Gm3096	processed_pseudogene	1.48772e-06
aggregated_scATAC_peak_83265	chr9	101602838	101603277	NA	NA	0,1	NA	NA	NA	1.37363e-07
aggregated_scATAC_peak_83322	chr9	102734071	102735156	upstream	5034	1	ENSMUSG00000093812	Gm5627	lincRNA	3.58823e-06
aggregated_scATAC_peak_83324	chr9	102749249	102749530	PeakInsideFeature	9742	1	ENSMUSG00000093812	Gm5627	lincRNA	1.17466e-06
aggregated_scATAC_peak_83325	chr9	102756160	102756673	downstream	10093	1	ENSMUSG00000102204	Gm36958	TEC	1.16662e-06
aggregated_scATAC_peak_83327	chr9	102763243	102764033	downstream	2871	1	ENSMUSG00000102204	Gm36958	TEC	5.59251e-05
aggregated_scATAC_peak_83340	chr9	102858010	102858220	downstream	6280	1	ENSMUSG00000110877	AC164161.1	TEC	2.06789e-06
aggregated_scATAC_peak_83346	chr9	102933958	102934786	NA	NA	0,1	NA	NA	NA	4.83534e-05
aggregated_scATAC_peak_83352	chr9	102996202	102996765	downstream	4589	1	ENSMUSG00000084539	Gm25842	misc_RNA	6.36233e-07
aggregated_scATAC_peak_83353	chr9	103007689	103008954	downstream	3198	1	ENSMUSG00000065466	n-R5s89	rRNA	1.84818e-07
aggregated_scATAC_peak_83356	chr9	103049031	103049280	upstream	26690	1	ENSMUSG00000077438	Gm22595	snoRNA	2.61701e-05
aggregated_scATAC_peak_83364	chr9	103134528	103135038	downstream	14415	1	ENSMUSG00000102461	Gm37166	TEC	3.1151e-05
aggregated_scATAC_peak_83401	chr9	103550623	103551277	upstream	6140	1	ENSMUSG00000099616	4932413F04Rik	antisense_RNA	1.38315e-05
aggregated_scATAC_peak_83406	chr9	103610642	103610900	upstream	10607	1	ENSMUSG00000102441	Gm38032	TEC	2.08658e-07
aggregated_scATAC_peak_83410	chr9	103638751	103639040	upstream	38732	1	ENSMUSG00000102441	Gm38032	TEC	9.63538e-05
aggregated_scATAC_peak_83421	chr9	103780685	103781004	upstream	19007	1	ENSMUSG00000042757	Tmem108	protein_coding	4.06309e-07
aggregated_scATAC_peak_83441	chr9	104355650	104356147	upstream	5934	1	ENSMUSG00000099599	Gm28548	lincRNA	6.27846e-07
aggregated_scATAC_peak_83442	chr9	104361489	104361978	overlapStart	98	0	ENSMUSG00000099599	Gm28548	lincRNA	3.86615e-07
aggregated_scATAC_peak_83476	chr9	105675942	105676482	upstream	2661	0	ENSMUSG00000084659	Gm22720	snRNA	1.61494e-06
aggregated_scATAC_peak_83603	chr9	107575643	107575856	upstream	1177	0	ENSMUSG00000010051	Hyal1	protein_coding	9.99481e-06
aggregated_scATAC_peak_83633	chr9	107735333	107736541	upstream	25462	1	ENSMUSG00000034684	Sema3f	protein_coding	1.64281e-07
aggregated_scATAC_peak_83767	chr9	110343783	110344424	PeakInsideFeature	10816	1	ENSMUSG00000032485	Scap	protein_coding	5.04604e-06
aggregated_scATAC_peak_83785	chr9	110689276	110689765	upstream	14566	1	ENSMUSG00000104945	Gm35715	antisense_RNA	1.14382e-07
aggregated_scATAC_peak_83796	chr9	110756599	110756855	upstream	9582	1	ENSMUSG00000032492	Pth1r	protein_coding	7.34412e-06
aggregated_scATAC_peak_83798	chr9	110763436	110763705	upstream	16425	1	ENSMUSG00000032492	Pth1r	protein_coding	7.96303e-05
aggregated_scATAC_peak_83883	chr9	114042371	114042778	PeakInsideFeature	3617	0	ENSMUSG00000032507	Fbxl2	protein_coding	1.14651e-06
aggregated_scATAC_peak_83898	chr9	114445883	114446097	downstream	44885	1	ENSMUSG00000079260	Tmppe	protein_coding	1.41994e-07
aggregated_scATAC_peak_83909	chr9	114547600	114548185	PeakInsideFeature	16477	1	ENSMUSG00000079259	Trim71	protein_coding	1.53807e-09
aggregated_scATAC_peak_83939	chr9	114831685	114831983	upstream	6339	1	ENSMUSG00000084638	Gm23889	snRNA	8.71873e-05
aggregated_scATAC_peak_83976	chr9	115356702	115357473	upstream	24731	1	ENSMUSG00000080409	Mir467h	miRNA	1.95461e-08
aggregated_scATAC_peak_83990	chr9	115772794	115773038	NA	NA	0,1	NA	NA	NA	3.2637e-06
aggregated_scATAC_peak_84171	chr9	119844567	119845284	upstream	19470	1	ENSMUSG00000034115	Scn11a	protein_coding	1.17359e-07
aggregated_scATAC_peak_84202	chr9	120303375	120304802	PeakInsideFeature	2575	1	ENSMUSG00000041794	Myrip	protein_coding	2.73061e-05
aggregated_scATAC_peak_84205	chr9	120351009	120351481	upstream	33666	1	ENSMUSG00000082356	Gm15565	processed_pseudogene	4.83688e-11
aggregated_scATAC_peak_84212	chr9	120478054	120478288	upstream	14061	1	ENSMUSG00000006941	Eif1b	protein_coding	1.69688e-05
aggregated_scATAC_peak_84222	chr9	120555337	120555876	PeakInsideFeature	15788	1	ENSMUSG00000041608	Entpd3	protein_coding	6.21909e-09
aggregated_scATAC_peak_84228	chr9	120601556	120602380	downstream	18331	1	ENSMUSG00000110760	Gm39456	lincRNA	2.00928e-06
aggregated_scATAC_peak_84255	chr9	120881909	120882206	overlapStart	86	0	ENSMUSG00000111528	Gm39460	lincRNA	8.45086e-06
aggregated_scATAC_peak_84335	chr9	121869846	121870636	PeakInsideFeature	745	0	ENSMUSG00000111465	AC165080.4	lincRNA	3.79141e-09
aggregated_scATAC_peak_84403	chr9	122823700	122823925	downstream	11248	1	ENSMUSG00000088086	Gm25341	misc_RNA	1.71351e-06
aggregated_scATAC_peak_84442	chr9	123589509	123589815	downstream	42903	1	ENSMUSG00000025243	Slc6a20b	protein_coding	1.68965e-05
aggregated_scATAC_peak_84461	chr9	124410268	124410553	downstream	41193	1	ENSMUSG00000111350	CAAA01090811.1	unprocessed_pseudogene	1.83905e-05
aggregated_scATAC_peak_5563	chr10	4559164	4559525	downstream	10879	1	ENSMUSG00000112330	Gm3266	processed_pseudogene	9.22224e-05
aggregated_scATAC_peak_5564	chr10	4611338	4612059	overlapStart	105	0	ENSMUSG00000019768	Esr1	protein_coding	6.21057e-06
aggregated_scATAC_peak_5603	chr10	7140291	7140706	NA	NA	0,1	NA	NA	NA	2.57942e-07
aggregated_scATAC_peak_5624	chr10	7787302	7787681	PeakInsideFeature	5332	1	ENSMUSG00000040006	Ginm1	protein_coding	1.53267e-12
aggregated_scATAC_peak_5677	chr10	9463742	9463952	downstream	23355	1	ENSMUSG00000112307	AC112274.1	TEC	3.50231e-05
aggregated_scATAC_peak_5679	chr10	9557435	9558231	upstream	8543	1	ENSMUSG00000112700	AC155929.4	lincRNA	1.92238e-05
aggregated_scATAC_peak_5692	chr10	10301083	10301504	upstream	4365	0	ENSMUSG00000112573	AC153567.1	lincRNA	1.82119e-06
aggregated_scATAC_peak_5764	chr10	13220096	13220407	downstream	15026	1	ENSMUSG00000112042	AL713985.1	processed_pseudogene	2.32969e-05
aggregated_scATAC_peak_5789	chr10	13883401	13883735	upstream	275	0	ENSMUSG00000112102	Gm32105	lincRNA	1.31781e-05
aggregated_scATAC_peak_5821	chr10	17423916	17424250	NA	NA	0,1	NA	NA	NA	9.04722e-06
aggregated_scATAC_peak_5826	chr10	17569662	17570033	upstream	42934	1	ENSMUSG00000111927	AC100590.1	lincRNA	1.05718e-06
aggregated_scATAC_peak_5879	chr10	18604865	18605382	upstream	39169	1	ENSMUSG00000111173	AC153561.1	processed_pseudogene	4.19832e-07
aggregated_scATAC_peak_5884	chr10	18834435	18834761	upstream	2668	0	ENSMUSG00000110737	4930444F02Rik	lincRNA	6.65795e-07
aggregated_scATAC_peak_5905	chr10	19278279	19278582	upstream	12559	1	ENSMUSG00000110917	Gm33056	lincRNA	3.07299e-07
aggregated_scATAC_peak_5920	chr10	19598040	19598314	PeakInsideFeature	6228	1	ENSMUSG00000020009	Ifngr1	protein_coding	1.7896e-05
aggregated_scATAC_peak_5973	chr10	20621592	20622279	upstream	3699	0	ENSMUSG00000091730	Gm17230	processed_pseudogene	2.73407e-05
aggregated_scATAC_peak_5976	chr10	20830132	20830922	downstream	48446	1	ENSMUSG00000111177	Rps2-ps3	processed_pseudogene	7.23608e-05
aggregated_scATAC_peak_6083	chr10	22994326	22994545	upstream	37852	1	ENSMUSG00000112091	AC153553.1	processed_pseudogene	4.38517e-06
aggregated_scATAC_peak_6101	chr10	23922545	23922749	downstream	2291	1	ENSMUSG00000056379	Taar1	protein_coding	1.23031e-06
aggregated_scATAC_peak_6211	chr10	26820364	26820717	NA	NA	0,1	NA	NA	NA	2.24929e-09
aggregated_scATAC_peak_6259	chr10	29595419	29595838	downstream	18948	1	ENSMUSG00000111046	Gm46197	processed_pseudogene	6.79877e-06
aggregated_scATAC_peak_6302	chr10	31899534	31899868	downstream	31789	1	ENSMUSG00000112866	AC153967.1	TEC	3.26757e-07
aggregated_scATAC_peak_6353	chr10	37260833	37261456	downstream	2604	1	ENSMUSG00000110799	4930543K20Rik	lincRNA	7.07038e-05
aggregated_scATAC_peak_6354	chr10	37266915	37267612	upstream	3516	0	ENSMUSG00000110799	4930543K20Rik	lincRNA	8.72478e-06
aggregated_scATAC_peak_6433	chr10	40118862	40119149	downstream	9544	1	ENSMUSG00000077200	Gm25613	snoRNA	2.09919e-10
aggregated_scATAC_peak_6437	chr10	40180990	40181190	PeakInsideFeature	2602	0	ENSMUSG00000111045	AC164625.1	lincRNA	1.80812e-07
aggregated_scATAC_peak_6546	chr10	42230165	42230539	PeakInsideFeature	46403	1	ENSMUSG00000048756	Foxo3	protein_coding	1.08021e-06
aggregated_scATAC_peak_6548	chr10	42238813	42239367	PeakInsideFeature	37665	1	ENSMUSG00000048756	Foxo3	protein_coding	4.84366e-05
aggregated_scATAC_peak_6670	chr10	44074895	44075095	NA	NA	0,1	NA	NA	NA	4.842e-05
aggregated_scATAC_peak_6695	chr10	44489151	44489389	PeakInsideFeature	39231	1	ENSMUSG00000038151	Prdm1	protein_coding	1.37354e-06
aggregated_scATAC_peak_6696	chr10	44490964	44491314	PeakInsideFeature	37362	1	ENSMUSG00000038151	Prdm1	protein_coding	1.57996e-05
aggregated_scATAC_peak_6712	chr10	44864228	44864580	PeakInsideFeature	2382	0	ENSMUSG00000111868	AC156273.1	lincRNA	3.46118e-10
aggregated_scATAC_peak_6714	chr10	44913856	44914102	downstream	8198	1	ENSMUSG00000076282	Gm24271	miRNA	4.81204e-06
aggregated_scATAC_peak_6715	chr10	44968650	44968982	upstream	25522	1	ENSMUSG00000110898	Gm40638	lincRNA	9.06019e-08
aggregated_scATAC_peak_6807	chr10	52174306	52175175	upstream	14508	1	ENSMUSG00000093427	Gm18513	processed_pseudogene	6.24055e-08
aggregated_scATAC_peak_6817	chr10	52390740	52390940	PeakInsideFeature	1868	0	ENSMUSG00000038624	Nepn	protein_coding	1.86002e-06
aggregated_scATAC_peak_6818	chr10	52391240	52391868	PeakInsideFeature	2582	1	ENSMUSG00000038624	Nepn	protein_coding	7.62378e-09
aggregated_scATAC_peak_6846	chr10	53859454	53859949	NA	NA	0,1	NA	NA	NA	2.08681e-09
aggregated_scATAC_peak_6984	chr10	60042394	60043001	upstream	39563	1	ENSMUSG00000020107	Anapc16	protein_coding	1.35064e-05
aggregated_scATAC_peak_7028	chr10	60498472	60499230	NA	NA	0,1	NA	NA	NA	3.88015e-06
aggregated_scATAC_peak_7033	chr10	60592817	60593561	NA	NA	0,1	NA	NA	NA	4.22236e-10
aggregated_scATAC_peak_7034	chr10	60601845	60602573	NA	NA	0,1	NA	NA	NA	8.95724e-12
aggregated_scATAC_peak_7061	chr10	60925258	60925942	downstream	2577	1	ENSMUSG00000099279	Mir6408	miRNA	4.15449e-05
aggregated_scATAC_peak_7087	chr10	61160006	61160525	upstream	11688	1	ENSMUSG00000020096	Tbata	protein_coding	3.25655e-06
aggregated_scATAC_peak_7198	chr10	62412661	62413952	PeakInsideFeature	9185	1	ENSMUSG00000020080	Hkdc1	protein_coding	8.45765e-09
aggregated_scATAC_peak_7257	chr10	63689039	63689843	NA	NA	0,1	NA	NA	NA	6.78224e-06
aggregated_scATAC_peak_7292	chr10	67279197	67279491	PeakInsideFeature	5961	1	ENSMUSG00000075000	Nrbf2	protein_coding	1.39722e-12
aggregated_scATAC_peak_7332	chr10	68332613	68332813	upstream	11571	1	ENSMUSG00000112157	4930545H06Rik	lincRNA	5.10521e-05
aggregated_scATAC_peak_7378	chr10	69594437	69594738	upstream	28227	1	ENSMUSG00000112729	Gm46231	processed_pseudogene	6.02993e-06
aggregated_scATAC_peak_7431	chr10	70490845	70491083	downstream	10539	1	ENSMUSG00000087774	Gm22320	misc_RNA	1.33715e-08
aggregated_scATAC_peak_7446	chr10	71127969	71128296	upstream	20028	1	ENSMUSG00000112566	Gm32025	processed_pseudogene	8.59401e-06
aggregated_scATAC_peak_7594	chr10	76046797	76047910	downstream	14704	1	ENSMUSG00000049764	Zfp280b	protein_coding	4.79154e-07
aggregated_scATAC_peak_7608	chr10	76359805	76360005	upstream	14614	1	ENSMUSG00000020231	Dip2a	protein_coding	4.03444e-05
aggregated_scATAC_peak_7615	chr10	76525153	76525572	upstream	6226	1	ENSMUSG00000033105	Lss	protein_coding	8.73176e-06
aggregated_scATAC_peak_7617	chr10	76575417	76575650	overlapStart	114	0	ENSMUSG00000001155	Ftcd	protein_coding	4.95261e-06
aggregated_scATAC_peak_7697	chr10	77569514	77570465	upstream	11730	1	ENSMUSG00000009291	Pttg1ip	protein_coding	4.03697e-05
aggregated_scATAC_peak_7739	chr10	78287669	78288292	upstream	10335	1	ENSMUSG00000112442	AC160405.2	TEC	8.93259e-06
aggregated_scATAC_peak_7791	chr10	79671440	79671676	PeakInsideFeature	2189	1	ENSMUSG00000020308	Tpgs1	protein_coding	7.65505e-08
aggregated_scATAC_peak_7820	chr10	79840521	79841608	upstream	13363	1	ENSMUSG00000006498	Ptbp1	protein_coding	5.31516e-06
aggregated_scATAC_peak_8012	chr10	80975522	80975818	upstream	20960	1	ENSMUSG00000083808	Gm3828	processed_pseudogene	2.49458e-05
aggregated_scATAC_peak_8059	chr10	81284817	81285155	PeakInsideFeature	6595	1	ENSMUSG00000034917	Tjp3	protein_coding	3.34213e-05
aggregated_scATAC_peak_8173	chr10	83030061	83030838	PeakInsideFeature	1245	0	ENSMUSG00000112084	Gm10773	TEC	6.43091e-08
aggregated_scATAC_peak_8188	chr10	83140285	83141042	PeakInsideFeature	1374	0	ENSMUSG00000090200	1700025N21Rik	antisense_RNA	2.12812e-05
aggregated_scATAC_peak_8223	chr10	83914484	83915624	downstream	13202	1	ENSMUSG00000112133	AC153505.2	processed_pseudogene	1.69228e-08
aggregated_scATAC_peak_8285	chr10	84885983	84886688	upstream	31280	1	ENSMUSG00000035620	Ric8b	protein_coding	3.97375e-06
aggregated_scATAC_peak_8296	chr10	85023052	85023315	NA	NA	0,1	NA	NA	NA	4.36326e-05
aggregated_scATAC_peak_8400	chr10	87546150	87546879	PeakInsideFeature	24719	1	ENSMUSG00000020051	Pah	protein_coding	1.11495e-07
aggregated_scATAC_peak_8415	chr10	88249881	88250343	downstream	23119	1	ENSMUSG00000112259	Gm17980	processed_pseudogene	1.023e-05
aggregated_scATAC_peak_8541	chr10	93517572	93518161	downstream	22167	1	ENSMUSG00000015890	Amdhd1	protein_coding	6.18803e-05
aggregated_scATAC_peak_8552	chr10	93623738	93624125	PeakInsideFeature	5070	1	ENSMUSG00000111366	AC124585.1	lincRNA	2.05235e-06
aggregated_scATAC_peak_8643	chr10	95314053	95314423	PeakInsideFeature	615	0	ENSMUSG00000112744	AC153366.2	TEC	2.60868e-05
aggregated_scATAC_peak_8691	chr10	95918838	95919038	downstream	20335	1	ENSMUSG00000077268	Gm24433	snoRNA	1.71917e-05
aggregated_scATAC_peak_8736	chr10	98030381	98030801	NA	NA	0,1	NA	NA	NA	3.6491e-06
aggregated_scATAC_peak_8790	chr10	99614728	99615182	PeakInsideFeature	5784	1	ENSMUSG00000111962	Gm20110	lincRNA	8.26655e-06
aggregated_scATAC_peak_8798	chr10	99894026	99894315	upstream	28150	1	ENSMUSG00000112463	AC158633.1	processed_pseudogene	6.09038e-05
aggregated_scATAC_peak_8799	chr10	99902416	99903179	upstream	36778	1	ENSMUSG00000112463	AC158633.1	processed_pseudogene	1.36208e-05
aggregated_scATAC_peak_8854	chr10	107687419	107687713	PeakInsideFeature	32485	1	ENSMUSG00000035916	Ptprq	protein_coding	1.08985e-08
aggregated_scATAC_peak_9132	chr10	117455526	117456260	upstream	8400	1	ENSMUSG00000112344	Gm32141	lincRNA	2.98001e-05
aggregated_scATAC_peak_9144	chr10	117575606	117575921	downstream	13571	1	ENSMUSG00000112081	Gm9004	processed_pseudogene	3.70426e-06
aggregated_scATAC_peak_9152	chr10	117663636	117664356	upstream	1608	0	ENSMUSG00000096357	Gm25709	snRNA	5.14711e-05
aggregated_scATAC_peak_9270	chr10	120356721	120357059	upstream	7267	1	ENSMUSG00000034764	1700006J14Rik	antisense_RNA	6.73571e-05
aggregated_scATAC_peak_9271	chr10	120369285	120369917	PeakInsideFeature	5444	1	ENSMUSG00000034764	1700006J14Rik	antisense_RNA	4.64857e-11
aggregated_scATAC_peak_9276	chr10	120391102	120391801	PeakInsideFeature	1929	0	ENSMUSG00000090191	9230105E05Rik	antisense_RNA	2.00504e-06
aggregated_scATAC_peak_9281	chr10	120432785	120433737	downstream	14849	1	ENSMUSG00000076448	Mir763	miRNA	2.08658e-07
aggregated_scATAC_peak_9367	chr10	121454704	121455660	PeakInsideFeature	7512	1	ENSMUSG00000112009	AC140264.1	sense_intronic	1.19286e-10
aggregated_scATAC_peak_9410	chr10	122408813	122409375	PeakInsideFeature	22202	1	ENSMUSG00000112774	Gm36041	lincRNA	1.81186e-10
aggregated_scATAC_peak_9441	chr10	122900120	122900779	NA	NA	0,1	NA	NA	NA	2.25487e-07
aggregated_scATAC_peak_9623	chr10	127763836	127764518	PeakInsideFeature	4390	1	ENSMUSG00000099009	Rdh16f1	protein_coding	3.16085e-05
aggregated_scATAC_peak_9721	chr10	128964880	128965336	upstream	4120	0	ENSMUSG00000025347	Mettl7b	protein_coding	1.54473e-05
aggregated_scATAC_peak_9808	chr11	3983332	3984684	overlapStart	372	0	ENSMUSG00000049721	Gal3st1	protein_coding	2.32472e-06
aggregated_scATAC_peak_9853	chr11	4604485	4604816	upstream	9787	1	ENSMUSG00000034354	Mtmr3	protein_coding	3.17714e-05
aggregated_scATAC_peak_9876	chr11	4806065	4806345	PeakInsideFeature	43331	1	ENSMUSG00000009073	Nf2	protein_coding	4.52688e-05
aggregated_scATAC_peak_9905	chr11	5119721	5119921	upstream	20555	1	ENSMUSG00000009079	Ewsr1	protein_coding	9.59778e-09
aggregated_scATAC_peak_10082	chr11	8503534	8504412	NA	NA	0,1	NA	NA	NA	1.02717e-06
aggregated_scATAC_peak_10088	chr11	8582503	8582955	NA	NA	0,1	NA	NA	NA	3.48524e-05
aggregated_scATAC_peak_10092	chr11	8634774	8635140	PeakInsideFeature	29578	1	ENSMUSG00000020422	Tns3	protein_coding	6.55117e-05
aggregated_scATAC_peak_10140	chr11	11492063	11492325	upstream	29786	1	ENSMUSG00000020193	Zpbp	protein_coding	4.46993e-05
aggregated_scATAC_peak_10184	chr11	12532207	12532765	NA	NA	0,1	NA	NA	NA	1.67929e-05
aggregated_scATAC_peak_10282	chr11	19850685	19851654	NA	NA	0,1	NA	NA	NA	1.9311e-06
aggregated_scATAC_peak_10312	chr11	20278714	20279196	downstream	11428	1	ENSMUSG00000083792	Rpl12-ps2	processed_pseudogene	1.63539e-09
aggregated_scATAC_peak_10476	chr11	24685965	24686295	upstream	6419	1	ENSMUSG00000080631	Gm25507	miRNA	1.59767e-08
aggregated_scATAC_peak_10504	chr11	28655233	28655771	upstream	26062	1	ENSMUSG00000084966	2810471M01Rik	lincRNA	7.33476e-08
aggregated_scATAC_peak_10585	chr11	31821995	31822507	PeakInsideFeature	2273	0	ENSMUSG00000085772	D630024D03Rik	lincRNA	9.59631e-05
aggregated_scATAC_peak_10589	chr11	31888300	31888619	PeakInsideFeature	16249	1	ENSMUSG00000020300	Cpeb4	protein_coding	4.349e-07
aggregated_scATAC_peak_10679	chr11	33309450	33309659	upstream	32817	1	ENSMUSG00000098456	Gm12117	protein_coding	3.64264e-07
aggregated_scATAC_peak_10821	chr11	35951479	35952040	PeakInsideFeature	28767	1	ENSMUSG00000018849	Wwc1	protein_coding	3.27112e-09
aggregated_scATAC_peak_10868	chr11	39953928	39954344	NA	NA	0,1	NA	NA	NA	1.74488e-06
aggregated_scATAC_peak_10954	chr11	44554383	44554872	upstream	31689	1	ENSMUSG00000086501	4930597A21Rik	lincRNA	4.89506e-07
aggregated_scATAC_peak_11072	chr11	49107672	49108022	downstream	7027	1	ENSMUSG00000047511	Olfr1396	protein_coding	1.10062e-05
aggregated_scATAC_peak_11074	chr11	49128335	49128679	upstream	13633	1	ENSMUSG00000047511	Olfr1396	protein_coding	1.27806e-07
aggregated_scATAC_peak_11168	chr11	51013685	51013891	upstream	448	0	ENSMUSG00000059397	Olfr54	protein_coding	4.93099e-06
aggregated_scATAC_peak_11187	chr11	51470345	51471344	NA	NA	0,1	NA	NA	NA	2.32581e-05
aggregated_scATAC_peak_11345	chr11	53797469	53797912	upstream	24503	1	ENSMUSG00000091191	Gm17334	protein_coding	2.62533e-08
aggregated_scATAC_peak_11366	chr11	54060291	54060764	PeakInsideFeature	8486	1	ENSMUSG00000020388	Pdlim4	protein_coding	2.74739e-05
aggregated_scATAC_peak_11369	chr11	54080406	54080699	upstream	11538	1	ENSMUSG00000020388	Pdlim4	protein_coding	1.21622e-06
aggregated_scATAC_peak_11395	chr11	54673950	54674241	upstream	15523	1	ENSMUSG00000093341	Gm26116	miRNA	2.14218e-09
aggregated_scATAC_peak_11431	chr11	55036657	55036906	upstream	3337	0	ENSMUSG00000018340	Anxa6	protein_coding	1.61979e-05
aggregated_scATAC_peak_11692	chr11	59965793	59966084	upstream	994	0	ENSMUSG00000049892	Rasd1	protein_coding	1.30499e-05
aggregated_scATAC_peak_11728	chr11	60308522	60309485	upstream	6180	1	ENSMUSG00000098349	Gm27711	miRNA	7.52521e-10
aggregated_scATAC_peak_11755	chr11	60825190	60825574	upstream	5249	1	ENSMUSG00000042569	Dhrs7b	protein_coding	1.46267e-07
aggregated_scATAC_peak_11784	chr11	61234713	61235194	downstream	27417	1	ENSMUSG00000019102	Aldh3a1	protein_coding	3.08425e-09
aggregated_scATAC_peak_11874	chr11	62945607	62945836	downstream	5357	1	ENSMUSG00000087039	Cdrt4os2	antisense_RNA	4.59139e-10
aggregated_scATAC_peak_11884	chr11	63039906	63040462	upstream	21470	1	ENSMUSG00000042189	Tekt3	protein_coding	4.55299e-05
aggregated_scATAC_peak_11905	chr11	63458177	63458778	downstream	45309	1	ENSMUSG00000085113	B130011K05Rik	lincRNA	1.81407e-07
aggregated_scATAC_peak_11913	chr11	63664546	63665751	NA	NA	0,1	NA	NA	NA	2.04924e-10
aggregated_scATAC_peak_11957	chr11	64315112	64315405	NA	NA	0,1	NA	NA	NA	1.44477e-05
aggregated_scATAC_peak_11969	chr11	64541230	64542090	downstream	48980	1	ENSMUSG00000080430	Gm24275	miRNA	3.2723e-08
aggregated_scATAC_peak_11970	chr11	64542348	64542831	downstream	48050	1	ENSMUSG00000080430	Gm24275	miRNA	2.23205e-06
aggregated_scATAC_peak_11973	chr11	64617889	64618522	upstream	27566	1	ENSMUSG00000080430	Gm24275	miRNA	5.47172e-08
aggregated_scATAC_peak_12548	chr11	74536079	74536803	NA	NA	0,1	NA	NA	NA	7.41259e-07
aggregated_scATAC_peak_12610	chr11	75318550	75319571	overlapStart	452	0	ENSMUSG00000106179	AL603834.1	miRNA	9.66012e-05
aggregated_scATAC_peak_12615	chr11	75439431	75439744	overlapStart	3	0	ENSMUSG00000038224	Serpinf2	protein_coding	6.27269e-06
aggregated_scATAC_peak_12616	chr11	75443693	75444586	upstream	4549	0	ENSMUSG00000038224	Serpinf2	protein_coding	1.10195e-06
aggregated_scATAC_peak_12657	chr11	75905050	75905339	PeakInsideFeature	33235	1	ENSMUSG00000020847	Rph3al	protein_coding	1.16733e-05
aggregated_scATAC_peak_12661	chr11	75926430	75926824	PeakInsideFeature	11802	1	ENSMUSG00000020847	Rph3al	protein_coding	1.72733e-08
aggregated_scATAC_peak_12672	chr11	76070292	76070530	upstream	42629	1	ENSMUSG00000020846	Rflnb	protein_coding	1.87e-05
aggregated_scATAC_peak_12706	chr11	76474481	76474753	upstream	39452	1	ENSMUSG00000080763	Gm12341	processed_pseudogene	5.06284e-06
aggregated_scATAC_peak_12707	chr11	76476859	76477701	upstream	36789	1	ENSMUSG00000080763	Gm12341	processed_pseudogene	2.6172e-09
aggregated_scATAC_peak_12710	chr11	76489391	76489666	upstream	24541	1	ENSMUSG00000080763	Gm12341	processed_pseudogene	7.14951e-06
aggregated_scATAC_peak_12792	chr11	77772149	77772732	PeakInsideFeature	9194	1	ENSMUSG00000000631	Myo18a	protein_coding	3.18865e-05
aggregated_scATAC_peak_12836	chr11	78135388	78135647	downstream	13920	1	ENSMUSG00000060727	Gm12571	processed_pseudogene	9.21969e-05
aggregated_scATAC_peak_12860	chr11	78377629	78378124	PeakInsideFeature	8682	1	ENSMUSG00000002057	Foxn1	protein_coding	3.06353e-09
aggregated_scATAC_peak_13043	chr11	80730890	80731299	PeakInsideFeature	48931	1	ENSMUSG00000035441	Myo1d	protein_coding	6.62741e-07
aggregated_scATAC_peak_13045	chr11	80784262	80784608	upstream	4410	0	ENSMUSG00000035441	Myo1d	protein_coding	5.05043e-06
aggregated_scATAC_peak_13071	chr11	81299001	81300088	NA	NA	0,1	NA	NA	NA	3.10203e-07
aggregated_scATAC_peak_13142	chr11	82833073	82833285	PeakInsideFeature	38031	1	ENSMUSG00000020696	Rffl	protein_coding	3.86548e-05
aggregated_scATAC_peak_13143	chr11	82833617	82834206	PeakInsideFeature	37298	1	ENSMUSG00000020696	Rffl	protein_coding	7.09145e-07
aggregated_scATAC_peak_13208	chr11	83882557	83883343	PeakInsideFeature	32887	1	ENSMUSG00000020679	Hnf1b	protein_coding	2.84717e-10
aggregated_scATAC_peak_13209	chr11	83885188	83885507	PeakInsideFeature	35285	1	ENSMUSG00000020679	Hnf1b	protein_coding	1.18672e-06
aggregated_scATAC_peak_13211	chr11	83902587	83903413	upstream	39062	1	ENSMUSG00000020677	Ddx52	protein_coding	4.44441e-09
aggregated_scATAC_peak_13212	chr11	83908266	83908864	upstream	33497	1	ENSMUSG00000020677	Ddx52	protein_coding	1.73829e-08
aggregated_scATAC_peak_13213	chr11	83913743	83914413	upstream	27984	1	ENSMUSG00000020677	Ddx52	protein_coding	2.66512e-08
aggregated_scATAC_peak_13226	chr11	84079980	84080265	upstream	10861	1	ENSMUSG00000018648	Dusp14	protein_coding	9.57276e-05
aggregated_scATAC_peak_13234	chr11	84172597	84172887	upstream	5266	1	ENSMUSG00000051452	Gm11437	protein_coding	6.34022e-06
aggregated_scATAC_peak_13239	chr11	84361610	84361840	NA	NA	0,1	NA	NA	NA	9.99952e-05
aggregated_scATAC_peak_13253	chr11	84538436	84539130	downstream	13123	1	ENSMUSG00000087211	Lhx1os	lincRNA	1.51364e-05
aggregated_scATAC_peak_13351	chr11	85775364	85776723	overlapStart	364	0	ENSMUSG00000085514	Bcas3os2	antisense_RNA	6.73854e-07
aggregated_scATAC_peak_13356	chr11	85812697	85812936	PeakInsideFeature	19407	1	ENSMUSG00000087013	2610027K06Rik	processed_transcript	1.85074e-05
aggregated_scATAC_peak_13426	chr11	86911801	86912223	NA	NA	0,1	NA	NA	NA	2.28658e-07
aggregated_scATAC_peak_13454	chr11	87436476	87437137	upstream	6431	1	ENSMUSG00000098943	Rnu3b1	snoRNA	1.34082e-05
aggregated_scATAC_peak_13463	chr11	87489728	87490243	downstream	18618	1	ENSMUSG00000105115	Rnu3b2	snoRNA	1.44894e-06
aggregated_scATAC_peak_13480	chr11	87696921	87697768	upstream	2763	0	ENSMUSG00000087792	Gm25968	snRNA	1.05612e-08
aggregated_scATAC_peak_13604	chr11	88682049	88682372	PeakInsideFeature	36303	1	ENSMUSG00000069769	Msi2	protein_coding	1.22116e-07
aggregated_scATAC_peak_13608	chr11	88695174	88695404	PeakInsideFeature	23224	1	ENSMUSG00000069769	Msi2	protein_coding	2.57812e-05
aggregated_scATAC_peak_13609	chr11	88695510	88695812	PeakInsideFeature	22852	1	ENSMUSG00000069769	Msi2	protein_coding	1.5402e-05
aggregated_scATAC_peak_13653	chr11	89264864	89265505	downstream	37148	1	ENSMUSG00000048616	Nog	protein_coding	5.23409e-07
aggregated_scATAC_peak_13708	chr11	90356090	90357178	PeakInsideFeature	34261	1	ENSMUSG00000003949	Hlf	protein_coding	4.15137e-08
aggregated_scATAC_peak_13721	chr11	90678629	90678881	PeakInsideFeature	9611	1	ENSMUSG00000020541	Tom1l1	protein_coding	6.19871e-09
aggregated_scATAC_peak_13733	chr11	93064731	93065296	upstream	33014	1	ENSMUSG00000056158	Car10	protein_coding	1.04352e-09
aggregated_scATAC_peak_13790	chr11	94464382	94464680	PeakInsideFeature	9667	1	ENSMUSG00000020866	Cacna1g	protein_coding	3.70229e-07
aggregated_scATAC_peak_13872	chr11	95126279	95127187	downstream	6614	1	ENSMUSG00000001510	Dlx3	protein_coding	7.31423e-08
aggregated_scATAC_peak_13880	chr11	95189765	95190354	downstream	13247	1	ENSMUSG00000083548	Gm11514	processed_pseudogene	5.45634e-05
aggregated_scATAC_peak_13954	chr11	95921906	95922609	downstream	1156	0	ENSMUSG00000088854	Gm24725	snRNA	3.70733e-09
aggregated_scATAC_peak_13976	chr11	96140674	96141249	PeakInsideFeature	7176	1	ENSMUSG00000038756	Ttll6	protein_coding	5.56118e-07
aggregated_scATAC_peak_13997	chr11	96283062	96284270	PeakInsideFeature	1761	0	ENSMUSG00000056648	Hoxb8	protein_coding	5.77024e-08
aggregated_scATAC_peak_14007	chr11	96306632	96307230	overlapStart	21	0	ENSMUSG00000085645	Hoxb5os	antisense_RNA	1.30058e-05
aggregated_scATAC_peak_14063	chr11	96700298	96700575	downstream	47000	1	ENSMUSG00000097289	2010300F17Rik	lincRNA	1.63402e-07
aggregated_scATAC_peak_14266	chr11	98364495	98364733	PeakInsideFeature	6246	1	ENSMUSG00000018167	Stard3	protein_coding	6.18834e-09
aggregated_scATAC_peak_14272	chr11	98400920	98401140	upstream	540	0	ENSMUSG00000038208	Pgap3	protein_coding	9.92179e-05
aggregated_scATAC_peak_14280	chr11	98447961	98448664	PeakInsideFeature	1918	0	ENSMUSG00000019312	Grb7	protein_coding	1.07417e-09
aggregated_scATAC_peak_14364	chr11	99069281	99069570	PeakInsideFeature	19880	1	ENSMUSG00000017607	Tns4	protein_coding	4.35995e-05
aggregated_scATAC_peak_14368	chr11	99089248	99089570	overlapStart	103	0	ENSMUSG00000017607	Tns4	protein_coding	1.82185e-05
aggregated_scATAC_peak_14401	chr11	99516679	99516889	PeakInsideFeature	4554	0	ENSMUSG00000064165	Krt39	protein_coding	7.1515e-06
aggregated_scATAC_peak_14410	chr11	99993620	99994677	overlapStart	154	0	ENSMUSG00000078252	Krtap17-1	protein_coding	4.2775e-08
aggregated_scATAC_peak_14424	chr11	100159315	100159992	upstream	10989	1	ENSMUSG00000020911	Krt19	protein_coding	5.92088e-10
aggregated_scATAC_peak_14563	chr11	101362215	101362904	upstream	5001	1	ENSMUSG00000078650	G6pc	protein_coding	5.36312e-08
aggregated_scATAC_peak_14594	chr11	101713498	101713698	upstream	19321	1	ENSMUSG00000034931	Dhx8	protein_coding	2.72386e-05
aggregated_scATAC_peak_14656	chr11	102175140	102175501	PeakInsideFeature	9976	1	ENSMUSG00000020922	Lsm12	protein_coding	6.73644e-05
aggregated_scATAC_peak_14686	chr11	102381383	102382065	upstream	4704	0	ENSMUSG00000087330	Bloodlinc	lincRNA	1.59438e-06
aggregated_scATAC_peak_14871	chr11	104358179	104358928	NA	NA	0,1	NA	NA	NA	5.03185e-06
aggregated_scATAC_peak_15027	chr11	107292078	107292347	upstream	38496	1	ENSMUSG00000081995	Gm11719	processed_pseudogene	4.81372e-11
aggregated_scATAC_peak_15030	chr11	107337255	107337886	upstream	480	0	ENSMUSG00000086298	Gm11716	antisense_RNA	1.99677e-05
aggregated_scATAC_peak_15080	chr11	108197659	108198036	downstream	15998	1	ENSMUSG00000084978	Gm11655	antisense_RNA	9.43659e-06
aggregated_scATAC_peak_15081	chr11	108210900	108211355	downstream	29278	1	ENSMUSG00000084978	Gm11655	antisense_RNA	1.88835e-07
aggregated_scATAC_peak_15084	chr11	108251232	108251614	NA	NA	0,1	NA	NA	NA	1.16083e-05
aggregated_scATAC_peak_15121	chr11	109106197	109106583	downstream	37979	1	ENSMUSG00000078605	E030025P04Rik	protein_coding	1.49246e-05
aggregated_scATAC_peak_15175	chr11	109933020	109933671	upstream	2970	0	ENSMUSG00000085629	Gm11697	antisense_RNA	4.94163e-06
aggregated_scATAC_peak_15180	chr11	110029038	110029804	upstream	33576	1	ENSMUSG00000020620	Abca8b	protein_coding	5.39868e-06
aggregated_scATAC_peak_15181	chr11	110167517	110167727	PeakInsideFeature	574	0	ENSMUSG00000041797	Abca9	protein_coding	2.20837e-06
aggregated_scATAC_peak_15192	chr11	110478890	110479437	NA	NA	0,1	NA	NA	NA	7.95068e-05
aggregated_scATAC_peak_15226	chr11	112763391	112763620	PeakInsideFeature	18470	1	ENSMUSG00000041674	BC006965	processed_transcript	8.99557e-08
aggregated_scATAC_peak_15228	chr11	112784388	112784700	PeakInsideFeature	2320	0	ENSMUSG00000000567	Sox9	protein_coding	6.4477e-10
aggregated_scATAC_peak_15233	chr11	112835379	112835978	downstream	10524	1	ENSMUSG00000020624	4933434M16Rik	lincRNA	2.32972e-08
aggregated_scATAC_peak_15260	chr11	113086941	113087566	NA	NA	0,1	NA	NA	NA	3.50313e-07
aggregated_scATAC_peak_15268	chr11	113147533	113148336	NA	NA	0,1	NA	NA	NA	3.66984e-07
aggregated_scATAC_peak_15278	chr11	113221216	113221824	upstream	11851	1	ENSMUSG00000085421	4732490B19Rik	lincRNA	4.92069e-09
aggregated_scATAC_peak_15279	chr11	113223770	113224171	upstream	14301	1	ENSMUSG00000085421	4732490B19Rik	lincRNA	8.61767e-05
aggregated_scATAC_peak_15311	chr11	113617237	113617863	upstream	1792	0	ENSMUSG00000047904	Sstr2	protein_coding	4.56564e-07
aggregated_scATAC_peak_15313	chr11	113643909	113644402	upstream	5013	1	ENSMUSG00000018661	Cog1	protein_coding	1.36688e-05
aggregated_scATAC_peak_15318	chr11	113666680	113667683	upstream	11348	1	ENSMUSG00000083339	Gm11693	processed_pseudogene	1.52303e-06
aggregated_scATAC_peak_15341	chr11	113934926	113935745	NA	NA	0,1	NA	NA	NA	5.52115e-05
aggregated_scATAC_peak_15343	chr11	113974504	113974749	NA	NA	0,1	NA	NA	NA	2.46014e-06
aggregated_scATAC_peak_15367	chr11	114317561	114318190	upstream	39253	1	ENSMUSG00000081548	Gm11692	processed_pseudogene	7.81817e-07
aggregated_scATAC_peak_15443	chr11	115075933	115076227	upstream	13903	1	ENSMUSG00000048498	Cd300e	protein_coding	5.80057e-05
aggregated_scATAC_peak_15453	chr11	115164458	115164843	PeakInsideFeature	1309	0	ENSMUSG00000020733	Slc9a3r1	protein_coding	1.41513e-06
aggregated_scATAC_peak_15543	chr11	115911644	115912469	overlapStart	39	0	ENSMUSG00000075420	Smim6	protein_coding	4.43616e-06
aggregated_scATAC_peak_15638	chr11	116818792	116819202	PeakInsideFeature	9049	1	ENSMUSG00000020814	Mxra7	protein_coding	3.71674e-06
aggregated_scATAC_peak_15652	chr11	116962820	116963415	PeakInsideFeature	44255	1	ENSMUSG00000043857	Mgat5b	protein_coding	6.86475e-09
aggregated_scATAC_peak_15878	chr11	118898225	118898811	PeakInsideFeature	13079	1	ENSMUSG00000025576	Rbfox3	protein_coding	2.02814e-05
aggregated_scATAC_peak_15908	chr11	119103319	119103974	downstream	7779	1	ENSMUSG00000086306	Gm11754	lincRNA	4.04132e-06
aggregated_scATAC_peak_15914	chr11	119130289	119130725	PeakInsideFeature	7914	1	ENSMUSG00000086547	Gm11755	lincRNA	9.26475e-05
aggregated_scATAC_peak_16000	chr11	120028343	120028645	upstream	13632	1	ENSMUSG00000065600	Mir338	miRNA	3.70557e-05
aggregated_scATAC_peak_16069	chr11	120539010	120539981	upstream	7712	1	ENSMUSG00000084983	Gm11789	antisense_RNA	1.10261e-07
aggregated_scATAC_peak_16111	chr11	120929026	120929296	PeakInsideFeature	3711	0	ENSMUSG00000048445	Ccdc57	protein_coding	7.11425e-06
aggregated_scATAC_peak_16132	chr11	121226063	121226391	PeakInsideFeature	3095	0	ENSMUSG00000039294	BC017643	protein_coding	7.6235e-06
aggregated_scATAC_peak_16194	chr12	3758140	3758581	PeakInsideFeature	3786	0	ENSMUSG00000092286	Dtnbos	antisense_RNA	1.04418e-06
aggregated_scATAC_peak_16238	chr12	4534374	4534577	downstream	10363	1	ENSMUSG00000112422	Gm31938	lincRNA	9.73807e-06
aggregated_scATAC_peak_16287	chr12	5806612	5806812	upstream	1483	0	ENSMUSG00000112404	AC159282.1	lincRNA	2.7398e-05
aggregated_scATAC_peak_16296	chr12	7820294	7820755	PeakInsideFeature	39242	1	ENSMUSG00000112323	Gm32828	lincRNA	1.34746e-06
aggregated_scATAC_peak_16334	chr12	8510247	8510642	upstream	757	0	ENSMUSG00000112276	5033421B08Rik	antisense_RNA	3.5526e-10
aggregated_scATAC_peak_16376	chr12	9168939	9169445	NA	NA	0,1	NA	NA	NA	9.48001e-07
aggregated_scATAC_peak_16403	chr12	10410931	10411140	downstream	20264	1	ENSMUSG00000020621	Rdh14	protein_coding	2.90152e-08
aggregated_scATAC_peak_16424	chr12	11753849	11755022	downstream	6435	1	ENSMUSG00000112413	Gm6867	processed_pseudogene	4.1441e-06
aggregated_scATAC_peak_16445	chr12	12541078	12542073	NA	NA	0,1	NA	NA	NA	3.27034e-06
aggregated_scATAC_peak_16458	chr12	12756454	12757035	upstream	31241	1	ENSMUSG00000091430	Platr19	lincRNA	1.49239e-12
aggregated_scATAC_peak_16507	chr12	14183686	14184007	upstream	31792	1	ENSMUSG00000020607	Fam84a	protein_coding	2.40843e-08
aggregated_scATAC_peak_16538	chr12	16726158	16726639	downstream	40825	1	ENSMUSG00000105567	Gm44305	miRNA	4.4568e-08
aggregated_scATAC_peak_16542	chr12	16752285	16753601	downstream	14280	1	ENSMUSG00000105567	Gm44305	miRNA	7.41553e-07
aggregated_scATAC_peak_16547	chr12	16778399	16778855	upstream	11404	1	ENSMUSG00000105567	Gm44305	miRNA	7.66716e-05
aggregated_scATAC_peak_16656	chr12	21166093	21166423	NA	NA	0,1	NA	NA	NA	1.37009e-06
aggregated_scATAC_peak_16658	chr12	21173388	21173772	NA	NA	0,1	NA	NA	NA	1.6014e-07
aggregated_scATAC_peak_16664	chr12	21247650	21248161	downstream	8046	1	ENSMUSG00000092373	Gm20535	processed_transcript	8.7479e-07
aggregated_scATAC_peak_16712	chr12	24686153	24686725	upstream	4626	0	ENSMUSG00000062563	Cys1	protein_coding	5.9558e-06
aggregated_scATAC_peak_16752	chr12	25129065	25130160	overlapStart	438	0	ENSMUSG00000112937	Gm17746	lincRNA	1.50041e-07
aggregated_scATAC_peak_16753	chr12	25140093	25140552	upstream	10593	1	ENSMUSG00000113587	Gm36287	lincRNA	6.31981e-08
aggregated_scATAC_peak_16764	chr12	25303683	25304155	overlapStart	21	0	ENSMUSG00000113669	AC163354.1	lincRNA	7.22742e-07
aggregated_scATAC_peak_16774	chr12	25838229	25838434	upstream	17791	1	ENSMUSG00000114111	Gm9321	processed_pseudogene	2.16819e-10
aggregated_scATAC_peak_16823	chr12	27507897	27508192	NA	NA	0,1	NA	NA	NA	7.17133e-07
aggregated_scATAC_peak_16959	chr12	31294247	31295281	PeakInsideFeature	29530	1	ENSMUSG00000002900	Lamb1	protein_coding	1.39459e-07
aggregated_scATAC_peak_16991	chr12	31990639	31990917	upstream	40243	1	ENSMUSG00000002996	Hbp1	protein_coding	4.79108e-05
aggregated_scATAC_peak_17037	chr12	33073690	33073984	downstream	11396	1	ENSMUSG00000092931	Gm22904	miRNA	2.21437e-05
aggregated_scATAC_peak_17123	chr12	36599268	36600114	NA	NA	0,1	NA	NA	NA	3.38247e-06
aggregated_scATAC_peak_17147	chr12	40147339	40147750	upstream	13316	1	ENSMUSG00000002565	Scin	protein_coding	9.50324e-06
aggregated_scATAC_peak_17152	chr12	40247364	40247814	PeakInsideFeature	915	0	ENSMUSG00000001627	Ifrd1	protein_coding	3.11543e-09
aggregated_scATAC_peak_17167	chr12	40794765	40795085	NA	NA	0,1	NA	NA	NA	9.54236e-06
aggregated_scATAC_peak_17195	chr12	44581449	44581671	downstream	41102	1	ENSMUSG00000112823	Gm6125	processed_pseudogene	3.21009e-06
aggregated_scATAC_peak_17243	chr12	51492666	51493054	upstream	24466	1	ENSMUSG00000111959	Gm18503	processed_pseudogene	2.30508e-06
aggregated_scATAC_peak_17316	chr12	53757476	53757764	NA	NA	0,1	NA	NA	NA	2.91947e-09
aggregated_scATAC_peak_17483	chr12	57572515	57572741	PeakInsideFeature	8515	1	ENSMUSG00000046782	Ttc6	protein_coding	6.35464e-05
aggregated_scATAC_peak_17507	chr12	59095228	59095860	overlapStart	255	0	ENSMUSG00000021000	Ctage5	protein_coding	1.49727e-06
aggregated_scATAC_peak_17511	chr12	59663230	59663495	downstream	2422	1	ENSMUSG00000077586	Gm24377	snoRNA	1.04195e-06
aggregated_scATAC_peak_17603	chr12	70068709	70069251	upstream	44594	1	ENSMUSG00000114099	AC112146.1	bidirectional_promoter_lncRNA	1.025e-06
aggregated_scATAC_peak_17631	chr12	70702082	70702439	upstream	20410	1	ENSMUSG00000112950	Gm32369	lincRNA	1.8619e-05
aggregated_scATAC_peak_17633	chr12	70729820	70730675	upstream	48398	1	ENSMUSG00000112950	Gm32369	lincRNA	4.93643e-07
aggregated_scATAC_peak_17634	chr12	70731403	70731800	upstream	49752	1	ENSMUSG00000112950	Gm32369	lincRNA	6.70729e-05
aggregated_scATAC_peak_17673	chr12	71405191	71405794	upstream	21284	1	ENSMUSG00000100668	1700083H02Rik	lincRNA	1.63029e-08
aggregated_scATAC_peak_17717	chr12	71976802	71977104	NA	NA	0,1	NA	NA	NA	6.36058e-05
aggregated_scATAC_peak_17724	chr12	72053863	72054363	upstream	4854	0	ENSMUSG00000114155	Gm7986	processed_pseudogene	3.63341e-05
aggregated_scATAC_peak_17831	chr12	73867553	73868006	upstream	33595	1	ENSMUSG00000021109	Hif1a	protein_coding	2.94875e-05
aggregated_scATAC_peak_17867	chr12	75834397	75834622	PeakInsideFeature	16376	1	ENSMUSG00000063450	Syne2	protein_coding	4.60267e-05
aggregated_scATAC_peak_17988	chr12	78110003	78110237	NA	NA	0,1	NA	NA	NA	5.37917e-06
aggregated_scATAC_peak_18027	chr12	79385334	79385559	NA	NA	0,1	NA	NA	NA	6.5544e-07
aggregated_scATAC_peak_18039	chr12	79541534	79541944	NA	NA	0,1	NA	NA	NA	7.36824e-07
aggregated_scATAC_peak_18046	chr12	79664276	79664507	NA	NA	0,1	NA	NA	NA	1.87508e-08
aggregated_scATAC_peak_18063	chr12	79816077	79816859	NA	NA	0,1	NA	NA	NA	1.23751e-05
aggregated_scATAC_peak_18084	chr12	79963639	79963951	downstream	16056	1	ENSMUSG00000112292	Gm8275	processed_pseudogene	2.97035e-08
aggregated_scATAC_peak_18091	chr12	80004601	80004917	upstream	24908	1	ENSMUSG00000112292	Gm8275	processed_pseudogene	6.61078e-07
aggregated_scATAC_peak_18100	chr12	80065489	80065898	PeakInsideFeature	15740	1	ENSMUSG00000111933	Gm36660	lincRNA	4.49512e-10
aggregated_scATAC_peak_18119	chr12	80210854	80211573	PeakInsideFeature	1971	0	ENSMUSG00000112852	CT030161.3	antisense_RNA	1.6384e-06
aggregated_scATAC_peak_18156	chr12	80691689	80692047	PeakInsideFeature	598	0	ENSMUSG00000044062	Plekhd1os	antisense_RNA	1.52434e-05
aggregated_scATAC_peak_18160	chr12	80724874	80725510	downstream	32601	1	ENSMUSG00000066438	Plekhd1	protein_coding	3.34505e-06
aggregated_scATAC_peak_18180	chr12	80991474	80991735	upstream	22899	1	ENSMUSG00000021135	Slc10a1	protein_coding	3.15135e-05
aggregated_scATAC_peak_18189	chr12	81140676	81141887	upstream	24869	1	ENSMUSG00000092673	Mir3067	miRNA	1.6895e-05
aggregated_scATAC_peak_18191	chr12	81166083	81166513	FeatureInsidePeak	147	0	ENSMUSG00000092673	Mir3067	miRNA	6.94488e-05
aggregated_scATAC_peak_18222	chr12	81883381	81884325	PeakInsideFeature	23830	1	ENSMUSG00000021140	Pcnx	protein_coding	9.19363e-08
aggregated_scATAC_peak_18243	chr12	82455713	82456679	downstream	40341	1	ENSMUSG00000094374	Gm5435	processed_pseudogene	1.78462e-05
aggregated_scATAC_peak_18344	chr12	84355039	84355537	upstream	6369	1	ENSMUSG00000021235	Coq6	protein_coding	7.54654e-05
aggregated_scATAC_peak_18420	chr12	85298495	85298873	PeakInsideFeature	10093	1	ENSMUSG00000045064	Zc2hc1c	protein_coding	5.85726e-06
aggregated_scATAC_peak_18433	chr12	85451809	85452090	upstream	15701	1	ENSMUSG00000113940	Gm40477	lincRNA	3.36198e-06
aggregated_scATAC_peak_18448	chr12	85548236	85548445	downstream	18742	1	ENSMUSG00000114163	Gm32296	lincRNA	2.45497e-06
aggregated_scATAC_peak_18450	chr12	85569771	85569985	upstream	29149	1	ENSMUSG00000034271	Jdp2	protein_coding	7.49434e-05
aggregated_scATAC_peak_18467	chr12	85725370	85725856	upstream	2844	0	ENSMUSG00000113464	AC117240.2	processed_pseudogene	4.52919e-05
aggregated_scATAC_peak_18511	chr12	86234344	86235030	upstream	7171	1	ENSMUSG00000021254	Gpatch2l	protein_coding	6.13285e-07
aggregated_scATAC_peak_18516	chr12	86320334	86320573	upstream	14448	1	ENSMUSG00000097488	4732487G21Rik	lincRNA	7.74857e-05
aggregated_scATAC_peak_18670	chr12	95652355	95652814	upstream	31612	1	ENSMUSG00000112769	Rpl17-ps2	processed_pseudogene	9.02843e-09
aggregated_scATAC_peak_18712	chr12	99206900	99207570	upstream	38436	1	ENSMUSG00000093419	Gm19898	processed_pseudogene	8.20288e-11
aggregated_scATAC_peak_18722	chr12	99342211	99342762	PeakInsideFeature	1332	0	ENSMUSG00000033731	3300002A11Rik	antisense_RNA	1.32026e-05
aggregated_scATAC_peak_18772	chr12	100282143	100282905	PeakInsideFeature	5915	1	ENSMUSG00000113679	Gm10432	processed_transcript	1.63651e-08
aggregated_scATAC_peak_18838	chr12	102263755	102263970	upstream	10175	1	ENSMUSG00000064776	Gm25203	snoRNA	7.30956e-05
aggregated_scATAC_peak_18921	chr12	103631011	103631844	overlapStart	16	0	ENSMUSG00000061947	Serpina10	protein_coding	2.7054e-06
aggregated_scATAC_peak_18926	chr12	103737887	103738686	downstream	16447	1	ENSMUSG00000090989	Gm17042	unprocessed_pseudogene	4.62535e-08
aggregated_scATAC_peak_18927	chr12	103773633	103774017	upstream	233	0	ENSMUSG00000071177	Serpina1d	protein_coding	1.47109e-06
aggregated_scATAC_peak_18940	chr12	104184280	104184754	upstream	6221	1	ENSMUSG00000091573	Serpina3d-ps	unprocessed_pseudogene	2.34105e-05
aggregated_scATAC_peak_18981	chr12	104855404	104855876	upstream	1731	0	ENSMUSG00000021101	4930408O17Rik	lincRNA	3.7895e-08
aggregated_scATAC_peak_19042	chr12	105510621	105510932	upstream	2704	0	ENSMUSG00000113535	AU015791	lincRNA	5.2144e-05
aggregated_scATAC_peak_19129	chr12	107648002	107648394	downstream	35198	1	ENSMUSG00000079359	Gm9006	processed_pseudogene	2.83947e-05
aggregated_scATAC_peak_19136	chr12	107748449	107748781	upstream	13119	1	ENSMUSG00000085641	4930465M20Rik	lincRNA	2.23833e-06
aggregated_scATAC_peak_19162	chr12	108037269	108037973	upstream	34019	1	ENSMUSG00000048251	Bcl11b	protein_coding	5.0406e-08
aggregated_scATAC_peak_19221	chr12	108694776	108695032	upstream	582	0	ENSMUSG00000113396	Gm33467	antisense_RNA	7.02983e-05
aggregated_scATAC_peak_19310	chr12	110206340	110207506	upstream	18862	1	ENSMUSG00000113733	Gm34785	lincRNA	2.83075e-10
aggregated_scATAC_peak_19313	chr12	110232119	110232488	PeakInsideFeature	4058	0	ENSMUSG00000113193	Gm40576	lincRNA	1.73977e-06
aggregated_scATAC_peak_19315	chr12	110278033	110279443	overlapStart	330	0	ENSMUSG00000075707	Dio3	protein_coding	5.99106e-10
aggregated_scATAC_peak_19326	chr12	110464025	110464233	PeakInsideFeature	17009	1	ENSMUSG00000017843	Ppp2r5c	protein_coding	4.53148e-12
aggregated_scATAC_peak_19445	chr12	111842581	111842983	downstream	18354	1	ENSMUSG00000113357	Gm19195	processed_pseudogene	1.9923e-05
aggregated_scATAC_peak_19455	chr12	111936622	111937624	upstream	6086	1	ENSMUSG00000113926	Gm3565	processed_pseudogene	1.039e-05
aggregated_scATAC_peak_19500	chr12	112343348	112343696	downstream	6545	1	ENSMUSG00000103080	Gm38123	TEC	4.97375e-06
aggregated_scATAC_peak_19575	chr12	113030166	113030488	PeakInsideFeature	15819	1	ENSMUSG00000021143	Pacs2	protein_coding	5.17931e-08
aggregated_scATAC_peak_19620	chr12	116914127	116914502	NA	NA	0,1	NA	NA	NA	2.25448e-09
aggregated_scATAC_peak_19621	chr12	116987389	116987740	NA	NA	0,1	NA	NA	NA	4.62536e-09
aggregated_scATAC_peak_19649	chr12	117545292	117545749	upstream	28822	1	ENSMUSG00000089482	Gm24741	rRNA	3.40085e-06
aggregated_scATAC_peak_19676	chr12	118186110	118186439	PeakInsideFeature	12769	1	ENSMUSG00000018581	Dnah11	protein_coding	1.29544e-05
aggregated_scATAC_peak_19748	chr13	3891743	3892042	downstream	8356	1	ENSMUSG00000113128	AC139323.1	TEC	1.8547e-06
aggregated_scATAC_peak_19754	chr13	4233238	4234051	PeakInsideFeature	4944	1	ENSMUSG00000071551	Akr1c19	protein_coding	2.39357e-09
aggregated_scATAC_peak_19766	chr13	5713054	5713452	PeakInsideFeature	11257	1	ENSMUSG00000114053	AC133498.1	lincRNA	8.2924e-08
aggregated_scATAC_peak_19882	chr13	12543136	12543344	PeakInsideFeature	3097	1	ENSMUSG00000114115	Gm30239	lincRNA	2.23833e-06
aggregated_scATAC_peak_19973	chr13	18063647	18064002	downstream	25263	1	ENSMUSG00000113496	Gm6575	processed_pseudogene	6.20988e-07
aggregated_scATAC_peak_20087	chr13	21454216	21454613	upstream	684	0	ENSMUSG00000022228	Zscan26	protein_coding	1.25387e-07
aggregated_scATAC_peak_20098	chr13	21727815	21728891	downstream	6309	1	ENSMUSG00000114279	Hist1h2bm	protein_coding	5.5411e-06
aggregated_scATAC_peak_20264	chr13	24234430	24234890	downstream	38763	1	ENSMUSG00000081707	Gm11343	processed_pseudogene	1.17507e-08
aggregated_scATAC_peak_20268	chr13	24279843	24280244	PeakInsideFeature	751	0	ENSMUSG00000021338	Carmil1	protein_coding	9.33462e-05
aggregated_scATAC_peak_20315	chr13	25055805	25056386	overlapStart	92	0	ENSMUSG00000035910	Dcdc2a	protein_coding	2.58598e-06
aggregated_scATAC_peak_20336	chr13	25901415	25901734	NA	NA	0,1	NA	NA	NA	2.82004e-06
aggregated_scATAC_peak_20346	chr13	28294703	28295419	PeakInsideFeature	9492	1	ENSMUSG00000113418	AL590503.1	unprocessed_pseudogene	1.80633e-06
aggregated_scATAC_peak_20357	chr13	28654736	28655402	NA	NA	0,1	NA	NA	NA	4.96751e-05
aggregated_scATAC_peak_20395	chr13	28992150	28992738	upstream	21955	1	ENSMUSG00000086363	A330102I10Rik	lincRNA	2.88084e-05
aggregated_scATAC_peak_20495	chr13	31518342	31519017	upstream	37454	1	ENSMUSG00000038415	Foxq1	protein_coding	2.36059e-08
aggregated_scATAC_peak_20514	chr13	31760164	31760872	upstream	22778	1	ENSMUSG00000065843	Gm25186	snRNA	2.79775e-08
aggregated_scATAC_peak_20577	chr13	34055077	34055366	PeakInsideFeature	17625	1	ENSMUSG00000038286	Bphl	protein_coding	1.08847e-05
aggregated_scATAC_peak_20589	chr13	34212637	34213179	downstream	49944	1	ENSMUSG00000071451	Psmg4	protein_coding	3.80371e-06
aggregated_scATAC_peak_20592	chr13	34242279	34242559	downstream	34833	1	ENSMUSG00000088573	Gm24530	misc_RNA	9.6413e-05
aggregated_scATAC_peak_20593	chr13	34246889	34247229	downstream	30193	1	ENSMUSG00000088573	Gm24530	misc_RNA	1.62556e-05
aggregated_scATAC_peak_20599	chr13	34294104	34294588	upstream	17094	1	ENSMUSG00000088573	Gm24530	misc_RNA	1.31867e-05
aggregated_scATAC_peak_20607	chr13	34446833	34447068	upstream	20519	1	ENSMUSG00000114170	AC129019.2	processed_pseudogene	1.16901e-08
aggregated_scATAC_peak_20609	chr13	34462773	34462983	upstream	36447	1	ENSMUSG00000114170	AC129019.2	processed_pseudogene	2.55751e-05
aggregated_scATAC_peak_20677	chr13	36648267	36648747	upstream	5898	1	ENSMUSG00000077282	Gm26395	snoRNA	4.32945e-07
aggregated_scATAC_peak_20704	chr13	37564907	37565255	overlapStart	109	0	ENSMUSG00000114724	CT009713.7	lincRNA	4.53499e-08
aggregated_scATAC_peak_20738	chr13	38079296	38079730	upstream	6689	1	ENSMUSG00000098481	Gm27387	miRNA	5.39543e-06
aggregated_scATAC_peak_20757	chr13	38352005	38352397	PeakInsideFeature	7094	1	ENSMUSG00000039004	Bmp6	protein_coding	5.44052e-05
aggregated_scATAC_peak_20770	chr13	38772986	38773305	upstream	2678	0	ENSMUSG00000114845	AC132260.2	lincRNA	1.44327e-06
aggregated_scATAC_peak_20842	chr13	41423507	41424096	downstream	21511	1	ENSMUSG00000114552	AC167669.3	antisense_RNA	9.48177e-09
aggregated_scATAC_peak_20845	chr13	41458722	41459243	downstream	18918	1	ENSMUSG00000114537	CT025639.1	TEC	3.17102e-07
aggregated_scATAC_peak_20848	chr13	41511511	41511824	upstream	24306	1	ENSMUSG00000021365	Nedd9	protein_coding	4.51965e-06
aggregated_scATAC_peak_20876	chr13	42308290	42309221	upstream	3765	0	ENSMUSG00000113619	AC154635.1	antisense_RNA	9.22827e-07
aggregated_scATAC_peak_20939	chr13	43722719	43722925	downstream	6031	1	ENSMUSG00000110016	Gm20751	lincRNA	3.14652e-05
aggregated_scATAC_peak_20955	chr13	43991632	43992284	downstream	26564	1	ENSMUSG00000113252	Gm33489	lincRNA	2.11872e-05
aggregated_scATAC_peak_21035	chr13	45261656	45262437	PeakInsideFeature	5665	1	ENSMUSG00000113919	Gm34466	lincRNA	5.63105e-07
aggregated_scATAC_peak_21051	chr13	45508379	45508886	PeakInsideFeature	1188	0	ENSMUSG00000000253	Gmpr	protein_coding	2.07586e-05
aggregated_scATAC_peak_21067	chr13	45718707	45719266	upstream	30586	1	ENSMUSG00000114131	AC154733.1	antisense_RNA	3.25658e-05
aggregated_scATAC_peak_21074	chr13	45820457	45821246	NA	NA	0,1	NA	NA	NA	1.92012e-06
aggregated_scATAC_peak_21160	chr13	47311063	47311346	downstream	29735	1	ENSMUSG00000114958	AC131085.1	lincRNA	8.38348e-07
aggregated_scATAC_peak_21206	chr13	48745653	48746039	downstream	17735	1	ENSMUSG00000113297	Rpl17-ps6	processed_pseudogene	4.76491e-05
aggregated_scATAC_peak_21324	chr13	51833514	51833966	upstream	12938	1	ENSMUSG00000021453	Gadd45g	protein_coding	6.1715e-07
aggregated_scATAC_peak_21348	chr13	52060434	52060706	downstream	36098	1	ENSMUSG00000113090	CT010575.1	lincRNA	7.0233e-10
aggregated_scATAC_peak_21364	chr13	52426559	52426818	NA	NA	0,1	NA	NA	NA	3.50231e-05
aggregated_scATAC_peak_21493	chr13	54258128	54258625	downstream	13080	1	ENSMUSG00000113327	AC164086.1	lincRNA	1.66967e-07
aggregated_scATAC_peak_21510	chr13	54403577	54404177	upstream	4543	0	ENSMUSG00000086137	Gm16248	lincRNA	8.30879e-05
aggregated_scATAC_peak_21531	chr13	54701252	54701638	overlapStart	16	0	ENSMUSG00000034918	Cdhr2	protein_coding	4.98418e-06
aggregated_scATAC_peak_21569	chr13	55152505	55153503	overlapStart	364	0	ENSMUSG00000005320	Fgfr4	protein_coding	9.51657e-07
aggregated_scATAC_peak_21616	chr13	55733715	55734179	PeakInsideFeature	6579	1	ENSMUSG00000021496	Pcbd2	protein_coding	3.3411e-09
aggregated_scATAC_peak_21633	chr13	55848555	55849341	upstream	12756	1	ENSMUSG00000021506	Pitx1	protein_coding	3.66849e-09
aggregated_scATAC_peak_21651	chr13	56039622	56040379	upstream	9766	1	ENSMUSG00000114229	AC164426.1	processed_pseudogene	3.84804e-07
aggregated_scATAC_peak_21654	chr13	56063174	56063637	upstream	33172	1	ENSMUSG00000114229	AC164426.1	processed_pseudogene	6.11504e-09
aggregated_scATAC_peak_21717	chr13	56747125	56747989	downstream	6270	1	ENSMUSG00000110086	Gm45623	protein_coding	1.0418e-07
aggregated_scATAC_peak_21740	chr13	57381889	57382375	NA	NA	0,1	NA	NA	NA	1.24343e-06
aggregated_scATAC_peak_21756	chr13	57880998	57881327	PeakInsideFeature	27170	1	ENSMUSG00000056222	Spock1	protein_coding	1.12684e-05
aggregated_scATAC_peak_21764	chr13	57995907	57996972	downstream	26760	1	ENSMUSG00000077962	Mir874	miRNA	4.15982e-05
aggregated_scATAC_peak_21765	chr13	58002730	58003506	downstream	20082	1	ENSMUSG00000077962	Mir874	miRNA	9.96474e-07
aggregated_scATAC_peak_21771	chr13	58057973	58058935	upstream	35254	1	ENSMUSG00000077962	Mir874	miRNA	5.02558e-07
aggregated_scATAC_peak_21852	chr13	59354129	59354449	upstream	24046	1	ENSMUSG00000114240	AC165260.2	lincRNA	4.85631e-05
aggregated_scATAC_peak_21855	chr13	59412807	59413083	upstream	3644	0	ENSMUSG00000114200	AC155298.1	lincRNA	9.95759e-09
aggregated_scATAC_peak_21861	chr13	59549095	59549953	upstream	8042	1	ENSMUSG00000114526	AC135469.1	TEC	5.91753e-05
aggregated_scATAC_peak_21887	chr13	59892388	59892774	downstream	18939	1	ENSMUSG00000114669	AC125350.4	lincRNA	7.20088e-06
aggregated_scATAC_peak_21891	chr13	59966649	59967275	downstream	47524	1	ENSMUSG00000114308	AC125350.1	processed_pseudogene	3.42547e-10
aggregated_scATAC_peak_21897	chr13	60057650	60057891	upstream	145	0	ENSMUSG00000114795	AC122346.3	lincRNA	4.8072e-05
aggregated_scATAC_peak_21925	chr13	60497474	60498310	upstream	9084	1	ENSMUSG00000114452	AC123619.1	lincRNA	5.57167e-06
aggregated_scATAC_peak_22138	chr13	69196473	69196872	NA	NA	0,1	NA	NA	NA	1.03661e-07
aggregated_scATAC_peak_22159	chr13	69576083	69576362	upstream	32199	1	ENSMUSG00000051805	A530095I07Rik	antisense_RNA	5.0715e-06
aggregated_scATAC_peak_22167	chr13	69700851	69701188	overlapEnd	3209	0	ENSMUSG00000113324	AC122371.1	lincRNA	7.68206e-06
aggregated_scATAC_peak_22221	chr13	71270316	71270772	NA	NA	0,1	NA	NA	NA	3.84239e-06
aggregated_scATAC_peak_22224	chr13	71388887	71389297	NA	NA	0,1	NA	NA	NA	5.7037e-05
aggregated_scATAC_peak_22244	chr13	72077516	72077724	NA	NA	0,1	NA	NA	NA	4.139e-12
aggregated_scATAC_peak_22250	chr13	72209832	72210763	NA	NA	0,1	NA	NA	NA	1.76686e-07
aggregated_scATAC_peak_22264	chr13	72593136	72594115	downstream	34938	1	ENSMUSG00000093587	Gm20554	lincRNA	5.34763e-05
aggregated_scATAC_peak_22276	chr13	72710941	72711644	downstream	8443	1	ENSMUSG00000113697	CT868720.1	TEC	6.47012e-05
aggregated_scATAC_peak_22303	chr13	73279222	73279625	downstream	6194	1	ENSMUSG00000113485	AC154266.1	TEC	1.87585e-08
aggregated_scATAC_peak_22304	chr13	73290154	73290859	downstream	17276	1	ENSMUSG00000113485	AC154266.1	TEC	2.71785e-08
aggregated_scATAC_peak_22408	chr13	76364990	76365345	upstream	19367	1	ENSMUSG00000021596	Mctp1	protein_coding	1.05373e-08
aggregated_scATAC_peak_22414	chr13	77170578	77170940	downstream	1381	0	ENSMUSG00000114256	AC122418.1	processed_pseudogene	9.88101e-06
aggregated_scATAC_peak_22415	chr13	77171087	77171636	downstream	1984	0	ENSMUSG00000114256	AC122418.1	processed_pseudogene	2.47215e-07
aggregated_scATAC_peak_22492	chr13	83952457	83953158	downstream	35183	1	ENSMUSG00000114379	CT030135.1	lincRNA	8.93436e-06
aggregated_scATAC_peak_22505	chr13	86111174	86112096	NA	NA	0,1	NA	NA	NA	5.5922e-09
aggregated_scATAC_peak_22522	chr13	89731750	89732615	upstream	7278	1	ENSMUSG00000089940	Gm4117	antisense_RNA	8.32756e-06
aggregated_scATAC_peak_22705	chr13	95113682	95114243	NA	NA	0,1	NA	NA	NA	2.93346e-06
aggregated_scATAC_peak_22714	chr13	95260445	95260752	upstream	10262	1	ENSMUSG00000021684	Pde8b	protein_coding	5.56184e-05
aggregated_scATAC_peak_22784	chr13	96570642	96571335	upstream	5642	1	ENSMUSG00000113379	Gm46436	TEC	2.65746e-05
aggregated_scATAC_peak_22816	chr13	97299966	97300716	downstream	17158	1	ENSMUSG00000097932	C430039J16Rik	lincRNA	6.42904e-05
aggregated_scATAC_peak_22824	chr13	97363793	97364188	upstream	12244	1	ENSMUSG00000114425	CT030035.1	lincRNA	9.18176e-06
aggregated_scATAC_peak_22869	chr13	98162226	98162552	PeakInsideFeature	44050	1	ENSMUSG00000021662	Arhgef28	protein_coding	1.83633e-07
aggregated_scATAC_peak_22934	chr13	98946015	98946539	upstream	361	0	ENSMUSG00000114569	AC154849.3	lincRNA	8.35272e-05
aggregated_scATAC_peak_22970	chr13	99639814	99640564	upstream	1785	0	ENSMUSG00000103545	1700012J22Rik	TEC	1.2748e-08
aggregated_scATAC_peak_22995	chr13	100526393	100527094	PeakInsideFeature	25974	1	ENSMUSG00000021638	Ocln	protein_coding	2.79697e-06
aggregated_scATAC_peak_23109	chr13	104172304	104173064	PeakInsideFeature	5785	1	ENSMUSG00000021711	Trappc13	protein_coding	4.05953e-07
aggregated_scATAC_peak_23167	chr13	107456541	107457054	upstream	13024	1	ENSMUSG00000114780	CT009733.2	lincRNA	6.76733e-07
aggregated_scATAC_peak_23199	chr13	107961964	107962444	upstream	34081	1	ENSMUSG00000114627	CT025566.1	lincRNA	7.63082e-06
aggregated_scATAC_peak_23251	chr13	109722712	109723208	NA	NA	0,1	NA	NA	NA	9.21551e-06
aggregated_scATAC_peak_23286	chr13	110764810	110765340	NA	NA	0,1	NA	NA	NA	3.38836e-05
aggregated_scATAC_peak_23329	chr13	111967468	111968144	upstream	23660	1	ENSMUSG00000086402	Gm15322	lincRNA	7.76973e-05
aggregated_scATAC_peak_23443	chr13	114680121	114680780	NA	NA	0,1	NA	NA	NA	2.85457e-06
aggregated_scATAC_peak_23457	chr13	115109680	115110098	upstream	6238	1	ENSMUSG00000096021	Gm25985	snRNA	9.33339e-07
aggregated_scATAC_peak_23462	chr13	115346147	115347112	NA	NA	0,1	NA	NA	NA	4.53752e-07
aggregated_scATAC_peak_23471	chr13	115799452	115799688	downstream	28634	1	ENSMUSG00000114324	AC166830.1	processed_pseudogene	2.15636e-05
aggregated_scATAC_peak_23846	chr14	16587729	16588580	downstream	12553	1	ENSMUSG00000114463	AC154471.1	antisense_RNA	1.15795e-07
aggregated_scATAC_peak_23848	chr14	16604331	16605120	downstream	29125	1	ENSMUSG00000114463	AC154471.1	antisense_RNA	1.49944e-05
aggregated_scATAC_peak_23859	chr14	17089056	17089598	upstream	16234	1	ENSMUSG00000114296	AC138667.1	processed_pseudogene	7.74618e-06
aggregated_scATAC_peak_23949	chr14	20195124	20195324	downstream	4730	1	ENSMUSG00000114523	AC126275.2	processed_pseudogene	5.34705e-05
aggregated_scATAC_peak_23950	chr14	20208064	20208892	upstream	7024	1	ENSMUSG00000114439	AC159106.2	lincRNA	4.81569e-06
aggregated_scATAC_peak_23951	chr14	20220975	20221502	overlapEnd	5736	1	ENSMUSG00000114439	AC159106.2	lincRNA	2.89823e-06
aggregated_scATAC_peak_23957	chr14	20268903	20269843	overlapStart	174	0	ENSMUSG00000023387	Kcnk16	protein_coding	4.58844e-05
aggregated_scATAC_peak_24003	chr14	21096694	21096978	PeakInsideFeature	44262	1	ENSMUSG00000039197	Adk	protein_coding	4.66709e-05
aggregated_scATAC_peak_24017	chr14	21586618	21586998	NA	NA	0,1	NA	NA	NA	4.17589e-06
aggregated_scATAC_peak_24051	chr14	22105810	22106308	NA	NA	0,1	NA	NA	NA	1.26955e-06
aggregated_scATAC_peak_24067	chr14	22339533	22339749	NA	NA	0,1	NA	NA	NA	1.33252e-05
aggregated_scATAC_peak_24100	chr14	23244465	23244870	NA	NA	0,1	NA	NA	NA	5.06076e-06
aggregated_scATAC_peak_24200	chr14	25207801	25208889	NA	NA	0,1	NA	NA	NA	8.92779e-06
aggregated_scATAC_peak_24223	chr14	25451102	25452322	upstream	7473	1	ENSMUSG00000007817	Zmiz1	protein_coding	4.60552e-09
aggregated_scATAC_peak_24271	chr14	25826267	25826481	downstream	1731	0	ENSMUSG00000077081	Gm23701	miRNA	1.71748e-09
aggregated_scATAC_peak_24377	chr14	28501216	28501676	upstream	3304	0	ENSMUSG00000021994	Wnt5a	protein_coding	2.63503e-09
aggregated_scATAC_peak_24407	chr14	29498678	29499140	NA	NA	0,1	NA	NA	NA	4.3994e-11
aggregated_scATAC_peak_24415	chr14	29903594	29903918	PeakInsideFeature	806	0	ENSMUSG00000114606	AC154576.1	transcribed_processed_pseudogene	1.86774e-06
aggregated_scATAC_peak_24518	chr14	31565484	31566148	PeakInsideFeature	25527	1	ENSMUSG00000057606	Colq	protein_coding	1.6142e-07
aggregated_scATAC_peak_24551	chr14	32060275	32061155	upstream	24377	1	ENSMUSG00000115628	AC154846.2	processed_pseudogene	3.44463e-05
aggregated_scATAC_peak_24583	chr14	32555191	32555465	upstream	40005	1	ENSMUSG00000115281	AC154412.1	TEC	6.12939e-07
aggregated_scATAC_peak_24595	chr14	32776106	32776343	upstream	9739	1	ENSMUSG00000041707	1810011H11Rik	protein_coding	5.84392e-09
aggregated_scATAC_peak_24603	chr14	32986604	32987065	upstream	4548	0	ENSMUSG00000041673	Lrrc18	protein_coding	3.60525e-07
aggregated_scATAC_peak_24727	chr14	35142885	35143270	NA	NA	0,1	NA	NA	NA	4.94163e-06
aggregated_scATAC_peak_24729	chr14	35154365	35154755	NA	NA	0,1	NA	NA	NA	4.67336e-07
aggregated_scATAC_peak_24745	chr14	37109963	37110805	PeakInsideFeature	3638	0	ENSMUSG00000096001	2610528A11Rik	protein_coding	1.06563e-07
aggregated_scATAC_peak_24758	chr14	40830077	40830409	NA	NA	0,1	NA	NA	NA	6.73854e-07
aggregated_scATAC_peak_24956	chr14	47786264	47786464	downstream	15101	1	ENSMUSG00000115046	CT009515.1	lincRNA	2.27905e-06
aggregated_scATAC_peak_24963	chr14	47877276	47877484	upstream	21471	1	ENSMUSG00000115609	CT030238.4	lincRNA	3.72237e-11
aggregated_scATAC_peak_24990	chr14	48536899	48537206	upstream	939	0	ENSMUSG00000115725	AC164437.4	lincRNA	6.76674e-07
aggregated_scATAC_peak_25023	chr14	49245280	49245817	overlapStart	74	0	ENSMUSG00000021850	1700011H14Rik	protein_coding	4.61316e-07
aggregated_scATAC_peak_25059	chr14	51096099	51096480	PeakInsideFeature	5140	1	ENSMUSG00000072115	Ang	protein_coding	2.08033e-07
aggregated_scATAC_peak_25078	chr14	51793960	51794539	upstream	497	0	ENSMUSG00000092107	Ear-ps4	unprocessed_pseudogene	1.34673e-07
aggregated_scATAC_peak_25087	chr14	51898459	51898680	downstream	5681	1	ENSMUSG00000072572	Slc39a2	protein_coding	2.33346e-06
aggregated_scATAC_peak_25132	chr14	54095856	54096309	upstream	17386	1	ENSMUSG00000096749	Trdd1	TR_D_gene	2.85917e-05
aggregated_scATAC_peak_25346	chr14	56922867	56923205	PeakInsideFeature	36383	1	ENSMUSG00000021945	Zmym2	protein_coding	7.44875e-07
aggregated_scATAC_peak_25359	chr14	57134913	57135121	upstream	1406	0	ENSMUSG00000040055	Gjb6	protein_coding	2.2913e-08
aggregated_scATAC_peak_25424	chr14	58168770	58169371	NA	NA	0,1	NA	NA	NA	2.1932e-08
aggregated_scATAC_peak_25432	chr14	58421909	58422341	NA	NA	0,1	NA	NA	NA	1.75106e-05
aggregated_scATAC_peak_25489	chr14	60170932	60171132	downstream	16881	1	ENSMUSG00000072068	Gm16261	processed_pseudogene	1.45055e-06
aggregated_scATAC_peak_25490	chr14	60171324	60171551	downstream	17287	1	ENSMUSG00000072068	Gm16261	processed_pseudogene	1.9156e-05
aggregated_scATAC_peak_25494	chr14	60202327	60202582	upstream	5275	1	ENSMUSG00000021983	Atp8a2	protein_coding	3.43312e-06
aggregated_scATAC_peak_25495	chr14	60212246	60212575	PeakInsideFeature	4009	0	ENSMUSG00000114584	AC131687.1	TEC	4.71356e-05
aggregated_scATAC_peak_25609	chr14	62825337	62825844	downstream	6747	1	ENSMUSG00000114440	AC154861.1	processed_pseudogene	1.89254e-06
aggregated_scATAC_peak_25646	chr14	63303239	63303550	upstream	14351	1	ENSMUSG00000114898	AC090962.2	lincRNA	2.85788e-09
aggregated_scATAC_peak_25670	chr14	63508418	63509895	overlapStart	64	0	ENSMUSG00000021953	Tdh	protein_coding	1.1724e-07
aggregated_scATAC_peak_25732	chr14	64871965	64872733	upstream	33090	1	ENSMUSG00000102764	Gm37183	TEC	3.92127e-05
aggregated_scATAC_peak_25763	chr14	65299212	65299706	upstream	26872	1	ENSMUSG00000114209	AC152169.1	lincRNA	1.02851e-06
aggregated_scATAC_peak_25782	chr14	65431708	65432177	upstream	6470	1	ENSMUSG00000045731	Pnoc	protein_coding	6.76791e-05
aggregated_scATAC_peak_25845	chr14	66495803	66496060	NA	NA	0,1	NA	NA	NA	6.38213e-12
aggregated_scATAC_peak_25879	chr14	67176394	67176977	PeakInsideFeature	7098	1	ENSMUSG00000114697	AC166061.1	lincRNA	8.75862e-06
aggregated_scATAC_peak_26106	chr14	73107073	73107415	upstream	15793	1	ENSMUSG00000022106	Rcbtb2	protein_coding	4.91404e-05
aggregated_scATAC_peak_26261	chr14	76817149	76817777	upstream	15358	1	ENSMUSG00000115353	AC134577.1	lincRNA	4.94403e-12
aggregated_scATAC_peak_26352	chr14	79527681	79528168	downstream	34368	1	ENSMUSG00000093684	Gm27857	miRNA	1.01752e-05
aggregated_scATAC_peak_26415	chr14	97543151	97543429	NA	NA	0,1	NA	NA	NA	3.60195e-05
aggregated_scATAC_peak_26441	chr14	99363849	99364673	downstream	1756	0	ENSMUSG00000115746	AC165154.2	processed_pseudogene	2.94394e-05
aggregated_scATAC_peak_26448	chr14	99646280	99646489	upstream	15718	1	ENSMUSG00000115366	AC154838.1	processed_pseudogene	7.59848e-07
aggregated_scATAC_peak_26479	chr14	101469604	101469984	NA	NA	0,1	NA	NA	NA	3.28595e-11
aggregated_scATAC_peak_26491	chr14	101835934	101836714	NA	NA	0,1	NA	NA	NA	5.36274e-05
aggregated_scATAC_peak_26492	chr14	101840138	101840744	NA	NA	0,1	NA	NA	NA	4.16e-08
aggregated_scATAC_peak_26577	chr14	105427461	105427974	overlapStart	159	0	ENSMUSG00000115548	AC138716.2	lincRNA	1.03932e-05
aggregated_scATAC_peak_26594	chr14	105732110	105732958	NA	NA	0,1	NA	NA	NA	1.38006e-07
aggregated_scATAC_peak_26638	chr14	115236264	115237209	NA	NA	0,1	NA	NA	NA	1.68747e-07
aggregated_scATAC_peak_26648	chr14	116683613	116684125	NA	NA	0,1	NA	NA	NA	2.18069e-08
aggregated_scATAC_peak_26691	chr14	118282944	118283335	downstream	16180	1	ENSMUSG00000092109	Gm9376	protein_coding	1.59767e-08
aggregated_scATAC_peak_26781	chr14	120337676	120338375	NA	NA	0,1	NA	NA	NA	1.20559e-09
aggregated_scATAC_peak_26865	chr14	121824634	121825184	upstream	6105	1	ENSMUSG00000115443	AC165155.1	processed_pseudogene	2.92119e-05
aggregated_scATAC_peak_27006	chr15	7014673	7015647	downstream	19123	1	ENSMUSG00000104334	Gm38282	TEC	9.68465e-10
aggregated_scATAC_peak_27007	chr15	7021198	7021405	downstream	25265	1	ENSMUSG00000104334	Gm38282	TEC	4.41427e-08
aggregated_scATAC_peak_27034	chr15	7555869	7556234	downstream	20190	1	ENSMUSG00000115033	AC112935.1	processed_pseudogene	3.49363e-05
aggregated_scATAC_peak_27067	chr15	8532433	8532757	upstream	3004	0	ENSMUSG00000115577	AC132833.2	processed_pseudogene	2.80184e-05
aggregated_scATAC_peak_27096	chr15	9106387	9106736	upstream	33988	1	ENSMUSG00000039704	Lmbrd2	protein_coding	1.13505e-09
aggregated_scATAC_peak_27161	chr15	11433326	11433735	upstream	33865	1	ENSMUSG00000022241	Tars	protein_coding	7.45032e-07
aggregated_scATAC_peak_27322	chr15	26501367	26501572	NA	NA	0,1	NA	NA	NA	8.42299e-05
aggregated_scATAC_peak_27334	chr15	27259620	27260191	NA	NA	0,1	NA	NA	NA	2.41642e-08
aggregated_scATAC_peak_27448	chr15	31343535	31344287	PeakInsideFeature	23815	1	ENSMUSG00000022237	Ankrd33b	protein_coding	1.09105e-07
aggregated_scATAC_peak_27474	chr15	32190470	32190814	downstream	13353	1	ENSMUSG00000045267	Tas2r119	protein_coding	2.93944e-08
aggregated_scATAC_peak_27508	chr15	34285086	34285698	downstream	3478	1	ENSMUSG00000084738	Gm25809	snoRNA	6.435e-07
aggregated_scATAC_peak_27525	chr15	34982464	34982676	NA	NA	0,1	NA	NA	NA	6.13498e-06
aggregated_scATAC_peak_27527	chr15	35011202	35012081	NA	NA	0,1	NA	NA	NA	2.00404e-10
aggregated_scATAC_peak_27532	chr15	35265971	35266642	upstream	29792	1	ENSMUSG00000022330	Osr2	protein_coding	2.29737e-05
aggregated_scATAC_peak_27660	chr15	37323667	37324156	downstream	8897	1	ENSMUSG00000089811	Gm16138	processed_pseudogene	1.8914e-05
aggregated_scATAC_peak_27725	chr15	38640793	38641001	overlapEnd	18942	1	ENSMUSG00000115547	AC133654.1	lincRNA	8.28205e-05
aggregated_scATAC_peak_27752	chr15	39473443	39473779	NA	NA	0,1	NA	NA	NA	2.30472e-05
aggregated_scATAC_peak_27789	chr15	41846083	41846680	downstream	23338	1	ENSMUSG00000042895	Abra	protein_coding	4.06042e-05
aggregated_scATAC_peak_27885	chr15	52551762	52552132	NA	NA	0,1	NA	NA	NA	1.53994e-05
aggregated_scATAC_peak_27921	chr15	54571152	54571959	overlapStart	364	0	ENSMUSG00000024479	Mal2	protein_coding	9.94063e-05
aggregated_scATAC_peak_27926	chr15	54810636	54811101	upstream	45355	1	ENSMUSG00000098237	Gm7577	processed_pseudogene	5.95616e-05
aggregated_scATAC_peak_27931	chr15	55043568	55043919	PeakInsideFeature	28408	1	ENSMUSG00000037343	Taf2	protein_coding	1.45518e-05
aggregated_scATAC_peak_27947	chr15	55265304	55266388	upstream	3243	0	ENSMUSG00000095792	Gm26296	snRNA	5.16342e-07
aggregated_scATAC_peak_27954	chr15	55426642	55426936	downstream	12231	1	ENSMUSG00000101568	1700040F17Rik	antisense_RNA	2.16619e-05
aggregated_scATAC_peak_27955	chr15	55431393	55431864	downstream	7392	1	ENSMUSG00000101568	1700040F17Rik	antisense_RNA	9.77051e-05
aggregated_scATAC_peak_28083	chr15	59040386	59040636	PeakInsideFeature	41494	1	ENSMUSG00000022353	Mtss1	protein_coding	8.00344e-06
aggregated_scATAC_peak_28117	chr15	59480623	59480859	NA	NA	0,1	NA	NA	NA	3.06335e-05
aggregated_scATAC_peak_28284	chr15	66399887	66400469	upstream	41694	1	ENSMUSG00000115351	AC112972.1	processed_pseudogene	6.4333e-10
aggregated_scATAC_peak_28384	chr15	72990537	72991008	NA	NA	0,1	NA	NA	NA	1.89935e-06
aggregated_scATAC_peak_28425	chr15	73638574	73638954	PeakInsideFeature	6998	1	ENSMUSG00000079020	Slc45a4	protein_coding	2.86836e-05
aggregated_scATAC_peak_28503	chr15	74708303	74708581	upstream	719	0	ENSMUSG00000044276	4933427E11Rik	antisense_RNA	8.37969e-06
aggregated_scATAC_peak_28520	chr15	74973436	74973721	downstream	9852	1	ENSMUSG00000022586	Ly6i	protein_coding	1.12889e-05
aggregated_scATAC_peak_28533	chr15	75401564	75401950	upstream	24488	1	ENSMUSG00000102028	Gm3142	unprocessed_pseudogene	5.58476e-07
aggregated_scATAC_peak_28534	chr15	75457409	75457862	downstream	8179	1	ENSMUSG00000093626	Ly6l	protein_coding	2.33603e-07
aggregated_scATAC_peak_28542	chr15	75603374	75603782	downstream	6950	1	ENSMUSG00000022579	Gpihbp1	protein_coding	4.35048e-06
aggregated_scATAC_peak_28543	chr15	75603926	75604271	downstream	7470	1	ENSMUSG00000022579	Gpihbp1	protein_coding	3.79441e-05
aggregated_scATAC_peak_28577	chr15	75975723	75976325	downstream	6431	1	ENSMUSG00000098176	Ccdc166	protein_coding	1.95461e-08
aggregated_scATAC_peak_28714	chr15	77273918	77274298	upstream	31557	1	ENSMUSG00000089242	Gm24056	snRNA	2.37229e-05
aggregated_scATAC_peak_28750	chr15	77821946	77822536	downstream	18515	1	ENSMUSG00000084497	Gm22107	snRNA	1.93658e-10
aggregated_scATAC_peak_28764	chr15	77907635	77908160	downstream	21108	1	ENSMUSG00000005354	Txn2	protein_coding	1.20762e-08
aggregated_scATAC_peak_28792	chr15	78343705	78344066	upstream	4713	0	ENSMUSG00000099059	Mir7676-2	miRNA	7.74102e-07
aggregated_scATAC_peak_28794	chr15	78366003	78366316	upstream	3088	0	ENSMUSG00000070235	Gm26329	misc_RNA	8.42838e-05
aggregated_scATAC_peak_28849	chr15	78844776	78845186	PeakInsideFeature	2334	1	ENSMUSG00000049521	Cdc42ep1	protein_coding	1.41846e-07
aggregated_scATAC_peak_28887	chr15	79051305	79051891	downstream	9713	1	ENSMUSG00000114755	Galr3	protein_coding	1.324e-06
aggregated_scATAC_peak_28913	chr15	79285382	79285876	overlapStart	92	0	ENSMUSG00000018126	Baiap2l2	protein_coding	2.68286e-05
aggregated_scATAC_peak_29004	chr15	80191622	80192065	PeakInsideFeature	18123	1	ENSMUSG00000042428	Mgat3	protein_coding	8.75469e-06
aggregated_scATAC_peak_29087	chr15	81259021	81259324	downstream	23673	1	ENSMUSG00000050164	Mchr1	protein_coding	4.65286e-06
aggregated_scATAC_peak_29088	chr15	81260172	81260722	downstream	24948	1	ENSMUSG00000050164	Mchr1	protein_coding	2.69314e-09
aggregated_scATAC_peak_29094	chr15	81356226	81356426	PeakInsideFeature	4439	0	ENSMUSG00000022404	Slc25a17	protein_coding	3.52495e-07
aggregated_scATAC_peak_29152	chr15	82118720	82119447	upstream	8838	1	ENSMUSG00000068114	Ccdc134	protein_coding	1.96811e-06
aggregated_scATAC_peak_29162	chr15	82184931	82185366	upstream	12974	1	ENSMUSG00000065465	Mir33	miRNA	4.1171e-06
aggregated_scATAC_peak_29189	chr15	82720903	82721324	upstream	30615	1	ENSMUSG00000075517	Cyp2d37-ps	protein_coding	5.63987e-05
aggregated_scATAC_peak_29385	chr15	84841968	84843034	PeakInsideFeature	13548	1	ENSMUSG00000016624	Phf21b	protein_coding	6.31911e-08
aggregated_scATAC_peak_29400	chr15	85011913	85012936	upstream	4717	0	ENSMUSG00000022435	Upk3a	protein_coding	2.29824e-07
aggregated_scATAC_peak_29411	chr15	85206704	85207230	PeakInsideFeature	1018	0	ENSMUSG00000006369	Fbln1	protein_coding	7.53257e-05
aggregated_scATAC_peak_29420	chr15	85298181	85298829	upstream	37876	1	ENSMUSG00000016541	Atxn10	protein_coding	6.75926e-05
aggregated_scATAC_peak_29538	chr15	86429865	86430317	NA	NA	0,1	NA	NA	NA	6.26079e-08
aggregated_scATAC_peak_29561	chr15	86944111	86945026	NA	NA	0,1	NA	NA	NA	2.22352e-11
aggregated_scATAC_peak_29756	chr15	93682189	93682710	NA	NA	0,1	NA	NA	NA	1.22956e-05
aggregated_scATAC_peak_29758	chr15	93710683	93711590	NA	NA	0,1	NA	NA	NA	4.49541e-11
aggregated_scATAC_peak_29765	chr15	93807624	93808470	NA	NA	0,1	NA	NA	NA	3.66488e-09
aggregated_scATAC_peak_29826	chr15	95904314	95904627	upstream	24653	1	ENSMUSG00000092978	Gm25070	miRNA	1.02006e-05
aggregated_scATAC_peak_30176	chr15	100107225	100107628	NA	NA	0,1	NA	NA	NA	1.95017e-05
aggregated_scATAC_peak_30283	chr15	101182631	101183013	PeakInsideFeature	8755	1	ENSMUSG00000000532	Acvr1b	protein_coding	2.68622e-05
aggregated_scATAC_peak_30331	chr15	101491468	101491945	overlapStart	194	0	ENSMUSG00000067613	Krt83	protein_coding	1.14829e-06
aggregated_scATAC_peak_30340	chr15	101622509	101622725	downstream	5571	1	ENSMUSG00000064232	Gm5414	protein_coding	1.06471e-07
aggregated_scATAC_peak_30370	chr15	102016085	102016418	upstream	11910	1	ENSMUSG00000049382	Krt8	protein_coding	8.1988e-06
aggregated_scATAC_peak_30378	chr15	102041877	102042570	downstream	14008	1	ENSMUSG00000023043	Krt18	protein_coding	9.82164e-06
aggregated_scATAC_peak_30401	chr15	102191644	102192146	upstream	2852	0	ENSMUSG00000023044	Csad	protein_coding	2.01275e-06
aggregated_scATAC_peak_30473	chr15	102931803	102932146	upstream	4783	0	ENSMUSG00000050328	Hoxc12	protein_coding	2.30295e-05
aggregated_scATAC_peak_30479	chr15	102959636	102960269	downstream	5525	1	ENSMUSG00000001656	Hoxc11	protein_coding	3.88042e-07
aggregated_scATAC_peak_30486	chr15	102992940	102993207	PeakInsideFeature	2467	1	ENSMUSG00000001657	Hoxc8	protein_coding	5.53025e-05
aggregated_scATAC_peak_30487	chr15	102997946	102998288	overlapStart	140	0	ENSMUSG00000001661	Hoxc6	protein_coding	3.6e-06
aggregated_scATAC_peak_30639	chr16	5109958	5110304	PeakInsideFeature	22350	1	ENSMUSG00000039457	Ppl	protein_coding	1.3814e-06
aggregated_scATAC_peak_30681	chr16	6335294	6335508	NA	NA	0,1	NA	NA	NA	2.54066e-05
aggregated_scATAC_peak_30754	chr16	9588405	9588740	NA	NA	0,1	NA	NA	NA	2.32536e-07
aggregated_scATAC_peak_30770	chr16	10327690	10328523	upstream	14138	1	ENSMUSG00000022505	Emp2	protein_coding	5.25726e-08
aggregated_scATAC_peak_30829	chr16	10972253	10972640	downstream	6722	1	ENSMUSG00000093897	Gm26268	miRNA	1.00268e-10
aggregated_scATAC_peak_30923	chr16	13866182	13866382	PeakInsideFeature	36849	1	ENSMUSG00000022680	Pdxdc1	protein_coding	3.07095e-06
aggregated_scATAC_peak_30928	chr16	13940453	13941141	upstream	19398	1	ENSMUSG00000089818	Gm15950	unprocessed_pseudogene	1.13427e-07
aggregated_scATAC_peak_31083	chr16	18185766	18186564	upstream	20995	1	ENSMUSG00000099293	Mir6366	miRNA	7.4284e-14
aggregated_scATAC_peak_31289	chr16	22390318	22390853	PeakInsideFeature	49133	1	ENSMUSG00000013089	Etv5	protein_coding	1.56922e-07
aggregated_scATAC_peak_31300	chr16	22501910	22502224	upstream	9413	1	ENSMUSG00000089874	9230117E06Rik	antisense_RNA	2.2024e-09
aggregated_scATAC_peak_31314	chr16	22622199	22622694	downstream	17120	1	ENSMUSG00000098448	Mir6362	miRNA	4.25061e-06
aggregated_scATAC_peak_31342	chr16	23199105	23199418	upstream	1141	0	ENSMUSG00000081988	Gm15746	processed_pseudogene	2.5819e-08
aggregated_scATAC_peak_31365	chr16	23437381	23438111	downstream	8613	1	ENSMUSG00000033383	Rtp1	protein_coding	1.18098e-06
aggregated_scATAC_peak_31389	chr16	24056667	24057504	NA	NA	0,1	NA	NA	NA	3.76069e-05
aggregated_scATAC_peak_31399	chr16	24398439	24399163	upstream	5213	1	ENSMUSG00000097867	Lppos	lincRNA	2.62543e-07
aggregated_scATAC_peak_31441	chr16	25817552	25818552	NA	NA	0,1	NA	NA	NA	1.61654e-06
aggregated_scATAC_peak_31520	chr16	29787933	29788673	upstream	22755	1	ENSMUSG00000097307	Gm26834	lincRNA	2.46848e-07
aggregated_scATAC_peak_31536	chr16	29888754	29889008	NA	NA	0,1	NA	NA	NA	4.28181e-06
aggregated_scATAC_peak_31538	chr16	29896430	29896798	downstream	49903	1	ENSMUSG00000097313	Gm26569	lincRNA	6.28296e-09
aggregated_scATAC_peak_31551	chr16	30053063	30053690	upstream	11008	1	ENSMUSG00000022528	Hes1	protein_coding	4.58268e-06
aggregated_scATAC_peak_31552	chr16	30055442	30055707	upstream	8810	1	ENSMUSG00000022528	Hes1	protein_coding	2.09099e-10
aggregated_scATAC_peak_31673	chr16	31364553	31364877	downstream	14418	1	ENSMUSG00000101234	1700007E05Rik	transcribed_processed_pseudogene	1.16941e-06
aggregated_scATAC_peak_31717	chr16	32008147	32008867	upstream	5220	1	ENSMUSG00000022772	Senp5	protein_coding	1.38738e-06
aggregated_scATAC_peak_31718	chr16	32009941	32010603	upstream	6985	1	ENSMUSG00000022772	Senp5	protein_coding	2.40741e-05
aggregated_scATAC_peak_31719	chr16	32017528	32017780	upstream	14367	1	ENSMUSG00000022772	Senp5	protein_coding	4.53932e-07
aggregated_scATAC_peak_31879	chr16	34069382	34070172	NA	NA	0,1	NA	NA	NA	4.72309e-06
aggregated_scATAC_peak_31902	chr16	34369785	34370368	NA	NA	0,1	NA	NA	NA	3.08099e-05
aggregated_scATAC_peak_31912	chr16	34452781	34453029	NA	NA	0,1	NA	NA	NA	4.41416e-06
aggregated_scATAC_peak_31939	chr16	34924909	34925467	downstream	14141	1	ENSMUSG00000100593	1700119H24Rik	antisense_RNA	1.35151e-06
aggregated_scATAC_peak_31948	chr16	34978970	34979182	upstream	39747	1	ENSMUSG00000100593	1700119H24Rik	antisense_RNA	8.90097e-07
aggregated_scATAC_peak_31978	chr16	35406708	35407515	upstream	19027	1	ENSMUSG00000064769	Gm23518	snRNA	6.30944e-06
aggregated_scATAC_peak_32021	chr16	36332638	36333500	PeakInsideFeature	1263	0	ENSMUSG00000079594	BC117090	protein_coding	4.51834e-05
aggregated_scATAC_peak_32053	chr16	37564856	37565221	upstream	15115	1	ENSMUSG00000022821	Hgd	protein_coding	2.24521e-07
aggregated_scATAC_peak_32164	chr16	41685617	41685946	NA	NA	0,1	NA	NA	NA	1.75542e-06
aggregated_scATAC_peak_32184	chr16	43069737	43070285	NA	NA	0,1	NA	NA	NA	7.00082e-06
aggregated_scATAC_peak_32278	chr16	45830504	45831737	NA	NA	0,1	NA	NA	NA	2.38036e-05
aggregated_scATAC_peak_32287	chr16	45953204	45953761	overlapStart	116	0	ENSMUSG00000033149	Phldb2	protein_coding	3.15249e-06
aggregated_scATAC_peak_32288	chr16	45962345	45962713	upstream	8931	1	ENSMUSG00000033149	Phldb2	protein_coding	2.20242e-06
aggregated_scATAC_peak_32301	chr16	46502456	46502708	upstream	4057	0	ENSMUSG00000022656	Nectin3	protein_coding	8.0417e-06
aggregated_scATAC_peak_32306	chr16	46776433	46776808	NA	NA	0,1	NA	NA	NA	3.5363e-05
aggregated_scATAC_peak_32396	chr16	54229855	54230458	NA	NA	0,1	NA	NA	NA	1.11858e-06
aggregated_scATAC_peak_32397	chr16	54456901	54457187	NA	NA	0,1	NA	NA	NA	4.31156e-07
aggregated_scATAC_peak_32453	chr16	57506145	57506763	NA	NA	0,1	NA	NA	NA	1.18818e-06
aggregated_scATAC_peak_32459	chr16	57685842	57686877	NA	NA	0,1	NA	NA	NA	1.39689e-06
aggregated_scATAC_peak_32497	chr16	62325572	62325828	NA	NA	0,1	NA	NA	NA	3.90228e-06
aggregated_scATAC_peak_32547	chr16	72677356	72677875	PeakInsideFeature	14467	1	ENSMUSG00000022883	Robo1	protein_coding	6.42275e-06
aggregated_scATAC_peak_32550	chr16	72830488	72830957	NA	NA	0,1	NA	NA	NA	1.37354e-06
aggregated_scATAC_peak_32564	chr16	73870677	73870972	NA	NA	0,1	NA	NA	NA	1.53008e-09
aggregated_scATAC_peak_32571	chr16	74560396	74561265	upstream	46927	1	ENSMUSG00000088392	Gm26307	snoRNA	6.93615e-07
aggregated_scATAC_peak_32574	chr16	74639856	74640279	downstream	32311	1	ENSMUSG00000088392	Gm26307	snoRNA	3.70981e-07
aggregated_scATAC_peak_32613	chr16	76894818	76895141	NA	NA	0,1	NA	NA	NA	2.70452e-05
aggregated_scATAC_peak_32741	chr16	88412292	88412630	NA	NA	0,1	NA	NA	NA	2.58189e-06
aggregated_scATAC_peak_32745	chr16	88563021	88563804	overlapStart	229	0	ENSMUSG00000050520	Cldn8	protein_coding	1.85785e-06
aggregated_scATAC_peak_32747	chr16	88600478	88600683	downstream	11699	1	ENSMUSG00000050239	Krtap24-1	protein_coding	4.30877e-05
aggregated_scATAC_peak_32813	chr16	90412159	90412746	PeakInsideFeature	26055	1	ENSMUSG00000053414	Hunk	protein_coding	3.47116e-07
aggregated_scATAC_peak_32976	chr16	92493872	92494288	PeakInsideFeature	8344	1	ENSMUSG00000022949	Clic6	protein_coding	2.67219e-07
aggregated_scATAC_peak_33002	chr16	92809163	92809416	PeakInsideFeature	16859	1	ENSMUSG00000022952	Runx1	protein_coding	2.20509e-05
aggregated_scATAC_peak_33007	chr16	92856910	92857194	upstream	30903	1	ENSMUSG00000022952	Runx1	protein_coding	2.27174e-05
aggregated_scATAC_peak_33074	chr16	93912273	93912571	downstream	28521	1	ENSMUSG00000022945	Chaf1b	protein_coding	1.89246e-09
aggregated_scATAC_peak_33186	chr16	95696153	95696479	upstream	5759	1	ENSMUSG00000022895	Ets2	protein_coding	5.23559e-05
aggregated_scATAC_peak_33200	chr16	95855210	95855674	upstream	44956	1	ENSMUSG00000085903	Gm15340	lincRNA	2.49214e-07
aggregated_scATAC_peak_33231	chr16	96280634	96281185	PeakInsideFeature	45109	1	ENSMUSG00000074892	B3galt5	protein_coding	2.44543e-05
aggregated_scATAC_peak_33237	chr16	96361319	96362163	overlapStart	73	0	ENSMUSG00000000159	Igsf5	protein_coding	7.13981e-06
aggregated_scATAC_peak_33239	chr16	96371019	96371481	PeakInsideFeature	9582	1	ENSMUSG00000000159	Igsf5	protein_coding	3.20245e-05
aggregated_scATAC_peak_33299	chr16	97632779	97633389	upstream	21889	1	ENSMUSG00000000385	Tmprss2	protein_coding	6.48566e-05
aggregated_scATAC_peak_33301	chr16	97649477	97650114	upstream	38601	1	ENSMUSG00000000385	Tmprss2	protein_coding	2.37338e-08
aggregated_scATAC_peak_33302	chr16	97658672	97659786	upstream	48034	1	ENSMUSG00000000385	Tmprss2	protein_coding	2.57822e-10
aggregated_scATAC_peak_33427	chr17	5858293	5858563	PeakInsideFeature	17100	1	ENSMUSG00000002365	Snx9	protein_coding	5.44552e-06
aggregated_scATAC_peak_33429	chr17	5868308	5868794	PeakInsideFeature	27223	1	ENSMUSG00000002365	Snx9	protein_coding	7.99764e-07
aggregated_scATAC_peak_33454	chr17	6073328	6073893	PeakInsideFeature	6131	1	ENSMUSG00000015659	Serac1	protein_coding	2.85204e-07
aggregated_scATAC_peak_33489	chr17	6798391	6798777	upstream	15800	1	ENSMUSG00000052397	Ezr	protein_coding	1.84013e-05
aggregated_scATAC_peak_33653	chr17	11867367	11868260	NA	NA	0,1	NA	NA	NA	7.90958e-06
aggregated_scATAC_peak_33669	chr17	12047619	12047938	NA	NA	0,1	NA	NA	NA	9.42266e-05
aggregated_scATAC_peak_33754	chr17	13742272	13742710	downstream	17494	1	ENSMUSG00000086292	Gm16052	antisense_RNA	6.00448e-06
aggregated_scATAC_peak_33771	chr17	14178433	14179006	downstream	25111	1	ENSMUSG00000048826	Dact2	protein_coding	4.29035e-08
aggregated_scATAC_peak_33773	chr17	14192355	14192838	downstream	11235	1	ENSMUSG00000048826	Dact2	protein_coding	2.19926e-06
aggregated_scATAC_peak_33816	chr17	15074659	15075855	overlapEnd	9642	1	ENSMUSG00000100536	Gm28873	lincRNA	3.90466e-08
aggregated_scATAC_peak_33828	chr17	15226561	15227083	downstream	13961	1	ENSMUSG00000097624	Gm5091	lincRNA	3.42948e-06
aggregated_scATAC_peak_33883	chr17	17762698	17763241	upstream	20162	1	ENSMUSG00000084605	Gm23837	misc_RNA	5.6459e-05
aggregated_scATAC_peak_34009	chr17	24393453	24393952	downstream	20840	1	ENSMUSG00000073437	D330041H03Rik	processed_transcript	4.11697e-08
aggregated_scATAC_peak_34079	chr17	25175129	25175981	overlapStart	84	0	ENSMUSG00000114245	AC130711.1	protein_coding	2.45951e-09
aggregated_scATAC_peak_34103	chr17	25448501	25449039	upstream	14987	1	ENSMUSG00000024112	Cacna1h	protein_coding	1.61979e-05
aggregated_scATAC_peak_34159	chr17	25968178	25968549	upstream	15799	1	ENSMUSG00000025727	A930017K11Rik	protein_coding	1.9919e-06
aggregated_scATAC_peak_34261	chr17	27063829	27064562	PeakInsideFeature	6892	1	ENSMUSG00000042644	Itpr3	protein_coding	1.40017e-05
aggregated_scATAC_peak_34338	chr17	27726515	27727029	PeakInsideFeature	2179	0	ENSMUSG00000024215	Spdef	protein_coding	2.57141e-05
aggregated_scATAC_peak_34358	chr17	27965252	27965554	overlapStart	87	0	ENSMUSG00000085846	Gm15597	antisense_RNA	9.2728e-07
aggregated_scATAC_peak_34482	chr17	29072560	29073338	PeakInsideFeature	6012	1	ENSMUSG00000085912	Trp53cor1	lincRNA	1.56501e-05
aggregated_scATAC_peak_34487	chr17	29123553	29124050	PeakInsideFeature	9657	1	ENSMUSG00000084956	Gm16194	lincRNA	4.21299e-05
aggregated_scATAC_peak_34501	chr17	29245746	29246087	upstream	8119	1	ENSMUSG00000024008	Cpne5	protein_coding	3.07166e-05
aggregated_scATAC_peak_34544	chr17	29694642	29694842	PeakInsideFeature	22270	1	ENSMUSG00000024018	Ccdc167	protein_coding	1.78968e-05
aggregated_scATAC_peak_34590	chr17	30063716	30064188	NA	NA	0,1	NA	NA	NA	3.31211e-07
aggregated_scATAC_peak_34620	chr17	30508174	30508563	downstream	23707	1	ENSMUSG00000103207	Gm9874	TEC	2.44701e-07
aggregated_scATAC_peak_34646	chr17	30912777	30913121	PeakInsideFeature	11082	1	ENSMUSG00000024027	Glp1r	protein_coding	2.20197e-06
aggregated_scATAC_peak_34664	chr17	31101396	31101701	downstream	28098	1	ENSMUSG00000024029	Tff3	protein_coding	2.45117e-06
aggregated_scATAC_peak_34672	chr17	31134827	31135443	upstream	5489	1	ENSMUSG00000024029	Tff3	protein_coding	1.04201e-07
aggregated_scATAC_peak_34701	chr17	31379964	31380212	upstream	6146	1	ENSMUSG00000041119	Pde9a	protein_coding	3.09679e-07
aggregated_scATAC_peak_34709	chr17	31432707	31433371	PeakInsideFeature	46805	1	ENSMUSG00000041119	Pde9a	protein_coding	9.88167e-09
aggregated_scATAC_peak_34710	chr17	31434958	31435328	PeakInsideFeature	48909	1	ENSMUSG00000041119	Pde9a	protein_coding	1.80525e-05
aggregated_scATAC_peak_34742	chr17	31778053	31778426	NA	NA	0,1	NA	NA	NA	5.85553e-06
aggregated_scATAC_peak_34768	chr17	31965537	31966331	downstream	15385	1	ENSMUSG00000091548	Gm17572	processed_pseudogene	6.36912e-10
aggregated_scATAC_peak_34811	chr17	32577636	32578144	downstream	41332	1	ENSMUSG00000048440	Cyp4f16	protein_coding	7.6033e-07
aggregated_scATAC_peak_34824	chr17	32877433	32878365	downstream	13691	1	ENSMUSG00000095325	Zfp870	protein_coding	5.77152e-05
aggregated_scATAC_peak_34948	chr17	34621059	34621259	upstream	5188	1	ENSMUSG00000015467	Egfl8	protein_coding	1.79334e-06
aggregated_scATAC_peak_35058	chr17	35649372	35649766	upstream	2259	0	ENSMUSG00000092389	Gm20483	antisense_RNA	2.13946e-05
aggregated_scATAC_peak_35276	chr17	43916513	43916725	downstream	45222	1	ENSMUSG00000088576	Gm24532	misc_RNA	1.42623e-05
aggregated_scATAC_peak_35278	chr17	44078608	44079294	overlapStart	138	0	ENSMUSG00000023960	Enpp5	protein_coding	1.52803e-05
[truncated: 165 more rows]

## Sheet: cluster3
peak_id	peak_chr	peak_start	peak_end	genomic_location	distance	query	gene_id	gene_name	gene_type	scABC_qvalue
[truncated: 624 more rows]

[truncated: 2 more sheets: cluster5, cluster4]
