# Supplementary material for: Single cell RNA-seq and ATAC-seq analysis of cardiac progenitor cell transition states and lineage settlement
Source: Nat Commun. 2018 Nov 19;9:4877. doi: 10.1038/s41467-018-07307-6 (PMC6242939; doi:10.1038/s41467-018-07307-6)
Supplement: Supplementary file 9 — Supplementary Data 5 [file 41467_2018_7307_MOESM9_ESM.xlsx]

## Sheet: Overview
Supplementary Data 5. List of parameters for quality statistics of processed bulk ATAC-seq samples.
Raw and processed read numbers of ATAC-seq
RAW:
Sample Id	Count	Sum	Max	Min	Mean	Median
isl_7_5_rep1_R1	42024176	2894063394	75	8	68	75
isl_7_5_rep2_R1	53523527	1994333867	38	8	37	38
isl_7_5_rep3_R1	29347277	1102835512	38	8	37	38
isl_8_5_rep1_R1	22597633	1202085565	75	8	53	45
isl_8_5_rep2_R1	47887095	3268475234	75	8	68	74
isl_8_5_rep3_R1	39711873	1487593897	38	8	37	38
isl_9_5_rep1_R1	29287931	1302874132	75	8	44	38
isl_9_5_rep2_R1	33194420	1241954885	38	8	37	38
isl_KO_9_5_rep1_R1	23601227	883780346	38	8	37	38
isl_KO_9_5_rep2_R1	19437870	727614729	38	8	37	38
Jia_Isl_nkx_OE_R1	45279202	1684650635	38	8	37	38
neg_7_5_R1	19108594	906631578	75	8	47	38
neg_8_5_R1	43679375	2058670848	75	8	47	38
neg_9_5_R1	30982522	2049169005	75	8	66	74
nkx_7_5_rep1_R1	69430571	4400977556	75	8	63	72
nkx_7_5_rep2_R1	31127353	1164662081	38	8	37	38
nkx_8_5_rep1_R1	26025276	1295406843	75	8	49	38
nkx_8_5_rep2_R1	46681138	1748380696	38	8	37	38
nkx_9_5_rep1_R1	32755865	1891847708	75	8	57	62
nkx_9_5_rep2_R1	36171173	1357983345	38	8	37	38
isl_7_5_rep1_R2	42024176	2896780959	75	8	68	75
isl_7_5_rep2_R2	53523527	1995617439	38	8	37	38
isl_7_5_rep3_R2	29347277	1102985611	38	8	37	38
isl_8_5_rep1_R2	22597633	1203730376	75	8	53	45
isl_8_5_rep2_R2	47887095	3272293802	75	8	68	74
isl_8_5_rep3_R2	39711873	1487934309	38	8	37	38
isl_9_5_rep1_R2	29287931	1304640853	75	8	44	38
isl_9_5_rep2_R2	33194420	1242418676	38	8	37	38
isl_KO_9_5_rep1_R2	23601227	883956378	38	8	37	38
isl_KO_9_5_rep2_R2	19437870	727735639	38	8	37	38
Jia_Isl_nkx_OE_R2	45279202	1685079096	38	8	37	38
neg_7_5_R2	19108594	907881363	75	8	47	38
neg_8_5_R2	43679375	2060491163	75	8	47	38
neg_9_5_R2	30982522	2051618479	75	8	66	74
nkx_7_5_rep1_R2	69430571	4408316687	75	8	63	73
nkx_7_5_rep2_R2	31127353	1164903335	38	8	37	38
nkx_8_5_rep1_R2	26025276	1297189187	75	8	49	38
nkx_8_5_rep2_R2	46681138	1748830430	38	8	37	38
nkx_9_5_rep1_R2	32755865	1894854574	75	8	57	63
nkx_9_5_rep2_R2	36171173	1358201280	38	8	37	38
TRIMMED:
java -jar trimmomatic-0.33.jar PE ... LEADING:3 TRAILING:3 SLIDINGWINDOW:5:15 CROP:500 MINLEN:15
Sample Id	Count	Sum	Max	Min	Mean	Median
isl_7_5_rep1_R1_trim	41597605	2825933977	75	15	67	74
isl_7_5_rep2_R1_trim	52102772	1926975066	38	15	36	38
isl_7_5_rep3_R1_trim	29028022	1086598526	38	15	37	38
isl_8_5_rep1_R1_trim	22268419	1167724285	75	15	52	44
isl_8_5_rep2_R1_trim	47392722	3197321740	75	15	67	74
isl_8_5_rep3_R1_trim	38761174	1443758178	38	15	37	38
isl_9_5_rep1_R1_trim	28840930	1271432958	75	15	44	38
isl_9_5_rep2_R1_trim	32257835	1198018864	38	15	37	38
isl_KO_9_5_rep1_R1_trim	23038533	856630418	38	15	37	38
isl_KO_9_5_rep2_R1_trim	18897966	701429475	38	15	37	38
Jia_Isl_nkx_OE_R1_trim	44824986	1661199978	38	15	37	38
neg_7_5_R1_trim	18826542	881684054	75	15	46	38
neg_8_5_R1_trim	43151113	2010357743	75	15	46	38
neg_9_5_R1_trim	30572600	1983454360	75	15	64	73
nkx_7_5_rep1_R1_trim	68752420	4306346682	75	15	62	71
nkx_7_5_rep2_R1_trim	30202182	1121127334	38	15	37	38
nkx_8_5_rep1_R1_trim	25684779	1261645348	75	15	49	38
nkx_8_5_rep2_R1_trim	45574152	1698564041	38	15	37	38
nkx_9_5_rep1_R1_trim	32320882	1836595452	75	15	56	59
nkx_9_5_rep2_R1_trim	35792417	1338716211	38	15	37	38
isl_7_5_rep1_R2_trim	41597605	2802667904	75	15	67	74
isl_7_5_rep2_R2_trim	52102772	1918691158	38	15	36	38
isl_7_5_rep3_R2_trim	29028022	1080749895	38	15	37	38
isl_8_5_rep1_R2_trim	22268419	1159067635	75	15	52	43
isl_8_5_rep2_R2_trim	47392722	3170503097	75	15	66	74
isl_8_5_rep3_R2_trim	38761174	1433291201	38	15	36	38
isl_9_5_rep1_R2_trim	28840930	1261872042	75	15	43	38
isl_9_5_rep2_R2_trim	32257835	1190054110	38	15	36	38
isl_KO_9_5_rep1_R2_trim	23038533	850651177	38	15	36	38
isl_KO_9_5_rep2_R2_trim	18897966	696722940	38	15	36	38
Jia_Isl_nkx_OE_R2_trim	44824986	1654676118	38	15	36	38
neg_7_5_R2_trim	18826542	874071283	75	15	46	38
neg_8_5_R2_trim	43151113	1995568656	75	15	46	38
neg_9_5_R2_trim	30572600	1968438653	75	15	64	73
nkx_7_5_rep1_R2_trim	68752420	4277639682	75	15	62	70
nkx_7_5_rep2_R2_trim	30202182	1113430072	38	15	36	38
nkx_8_5_rep1_R2_trim	25684779	1252452516	75	15	48	38
nkx_8_5_rep2_R2_trim	45574152	1687101129	38	15	37	38
nkx_9_5_rep1_R2_trim	32320882	1820175390	75	15	56	58
nkx_9_5_rep2_R2_trim	35792417	1331758982	38	15	37	38
STAR:
For paired-end: reads of one fragment are counted as one read (mates are not counted separately)
id	parameters	fragments processed	fragments with exactly 1 alignment	fragments with multiple alignments	fragments with no alignment	total fragments aligned	% total fragments aligned
isl-75_1	--outFilterMismatchNoverLmax 0.2 --outFilterScoreMinOverLread 0 --outFilterMatchNminOverLread 0 --outFilterMatchNmin 20 --alignIntronMin 2 --alignIntronMax 1 --outFilterMultimapNmax 1 --alignMatesGapMax 2000 --alignEndsProtrude 10 ConcordantPair	41597605	35966349	0	5631256	35966349	86
isl-75_2	--outFilterMismatchNoverLmax 0.2 --outFilterScoreMinOverLread 0 --outFilterMatchNminOverLread 0 --outFilterMatchNmin 20 --alignIntronMin 2 --alignIntronMax 1 --outFilterMultimapNmax 1 --alignMatesGapMax 2000 --alignEndsProtrude 10 ConcordantPair	52102772	20706099	0	31396673	20706099	39
isl-75_3	--outFilterMismatchNoverLmax 0.2 --outFilterScoreMinOverLread 0 --outFilterMatchNminOverLread 0 --outFilterMatchNmin 20 --alignIntronMin 2 --alignIntronMax 1 --outFilterMultimapNmax 1 --alignMatesGapMax 2000 --alignEndsProtrude 10 ConcordantPair	29028022	21742471	0	7285551	21742471	74
isl-85_1	--outFilterMismatchNoverLmax 0.2 --outFilterScoreMinOverLread 0 --outFilterMatchNminOverLread 0 --outFilterMatchNmin 20 --alignIntronMin 2 --alignIntronMax 1 --outFilterMultimapNmax 1 --alignMatesGapMax 2000 --alignEndsProtrude 10 ConcordantPair	22268419	18628217	0	3640202	18628217	83
isl-85_2	--outFilterMismatchNoverLmax 0.2 --outFilterScoreMinOverLread 0 --outFilterMatchNminOverLread 0 --outFilterMatchNmin 20 --alignIntronMin 2 --alignIntronMax 1 --outFilterMultimapNmax 1 --alignMatesGapMax 2000 --alignEndsProtrude 10 ConcordantPair	47392722	39019800	0	8372922	39019800	82
isl-85_3	--outFilterMismatchNoverLmax 0.2 --outFilterScoreMinOverLread 0 --outFilterMatchNminOverLread 0 --outFilterMatchNmin 20 --alignIntronMin 2 --alignIntronMax 1 --outFilterMultimapNmax 1 --alignMatesGapMax 2000 --alignEndsProtrude 10 ConcordantPair	38761174	29366698	0	9394476	29366698	75
isl-95_1	--outFilterMismatchNoverLmax 0.2 --outFilterScoreMinOverLread 0 --outFilterMatchNminOverLread 0 --outFilterMatchNmin 20 --alignIntronMin 2 --alignIntronMax 1 --outFilterMultimapNmax 1 --alignMatesGapMax 2000 --alignEndsProtrude 10 ConcordantPair	28840930	22363028	0	6477902	22363028	77
isl-95_2	--outFilterMismatchNoverLmax 0.2 --outFilterScoreMinOverLread 0 --outFilterMatchNminOverLread 0 --outFilterMatchNmin 20 --alignIntronMin 2 --alignIntronMax 1 --outFilterMultimapNmax 1 --alignMatesGapMax 2000 --alignEndsProtrude 10 ConcordantPair	32257835	24206331	0	8051504	24206331	75
islKO_1	--outFilterMismatchNoverLmax 0.2 --outFilterScoreMinOverLread 0 --outFilterMatchNminOverLread 0 --outFilterMatchNmin 20 --alignIntronMin 2 --alignIntronMax 1 --outFilterMultimapNmax 1 --alignMatesGapMax 2000 --alignEndsProtrude 10 ConcordantPair	23038533	19099885	0	3938648	19099885	82
islKO_2	--outFilterMismatchNoverLmax 0.2 --outFilterScoreMinOverLread 0 --outFilterMatchNminOverLread 0 --outFilterMatchNmin 20 --alignIntronMin 2 --alignIntronMax 1 --outFilterMultimapNmax 1 --alignMatesGapMax 2000 --alignEndsProtrude 10 ConcordantPair	18897966	15502053	0	3395913	15502053	82
nkxOE_1	--outFilterMismatchNoverLmax 0.2 --outFilterScoreMinOverLread 0 --outFilterMatchNminOverLread 0 --outFilterMatchNmin 20 --alignIntronMin 2 --alignIntronMax 1 --outFilterMultimapNmax 1 --alignMatesGapMax 2000 --alignEndsProtrude 10 ConcordantPair	44824986	34078450	0	10746536	34078450	76
neg-75_1	--outFilterMismatchNoverLmax 0.2 --outFilterScoreMinOverLread 0 --outFilterMatchNminOverLread 0 --outFilterMatchNmin 20 --alignIntronMin 2 --alignIntronMax 1 --outFilterMultimapNmax 1 --alignMatesGapMax 2000 --alignEndsProtrude 10 ConcordantPair	18826542	15719015	0	3107527	15719015	83
neg-85_1	--outFilterMismatchNoverLmax 0.2 --outFilterScoreMinOverLread 0 --outFilterMatchNminOverLread 0 --outFilterMatchNmin 20 --alignIntronMin 2 --alignIntronMax 1 --outFilterMultimapNmax 1 --alignMatesGapMax 2000 --alignEndsProtrude 10 ConcordantPair	43151113	36981280	0	6169833	36981280	85
neg-95_1	--outFilterMismatchNoverLmax 0.2 --outFilterScoreMinOverLread 0 --outFilterMatchNminOverLread 0 --outFilterMatchNmin 20 --alignIntronMin 2 --alignIntronMax 1 --outFilterMultimapNmax 1 --alignMatesGapMax 2000 --alignEndsProtrude 10 ConcordantPair	30572600	26642640	0	3929960	26642640	87
nkx-75_1	--outFilterMismatchNoverLmax 0.2 --outFilterScoreMinOverLread 0 --outFilterMatchNminOverLread 0 --outFilterMatchNmin 20 --alignIntronMin 2 --alignIntronMax 1 --outFilterMultimapNmax 1 --alignMatesGapMax 2000 --alignEndsProtrude 10 ConcordantPair	68752420	58264523	0	10487897	58264523	84
nkx-75_2	--outFilterMismatchNoverLmax 0.2 --outFilterScoreMinOverLread 0 --outFilterMatchNminOverLread 0 --outFilterMatchNmin 20 --alignIntronMin 2 --alignIntronMax 1 --outFilterMultimapNmax 1 --alignMatesGapMax 2000 --alignEndsProtrude 10 ConcordantPair	30202182	17893768	0	12308414	17893768	59
nkx-85_1	--outFilterMismatchNoverLmax 0.2 --outFilterScoreMinOverLread 0 --outFilterMatchNminOverLread 0 --outFilterMatchNmin 20 --alignIntronMin 2 --alignIntronMax 1 --outFilterMultimapNmax 1 --alignMatesGapMax 2000 --alignEndsProtrude 10 ConcordantPair	25684779	20417274	0	5267505	20417274	79
nkx-85_2	--outFilterMismatchNoverLmax 0.2 --outFilterScoreMinOverLread 0 --outFilterMatchNminOverLread 0 --outFilterMatchNmin 20 --alignIntronMin 2 --alignIntronMax 1 --outFilterMultimapNmax 1 --alignMatesGapMax 2000 --alignEndsProtrude 10 ConcordantPair	45574152	32790580	0	12783572	32790580	71
nkx-95_1	--outFilterMismatchNoverLmax 0.2 --outFilterScoreMinOverLread 0 --outFilterMatchNminOverLread 0 --outFilterMatchNmin 20 --alignIntronMin 2 --alignIntronMax 1 --outFilterMultimapNmax 1 --alignMatesGapMax 2000 --alignEndsProtrude 10 ConcordantPair	32320882	27840971	0	4479911	27840971	86
nkx-95_2	--outFilterMismatchNoverLmax 0.2 --outFilterScoreMinOverLread 0 --outFilterMatchNminOverLread 0 --outFilterMatchNmin 20 --alignIntronMin 2 --alignIntronMax 1 --outFilterMultimapNmax 1 --alignMatesGapMax 2000 --alignEndsProtrude 10 ConcordantPair	35792417	27640678	0	8151739	27640678	77
PICARD DEDUPLICATION:
PCR bottleneck coefficient (PBC) = non-redundant and uniquely mapping fragments / uniquely mapping fragments (= % of non-redundant fragments)
Sample Id	fragments processed	mitochondrial fragments	% mitochondrial fragments	duplicated fragments removed	unique fragments	pcr bottleneck coefficient	mean fragment size (only for paired-end)	fragments used for further steps (atac: w/o mitchondrial)
isl-75_1	35966349	2002517	5	5194116	30772233	0.85	142	30772233
isl-75_2	20706099	718984	4	15654254	5051845	0.24	20	5051845
isl-75_3	21742471	10201080	47	11216598	10525873	0.48	178	10525873
isl-85_1	18628217	2753108	15	4808161	13820056	0.74	116	13820056
isl-85_2	39019800	7856052	20	19835939	19183861	0.49	132	19183861
isl-85_3	29366698	11564234	40	13587749	15778949	0.53	122	15778949
isl-95_1	22363028	8650577	39	8840755	13522273	0.6	111	13522273
isl-95_2	24206331	9284204	39	9605403	14600928	0.6	123	14600928
islKO_1	19099885	2594722	14	3003556	16096329	0.84	125	16096329
islKO_2	15502053	2154641	14	2378176	13123877	0.84	121	13123877
nkxOE_1	34078450	1891057	5	14031258	20047192	0.58	85	20047192
neg-75_1	15719015	608525	3	1584805	14134210	0.89	116	14134210
neg-85_1	36981280	1952259	5	6687329	30293951	0.81	133	30293951
neg-95_1	26642640	1406797	5	3574227	23068413	0.86	108	23068413
nkx-75_1	58264523	4250601	7	38497706	19766817	0.33	99	19766817
nkx-75_2	17893768	5910702	36	7180901	10712867	0.59	89	10712867
nkx-85_1	20417274	2427318	12	4827799	15589475	0.76	114	15589475
nkx-85_2	32790580	16753844	52	18141252	14649328	0.44	116	14649328
nkx-95_1	27840971	2287207	8	4992413	22848558	0.82	117	22848558
nkx-95_2	27640678	13282865	48	13335181	14305497	0.51	178	14305497
RAW:
Sample Id	Count	Sum	Max	Min	Mean	Median
Jia_Nkx_OE_rep2_R1	19556187	733142486	38	8	37	38
Jia_Nkx_OE_rep3_R1	20129586	754114483	38	8	37	38
Jia_Nkx_OE_rep2_R2	19556187	733158205	38	8	37	38
Jia_Nkx_OE_rep3_R2	20129586	754129496	38	8	37	38
Jia_Isl_nkx_OE_R1	45279202	1684650635	38	8	37	38
Jia_Isl_nkx_OE_R2	45279202	1685079096	38	8	37	38
TRIMMED:
java -jar /mnt/software/x86_64/packages/trimmomatic/0.36/trimmomatic-0.36.jar PE /mnt/workspace1/stefan.guenther/zhou9_ATAC_Porgenitors/raw_OE/Jia_Nkx_OE_rep3_R1.fastq /mnt/workspace1/stefan.guenther/zhou9_ATAC_Porgenitors/raw_OE/Jia_Nkx_OE_rep3_R2.fastq trimmomatic/Jia_Nkx_OE_rep3/Jia_Nkx_OE_rep3_R1_trim.fastq trimmomatic/Jia_Nkx_OE_rep3/Jia_Nkx_OE_rep3_R1_unpaired.fastq trimmomatic/Jia_Nkx_OE_r…
Sample Id	Count	Sum	Max	Min	Mean	Median
Jia_Nkx_OE_rep2_R1_trim	19397947	725508978	38	15	37	38
Jia_Nkx_OE_rep3_R1_trim	19970013	746406429	38	15	37	38
Jia_Nkx_OE_rep2_R2_trim	19397947	722452358	38	15	37	38
Jia_Nkx_OE_rep3_R2_trim	19970013	743336007	38	15	37	38
Jia_Isl_nkx_OE_R1_trim	44824986	1661199978	38	15	37	38
Jia_Isl_nkx_OE_R2_trim	44824986	1654676118	38	15	36	38
STAR:
For paired-end: reads of one fragment are counted as one read (mates are not counted separately)
Sample Id	parameters	fragments processed	fragments with exactly 1 alignment	fragments with multiple alignments	fragments with no alignment	total fragments aligned	% total fragments aligned
OE_1	--outFilterMismatchNoverLmax 0.2 --outFilterScoreMinOverLread 0.66 --outFilterMatchNminOverLread 0.66 --outFilterMatchNmin 20 --alignIntronMax 1 --alignSJDBoverhangMin 999 --outFilterMultimapNmax 1 --alignMatesGapMax 2000 --alignEndsProtrude 10 ConcordantPair	44824986	30487548	0	14337438	30487548	68
OE_2	--outFilterMismatchNoverLmax 0.2 --outFilterScoreMinOverLread 0.66 --outFilterMatchNminOverLread 0.66 --outFilterMatchNmin 20 --alignIntronMax 1 --alignSJDBoverhangMin 999 --outFilterMultimapNmax 1 --alignMatesGapMax 2000 --alignEndsProtrude 10 ConcordantPair	19397947	16654884	0	2743063	16654884	85
OE_3	--outFilterMismatchNoverLmax 0.2 --outFilterScoreMinOverLread 0.66 --outFilterMatchNminOverLread 0.66 --outFilterMatchNmin 20 --alignIntronMax 1 --alignSJDBoverhangMin 999 --outFilterMultimapNmax 1 --alignMatesGapMax 2000 --alignEndsProtrude 10 ConcordantPair	19970013	16923444	0	3046569	16923444	84
PICARD DEDUPLICATION:
PCR bottleneck coefficient (PBC) = non-redundant and uniquely mapping fragments / uniquely mapping fragments (= % of non-redundant fragments)
Sample Id	fragments processed	mitochondrial fragments	% mitochondrial fragments	duplicated fragments removed	unique fragments	pcr bottleneck coefficient	mean fragment size (only for paired-end)	fragments used for further steps (atac: w/o mitchondrial)
OE_1	30487548	1879877	6	12546669	17940879	0.58	91	17940879
OE_2	16654884	566813	3	1792697	14862187	0.89	154	14862187
OE_3	16923444	566626	3	1946973	14976471	0.88	148	14976471
RAW:
Sample Id	Count	Sum	Max	Min	Mean	Median
E8_5_CD31neg_rep2_R1	47134261	1761334866	38	8	37	38
E8_5_CD31neg_rep2_R2	47134261	1761459794	38	8	37	38
E8_5_CD31neg_rep3_R1	18682320	698078174	38	8	37	38
E8_5_CD31neg_rep3_R2	18682320	698118884	38	8	37	38
E8_5_CD31pos_rep1_R1	38754881	1452704706	38	8	37	38
E8_5_CD31pos_rep1_R2	38754881	1452757553	38	8	37	38
E8_5_CD31pos_rep2_R1	3991434	148426482	38	8	37	38
E8_5_CD31pos_rep2_R2	3991434	148474477	38	8	37	38
E8_5_CD31pos_rep3_R1	28263979	1055072186	38	8	37	38
E8_5_CD31pos_rep3_R2	28263979	1055164000	38	8	37	38
E9_5_CD31neg_rep1_R1	19474560	728590072	38	8	37	38
E9_5_CD31neg_rep1_R2	19474560	728596401	38	8	37	38
E9_5_CD31neg_rep2_R1	27191317	1014539946	38	8	37	38
E9_5_CD31neg_rep2_R2	27191317	1014610004	38	8	37	38
E9_5_CD31pos_rep1_R1	34214399	1279664061	38	8	37	38
E9_5_CD31pos_rep1_R2	34214399	1279676439	38	8	37	38
E9_5_CD31pos_rep2_R1	23418014	876680766	38	8	37	38
E9_5_CD31pos_rep2_R2	23418014	876673931	38	8	37	38
TRIMMED:
java -jar /mnt/software/x86_64/packages/trimmomatic/0.36/trimmomatic-0.36.jar ... SLIDINGWINDOW:5:15 HEADCROP:0 CROP:500 MINLEN:15
Sample Id	Count	Sum	Max	Min	Mean	Median
E8_5_CD31neg_rep2_R1_trim	46746627	1742512664	38	15	37	38
E8_5_CD31neg_rep2_R2_trim	46746627	1737728599	38	15	37	38
E8_5_CD31neg_rep3_R1_trim	18518784	689994807	38	15	37	38
E8_5_CD31neg_rep3_R2_trim	18518784	687830296	38	15	37	38
E8_5_CD31pos_rep1_R1_trim	38415727	1435865553	38	15	37	38
E8_5_CD31pos_rep1_R2_trim	38415727	1431192116	38	15	37	38
E8_5_CD31pos_rep2_R1_trim	3951747	146681605	38	15	37	38
E8_5_CD31pos_rep2_R2_trim	3951747	146218556	38	15	37	38
E8_5_CD31pos_rep3_R1_trim	28016614	1042895872	38	15	37	38
E8_5_CD31pos_rep3_R2_trim	28016614	1039675869	38	15	37	38
E9_5_CD31neg_rep1_R1_trim	19310327	721067186	38	15	37	38
E9_5_CD31neg_rep1_R2_trim	19310327	719049702	38	15	37	38
E9_5_CD31neg_rep2_R1_trim	26949788	1003112152	38	15	37	38
E9_5_CD31neg_rep2_R2_trim	26949788	1000111734	38	15	37	38
E9_5_CD31pos_rep1_R1_trim	33921224	1265347738	38	15	37	38
E9_5_CD31pos_rep1_R2_trim	33921224	1261423556	38	15	37	38
E9_5_CD31pos_rep2_R1_trim	23215537	866780775	38	15	37	38
E9_5_CD31pos_rep2_R2_trim	23215537	864108316	38	15	37	38
STAR:
For paired-end: reads of one fragment are counted as one read (mates are not counted separately)
Sample Id	parameters	fragments processed	fragments with exactly 1 alignment	fragments with multiple alignments	fragments with no alignment	total fragments aligned	% total fragments aligned
E8-5-CD31-neg_2	--outFilterMismatchNoverLmax 0.2 --outFilterScoreMinOverLread 0.66 --outFilterMatchNminOverLread 0.66 --outFilterMatchNmin 20 --alignIntronMax 1 --alignSJDBoverhangMin 999 --outFilterMultimapNmax 1 --alignEndsProtrude 10 ConcordantPair	46746627	35787845	0	10958782	35787845	76
E8-5-CD31-neg_3	--outFilterMismatchNoverLmax 0.2 --outFilterScoreMinOverLread 0.66 --outFilterMatchNminOverLread 0.66 --outFilterMatchNmin 20 --alignIntronMax 1 --alignSJDBoverhangMin 999 --outFilterMultimapNmax 1 --alignEndsProtrude 10 ConcordantPair	18518784	15351773	0	3167011	15351773	82
E8-5-CD31-pos_1	--outFilterMismatchNoverLmax 0.2 --outFilterScoreMinOverLread 0.66 --outFilterMatchNminOverLread 0.66 --outFilterMatchNmin 20 --alignIntronMax 1 --alignSJDBoverhangMin 999 --outFilterMultimapNmax 1 --alignEndsProtrude 10 ConcordantPair	38415727	27747600	0	10668127	27747600	72
E8-5-CD31-pos_2	--outFilterMismatchNoverLmax 0.2 --outFilterScoreMinOverLread 0.66 --outFilterMatchNminOverLread 0.66 --outFilterMatchNmin 20 --alignIntronMax 1 --alignSJDBoverhangMin 999 --outFilterMultimapNmax 1 --alignEndsProtrude 10 ConcordantPair	3951747	2866877	0	1084870	2866877	72
E8-5-CD31-pos_3	--outFilterMismatchNoverLmax 0.2 --outFilterScoreMinOverLread 0.66 --outFilterMatchNminOverLread 0.66 --outFilterMatchNmin 20 --alignIntronMax 1 --alignSJDBoverhangMin 999 --outFilterMultimapNmax 1 --alignEndsProtrude 10 ConcordantPair	28016614	22554830	0	5461784	22554830	80
E9-5-CD31-neg_1	--outFilterMismatchNoverLmax 0.2 --outFilterScoreMinOverLread 0.66 --outFilterMatchNminOverLread 0.66 --outFilterMatchNmin 20 --alignIntronMax 1 --alignSJDBoverhangMin 999 --outFilterMultimapNmax 1 --alignEndsProtrude 10 ConcordantPair	19310327	14832628	0	4477699	14832628	76
E9-5-CD31-neg_2	--outFilterMismatchNoverLmax 0.2 --outFilterScoreMinOverLread 0.66 --outFilterMatchNminOverLread 0.66 --outFilterMatchNmin 20 --alignIntronMax 1 --alignSJDBoverhangMin 999 --outFilterMultimapNmax 1 --alignEndsProtrude 10 ConcordantPair	26949788	19225446	0	7724342	19225446	71
E9-5-CD31-pos_1	--outFilterMismatchNoverLmax 0.2 --outFilterScoreMinOverLread 0.66 --outFilterMatchNminOverLread 0.66 --outFilterMatchNmin 20 --alignIntronMax 1 --alignSJDBoverhangMin 999 --outFilterMultimapNmax 1 --alignEndsProtrude 10 ConcordantPair	33921224	19810644	0	14110580	19810644	58
E9-5-CD31-pos_2	--outFilterMismatchNoverLmax 0.2 --outFilterScoreMinOverLread 0.66 --outFilterMatchNminOverLread 0.66 --outFilterMatchNmin 20 --alignIntronMax 1 --alignSJDBoverhangMin 999 --outFilterMultimapNmax 1 --alignEndsProtrude 10 ConcordantPair	23215537	16229274	0	6986263	16229274	69
PICARD DEDUPLICATION:
PCR bottleneck coefficient (PBC) = non-redundant and uniquely mapping fragments / uniquely mapping fragments (= % of non-redundant fragments)
Sample Id	fragments processed	mitochondrial fragments	% mitochondrial fragments	duplicated fragments removed	unique fragments	pcr bottleneck coefficient	mean fragment size (only for paired-end)	fragments used for further steps (atac: w/o mitchondrial)
E8-5-CD31-neg_2	35787845	1911690	5	4004572	31783273	0.88	90	31783273
E8-5-CD31-neg_3	15351773	1454048	9	2227291	13124482	0.85	134	13124482
E8-5-CD31-pos_1	27747600	2516907	9	10154389	17593211	0.63	108	17593211
E8-5-CD31-pos_2	2866877	924485	32	719297	2147580	0.74	80	2147580
E8-5-CD31-pos_3	22554830	1881688	8	3766359	18788471	0.83	98	18788471
E9-5-CD31-neg_1	14832628	2926958	19	3663158	11169470	0.75	141	11169470				1
E9-5-CD31-neg_2	19225446	3385664	17	4062203	15163243	0.78	121	15163243
E9-5-CD31-pos_1	19810644	2963617	14	4642409	15168235	0.76	121	15168235
E9-5-CD31-pos_2	16229274	2829047	17	4492384	11736890	0.72	121	11736890
