# Supplementary material for: Single cell RNA-seq and ATAC-seq analysis of cardiac progenitor cell transition states and lineage settlement
Source: Nat Commun. 2018 Nov 19;9:4877. doi: 10.1038/s41467-018-07307-6 (PMC6242939; doi:10.1038/s41467-018-07307-6)
Supplement: Supplementary file 10 — Supplementary Data 6 [file 41467_2018_7307_MOESM10_ESM.xlsx]

## Sheet: Differential peaks
PeakID (cmd=annotatePeaks.pl KO_DEpeaks_pos.bed mm10)	Chr	Start	End	Strand	Peak Score	Focus Ratio/Region Size	Annotation	Detailed Annotation	Distance to TSS	Nearest PromoterID	Entrez ID	Nearest Unigene	Nearest Refseq	Nearest Ensembl	Gene Name	Gene Alias	Gene Description	Gene Type
upeaks-15359	chr15	10598828	10599108	+	0	NA	intron (NM_001166408, intron 5 of 17)	intron (NM_001166408, intron 5 of 17)	-1325	NR_033541	100038608	Mm.450744	NR_033541		Gm10389	ENSMUSG00000072658	predicted gene 10389	ncRNA
upeaks-3145	chr1	191946651	191947000	+	0	NA	Intergenic	MER53|DNA|hAT	-30545	NM_023727	74023	Mm.274393	NM_023727	ENSMUSG00000049353	Rd3	3322402L07Rik|rd-3|rd3	retinal degeneration 3	protein-coding
upeaks-4446	chr10	75130467	75130696	+	0	NA	intron (NM_001081412, intron 2 of 22)	intron (NM_001081412, intron 2 of 22)	69685	NM_001081412	110279	Mm.333722	NM_001081412	ENSMUSG00000009681	Bcr	5133400C09Rik|AI561783|AI853148|mKIAA3017	breakpoint cluster region	protein-coding
upeaks-42336	chr8	27210453	27210764	+	0	NA	Intergenic	RMER5|LTR|ERV1	-8061	NM_029674	76615	Mm.272794	NM_029674	ENSMUSG00000039720	Got1l1	1700083M11Rik	glutamic-oxaloacetic transaminase 1-like 1	protein-coding
upeaks-6397	chr11	31824803	31825207	+	0	NA	promoter-TSS (NR_102314)	promoter-TSS (NR_102314)	-458	NR_102312	414116	Mm.150222	NR_102310	ENSMUSG00000085772	D630024D03Rik	-	RIKEN cDNA D630024D03 gene	ncRNA
upeaks-25145	chr2	79607281	79607482	+	0	NA	Intergenic	Intergenic	-28044	NM_080558	70599	Mm.272881	NM_080558	ENSMUSG00000027007	Ssfa2	5730488C15Rik|CS-1|CS1|KRAP|SPAG13|mKIAA1927	sperm specific antigen 2	protein-coding
upeaks-9357	chr12	16841064	16841328	+	0	NA	Intergenic	Intergenic	30231	NM_033270	50496	Mm.23296	NM_033270	ENSMUSG00000057469	E2f6	AI462434|E2F6a|E2F6b|EMA	E2F transcription factor 6	protein-coding
upeaks-31744	chr4	109257632	109257943	+	0	NA	Intergenic	Intergenic	22155	NM_001033226	108802	Mm.318248	NM_001033226	ENSMUSG00000028558	Calr4	4933403L16Rik|AU017583	calreticulin 4	protein-coding
upeaks-3139	chr1	191840716	191841302	+	0	NA	Intergenic	Intergenic	19536	NM_010892	18005	Mm.33773	NM_010892	ENSMUSG00000026622	Nek2	AA617254|C77054	NIMA (never in mitosis gene a)-related expressed kinase 2	protein-coding
upeaks-31691	chr4	107628958	107629234	+	0	NA	intron (NM_147221, intron 8 of 10)	intron (NM_147221, intron 8 of 10)	55066	NM_019872	56296	Mm.141324	NM_019872	ENSMUSG00000028610	Dmrtb1	Dmrt6|Prp13	DMRT-like family B with proline-rich C-terminal, 1	protein-coding
upeaks-26939	chr2	163541645	163542090	+	0	NA	promoter-TSS (NR_027970)	promoter-TSS (NR_027970)	-146	NR_027970	68314	Mm.46190	NM_197983	ENSMUSG00000046840	Hnf4aos	0610008F07Rik	hepatic nuclear factor 4 alpha, opposite strand	ncRNA
upeaks-43006	chr8	71807859	71808094	+	0	NA	Intergenic	RLTR1D|LTR|ERV1	-74092	NM_145624	236193	Mm.290790	NM_145624	ENSMUSG00000056019	Zfp709	BC021921|GIOT-4|HIT-40	zinc finger protein 709	protein-coding
upeaks-10351	chr12	84612574	84613018	+	0	NA	exon (NM_008992, exon 5 of 19)	exon (NM_008992, exon 5 of 19)	4670	NM_008992	19300	Mm.229109	NM_008992	ENSMUSG00000021240	Abcd4	P69r|P70R|Pxmp1l	ATP-binding cassette, sub-family D (ALD), member 4	protein-coding
upeaks-14977	chr14	105572500	105572785	+	0	NA	Intergenic	Intergenic	-16907	NR_102319	380930	Mm.427836	NR_102319		9330188P03Rik	Gm1589|mgt-6	RIKEN cDNA 9330188P03 gene	ncRNA
upeaks-15221	chr14	122902112	122902392	+	0	NA	intron (NM_145466, intron 1 of 2)	intron (NM_145466, intron 1 of 2)	10913	NM_145466	223267	Mm.379358	NM_145466	ENSMUSG00000041625	Ggact	A2ld1	gamma-glutamylamine cyclotransferase	protein-coding
upeaks-36517	chr6	23553084	23553320	+	0	NA	intron (NM_001252107, intron 6 of 13)	LTR10_RN|LTR|ERVK	97103	NM_198251	386611	Mm.436547	NM_198251	ENSMUSG00000051956	Rnf133	Greul2	ring finger protein 133	protein-coding
upeaks-6931	chr11	59227968	59228591	+	0	NA	promoter-TSS (NM_007476)	promoter-TSS (NM_007476)	-12	NM_007476	11840	Mm.371546	NM_007476	ENSMUSG00000048076	Arf1	-	ADP-ribosylation factor 1	protein-coding
upeaks-15773	chr15	50870778	50871024	+	0	NA	intron (NM_032000, intron 1 of 5)	MIRb|SINE|MIR	18148	NM_001310481	83925	Mm.30466	NM_032000	ENSMUSG00000038679	Trps1	AI115454|AI447310|D15Ertd586e	trichorhinophalangeal syndrome I (human)	protein-coding
upeaks-31155	chr4	71307167	71307503	+	0	NA	Intergenic	Intergenic	-772407	NM_172694	230316	Mm.251188	NM_172694	ENSMUSG00000039270	Megf9	4933405H16Rik|9630025C07|Egfl5|mKIAA0818	multiple EGF-like-domains 9	protein-coding
upeaks-13663	chr14	25585622	25586047	+	0	NA	promoter-TSS (NR_033492)	promoter-TSS (NR_033492)	-970	NR_033492	77592	Mm.444871	NM_175264		4931406H21Rik	-	RIKEN cDNA 4931406H21 gene	ncRNA
upeaks-47474	chrX	73191990	73192279	+	0	NA	promoter-TSS (NM_001081643)	promoter-TSS (NM_001081643)	-45	NM_001081643	574437	Mm.482923	NM_001081643	ENSMUSG00000073125	Xlr3b	EG574437|Xlr3	X-linked lymphocyte-regulated 3B	protein-coding
upeaks-22567	chr19	10951926	10952378	+	0	NA	Intergenic	Intergenic	-2886	NM_023731	108673	Mm.294908	NM_023731	ENSMUSG00000024732	Ccdc86	4933411H20Rik|6720480F16Rik|D19Ertd678e	coiled-coil domain containing 86	protein-coding
upeaks-11176	chr13	8406010	8406537	+	0	NA	intron (NR_110345, intron 1 of 10)	intron (NR_110345, intron 1 of 10)	203407	NR_110345	94191	Mm.425794	NM_052977	ENSMUSG00000052551	Adarb2	Adar3|RED2	adenosine deaminase, RNA-specific, B2	protein-coding
upeaks-44610	chr9	19093262	19093715	+	0	NA	Intergenic	RLTR9D|LTR|ERVK	-27469	NM_146564	258557	Mm.377566	NM_146564	ENSMUSG00000059303	Olfr836	MOR152-3	olfactory receptor 836	protein-coding
upeaks-6814	chr11	54162818	54163354	+	0	NA	Intergenic	Intergenic	50202	NR_045506	71056	Mm.56332	NR_045506	ENSMUSG00000086209	4933405E24Rik	-	RIKEN cDNA 4933405E24 gene	ncRNA
upeaks-25656	chr2	113701480	113701890	+	0	NA	intron (NR_040614, intron 1 of 5)	intron (NR_040614, intron 1 of 5)	6865	NR_040614	75166	Mm.410811	NR_040614	ENSMUSG00000084798	4930533B01Rik	-	RIKEN cDNA 4930533B01 gene	ncRNA
upeaks-8631	chr11	109349968	109350694	+	0	NA	intron (NR_027883, intron 1 of 1)	intron (NR_027883, intron 1 of 1)	3464	NR_027883	67927	Mm.394490	NR_027883	ENSMUSG00000099630	1700096J18Rik	-	RIKEN cDNA 1700096J18 gene	ncRNA
upeaks-42558	chr8	43913476	43913738	+	0	NA	Intergenic	RLTR30C_MM|LTR|ERV1	-214116	NM_001079931	384814	Mm.491652	NM_001079931		Gm5347	EG384814	predicted gene 5347	protein-coding
upeaks-14635	chr14	75188078	75188305	+	0	NA	intron (NM_008879, intron 2 of 16)	intron (NM_008879, intron 2 of 16)	51766	NM_008879	18826	Mm.153911	NM_008879	ENSMUSG00000021998	Lcp1	AW536232|D14Ertd310e|LCP-1|Pls2|pp65	lymphocyte cytosolic protein 1	protein-coding
upeaks-42611	chr8	46447421	46447647	+	0	NA	Intergenic	MTD|LTR|ERVL-MaLR	-23503	NM_007981	14081	Mm.210323	NM_007981	ENSMUSG00000018796	Acsl1	Acas|Acas1|Acs|FACS|Facl2|LACS 1|LACS1	acyl-CoA synthetase long-chain family member 1	protein-coding
upeaks-2092	chr1	151216422	151216677	+	0	NA	Intergenic	Intergenic	78515	NR_038011	402734	Mm.337666	NR_038011		C730036E19Rik	lncLSTR	RIKEN cDNA C730036E19 gene	ncRNA
upeaks-296	chr1	24195933	24196544	+	0	NA	intron (NM_007740, intron 7 of 37)	intron (NM_007740, intron 7 of 37)	1035	NM_001290691	12839	Mm.154662	NM_007740	ENSMUSG00000026147	Col9a1	Col9a-1	collagen, type IX, alpha 1	protein-coding
upeaks-37678	chr6	91700828	91701054	+	0	NA	intron (NM_009320, intron 2 of 14)	intron (NM_009320, intron 2 of 14)	16874	NM_009320	21366	Mm.395650	NM_009320	ENSMUSG00000030096	Slc6a6	AA589629|C80501|Taut	solute carrier family 6 (neurotransmitter transporter, taurine), member 6	protein-coding
upeaks-23922	chr2	20724384	20724648	+	0	NA	intron (NM_029895, intron 6 of 18)	intron (NM_029895, intron 6 of 18)	205003	NM_001177630	208618	Mm.237935	NM_029895	ENSMUSG00000036617	Etl4	6620402G01Rik|9430077C05Rik|BC026657|E330027G05Rik|Etl-4|Skt	enhancer trap locus 4	protein-coding
upeaks-32559	chr4	135752795	135753245	+	0	NA	3' UTR (NM_178257, exon 7 of 7)	3' UTR (NM_178257, exon 7 of 7)	-6695	NM_001085509	242702	Mm.318639	NM_001085509	ENSMUSG00000037139	Myom3	8430427K15Rik|Gm434	myomesin family, member 3	protein-coding
upeaks-17577	chr16	23225997	23226240	+	0	NA	promoter-TSS (NM_001252505)	promoter-TSS (NM_001252505)	97	NM_001252505	20440	Mm.149029	NM_145933	ENSMUSG00000022885	St6gal1	AW742324|Siat1|St6Gal-I|St6gal|St6galI	beta galactoside alpha 2,6 sialyltransferase 1	protein-coding
upeaks-32475	chr4	133898707	133899028	+	0	NA	Intergenic	Intergenic	-11070	NM_009097	20111	Mm.301827	NM_009097	ENSMUSG00000003644	Rps6ka1	Mapkapk-1a|Rsk|Rsk-1|Rsk1|S6K-alpha-1|p90-Rsk1|p90Rsk1|p90S6K|p90rsk	ribosomal protein S6 kinase polypeptide 1	protein-coding
upeaks-3253	chr10	3718397	3718698	+	0	NA	Intergenic	Intergenic	-21830	NM_001159942	213783	Mm.150831	NM_001033253	ENSMUSG00000040624	Plekhg1	D10Ertd733e|Gm521|mKIAA1209	pleckstrin homology domain containing, family G (with RhoGef domain) member 1	protein-coding
upeaks-30116	chr3	153223088	153223455	+	0	NA	intron (NM_011372, intron 3 of 4)	Lx5c|LINE|L1	-71163	NR_108044	75001		NR_108044		4930482G09Rik	-	RIKEN cDNA 4930482G09 gene	ncRNA
upeaks-14411	chr14	63885299	63885508	+	0	NA	intron (NM_028228, intron 6 of 6)	MTEa|LTR|ERVL-MaLR	25091	NM_028228	72400	Mm.379214	NM_028228	ENSMUSG00000021958	Pinx1	2210403I16Rik|2610028A01Rik|67-11-3|AU024023|LPTS|LPTS1	PIN2/TERF1 interacting, telomerase inhibitor 1	protein-coding
upeaks-5357	chr10	112229152	112229449	+	0	NA	Intergenic	RLTR13G|LTR|ERVK	-41823	NM_001025581	268345	Mm.336242	NM_001025581	ENSMUSG00000035681	Kcnc2	AW047325|B230117I07|KShIIIA|Kv3.2	potassium voltage gated channel, Shaw-related subfamily, member 2	protein-coding
upeaks-8701	chr11	112209489	112209688	+	0	NA	Intergenic	Intergenic	501768	NR_024085	217294	Mm.297761	NM_146031	ENSMUSG00000041674	BC006965	-	cDNA sequence BC006965	ncRNA
upeaks-3780	chr10	35261269	35261497	+	0	NA	Intergenic	Intergenic	777983	NM_010237	14302	Mm.332432	NM_010237	ENSMUSG00000019779	Frk	BSK|BSK/IYK|C85044|GTK|RAK	fyn-related kinase	protein-coding
upeaks-34572	chr5	91603876	91604089	+	0	NA	intron (NM_145562, intron 2 of 3)	intron (NM_145562, intron 2 of 3)	86282	NM_145562	231440	Mm.5002	NM_145562	ENSMUSG00000034981	Parm1	2210012L08Rik|9130213B05Rik|W91666	prostate androgen-regulated mucin-like protein 1	protein-coding
upeaks-38513	chr6	134515443	134515754	+	0	NA	intron (NM_008514, intron 3 of 22)	RLTR12B|LTR|ERVK	51315	NM_008514	16974	Mm.321990	NM_008514	ENSMUSG00000030201	Lrp6	C030016K15Rik|Cd|Gw|ska26|ska<m26Jus>|skax26	low density lipoprotein receptor-related protein 6	protein-coding
upeaks-26389	chr2	144308602	144309011	+	0	NA	intron (NM_152947, intron 3 of 3)	intron (NM_152947, intron 3 of 3)	22556	NM_152947	107586	Mm.252750	NM_026924	ENSMUSG00000037279	Ovol2	1700108N11Rik|1810007D21Rik|M-OVO|M-OVO-A|M-OVO-B|MOVO|Ovo2|Zfp339|movo2	ovo like zinc finger 2	protein-coding
upeaks-46133	chr9	86647942	86648229	+	0	NA	intron (NM_008615, intron 5 of 13)	intron (NM_008615, intron 5 of 13)	39192	NM_001198933	17436	Mm.148155	NM_008615	ENSMUSG00000032418	Me1	D9Ertd267e|Mdh-1|Mod-1|Mod1	malic enzyme 1, NADP(+)-dependent, cytosolic	protein-coding
upeaks-34490	chr5	87416709	87416908	+	0	NA	intron (NM_133894, intron 3 of 5)	Lx2|LINE|L1	7395	NM_133894	100559	Mm.212589	NM_133894	ENSMUSG00000061906	Ugt2b38	9430041C03Rik|AA986709	UDP glucuronosyltransferase 2 family, polypeptide B38	protein-coding
upeaks-24070	chr2	26595149	26595460	+	0	NA	intron (NM_026212, intron 4 of 5)	intron (NM_026212, intron 4 of 5)	-3884	NR_106155	102465787		NR_106155	ENSMUSG00000105799	Mir126b	mmu-mir-126b	microRNA 126b	ncRNA
upeaks-31068	chr4	63156777	63157450	+	0	NA	Intergenic	Intergenic	-2941	NM_007443	11699	Mm.2197	NM_007443	ENSMUSG00000028356	Ambp	AI194774|ASPI|HI-30|Intin4|Itil|UTI	alpha 1 microglobulin/bikunin	protein-coding
upeaks-23781	chr2	13329849	13330273	+	0	NA	intron (NM_001081084, intron 48 of 66)	intron (NM_001081084, intron 48 of 66)	-58646	NM_009105	20163	Mm.905	NM_009105	ENSMUSG00000026727	Rsu1	RsuI|rsp-1	Ras suppressor protein 1	protein-coding
upeaks-28982	chr3	99812982	99813192	+	0	NA	Intergenic	Intergenic	-72330	NM_028892	74362	Mm.55847	NM_028892	ENSMUSG00000027867	Spag17	4931427F14Rik|PF6|Spag17-ps	sperm associated antigen 17	protein-coding
upeaks-37487	chr6	85293678	85293980	+	0	NA	intron (NM_178639, intron 3 of 13)	intron (NM_178639, intron 3 of 13)	39593	NM_178639	94282	Mm.121485	NM_178639	ENSMUSG00000033720	Sfxn5	C230001H08Rik	sideroflexin 5	protein-coding
upeaks-12761	chr13	94838157	94838415	+	0	NA	intron (NM_009321, intron 3 of 3)	intron (NM_009321, intron 3 of 3)	-37341	NM_011021	18420	Mm.42051	NM_011021	ENSMUSG00000021685	Otp	-	orthopedia homeobox	protein-coding
upeaks-36253	chr5	151176062	151176369	+	0	NA	intron (NM_146258, intron 1 of 13)	intron (NM_146258, intron 1 of 13)	13978	NM_001163493	243362	Mm.209272	NM_146258	ENSMUSG00000016128	Stard13	DLC2|GT650	StAR-related lipid transfer (START) domain containing 13	protein-coding
upeaks-20762	chr18	6504191	6504398	+	0	NA	intron (NM_007935, intron 1 of 13)	intron (NM_007935, intron 1 of 13)	11814	NM_007935	13831	Mm.312133	NM_007935	ENSMUSG00000024240	Epc1	2400007E14Rik|5730566F07Rik|A930032N02Rik|mir-1893	enhancer of polycomb homolog 1 (Drosophila)	protein-coding
upeaks-591	chr1	51076229	51076561	+	0	NA	intron (NM_019790, intron 5 of 9)	intron (NM_019790, intron 5 of 9)	148872	NM_019790	56363	Mm.245154	NM_019790	ENSMUSG00000026109	Tmeff2	4832418D20Rik|7630402F16Rik|TR-2	transmembrane protein with EGF-like and two follistatin-like domains 2	protein-coding
upeaks-42678	chr8	54042374	54042577	+	0	NA	Intergenic	Intergenic	-35057	NM_009506	22341	Mm.1402	NM_009506	ENSMUSG00000031520	Vegfc	AW228853|VEGF-C	vascular endothelial growth factor C	protein-coding
upeaks-3997	chr10	45229729	45230614	+	0	NA	Intergenic	Intergenic	-59134	NM_024286	78977	Mm.24748	NM_024286	ENSMUSG00000019848	Popdc3	AA682104|Pop3	popeye domain containing 3	protein-coding
upeaks-40493	chr7	89456370	89456604	+	0	NA	Intergenic	Intergenic	30181	NR_102276	101521	Mm.26902	NR_102276	ENSMUSG00000109311	AI314278	-	expressed sequence AI314278	ncRNA
upeaks-30016	chr3	148867649	148868001	+	0	NA	intron (NM_001081298, intron 2 of 23)	intron (NM_001081298, intron 2 of 23)	86810	NM_001081298	99633	Mm.9776	NM_001081298	ENSMUSG00000028184	Adgrl2	AI450192|CIRL-2|Gm619|Lec1|Lphh1|Lphn2|mKIAA0786	adhesion G protein-coupled receptor L2	protein-coding
upeaks-19706	chr17	44367627	44367863	+	0	NA	Intergenic	Intergenic	179173	NM_172621	224796	Mm.37666	NM_172621	ENSMUSG00000023959	Clic5	5730531E12Rik|B330005L24|Gm322|jbg	chloride intracellular channel 5	protein-coding
upeaks-29670	chr3	133241918	133242277	+	0	NA	Intergenic	Intergenic	-7208	NM_029953	77669	Mm.98630	NM_029953	ENSMUSG00000040969	Arhgef38	9130221D24Rik|D630013G24Rik	Rho guanine nucleotide exchange factor (GEF) 38	protein-coding
upeaks-7893	chr11	89021018	89021260	+	0	NA	TTS (NM_009546)	TTS (NM_009546)	21736	NM_009546	217069	Mm.248445	NM_009546	ENSMUSG00000000275	Trim25	AA960166|AL022677|EFP|Zfp147	tripartite motif-containing 25	protein-coding
upeaks-44589	chr9	15779379	15779588	+	0	NA	Intergenic	Intergenic	69714	NM_172289	234967	Mm.138815	NM_172289	ENSMUSG00000043885	Slc36a4	6330573I15Rik|PAT4	solute carrier family 36 (proton/amino acid symporter), member 4	protein-coding
upeaks-46927	chr9	119215399	119215660	+	0	NA	Intergenic	LTRIS2|LTR|ERV1	-6424	NM_133980	102570	Mm.38775	NM_133980	ENSMUSG00000074028	Slc22a13	AI648912|OCTL1|OCTL3|ORCTL3	solute carrier family 22 (organic cation transporter), member 13	protein-coding
upeaks-15544	chr15	32190539	32190814	+	0	NA	Intergenic	MTD|LTR|ERVL-MaLR	13387	NM_020503	57254	Mm.377133	NM_020503	ENSMUSG00000045267	Tas2r119	T2r19|Tas2r19|mGR19|mt2r19	taste receptor, type 2, member 119	protein-coding
upeaks-3265	chr10	3978457	3978699	+	0	NA	intron (NM_172308, intron 1 of 27)	intron (NM_172308, intron 1 of 27)	5503	NM_172308	270685	Mm.184752	NM_172308	ENSMUSG00000040675	Mthfd1l	2410004L15Rik|AI647056|Fthfsdc1	methylenetetrahydrofolate dehydrogenase (NADP+ dependent) 1-like	protein-coding
upeaks-21438	chr18	49290773	49290990	+	0	NA	Intergenic	Intergenic	-232408	NR_033785	67321	Mm.245802	NR_033785	ENSMUSG00000100297	1700044K03Rik	-	RIKEN cDNA 1700044K03 gene	ncRNA
upeaks-7712	chr11	83932794	83933052	+	0	NA	Intergenic	L1MC4a|LINE|L1	-9167	NM_030096	78394	Mm.280544	NM_030096	ENSMUSG00000020677	Ddx52	2700029C06Rik|ROK1	DEAD (Asp-Glu-Ala-Asp) box polypeptide 52	protein-coding
upeaks-34022	chr5	46573105	46573338	+	0	NA	Intergenic	Intergenic	-640812	NR_110478	78106	Mm.243807	NR_110478	ENSMUSG00000106602	4930405L22Rik	-	RIKEN cDNA 4930405L22 gene	ncRNA
upeaks-33750	chr5	32778709	32778908	+	0	NA	intron (NM_177298, intron 1 of 7)	ORR1C2|LTR|ERVL-MaLR	6818	NM_177298	320951	Mm.273765	NM_177298	ENSMUSG00000023452	Pisd	9030221M09Rik	phosphatidylserine decarboxylase	protein-coding
upeaks-11663	chr13	34227541	34228058	+	0	NA	intron (NM_001033167, intron 3 of 10)	intron (NM_001033167, intron 3 of 10)	64835	NM_001101430	69666	Mm.24788	NM_001101430	ENSMUSG00000071451	Psmg4	PAC-4|mPAC4	proteasome (prosome, macropain) assembly chaperone 4	protein-coding
upeaks-3801	chr10	37337111	37337658	+	0	NA	Intergenic	Intergenic	-198458	NM_008538	17118	Mm.30059	NM_008538	ENSMUSG00000069662	Marcks	Macs|PKCSL	myristoylated alanine rich protein kinase C substrate	protein-coding
upeaks-13706	chr14	27206150	27206355	+	0	NA	intron (NM_001289686, intron 2 of 12)	intron (NM_001289686, intron 2 of 12)	-31758	NM_027871	71704	Mm.248606	NM_027871	ENSMUSG00000021895	Arhgef3	1200004I24Rik|9830169H03Rik|C76747|Xpln	Rho guanine nucleotide exchange factor (GEF) 3	protein-coding
upeaks-27742	chr3	27585285	27585552	+	0	NA	promoter-TSS (NR_037275)	promoter-TSS (NR_037275)	-423	NR_037275	100526525		NR_037275	ENSMUSG00000092695	Mir3092	mir-3092|mmu-mir-3092	microRNA 3092	ncRNA
upeaks-42440	chr8	34986184	34986490	+	0	NA	Intergenic	Intergenic	-20647	NM_175091	21951	Mm.88364	NM_175091	ENSMUSG00000031529	Tnks	4930554K12Rik|AI662855|ARTD5|C86528|D130072O21Rik|TANK1|mTNKS1	tankyrase, TRF1-interacting ankyrin-related ADP-ribose polymerase	protein-coding
upeaks-45973	chr9	77636750	77636960	+	0	NA	intron (NM_172925, intron 1 of 2)	intron (NM_172925, intron 1 of 2)	123	NM_172925	244923	Mm.138238	NM_172925	ENSMUSG00000044938	Klhl31	9830147P19Rik|D930047P17Rik|Kbtbd1	kelch-like 31	protein-coding
upeaks-709	chr1	58936820	58937144	+	0	NA	intron (NM_172406, intron 2 of 15)	MTE2b|LTR|ERVL-MaLR	36500	NM_172406	70827	Mm.222887	NM_172406	ENSMUSG00000026028	Trak2	2900022D04Rik|4733401O11Rik|AI480836|AW046271|Als2cr3|CALS-C|GRIF-1|GRIF1|OIP98|mKIAA0549	trafficking protein, kinesin binding 2	protein-coding
upeaks-35501	chr5	127580969	127581233	+	0	NA	Intergenic	Intergenic	36291	NM_133895	100561	Mm.28506	NM_133895	ENSMUSG00000029416	Slc15a4	AA987064|AW742963|C130069N12Rik|PHT1|PTR4	solute carrier family 15, member 4	protein-coding
upeaks-2407	chr1	164135344	164135777	+	0	NA	intron (NM_011347, intron 8 of 15)	intron (NM_011347, intron 8 of 15)	-16275	NM_007976	14067	Mm.12900	NM_007976	ENSMUSG00000026579	F5	AI173222|Cf-5|Cf5	coagulation factor V	protein-coding
upeaks-46806	chr9	114995265	114995650	+	0	NA	Intergenic	Intergenic	-61470	NM_175380	333433	Mm.38198	NM_175380	ENSMUSG00000050627	Gpd1l	2210409H23Rik|D9Ertd660e	glycerol-3-phosphate dehydrogenase 1-like	protein-coding
upeaks-702	chr1	58652046	58652312	+	0	NA	promoter-TSS (NR_045007)	promoter-TSS (NR_045007)	-462	NR_045007	100504501	Mm.440933	NR_045007	ENSMUSG00000102059	Gm20257	-	caspase 8 pseudogene	pseudo
upeaks-21256	chr18	38171621	38171841	+	0	NA	Intergenic	Intergenic	38031	NM_029357	75599	Mm.36560	NM_029357	ENSMUSG00000051375	Pcdh1	2010005A06Rik|AI585920	protocadherin 1	protein-coding
upeaks-20699	chr17	94571726	94571925	+	0	NA	Intergenic	Intergenic	178067	NM_176917	76781	Mm.139146	NM_176917	ENSMUSG00000055660	Mettl4	2410198H06Rik|A730091E08Rik|AV296509|HsT661	methyltransferase like 4	protein-coding
upeaks-15202	chr14	122200291	122200718	+	0	NA	intron (NM_029556, intron 1 of 7)	intron (NM_029556, intron 1 of 7)	18810	NM_029556	69634	Mm.34608	NM_029556	ENSMUSG00000025545	Clybl	0610033J05Rik|2310014M14Rik|AI256068|Clb	citrate lyase beta like	protein-coding
upeaks-41374	chr7	127900102	127900351	+	0	NA	Intergenic	Intergenic	-3847	NM_009739	12041	Mm.425495	NM_009739	ENSMUSG00000030802	Bckdk	AI327402	branched chain ketoacid dehydrogenase kinase	protein-coding
upeaks-24301	chr2	31868836	31869052	+	0	NA	Intergenic	Intergenic	-18337	NM_011836	23928	Mm.302362	NM_011836	ENSMUSG00000026840	Lamc3	AI562206|AW240805	laminin gamma 3	protein-coding
upeaks-10225	chr12	80168220	80168467	+	0	NA	exon (NM_134156, exon 21 of 21)	exon (NM_134156, exon 21 of 21)	-35499	NR_033514	69548	Mm.269712	NR_033514	ENSMUSG00000097729	2310015A10Rik	5330419I17Rik	RIKEN cDNA 2310015A10 gene	ncRNA
upeaks-34057	chr5	51527781	51528383	+	0	NA	intron (NR_132764, intron 2 of 12)	intron (NR_132764, intron 2 of 12)	25839	NM_008904	19017	Mm.259072	NM_008904	ENSMUSG00000029167	Ppargc1a	A830037N07Rik|ENSMUSG00000079510|Gm11133|PGC-1|PPARGC-1-alpha|Pgc-1alpha|Pgc1|Pgco1|Ppargc1	peroxisome proliferative activated receptor, gamma, coactivator 1 alpha	protein-coding
upeaks-45409	chr9	57203674	57203953	+	0	NA	Intergenic	RLTR1F_Mm|LTR|ERVK	28538	NR_033784	67319	Mm.234187	NR_033784	ENSMUSG00000100282	1700041C23Rik	-	RIKEN cDNA 1700041C23 gene	ncRNA
upeaks-35656	chr5	134779131	134779590	+	0	NA	Intergenic	Intergenic	-32037	NM_007925	13717	Mm.275320	NM_007925	ENSMUSG00000029675	Eln	AI385707|AI480567|E030024M20Rik	elastin	protein-coding
upeaks-5675	chr10	126019423	126020113	+	0	NA	Intergenic	Intergenic	53549	NM_177152	320398	Mm.275586	NM_177152	ENSMUSG00000020105	Lrig3	9030421L11Rik|9130004I02Rik|9430095K15Rik|mKIAA3016	leucine-rich repeats and immunoglobulin-like domains 3	protein-coding
upeaks-48147	chrY	1245643	1245955	+	0	NA	promoter-TSS (NM_001326682)	promoter-TSS (NM_001326682)	-40	NM_001326683	22290	Mm.20477	NM_009484	ENSMUSG00000068457	Uty	Hydb|mKIAA4057	ubiquitously transcribed tetratricopeptide repeat gene, Y chromosome	protein-coding
upeaks-5873	chr11	3398400	3398704	+	0	NA	intron (NM_010718, intron 1 of 15)	intron (NM_010718, intron 1 of 15)	10686	NM_010718	16886	Mm.124176	NM_010718	ENSMUSG00000020451	Limk2	Limk-2|whe	LIM motif-containing protein kinase 2	protein-coding
upeaks-1166	chr1	83350933	83351161	+	0	NA	intron (NM_172430, intron 2 of 10)	intron (NM_172430, intron 2 of 10)	57153	NM_172430	77629	Mm.154303	NM_172430	ENSMUSG00000026163	Sphkap	4930544G21Rik|A930009L15Rik|AI852220|SKIP|mKIAA1678	SPHK1 interactor, AKAP domain containing	protein-coding
upeaks-22509	chr19	9941022	9941336	+	0	NA	Intergenic	Intergenic	-39421	NR_073181	14319	Mm.1776	NM_010239	ENSMUSG00000024661	Fth1	FHC|Fth|HFt|MFH	ferritin heavy polypeptide 1	protein-coding
upeaks-29926	chr3	145285206	145285407	+	0	NA	Intergenic	Intergenic	-7166	NM_027770	71355	Mm.235570	NM_027770	ENSMUSG00000028197	Col24a1	5430404K19Rik	collagen, type XXIV, alpha 1	protein-coding
upeaks-27695	chr3	20145613	20146053	+	0	NA	intron (NM_013755, intron 4 of 6)	intron (NM_013755, intron 4 of 6)	9283	NM_013755	27357	Mm.6375	NM_013755	ENSMUSG00000019528	Gyg	AU017667|Gyg1	glycogenin	protein-coding
upeaks-25091	chr2	76419725	76420000	+	0	NA	intron (NM_001290733, intron 1 of 26)	intron (NM_001290733, intron 1 of 26)	13354	NM_001290733	99031	Mm.240435	NM_145525	ENSMUSG00000042359	Osbpl6	1110062M20Rik|AI596402|ORP-6|mKIAA4128	oxysterol binding protein-like 6	protein-coding
upeaks-8758	chr11	113903018	113903408	+	0	NA	intron (NM_172800, intron 2 of 44)	intron (NM_172800, intron 2 of 44)	-151398	NM_001163346	56699	Mm.293378	NM_020006	ENSMUSG00000041598	Cdc42ep4	1500041M20Rik|Borg4|CEP4	CDC42 effector protein (Rho GTPase binding) 4	protein-coding
upeaks-16528	chr15	83683080	83683279	+	0	NA	intron (NM_022723, intron 3 of 21)	intron (NM_022723, intron 3 of 21)	41860	NM_022723	64706	Mm.40393	NM_022723	ENSMUSG00000016763	Scube1	7330410C13Rik|A630023E24Rik	signal peptide, CUB domain, EGF-like 1	protein-coding
upeaks-46620	chr9	108385069	108385352	+	0	NA	intron (NM_001311157, intron 18 of 20)	intron (NM_001311157, intron 18 of 20)	-7624	NM_053216	112418	Mm.78287	NM_053216	ENSMUSG00000032611	1700102P08Rik	AI593206	RIKEN cDNA 1700102P08 gene	protein-coding
upeaks-31259	chr4	83976105	83976461	+	0	NA	Intergenic	Intergenic	68596	NR_130998	78238	Mm.243903	NR_130998	ENSMUSG00000085217	6030471H07Rik	-	RIKEN cDNA 6030471H07 gene	ncRNA
upeaks-17551	chr16	22374008	22374377	+	0	NA	Intergenic	Intergenic	65378	NM_023794	104156	Mm.155708	NM_023794	ENSMUSG00000013089	Etv5	1110005E01Rik|8430401F14Rik|ERM	ets variant 5	protein-coding
upeaks-8073	chr11	96363807	96364245	+	0	NA	Intergenic	Intergenic	-1732	NM_008266	15407	Mm.890	NM_008266	ENSMUSG00000018973	Hoxb1	Hox-2.9	homeobox B1	protein-coding
upeaks-2324	chr1	160311809	160312153	+	0	NA	intron (NM_001038621, intron 2 of 8)	intron (NM_001038621, intron 2 of 8)	-16009	NR_035448	100316784		NR_035448	ENSMUSG00000089204	Mir1927	mmu-mir-1927	microRNA 1927	ncRNA
upeaks-8897	chr11	116431247	116431662	+	0	NA	Intergenic	Intergenic	-2640	NM_176902	319370	Mm.258466	NM_176902	ENSMUSG00000050628	Ubald2	1110014K08Rik|D030012E24Rik|Fam100b	UBA-like domain containing 2	protein-coding
upeaks-2586	chr1	170889353	170889689	+	0	NA	Intergenic	Intergenic	-3981	NM_023173	80915	Mm.34365	NM_023173	ENSMUSG00000026659	Dusp12	1190004O14Rik|AA027408|AW049275|ENSMUSG00000045460|ESTM36|LMW-DSP4|T-DSP4|VH1|mVH1	dual specificity phosphatase 12	protein-coding
upeaks-6355	chr11	30177165	30177469	+	0	NA	intron (NM_175836, intron 1 of 34)	intron (NM_175836, intron 1 of 34)	20940	NM_009260	20742	Mm.123110	NM_009260	ENSMUSG00000020315	Sptbn1	9930031C03Rik|AL033301|SPTB2|Spnb-2|Spnb2|elf1|elf3|mKIAA4049	spectrin beta, non-erythrocytic 1	protein-coding
upeaks-869	chr1	68424397	68424745	+	0	NA	intron (NM_010154, intron 3 of 26)	AmnSINE1|SINE|Deu	683488	NM_010154	13869	Mm.442420	NM_010154	ENSMUSG00000062209	Erbb4	Her4|c-erbB-4	erb-b2 receptor tyrosine kinase 4	protein-coding
upeaks-45362	chr9	55215069	55215343	+	0	NA	intron (NM_028049, intron 4 of 6)	intron (NM_028049, intron 4 of 6)	6271	NM_028049	71999	Mm.276429	NM_028049	ENSMUSG00000032309	Fbxo22	0610033L19Rik|1600016C16Rik	F-box protein 22	protein-coding
upeaks-27186	chr2	168980865	168981362	+	0	NA	Intergenic	Intergenic	2844	NR_040326	75508	Mm.271256	NR_040326	ENSMUSG00000086348	1700017J07Rik	-	RIKEN cDNA 1700017J07 gene	ncRNA
upeaks-22022	chr18	78103555	78103894	+	0	NA	intron (NM_001171010, intron 9 of 9)	intron (NM_001171010, intron 9 of 9)	19702	NM_028122	108052	Mm.33832	NM_028122	ENSMUSG00000059336	Slc14a1	2610507K20Rik|3021401A05Rik|UT-B|Utb1	solute carrier family 14 (urea transporter), member 1	protein-coding
upeaks-31788	chr4	113263743	113264229	+	0	NA	intron (NM_001103199, intron 2 of 48)	RLTR1D|LTR|ERV1	22987	NM_001103199	230622	Mm.291107	NM_001103199	ENSMUSG00000087194	Skint6	OTTMUSG00000008519	selection and upkeep of intraepithelial T cells 6	protein-coding
upeaks-46264	chr9	95052124	95052431	+	0	NA	intron (NM_177909, intron 11 of 15)	intron (NM_177909, intron 11 of 15)	300448	NR_106116	102465763		NR_106116	ENSMUSG00000098251	Mir7656	Gm27614|mmu-mir-7656	microRNA 7656	ncRNA
upeaks-1741	chr1	130474303	130474577	+	0	NA	Intergenic	Intergenic	-11696	NM_010016	13136	Mm.101591	NM_010016	ENSMUSG00000026399	Cd55	Daf|Daf-GPI|Daf1|GPI-DAF	CD55 molecule, decay accelerating factor for complement	protein-coding
upeaks-10747	chr12	105757835	105758407	+	0	NA	intron (NM_030187, intron 12 of 17)	intron (NM_030187, intron 12 of 17)	-26576	NM_001347440	18789	Mm.255877	NM_011112	ENSMUSG00000021111	Papola	Pap|PapIII|Plap	poly (A) polymerase alpha	protein-coding
upeaks-4561	chr10	78326174	78326645	+	0	NA	intron (NM_053014, intron 2 of 9)	intron (NM_053014, intron 2 of 9)	13798	NR_106119	102465765		NR_106119	ENSMUSG00000098885	Mir7659	Gm27433|mmu-mir-7659	microRNA 7659	ncRNA
upeaks-43522	chr8	95042406	95042875	+	0	NA	intron (NM_173036, intron 11 of 11)	MLTR73|LTR|ERV1	-12463	NM_001042715	330830	Mm.277112	NM_001042715	ENSMUSG00000031786	Drc7	Ccdc135|Gm770|SRG-L|SRG-S	dynein regulatory complex subunit 7	protein-coding
upeaks-11297	chr13	18497661	18497886	+	0	NA	Intergenic	Intergenic	-115734	NM_175006	218030	Mm.352263	NM_175006	ENSMUSG00000009734	Pou6f2	D130006K24Rik|RPF-1	POU domain, class 6, transcription factor 2	protein-coding
upeaks-21963	chr18	75499308	75499527	+	0	NA	intron (NM_201354, intron 9 of 11)	intron (NM_201354, intron 9 of 11)	-15228	NR_045879	100038353	Mm.440724	NR_045879	ENSMUSG00000097712	Gm10532	ENSMUSG00000073534	predicted gene 10532	ncRNA
upeaks-959	chr1	73363517	73364143	+	0	NA	Intergenic	Intergenic	-35138	NR_040605	78718	Mm.244075	NR_040605	ENSMUSG00000101812	D530049I02Rik	-	RIKEN cDNA D530049I02 gene	ncRNA
upeaks-6088	chr11	12205518	12206016	+	0	NA	Intergenic	Intergenic	-168347	NM_010345	14783	Mm.273117	NM_010345	ENSMUSG00000020176	Grb10	5730571D09Rik|AI325020|Meg1|mKIAA0207	growth factor receptor bound protein 10	protein-coding
upeaks-41601	chr7	137698540	137698939	+	0	NA	Intergenic	RLTR1E_MM|LTR|ERV1	261065	NR_033611	620016	Mm.388932	NR_033611	ENSMUSG00000100863	Gm12669	OTTMUSG00000007920	glutaredoxin 3 pseudogene	pseudo
upeaks-3609	chr10	24150108	24150357	+	0	NA	intron (NM_016797, intron 1 of 9)	intron (NM_016797, intron 1 of 9)	915	NM_016797	53331	Mm.248042	NM_016797	ENSMUSG00000019998	Stx7	AI315064|AI317144|AW107239|Syn7	syntaxin 7	protein-coding
upeaks-30640	chr4	40868989	40869259	+	0	NA	Intergenic	Intergenic	-14587	NM_022305	14595	Mm.15622	NM_022305	ENSMUSG00000028413	B4galt1	B-1,4-GalT|B-1,4-GalT1|GalT|Ggtb|Ggtb2|b4Gal-T1|beta-1,4-GalT|beta-1,4-GalT1|beta4Gal-T1	UDP-Gal:betaGlcNAc beta 1,4- galactosyltransferase, polypeptide 1	protein-coding
upeaks-18233	chr16	68204850	68205250	+	0	NA	Intergenic	RLTR1B|LTR|ERV1	-584142	NM_001347247	239857	Mm.394300	NM_178721	ENSMUSG00000064115	Cadm2	2900078E11Rik|9330131D06|A830029E02Rik|Igdf4d|Igsf4d|NECL3|SynCAM 2|SynCAM2	cell adhesion molecule 2	protein-coding
upeaks-11342	chr13	21195385	21195763	+	0	NA	TTS (NM_009054)	TTS (NM_009054)	15643	NM_009054	19720	Mm.314056	NM_009054	ENSMUSG00000021326	Trim27	AW538890|Gm19403|Rfp	tripartite motif-containing 27	protein-coding
upeaks-31432	chr4	95821965	95822288	+	0	NA	TTS (NM_029347)	TTS (NM_029347)	144909	NR_045777	319247	Mm.473527	NM_175680	ENSMUSG00000044125	9530080O11Rik	-	RIKEN cDNA 9530080O11 gene	ncRNA
upeaks-20132	chr17	66256435	66256703	+	0	NA	Intergenic	Intergenic	133049	NM_001003919	320209	Mm.259605	NM_001003919	ENSMUSG00000035842	Ddx11	4732462I11Rik|CHL1|CHLR1|KRG2|essa15a	DEAD/H (Asp-Glu-Ala-Asp/His) box helicase 11	protein-coding
upeaks-2815	chr1	180277712	180277911	+	0	NA	Intergenic	Intergenic	-21511	NM_001128605	19165	Mm.330850	NM_011183	ENSMUSG00000010609	Psen2	ALG-3|Ad4h|Alg3|PS-2|PS2|Psnl2|STM2	presenilin 2	protein-coding
upeaks-20471	chr17	83238515	83238714	+	0	NA	Intergenic	Intergenic	23331	NM_134117	106522	Mm.311974	NM_134117	ENSMUSG00000024247	Pkdcc	AI115348|AW548124|Adtk1|ESTM17|MAd1|Sgk493|Vlk|X83346	protein kinase domain containing, cytoplasmic	protein-coding
upeaks-31533	chr4	101400113	101400509	+	0	NA	Intergenic	Intergenic	-18978	NM_001177602	11639	Mm.42040	NM_009647	ENSMUSG00000028527	Ak4	AK 4|Ak-3|Ak-4|Ak3|Ak3l1|D4Ertd274e	adenylate kinase 4	protein-coding
upeaks-5002	chr10	93517761	93518122	+	0	NA	Intergenic	Intergenic	22092	NM_027908	71761	Mm.244518	NM_027908	ENSMUSG00000015890	Amdhd1	1300019J08Rik	amidohydrolase domain containing 1	protein-coding
upeaks-4342	chr10	68268728	68268958	+	0	NA	intron (NM_023598, intron 2 of 9)	intron (NM_023598, intron 2 of 9)	9883	NM_023598	71371	Mm.440357	NM_023598	ENSMUSG00000019947	Arid5b	4930580B11|5430435G07Rik|AI467247|Desrt|Mrf2|Mrf2alpha|Mrf2beta	AT rich interactive domain 5B (MRF1-like)	protein-coding
upeaks-9407	chr12	20311913	20312686	+	0	NA	Intergenic	CpG	503480	NR_015521	69513	Mm.273972	NR_015521	ENSMUSG00000099759	1700030C10Rik	-	RIKEN cDNA 1700030C10 gene	ncRNA
upeaks-36651	chr6	31602899	31603228	+	0	NA	Intergenic	Intergenic	-39126	NM_013723	27205	Mm.89918	NM_013723	ENSMUSG00000025608	Podxl	AW121214|Ly102|PC|PCLP-1|Pclp1	podocalyxin-like	protein-coding
upeaks-14770	chr14	86487511	86487947	+	0	NA	Intergenic	Intergenic	241759	NR_040457	75155	Mm.399239	NR_040457		4930529K09Rik	4930507G21Rik	RIKEN cDNA 4930529K09 gene	ncRNA
upeaks-32010	chr4	120259621	120259841	+	0	NA	Intergenic	Intergenic	27530	NM_194060	329934	Mm.277090	NM_194060	ENSMUSG00000052135	Foxo6	-	forkhead box O6	protein-coding
upeaks-8288	chr11	100725121	100725515	+	0	NA	intron (NM_024456, intron 1 of 5)	intron (NM_024456, intron 1 of 5)	11468	NM_029307	75482	Mm.46175	NM_029307	ENSMUSG00000017832	Hspb9	1700007H20Rik	heat shock protein, alpha-crystallin-related, B9	protein-coding
upeaks-8931	chr11	117056933	117057225	+	0	NA	Intergenic	Intergenic	-19704	NR_027059	76972	Mm.309167	NR_027059	ENSMUSG00000086859	Snhg20	2810008D09Rik	small nucleolar RNA host gene 20	ncRNA
upeaks-29849	chr3	142348847	142349662	+	0	NA	intron (NM_022554, intron 2 of 8)	intron (NM_022554, intron 2 of 8)	42596	NM_001190857	56376	Mm.117709	NM_019808	ENSMUSG00000028273	Pdlim5	1110001A05Rik|AI987914|C87059|Enh|Enh1|Enh2|Enh3|LIM	PDZ and LIM domain 5	protein-coding
upeaks-23009	chr19	38026337	38026661	+	0	NA	intron (NM_001302140, intron 1 of 53)	intron (NM_001302140, intron 1 of 53)	17078	NM_001099634	226101	Mm.34674	NM_177035	ENSMUSG00000048612	Myof	2310004N10Rik|2310051D19Rik|E030042N20Rik|Fer1l3	myoferlin	protein-coding
upeaks-2327	chr1	160624817	160625026	+	0	NA	intron (NM_013862, intron 13 of 20)	RLTR13E|LTR|ERVK	-47168	NM_001146330	620246	Mm.478780	NM_001146330		Gpr52	EG620246	G protein-coupled receptor 52	protein-coding
upeaks-16997	chr15	100679071	100679336	+	0	NA	intron (NM_033612, intron 6 of 7)	intron (NM_033612, intron 6 of 7)	8717	NM_033612	109901	Mm.2131	NM_033612	ENSMUSG00000023031	Cela1	1810009A17Rik|1810062B19Rik|Ela-1|Ela1|PC-TsF	chymotrypsin-like elastase family, member 1	protein-coding
upeaks-18378	chr16	85528231	85528702	+	0	NA	intron (NM_144853, intron 2 of 3)	intron (NM_144853, intron 2 of 3)	21907	NM_144853	224405	Mm.213203	NM_144853	ENSMUSG00000041134	Cyyr1	-	cysteine and tyrosine-rich protein 1	protein-coding
upeaks-34034	chr5	47780501	47780719	+	0	NA	Intergenic	Intergenic	-202545	NR_111900	20563	Mm.289739	NM_178804	ENSMUSG00000031558	Slit2	Drad-1|E030015M03Rik|E130320P19Rik|Slil3|mKIAA4141|slit-2	slit homolog 2 (Drosophila)	protein-coding
upeaks-5447	chr10	117471826	117472074	+	0	NA	Intergenic	RMER5|LTR|ERV1	-94977	NM_001013391	432508	Mm.478881	NM_001013391	ENSMUSG00000055531	Cpsf6	4733401N12Rik|AI256641|CFIM|CFIM68|HPBRII-4|HPBRII-7	cleavage and polyadenylation specific factor 6	protein-coding
upeaks-18960	chr17	14540147	14540931	+	0	NA	Intergenic	Intergenic	-141597	NR_027986	74917	Mm.32228	NM_183107		4930474M22Rik	-	RIKEN cDNA 4930474M22 gene	ncRNA
upeaks-41213	chr7	122203998	122204210	+	0	NA	Intergenic	MER58B|DNA|hAT-Charlie	-15392	NM_027363	70261	Mm.96997	NM_027363	ENSMUSG00000030865	Chp2	2010110P09Rik|Cbhp2	calcineurin-like EF hand protein 2	protein-coding
upeaks-23363	chr19	53016106	53016305	+	0	NA	intron (NM_133216, intron 3 of 20)	PB1D10|SINE|Alu	-5449	NR_105834	102465220		NR_105834	ENSMUSG00000098730	Mir6407	Gm27832|mmu-mir-6407	microRNA 6407	ncRNA
upeaks-32797	chr4	141578879	141579193	+	0	NA	intron (NM_001163256, intron 8 of 8)	intron (NM_001163256, intron 8 of 8)	20888	NM_001163256	74202	Mm.490327	NM_133754	ENSMUSG00000006219	Fblim1	2410043F08Rik|Cal|Fblp1|Gt10|migfilin|migfilin(s)	filamin binding LIM protein 1	protein-coding
upeaks-21767	chr18	66303272	66303555	+	0	NA	Intergenic	Lx8b|LINE|L1	-11575	NM_178793	320924	Mm.442049	NM_178793	ENSMUSG00000046318	Ccbe1	4933426F18Rik|9430093N24Rik|mKIAA1983	collagen and calcium binding EGF domains 1	protein-coding
upeaks-28745	chr3	92900194	92900442	+	0	NA	Intergenic	Intergenic	25912	NM_001039594	545548	Mm.387664	NM_001039594	ENSMUSG00000054325	Lce3a	EG545548	late cornified envelope 3A	protein-coding
upeaks-15850	chr15	55440824	55441161	+	0	NA	intron (NM_181277, intron 24 of 47)	intron (NM_181277, intron 24 of 47)	116320	NM_026759	68537	Mm.236795	NM_026759	ENSMUSG00000022370	Mrpl13	1110002D09Rik	mitochondrial ribosomal protein L13	protein-coding
upeaks-33408	chr5	9047279	9047598	+	0	NA	Intergenic	Intergenic	-50292	NM_023733	74114	Mm.28197	NM_023733	ENSMUSG00000003623	Crot	1200003H03Rik	carnitine O-octanoyltransferase	protein-coding
upeaks-22132	chr18	83065277	83065525	+	0	NA	Intergenic	Intergenic	-144841	NR_033307	75853	Mm.420737	NR_033307		4930592I03Rik	-	RIKEN cDNA 4930592I03 gene	ncRNA
upeaks-3440	chr10	14055702	14056048	+	0	NA	intron (NM_010437, intron 1 of 8)	intron (NM_010437, intron 1 of 8)	89496	NM_010437	15273	Mm.42157	NM_010437	ENSMUSG00000015501	Hivep2	Gm20114|MIBP1|Schnurri-2|Shn-2	human immunodeficiency virus type I enhancer binding protein 2	protein-coding
upeaks-28036	chr3	50386633	50386919	+	0	NA	intron (NM_011990, intron 6 of 11)	intron (NM_011990, intron 6 of 11)	56837	NM_011990	26570	Mm.260988	NM_011990	ENSMUSG00000027737	Slc7a11	9930009M05Rik|AI451155|sut|xCT	solute carrier family 7 (cationic amino acid transporter, y+ system), member 11	protein-coding
upeaks-23769	chr2	12190802	12191357	+	0	NA	intron (NR_138462, intron 20 of 30)	intron (NR_138462, intron 20 of 30)	-110167	NR_040353	338535	Mm.483275	NR_040353	ENSMUSG00000086843	E030013I19Rik	-	RIKEN cDNA E030013I19 gene	ncRNA
upeaks-15096	chr14	118796291	118796521	+	0	NA	intron (NM_001160097, intron 1 of 3)	intron (NM_001160097, intron 1 of 3)	8535	NM_023878	58187	Mm.390755	NM_021386	ENSMUSG00000022132	Cldn10	6720456I16Rik|Cldn10a|Cldn10b|D14Ertd728e	claudin 10	protein-coding
upeaks-1942	chr1	135821090	135821317	+	0	NA	intron (NM_133664, intron 1 of 9)	intron (NM_133664, intron 1 of 9)	2605	NM_133664	16763	Mm.36726	NM_133664	ENSMUSG00000041782	Lad1	-	ladinin	protein-coding
upeaks-6005	chr11	7178814	7179021	+	0	NA	TTS (NM_009622)	TTS (NM_009622)	9652	NR_045101	100041347	Mm.300962	NR_045101	ENSMUSG00000087512	Gm11985	OTTMUSG00000005133	predicted gene 11985	ncRNA
upeaks-43581	chr8	102554335	102554565	+	0	NA	Intergenic	Intergenic	230661	NM_009866	12552	Mm.1571	NM_009866	ENSMUSG00000031673	Cdh11	Cad11|OSF-4	cadherin 11	protein-coding
upeaks-14285	chr14	58937367	58937566	+	0	NA	Intergenic	Intergenic	205427	NM_026461	67932	Mm.65550	NM_026461	ENSMUSG00000021977	1700129C05Rik	-	RIKEN cDNA 1700129C05 gene	protein-coding
upeaks-11681	chr13	34726195	34726529	+	0	NA	Intergenic	Intergenic	-13280	NM_138746	108161	Mm.41991	NM_138746	ENSMUSG00000038246	Fam50b	D0H6S2654E|X5L|XAP-5-like	family with sequence similarity 50, member B	protein-coding
upeaks-15469	chr15	26795459	26795839	+	0	NA	intron (NM_176959, intron 1 of 3)	intron (NM_176959, intron 1 of 3)	99915	NM_176959	448987	Mm.253378	NM_176959	ENSMUSG00000043556	Fbxl7	AL023057|D230018M15Rik|FBL7|Fbl6	F-box and leucine-rich repeat protein 7	protein-coding
upeaks-22801	chr19	28182509	28182817	+	0	NA	Intergenic	Intergenic	-171497	NM_011265	19726	Mm.313321	NM_011265	ENSMUSG00000040929	Rfx3	C230093O12Rik|MRFX3	regulatory factor X, 3 (influences HLA class II expression)	protein-coding
upeaks-14088	chr14	51096114	51096451	+	0	NA	5' UTR (NM_201239, exon 1 of 2)	5' UTR (NM_201239, exon 1 of 2)	282	NM_007447	11727	Mm.202665	NM_007447	ENSMUSG00000072115	Ang	AI385586|Ang1|Rnase5|Rnase5a	angiogenin, ribonuclease, RNase A family, 5	protein-coding
upeaks-40380	chr7	81372430	81372693	+	0	NA	intron (NM_001252525, intron 2 of 11)	intron (NM_001252525, intron 2 of 11)	-27327	NM_009092	20068	Mm.42767	NM_009092	ENSMUSG00000061787	Rps17	-	ribosomal protein S17	protein-coding
upeaks-29200	chr3	107977699	107978086	+	0	NA	Intergenic	Intergenic	8544	NM_008183	14863	Mm.440086	NM_008183	ENSMUSG00000040562	Gstm2	Gstb-2|Gstb2	glutathione S-transferase, mu 2	protein-coding
upeaks-18069	chr16	50380243	50380558	+	0	NA	intron (NM_001347240, intron 2 of 16)	intron (NM_001347240, intron 2 of 16)	51989	NM_027444	70508	Mm.28940	NM_027444	ENSMUSG00000022641	Bbx	5530401J07Rik|5730403O13Rik	bobby sox HMG box containing	protein-coding
upeaks-3617	chr10	24493883	24494291	+	0	NA	Intergenic	Intergenic	-101355	NM_010217	14219	Mm.390287	NM_010217	ENSMUSG00000019997	Ctgf	Ccn2|Fisp12|Hcs24|fisp-12	connective tissue growth factor	protein-coding
upeaks-9140	chr11	121963209	121963571	+	0	NA	Intergenic	RLTR1D|LTR|ERV1	133172	NM_029049	74675	Mm.61213	NM_029049	ENSMUSG00000039198	Ptchd3	4930451E13Rik|4933440L20Rik|RNDEu-3	patched domain containing 3	protein-coding
upeaks-7762	chr11	85695605	85695921	+	0	NA	intron (NM_138681, intron 24 of 25)	intron (NM_138681, intron 24 of 25)	23981	NR_045875	71489	Mm.442482	NR_045875	ENSMUSG00000086199	Bcas3os1	8430403D17Rik	breast carcinoma amplified sequence 3, opposite strand 1	ncRNA
upeaks-29281	chr3	114790063	114790329	+	0	NA	Intergenic	Intergenic	-73057	NR_030469	735255		NR_030469	ENSMUSG00000076126	Mir669b	Mirn669b	microRNA 669b	ncRNA
upeaks-22768	chr19	25654429	25654661	+	0	NA	Intergenic	Intergenic	17694	NR_045347	100503074	Mm.140012	NR_045347	ENSMUSG00000101089	2610016A17Rik	2610317C19Rik	RIKEN cDNA 2610016A17 gene	ncRNA
upeaks-42410	chr8	33987213	33987412	+	0	NA	Intergenic	Intergenic	-57449	NM_001042674	19663	Mm.323997	NM_019733	ENSMUSG00000031586	Rbpms	2010300K22Rik|2700019M19Rik|AU017537|RBP-MS|hermes	RNA binding protein gene with multiple splicing	protein-coding
upeaks-5573	chr10	121454749	121455550	+	0	NA	intron (NM_138956, intron 1 of 4)	intron (NM_138956, intron 1 of 4)	21101	NM_138956	192678	Mm.41265	NM_138956	ENSMUSG00000025795	Rassf3	AW212023|AW322379	Ras association (RalGDS/AF-6) domain family member 3	protein-coding
upeaks-36942	chr6	48665982	48666567	+	0	NA	Intergenic	Intergenic	-9861	NM_174960	317758	Mm.116971	NM_174960	ENSMUSG00000051124	Gimap9	A630002K24|BB145400	GTPase, IMAP family member 9	protein-coding
upeaks-44386	chr8	127440719	127441440	+	0	NA	intron (NM_001309391, intron 20 of 24)	ID_B1|SINE|B4	141427	NM_001013580	93742	Mm.299254	NM_033620	ENSMUSG00000025812	Pard3	AA960621|AI256638|Asip|D8Ertd580e|Par-3|Par3|Pard-3|Pard3a|Phip	par-3 family cell polarity regulator	protein-coding
upeaks-43608	chr8	104095664	104095977	+	0	NA	intron (NR_131138, intron 1 of 2)	intron (NR_131138, intron 1 of 2)	-5805	NM_009868	12562	Mm.21767	NM_009868	ENSMUSG00000031871	Cdh5	7B4|AA408225|Cd144|VE-Cad|VECD|VEcad|Vec	cadherin 5	protein-coding
upeaks-31039	chr4	62434396	62434775	+	0	NA	5' UTR (NM_153504, exon 1 of 3)	5' UTR (NM_153504, exon 1 of 3)	141	NM_153504	76072	Mm.169565	NM_153504	ENSMUSG00000063851	Rnf183	5830442J12Rik	ring finger protein 183	protein-coding
upeaks-7942	chr11	91204606	91204805	+	0	NA	Intergenic	RLTR26C_MM|LTR|ERVK	372850	NM_028547	73470	Mm.67677	NM_028547	ENSMUSG00000046755	Kif2b	1700063D03Rik	kinesin family member 2B	protein-coding
upeaks-41233	chr7	123336176	123336683	+	0	NA	intron (NM_001122641, intron 1 of 18)	intron (NM_001122641, intron 1 of 18)	33486	NM_001122640	70497	Mm.403318	NM_144529	ENSMUSG00000030766	Arhgap17	5730403H17Rik|Nadrin|Nadrin2|Rich1|Wbp15	Rho GTPase activating protein 17	protein-coding
upeaks-34502	chr5	88593853	88594106	+	0	NA	intron (NM_027530, intron 1 of 12)	intron (NM_027530, intron 1 of 12)	10466	NM_001289776	52822	Mm.270469	NM_027530	ENSMUSG00000029291	Rufy3	2810428M05Rik|6330416M07Rik|AW455998|AW538594|D5Bwg0860e|Ripx|Rpipx	RUN and FYVE domain containing 3	protein-coding
upeaks-47192	chrX	10502719	10502922	+	0	NA	intron (NM_019634, intron 1 of 7)	intron (NM_019634, intron 1 of 7)	17704	NM_019634	21912	Mm.18590	NM_019634	ENSMUSG00000058254	Tspan7	1200014P11Rik|A15|AI323365|Cd231|Mxs1|PE31|R74651|TALLA|Tm4sf2	tetraspanin 7	protein-coding
upeaks-21887	chr18	73546313	73546617	+	0	NA	Intergenic	RMER15|LTR|ERVL	-26240	NM_001039214	240396	Mm.24131	NM_001039214	ENSMUSG00000037253	Mex3c	A130001D14Rik|BC035207|BM-013|Rkhd2	mex3 RNA binding family member C	protein-coding
upeaks-43946	chr8	115754725	115755096	+	0	NA	Intergenic	Intergenic	-48016	NM_001025577	17132	Mm.275549	NM_001025577	ENSMUSG00000055435	Maf	2810401A20Rik|A230108G15Rik|AW047063|c-maf	avian musculoaponeurotic fibrosarcoma oncogene homolog	protein-coding
upeaks-24632	chr2	51137596	51138091	+	0	NA	intron (NM_028810, intron 2 of 4)	intron (NM_028810, intron 2 of 4)	11268	NM_028810	74194	Mm.46497	NM_028810	ENSMUSG00000017144	Rnd3	2610017M01Rik|AI661404|Arhe|Rhoe	Rho family GTPase 3	protein-coding
upeaks-4969	chr10	91300054	91300467	+	0	NA	Intergenic	MER89|LTR|ERV1	-128641	NM_001080131	21917	Mm.159684	NM_011605	ENSMUSG00000019961	Tmpo	5630400D24Rik|AI195756|AI606875|AW214352|AW547477|LAP2|TP	thymopoietin	protein-coding
upeaks-14967	chr14	105427480	105428136	+	0	NA	intron (NR_045859, intron 1 of 2)	intron (NR_045859, intron 1 of 2)	249	NR_045859	71362	Mm.410781	NR_045859		5430440P10Rik	-	RIKEN cDNA 5430440P10 gene	ncRNA
upeaks-39886	chr7	45957349	45957571	+	0	NA	Intergenic	PB1|SINE|Alu	29062	NM_001033243	211535	Mm.227539	NM_001033243	ENSMUSG00000040189	Ccdc114	-	coiled-coil domain containing 114	protein-coding
upeaks-30647	chr4	41096094	41096557	+	0	NA	intron (NM_016689, intron 1 of 5)	intron (NM_016689, intron 1 of 5)	1858	NM_016689	11828	Mm.34043	NM_016689	ENSMUSG00000028435	Aqp3	AQP-2	aquaporin 3	protein-coding
upeaks-46306	chr9	96650007	96650267	+	0	NA	Intergenic	Intergenic	-18634	NM_053268	114713	Mm.124502	NM_053268	ENSMUSG00000032413	Rasa2	5430433H21Rik|AA517451|AU023900|GAP1m	RAS p21 protein activator 2	protein-coding
upeaks-32623	chr4	137097646	137098056	+	0	NA	Intergenic	Intergenic	-49156	NM_198248	230848	Mm.31068	NM_198248	ENSMUSG00000060862	Zbtb40	BC059177|C230087D24|Gm571|mKIAA0478	zinc finger and BTB domain containing 40	protein-coding
upeaks-38967	chr7	4119590	4119793	+	0	NA	exon (NM_001109765, exon 1 of 14)	exon (NM_001109765, exon 1 of 14)	161	NM_001001454	57776	Mm.29729	NM_021324	ENSMUSG00000030428	Ttyh1	4930459B04Rik|6330408P11Rik|TTY1|mTTY1|tty	tweety family member 1	protein-coding
upeaks-33882	chr5	36829166	36829491	+	0	NA	intron (NM_008550, intron 2 of 18)	intron (NM_008550, intron 2 of 18)	1321	NM_008550	17160	Mm.761	NM_008550	ENSMUSG00000029119	Man2b2	mKIAA0935	mannosidase 2, alpha B2	protein-coding
upeaks-20585	chr17	86769943	86770165	+	0	NA	intron (NM_010137, intron 1 of 15)	intron (NM_010137, intron 1 of 15)	16190	NM_010137	13819	Mm.1415	NM_010137	ENSMUSG00000024140	Epas1	HIF-2alpha|HIF2A|HLF|HRF|MOP2|bHLHe73	endothelial PAS domain protein 1	protein-coding
upeaks-38976	chr7	4260665	4261136	+	0	NA	Intergenic	RLTR13F|LTR|ERVK	-13243	NM_011093	18729	Mm.326531	NM_008848		Pira6	12M1|Pira10|p91B	paired-Ig-like receptor A6	protein-coding
upeaks-29094	chr3	104420987	104421320	+	0	NA	Intergenic	Intergenic	90765	NM_001310698	269473	Mm.34855	NM_001025067	ENSMUSG00000032913	Lrig2	4632419I10Rik|BB096938|LIG-2	leucine-rich repeats and immunoglobulin-like domains 2	protein-coding
upeaks-35257	chr5	119706533	119707009	+	0	NA	Intergenic	Intergenic	-15553	NR_040416	433944	Mm.491053	NR_040416	ENSMUSG00000086847	Tbx3os2	Gm16065|OTTMUSG00000029666	T-box 3, opposite strand 2	ncRNA
upeaks-30418	chr4	13907283	13907482	+	0	NA	Intergenic	MTE2a|LTR|ERVL-MaLR	122600	NM_009822	12395	Mm.4909	NM_009822	ENSMUSG00000006586	Runx1t1	Cbfa2t1h|ETO|MTG8	runt-related transcription factor 1; translocated to, 1 (cyclin D-related)	protein-coding
upeaks-36356	chr6	7848228	7848470	+	0	NA	intron (NM_052993, intron 1 of 3)	intron (NM_052993, intron 1 of 3)	3125	NM_052993	94192	Mm.102752	NM_052993	ENSMUSG00000042460	C1galt1	2210410E06Rik|AV284120|T-synthase	core 1 synthase, glycoprotein-N-acetylgalactosamine 3-beta-galactosyltransferase, 1	protein-coding
upeaks-37341	chr6	72620026	72620434	+	0	NA	Intergenic	L2|LINE|L2	-3230	NM_009443	22134	Mm.246563	NM_009443	ENSMUSG00000056429	Tgoln1	AU015504|D6Ertd384e|TGN38|TGN38A|Ttgn1	trans-golgi network protein	protein-coding
upeaks-22998	chr19	37858487	37858740	+	0	NA	Intergenic	Intergenic	160805	NM_007811	13082	Mm.42230	NM_007811	ENSMUSG00000024987	Cyp26a1	Cyp26|P450RA|P450RAI|RAH	cytochrome P450, family 26, subfamily a, polypeptide 1	protein-coding
upeaks-39422	chr7	27798412	27798700	+	0	NA	Intergenic	RMER17C|LTR|ERVK	-8640	NM_027703	71163	Mm.440493	NM_027703	ENSMUSG00000030604	Zfp626	4833408D11Rik|4933426I21Rik|7630402I04Rik	zinc finger protein 626	protein-coding
upeaks-21366	chr18	44623451	44623759	+	0	NA	intron (NM_001085373, intron 3 of 18)	intron (NM_001085373, intron 3 of 18)	-38060	NR_026853	626275	Mm.427116	NR_026853	ENSMUSG00000097610	A930012L18Rik	-	RIKEN cDNA A930012L18 gene	ncRNA
upeaks-6767	chr11	52534543	52534742	+	0	NA	Intergenic	(ATG)n|Simple_repeat|Simple_repeat	138214	NM_153117	213673	Mm.291979	NM_153117	ENSMUSG00000036275	9530068E07Rik	C85061|Kct2	RIKEN cDNA 9530068E07 gene	protein-coding
upeaks-23156	chr19	43916653	43916931	+	0	NA	intron (NM_028029, intron 1 of 15)	intron (NM_028029, intron 1 of 15)	23406	NM_028029	71972	Mm.159024	NM_028029	ENSMUSG00000025195	Dnmbp	2410003L07Rik|2410003M15Rik|TUBA	dynamin binding protein	protein-coding
upeaks-6385	chr11	31530908	31531178	+	0	NA	Intergenic	Intergenic	140819	NM_001024919	69556	Mm.34183	NM_001024919	ENSMUSG00000044502	Bod1	2310022M17Rik|BOD2.1|Fam44b	biorientation of chromosomes in cell division 1	protein-coding
upeaks-237	chr1	20863731	20864132	+	0	NA	Intergenic	Intergenic	26542	NR_040492	77741	Mm.159984	NR_040492	ENSMUSG00000097934	6720483E21Rik	-	RIKEN cDNA 6720483E21 gene	ncRNA
upeaks-9657	chr12	36523491	36523890	+	0	NA	intron (NM_178629, intron 8 of 9)	intron (NM_178629, intron 8 of 9)	108074	NR_037309	100499526		NR_037309	ENSMUSG00000092917	Mir3472	mmu-mir-3472	microRNA 3472	ncRNA
upeaks-14607	chr14	73253317	73253774	+	0	NA	intron (NM_009029, intron 17 of 26)	(A)n|Simple_repeat|Simple_repeat	15654	NM_175116	67168	Mm.390681	NM_175116	ENSMUSG00000033446	Lpar6	2610302I02Rik|P2ry5|P2y5	lysophosphatidic acid receptor 6	protein-coding
upeaks-7599	chr11	79157829	79158250	+	0	NA	Intergenic	Intergenic	-11685	NM_013571	16706	Mm.4745	NM_013571	ENSMUSG00000018334	Ksr1	AW492498|B-KSR1|D11Bhm183e|D11Bhm184e|Ksr|RSU2|hb	kinase suppressor of ras 1	protein-coding
upeaks-24273	chr2	31048977	31049176	+	0	NA	intron (NM_001177648, intron 10 of 16)	B1_Mur4|SINE|Alu	47424	NM_001177650	14269	Mm.52297	NM_019406	ENSMUSG00000075415	Fnbp1	1110057E06Rik|2210010H06Rik|FBP1|Fbp17	formin binding protein 1	protein-coding
upeaks-12428	chr13	70867030	70867377	+	0	NA	Intergenic	Intergenic	-15745	NM_029873	77166	Mm.159859	NM_029873	ENSMUSG00000021600	8030423J24Rik	-	RIKEN cDNA 8030423J24 gene	protein-coding
upeaks-16694	chr15	90109532	90109817	+	0	NA	Intergenic	Intergenic	-114637	NM_001033441	380959	Mm.17853	NM_001033441	ENSMUSG00000075470	Alg10b	AA469671|AU045404|AW123895|C85569|Deaf1|Gm917|nse5	asparagine-linked glycosylation 10B (alpha-1,2-glucosyltransferase)	protein-coding
upeaks-7706	chr11	83850654	83850908	+	0	NA	promoter-TSS (NM_001291268)	promoter-TSS (NM_001291268)	-88	NM_009330	21410	Mm.7226	NM_009330	ENSMUSG00000020679	Hnf1b	HNF-1-beta|HNF-1B|HNF-1Beta|Hnf1beta|LFB3|Tcf-2|Tcf2|vHNF1	HNF1 homeobox B	protein-coding
upeaks-44562	chr9	14770877	14771161	+	0	NA	promoter-TSS (NM_029306)	promoter-TSS (NM_029306)	11	NM_029306	69325	Mm.440453	NM_029306	ENSMUSG00000031927	1700012B09Rik	1700007P19Rik	RIKEN cDNA 1700012B09 gene	protein-coding
upeaks-22850	chr19	30202231	30202566	+	0	NA	Intergenic	Intergenic	-26957	NM_138595	104174	Mm.274852	NM_138595	ENSMUSG00000024827	Gldc	D030049L12Rik|D19Wsu57e	glycine decarboxylase	protein-coding
upeaks-34741	chr5	100861294	100861502	+	0	NA	intron (NM_172715, intron 3 of 12)	intron (NM_172715, intron 3 of 12)	15169	NM_172715	231510	Mm.271911	NM_172715	ENSMUSG00000029314	Agpat9	1-AGPAT|1-AGPAT 9|4933407I02Rik|4933408F15|A230097K15Rik|GPAT-3|Gpat3|mGPAT3	1-acylglycerol-3-phosphate O-acyltransferase 9	protein-coding
upeaks-3592	chr10	22868557	22868768	+	0	NA	Intergenic	Intergenic	-48534	NM_011545	21412	Mm.16497	NM_011545	ENSMUSG00000045680	Tcf21	Pod-1|Pod1|bHLHa23|capsulin|epc|epicardin	transcription factor 21	protein-coding
upeaks-16403	chr15	80208578	80208905	+	0	NA	intron (NM_010795, intron 1 of 1)	intron (NM_010795, intron 1 of 1)	-25339	NM_178719	239555	Mm.307163	NM_178719	ENSMUSG00000022412	Mief1	A230016E22|AI452372|Smcr7l	mitochondrial elongation factor 1	protein-coding
upeaks-33813	chr5	35104626	35105079	+	0	NA	intron (NM_013587, intron 1 of 7)	intron (NM_013587, intron 1 of 7)	845	NM_013587	16976	Mm.277661	NM_013587	ENSMUSG00000029103	Lrpap1	AA617339|AI790446|AU042172|C77774|HBP44|RAP	low density lipoprotein receptor-related protein associated protein 1	protein-coding
upeaks-29413	chr3	122128993	122129333	+	0	NA	intron (NM_007378, intron 23 of 49)	intron (NM_007378, intron 23 of 49)	84703	NM_007378	11304	Mm.3918	NM_007378	ENSMUSG00000028125	Abca4	AW050280|Abc10|Abcr|D430003I15Rik|RmP	ATP-binding cassette, sub-family A (ABC1), member 4	protein-coding
upeaks-12200	chr13	58214394	58214785	+	0	NA	intron (NM_026842, intron 1 of 10)	intron (NM_026842, intron 1 of 10)	1064	NM_152234	56085	Mm.182053	NM_026842	ENSMUSG00000005312	Ubqln1	1110046H03Rik|1810030E05Rik|AU019746|C77538|D13Ertd372e|Da41|Dsk2|Plic-1|Plic1|Xdrp1	ubiquilin 1	protein-coding
upeaks-39945	chr7	49553598	49553922	+	0	NA	intron (NM_175272, intron 16 of 37)	intron (NM_175272, intron 16 of 37)	83075	NM_001005232	13172	Mm.307176	NM_001005232	ENSMUSG00000030507	Dbx1	AI426026|Dbx	developing brain homeobox 1	protein-coding
upeaks-42547	chr8	41192507	41192706	+	0	NA	intron (NM_145594, intron 7 of 7)	RMER16B2|LTR|ERVK	22550	NM_145594	234199	Mm.277955	NM_145594	ENSMUSG00000031594	Fgl1	Mfire1	fibrinogen-like protein 1	protein-coding
upeaks-43395	chr8	90445779	90446013	+	0	NA	Intergenic	(GCATG)n|Simple_repeat|Simple_repeat	-97644	NM_172913	244579	Mm.302755	NM_172913	ENSMUSG00000043668	Tox3	500-9|BC052044|C230068E13|CAGF9|Tnrc9	TOX high mobility group box family member 3	protein-coding
upeaks-14914	chr14	103376910	103377192	+	0	NA	Intergenic	Intergenic	-30251	NM_207215	105689	Mm.6478	NM_207215	ENSMUSG00000033004	Mycbp2	AU023734|AW107953|AW546647|C130061D10Rik|Pam|Phr1|R75243	MYC binding protein 2	protein-coding
upeaks-20100	chr17	64643639	64644049	+	0	NA	intron (NM_008549, intron 4 of 21)	intron (NM_008549, intron 4 of 21)	42195	NM_008549	17158	Mm.2433	NM_008549	ENSMUSG00000024085	Man2a1	Mana-2|Mana2|Map-2	mannosidase 2, alpha 1	protein-coding
upeaks-24747	chr2	59680927	59681126	+	0	NA	intron (NM_198294, intron 2 of 26)	intron (NM_198294, intron 2 of 26)	34257	NM_001290659	66860	Mm.27917	NM_198294	ENSMUSG00000035168	Tanc1	1200003E16Rik|Tanc|mKIAA1728	tetratricopeptide repeat, ankyrin repeat and coiled-coil containing 1	protein-coding
upeaks-35564	chr5	130938392	130938830	+	0	NA	intron (NM_145218, intron 6 of 10)	intron (NM_145218, intron 6 of 10)	368911	NM_145218	212996	Mm.299204	NM_145218	ENSMUSG00000034040	Wbscr17	AA388321|E330012B09Rik	Williams-Beuren syndrome chromosome region 17 homolog (human)	protein-coding
upeaks-6200	chr11	20477308	20477773	+	0	NA	Intergenic	Intergenic	-65713	NM_021372	58172	Mm.339676	NM_021372	ENSMUSG00000049800	Sertad2	AB041541|AU021878|Kiaa0127|MNCb-1504|SEI-2|Sei2|TRIP-Br2|mKIAA0127	SERTA domain containing 2	protein-coding
upeaks-22168	chr18	84771473	84771947	+	0	NA	Intergenic	Intergenic	51468	NM_173770	240479	Mm.472378	NM_173770	ENSMUSG00000047992	Fam69c	B230399E16Rik	family with sequence similarity 69, member C	protein-coding
upeaks-47904	chrX	142577499	142577910	+	0	NA	Intergenic	Intergenic	-103696	NM_001199357	209497	Mm.249648	NM_177592	ENSMUSG00000047045	Tmem164	AI316850|AI852450|AW547186|F730011B02	transmembrane protein 164	protein-coding
upeaks-14038	chr14	47634457	47634656	+	0	NA	Intergenic	Intergenic	-14755	NM_001347525	16709	Mm.3110	NM_008477	ENSMUSG00000021843	Ktn1	-	kinectin 1	protein-coding
upeaks-46750	chr9	113192851	113193068	+	0	NA	Intergenic	ORR1E|LTR|ERVL-MaLR	394193	NR_040760	102688	Mm.394901	NR_040760	ENSMUSG00000109890	AU023762	-	expressed sequence AU023762	ncRNA
upeaks-24948	chr2	70901548	70901892	+	0	NA	Intergenic	Intergenic	-76240	NM_172664	228012	Mm.136511	NM_172664	ENSMUSG00000041997	Tlk1	4930545J15Rik	tousled-like kinase 1	protein-coding
upeaks-35353	chr5	122690547	122690916	+	0	NA	intron (NM_001038845, intron 12 of 12)	intron (NM_001038845, intron 12 of 12)	-16813	NM_001310718	18438	Mm.290884	NM_011026	ENSMUSG00000029470	P2rx4	AI504491|AW555605|D5Ertd444e|P2X4	purinergic receptor P2X, ligand-gated ion channel 4	protein-coding
upeaks-47408	chrX	56705669	56705970	+	0	NA	Intergenic	Intergenic	-25942	NM_010211	14199	Mm.3126	NM_010211	ENSMUSG00000023092	Fhl1	FHL-1|KyoT|RAM14-1|SLIM|SLIM-1	four and a half LIM domains 1	protein-coding
upeaks-13004	chr13	106893239	106893559	+	0	NA	intron (NM_029665, intron 9 of 29)	intron (NM_029665, intron 9 of 29)	43516	NM_029665	76582	Mm.132208	NM_029665	ENSMUSG00000042590	Ipo11	1700081H05Rik|2510001A17Rik|AI314624|AW555235|E330021B14Rik|Ranbp11	importin 11	protein-coding
upeaks-40177	chr7	71392872	71393117	+	0	NA	Intergenic	Intergenic	-516701	NR_130995	78156	Mm.243818	NR_130995	ENSMUSG00000108669	4930441H08Rik	-	RIKEN cDNA 4930441H08 gene	ncRNA
upeaks-14443	chr14	65335934	65336137	+	0	NA	Intergenic	Intergenic	-22641	NM_199029	380912	Mm.270087	NM_199029	ENSMUSG00000034522	Zfp395	BC053701|Gm910	zinc finger protein 395	protein-coding
upeaks-7935	chr11	90666406	90666642	+	0	NA	intron (NM_028011, intron 7 of 15)	intron (NM_028011, intron 7 of 15)	21077	NM_028011	71943	Mm.167868	NM_028011	ENSMUSG00000020541	Tom1l1	2310045L10Rik|C80573|Srcasm	target of myb1-like 1 (chicken)	protein-coding
upeaks-40100	chr7	67216412	67216699	+	0	NA	intron (NR_131044, intron 2 of 2)	MLTR14|LTR|ERV1	5903	NR_131044	76628	Mm.384589	NR_131043	ENSMUSG00000097527	1700112J16Rik	-	RIKEN cDNA 1700112J16 gene	ncRNA
upeaks-13760	chr14	30704545	30704785	+	0	NA	Intergenic	Intergenic	-10184	NM_019460	54650	Mm.294662	NM_019460	ENSMUSG00000006527	Sfmbt1	4930442N21Rik|9330180L21Rik|AA536974|Sfmbt|Smr	Scm-like with four mbt domains 1	protein-coding
upeaks-27534	chr2	181959684	181960013	+	0	NA	Intergenic	ETnERV-int|LTR|ERVK	-31378	NM_001205282	672125	Mm.489571	NM_001205282	ENSMUSG00000098505	Gm14496	OTTMUSG00000016837	predicted gene 14496	protein-coding
upeaks-6213	chr11	20771902	20772172	+	0	NA	Intergenic	RLTR5_Mm|LTR|ERV1	-30481	NM_001290545	216549	Mm.356580	NM_181411	ENSMUSG00000049659	Aftph	-	aftiphilin	protein-coding
upeaks-1587	chr1	118983039	118983248	+	0	NA	intron (NM_001081125, intron 2 of 13)	MTD|LTR|ERVL-MaLR	28923	NR_105764	102465176		NR_105764	ENSMUSG00000098273	Mir6346	Gm27829|mmu-mir-6346	microRNA 6346	ncRNA
upeaks-1079	chr1	77475816	77476386	+	0	NA	intron (NM_007936, intron 3 of 17)	intron (NM_007936, intron 3 of 17)	20667	NR_105770	102465180		NR_105770	ENSMUSG00000099141	Mir6352	Gm27481|mmu-mir-6352	microRNA 6352	ncRNA
upeaks-24816	chr2	62278843	62279080	+	0	NA	intron (NM_001242378, intron 15 of 25)	intron (NM_001242378, intron 15 of 25)	133270	NM_010074	13482	Mm.1151	NM_010074	ENSMUSG00000035000	Dpp4	Cd26|Dpp-4|THAM	dipeptidylpeptidase 4	protein-coding
upeaks-20737	chr18	5092621	5092876	+	0	NA	intron (NM_001347449, intron 15 of 30)	intron (NM_001347449, intron 15 of 30)	46159	NM_001347449	225115	Mm.136791	NM_153153	ENSMUSG00000024236	Svil	AU024053|B430302E16Rik	supervillin	protein-coding
upeaks-35722	chr5	136051512	136051968	+	0	NA	Intergenic	Intergenic	-5527	NM_027158	69665	Mm.75713	NM_027158	ENSMUSG00000006143	Upk3bl	2310043J07Rik	uroplakin 3B-like	protein-coding
upeaks-19901	chr17	49996087	49996286	+	0	NA	intron (NM_181397, intron 9 of 9)	intron (NM_181397, intron 9 of 9)	194311	NM_181397	76438	Mm.41854	NM_181397	ENSMUSG00000039316	Rftn1	2310015N21Rik|AI853526	raftlin lipid raft linker 1	protein-coding
upeaks-1641	chr1	121462362	121462608	+	0	NA	intron (NM_001025156, intron 10 of 23)	intron (NM_001025156, intron 10 of 23)	31418	NM_029955	70829	Mm.25788	NM_027567	ENSMUSG00000026339	Ccdc93	4633402D15Rik|9230102M16Rik	coiled-coil domain containing 93	protein-coding
upeaks-472	chr1	39235191	39235519	+	0	NA	intron (NM_008719, intron 1 of 20)	intron (NM_008719, intron 1 of 20)	41083	NM_008719	18143	Mm.2380	NM_008719	ENSMUSG00000026077	Npas2	MOP4|bHLHe9	neuronal PAS domain protein 2	protein-coding
upeaks-40730	chr7	101029516	101029788	+	0	NA	Intergenic	Intergenic	-17599	NM_001302346	18442	Mm.3000	NM_008773	ENSMUSG00000032860	P2ry2	P2U1|P2Y2	purinergic receptor P2Y, G-protein coupled 2	protein-coding
upeaks-25504	chr2	104129137	104129482	+	0	NA	Intergenic	Intergenic	6540	NM_026634	68243	Mm.158191	NM_026634	ENSMUSG00000032671	A930018P22Rik	-	RIKEN cDNA A930018P22 gene	protein-coding
upeaks-22692	chr19	22736885	22737112	+	0	NA	intron (NM_001035243, intron 6 of 23)	intron (NM_001035243, intron 6 of 23)	-13607	NR_029591	387200		NR_029591	ENSMUSG00000065507	Mir204	Mirn204|mir-204|mmu-mir-204	microRNA 204	ncRNA
upeaks-21420	chr18	47350444	47350819	+	0	NA	intron (NM_001311097, intron 1 of 17)	intron (NM_001311097, intron 1 of 17)	18237	NM_018744	20358	Mm.40909	NM_018744	ENSMUSG00000019647	Sema6a	A730020P05Rik|AI851735|Sema6A-1|Semaq|VIa	sema domain, transmembrane domain (TM), and cytoplasmic domain, (semaphorin) 6A	protein-coding
upeaks-25468	chr2	103282238	103282571	+	0	NA	intron (NM_007914, intron 2 of 8)	intron (NM_007914, intron 2 of 8)	20792	NM_007914	13661	Mm.10724	NM_007914	ENSMUSG00000012350	Ehf	9030625L19Rik|AU019492	ets homologous factor	protein-coding
upeaks-34257	chr5	66346814	66347016	+	0	NA	intron (NM_001310626, intron 10 of 15)	intron (NM_001310626, intron 10 of 15)	-9250	NM_001201416	11787	Mm.5159	NM_009686	ENSMUSG00000029207	Apbb2	2310007D03Rik|FE65L1|Rirl1|TR2L|Zfra	amyloid beta (A4) precursor protein-binding, family B, member 2	protein-coding
upeaks-43507	chr8	94781740	94782280	+	0	NA	3' UTR (NM_009142, exon 3 of 3)	3' UTR (NM_009142, exon 3 of 3)	9830	NM_009142	20312	Mm.103711	NM_009142	ENSMUSG00000031778	Cx3cl1	AB030188|ABCD-3|AI848747|CX3C|Cxc3|D8Bwg0439e|Scyd1	chemokine (C-X3-C motif) ligand 1	protein-coding
upeaks-593	chr1	51245480	51245712	+	0	NA	intron (NR_045151, intron 4 of 4)	intron (NR_045151, intron 4 of 4)	-43530	NM_138741	20324	Mm.398690	NM_138741	ENSMUSG00000045954	Sdpr	-	serum deprivation response	protein-coding
upeaks-32987	chr4	148632370	148632582	+	0	NA	Intergenic	MLTR18_MM|LTR|ERVK	-5480	NM_001008545	230908	Mm.22453	NM_145556	ENSMUSG00000041459	Tardbp	1190002A23Rik|C85084|TDP-43|Tdp43	TAR DNA binding protein	protein-coding
upeaks-4217	chr10	61160132	61160410	+	0	NA	Intergenic	Intergenic	-11693	NM_001017419	65971	Mm.30227	NM_023064	ENSMUSG00000020096	Tbata	1700021K02Rik|AI428928|Spatial|Titest	thymus, brain and testes associated	protein-coding
upeaks-24616	chr2	50347657	50347856	+	0	NA	intron (NR_040362, intron 1 of 2)	intron (NR_040362, intron 1 of 2)	50946	NR_040362	100502624	Mm.382825	NR_040361	ENSMUSG00000085862	Gm13483	OTTMUSG00000012382	predicted gene 13483	ncRNA
upeaks-16936	chr15	99352395	99352695	+	0	NA	intron (NM_001310622, intron 1 of 25)	intron (NM_001310622, intron 1 of 25)	17937	NM_011711	22379	Mm.29043	NM_011711	ENSMUSG00000023008	Fmnl3	2700073B04Rik|FBP11|Wbp3|mKIAA2014	formin-like 3	protein-coding
upeaks-47000	chr9	120985593	120985865	+	0	NA	intron (NM_177589, intron 35 of 36)	intron (NM_177589, intron 35 of 36)	30643	NR_106058	102465661		NR_106058	ENSMUSG00000106193	Mir7090	mmu-mir-7090	microRNA 7090	ncRNA
upeaks-34799	chr5	104002461	104003238	+	0	NA	intron (NM_053262, intron 5 of 6)	intron (NM_053262, intron 5 of 6)	18947	NM_053262	114664	Mm.46019	NM_053262	ENSMUSG00000029311	Hsd17b11	Dhrs8|Pan1b|SDR2|retSDR2	hydroxysteroid (17-beta) dehydrogenase 11	protein-coding
upeaks-27653	chr3	16179320	16179645	+	0	NA	Intergenic	RLTR30D_MM|LTR|ERV1	-3701	NM_001145919	229096	Mm.23834	NM_172677	ENSMUSG00000047213	Ythdf3	9130022A11Rik	YTH domain family 3	protein-coding
upeaks-23851	chr2	17932511	17932895	+	0	NA	Intergenic	Intergenic	64255	NM_026627	68231	Mm.23887	NM_026627	ENSMUSG00000062651	H2afb1	1700113O17Rik|H2A.Bbd|H2al2|TSEG-1|Tseg1	H2A histone family, member B1	protein-coding
upeaks-8355	chr11	101809113	101809408	+	0	NA	Intergenic	Intergenic	-23950	NM_001316365	18612	Mm.5025	NM_008815	ENSMUSG00000017724	Etv4	AW414408|Pea-3|Pea3	ets variant 4	protein-coding
upeaks-48106	chrX	166706999	166707503	+	0	NA	Intergenic	MLTR14|LTR|ERV1	45226	NR_046015	382255	Mm.336320	NR_046015	ENSMUSG00000086860	Gm1720	-	predicted gene 1720	ncRNA
upeaks-18411	chr16	87307228	87307721	+	0	NA	Intergenic	Intergenic	-46711	NM_026366	67768	Mm.296532	NM_026366	ENSMUSG00000044442	N6amt1	5830445C04Rik|Hemk2|Pred28	N-6 adenine-specific DNA methyltransferase 1 (putative)	protein-coding
upeaks-13629	chr14	24262987	24263279	+	0	NA	Intergenic	Intergenic	-17213	NM_027726	71228	Mm.68971	NM_027726	ENSMUSG00000021782	Dlg5	4933429D20Rik|T25557|mKIAA0583	discs, large homolog 5 (Drosophila)	protein-coding
upeaks-41045	chr7	115265044	115265293	+	0	NA	Intergenic	MLTR14|LTR|ERV1	313894	NR_040319	101786	Mm.395157	NR_040317	ENSMUSG00000108379	A730082K24Rik	AU044236	RIKEN cDNA A730082K24 gene	ncRNA
upeaks-18568	chr16	92939558	92939851	+	0	NA	Intergenic	Intergenic	-113630	NM_001111021	12394	Mm.4081	NM_009821	ENSMUSG00000022952	Runx1	AML1|CBF-alpha-2|Cbfa2|Pebp2a2|Pebpa2b	runt related transcription factor 1	protein-coding
upeaks-30243	chr4	3780947	3781161	+	0	NA	exon (NM_001111096, exon 11 of 13)	exon (NM_001111096, exon 11 of 13)	54601	NM_026147	67427	Mm.21938	NM_026147	ENSMUSG00000028234	Rps20	4632426K06Rik|Dsk4	ribosomal protein S20	protein-coding
upeaks-10813	chr12	108886855	108887414	+	0	NA	intron (NM_011710, intron 2 of 10)	intron (NM_011710, intron 2 of 10)	6064	NM_001164488	22375	Mm.38433	NM_011710	ENSMUSG00000021266	Wars	TrpRS|WRS	tryptophanyl-tRNA synthetase	protein-coding
upeaks-3989	chr10	44913859	44914171	+	0	NA	Intergenic	Intergenic	-153199	NM_011156	19072	Mm.10281	NM_011156	ENSMUSG00000019849	Prep	AI047692|AI450383|D10Wsu136e|PEP|Pop	prolyl endopeptidase	protein-coding
upeaks-4855	chr10	85459064	85459296	+	0	NA	intron (NM_028709, intron 1 of 16)	intron (NM_028709, intron 1 of 16)	72366	NM_028709	74007	Mm.36544	NM_028709	ENSMUSG00000020042	Btbd11	6330404E16Rik	BTB (POZ) domain containing 11	protein-coding
upeaks-17568	chr16	23032069	23032311	+	0	NA	Intergenic	RLTR1D2_MM|LTR|ERV1	-3089	NM_201375	385643	Mm.440414	NM_201375	ENSMUSG00000060459	Kng2	-	kininogen 2	protein-coding
upeaks-5340	chr10	111696889	111697197	+	0	NA	Intergenic	ORR1D2|LTR|ERVL-MaLR	-102770	NR_045344	71321	Mm.410785	NR_045344	ENSMUSG00000097082	4933440J02Rik	-	RIKEN cDNA 4933440J02 gene	ncRNA
upeaks-29396	chr3	121834330	121834587	+	0	NA	Intergenic	LTR33|LTR|ERVL	-19243	NM_008991	19299	Mm.399042	NM_008991	ENSMUSG00000028127	Abcd3	AI313901|AU018866|AW146054|PMP68|PMP70|Pxmp1	ATP-binding cassette, sub-family D (ALD), member 3	protein-coding
upeaks-43930	chr8	115162454	115162654	+	0	NA	intron (NM_019573, intron 8 of 8)	intron (NM_019573, intron 8 of 8)	544340	NM_001025577	17132	Mm.275549	NM_001025577	ENSMUSG00000055435	Maf	2810401A20Rik|A230108G15Rik|AW047063|c-maf	avian musculoaponeurotic fibrosarcoma oncogene homolog	protein-coding
upeaks-26942	chr2	163559318	163559708	+	0	NA	intron (NM_008261, intron 5 of 9)	MIR3|SINE|MIR	12358	NM_008261	15378	Mm.202383	NM_008261	ENSMUSG00000017950	Hnf4a	HNF-4|Hnf4|Hnf4alpha|MODY1|Nr2a1|TCF-14|Tcf14	hepatic nuclear factor 4, alpha	protein-coding
upeaks-38168	chr6	120275139	120275457	+	0	NA	intron (NM_198884, intron 1 of 19)	intron (NM_198884, intron 1 of 19)	19261	NM_198884	330406	Mm.321840	NM_198884	ENSMUSG00000041372	B4galnt3	AB114826|B4GalNAcT3|C330047A21	beta-1,4-N-acetyl-galactosaminyl transferase 3	protein-coding
upeaks-5160	chr10	99913189	99913568	+	0	NA	Intergenic	Intergenic	-102443	NM_013598	17311	Mm.45124	NM_013598	ENSMUSG00000019966	Kitl	Clo|Con|Gb|Kitlg|Mgf|SCF|SF|SLF|Sl|blz|contrasted	kit ligand	protein-coding
upeaks-14130	chr14	54233541	54233740	+	0	NA	Intergenic	Intergenic	20289	NM_001113358	13135	Mm.319038	NM_010015	ENSMUSG00000022174	Dad1	AI323713	defender against cell death 1	protein-coding
upeaks-18037	chr16	46798549	46798748	+	0	NA	Intergenic	Intergenic	-301681	NM_021497	58998	Mm.40477	NM_021495	ENSMUSG00000022656	Nectin3	2610301B19Rik|3000002N23Rik|4921513D19Rik|AA407785|AU016832|AW538082|CD113|Pvrl3	nectin cell adhesion molecule 3	protein-coding
upeaks-16964	chr15	99941381	99941971	+	0	NA	Intergenic	Intergenic	-10018	NM_028180	72277	Mm.272766	NM_028180	ENSMUSG00000045350	1700030F18Rik	FAM186A	RIKEN cDNA 1700030F18 gene	protein-coding
upeaks-41705	chr7	141121123	141121514	+	0	NA	Intergenic	Intergenic	-3512	NM_178381	71345	Mm.235813	NM_178381	ENSMUSG00000054662	Ano9	5430425C04Rik|Tmem16j|Tp53i5|Trp53i5	anoctamin 9	protein-coding
upeaks-44821	chr9	30597297	30597568	+	0	NA	Intergenic	LTRIS2|LTR|ERV1	170103	NM_028874	102607	Mm.35084	NM_028874	ENSMUSG00000031993	Snx19	3526401K03Rik|AI195321|AI848208|mKIAA0254	sorting nexin 19	protein-coding
upeaks-39150	chr7	16618611	16618839	+	0	NA	intron (NR_136929, intron 1 of 2)	intron (NR_136929, intron 1 of 2)	-3732	NM_172739	232906	Mm.28646	NM_172739	ENSMUSG00000058230	Arhgap35	6430596G11Rik|AI841135|Grlf1|mKIAA1722|p190A|p190RhoGAP	Rho GTPase activating protein 35	protein-coding
upeaks-36990	chr6	50981769	50982163	+	0	NA	Intergenic	Intergenic	205851	NR_045984	319981	Mm.131454	NR_045984	ENSMUSG00000107667	C530044C16Rik	-	RIKEN cDNA C530044C16 gene	ncRNA
upeaks-30296	chr4	8164961	8165263	+	0	NA	intron (NM_007592, intron 8 of 8)	intron (NM_007592, intron 8 of 8)	73929	NM_007592	12319	Mm.119320	NM_007592	ENSMUSG00000041261	Car8	AW546993|Ca8|Cals|Cals1|Carp|wdl	carbonic anhydrase 8	protein-coding
upeaks-7543	chr11	77772297	77772709	+	0	NA	Intergenic	Intergenic	-4732	NM_011586	360013	Mm.341248	NM_011586	ENSMUSG00000000631	Myo18a	MAJN|MyoPDZ|MysPDZ|SP-R210	myosin XVIIIA	protein-coding
upeaks-10142	chr12	77105960	77106159	+	0	NA	Intergenic	GA-rich|Low_complexity|Low_complexity	-132045	NM_001252614	53618	Mm.35628	NM_016893	ENSMUSG00000021065	Fut8	-	fucosyltransferase 8	protein-coding
upeaks-20653	chr17	88542840	88543498	+	0	NA	intron (NM_028658, intron 2 of 21)	intron (NM_028658, intron 2 of 21)	13045	NM_028658	73825	Mm.271817	NM_028658	ENSMUSG00000034709	Ppp1r21	1110018J12Rik|AI426045|AW550781|Ccdc128|Klraq1	protein phosphatase 1, regulatory subunit 21	protein-coding
upeaks-27903	chr3	36207647	36208290	+	0	NA	intron (NM_198192, intron 1 of 5)	intron (NM_198192, intron 1 of 5)	14307	NM_198192	229214	Mm.330975	NM_198192	ENSMUSG00000058400	Qrfpr	AQ27|Gpr103|SP9155	pyroglutamylated RFamide peptide receptor	protein-coding
upeaks-9472	chr12	25140137	25140529	+	0	NA	Intergenic	Intergenic	11159	NR_045844	432641	Mm.112955	NR_045844		Gm17746	-	predicted gene, 17746	ncRNA
upeaks-45090	chr9	43737880	43738265	+	0	NA	Intergenic	Intergenic	-6504	NM_021424	58235	Mm.335096	NM_021424	ENSMUSG00000032012	Nectin1	AI835281|AW549174|Cd111|HIgR|HveC|PRR|PRR1|Pvrl1|nectin-1	nectin cell adhesion molecule 1	protein-coding
upeaks-30735	chr4	44851902	44852243	+	0	NA	intron (NM_138590, intron 2 of 8)	intron (NM_138590, intron 2 of 8)	95513	NM_138590	319885	Mm.331576	NM_138590	ENSMUSG00000035649	Zcchc7	4930572I07Rik|D4Wsu132e	zinc finger, CCHC domain containing 7	protein-coding
upeaks-27691	chr3	20057395	20058204	+	0	NA	promoter-TSS (NR_105046)	promoter-TSS (NR_105046)	-12	NM_009210	20585	Mm.209650	NM_009210	ENSMUSG00000002428	Hltf	AF010600|BC057116|P113|Smarca3|Snf2l3	helicase-like transcription factor	protein-coding
upeaks-15118	chr14	119987391	119987657	+	0	NA	Intergenic	B4|SINE|B4	54911	NM_001001490	239283	Mm.138520	NM_001001490	ENSMUSG00000044819	Oxgr1	Cysltr3|Gm299|Gpr80|Gpr99|P2Y15	oxoglutarate (alpha-ketoglutarate) receptor 1	protein-coding
upeaks-43763	chr8	108068361	108068632	+	0	NA	Intergenic	Intergenic	-480014	NM_010817	17463	Mm.18347	NM_010817	ENSMUSG00000039067	Psmd7	AW107203|Mov-34|Mov34	proteasome (prosome, macropain) 26S subunit, non-ATPase, 7	protein-coding
upeaks-22512	chr19	9975059	9975327	+	0	NA	Intergenic	Intergenic	-5407	NR_073181	14319	Mm.1776	NM_010239	ENSMUSG00000024661	Fth1	FHC|Fth|HFt|MFH	ferritin heavy polypeptide 1	protein-coding
upeaks-3321	chr10	7333370	7333693	+	0	NA	Intergenic	Intergenic	-121294	NM_172546	215748	Mm.37984	NM_172546	ENSMUSG00000015202	Cnksr3	6820402C05|BC024086|Magi1	Cnksr family member 3	protein-coding
upeaks-17349	chr16	14506559	14506817	+	0	NA	Intergenic	MTD|LTR|ERVL-MaLR	-55629	NR_033556	545280	Mm.123679	NR_033556	ENSMUSG00000075395	A630010A05Rik	-	RIKEN cDNA A630010A05 gene	ncRNA
upeaks-43038	chr8	72761375	72761578	+	0	NA	promoter-TSS (NM_007975)	promoter-TSS (NM_007975)	-183	NM_007975	14065	Mm.12948	NM_007975	ENSMUSG00000050147	F2rl3	PAR4	coagulation factor II (thrombin) receptor-like 3	protein-coding
upeaks-2907	chr1	183183624	183183888	+	0	NA	intron (NM_001278218, intron 1 of 8)	intron (NM_001278218, intron 1 of 8)	-36199	NM_001278220	68897	Mm.327216	NM_026866	ENSMUSG00000030768	Disp1	1190008H24Rik|DispA	dispatched RND transporter family member 1	protein-coding
upeaks-14935	chr14	103885258	103885625	+	0	NA	Intergenic	Intergenic	-40965	NM_001136061	13618	Mm.229532	NM_007904	ENSMUSG00000022122	Ednrb	ET-B|ET-BR|ETR-b|ETb|Sox10m1	endothelin receptor type B	protein-coding
upeaks-13845	chr14	33683764	33684065	+	0	NA	Intergenic	Intergenic	94644	NM_008978	19256	Mm.8019	NM_008978	ENSMUSG00000021940	Ptpn20	typ	protein tyrosine phosphatase, non-receptor type 20	protein-coding
upeaks-21449	chr18	49776348	49776635	+	0	NA	Intergenic	Intergenic	-20890	NM_001170960	68857	Mm.96010	NM_026854	ENSMUSG00000024505	Dtwd2	1190002H09Rik|8030470C17Rik|AI414673|BB115449	DTW domain containing 2	protein-coding
upeaks-37893	chr6	104007310	104007554	+	0	NA	Intergenic	Lx3_Mus|LINE|L1	-42748	NR_144494	100846987		NR_144494		Pou5f1-rs5	Gm21054|Oct4P5|Otf3-rs5|Otf3e	POU domain, class 5, transcription factor 1, related sequence 5	pseudo
upeaks-46218	chr9	90155653	90155912	+	0	NA	Intergenic	Intergenic	-7196	NM_001311115	108153	Mm.102141	NM_001003911	ENSMUSG00000032363	Adamts7	ADAM-TS7|ADAMTS7B	a disintegrin-like and metallopeptidase (reprolysin type) with thrombospondin type 1 motif, 7	protein-coding
upeaks-20621	chr17	87562758	87563056	+	0	NA	Intergenic	Intergenic	-73072	NM_008532	17075	Mm.4259	NM_008532	ENSMUSG00000045394	Epcam	CD326|EGP|EGP-2|Egp314|Ep-CAM|EpCAM1|GA733-2|Ly74|TROP1|Tacsd1|Tacstd1|gp40	epithelial cell adhesion molecule	protein-coding
upeaks-1816	chr1	132741677	132741953	+	0	NA	promoter-TSS (NM_001160317)	promoter-TSS (NM_001160317)	-18	NM_001160317	269116	Mm.326702	NM_182716	ENSMUSG00000026442	Nfasc	AA387016|D430023G06Rik|NF|mKIAA0756	neurofascin	protein-coding
upeaks-8817	chr11	115194704	115195122	+	0	NA	intron (NM_001033393, intron 2 of 9)	RLTR14_RN|LTR|ERV1	7426	NM_001033393	320534	Mm.260587	NM_001033393	ENSMUSG00000045980	Tmem104	C630005D06Rik|mFLJ00021	transmembrane protein 104	protein-coding
upeaks-43907	chr8	114018460	114018764	+	0	NA	Intergenic	Intergenic	-114962	NM_001290182	67528	Mm.27889	NM_024437	ENSMUSG00000031767	Nudt7	1300007B24Rik|2210404C19Rik	nudix (nucleoside diphosphate linked moiety X)-type motif 7	protein-coding
upeaks-14045	chr14	48205769	48206044	+	0	NA	intron (NR_003630, intron 2 of 2)	MIRc|SINE|MIR	7190	NR_003630	624367	Mm.445185	NM_001037921	ENSMUSG00000063885	Gm6498	EG624367	glyceraldehyde-3-phosphate dehydrogenase pseudogene	pseudo
upeaks-37167	chr6	59053206	59053669	+	0	NA	Intergenic	Intergenic	-28935	NM_153574	58909	Mm.28813	NM_153574	ENSMUSG00000037709	Fam13a	AI462012|D430015B01Rik|FAM13A1|Precm1	family with sequence similarity 13, member A	protein-coding
upeaks-30998	chr4	59330034	59330254	+	0	NA	intron (NM_001163288, intron 13 of 16)	intron (NM_001163288, intron 13 of 16)	70093	NR_105031	101055769	Mm.421401	NR_105031		Gm12596	OTTMUSG00000007649	predicted gene 12596	ncRNA
upeaks-5616	chr10	122639929	122640267	+	0	NA	Intergenic	Intergenic	-38664	NM_176919	319468	Mm.489703	NM_176919	ENSMUSG00000034613	Ppm1h	A430075L18Rik|ARHCL1|C030002B11Rik	protein phosphatase 1H (PP2C domain containing)	protein-coding
upeaks-30834	chr4	48754568	48755027	+	0	NA	Intergenic	Intergenic	91283	NM_026509	68016	Mm.133444	NM_026509	ENSMUSG00000028348	Murc	2310039E09Rik	muscle-related coiled-coil protein	protein-coding
upeaks-29836	chr3	141723929	141724137	+	0	NA	intron (NM_001293561, intron 3 of 16)	intron (NM_001293561, intron 3 of 16)	207555	NM_001277220	12167	Mm.39089	NM_007560	ENSMUSG00000052430	Bmpr1b	AI385617|ALK-6|AV355320|Acvrlk6|Alk6|BMPR-1B|BMPR-IB|CFK-43a|SKR6	bone morphogenetic protein receptor, type 1B	protein-coding
upeaks-28511	chr3	84429331	84429653	+	0	NA	Intergenic	Intergenic	-49571	NR_040752	75309	Mm.159497	NR_040752	ENSMUSG00000104004	4930565D16Rik	-	RIKEN cDNA 4930565D16 gene	ncRNA
upeaks-31629	chr4	106042415	106042791	+	0	NA	Intergenic	Lx8|LINE|L1	-273610	NM_183225	329908	Mm.234544	NM_183225	ENSMUSG00000028514	Usp24	2700066K03Rik|2810030C21Rik|AI414051|B130021E18|C79851	ubiquitin specific peptidase 24	protein-coding
upeaks-5285	chr10	110421171	110421443	+	0	NA	Intergenic	Intergenic	-179343	NR_028438	109335	Mm.367727	NR_028438		9230102K24Rik	-	RIKEN cDNA 9230102K24 gene	ncRNA
upeaks-26159	chr2	133351378	133351610	+	0	NA	Intergenic	Intergenic	-200665	NM_007553	12156	Mm.103205	NM_007553	ENSMUSG00000027358	Bmp2	AI467020|Bmp2a	bone morphogenetic protein 2	protein-coding
upeaks-9777	chr12	52289234	52289433	+	0	NA	intron (NM_029760, intron 8 of 10)	intron (NM_029760, intron 8 of 10)	191276	NR_136881	102638611	Mm.363799	NR_136881		Gm35135	-	predicted gene, 35135	ncRNA
upeaks-39921	chr7	48749781	48750237	+	0	NA	Intergenic	Intergenic	-38994	NM_028031	243983	Mm.279116	NM_028031	ENSMUSG00000030471	Zdhhc13	2410004E01Rik|C530010M18|HIP3RP|Hip14l|kojak|skc4	zinc finger, DHHC domain containing 13	protein-coding
upeaks-4457	chr10	75429028	75429339	+	0	NA	intron (NM_133995, intron 5 of 9)	intron (NM_133995, intron 5 of 9)	-20327	NR_045841	71125	Mm.399516	NR_045841		4933407G14Rik	-	RIKEN cDNA 4933407G14 gene	ncRNA
upeaks-44845	chr9	31354056	31354453	+	0	NA	intron (NM_001080817, intron 12 of 20)	intron (NM_001080817, intron 12 of 20)	-31938	NM_172766	235134	Mm.238146	NM_172766	ENSMUSG00000042185	Nfrkb	A530090G11Rik	nuclear factor related to kappa B binding protein	protein-coding
upeaks-12599	chr13	81230161	81230521	+	0	NA	intron (NM_054053, intron 85 of 89)	intron (NM_054053, intron 85 of 89)	266267	NR_015587	319983	Mm.343027	NR_015587	ENSMUSG00000097098	9330111N05Rik	-	RIKEN cDNA 9330111N05 gene	ncRNA
upeaks-40509	chr7	89883537	89883781	+	0	NA	intron (NM_001162979, intron 7 of 14)	MTE2b|LTR|ERVL-MaLR	19970	NM_001162979	70884	Mm.252823	NM_001162979	ENSMUSG00000039391	Ccdc81	4921513D09Rik	coiled-coil domain containing 81	protein-coding
upeaks-14414	chr14	63942336	63942599	+	0	NA	Intergenic	Intergenic	-1239	NM_011446	20680	Mm.42162	NM_011446	ENSMUSG00000063060	Sox7	-	SRY (sex determining region Y)-box 7	protein-coding
upeaks-47712	chrX	105391719	105392280	+	0	NA	promoter-TSS (NR_015552)	promoter-TSS (NR_015552)	-245	NR_015552	100043213	Mm.388967	NR_015552	ENSMUSG00000087620	5330434G04Rik	-	RIKEN cDNA 5330434G04 gene	ncRNA
upeaks-794	chr1	63123867	63124543	+	0	NA	intron (NR_045914, intron 1 of 3)	MER21C|LTR|ERVL	9465	NR_045914	100380944	Mm.392955	NR_045914	ENSMUSG00000084799	Ino80dos	Gm11602|OTTMUSG00000002611	INO80 complex subunit D, opposite strand	ncRNA
upeaks-36294	chr6	4667709	4667936	+	0	NA	Intergenic	Intergenic	66756	NM_145398	213819	Mm.270703	NM_145398	ENSMUSG00000015189	Casd1	Cas1|Cast1	CAS1 domain containing 1	protein-coding
upeaks-14953	chr14	105085375	105085863	+	0	NA	Intergenic	Intergenic	29057	NR_040628	100502987	Mm.124957	NR_040628		Gm17066	-	predicted gene 17066	ncRNA
upeaks-9558	chr12	31255136	31255484	+	0	NA	Intergenic	Intergenic	-9984	NM_008482	16777	Mm.172674	NM_008482	ENSMUSG00000002900	Lamb1	C77966|C80098|C81607|D130003D08Rik|Lamb-1|Lamb1-1	laminin B1	protein-coding
upeaks-4371	chr10	69670911	69671362	+	0	NA	intron (NM_170730, intron 1 of 17)	intron (NM_170730, intron 1 of 17)	137428	NM_170688	11735	Mm.235960	NM_009670	ENSMUSG00000069601	Ank3	2900054D09Rik|AI314020|Ank-3|AnkG|Ankyrin-3|Ankyrin-G	ankyrin 3, epithelial	protein-coding
upeaks-3946	chr10	43398675	43398959	+	0	NA	intron (NM_027772, intron 6 of 7)	HAL1|LINE|L1	-80323	NM_199028	331623	Mm.490388	NM_199028	ENSMUSG00000038214	Bend3	mKIAA1553	BEN domain containing 3	protein-coding
upeaks-44316	chr8	125314556	125315055	+	0	NA	Intergenic	Intergenic	177905	NM_001081337	244668	Mm.271668	NM_001081337	ENSMUSG00000001995	Sipa1l2	BC058408|mKIAA1389	signal-induced proliferation-associated 1 like 2	protein-coding
upeaks-19649	chr17	39847498	39848798	+	0	NA	non-coding (NR_046233, exon 1 of 1)	non-coding (NR_046233, exon 1 of 1)	5151	NR_046233	100861531		NR_046233		Rn45s	-	45S pre-ribosomal RNA	rRNA
upeaks-42840	chr8	68276144	68276737	+	0	NA	promoter-TSS (NM_028182)	promoter-TSS (NM_028182)	-88	NM_028182	72281	Mm.40974	NM_028182	ENSMUSG00000053886	Sh2d4a	2210402M20Rik|SH2A	SH2 domain containing 4A	protein-coding
upeaks-47970	chrX	152855245	152855545	+	0	NA	Intergenic	MuLV-int|LTR|ERV1	73474	NM_010951	18241	Mm.5157	NM_010951	ENSMUSG00000025333	Gpr143	Oa1	G protein-coupled receptor 143	protein-coding
upeaks-27315	chr2	173056886	173057207	+	0	NA	Intergenic	Intergenic	35144	NM_019547	56190	Mm.485782	NM_019547	ENSMUSG00000027510	Rbm38	Rnpc1|Seb4|Seb4l	RNA binding motif protein 38	protein-coding
upeaks-8242	chr11	99045536	99045842	+	0	NA	intron (NM_010517, intron 1 of 3)	intron (NM_010517, intron 1 of 3)	4429	NM_010517	16010	Mm.233799	NM_010517	ENSMUSG00000017493	Igfbp4	AI875747|Deb2|IGFBP-4	insulin-like growth factor binding protein 4	protein-coding
upeaks-6294	chr11	25005594	25005840	+	0	NA	Intergenic	Intergenic	-274995	NR_033491	100038617	Mm.387376	NR_033491	ENSMUSG00000073103	Gm10466	ENSMUSG00000073103	predicted gene 10466	ncRNA
upeaks-23182	chr19	44519130	44519534	+	0	NA	exon (NM_001033343, exon 21 of 26)	exon (NM_001033343, exon 21 of 26)	25860	NM_011720	22423	Mm.88365	NM_011720	ENSMUSG00000036961	Wnt8b	-	wingless-type MMTV integration site family, member 8B	protein-coding
upeaks-37246	chr6	67535186	67535531	+	0	NA	exon (NM_020047, exon 1 of 1)	exon (NM_020047, exon 1 of 1)	464	NM_020047	56753	Mm.439913	NM_020047	ENSMUSG00000051397	Tacstd2	C80403|EGP-1|GA733-1|Ly97|TROP2	tumor-associated calcium signal transducer 2	protein-coding
upeaks-31137	chr4	68955702	68955901	+	0	NA	Intergenic	Intergenic	-1404	NM_019967	56710	Mm.248788	NM_019967	ENSMUSG00000028351	Brinp1	BRINP|Dbc1|Dbccr1|Fam5a	bone morphogenic protein/retinoic acid inducible neural specific 1	protein-coding
upeaks-37973	chr6	112833837	112834036	+	0	NA	intron (NM_080448, intron 1 of 21)	intron (NM_080448, intron 1 of 21)	113330	NM_080448	259302	Mm.236401	NM_080448	ENSMUSG00000030257	Srgap3	AI452337|Arhgap14|D130026O08Rik|Gbi|MEGAP|WRP|mKIAA0411	SLIT-ROBO Rho GTPase activating protein 3	protein-coding
upeaks-6045	chr11	8814481	8814694	+	0	NA	Intergenic	Intergenic	-150052	NM_001083587	319939	Mm.337820	NM_001083587	ENSMUSG00000020422	Tns3	BC023928|F830010I22Rik|TEM6|Tens1	tensin 3	protein-coding
upeaks-44103	chr8	120602750	120602950	+	0	NA	Intergenic	Intergenic	-13775	NM_178856	272551	Mm.275910	NM_178856	ENSMUSG00000031821	Gins2	2210013I18Rik|4833427B12Rik|AI323585|Pfs2	GINS complex subunit 2 (Psf2 homolog)	protein-coding
upeaks-1291	chr1	87198594	87199462	+	0	NA	3' UTR (NM_021600, exon 12 of 12)	3' UTR (NM_021600, exon 12 of 12)	-6783	NM_009604	11449	Mm.2810	NM_009604	ENSMUSG00000026253	Chrng	Achr-3|Acrg	cholinergic receptor, nicotinic, gamma polypeptide	protein-coding
upeaks-36955	chr6	49150529	49150802	+	0	NA	intron (NM_023670, intron 3 of 14)	intron (NM_023670, intron 3 of 14)	64289	NM_023670	140488	Mm.281018	NM_023670	ENSMUSG00000029814	Igf2bp3	2610101N11Rik|AA522010|AL022933|AU045931|IMP-3|IMP3|Koc13|Neilsen|mimp3	insulin-like growth factor 2 mRNA binding protein 3	protein-coding
upeaks-16503	chr15	83236794	83237183	+	0	NA	intron (NM_001004150, intron 1 of 2)	RMER17B2|LTR|ERVK	14743	NM_001170954	239559	Mm.323805	NM_001004150	ENSMUSG00000047878	A4galt	-	alpha 1,4-galactosyltransferase	protein-coding
upeaks-2031	chr1	140661463	140661747	+	0	NA	Intergenic	Intergenic	-5203	NR_040604	75910	Mm.483845	NR_040604	ENSMUSG00000102368	4930590L20Rik	-	RIKEN cDNA 4930590L20 gene	ncRNA
upeaks-24885	chr2	66439972	66440407	+	0	NA	promoter-TSS (NR_033495)	promoter-TSS (NR_033495)	648	NM_018733	20265	Mm.439704	NM_018733	ENSMUSG00000064329	Scn1a	B230332M13|Nav1.1	sodium channel, voltage-gated, type I, alpha	protein-coding
upeaks-9742	chr12	47263351	47263615	+	0	NA	Intergenic	Intergenic	-444708	NM_021361	664883	Mm.247195	NM_021361	ENSMUSG00000021047	Nova1	9430099M15Rik|G630039L02|Nova-1	neuro-oncological ventral antigen 1	protein-coding
upeaks-24129	chr2	28430206	28430421	+	0	NA	Intergenic	LTRIS2|LTR|ERV1	-17628	NM_001005420	241289	Mm.330095	NM_001005420	ENSMUSG00000035829	Ppp1r26	Gm347|Kiaa0649|mKIAA0649	protein phosphatase 1, regulatory subunit 26	protein-coding
upeaks-2500	chr1	166974762	166975319	+	0	NA	intron (NR_037988, intron 2 of 2)	RMER15|LTR|ERVL	24690	NR_037988	100503962	Mm.216842	NR_037988	ENSMUSG00000102548	Gm16701	-	predicted gene, 16701	ncRNA
upeaks-11861	chr13	43908324	43908692	+	0	NA	Intergenic	Intergenic	123396	NM_001289915	12522	Mm.57175	NM_009856	ENSMUSG00000015396	Cd83	-	CD83 antigen	protein-coding
upeaks-27178	chr2	168847742	168848273	+	0	NA	Intergenic	Intergenic	-80806	NM_201396	99377	Mm.434054	NM_175303	ENSMUSG00000027547	Sall4	5730441M18Rik|AA407717|AL022809|AW536104|C330011P20Rik|C78083|C78563|Tex20	sal-like 4 (Drosophila)	protein-coding
upeaks-33678	chr5	30661182	30661411	+	0	NA	Intergenic	RLTR1A2_MM|LTR|ERV1	-5590	NM_001302131	12615	Mm.290563	NM_007681	ENSMUSG00000029177	Cenpa	Cenp-A	centromere protein A	protein-coding
upeaks-37057	chr6	53545497	53545844	+	0	NA	intron (NM_001327821, intron 5 of 10)	intron (NM_001327821, intron 5 of 10)	-27704	NM_172728	231991	Mm.227444	NM_172728	ENSMUSG00000053007	Creb5	9430076C15Rik|CRE-BPa|Crebpa|D430026C09Rik	cAMP responsive element binding protein 5	protein-coding
upeaks-35584	chr5	131839776	131839994	+	0	NA	intron (NM_177047, intron 4 of 18)	intron (NM_177047, intron 4 of 18)	-40384	NR_040704	75369	Mm.389696	NR_040704	ENSMUSG00000105773	4930563F08Rik	-	RIKEN cDNA 4930563F08 gene	ncRNA
upeaks-20088	chr17	64214652	64214977	+	0	NA	Intergenic	Intergenic	117069	NM_144859	224938	Mm.489681	NM_144859	ENSMUSG00000024083	Pja2	AI447901|AL022700|Neurodap1|mKIAA0438	praja 2, RING-H2 motif containing	protein-coding
upeaks-12695	chr13	90939193	90939444	+	0	NA	intron (NM_025770, intron 5 of 7)	RLTRETN_Mm|LTR|ERVK	16196	NM_024175	66475	Mm.306302	NM_024175	ENSMUSG00000049517	Rps23	2410044J15Rik	ribosomal protein S23	protein-coding
upeaks-31412	chr4	95276283	95276501	+	0	NA	Intergenic	MLT1D|LTR|ERVL-MaLR	-224170	NM_010591	16476	Mm.275071	NM_010591	ENSMUSG00000052684	Jun	AP-1|Junc|c-jun	jun proto-oncogene	protein-coding
upeaks-5867	chr11	3334921	3335217	+	0	NA	intron (NM_178149, intron 5 of 5)	intron (NM_178149, intron 5 of 5)	4338	NM_178149	216505	Mm.390323	NM_178149	ENSMUSG00000034614	Pik3ip1	1500004A08Rik|5830455E04Rik|Crkd|Hgfl	phosphoinositide-3-kinase interacting protein 1	protein-coding
upeaks-14775	chr14	86772554	86772913	+	0	NA	intron (NM_019670, intron 25 of 27)	intron (NM_019670, intron 25 of 27)	368381	NM_019670	56419	Mm.440585	NM_019670	ENSMUSG00000022021	Diaph3	4930417P13Rik|Dia2|Diap3|Drf3|mDia2|mKIAA4117|p134MDia2	diaphanous related formin 3	protein-coding
upeaks-4010	chr10	45893801	45894271	+	0	NA	Intergenic	Intergenic	86332	NR_040624	320363	Mm.123343	NR_040624	ENSMUSG00000110874	D030045P18Rik	-	RIKEN cDNA D030045P18 gene	ncRNA
upeaks-42711	chr8	57333904	57334131	+	0	NA	intron (NR_131041, intron 1 of 2)	intron (NR_131041, intron 1 of 2)	1582	NR_131041	75996	Mm.399754	NR_131041	ENSMUSG00000097910	5033428I22Rik	-	RIKEN cDNA 5033428I22 gene	ncRNA
upeaks-30862	chr4	53023407	53023766	+	0	NA	Intergenic	RMER1C|Other|Other	11706	NM_001347099	66536	Mm.38244	NM_025623	ENSMUSG00000015247	Nipsnap3b	2700063N13Rik|Nipsnap3a	nipsnap homolog 3B (C. elegans)	protein-coding
upeaks-26305	chr2	140715854	140716080	+	0	NA	intron (NM_001013802, intron 3 of 18)	Lx7|LINE|L1	-44491	NM_001172160	71436	Mm.426781	NM_178382	ENSMUSG00000051379	Flrt3	5530600M07Rik|C430047I10Rik|mKIAA1469	fibronectin leucine rich transmembrane protein 3	protein-coding
upeaks-24158	chr2	29075618	29075831	+	0	NA	intron (NM_009442, intron 7 of 11)	RMER16A3|LTR|ERVK	15461	NM_009442	22130	Mm.252195	NM_009442	ENSMUSG00000026803	Ttf1	AV245725|TTF-1|TTF-I	transcription termination factor, RNA polymerase I	protein-coding
upeaks-31200	chr4	79422589	79422796	+	0	NA	Intergenic	Intergenic	828645	NR_131142	623726		NR_131142		A430085M09Rik	EG623726	RIKEN cDNA A430085M09 gene	ncRNA
upeaks-39940	chr7	49506317	49506747	+	0	NA	intron (NM_175272, intron 11 of 37)	intron (NM_175272, intron 11 of 37)	130303	NM_001005232	13172	Mm.307176	NM_001005232	ENSMUSG00000030507	Dbx1	AI426026|Dbx	developing brain homeobox 1	protein-coding
upeaks-22461	chr19	8605102	8605367	+	0	NA	intron (NM_001164635, intron 3 of 10)	intron (NM_001164635, intron 3 of 10)	12052	NM_001164635	19879	Mm.285294	NM_031194	ENSMUSG00000063796	Slc22a8	Oat3|Roct	solute carrier family 22 (organic anion transporter), member 8	protein-coding
upeaks-29870	chr3	143090874	143091264	+	0	NA	Intergenic	LTR86C|LTR|ERVL	-151986	NR_040551	320072	Mm.136397	NR_040551	ENSMUSG00000105923	A830019L24Rik	-	RIKEN cDNA A830019L24 gene	ncRNA
upeaks-35258	chr5	119712674	119713138	+	0	NA	Intergenic	MIRb|SINE|MIR	-21688	NR_040416	433944	Mm.491053	NR_040416	ENSMUSG00000086847	Tbx3os2	Gm16065|OTTMUSG00000029666	T-box 3, opposite strand 2	ncRNA
upeaks-25560	chr2	106756775	106756989	+	0	NA	intron (NM_029837, intron 3 of 6)	intron (NM_029837, intron 3 of 6)	61281	NM_029837	77015	Mm.45628	NM_029837	ENSMUSG00000016386	Mpped2	239Fb|2700082O15Rik|AV354767|AW060960	metallophosphoesterase domain containing 2	protein-coding
upeaks-45182	chr9	46067756	46068068	+	0	NA	intron (NM_027498, intron 1 of 24)	intron (NM_027498, intron 1 of 24)	55092	NM_027498	70661	Mm.219459	NM_027498	ENSMUSG00000034135	Sik3	5730525O22Rik|9030204A07Rik|AI447252|AI846254|AI849445|Qsk|SIK-3|mKIAA0999	SIK family kinase 3	protein-coding
upeaks-15479	chr15	27304252	27304706	+	0	NA	Intergenic	Intergenic	-162198	NM_020332	11732	Mm.265264	NM_020332	ENSMUSG00000022265	Ank	Ankh|D15Ertd221e|ank|mKIAA1581	progressive ankylosis	protein-coding
upeaks-31591	chr4	105070977	105071287	+	0	NA	intron (NM_178143, intron 2 of 8)	MTE2a|LTR|ERVL-MaLR	38766	NM_178143	108079	Mm.48638	NM_178143	ENSMUSG00000028518	Prkaa2	2310008I11Rik|A830082D05|AMPKalpha2	protein kinase, AMP-activated, alpha 2 catalytic subunit	protein-coding
upeaks-40269	chr7	76883224	76883424	+	0	NA	intron (NM_001199224, intron 21 of 22)	intron (NM_001199224, intron 21 of 22)	653437	NM_001199224	244071	Mm.322829	NM_172902	ENSMUSG00000025754	Agbl1	Ccp4|D430020F16|EG244071|Nna1-l1	ATP/GTP binding protein-like 1	protein-coding
upeaks-36775	chr6	38335238	38335519	+	0	NA	intron (NM_001347122, intron 3 of 12)	intron (NM_001347122, intron 3 of 12)	19225	NM_028421	78781	Mm.25243	NM_028421	ENSMUSG00000029826	Zc3hav1	1200014N16Rik|2900058M19Rik|9130009D18Rik|9830115L13Rik|ARTD13|D6Bwg1452e|ZAP	zinc finger CCCH type, antiviral 1	protein-coding
upeaks-31940	chr4	118122913	118123397	+	0	NA	intron (NM_001161774, intron 1 of 11)	intron (NM_001161774, intron 1 of 11)	11791	NM_009176	20441	Mm.251002	NM_009176	ENSMUSG00000028538	St3gal3	ST3GalIII|ST3N|Siat3|Siat6	ST3 beta-galactoside alpha-2,3-sialyltransferase 3	protein-coding
upeaks-34189	chr5	64345168	64345696	+	0	NA	intron (NM_001310611, intron 21 of 21)	intron (NM_001310611, intron 21 of 21)	115075	NM_001289514	57915	Mm.286353	NM_019636	ENSMUSG00000029174	Tbc1d1	1110062G02Rik|AI385682|AW555803|Nob1|Nobq1|Tbc1|mKIAA1108	TBC1 domain family, member 1	protein-coding
upeaks-11504	chr13	25026492	25027131	+	0	NA	Intergenic	Intergenic	-6494	NM_001013389	380836	Mm.387097	NM_001013389	ENSMUSG00000021339	Mrs2	Gm902|HPT|Mrs2l|RPT	MRS2 magnesium transporter	protein-coding
upeaks-16109	chr15	73802326	73802624	+	0	NA	intron (NM_001033365, intron 2 of 10)	intron (NM_001033365, intron 2 of 10)	37196	NM_001033365	268816	Mm.440635	NM_001033365	ENSMUSG00000072487	Mroh5	Gm628	maestro heat-like repeat family member 5	protein-coding
upeaks-33050	chr4	149916891	149917221	+	0	NA	intron (NM_029035, intron 1 of 2)	intron (NM_029035, intron 1 of 2)	37950	NM_029035	74646	Mm.30	NM_029035	ENSMUSG00000039911	Spsb1	1110014L01Rik|4930422J18Rik|AI596360|AI854583|SSB-1|SSB1	splA/ryanodine receptor domain and SOCS box containing 1	protein-coding
upeaks-46880	chr9	117887098	117887297	+	0	NA	Intergenic	Intergenic	-153325	NM_001286507	27215	Mm.92705	NM_013727	ENSMUSG00000039285	Azi2	AA410145|AZ2	5-azacytidine induced gene 2	protein-coding
upeaks-44010	chr8	117730963	117731494	+	0	NA	intron (NM_008290, intron 1 of 4)	intron (NM_008290, intron 1 of 4)	29282	NM_008290	15486	Mm.276466	NM_008290	ENSMUSG00000031844	Hsd17b2	AI194836|AI194967|AI255511	hydroxysteroid (17-beta) dehydrogenase 2	protein-coding
upeaks-35662	chr5	134941874	134942139	+	0	NA	3' UTR (NM_024479, exon 6 of 6)	3' UTR (NM_024479, exon 6 of 6)	4928	NM_009903	12740	Mm.7339	NM_009903	ENSMUSG00000047501	Cldn4	Cep-r|Cpetr|Cpetr1	claudin 4	protein-coding
upeaks-20652	chr17	88535838	88536110	+	0	NA	intron (NM_028658, intron 1 of 21)	intron (NM_028658, intron 1 of 21)	5850	NM_028658	73825	Mm.271817	NM_028658	ENSMUSG00000034709	Ppp1r21	1110018J12Rik|AI426045|AW550781|Ccdc128|Klraq1	protein phosphatase 1, regulatory subunit 21	protein-coding
upeaks-46320	chr9	96958292	96958576	+	0	NA	intron (NM_145134, intron 2 of 2)	intron (NM_145134, intron 2 of 2)	59921	NM_145134	211949	Mm.491271	NM_145134	ENSMUSG00000046997	Spsb4	D030068E18Rik|SSB-4|Ssb4	splA/ryanodine receptor domain and SOCS box containing 4	protein-coding
upeaks-11104	chr13	3700768	3701088	+	0	NA	Intergenic	Intergenic	66896	NM_178283	142688	Mm.253061	NM_178283	ENSMUSG00000033781	Asb13	2210015B19Rik|6430573K02Rik|Asb-13|C85285	ankyrin repeat and SOCS box-containing 13	protein-coding
upeaks-26496	chr2	148149586	148149837	+	0	NA	Intergenic	Intergenic	-102742	NM_010446	15376	Mm.938	NM_010446	ENSMUSG00000037025	Foxa2	HNF3-beta|HNF3beta|Hnf-3b|Hnf3b|Tcf-3b|Tcf3b	forkhead box A2	protein-coding
upeaks-34133	chr5	54260777	54261025	+	0	NA	Intergenic	Intergenic	-89091	NR_038045	330086	Mm.254449	NM_177871	ENSMUSG00000105912	Gm10440	D130065D13|ENSMUSG00000072936	predicted gene 10440	ncRNA
upeaks-4661	chr10	80332152	80332501	+	0	NA	intron (NM_001204931, intron 1 of 4)	intron (NM_001204931, intron 1 of 4)	2181	NM_139292	70335	Mm.28147	NM_139292	ENSMUSG00000035504	Reep6	0610011M24Rik|Dp1l1	receptor accessory protein 6	protein-coding
upeaks-46447	chr9	102835516	102835715	+	0	NA	intron (NM_001284258, intron 1 of 13)	intron (NM_001284258, intron 1 of 13)	695	NM_013649	20187	Mm.335391	NM_013649	ENSMUSG00000032547	Ryk	AW536699|ERK-3|Vik	receptor-like tyrosine kinase	protein-coding
upeaks-28953	chr3	98267208	98267492	+	0	NA	Intergenic	Intergenic	-13081	NM_008256	15360	Mm.289131	NM_008256	ENSMUSG00000027875	Hmgcs2	1300002P16|mHS	3-hydroxy-3-methylglutaryl-Coenzyme A synthase 2	protein-coding
upeaks-30898	chr4	54838099	54838508	+	0	NA	Intergenic	Intergenic	-109642	NM_172867	242466	Mm.102904	NM_172867	ENSMUSG00000060206	Zfp462	6030417H05|9430078C22Rik|Gt4-2|Zfpip	zinc finger protein 462	protein-coding
upeaks-45605	chr9	63663398	63663648	+	0	NA	intron (NM_016769, intron 5 of 8)	intron (NM_016769, intron 5 of 8)	60868	NM_025857	66939	Mm.34338	NM_025857	ENSMUSG00000037257	Aagab	2310007F21Rik|p34	alpha- and gamma-adaptin binding protein	protein-coding
upeaks-2192	chr1	154090636	154090996	+	0	NA	Intergenic	Intergenic	-110371	NM_001204908	100503355	Mm.484410	NM_001204908	ENSMUSG00000066797	Zfp648	ENSMUSG00000066797|Gm10178|Gm203	zinc finger protein 648	protein-coding
upeaks-23199	chr19	44899139	44899750	+	0	NA	Intergenic	Intergenic	-31675	NM_001081225	226151	Mm.212609	NM_172638	ENSMUSG00000036097	Fam178a	3632432H19|6030443O07Rik|AU014917|Slf2	family with sequence similarity 178, member A	protein-coding
upeaks-3063	chr1	189749967	189750171	+	0	NA	intron (NM_008976, intron 1 of 18)	intron (NM_008976, intron 1 of 18)	21801	NM_008976	19250	Mm.4498	NM_008976	ENSMUSG00000026604	Ptpn14	C130080N23Rik|OTTMUSG00000022087|PTP36	protein tyrosine phosphatase, non-receptor type 14	protein-coding
upeaks-43783	chr8	108913119	108913346	+	0	NA	intron (NM_007496, intron 4 of 9)	B1F|SINE|Alu	-23628	NR_037295	100526511		NR_037295	ENSMUSG00000093241	Mir3108	mir-3108|mmu-mir-3108	microRNA 3108	ncRNA
upeaks-43468	chr8	93854670	93854970	+	0	NA	intron (NM_001113384, intron 2 of 7)	intron (NM_001113384, intron 2 of 7)	-41265	NR_026888	75809	Mm.443272	NM_029449		4930488L21Rik	4930452J22Rik	RIKEN cDNA 4930488L21 gene	ncRNA
upeaks-18367	chr16	85020642	85021002	+	0	NA	intron (NM_007471, intron 9 of 15)	intron (NM_007471, intron 9 of 15)	48611	NR_045889	100038614	Mm.441351	NR_045889		Gm10791	ENSMUSG00000074933	predicted gene 10791	ncRNA
upeaks-43470	chr8	93911962	93912328	+	0	NA	intron (NM_001113384, intron 3 of 7)	intron (NM_001113384, intron 3 of 7)	-98590	NR_026888	75809	Mm.443272	NM_029449		4930488L21Rik	4930452J22Rik	RIKEN cDNA 4930488L21 gene	ncRNA
upeaks-23811	chr2	14604039	14604769	+	0	NA	promoter-TSS (NM_023116)	promoter-TSS (NM_023116)	98	NM_023116	12296	Mm.313930	NM_023116	ENSMUSG00000057914	Cacnb2	AW060387|CAB2|Cavbeta2|Cchb2	calcium channel, voltage-dependent, beta 2 subunit	protein-coding
upeaks-43945	chr8	115719253	115719459	+	0	NA	Intergenic	Intergenic	-12462	NM_001025577	17132	Mm.275549	NM_001025577	ENSMUSG00000055435	Maf	2810401A20Rik|A230108G15Rik|AW047063|c-maf	avian musculoaponeurotic fibrosarcoma oncogene homolog	protein-coding
upeaks-10068	chr12	73884109	73884308	+	0	NA	Intergenic	Intergenic	-17116	NM_001313920	15251	Mm.3879	NM_010431	ENSMUSG00000021109	Hif1a	AA959795|HIF-1-alpha|HIF1-alpha|HIF1alpha|MOP1|bHLHe78	hypoxia inducible factor 1, alpha subunit	protein-coding
upeaks-16163	chr15	75975438	75976062	+	0	NA	TTS (NM_001347040)	TTS (NM_001347040)	6468	NM_001347040	69020	Mm.294295	NM_001081065	ENSMUSG00000034429	Zfp707	1500031N24Rik|AI451708|AW495315	zinc finger protein 707	protein-coding
upeaks-25870	chr2	121949026	121949225	+	0	NA	Intergenic	MT2A|LTR|ERVL	-6876	NM_001290992	329506	Mm.249405	NM_212450	ENSMUSG00000033411	Ctdspl2	D2Ertd485e	CTD (carboxy-terminal domain, RNA polymerase II, polypeptide A) small phosphatase like 2	protein-coding
upeaks-43153	chr8	80858137	80858431	+	0	NA	intron (NM_021356, intron 1 of 9)	ID_B1|SINE|B4	22195	NM_021356	14388	Mm.277409	NM_021356	ENSMUSG00000031714	Gab1	AA408973|AW107238	growth factor receptor bound protein 2-associated protein 1	protein-coding
upeaks-2090	chr1	151177152	151177355	+	0	NA	Intergenic	Intergenic	39219	NR_038011	402734	Mm.337666	NR_038011		C730036E19Rik	lncLSTR	RIKEN cDNA C730036E19 gene	ncRNA
upeaks-16401	chr15	80191671	80191874	+	0	NA	intron (NM_010795, intron 1 of 1)	intron (NM_010795, intron 1 of 1)	18051	NM_010795	17309	Mm.299693	NM_010795	ENSMUSG00000042428	Mgat3	1110038J12Rik|AI848272|GnT-III	mannoside acetylglucosaminyltransferase 3	protein-coding
upeaks-3469	chr10	17600357	17600598	+	0	NA	Intergenic	Intergenic	-122751	NM_010828	17684	Mm.272321	NM_010828	ENSMUSG00000039910	Cited2	AI835299|ER154-like|Mrg1|Msg2|p35srj	Cbp/p300-interacting transactivator, with Glu/Asp-rich carboxy-terminal domain, 2	protein-coding
upeaks-39182	chr7	18057669	18057935	+	0	NA	Intergenic	ERVB5_1-LTR_MM|LTR|ERVK	-8127	NM_026087	67315	Mm.46089	NM_026087	ENSMUSG00000030366	Ceacam12	1600031J20Rik|Ceacam12-C1|Ceacam12-C3|Ceacam12C1|Ceacam12C3	carcinoembryonic antigen-related cell adhesion molecule 12	protein-coding
upeaks-21686	chr18	62786912	62787111	+	0	NA	Intergenic	MLTR14|LTR|ERV1	-30664	NR_037693	78449	Mm.262195	NR_037693	ENSMUSG00000041789	2700046A07Rik	A330042I05Rik	RIKEN cDNA 2700046A07 gene	ncRNA
upeaks-44426	chr9	3022060	3022293	+	0	NA	Intergenic	GSAT_MM|Satellite|Satellite	16567	NR_039546	100628572		NR_039546	ENSMUSG00000106183	Mir101c	mir-101c|mmu-mir-101c	microRNA 101c	ncRNA
upeaks-34252	chr5	66114310	66114557	+	0	NA	intron (NM_001127382, intron 2 of 7)	intron (NM_001127382, intron 2 of 7)	-16254	NM_139065	245945	Mm.36863	NM_139065	ENSMUSG00000070780	Rbm47	9530077J19Rik	RNA binding motif protein 47	protein-coding
upeaks-26641	chr2	152828158	152828362	+	0	NA	intron (NM_001289717, intron 2 of 2)	intron (NM_001289717, intron 2 of 2)	2457	NM_001289716	12048	Mm.238213	NM_009743	ENSMUSG00000007659	Bcl2l1	Bcl(X)L|Bcl-XL|Bcl2l|BclX|bcl-x|bcl2-L-1	BCL2-like 1	protein-coding
upeaks-23267	chr19	46462665	46462896	+	0	NA	intron (NM_001025391, intron 8 of 11)	MTD|LTR|ERVL-MaLR	-38868	NM_053100	93679	Mm.392177	NM_053100	ENSMUSG00000025034	Trim8	AA408830|BB006755|GERP|Rnf27	tripartite motif-containing 8	protein-coding
upeaks-10771	chr12	107338854	107339142	+	0	NA	Intergenic	Intergenic	396490	NR_045973	74968	Mm.359821	NR_045973	ENSMUSG00000085641	4930465M20Rik	4930431H15Rik	RIKEN cDNA 4930465M20 gene	ncRNA
upeaks-22725	chr19	24266211	24266534	+	0	NA	intron (NM_008044, intron 4 of 4)	intron (NM_008044, intron 4 of 4)	14214	NM_008044	14297	Mm.7319	NM_008044	ENSMUSG00000059363	Fxn	FA|FARR|Frda|X25	frataxin	protein-coding
upeaks-25001	chr2	72980331	72980936	+	0	NA	promoter-TSS (NM_001018042)	promoter-TSS (NM_001018042)	-187	NM_001018042	20687	Mm.124328	NM_011450	ENSMUSG00000027109	Sp3	D130027J01Rik	trans-acting transcription factor 3	protein-coding
upeaks-14556	chr14	70353423	70353814	+	0	NA	Intergenic	Intergenic	-2194	NM_001135151	213053	Mm.270647	NM_144808	ENSMUSG00000022094	Slc39a14	FAD-123|ZIP-14|Zip14|fad123	solute carrier family 39 (zinc transporter), member 14	protein-coding
upeaks-42014	chr8	10965821	10966022	+	0	NA	Intergenic	Intergenic	-37464	NR_135302	665306	Mm.358758	NR_030715	ENSMUSG00000038917	3930402G23Rik	-	RIKEN cDNA 3930402G23 gene	ncRNA
upeaks-41165	chr7	120189425	120189680	+	0	NA	intron (NM_016669, intron 7 of 7)	MIRb|SINE|MIR	12436	NM_016669	12971	Mm.9114	NM_016669	ENSMUSG00000030905	Crym	-	crystallin, mu	protein-coding
upeaks-36147	chr5	148598407	148598675	+	0	NA	Intergenic	Intergenic	-45753	NM_011908	24109	Mm.21846	NM_011908	ENSMUSG00000001687	Ubl3	AW108023|HCG	ubiquitin-like 3	protein-coding
upeaks-2087	chr1	151153226	151153681	+	0	NA	Intergenic	Intergenic	15419	NR_038011	402734	Mm.337666	NR_038011		C730036E19Rik	lncLSTR	RIKEN cDNA C730036E19 gene	ncRNA
upeaks-12958	chr13	103225322	103225581	+	0	NA	intron (NM_175171, intron 1 of 28)	intron (NM_175171, intron 1 of 28)	109041	NM_175171	328329	Mm.202606	NM_175171	ENSMUSG00000034751	Mast4	4930420O11Rik|AI642422|mKIAA0303	microtubule associated serine/threonine kinase family member 4	protein-coding
upeaks-21362	chr18	44498108	44498640	+	0	NA	intron (NM_001085374, intron 4 of 16)	intron (NM_001085374, intron 4 of 16)	117874	NM_027490	70640	Mm.87629	NM_027490	ENSMUSG00000024472	Dcp2	2410015D23Rik|5730537H01Rik|AL118268	decapping mRNA 2	protein-coding
upeaks-5407	chr10	116350621	116350879	+	0	NA	intron (NM_029928, intron 17 of 31)	intron (NM_029928, intron 17 of 31)	49376	NM_029928	19263	Mm.37213	NM_029928	ENSMUSG00000020154	Ptprb	3230402H02Rik|C130094E24|Ptpz|Rptpb|VE-PTP|Veptp	protein tyrosine phosphatase, receptor type, B	protein-coding
upeaks-10902	chr12	111587402	111587603	+	0	NA	intron (NM_022801, intron 1 of 15)	intron (NM_022801, intron 1 of 15)	12992	NM_022801	17169	Mm.260504	NM_021516	ENSMUSG00000007411	Mark3	1600015G02Rik|A430080F22Rik|C-TAK1|ETK-1|ETK1|Emk2|MPK10	MAP/microtubule affinity regulating kinase 3	protein-coding
upeaks-47469	chrX	72953422	72953685	+	0	NA	intron (NM_010941, intron 5 of 7)	intron (NM_010941, intron 5 of 7)	-33786	NM_009549	22673	Mm.1161	NM_009549	ENSMUSG00000031351	Zfp185	P1|Znf185	zinc finger protein 185	protein-coding
upeaks-7344	chr11	71986190	71986614	+	0	NA	Intergenic	Intergenic	-46280	NR_045942	73816	Mm.390391	NR_045942	ENSMUSG00000085528	4930401O10Rik	-	RIKEN cDNA 4930401O10 gene	ncRNA
upeaks-47723	chrX	106164635	106164895	+	0	NA	Intergenic	Intergenic	21490	NM_205820	279572	Mm.336203	NM_205820	ENSMUSG00000033777	Tlr13	AI666735|Gm713	toll-like receptor 13	protein-coding
upeaks-15451	chr15	25743540	25743816	+	0	NA	intron (NM_019472, intron 18 of 40)	intron (NM_019472, intron 18 of 40)	-99620	NM_001034851	66270	Mm.25311	NM_025459	ENSMUSG00000022270	Fam134b	1810015C04Rik|AU015349	family with sequence similarity 134, member B	protein-coding
upeaks-17859	chr16	36087725	36088180	+	0	NA	intron (NM_198645, intron 3 of 4)	intron (NM_198645, intron 3 of 4)	6677	NM_001159422	381045	Mm.310434	NM_198645	ENSMUSG00000075229	Ccdc58	A930007B11Rik|AI413631	coiled-coil domain containing 58	protein-coding
upeaks-8741	chr11	113636713	113636934	+	0	NA	Intergenic	ID_B1|SINE|B4	-12706	NM_013581	16834	Mm.261620	NM_013581	ENSMUSG00000018661	Cog1	6030445I15|Ldlb|mKIAA1381	component of oligomeric golgi complex 1	protein-coding
upeaks-1728	chr1	129562839	129563055	+	0	NA	intron (NM_172485, intron 2 of 27)	intron (NM_172485, intron 2 of 27)	289643	NM_172485	210417	Mm.380518	NM_172485	ENSMUSG00000042581	Thsd7b	1700074E13Rik|B930082A18|D130067I03Rik	thrombospondin, type I, domain containing 7B	protein-coding
upeaks-15797	chr15	52297934	52298293	+	0	NA	intron (NM_172816, intron 1 of 7)	intron (NM_172816, intron 1 of 7)	2560	NM_172816	239436	Mm.208831	NM_172816	ENSMUSG00000022315	Slc30a8	C820002P14Rik|ZnT-8|ZnT8	solute carrier family 30 (zinc transporter), member 8	protein-coding
upeaks-38455	chr6	129175716	129175969	+	0	NA	Intergenic	Intergenic	-4773	NM_053109	93694	Mm.197536	NM_053109	ENSMUSG00000030157	Clec2d	Clr-b|Clrb|Ocil	C-type lectin domain family 2, member d	protein-coding
upeaks-47691	chrX	103581757	103582138	+	0	NA	intron (NR_028380, intron 10 of 10)	intron (NR_028380, intron 10 of 10)	-8793	NR_030418	751546		NR_030418	ENSMUSG00000076269	Mir374b	Mir374|Mirn374|mir-374b|mmu-mir-374|mmu-mir-374b	microRNA 374b	ncRNA
upeaks-7956	chr11	93657771	93657986	+	0	NA	Intergenic	Intergenic	227888	NM_001013375	217109	Mm.379350	NM_001013375	ENSMUSG00000054079	Utp18	6230425C22Rik|6430513M13|Wdr50	UTP18 small subunit processome component	protein-coding
upeaks-1674	chr1	126543600	126543967	+	0	NA	intron (NM_001081756, intron 2 of 16)	intron (NM_001081756, intron 2 of 16)	-50856	NM_172484	210356	Mm.377234	NM_172484	ENSMUSG00000049690	Nckap5	8430408F21|D130011D22Rik|E030049G20Rik|Erih1|Erih2|Gm1548|Nap5	NCK-associated protein 5	protein-coding
upeaks-17516	chr16	21210524	21211229	+	0	NA	intron (NM_010143, intron 1 of 15)	intron (NM_010143, intron 1 of 15)	6081	NM_010143	13845	Mm.6972	NM_010143	ENSMUSG00000005958	Ephb3	AW456895|Cek10|Etk2|HEK2|MDK5|Sek4|Tyro6	Eph receptor B3	protein-coding
upeaks-29291	chr3	115641400	115641803	+	0	NA	Intergenic	Lx8|LINE|L1	73454	NM_007901	13609	Mm.982	NM_007901	ENSMUSG00000045092	S1pr1	AI849002|Edg1|Lpb1|S1p|S1p1	sphingosine-1-phosphate receptor 1	protein-coding
upeaks-44275	chr8	123973546	123973852	+	0	NA	intron (NM_019552, intron 1 of 12)	intron (NM_019552, intron 1 of 12)	9423	NM_019552	56199	Mm.274243	NM_019552	ENSMUSG00000031974	Abcb10	Abc-me|Abcb12	ATP-binding cassette, sub-family B (MDR/TAP), member 10	protein-coding
upeaks-15323	chr15	8266045	8266250	+	0	NA	intron (NM_001162906, intron 51 of 52)	intron (NM_001162906, intron 51 of 52)	97041	NM_001162906	73692	Mm.164436	NM_001162906	ENSMUSG00000039801	2410089E03Rik	4732468D17Rik|Hug|Jbts17|b2b012Clo	RIKEN cDNA 2410089E03 gene	protein-coding
upeaks-12482	chr13	73709608	73709828	+	0	NA	3' UTR (NM_027780, exon 2 of 2)	3' UTR (NM_027780, exon 2 of 2)	-9023	NM_028878	74338	Mm.271635	NM_028878	ENSMUSG00000021565	Slc6a19	4632401C08Rik|B<0>AT1	solute carrier family 6 (neurotransmitter transporter), member 19	protein-coding
upeaks-2848	chr1	180952449	180952785	+	0	NA	intron (NM_144794, intron 4 of 22)	L2c|LINE|L2	10099	NM_144794	208795	Mm.185518	NM_144794	ENSMUSG00000026519	Tmem63a	BC014795|Tmem64a	transmembrane protein 63a	protein-coding
upeaks-8508	chr11	105408030	105408258	+	0	NA	intron (NM_001039242, intron 5 of 5)	intron (NM_001039242, intron 5 of 5)	48591	NM_172568	632687	Mm.121570	NM_172568	ENSMUSG00000078627	2018-03-10	4933417C16Rik|AV039223|OTTMUSG00000002847|Rnf190	membrane-associated ring finger (C3HC4) 10	protein-coding
upeaks-16083	chr15	73038701	73038919	+	0	NA	intron (NM_180662, intron 4 of 21)	L1MB8|LINE|L1	17002	NM_029640	76510	Mm.158902	NM_029640	ENSMUSG00000047921	Trappc9	1810044A24Rik|2900005P22Rik|4632408O18Rik|Ibp|Nibp|TRS130|mKIAA1882	trafficking protein particle complex 9	protein-coding
upeaks-9152	chr12	3719333	3719532	+	0	NA	intron (NR_027869, intron 10 of 20)	MER5A|DNA|hAT-Charlie	-87548	NM_007872	13435	Mm.5001	NM_007872	ENSMUSG00000020661	Dnmt3a	MmuIIIA	DNA methyltransferase 3A	protein-coding
upeaks-32148	chr4	125610084	125610283	+	0	NA	intron (NM_001081097, intron 1 of 15)	L1MC1|LINE|L1	105434	NR_035409	100124641		NR_035409	ENSMUSG00000076033	Mir692-3	Mir692-2b|Mirn692-2b|mmu-mir-692-3	microRNA 692-3	ncRNA
upeaks-29643	chr3	132398947	132399303	+	0	NA	Intergenic	Intergenic	-231066	NM_001270430	433653		NM_001270430	ENSMUSG00000091721	Gimd1	EG433653|Gm5549	GIMAP family P-loop NTPase domain containing 1	protein-coding
upeaks-5188	chr10	103346782	103347170	+	0	NA	Intergenic	MLTR18B_MM|LTR|ERVK	-20832	NM_001252330	103098	Mm.458408	NM_175328	ENSMUSG00000019894	Slc6a15	AA536730|AI326450|AI326451|v7-3	solute carrier family 6 (neurotransmitter transporter), member 15	protein-coding
upeaks-12531	chr13	75797720	75798204	+	0	NA	Intergenic	Intergenic	-41924	NM_053108	93692	Mm.25844	NM_053108	ENSMUSG00000021591	Glrx	C86710|D13Wsu156e|Glrx1|Grx1|TTase	glutaredoxin	protein-coding
upeaks-9149	chr12	3536013	3536213	+	0	NA	Intergenic	RLTR1D|LTR|ERV1	-36278	NR_027869	13528	Mm.286202	NM_007886	ENSMUSG00000071454	Dtnb	-	dystrobrevin, beta	protein-coding
upeaks-2359	chr1	162083968	162084167	+	0	NA	exon (NM_172646, exon 16 of 20)	exon (NM_172646, exon 16 of 20)	79098	NR_040562	72753	Mm.452125	NR_040562	ENSMUSG00000090260	2810442N19Rik	-	RIKEN cDNA 2810442N19 gene	ncRNA
upeaks-41933	chr8	5965741	5965967	+	0	NA	Intergenic	Intergenic	-860567	NM_011388	20494	Mm.3500	NM_011388	ENSMUSG00000023073	Slc10a2	9130221J18Rik|AI605518|ASBT|IBAT|ISBT	solute carrier family 10, member 2	protein-coding
upeaks-46461	chr9	103141980	103142281	+	0	NA	intron (NM_173781, intron 2 of 7)	RLTR1D|LTR|ERV1	30056	NM_173781	270192	Mm.490252	NM_173781	ENSMUSG00000032549	Rab6b	9630015C03|AI844641|C330006L04Rik|D9Bwg0185e	RAB6B, member RAS oncogene family	protein-coding
upeaks-25480	chr2	103477527	103477787	+	0	NA	intron (NM_009804, intron 1 of 12)	intron (NM_009804, intron 1 of 12)	7496	NM_009804	12359	Mm.4215	NM_009804	ENSMUSG00000027187	Cat	2210418N07|Cas-1|Cas1|Cs-1	catalase	protein-coding
upeaks-30283	chr4	6692364	6692722	+	0	NA	intron (NM_145711, intron 7 of 8)	intron (NM_145711, intron 7 of 8)	-238272	NM_010945	18201	Mm.3059	NM_010945	ENSMUSG00000028245	Nsmaf	AA959567|C630007J05|Fan	neutral sphingomyelinase (N-SMase) activation associated factor	protein-coding
upeaks-25773	chr2	118782432	118782657	+	0	NA	intron (NM_170593, intron 1 of 7)	intron (NM_170593, intron 1 of 7)	2825	NM_170593	214240	Mm.221499	NM_170593	ENSMUSG00000040035	Disp2	AI840597|B230210L08Rik|DispB|mKIAA1742	dispatched RND tramsporter family member 2	protein-coding
upeaks-6521	chr11	42421187	42421448	+	0	NA	promoter-TSS (NM_001347314)	promoter-TSS (NM_001347314)	-33	NM_001347314	14401	Mm.338723	NM_008070	ENSMUSG00000007653	Gabrb2	AI834970|C030002O17Rik|C030021G16Rik|Gabrab2|Gabrb-2	gamma-aminobutyric acid (GABA) A receptor, subunit beta 2	protein-coding
upeaks-1546	chr1	107748781	107749038	+	0	NA	Intergenic	Intergenic	158903	NM_001159748	20725	Mm.83909	NM_011459	ENSMUSG00000026315	Serpinb8	CAP-2|CAP2|NK10|Spi8|ovalbumin	serine (or cysteine) peptidase inhibitor, clade B, member 8	protein-coding
upeaks-27708	chr3	21986477	21986795	+	0	NA	Intergenic	Intergenic	-90016	NM_030732	81004	Mm.202966	NM_030732	ENSMUSG00000027630	Tbl1xr1	8030499H02Rik|A630076E03Rik|AW539987|C21|C230089I12Rik|DC42|Ira1|TBLR1	transducin (beta)-like 1X-linked receptor 1	protein-coding
upeaks-30513	chr4	28783982	28784464	+	0	NA	Intergenic	GA-rich|Low_complexity|Low_complexity	-28908	NM_010141	13841	Mm.257266	NM_010141	ENSMUSG00000028289	Epha7	Cek11|Ebk|Ehk3|Hek11|Mdk1	Eph receptor A7	protein-coding
upeaks-15003	chr14	106394037	106394236	+	0	NA	Intergenic	Intergenic	92384	NR_045938	73631	Mm.48862	NR_045938	ENSMUSG00000099794	1700128A07Rik	-	RIKEN cDNA 1700128A07 gene	ncRNA
upeaks-16319	chr15	78831330	78831544	+	0	NA	Intergenic	Intergenic	-11210	NM_027219	104445	Mm.307488	NM_027219	ENSMUSG00000049521	Cdc42ep1	1810058K22Rik|AA980734|Borg5|CEP1|MSE55	CDC42 effector protein (Rho GTPase binding) 1	protein-coding
upeaks-36388	chr6	12581393	12581592	+	0	NA	intron (NM_001164805, intron 1 of 26)	intron (NM_001164805, intron 1 of 26)	167761	NM_001164805	330267	Mm.11989	NM_001164805	ENSMUSG00000032625	Thsd7a	Gm837	thrombospondin, type I, domain containing 7A	protein-coding
upeaks-15273	chr15	5869320	5869561	+	0	NA	Intergenic	Intergenic	373122	NR_045274	71432	Mm.291087	NR_045274		5430437J10Rik	-	RIKEN cDNA 5430437J10 gene	ncRNA
upeaks-44352	chr8	126614064	126614419	+	0	NA	Intergenic	Intergenic	-20805	NM_001164598	270110	Mm.334918	NM_001164598	ENSMUSG00000051495	Irf2bp2	E130305N23Rik|IRF-2BP2	interferon regulatory factor 2 binding protein 2	protein-coding
upeaks-45780	chr9	67817919	67818150	+	0	NA	Intergenic	Intergenic	14296	NM_001163143	244911	Mm.325849	NM_001163143	ENSMUSG00000047990	C2cd4a	EG244911|Fam148a	C2 calcium-dependent domain containing 4A	protein-coding
upeaks-24751	chr2	59706918	59707164	+	0	NA	intron (NM_198294, intron 3 of 26)	intron (NM_198294, intron 3 of 26)	60272	NM_001290659	66860	Mm.27917	NM_198294	ENSMUSG00000035168	Tanc1	1200003E16Rik|Tanc|mKIAA1728	tetratricopeptide repeat, ankyrin repeat and coiled-coil containing 1	protein-coding
upeaks-5393	chr10	115847022	115847275	+	0	NA	intron (NM_146010, intron 7 of 7)	intron (NM_146010, intron 7 of 7)	29864	NM_001168679	216350	Mm.22270	NM_146010	ENSMUSG00000034127	Tspan8	C76990|E330007O21Rik|Tm4sf3	tetraspanin 8	protein-coding
upeaks-42259	chr8	25107533	25107852	+	0	NA	Intergenic	Intergenic	-5881	NM_031257	83436	Mm.261122	NM_031257	ENSMUSG00000031557	Plekha2	6430512N22Rik|AI851530|AU041791|TAPP2|W91773	pleckstrin homology domain-containing, family A (phosphoinositide binding specific) member 2	protein-coding
upeaks-20954	chr18	20757540	20757739	+	0	NA	Intergenic	Intergenic	-11235	NM_019737	56386	Mm.393827	NM_019737	ENSMUSG00000056124	B4galt6	AA536803|AU022389	UDP-Gal:betaGlcNAc beta 1,4-galactosyltransferase, polypeptide 6	protein-coding
upeaks-34811	chr5	104359264	104359618	+	0	NA	Intergenic	Intergenic	34112	NM_053172	94111	Mm.196672	NM_053172	ENSMUSG00000053863	Mepe	Of45	matrix extracellular phosphoglycoprotein with ASARM motif (bone)	protein-coding
upeaks-32151	chr4	125838838	125839217	+	0	NA	Intergenic	Intergenic	83283	NR_015560	72395	Mm.112888	NR_015560	ENSMUSG00000085562	2610028E06Rik	BB043107	RIKEN cDNA 2610028E06 gene	ncRNA
upeaks-42221	chr8	23198453	23198679	+	0	NA	intron (NM_018743, intron 1 of 12)	intron (NM_018743, intron 1 of 12)	9887	NM_018743	102247	Mm.200898	NM_018743	ENSMUSG00000031545	Gpat4	AU041707|AW545732|Agpat6|Tsarg7	glycerol-3-phosphate acyltransferase 4	protein-coding
upeaks-10065	chr12	73790755	73791094	+	0	NA	Intergenic	Intergenic	-110400	NM_001313920	15251	Mm.3879	NM_010431	ENSMUSG00000021109	Hif1a	AA959795|HIF-1-alpha|HIF1-alpha|HIF1alpha|MOP1|bHLHe78	hypoxia inducible factor 1, alpha subunit	protein-coding
upeaks-10694	chr12	103827940	103828399	+	0	NA	Intergenic	Intergenic	35450	NM_009243	20700	Mm.439692	NM_009243	ENSMUSG00000066366	Serpina1a	Aat-2|Aat2|Dom1|PI1|Spi1-1|Spi1-3	serine (or cysteine) peptidase inhibitor, clade A, member 1A	protein-coding
upeaks-5289	chr10	110600099	110600986	+	0	NA	promoter-TSS (NR_028438)	promoter-TSS (NR_028438)	-108	NR_028438	109335	Mm.367727	NR_028438		9230102K24Rik	-	RIKEN cDNA 9230102K24 gene	ncRNA
upeaks-23191	chr19	44741425	44741805	+	0	NA	Intergenic	CpG	-15779	NM_011037	18504	Mm.192158	NM_011037	ENSMUSG00000004231	Pax2	Opdc|Pax-2	paired box 2	protein-coding
upeaks-28331	chr3	68454244	68454443	+	0	NA	intron (NM_001113420, intron 1 of 6)	intron (NM_001113420, intron 1 of 6)	-13840	NM_001282045	30953	Mm.331064	NM_013928	ENSMUSG00000027777	Schip1	Nf2ip|Schip-1	schwannomin interacting protein 1	protein-coding
upeaks-27553	chr3	5860264	5860867	+	0	NA	Intergenic	LSU-rRNA_Hsa|rRNA|rRNA	-284317	NM_001163306	19302	Mm.132336	NM_008994	ENSMUSG00000040374	Pex2	D3Ertd138e|PAF-1|PMP35|Pxmp3	peroxisomal biogenesis factor 2	protein-coding
upeaks-15225	chr14	123110542	123110858	+	0	NA	Intergenic	Intergenic	-57803	NR_045145	380934	Mm.393838	NR_045143		AA536875	Gm1591	expressed sequence AA536875	ncRNA
upeaks-6912	chr11	58804501	58804800	+	0	NA	Intergenic	Intergenic	-2690	NM_001162878	75429	Mm.296819	NM_029283	ENSMUSG00000049154	Fam183b	3100002J23Rik|Theg6	family with sequence similarity 183, member B	protein-coding
upeaks-587	chr1	50652329	50652528	+	0	NA	Intergenic	Intergenic	-275095	NM_019790	56363	Mm.245154	NM_019790	ENSMUSG00000026109	Tmeff2	4832418D20Rik|7630402F16Rik|TR-2	transmembrane protein with EGF-like and two follistatin-like domains 2	protein-coding
upeaks-25437	chr2	101827615	101828052	+	0	NA	intron (NM_001110849, intron 2 of 9)	intron (NM_001110849, intron 2 of 9)	11147	NM_001110849	72446	Mm.24138	NM_175181	ENSMUSG00000032841	Prr5l	2600010E01Rik|4833411O04Rik|Protor-2|Protor2	proline rich 5 like	protein-coding
upeaks-12840	chr13	97511051	97511360	+	0	NA	Intergenic	MLT1C|LTR|ERVL-MaLR	28504	NR_110431	100039691	Mm.219358	NR_110430	ENSMUSG00000078952	Lncenc1	ENSMUSG00000078952|Gm11019|Gm2373|Lincenc1|Platr18|linc-Enc1	long non-coding RNA, embryonic stem cells expressed 1	ncRNA
upeaks-20950	chr18	20648716	20649290	+	0	NA	Intergenic	MTD|LTR|ERVL-MaLR	-16247	NM_013697	22139	Mm.2108	NM_013697	ENSMUSG00000061808	Ttr	AA408768|AI787086|D17860|prealbumin	transthyretin	protein-coding
upeaks-42213	chr8	22873810	22874203	+	0	NA	intron (NM_001081149, intron 3 of 17)	intron (NM_001081149, intron 3 of 17)	14467	NM_001081149	244349	Mm.182776	NM_001081149	ENSMUSG00000031540	Kat6a	1500036M03|9930021N24Rik|MOZ|Myst3|Zfp220	K(lysine) acetyltransferase 6A	protein-coding
upeaks-31143	chr4	69982666	69983009	+	0	NA	Intergenic	Intergenic	427598	NM_001313762	214444	Mm.370777	NM_145990	ENSMUSG00000039298	Cdk5rap2	2900018K03Rik|an|mKIAA1633	CDK5 regulatory subunit associated protein 2	protein-coding
upeaks-18680	chr16	97236081	97236333	+	0	NA	Intergenic	LTRIS2|LTR|ERV1	-65472	NM_031174	13508	Mm.102437	NM_031174	ENSMUSG00000050272	Dscam	4932410A21Rik	Down syndrome cell adhesion molecule	protein-coding
upeaks-43031	chr8	72571876	72572181	+	0	NA	promoter-TSS (NM_172396)	promoter-TSS (NM_172396)	-75	NM_144534	74166	Mm.212927	NM_144534	ENSMUSG00000031791	Tmem38a	1110001E17Rik|AI413399|TRIC-A|mg33a	transmembrane protein 38A	protein-coding
upeaks-6848	chr11	55409950	55410152	+	0	NA	intron (NM_001290817, intron 1 of 9)	intron (NM_001290817, intron 1 of 9)	10029	NM_001290817	20692	Mm.291442	NM_009242	ENSMUSG00000018593	Sparc	BM-40|ON	secreted acidic cysteine rich glycoprotein	protein-coding
upeaks-47034	chr9	122022609	122023173	+	0	NA	Intergenic	Intergenic	-26865	NM_153540	215494	Mm.402151	NM_153540	ENSMUSG00000066235	Pomgnt2	Ago61|C85492|Gtdc2	protein O-linked mannose beta 1,4-N-acetylglucosaminyltransferase 2	protein-coding
upeaks-31197	chr4	78600059	78600451	+	0	NA	Intergenic	Lx|LINE|L1	6208	NR_131142	623726		NR_131142		A430085M09Rik	EG623726	RIKEN cDNA A430085M09 gene	ncRNA
upeaks-28423	chr3	79989947	79990181	+	0	NA	Intergenic	Intergenic	104134	NM_133187	68659	Mm.427274	NM_133187	ENSMUSG00000027955	Fam198b	1110032E23Rik|2210419I08Rik|AV011458|Ened	family with sequence similarity 198, member B	protein-coding
upeaks-31435	chr4	95898856	95899395	+	0	NA	intron (NM_001113412, intron 14 of 15)	intron (NM_001113412, intron 14 of 15)	67910	NR_045777	319247	Mm.473527	NM_175680	ENSMUSG00000044125	9530080O11Rik	-	RIKEN cDNA 9530080O11 gene	ncRNA
upeaks-8263	chr11	100159535	100159734	+	0	NA	Intergenic	RLTR40|LTR|ERVK	-13708	NM_008471	16669	Mm.439699	NM_008471	ENSMUSG00000020911	Krt19	AI663979|CK-19|EndoC|K19|Krt-1.19|Krt1-19	keratin 19	protein-coding
upeaks-16790	chr15	95838457	95838763	+	0	NA	intron (NM_001253813, intron 2 of 20)	intron (NM_001253813, intron 2 of 20)	47767	NM_175344	105722	Mm.38087	NM_175344	ENSMUSG00000064210	Ano6	2900059G15Rik|AA407480|AW554778|F730003B03Rik|Tmem16f	anoctamin 6	protein-coding
upeaks-23017	chr19	38135468	38135711	+	0	NA	intron (NM_033614, intron 1 of 21)	C-rich|Low_complexity|Low_complexity	2808	NM_033614	110855	Mm.450141	NM_033614	ENSMUSG00000024992	Pde6c	cpfl1	phosphodiesterase 6C, cGMP specific, cone, alpha prime	protein-coding
upeaks-1299	chr1	87394628	87394877	+	0	NA	promoter-TSS (NM_001110227)	promoter-TSS (NM_001110227)	-23	NM_001110227	100040591	Mm.443539	NM_001110227	ENSMUSG00000079436	Kcnj13	-	potassium inwardly-rectifying channel, subfamily J, member 13	protein-coding
upeaks-12680	chr13	90108684	90108995	+	0	NA	3' UTR (NM_025335, exon 4 of 4)	3' UTR (NM_025335, exon 4 of 4)	19172	NM_025335	66074	Mm.241387	NM_025335	ENSMUSG00000012422	Tmem167	0610041E09Rik|5730424F14Rik|AU041184|AW537806|ENSMUSG00000060669|Gm10085|Tmem167a	transmembrane protein 167	protein-coding
upeaks-42026	chr8	11308419	11309037	+	0	NA	intron (NR_133670, intron 1 of 52)	intron (NR_133670, intron 1 of 52)	-4077	NM_009932	12827	Mm.181021	NM_009932	ENSMUSG00000031503	Col4a2	Col4a-2	collagen, type IV, alpha 2	protein-coding
upeaks-38166	chr6	120251040	120251289	+	0	NA	intron (NM_198884, intron 1 of 19)	intron (NM_198884, intron 1 of 19)	43395	NM_198884	330406	Mm.321840	NM_198884	ENSMUSG00000041372	B4galnt3	AB114826|B4GalNAcT3|C330047A21	beta-1,4-N-acetyl-galactosaminyl transferase 3	protein-coding
upeaks-9001	chr11	118729496	118729697	+	0	NA	intron (NM_001039168, intron 2 of 14)	intron (NM_001039168, intron 2 of 14)	31445	NM_001285438	52897	Mm.341103	NM_001024931	ENSMUSG00000025576	Rbfox3	Fox-3|Hrnbp3|NeuN|Neuna60	RNA binding protein, fox-1 homolog (C. elegans) 3	protein-coding
upeaks-2611	chr1	171269971	171270827	+	0	NA	promoter-TSS (NM_020579)	promoter-TSS (NM_020579)	71	NM_020579	57370	Mm.274011	NM_020579	ENSMUSG00000052423	B4galt3	9530061M23Rik|AA104562|AW125175|ESTM26|ESTM6|R74981	UDP-Gal:betaGlcNAc beta 1,4-galactosyltransferase, polypeptide 3	protein-coding
upeaks-16540	chr15	84186305	84186741	+	0	NA	3' UTR (NM_054088, exon 8 of 8)	3' UTR (NM_054088, exon 8 of 8)	-5710	NM_178614	68653	Mm.290725	NM_178614	ENSMUSG00000022437	Samm50	1110030L07Rik	SAMM50 sorting and assembly machinery component	protein-coding
upeaks-42773	chr8	61713310	61713566	+	0	NA	intron (NM_001081390, intron 3 of 19)	intron (NM_001081390, intron 3 of 19)	46660	NM_001293773	72333	Mm.29933	NM_001081390	ENSMUSG00000058056	Palld	2410003B16Rik|6030492A02	palladin, cytoskeletal associated protein	protein-coding
upeaks-1123	chr1	80218160	80218668	+	0	NA	Intergenic	Intergenic	-4470	NM_173425	241128	Mm.145511	NM_173425	ENSMUSG00000043230	Fam124b	A830043J08Rik	family with sequence similarity 124, member B	protein-coding
upeaks-10245	chr12	80594224	80594453	+	0	NA	intron (NM_001081421, intron 12 of 14)	intron (NM_001081421, intron 12 of 14)	49773	NM_001347409	13877	Mm.246551	NM_007951	ENSMUSG00000021131	Erh	Mer|Prei1	enhancer of rudimentary homolog (Drosophila)	protein-coding
upeaks-22924	chr19	34210907	34211174	+	0	NA	intron (NM_029682, intron 1 of 10)	intron (NM_029682, intron 1 of 10)	18770	NM_029682	76630	Mm.130952	NM_029682	ENSMUSG00000024776	Stambpl1	1700095N21Rik|8230401J17Rik|ALMalpha|AMSH-FP	STAM binding protein like 1	protein-coding
upeaks-4120	chr10	58405390	58405685	+	0	NA	intron (NM_001346676, intron 2 of 9)	intron (NM_001346676, intron 2 of 9)	11164	NM_001193303	110829	Mm.57734	NM_026148	ENSMUSG00000019920	Lims1	2310016J22Rik|4921524A02Rik|AI507642|AU021743|AW551584|C430041B13Rik|Lims1l|PINCH|PINCH1	LIM and senescent cell antigen-like domains 1	protein-coding
upeaks-8146	chr11	97585963	97586221	+	0	NA	Intergenic	Intergenic	-10966	NM_018873	56013	Mm.342665	NM_018873	ENSMUSG00000038453	Srcin1	P140|SNIP|mKIAA1684|p140Cap	SRC kinase signaling inhibitor 1	protein-coding
upeaks-42080	chr8	13060787	13061125	+	0	NA	promoter-TSS (NM_025834)	promoter-TSS (NM_025834)	48	NM_025834	66901	Mm.441140	NM_025834	ENSMUSG00000031445	Proz	1300015B06Rik	protein Z, vitamin K-dependent plasma glycoprotein	protein-coding
upeaks-1078	chr1	77468976	77469307	+	0	NA	intron (NM_007936, intron 3 of 17)	intron (NM_007936, intron 3 of 17)	27627	NR_105770	102465180		NR_105770	ENSMUSG00000099141	Mir6352	Gm27481|mmu-mir-6352	microRNA 6352	ncRNA
upeaks-34154	chr5	63649092	63649391	+	0	NA	5' UTR (NM_177006, exon 1 of 7)	5' UTR (NM_177006, exon 1 of 7)	138	NM_177006	319807	Mm.319487	NM_028470	ENSMUSG00000090061	Nwd2	3110047P20Rik|B830017A01Rik|Hn1-ps2|mKIAA1239	NACHT and WD repeat domain containing 2	protein-coding
upeaks-10486	chr12	89822231	89822435	+	0	NA	intron (NM_001252074, intron 1 of 6)	intron (NM_001252074, intron 1 of 6)	9850	NM_001252074	18191	Mm.425766	NM_172544	ENSMUSG00000066392	Nrxn3	-	neurexin III	protein-coding
upeaks-20930	chr18	16809262	16809621	+	0	NA	promoter-TSS (NM_007664)	promoter-TSS (NM_007664)	-195	NM_007664	12558	Mm.257437	NM_007664	ENSMUSG00000024304	Cdh2	CDHN|N-CAD|Ncad	cadherin 2	protein-coding
upeaks-44369	chr8	126900267	126900494	+	0	NA	Intergenic	Intergenic	45541	NM_024214	67952	Mm.6932	NM_024214	ENSMUSG00000093904	Tomm20	1810060K07Rik|BB284719|Gm19268|MAS20|MOM19|TOM20|mKIAA0016	translocase of outer mitochondrial membrane 20 homolog (yeast)	protein-coding
upeaks-32146	chr4	125583922	125584292	+	0	NA	intron (NM_001081097, intron 1 of 15)	RMER20A|LTR|ERVK	79358	NR_035409	100124641		NR_035409	ENSMUSG00000076033	Mir692-3	Mir692-2b|Mirn692-2b|mmu-mir-692-3	microRNA 692-3	ncRNA
upeaks-38196	chr6	121087625	121087856	+	0	NA	intron (NM_001270475, intron 1 of 31)	intron (NM_001270475, intron 1 of 31)	-6113	NR_138097	194401	Mm.122399	NM_153396	ENSMUSG00000051586	Mical3	C130040D16Rik|Mical-3|mKIAA1364	microtubule associated monooxygenase, calponin and LIM domain containing 3	protein-coding
upeaks-32361	chr4	131722049	131722248	+	0	NA	Intergenic	Intergenic	116130	NM_011214	19273	Mm.4860	NM_011214	ENSMUSG00000028909	Ptpru	Ftp-1|PCP-2|PTP|PTP-lambda|PTPlambda|Pcp2|Ptpf|Ptprl|R-PTP-U|R-PTP-psi|RPTPlambda	protein tyrosine phosphatase, receptor type, U	protein-coding
upeaks-8744	chr11	113676476	113676729	+	0	NA	intron (NM_138598, intron 2 of 2)	intron (NM_138598, intron 2 of 2)	7549	NM_138598	28081	Mm.351688	NM_138598	ENSMUSG00000041629	Fam104a	D11Wsu99e	family with sequence similarity 104, member A	protein-coding
upeaks-26834	chr2	158448140	158448344	+	0	NA	intron (NM_001291137, intron 15 of 30)	ID4|SINE|ID	38389	NM_001291138	228850	Mm.398185	NM_177227	ENSMUSG00000027652	Ralgapb	AI507211|B230339M05Rik|p170	Ral GTPase activating protein, beta subunit (non-catalytic)	protein-coding
upeaks-22226	chr19	3831722	3832127	+	0	NA	Intergenic	Intergenic	-19849	NR_073190	12660	Mm.225505	NM_013490	ENSMUSG00000024843	Chka	CK|CK/EK-alpha|Chetk-alpha|Chk|ChoK|EK|EtnK-alpha	choline kinase alpha	protein-coding
upeaks-28947	chr3	98106526	98106834	+	0	NA	intron (NM_010928, intron 11 of 33)	intron (NM_010928, intron 11 of 33)	-53954	NM_027665	71078	Mm.50711	NM_027665	ENSMUSG00000043468	Adam30	4933424D07Rik|svph4	a disintegrin and metallopeptidase domain 30	protein-coding
upeaks-37791	chr6	98114438	98114742	+	0	NA	Intergenic	Intergenic	122807	NM_008601	17342	Mm.333284	NM_008601	ENSMUSG00000035158	Mitf	BCC2|Bhlhe32|Gsfbcc2|Vitiligo|Wh|bw|mi|vit	microphthalmia-associated transcription factor	protein-coding
upeaks-11793	chr13	41031562	41031761	+	0	NA	intron (NM_008547, intron 11 of 12)	ID_B1|SINE|B4	15411	NM_025387	66154	Mm.30005	NM_025387	ENSMUSG00000021361	Tmem14c	1110021D01Rik|AU020193|HSPC194	transmembrane protein 14C	protein-coding
upeaks-29308	chr3	116203972	116204442	+	0	NA	Intergenic	Intergenic	49277	NM_022427	64378	Mm.40025	NM_022427	ENSMUSG00000068696	Gpr88	AW061286|Strg	G-protein coupled receptor 88	protein-coding
upeaks-17143	chr15	103382852	103383121	+	0	NA	Intergenic	Intergenic	-16195	NM_010577	16402	Mm.16234	NM_010577	ENSMUSG00000000555	Itga5	Cd49e|Fnra|VLA5	integrin alpha 5 (fibronectin receptor alpha)	protein-coding
upeaks-44410	chr8	128473995	128474199	+	0	NA	intron (NM_008737, intron 9 of 16)	intron (NM_008737, intron 9 of 16)	114856	NR_035436	100316680		NR_035436	ENSMUSG00000084523	Mir1903	Mirn1903|mmu-mir-1903	microRNA 1903	ncRNA
upeaks-15782	chr15	51671818	51672089	+	0	NA	Intergenic	Intergenic	193508	NM_080635	68135	Mm.289800	NM_080635	ENSMUSG00000022312	Eif3h	1110008A16Rik|40kD|9430017H16Rik|EIF3-P40|EIF3-gamma|Eif3s3	eukaryotic translation initiation factor 3, subunit H	protein-coding
upeaks-46212	chr9	90047978	90048479	+	0	NA	Intergenic	ID_B1|SINE|B4	-6039	NM_001312649	13036	Mm.2277	NM_007801	ENSMUSG00000032359	Ctsh	AL022844	cathepsin H	protein-coding
upeaks-32706	chr4	139334774	139335258	+	0	NA	Intergenic	Lx4B|LINE|L1	17560	NM_001290810	69902	Mm.27871	NM_023536	ENSMUSG00000028741	Mrto4	2610012O22Rik|Mg684|Mrt4	mRNA turnover 4, ribosome maturation factor	protein-coding
upeaks-22214	chr19	3583697	3583987	+	0	NA	TTS (NM_008513)	TTS (NM_008513)	-8093	NM_028999	52036	Mm.284686	NM_028999	ENSMUSG00000024908	Ppp6r3	4930528G08Rik|9130026N02Rik|D19Bwg1430e|D19Ertd703e|Pp6r3|Ppcs3|Pptcs3|Sapl|Saps3|mKIAA1558	protein phosphatase 6, regulatory subunit 3	protein-coding
upeaks-44631	chr9	20830881	20831348	+	0	NA	Intergenic	Intergenic	12610	NM_001030290	235033	Mm.297661	NM_001030290	ENSMUSG00000053773	Rdh8	Gm182|prRDH	retinol dehydrogenase 8	protein-coding
upeaks-11150	chr13	6085949	6086209	+	0	NA	Intergenic	Intergenic	224590	NM_011803	23849	Mm.275036	NM_011803	ENSMUSG00000000078	Klf6	AI448727|BCD1|C86813|CPBP|Copeb|FM2|FM6|Ierepo1|Ierepo3|R75280|Zf9	Kruppel-like factor 6	protein-coding
upeaks-32863	chr4	143435427	143435788	+	0	NA	Intergenic	Intergenic	14695	NM_173773	242737	Mm.148643	NM_173773	ENSMUSG00000047799	Oog4	E330017M15	oogenesin 4	protein-coding
upeaks-6097	chr11	12872813	12873155	+	0	NA	Intergenic	MIRc|SINE|MIR	-408024	NM_001282993	12808	Mm.22847	NM_172496	ENSMUSG00000020173	Cobl	-	cordon-bleu WH2 repeat	protein-coding
upeaks-35231	chr5	118691392	118691844	+	0	NA	intron (NM_001347445, intron 4 of 30)	intron (NM_001347445, intron 4 of 30)	130899	NM_172424	76199	Mm.206238	NM_172424	ENSMUSG00000018076	Med13l	2210413I17Rik|6330591G05Rik|9030618F05Rik|Thrap2|Trap240L|mKIAA1025	mediator complex subunit 13-like	protein-coding
upeaks-44029	chr8	119374838	119375038	+	0	NA	Intergenic	MuRRS4-int|LTR|ERV1	-19954	NM_019966	56690	Mm.423037	NM_019966	ENSMUSG00000074064	Mlycd	AI324784|Mcd	malonyl-CoA decarboxylase	protein-coding
upeaks-22216	chr19	3674329	3674576	+	0	NA	intron (NM_008513, intron 1 of 22)	intron (NM_008513, intron 1 of 22)	12112	NM_008513	16973	Mm.274581	NM_008513	ENSMUSG00000024913	Lrp5	BMND1|HBM|LR3|LRP7|OPPG|mKIAA4142	low density lipoprotein receptor-related protein 5	protein-coding
upeaks-21241	chr18	37877701	37878049	+	0	NA	intron (NM_007858, intron 16 of 26)	intron (NM_007858, intron 16 of 26)	-23215	NR_105945	102465592		NR_105945	ENSMUSG00000098706	Mir6979	Gm27524|mmu-mir-6979	microRNA 6979	ncRNA
upeaks-10259	chr12	80930278	80930524	+	0	NA	Intergenic	Intergenic	-5954	NR_033786	67340	Mm.386790	NR_033786	ENSMUSG00000101912	1700052I22Rik	-	RIKEN cDNA 1700052I22 gene	ncRNA
upeaks-44891	chr9	32949169	32949403	+	0	NA	Intergenic	ORR1E|LTR|ERVL-MaLR	-20320	NR_131058	330917	Mm.488283	NR_131058		Gm27162	A430016B06	predicted gene 27162	ncRNA
upeaks-28255	chr3	63893864	63894063	+	0	NA	Intergenic	Intergenic	35422	NM_177856	329659	Mm.39342	NM_177856	ENSMUSG00000048581	E130311K13Rik	-	RIKEN cDNA E130311K13 gene	protein-coding
upeaks-47348	chrX	48207816	48208033	+	0	NA	intron (NM_172465, intron 1 of 9)	intron (NM_172465, intron 1 of 9)	778	NM_172465	208884	Mm.207367	NM_172465	ENSMUSG00000036985	Zdhhc9	6430508G22|9530098M12Rik	zinc finger, DHHC domain containing 9	protein-coding
upeaks-4551	chr10	78101079	78101339	+	0	NA	Intergenic	RLTR20B5_MM|LTR|ERVK	31841	NM_015790	50723	Mm.17819	NM_015790	ENSMUSG00000000732	Icosl	AU044799|B7-H2|B7RP-1|B7h|BG071784|GI50|GL50|GL50-B|ICOS-L|Icoslg|LICOS|Ly115l|mKIAA0653	icos ligand	protein-coding
upeaks-18828	chr17	7876014	7876497	+	0	NA	Intergenic	LTR72_RN|LTR|ERV1	-49745	NM_145968	72536	Mm.119680	NM_145968	ENSMUSG00000033450	Tagap	2610315E15Rik	T cell activation Rho GTPase activating protein	protein-coding
upeaks-42355	chr8	31018192	31018654	+	0	NA	Intergenic	MTE2b|LTR|ERVL-MaLR	-71239	NM_025869	66959	Mm.23916	NM_025869	ENSMUSG00000039661	Dusp26	2310043K02Rik|Skrp3	dual specificity phosphatase 26 (putative)	protein-coding
upeaks-43862	chr8	111705249	111705515	+	0	NA	Intergenic	Intergenic	-14372	NM_025583	66473	Mm.34374	NM_025583	ENSMUSG00000031957	Ctrb1	2200008D09Rik|AI504462|Ctrb|Prt-2	chymotrypsinogen B1	protein-coding
upeaks-45287	chr9	51230696	51231115	+	0	NA	intron (NM_011136, intron 1 of 4)	intron (NM_011136, intron 1 of 4)	17215	NM_011136	18985	Mm.897	NM_011136	ENSMUSG00000032053	Pou2af1	BOB.1|Bob-1|Bob1|OBF-1|OBF.1|OCA-B|OCAB	POU domain, class 2, associating factor 1	protein-coding
upeaks-26416	chr2	145457033	145457375	+	0	NA	intron (NM_053195, intron 3 of 16)	intron (NM_053195, intron 3 of 16)	97778	NM_001037929	627302	Mm.445953	NM_001037929		Gm14092	OTTMUSG00000015643	predicted gene 14092	protein-coding
upeaks-29002	chr3	100810380	100810792	+	0	NA	Intergenic	Intergenic	-14873	NM_178594	242122	Mm.137467	NM_178594	ENSMUSG00000051076	Vtcn1	B7h4|B7s1|B7x|BC032925	V-set domain containing T cell activation inhibitor 1	protein-coding
upeaks-37221	chr6	66910461	66911083	+	0	NA	intron (NM_001177558, intron 1 of 4)	intron (NM_001177558, intron 1 of 4)	13881	NM_001177558	14701	Mm.234342	NM_025278	ENSMUSG00000036402	Gng12	2010305F15Rik|AA536815|AI115529|AI314170|AI842738	guanine nucleotide binding protein (G protein), gamma 12	protein-coding
upeaks-2178	chr1	153769617	153769835	+	0	NA	Intergenic	RMER17B|LTR|ERVK	20300	NM_011882	24014	Mm.259254	NM_011882	ENSMUSG00000066800	Rnasel	E230029I04Rik	ribonuclease L (2', 5'-oligoisoadenylate synthetase-dependent)	protein-coding
upeaks-32221	chr4	127971323	127971522	+	0	NA	promoter-TSS (NM_001134733)	promoter-TSS (NM_001134733)	-581	NM_001134733	635169	Mm.346755	NM_001134733	ENSMUSG00000028813	CK137956	-	cDNA sequence CK137956	protein-coding
upeaks-30257	chr4	4242291	4242900	+	0	NA	Intergenic	Intergenic	-104150	NM_001002927	18619	Mm.475097	NM_001002927	ENSMUSG00000045573	Penk	AI326464|ENK|PPA|Penk1	preproenkephalin	protein-coding
upeaks-47874	chrX	139813986	139814449	+	0	NA	Intergenic	Intergenic	13409	NM_016675	12738	Mm.117068	NM_016675	ENSMUSG00000047230	Cldn2	AL022813	claudin 2	protein-coding
upeaks-32787	chr4	141514311	141514626	+	0	NA	intron (NM_001347235, intron 3 of 14)	intron (NM_001347235, intron 3 of 14)	24129	NM_019763	56381	Mm.299906	NM_019763	ENSMUSG00000040761	Spen	Mint|mKIAA0929	SPEN homolog, transcriptional regulator (Drosophila)	protein-coding
upeaks-2951	chr1	184872086	184872406	+	0	NA	3' UTR (NM_178692, exon 2 of 2)	3' UTR (NM_178692, exon 2 of 2)	10790	NM_178692	226777	Mm.169542	NM_178692	ENSMUSG00000039349	C130074G19Rik	-	RIKEN cDNA C130074G19 gene	protein-coding
upeaks-3677	chr10	28098920	28099309	+	0	NA	intron (NM_008983, intron 1 of 31)	intron (NM_008983, intron 1 of 31)	24294	NM_008983	19272	Mm.332303	NM_008983	ENSMUSG00000019889	Ptprk	AI853699|PTPk|RPTPkappa	protein tyrosine phosphatase, receptor type, K	protein-coding
upeaks-10294	chr12	82291471	82291763	+	0	NA	intron (NM_001167983, intron 3 of 23)	intron (NM_001167983, intron 3 of 23)	-19732	NM_172579	217692	Mm.261333	NM_172579	ENSMUSG00000042700	Sipa1l1	4931426N11Rik|AW213287|Spar|mKIAA0440	signal-induced proliferation-associated 1 like 1	protein-coding
upeaks-30346	chr4	10919126	10919345	+	0	NA	Intergenic	Intergenic	44737	NM_026005	67157	Mm.440552	NM_026005	ENSMUSG00000059482	2610301B20Rik	AI428449	RIKEN cDNA 2610301B20 gene	protein-coding
upeaks-25450	chr2	102380761	102381286	+	0	NA	intron (NM_020267, intron 1 of 4)	intron (NM_020267, intron 1 of 4)	19877	NM_020267	80985	Mm.315002	NM_020267	ENSMUSG00000027189	Trim44	Dipb|Mc7	tripartite motif-containing 44	protein-coding
upeaks-8015	chr11	95126498	95126986	+	0	NA	Intergenic	Intergenic	6625	NM_010055	13393	Mm.5194	NM_010055	ENSMUSG00000001510	Dlx3	AV237891|Dlx-3	distal-less homeobox 3	protein-coding
upeaks-34009	chr5	45534850	45535089	+	0	NA	intron (NM_021416, intron 12 of 15)	intron (NM_021416, intron 12 of 15)	14740	NM_025895	66999	Mm.283045	NM_025895	ENSMUSG00000015804	Med28	1500003D12Rik|AI451633|AU045690|Eg1|FKSG20|magicin	mediator complex subunit 28	protein-coding
upeaks-5753	chr10	127899809	127900144	+	0	NA	intron (NM_027301, intron 1 of 3)	L2a|LINE|L2	1441	NM_027301	70061	Mm.158320	NM_027301	ENSMUSG00000040127	Sdr9c7	1810054F20Rik|Rdh20|Rdhs|SDR-O|Sdro	4short chain dehydrogenase/reductase family 9C, member 7	protein-coding
upeaks-34098	chr5	53110225	53110575	+	0	NA	intron (NM_172710, intron 23 of 23)	intron (NM_172710, intron 23 of 23)	61047	NM_011402	20531	Mm.284891	NM_011402	ENSMUSG00000029188	Slc34a2	AA536683|D5Ertd227e|NaPi-2b|Npt2b	solute carrier family 34 (sodium phosphate), member 2	protein-coding
upeaks-31593	chr4	105109721	105110266	+	0	NA	promoter-TSS (NM_178143)	promoter-TSS (NM_178143)	-95	NM_178143	108079	Mm.48638	NM_178143	ENSMUSG00000028518	Prkaa2	2310008I11Rik|A830082D05|AMPKalpha2	protein kinase, AMP-activated, alpha 2 catalytic subunit	protein-coding
upeaks-46830	chr9	115817630	115818080	+	0	NA	Intergenic	B2_Mm1a|SINE|B2	-91600	NM_028638	73748	Mm.485018	NM_028638	ENSMUSG00000056880	Gadl1	1110027M19Rik|ADC|CSADC	glutamate decarboxylase-like 1	protein-coding
upeaks-43924	chr8	114885293	114885571	+	0	NA	intron (NM_019573, intron 8 of 8)	intron (NM_019573, intron 8 of 8)	445780	NM_019573	80707	Mm.440420	NM_019573	ENSMUSG00000004637	Wwox	5330426P09Rik|9030416C10Rik|WOX1	WW domain-containing oxidoreductase	protein-coding
upeaks-46516	chr9	106157995	106158334	+	0	NA	promoter-TSS (NM_174846)	promoter-TSS (NM_174846)	-26	NM_174846	235582	Mm.335420	NM_174846	ENSMUSG00000020258	Glyctk	6230410P16Rik|C430006L12	glycerate kinase	protein-coding
upeaks-31687	chr4	107544844	107545286	+	0	NA	intron (NM_147221, intron 2 of 10)	MLT1C|LTR|ERVL-MaLR	110346	NM_147221	230587	Mm.331757	NM_147221	ENSMUSG00000034762	Glis1	Gli5|Gli6|GliH1	GLIS family zinc finger 1	protein-coding
upeaks-4280	chr10	62799932	62800131	+	0	NA	Intergenic	Intergenic	-7663	NM_026201	67500	Mm.196371	NM_026201	ENSMUSG00000020074	Ccar1	2610511G16Rik|9430036H15Rik|Carp1	cell division cycle and apoptosis regulator 1	protein-coding
upeaks-11801	chr13	41280743	41280942	+	0	NA	Intergenic	RMER20B|LTR|ERVK	30998	NM_001135577	108934	Mm.38578	NM_001135577	ENSMUSG00000091264	Smim13	2900036K02Rik	small integral membrane protein 13	protein-coding
upeaks-40983	chr7	112780868	112781398	+	0	NA	intron (NM_009346, intron 2 of 12)	intron (NM_009346, intron 2 of 12)	21749	NM_001166585	21676	Mm.24685	NM_009346	ENSMUSG00000055320	Tead1	2610024B07Rik|B230114H05Rik|Gtrgeo5|TEAD-1|TEF-1|Tcf13|mTEF-1	TEA domain family member 1	protein-coding
upeaks-36886	chr6	47259671	47260024	+	0	NA	intron (NM_025771, intron 1 of 3)	intron (NM_025771, intron 1 of 3)	15451	NM_025771	66797	Mm.440084	NM_025771	ENSMUSG00000039419	Cntnap2	5430425M22Rik|Caspr2|mKIAA0868	contactin associated protein-like 2	protein-coding
upeaks-22731	chr19	24317294	24317500	+	0	NA	intron (NM_008846, intron 13 of 14)	intron (NM_008846, intron 13 of 14)	-36811	NM_008044	14297	Mm.7319	NM_008044	ENSMUSG00000059363	Fxn	FA|FARR|Frda|X25	frataxin	protein-coding
upeaks-29028	chr3	101601854	101602166	+	0	NA	intron (NM_144900, intron 1 of 22)	intron (NM_144900, intron 1 of 22)	2697	NM_144900	11928	Mm.193670	NM_144900	ENSMUSG00000033161	Atp1a1	Atpa-1|BC010319	ATPase, Na+/K+ transporting, alpha 1 polypeptide	protein-coding
upeaks-14907	chr14	103093773	103093972	+	0	NA	intron (NM_001347601, intron 2 of 4)	intron (NM_001347601, intron 2 of 4)	5132	NM_001347601	50789	Mm.214746	NM_015822	ENSMUSG00000022124	Fbxl3	AU041772|AW212966|FBK|Fbl3a|Fbxl3a|Ovtm|Play68	F-box and leucine-rich repeat protein 3	protein-coding
upeaks-31597	chr4	105170543	105170800	+	0	NA	intron (NM_080555, intron 1 of 5)	intron (NM_080555, intron 1 of 5)	13324	NM_080555	67916	Mm.348326	NM_080555	ENSMUSG00000028517	Plpp3	1110003O22Rik|2610002D05Rik|AV025606|D4Bwg0538e|D4Bwg1535e|Lpp3|Ppab2b|Ppap2b	phospholipid phosphatase 3	protein-coding
upeaks-20825	chr18	10872350	10872628	+	0	NA	Intergenic	B1F|SINE|Alu	-86937	NR_029781	723959		NR_029781	ENSMUSG00000106348	Mir1a-2	Mir1-2|Mirn1-2|mir-1a-2|mmu-mir-1-2|mmu-mir-1a-2	microRNA 1a-2	ncRNA
upeaks-15483	chr15	27444765	27445076	+	0	NA	Intergenic	Intergenic	-21757	NM_020332	11732	Mm.265264	NM_020332	ENSMUSG00000022265	Ank	Ankh|D15Ertd221e|ank|mKIAA1581	progressive ankylosis	protein-coding
upeaks-20523	chr17	84365954	84366230	+	0	NA	intron (NM_183021, intron 26 of 37)	intron (NM_183021, intron 26 of 37)	100116	NM_183021	240174	Mm.246767	NM_177826	ENSMUSG00000024251	Thada	6530405K19|A930021O22|AU019899|BC052885|GITA	thyroid adenoma associated	protein-coding
upeaks-37724	chr6	94154944	94155178	+	0	NA	intron (NR_130996, intron 1 of 1)	intron (NR_130996, intron 1 of 1)	82381	NR_130996	78178	Mm.452749	NR_130996	ENSMUSG00000045095	4930511A08Rik	-	RIKEN cDNA 4930511A08 gene	ncRNA
upeaks-9431	chr12	21898989	21899479	+	0	NA	Intergenic	CpG	257412	NR_136920	100043416		NM_001004167	ENSMUSG00000093846	Gm4425	EG432637|Gm5433	KRAB-domain protein pseudogene	pseudo
upeaks-12433	chr13	71219995	71220315	+	0	NA	Intergenic	Intergenic	113066	NR_130325	100316804		NR_130325	ENSMUSG00000080580	Mir466f-4	Mirn466f-4|mmu-mir-466f-4	microRNA 466f-4	ncRNA
upeaks-29672	chr3	133339534	133339841	+	0	NA	intron (NM_146141, intron 6 of 11)	intron (NM_146141, intron 6 of 11)	29577	NM_001293641	74776	Mm.210305	NM_146141	ENSMUSG00000028013	Ppa2	1110013G13Rik|Sid6306	pyrophosphatase (inorganic) 2	protein-coding
upeaks-17373	chr16	16377124	16377397	+	0	NA	Intergenic	RLTR47|LTR|ERVK	-18229	NM_001276340	74006	Mm.218820	NM_152816	ENSMUSG00000022789	Dnm1l	6330417M19Rik|AI450666|Dlp1|Dnmlp1|Drp1|python	dynamin 1-like	protein-coding
upeaks-3993	chr10	45025262	45025675	+	0	NA	Intergenic	Intergenic	-41746	NM_011156	19072	Mm.10281	NM_011156	ENSMUSG00000019849	Prep	AI047692|AI450383|D10Wsu136e|PEP|Pop	prolyl endopeptidase	protein-coding
upeaks-20422	chr17	80710284	80710566	+	0	NA	intron (NM_001290345, intron 1 of 33)	intron (NM_001290345, intron 1 of 33)	17600	NM_001290345	225028	Mm.311948	NM_001081357	ENSMUSG00000024242	Map4k3	4833416M01Rik|4833416M07Rik|9530052P13Rik|Glk|MAPKKKK3|MEKKK 3|MEKKK3|RAB8IPL1	mitogen-activated protein kinase kinase kinase kinase 3	protein-coding
upeaks-6801	chr11	53797551	53797843	+	0	NA	intron (NR_033332, intron 3 of 3)	intron (NR_033332, intron 3 of 3)	27224	NM_001159396	16362	Mm.105218	NM_008390	ENSMUSG00000018899	Irf1	AU020929|Irf-1	interferon regulatory factor 1	protein-coding
upeaks-6353	chr11	30164559	30164816	+	0	NA	intron (NM_175836, intron 1 of 34)	intron (NM_175836, intron 1 of 34)	33570	NM_009260	20742	Mm.123110	NM_009260	ENSMUSG00000020315	Sptbn1	9930031C03Rik|AL033301|SPTB2|Spnb-2|Spnb2|elf1|elf3|mKIAA4049	spectrin beta, non-erythrocytic 1	protein-coding
upeaks-8350	chr11	101675373	101675582	+	0	NA	Intergenic	Intergenic	9936	NM_025404	80981	Mm.266840	NM_025404	ENSMUSG00000034936	Arl4d	1110036H21Rik|ARL6|AW456149|Arf4l|Arfl4|Arl5	ADP-ribosylation factor-like 4D	protein-coding
upeaks-6682	chr11	50012323	50012670	+	0	NA	Intergenic	Intergenic	-12835	NM_001290750	59044	Mm.359004	NM_021540	ENSMUSG00000020376	Rnf130	2510042A13Rik|G1RZFP|G1rp|GOLIATH|GP	ring finger protein 130	protein-coding
upeaks-6007	chr11	7197487	7197866	+	0	NA	promoter-TSS (NM_008341)	promoter-TSS (NM_008341)	-111	NM_008341	16006	Mm.21300	NM_008341	ENSMUSG00000020429	Igfbp1	-	insulin-like growth factor binding protein 1	protein-coding
upeaks-7369	chr11	72457982	72458533	+	0	NA	intron (NM_153060, intron 5 of 12)	MLT1G3|LTR|ERVL-MaLR	16770	NM_001276383	216892	Mm.212812	NM_153060	ENSMUSG00000040447	Spns2	-	spinster homolog 2	protein-coding
upeaks-36196	chr5	149592290	149592521	+	0	NA	intron (NM_029440, intron 15 of 22)	RLTR1B|LTR|ERV1	43910	NM_013559	15505	Mm.270681	NM_013559	ENSMUSG00000029657	Hsph1	105kDa|AI790491|Hsp105|Hsp110|hsp-E7I|hsp110/105	heat shock 105kDa/110kDa protein 1	protein-coding
upeaks-920	chr1	72218579	72218852	+	0	NA	Intergenic	Intergenic	-6408	NM_001005423	381269	Mm.422636	NM_001005423	ENSMUSG00000039395	Mreg	Gm974|Wdt2|dsu	melanoregulin	protein-coding
upeaks-37635	chr6	90491969	90492358	+	0	NA	Intergenic	Intergenic	29537	NM_023184	66277	Mm.38343	NM_023184	ENSMUSG00000030087	Klf15	1810013I09Rik|AV048136|AW494632|CKLF|KKLF	Kruppel-like factor 15	protein-coding
upeaks-43611	chr8	104176106	104176367	+	0	NA	intron (NM_001141925, intron 1 of 4)	intron (NM_001141925, intron 1 of 4)	5723	NM_001141924	65115	Mm.41849	NM_001141922	ENSMUSG00000031872	Bean1	Bean	brain expressed, associated with Nedd4, 1	protein-coding
upeaks-47984	chrX	153371577	153371929	+	0	NA	intron (NM_173780, intron 3 of 6)	intron (NM_173780, intron 3 of 6)	-126479	NM_018798	54609	Mm.430772	NM_018798	ENSMUSG00000050148	Ubqln2	Chap1|Dsk2|HRIHFB2157|Plic-2|Plic2	ubiquilin 2	protein-coding
upeaks-23101	chr19	42072042	42072253	+	0	NA	Intergenic	ORR1C1-int|LTR|ERVL-MaLR	14223	NM_198108	226123	Mm.259441	NM_198108	ENSMUSG00000049670	Morn4	-	MORN repeat containing 4	protein-coding
upeaks-16345	chr15	79068512	79068744	+	0	NA	Intergenic	RLTR18|LTR|ERVK	-5769	NM_144849	223690	Mm.24262	NM_144849	ENSMUSG00000033055	Ankrd54	C730048E16Rik|EST1068184|EST475269|Liar	ankyrin repeat domain 54	protein-coding
upeaks-35703	chr5	135723439	135723669	+	0	NA	intron (NM_008898, intron 2 of 15)	intron (NM_008898, intron 2 of 15)	12335	NR_106001	102466791		NR_106001	ENSMUSG00000099197	Mir7034	Gm27372|mmu-mir-7034	microRNA 7034	ncRNA
upeaks-30343	chr4	10887323	10887740	+	0	NA	intron (NM_026005, intron 4 of 5)	RLTR1B-int|LTR|ERV1	13033	NM_026005	67157	Mm.440552	NM_026005	ENSMUSG00000059482	2610301B20Rik	AI428449	RIKEN cDNA 2610301B20 gene	protein-coding
upeaks-20502	chr17	83962821	83963123	+	0	NA	Intergenic	Intergenic	-35580	NR_130994	78148	Mm.243918	NR_130994		8430430B14Rik	-	RIKEN cDNA 8430430B14 gene	ncRNA
upeaks-23420	chr19	55110588	55110840	+	0	NA	Intergenic	Intergenic	-11267	NM_008149	14732	Mm.210196	NM_008149	ENSMUSG00000024978	Gpam	GPAT|GPAT1	glycerol-3-phosphate acyltransferase, mitochondrial	protein-coding
upeaks-12770	chr13	95271004	95271313	+	0	NA	Intergenic	Intergenic	-20822	NM_001346782	218461	Mm.100167	NM_172263	ENSMUSG00000021684	Pde8b	B230331L10Rik|C030047E14Rik	phosphodiesterase 8B	protein-coding
upeaks-17609	chr16	25849995	25850227	+	0	NA	intron (NM_001127259, intron 4 of 13)	intron (NM_001127259, intron 4 of 13)	48195	NM_001127265	22061	Mm.20894	NM_011641	ENSMUSG00000022510	Trp63	AI462811|Ket|P51/P63|P63|P73l|Tp63|Trp53rp1	transformation related protein 63	protein-coding
upeaks-28077	chr3	51924540	51924821	+	0	NA	intron (NM_001004176, intron 1 of 4)	intron (NM_001004176, intron 1 of 4)	180326	NM_001004176	433586	Mm.234972	NM_001004176	ENSMUSG00000061143	Maml3	AV234550|BC049812|Mam-2|mKIAA1816	mastermind like 3 (Drosophila)	protein-coding
upeaks-40742	chr7	101354529	101354905	+	0	NA	intron (NM_001040111, intron 1 of 33)	intron (NM_001040111, intron 1 of 33)	6648	NM_001040111	69710	Mm.277687	NM_027180	ENSMUSG00000032812	Arap1	2410002L19Rik|Centd2|mKIAA0782	ArfGAP with RhoGAP domain, ankyrin repeat and PH domain 1	protein-coding
upeaks-40777	chr7	102259590	102259791	+	0	NA	Intergenic	PB1|SINE|Alu	-8134	NM_009287	20866	Mm.645	NM_009287	ENSMUSG00000030987	Stim1	SIM	stromal interaction molecule 1	protein-coding
upeaks-18574	chr16	93368148	93368564	+	0	NA	Intergenic	Intergenic	-1364	NR_030429	791074		NR_030429	ENSMUSG00000076457	Mir802	Mirn802|mir-802|mmu-mir-802	microRNA 802	ncRNA
upeaks-14348	chr14	61229811	61230170	+	0	NA	intron (NM_011892, intron 5 of 7)	intron (NM_011892, intron 5 of 7)	28500	NM_011892	24053	Mm.72173	NM_011892	ENSMUSG00000035296	Sgcg	35kDa|5430420E18Rik|AI642964|gamma-SG	sarcoglycan, gamma (dystrophin-associated glycoprotein)	protein-coding
upeaks-15783	chr15	51740072	51740362	+	0	NA	Intergenic	Intergenic	125244	NM_080635	68135	Mm.289800	NM_080635	ENSMUSG00000022312	Eif3h	1110008A16Rik|40kD|9430017H16Rik|EIF3-P40|EIF3-gamma|Eif3s3	eukaryotic translation initiation factor 3, subunit H	protein-coding
upeaks-7795	chr11	86871760	86872306	+	0	NA	intron (NR_106195, intron 4 of 8)	MER77|LTR|ERVL	-64373	NM_026191	67487	Mm.260627	NM_026191	ENSMUSG00000018425	Dhx40	2410016C14Rik|ARG147|DDX40|PAD	DEAH (Asp-Glu-Ala-His) box polypeptide 40	protein-coding
upeaks-11086	chr13	3106628	3106856	+	0	NA	Intergenic	Intergenic	-42733	NR_001581	73266	Mm.335891	NR_001581		Speer6-ps1	1700039A02Rik|SPEER-6	spermatogenesis associated glutamate (E)-rich protein 6, pseudogene 1	pseudo
upeaks-22779	chr19	26055210	26055431	+	0	NA	Intergenic	Charlie8|DNA|hAT-Charlie	382909	NM_145831	226049	Mm.275572	NM_145831	ENSMUSG00000048138	Dmrt2	Terra	doublesex and mab-3 related transcription factor 2	protein-coding
upeaks-12817	chr13	96983183	96983749	+	0	NA	Intergenic	Intergenic	50896	NM_025585	66479	Mm.390629	NM_025585	ENSMUSG00000052075	1700029F12Rik	-	RIKEN cDNA 1700029F12 gene	protein-coding
upeaks-27765	chr3	28026837	28027100	+	0	NA	intron (NM_008875, intron 3 of 25)	intron (NM_008875, intron 3 of 25)	42797	NM_008875	18805	Mm.212039	NM_008875	ENSMUSG00000027695	Pld1	AA536939|C85393|Pld1a|Pld1b|mPLD1	phospholipase D1	protein-coding
upeaks-39022	chr7	6171821	6172704	+	0	NA	promoter-TSS (NM_001146024)	promoter-TSS (NM_001146024)	-251	NM_028316	72667	Mm.274089	NM_028316	ENSMUSG00000044876	Zfp444	2810031J10Rik|6230401O10Rik|mFLJ00134	zinc finger protein 444	protein-coding
upeaks-27066	chr2	166637298	166637512	+	0	NA	intron (NM_177782, intron 4 of 39)	intron (NM_177782, intron 4 of 39)	-35313	NR_105783	102465188		NR_105783	ENSMUSG00000098675	Mir6364	Gm27327|mmu-mir-6364	microRNA 6364	ncRNA
upeaks-23444	chr19	55736109	55736335	+	0	NA	Intergenic	Intergenic	-5588	NM_001331139	21416	Mm.139815	NM_009333	ENSMUSG00000024985	Tcf7l2	TCF4B|TCF4E|Tcf-4|Tcf4	transcription factor 7 like 2, T cell specific, HMG box	protein-coding
upeaks-5582	chr10	121613624	121613836	+	0	NA	intron (NM_001081056, intron 6 of 24)	intron (NM_001081056, intron 6 of 24)	12586	NM_001081056	73192	Mm.25042	NM_001081056	ENSMUSG00000034667	Xpot	1110004L07Rik|3110065H13Rik|AI452076|C79645|EXPORTIN-T	exportin, tRNA (nuclear export receptor for tRNAs)	protein-coding
upeaks-23152	chr19	43887827	43888031	+	0	NA	intron (NM_028029, intron 4 of 15)	intron (NM_028029, intron 4 of 15)	-8161	NM_001306088	71972	Mm.159024	NM_028029	ENSMUSG00000025195	Dnmbp	2410003L07Rik|2410003M15Rik|TUBA	dynamin binding protein	protein-coding
upeaks-17343	chr16	14177962	14178340	+	0	NA	intron (NM_023317, intron 4 of 8)	L1MEf|LINE|L1	14876	NM_001114085	67203	Mm.24105	NM_023317	ENSMUSG00000022678	Nde1	2810027M15Rik|AU042936|AW822251|Nude|mNudE	nudE neurodevelopment protein 1	protein-coding
upeaks-181	chr1	15968513	15968782	+	0	NA	Intergenic	MuRRS4-int|LTR|ERV1	-75925	NM_001033288	226866	Mm.131665	NM_001033288	ENSMUSG00000032719	Sbspon	Gm106|Rpesp	somatomedin B and thrombospondin, type 1 domain containing	protein-coding
upeaks-7802	chr11	87023256	87023651	+	0	NA	intron (NR_106195, intron 4 of 8)	intron (NR_106195, intron 4 of 8)	-29691	NM_001005341	77864	Mm.191894	NM_001005341	ENSMUSG00000018427	Ypel2	6430570G24|E130113K08Rik	yippee-like 2 (Drosophila)	protein-coding
upeaks-1991	chr1	137591122	137591549	+	0	NA	Intergenic	Intergenic	-375120	NR_029795	735252		NR_029795	ENSMUSG00000065565	Mir181a-1	Mirn181a-1|Mirn213|miR-213|mir-181a-1|mmu-mir-213	microRNA 181a-1	ncRNA
upeaks-39639	chr7	35355306	35355835	+	0	NA	intron (NM_027897, intron 2 of 14)	intron (NM_027897, intron 2 of 14)	21333	NM_027897	52428	Mm.286600	NM_027897	ENSMUSG00000030494	Rhpn2	1300002E07Rik|AA536890|C85860|D7Ertd784e	rhophilin, Rho GTPase binding protein 2	protein-coding
upeaks-6462	chr11	35407695	35407894	+	0	NA	intron (NM_011412, intron 4 of 35)	intron (NM_011412, intron 4 of 35)	-209022	NR_029799	723924		NR_029799	ENSMUSG00000065583	Mir218-2	Mirn218-2|mir-218-2	microRNA 218-2	ncRNA
upeaks-34023	chr5	46573390	46573624	+	0	NA	Intergenic	Intergenic	-641098	NR_110478	78106	Mm.243807	NR_110478	ENSMUSG00000106602	4930405L22Rik	-	RIKEN cDNA 4930405L22 gene	ncRNA
upeaks-31415	chr4	95353862	95354440	+	0	NA	Intergenic	Intergenic	-203356	NM_001113412	75578	Mm.276098	NM_029347	ENSMUSG00000028573	Fggy	2310009E04Rik	FGGY carbohydrate kinase domain containing	protein-coding
upeaks-32341	chr4	130715172	130715405	+	0	NA	intron (NM_001159606, intron 3 of 17)	intron (NM_001159606, intron 3 of 17)	-34350	NR_028565	100217460		NR_028565	ENSMUSG00000065196	Snord85	MBII-251|Z50	small nucleolar RNA, C/D box 85	snoRNA
upeaks-23163	chr19	44013922	44014133	+	0	NA	intron (NM_001001446, intron 5 of 8)	intron (NM_001001446, intron 5 of 8)	15220	NM_001167905	226143	Mm.329866	NM_001001446	ENSMUSG00000025197	Cyp2c44	AW107714|BC034834|b2b386Clo	cytochrome P450, family 2, subfamily c, polypeptide 44	protein-coding
upeaks-39451	chr7	28389478	28389711	+	0	NA	intron (NM_026042, intron 3 of 3)	B4|SINE|B4	3096	NM_026042	67224	Mm.41647	NM_026042	ENSMUSG00000003444	Med29	2810405O22Rik|AU020902|Ixl	mediator complex subunit 29	protein-coding
upeaks-28264	chr3	64201096	64201550	+	0	NA	Intergenic	RLTR1D|LTR|ERV1	-63843	NM_001104592	100125586	Mm.469888	NM_001104592	ENSMUSG00000043897	Vmn2r2	ENSMUSG00000043897	vomeronasal 2, receptor 2	protein-coding
upeaks-29773	chr3	138127800	138128203	+	0	NA	intron (NM_001163457, intron 3 of 19)	intron (NM_001163457, intron 3 of 19)	3376	NM_008642	17777	Mm.2941	NM_008642	ENSMUSG00000028158	Mttp	1810043K16Rik|MTP	microsomal triglyceride transfer protein	protein-coding
upeaks-17123	chr15	103074670	103075129	+	0	NA	Intergenic	Intergenic	40504	NM_013553	15423	Mm.1351	NM_013553	ENSMUSG00000075394	Hoxc4	Hox-3.5	homeobox C4	protein-coding
upeaks-45222	chr9	47895052	47895353	+	0	NA	Intergenic	Intergenic	-76994	NR_046048	100038460	Mm.447649	NR_046048		Gm10677	ENSMUSG00000074363	predicted gene 10677	ncRNA
upeaks-34055	chr5	51478230	51478810	+	0	NA	intron (NR_132764, intron 7 of 12)	intron (NR_132764, intron 7 of 12)	75401	NM_008904	19017	Mm.259072	NM_008904	ENSMUSG00000029167	Ppargc1a	A830037N07Rik|ENSMUSG00000079510|Gm11133|PGC-1|PPARGC-1-alpha|Pgc-1alpha|Pgc1|Pgco1|Ppargc1	peroxisome proliferative activated receptor, gamma, coactivator 1 alpha	protein-coding
upeaks-12909	chr13	100576039	100576311	+	0	NA	Intergenic	Intergenic	-23677	NM_008756	18260	Mm.4807	NM_008756	ENSMUSG00000021638	Ocln	AI503564|Ocl	occludin	protein-coding
upeaks-30181	chr3	157031583	157032030	+	0	NA	intron (NM_177274, intron 3 of 6)	intron (NM_177274, intron 3 of 6)	470012	NM_001039094	320840	Mm.317293	NM_177274	ENSMUSG00000040037	Negr1	5330422G01Rik|KILON|Ntra	neuronal growth regulator 1	protein-coding
upeaks-41552	chr7	134518321	134518640	+	0	NA	Intergenic	B4|SINE|B4	-141652	NM_001081331	71007	Mm.334285	NM_001081331	ENSMUSG00000030994	D7Ertd443e	4933400E14Rik|FATS|Gm497	DNA segment, Chr 7, ERATO Doi 443, expressed	protein-coding
upeaks-13721	chr14	28147285	28147509	+	0	NA	intron (NM_177814, intron 13 of 15)	intron (NM_177814, intron 13 of 15)	-358076	NM_009524	22418	Mm.287544	NM_009524	ENSMUSG00000021994	Wnt5a	8030457G12Rik|Wnt-5a	wingless-type MMTV integration site family, member 5A	protein-coding
upeaks-14942	chr14	104336854	104337118	+	0	NA	Intergenic	(CGGAA)n|Simple_repeat|Simple_repeat	131013	NM_011143	18996	Mm.246550	NM_011143	ENSMUSG00000048349	Pou4f1	Brn-3|Brn-3.0|Brn3|Brn3.0|Brn3a|E130119J07Rik	POU domain, class 4, transcription factor 1	protein-coding
upeaks-22037	chr18	79293677	79294234	+	0	NA	Intergenic	Intergenic	-184564	NM_053099	240427	Mm.312871	NM_053099	ENSMUSG00000024548	Setbp1	C130092E12|Seb|mKIAA0437	SET binding protein 1	protein-coding
upeaks-9905	chr12	64367762	64368100	+	0	NA	Intergenic	L4_A_Mam|LINE|RTE-X	106967	NM_001163271	623046	Mm.189552	NM_001163271	ENSMUSG00000043060	Fscb	EG623046	fibrous sheath CABYR binding protein	protein-coding
upeaks-12265	chr13	60897324	60897798	+	0	NA	promoter-TSS (NM_007797)	promoter-TSS (NM_007797)	-114	NM_007797	13025	Mm.30144	NM_007797	ENSMUSG00000074874	Ctla2b	AW545568|Ctla-2b	cytotoxic T lymphocyte-associated protein 2 beta	protein-coding
upeaks-9808	chr12	54399209	54399412	+	0	NA	Intergenic	Intergenic	-7992	NR_033689	665239	Mm.26856	NR_033689		Gm7550	EG665239|Gm666	predicted gene 7550	ncRNA
upeaks-7198	chr11	68806777	68807050	+	0	NA	intron (NM_175260, intron 33 of 40)	intron (NM_175260, intron 33 of 40)	46218	NM_023668	83431	Mm.31979	NM_023668	ENSMUSG00000018736	Ndel1	2600006O07Rik|MITAP1|NUDEL|mNudel	nudE neurodevelopment protein 1 like 1	protein-coding
upeaks-16558	chr15	84706920	84707252	+	0	NA	TTS (NM_001346662)	TTS (NM_001346662)	-12966	NM_001164628	73167	Mm.128411	NM_028455	ENSMUSG00000078954	Arhgap8	3110043J09Rik	Rho GTPase activating protein 8	protein-coding
upeaks-40303	chr7	79428072	79428596	+	0	NA	intron (NM_145946, intron 18 of 37)	intron (NM_145946, intron 18 of 37)	35996	NM_145946	208836	Mm.349493	NM_145946	ENSMUSG00000039187	Fanci	-	Fanconi anemia, complementation group I	protein-coding
upeaks-44516	chr9	11380527	11380869	+	0	NA	Intergenic	RLTR1F_Mm|LTR|ERVK	-475923	NM_001170787	244682	Mm.187021	NM_001033359	ENSMUSG00000039488	Cntn5	6720426O10Rik|A830025P08Rik|Gm507|NB-2	contactin 5	protein-coding
upeaks-6615	chr11	46675838	46676038	+	0	NA	intron (NM_134249, intron 8 of 8)	intron (NM_134249, intron 8 of 8)	14419	NM_001161356	171284	Mm.234654	NM_134249	ENSMUSG00000040413	Timd2	AA816106|AU019358|AU019662|C78111|G9D3|TIM-2|Tim2	T cell immunoglobulin and mucin domain containing 2	protein-coding
upeaks-12248	chr13	60255835	60256129	+	0	NA	Intergenic	Intergenic	50511	NR_036449	100503759	Mm.38101	NM_177810		Gm5084	A030007L22|EG328264	predicted gene 5084	ncRNA
upeaks-27420	chr2	179170755	179171004	+	0	NA	Intergenic	RMER10A|LTR|ERVL	-244057	NM_026596	68175	Mm.158187	NM_026596		4930591A17Rik	-	RIKEN cDNA 4930591A17 gene	protein-coding
upeaks-32546	chr4	135313719	135314017	+	0	NA	Intergenic	Intergenic	39346	NM_016799	51796	Mm.1963	NM_016799	ENSMUSG00000028809	Srrm1	AA407769|POP101|Srm160	serine/arginine repetitive matrix 1	protein-coding
upeaks-2298	chr1	158617987	158618334	+	0	NA	intron (NM_007495, intron 16 of 22)	intron (NM_007495, intron 16 of 22)	112535	NR_030441	735253		NR_030441	ENSMUSG00000070103	Mir488	Mirn488|mir-488|mmu-mir-488	microRNA 488	ncRNA
upeaks-42011	chr8	10936729	10936979	+	0	NA	Intergenic	Intergenic	-8397	NR_135302	665306	Mm.358758	NR_030715	ENSMUSG00000038917	3930402G23Rik	-	RIKEN cDNA 3930402G23 gene	ncRNA
upeaks-44008	chr8	117700770	117701056	+	0	NA	Intergenic	Intergenic	-1033	NM_008290	15486	Mm.276466	NM_008290	ENSMUSG00000031844	Hsd17b2	AI194836|AI194967|AI255511	hydroxysteroid (17-beta) dehydrogenase 2	protein-coding
upeaks-23077	chr19	41445044	41445273	+	0	NA	Intergenic	Intergenic	-60088	NM_031376	83490	Mm.222266	NM_031376	ENSMUSG00000025017	Pik3ap1	1810044J04Rik|BCAP	phosphoinositide-3-kinase adaptor protein 1	protein-coding
upeaks-24153	chr2	28982178	28982383	+	0	NA	intron (NM_001166705, intron 3 of 5)	RMER5|LTR|ERV1	-65840	NM_001164186	54422	Mm.21390	NM_019446	ENSMUSG00000026805	Barhl1	Dres115|MBH2	BarH-like 1 (Drosophila)	protein-coding
upeaks-26737	chr2	155868752	155869056	+	0	NA	intron (NR_024487, intron 7 of 9)	intron (NR_024487, intron 7 of 9)	-34050	NM_027788	71405	Mm.260918	NM_027788	ENSMUSG00000074647	Fam83c	5530400B04Rik	family with sequence similarity 83, member C	protein-coding
upeaks-13153	chr13	112662961	112663206	+	0	NA	intron (NM_178746, intron 1 of 14)	intron (NM_178746, intron 1 of 14)	2317	NM_178746	268706	Mm.40834	NM_175376	ENSMUSG00000047789	Slc38a9	4833412L08Rik|6720411P22Rik|9130023D20Rik|9430067K09Rik|A730092C09	solute carrier family 38, member 9	protein-coding
upeaks-5823	chr10	128965003	128965432	+	0	NA	Intergenic	Intergenic	-4229	NM_027853	71664	Mm.337232	NM_027853	ENSMUSG00000025347	Mettl7b	0610006F02Rik|AI266817	methyltransferase like 7B	protein-coding
upeaks-6347	chr11	29821157	29821356	+	0	NA	intron (NM_146016, intron 14 of 41)	intron (NM_146016, intron 14 of 41)	4412	NM_176829	216622	Mm.443260	NM_176829	ENSMUSG00000078157	4931440F15Rik	Fem1ab	RIKEN cDNA 4931440F15 gene	protein-coding
upeaks-19855	chr17	47988747	47989056	+	0	NA	Intergenic	Intergenic	49392	NM_029689	76651	Mm.76918	NM_029689	ENSMUSG00000094928	1700122O11Rik	-	RIKEN cDNA 1700122O11 gene	protein-coding
upeaks-32890	chr4	145074270	145074648	+	0	NA	intron (NM_001276502, intron 53 of 68)	intron (NM_001276502, intron 53 of 68)	116207	NM_001276502	230895	Mm.240310	NM_001033190	ENSMUSG00000020220	Vps13d	-	vacuolar protein sorting 13D	protein-coding
upeaks-37857	chr6	100628288	100628574	+	0	NA	intron (NM_181590, intron 9 of 10)	intron (NM_181590, intron 9 of 10)	42726	NM_181590	72171	Mm.256022	NM_181590	ENSMUSG00000035378	Shq1	2810403P18Rik|Grim-1	SHQ1 homolog (S. cerevisiae)	protein-coding
upeaks-320	chr1	28431124	28431323	+	0	NA	Intergenic	Lx|LINE|L1	349029	NM_001013750	210962	Mm.214178	NM_001013750	ENSMUSG00000048411	Gm597	-	predicted gene 597	protein-coding
upeaks-42767	chr8	61574542	61574901	+	0	NA	intron (NM_001293772, intron 10 of 21)	intron (NM_001293772, intron 10 of 21)	16448	NM_001293774	72333	Mm.29933	NM_001081390	ENSMUSG00000058056	Palld	2410003B16Rik|6030492A02	palladin, cytoskeletal associated protein	protein-coding
upeaks-23509	chr19	58329312	58329511	+	0	NA	intron (NM_001285457, intron 4 of 9)	intron (NM_001285457, intron 4 of 9)	33207	NR_040449	791347	Mm.452208	NR_040449		Gm10007	ENSMUSG00000056739	predicted gene 10007	ncRNA
upeaks-12020	chr13	51768557	51768805	+	0	NA	intron (NM_013660, intron 1 of 15)	intron (NM_013660, intron 1 of 15)	25066	NM_013660	20354	Mm.33903	NM_013660	ENSMUSG00000021451	Sema4d	CD100|Semacl2|Semaj|Semcl2|coll-4	sema domain, immunoglobulin domain (Ig), transmembrane domain (TM) and short cytoplasmic domain, (semaphorin) 4D	protein-coding
upeaks-6008	chr11	7198718	7199072	+	0	NA	intron (NM_008341, intron 1 of 3)	intron (NM_008341, intron 1 of 3)	1108	NM_008341	16006	Mm.21300	NM_008341	ENSMUSG00000020429	Igfbp1	-	insulin-like growth factor binding protein 1	protein-coding
upeaks-47871	chrX	139800023	139800272	+	0	NA	promoter-TSS (NM_016675)	promoter-TSS (NM_016675)	-661	NM_016675	12738	Mm.117068	NM_016675	ENSMUSG00000047230	Cldn2	AL022813	claudin 2	protein-coding
upeaks-15284	chr15	6441813	6442112	+	0	NA	Intergenic	MTB|LTR|ERVL-MaLR	-3371	NM_013485	12279	Mm.29095	NM_013485	ENSMUSG00000022149	C9	-	complement component 9	protein-coding
upeaks-14963	chr14	105377727	105378244	+	0	NA	Intergenic	Intergenic	-49574	NR_045859	71362	Mm.410781	NR_045859		5430440P10Rik	-	RIKEN cDNA 5430440P10 gene	ncRNA
upeaks-33132	chr4	151953178	151953539	+	0	NA	intron (NM_172704, intron 3 of 15)	intron (NM_172704, intron 3 of 15)	19638	NM_172704	230935	Mm.21353	NM_172704	ENSMUSG00000039768	Dnajc11	E030019A03Rik	DnaJ heat shock protein family (Hsp40) member C11	protein-coding
upeaks-43777	chr8	108746283	108746711	+	0	NA	intron (NM_007496, intron 1 of 9)	MLT1D|LTR|ERVL-MaLR	31853	NM_007496	11906	Mm.416972	NM_007496	ENSMUSG00000038872	Zfhx3	A230102L03Rik|Atbf1|Sci|WBP9|mKIAA4228	zinc finger homeobox 3	protein-coding
upeaks-13212	chr13	115077442	115077708	+	0	NA	intron (NM_001033228, intron 1 of 28)	intron (NM_001033228, intron 1 of 28)	12583	NM_134058	105083	Mm.486295	NM_134058	ENSMUSG00000042275	Pelo	AA409897|AI852218	pelota homolog (Drosophila)	protein-coding
upeaks-30351	chr4	10955020	10955606	+	0	NA	Intergenic	Intergenic	52306	NM_175175	71801	Mm.34351	NM_175175	ENSMUSG00000049969	Plekhf2	1110070J07Rik|AA673237|ZFYVE18	pleckstrin homology domain containing, family F (with FYVE domain) member 2	protein-coding
upeaks-31410	chr4	95156807	95157312	+	0	NA	Intergenic	Intergenic	-104837	NM_010591	16476	Mm.275071	NM_010591	ENSMUSG00000052684	Jun	AP-1|Junc|c-jun	jun proto-oncogene	protein-coding
upeaks-46621	chr9	108392706	108393066	+	0	NA	promoter-TSS (NM_053216)	promoter-TSS (NM_053216)	52	NM_053216	112418	Mm.78287	NM_053216	ENSMUSG00000032611	1700102P08Rik	AI593206	RIKEN cDNA 1700102P08 gene	protein-coding
upeaks-27977	chr3	39638097	39638504	+	0	NA	Intergenic	Intergenic	751360	NM_183221	329628	Mm.316210	NM_183221	ENSMUSG00000046743	Fat4	6030410K14Rik|9430004M15	FAT atypical cadherin 4	protein-coding
upeaks-20479	chr17	83397639	83398051	+	0	NA	intron (NM_001114362, intron 1 of 21)	intron (NM_001114362, intron 1 of 21)	46914	NM_199466	78798	Mm.295565	NM_199466	ENSMUSG00000032624	Eml4	4930443C24Rik|AI644019	echinoderm microtubule associated protein like 4	protein-coding
upeaks-1780	chr1	131573731	131574098	+	0	NA	Intergenic	LSU-rRNA_Hsa|rRNA|rRNA	-25200	NM_011924	26361	Mm.89986	NM_011924	ENSMUSG00000026432	Avpr1b	AVPR3|V3/V1b|VIBR|VPR3	arginine vasopressin receptor 1B	protein-coding
upeaks-44169	chr8	121698171	121698477	+	0	NA	Intergenic	Intergenic	-32235	NM_020605	57340	Mm.306870	NM_020605	ENSMUSG00000025318	Jph3	JP-3|Jp3	junctophilin 3	protein-coding
upeaks-5752	chr10	127893679	127894090	+	0	NA	Intergenic	MLTR11B|LTR|ERVK	-4651	NM_027301	70061	Mm.158320	NM_027301	ENSMUSG00000040127	Sdr9c7	1810054F20Rik|Rdh20|Rdhs|SDR-O|Sdro	4short chain dehydrogenase/reductase family 9C, member 7	protein-coding
upeaks-16079	chr15	72928761	72929068	+	0	NA	intron (NM_029640, intron 14 of 21)	intron (NM_029640, intron 14 of 21)	-118590	NR_002864	353342	Mm.440245	NR_002864	ENSMUSG00000106847	Peg13	-	paternally expressed 13	ncRNA
upeaks-37278	chr6	71145688	71145969	+	0	NA	Intergenic	Intergenic	-1448	NM_001033929	232078	Mm.37547	NM_178413	ENSMUSG00000054474	Thnsl2	BC051244|TSH2	threonine synthase-like 2 (bacterial)	protein-coding
upeaks-34456	chr5	81029015	81029214	+	0	NA	intron (NM_198702, intron 1 of 27)	intron (NM_198702, intron 1 of 27)	7521	NM_198702	319387	Mm.273631	NM_198702	ENSMUSG00000037605	Adgrl3	5430402I23Rik|CIRL-3|D130075K09Rik|Gm1379|LEC3|Lphn3|mKIAA0768	adhesion G protein-coupled receptor L3	protein-coding
upeaks-21979	chr18	76007873	76008147	+	0	NA	intron (NM_145356, intron 2 of 4)	intron (NM_145356, intron 2 of 4)	90461	NR_045365	73009	Mm.443541	NR_045365		2900057B20Rik	-	RIKEN cDNA 2900057B20 gene	ncRNA
upeaks-47835	chrX	136747961	136748353	+	0	NA	intron (NR_033324, intron 2 of 9)	intron (NR_033324, intron 2 of 9)	-4471	NM_001168230	56397	Mm.27218	NM_019768	ENSMUSG00000031422	Morf4l2	2410017O14Rik|Mrgx|Sid393p|mKIAA0026	mortality factor 4 like 2	protein-coding
upeaks-15723	chr15	41843606	41843893	+	0	NA	intron (NM_001130164, intron 1 of 5)	Lx8b|LINE|L1	12791	NM_001130164	170719	Mm.254267	NM_130885	ENSMUSG00000022307	Oxr1	2210416C20Rik|C7|C7B	oxidation resistance 1	protein-coding
upeaks-3280	chr10	4354713	4354936	+	0	NA	exon (NM_031185, exon 3 of 4)	exon (NM_031185, exon 3 of 4)	33284	NM_001033466	381990	Mm.262466	NM_001033466	ENSMUSG00000075327	Zbtb2	Gm1103	zinc finger and BTB domain containing 2	protein-coding
upeaks-5292	chr10	110707873	110708080	+	0	NA	Intergenic	Intergenic	-37489	NM_178609	52679	Mm.11747	NM_178609	ENSMUSG00000020185	E2f7	A630014C11Rik|D10Ertd739e	E2F transcription factor 7	protein-coding
upeaks-1313	chr1	87908684	87909073	+	0	NA	intron (NM_177646, intron 3 of 29)	intron (NM_177646, intron 3 of 29)	-54579	NR_136921	100503175	Mm.426422	NR_136921	ENSMUSG00000101942	Gm19582	-	predicted gene, 19582	ncRNA
upeaks-42514	chr8	39491153	39491530	+	0	NA	intron (NR_035426, intron 4 of 5)	MMVL30-int|LTR|ERV1	151337	NM_031195	20288	Mm.239291	NM_031195	ENSMUSG00000025044	Msr1	MRS-A|MSR|MSR-A|SR-AI|SR-AII|Scara1|Scvr	macrophage scavenger receptor 1	protein-coding
upeaks-24501	chr2	38531101	38531377	+	0	NA	intron (NM_001159631, intron 1 of 9)	intron (NM_001159631, intron 1 of 9)	19363	NM_001159631	59126	Mm.143818	NM_021606	ENSMUSG00000026749	Nek6	1300007C09Rik	NIMA (never in mitosis gene a)-related expressed kinase 6	protein-coding
upeaks-9920	chr12	65474140	65474339	+	0	NA	Intergenic	RMER20B|LTR|ERVK	248722	NM_027614	70948	Mm.219475	NM_027614	ENSMUSG00000035560	Wdr20rt	4921538B03Rik|4930427E19Rik|Wdr20|Wdr20b	WD repeat domain 20, retrogene	protein-coding
upeaks-18949	chr17	14178475	14178878	+	0	NA	Intergenic	Intergenic	25155	NM_172826	240025	Mm.79993	NM_172826	ENSMUSG00000048826	Dact2	2900084M21Rik|A630024E20|Dpr2|Frd2|dapper2	dishevelled-binding antagonist of beta-catenin 2	protein-coding
upeaks-7121	chr11	64842804	64843510	+	0	NA	Intergenic	Intergenic	-135878	NM_023479	68626	Mm.157711	NM_023479	ENSMUSG00000020549	Elac2	1110017O07Rik|D11Wsu80e|Hpc2	elaC ribonuclease Z 2	protein-coding
upeaks-44025	chr8	118958902	118959101	+	0	NA	intron (NM_019707, intron 5 of 13)	intron (NM_019707, intron 5 of 13)	-385537	NM_024219	68196	Mm.358714	NM_024219	ENSMUSG00000031839	Hsbp1	0610007A03Rik|AA408769|Hsp25	heat shock factor binding protein 1	protein-coding
upeaks-34153	chr5	63045830	63046123	+	0	NA	Intergenic	Intergenic	232153	NM_001170705	100322896	Mm.479821	NM_001170705	ENSMUSG00000090326	Dthd1	Gm17384	death domain containing 1	protein-coding
upeaks-47884	chrX	140511070	140511269	+	0	NA	Intergenic	Intergenic	31499	NR_122039	14605	Mm.22216	NM_010286	ENSMUSG00000031431	Tsc22d3	DIP|Dsip1|Gilz|TSC-22R|Tilz3	TSC22 domain family, member 3	protein-coding
upeaks-14813	chr14	98406348	98406585	+	0	NA	Intergenic	MIR|SINE|MIR	-236701	NM_007826	13134	Mm.320593	NM_007826	ENSMUSG00000055639	Dach1	Dac|Dach	dachshund 1 (Drosophila)	protein-coding
upeaks-29825	chr3	141476129	141476360	+	0	NA	intron (NM_001293561, intron 1 of 16)	intron (NM_001293561, intron 1 of 16)	10680	NM_001293561	22253	Mm.24430	NM_009472	ENSMUSG00000059921	Unc5c	B130051O18Rik|Unc5h3|rcm	unc-5 netrin receptor C	protein-coding
upeaks-26414	chr2	145226101	145226466	+	0	NA	Intergenic	Intergenic	-16328	NM_053195	94249	Mm.217171	NM_053195	ENSMUSG00000063873	Slc24a3	NCKX3	solute carrier family 24 (sodium/potassium/calcium exchanger), member 3	protein-coding
upeaks-47995	chrX	155193889	155194345	+	0	NA	Intergenic	Intergenic	22332	NM_001291865	20229	Mm.2734	NM_009121	ENSMUSG00000025283	Sat1	AA617398|SSAT|Sat	spermidine/spermine N1-acetyl transferase 1	protein-coding
upeaks-38564	chr6	135385840	135386061	+	0	NA	Intergenic	Intergenic	18457	NM_001288627	13730	Mm.182785	NM_010128	ENSMUSG00000030208	Emp1	I-8-09|TMP	epithelial membrane protein 1	protein-coding
upeaks-27484	chr2	181068147	181068384	+	0	NA	Intergenic	LTRIS5|LTR|ERV1	-29088	NM_015730	11438	Mm.252369	NM_015730	ENSMUSG00000027577	Chrna4	Acra-4|Acra4|EBN1|ENFL1	cholinergic receptor, nicotinic, alpha polypeptide 4	protein-coding
upeaks-27713	chr3	22102439	22102752	+	0	NA	intron (NM_030732, intron 1 of 15)	B1_Mur4|SINE|Alu	25943	NM_030732	81004	Mm.202966	NM_030732	ENSMUSG00000027630	Tbl1xr1	8030499H02Rik|A630076E03Rik|AW539987|C21|C230089I12Rik|DC42|Ira1|TBLR1	transducin (beta)-like 1X-linked receptor 1	protein-coding
upeaks-14852	chr14	100228026	100228323	+	0	NA	Intergenic	Intergenic	-78378	NM_010636	16597	Mm.396499	NM_010636	ENSMUSG00000072294	Klf12	2700063E05Rik|AI225908|AI315654|AP-2rep|B130052C06Rik|D530033K05Rik	Kruppel-like factor 12	protein-coding
upeaks-36726	chr6	35338013	35338381	+	0	NA	Intergenic	Intergenic	7351	NR_040526	73409	Mm.69443	NR_040526	ENSMUSG00000107341	1700065J11Rik	-	RIKEN cDNA 1700065J11 gene	ncRNA
upeaks-16800	chr15	96210728	96211006	+	0	NA	Intergenic	RLTR17|LTR|ERVK	-12893	NR_040423	70040	Mm.437832	NR_040423		2610037D02Rik	AU024679	RIKEN cDNA 2610037D02 gene	ncRNA
upeaks-3860	chr10	40078058	40078310	+	0	NA	intron (NM_001114332, intron 2 of 5)	intron (NM_001114332, intron 2 of 5)	-52916	NM_144821	215929	Mm.55513	NM_144821	ENSMUSG00000038522	Mfsd4b1	AI317395|AI482555|Naglt1a	major facilitator superfamily domain containing 4B1	protein-coding
upeaks-20670	chr17	90209294	90209638	+	0	NA	intron (NM_001346959, intron 2 of 6)	L4_B_Mam|LINE|RTE-X	-121098	NM_001346962	18189	Mm.478418	NM_020252	ENSMUSG00000024109	Nrxn1	1700062G21Rik|9330127H16Rik|A230068P09Rik|mKIAA0578	neurexin I	protein-coding
upeaks-12341	chr13	64396982	64397291	+	0	NA	Intergenic	MLT1E1A|LTR|ERVL-MaLR	-26616	NM_009984	13039	Mm.930	NM_009984	ENSMUSG00000021477	Ctsl	1190035F06Rik|CatL|Ctsl1|MEP|fs|nkt	cathepsin L	protein-coding
upeaks-8278	chr11	100518318	100518660	+	0	NA	intron (NM_001199296, intron 6 of 28)	intron (NM_001199296, intron 6 of 28)	9511	NM_134037	104112	Mm.282039	NM_134037	ENSMUSG00000020917	Acly	A730098H14Rik|AW538652	ATP citrate lyase	protein-coding
upeaks-14281	chr14	58516541	58517057	+	0	NA	Intergenic	Intergenic	444113	NM_013518	14180	Mm.8846	NM_013518	ENSMUSG00000021974	Fgf9	Eks	fibroblast growth factor 9	protein-coding
upeaks-46792	chr9	114702012	114702306	+	0	NA	intron (NM_146229, intron 2 of 12)	L1MA8|LINE|L1	13328	NM_146229	235661	Mm.128627	NM_146229	ENSMUSG00000032435	Dync1li1	1110053F02Rik|Dnclic1|LIC-1	dynein cytoplasmic 1 light intermediate chain 1	protein-coding
upeaks-908	chr1	71944572	71944844	+	0	NA	Intergenic	Intergenic	56596	NR_027659	667931	Mm.214128	NR_027658	ENSMUSG00000099707	Gm8883	EG667931|Gm554	predicted gene 8883	ncRNA
upeaks-18113	chr16	55151838	55152051	+	0	NA	Intergenic	Intergenic	131293	NM_178720	239852	Mm.245045	NM_178720	ENSMUSG00000064310	Zpld1	9430016A21Rik	zona pellucida like domain containing 1	protein-coding
upeaks-42844	chr8	68336620	68336826	+	0	NA	intron (NM_028182, intron 7 of 8)	intron (NM_028182, intron 7 of 8)	-31736	NR_038181	73609	Mm.443247	NR_038181	ENSMUSG00000085197	1700125H03Rik	4930510D22Rik	RIKEN cDNA 1700125H03 gene	ncRNA
upeaks-18275	chr16	74504488	74504727	+	0	NA	Intergenic	Intergenic	-93695	NM_175549	268902	Mm.171736	NM_175549	ENSMUSG00000052516	Robo2	2600013A04Rik|9430089E08Rik|BB097918|D230004I22Rik|mKIAA1568	roundabout guidance receptor 2	protein-coding
upeaks-22164	chr18	84677001	84677508	+	0	NA	intron (NM_023149, intron 5 of 11)	intron (NM_023149, intron 5 of 11)	4805	NM_001289531	66054	Mm.29646	NM_023149	ENSMUSG00000024644	Cndp2	0610010E05Rik|C76600|Cn2|Dip-2|Pep-1|Pep1	CNDP dipeptidase 2 (metallopeptidase M20 family)	protein-coding
upeaks-10453	chr12	87397171	87397454	+	0	NA	Intergenic	PB1D10|SINE|Alu	-8957	NM_011479	20773	Mm.565	NM_011479	ENSMUSG00000021036	Sptlc2	LCB2|LCB2a|Spt2	serine palmitoyltransferase, long chain base subunit 2	protein-coding
upeaks-42015	chr8	10974249	10974533	+	0	NA	Intergenic	Intergenic	-33459	NR_046017	619321	Mm.403007	NR_046017	ENSMUSG00000096938	9530052E02Rik	-	RIKEN cDNA 9530052E02 gene	ncRNA
upeaks-31776	chr4	111451370	111451713	+	0	NA	intron (NR_033793, intron 4 of 5)	intron (NR_033793, intron 4 of 5)	36535	NM_026279	67621	Mm.45533	NM_026279	ENSMUSG00000028545	Bend5	2310026E23Rik	BEN domain containing 5	protein-coding
upeaks-5201	chr10	105020223	105020517	+	0	NA	Intergenic	Intergenic	554109	NM_177368	278279	Mm.25225	NM_177368	ENSMUSG00000036019	Tmtc2	8430438D04Rik|D330034A10Rik	transmembrane and tetratricopeptide repeat containing 2	protein-coding
upeaks-40754	chr7	101724848	101725047	+	0	NA	intron (NM_009191, intron 5 of 15)	intron (NM_009191, intron 5 of 15)	61179	NM_009191	20480	Mm.3990	NM_009191	ENSMUSG00000001829	Clpb	AL118244|Skd3	ClpB caseinolytic peptidase B	protein-coding
upeaks-26493	chr2	148114675	148114921	+	0	NA	Intergenic	LTR33A_|LTR|ERVL	-67829	NM_010446	15376	Mm.938	NM_010446	ENSMUSG00000037025	Foxa2	HNF3-beta|HNF3beta|Hnf-3b|Hnf3b|Tcf-3b|Tcf3b	forkhead box A2	protein-coding
upeaks-35732	chr5	136467552	136468031	+	0	NA	intron (NM_001291239, intron 2 of 22)	intron (NM_001291239, intron 2 of 22)	-91988	NR_030500	723975		NR_030500	ENSMUSG00000106479	Mir721	Mirn721|miRY|mir-721|mmu-mir-721	microRNA 721	ncRNA
upeaks-23741	chr2	11377211	11377599	+	0	NA	intron (NR_040615, intron 1 of 2)	MTEb|LTR|ERVL-MaLR	21095	NR_040615	77543	Mm.490670	NR_040615	ENSMUSG00000102674	8030442B05Rik	-	RIKEN cDNA 8030442B05 gene	ncRNA
upeaks-11773	chr13	39538077	39538433	+	0	NA	Intergenic	Intergenic	-577380	NM_001170431	108652	Mm.255506	NM_134060	ENSMUSG00000021432	Slc35b3	4921526O06Rik|AI428480|CGI-19|PABST2|PAPST2	solute carrier family 35, member B3	protein-coding
upeaks-37216	chr6	66479611	66479933	+	0	NA	Intergenic	Intergenic	-55696	NM_019499	56150	Mm.489653	NM_019499	ENSMUSG00000029910	Mad2l1	AA673185|MAD2	MAD2 mitotic arrest deficient-like 1	protein-coding
upeaks-37529	chr6	86499669	86500029	+	0	NA	Intergenic	Intergenic	-11622	NR_040292	381792	Mm.333223	NR_040292	ENSMUSG00000101655	2310040G24Rik	-	RIKEN cDNA 2310040G24 gene	ncRNA
upeaks-25004	chr2	73056199	73056484	+	0	NA	Intergenic	Intergenic	-75895	NM_001018042	20687	Mm.124328	NM_011450	ENSMUSG00000027109	Sp3	D130027J01Rik	trans-acting transcription factor 3	protein-coding
upeaks-37682	chr6	91745949	91746428	+	0	NA	intron (NM_009320, intron 10 of 14)	intron (NM_009320, intron 10 of 14)	61205	NM_001159507	243547	Mm.333264	NM_001033353	ENSMUSG00000030098	Grip2	-	glutamate receptor interacting protein 2	protein-coding
upeaks-41967	chr8	8801520	8802020	+	0	NA	Intergenic	Intergenic	-111233	NM_176849	234023	Mm.251655	NM_176849	ENSMUSG00000040459	Arglu1	9430010O03Rik|C130008N12	arginine and glutamate rich 1	protein-coding
upeaks-13503	chr14	18628290	18628489	+	0	NA	intron (NM_144839, intron 4 of 5)	intron (NM_144839, intron 4 of 5)	265238	NM_144839	218793	Mm.23551	NM_144839	ENSMUSG00000058317	Ube2e2	BC016265	ubiquitin-conjugating enzyme E2E 2	protein-coding
upeaks-38103	chr6	117526139	117527008	+	0	NA	Intergenic	Intergenic	225196	NR_045731	72263	Mm.443289	NR_045731	ENSMUSG00000099869	1700030F04Rik	-	RIKEN cDNA 1700030F04 gene	ncRNA
upeaks-36430	chr6	16524631	16524865	+	0	NA	Intergenic	Intergenic	373693	NM_031198	21426	Mm.36217	NM_031198	ENSMUSG00000029553	Tfec	BB107417|Tcfec|bHLHe34	transcription factor EC	protein-coding
upeaks-19551	chr17	35103335	35103654	+	0	NA	TTS (NM_178592)	TTS (NM_178592)	-4806	NM_148947	114652	Mm.222643	NM_148947	ENSMUSG00000034482	Ly6g5c	G5c|NG33	lymphocyte antigen 6 complex, locus G5C	protein-coding
upeaks-13932	chr14	41063706	41064021	+	0	NA	intron (NM_027717, intron 1 of 3)	RLTR1D|LTR|ERV1	5211	NM_027717	71200	Mm.443973	NM_027717	ENSMUSG00000021791	Dydc2	4933428D01Rik	DPY30 domain containing 2	protein-coding
upeaks-18886	chr17	11996278	11996726	+	0	NA	intron (NM_016694, intron 9 of 11)	intron (NM_016694, intron 9 of 11)	-113313	NR_045808	52027	Mm.442257	NR_045808		D17Ertd648e	-	DNA segment, Chr 17, ERATO Doi 648, expressed	ncRNA
upeaks-3302	chr10	5798614	5798875	+	0	NA	TTS (NM_025995)	TTS (NM_025995)	6721	NM_025995	67141	Mm.197520	NM_025995	ENSMUSG00000019773	Fbxo5	2510044I10Rik|C85305|Emi1|Fbxo31	F-box protein 5	protein-coding
upeaks-14215	chr14	55735365	55735638	+	0	NA	Intergenic	RLTR49|LTR|ERVK	10183	NM_026819	52585	Mm.21623	NM_026819	ENSMUSG00000002332	Dhrs1	1110029G07Rik|AW112170|D14Ertd484e	dehydrogenase/reductase (SDR family) member 1	protein-coding
upeaks-26640	chr2	152827728	152827945	+	0	NA	intron (NM_001289717, intron 2 of 2)	intron (NM_001289717, intron 2 of 2)	2881	NM_001289716	12048	Mm.238213	NM_009743	ENSMUSG00000007659	Bcl2l1	Bcl(X)L|Bcl-XL|Bcl2l|BclX|bcl-x|bcl2-L-1	BCL2-like 1	protein-coding
upeaks-27044	chr2	165968934	165969214	+	0	NA	Intergenic	Intergenic	-23563	NM_008679	17979	Mm.469663	NM_008679	ENSMUSG00000027678	Ncoa3	2010305B15Rik|AW321064|Actr|Aib1|KAT13B|Rac3|Src3|Tram-1|Tram1|bHLHe42|p/Cip|pCip	nuclear receptor coactivator 3	protein-coding
upeaks-17227	chr16	5515349	5515562	+	0	NA	Intergenic	PB1|SINE|Alu	-259499	NM_027446	70511	Mm.45780	NM_027446	ENSMUSG00000022544	Eef2kmt	5730409G15Rik|Fam86|Fam86a|eEF2-KMT	eukaryotic elongation factor 2 lysine methyltransferase	protein-coding
upeaks-33947	chr5	41680772	41680986	+	0	NA	intron (NR_132325, intron 3 of 5)	intron (NR_132325, intron 3 of 5)	26812	NM_001310592	100972	Mm.41555	NM_027295	ENSMUSG00000029128	Rab28	2700023P08Rik|AW496496	RAB28, member RAS oncogene family	protein-coding
upeaks-23787	chr2	13413517	13413918	+	0	NA	intron (NM_001081084, intron 27 of 66)	intron (NM_001081084, intron 27 of 66)	78159	NM_001081084	65969	Mm.313915	NM_001081084	ENSMUSG00000026726	Cubn	AA408369|AL022750|D2Wsu88e	cubilin (intrinsic factor-cobalamin receptor)	protein-coding
upeaks-840	chr1	65130299	65130589	+	0	NA	Intergenic	MTD|LTR|ERVL-MaLR	-7230	NM_175293	98303	Mm.348057	NM_175293	ENSMUSG00000044816	D630023F18Rik	AI314969	RIKEN cDNA D630023F18 gene	protein-coding
upeaks-15657	chr15	38278027	38278388	+	0	NA	Intergenic	Intergenic	22504	NM_001289471	21847	Mm.4292	NM_013692	ENSMUSG00000037465	Klf10	AI115143|EGR[a]|Egral|Gdnfif|TIEG-1|Tieg|Tieg1|mGIF	Kruppel-like factor 10	protein-coding
upeaks-40939	chr7	110990394	110990602	+	0	NA	Intergenic	RMER17C|LTR|ERVK	-8037	NM_194464	17540	Mm.250023	NM_010826	ENSMUSG00000005611	Mrvi1	BB115629|Irag|Ris1	MRV integration site 1	protein-coding
upeaks-36068	chr5	146290035	146290270	+	0	NA	intron (NM_153599, intron 6 of 12)	intron (NM_153599, intron 6 of 12)	58477	NM_153599	264064	Mm.260576	NM_153599	ENSMUSG00000029635	Cdk8	-	cyclin-dependent kinase 8	protein-coding
upeaks-22211	chr19	3414262	3414680	+	0	NA	promoter-TSS (NM_001329667)	promoter-TSS (NM_001329667)	73	NM_001329667	14419	Mm.4655	NM_010253	ENSMUSG00000024907	Gal	Galn	galanin	protein-coding
upeaks-24593	chr2	49349881	49350160	+	0	NA	Intergenic	Intergenic	-101466	NM_172663	227867	Mm.29167	NM_172663	ENSMUSG00000069495	Epc2	5830499L14|D2Ertd694e	enhancer of polycomb homolog 2 (Drosophila)	protein-coding
upeaks-16473	chr15	82218605	82218805	+	0	NA	Intergenic	ID_B1|SINE|B4	5631	NM_028075	72049	Mm.240047	NM_028075	ENSMUSG00000068105	Tnfrsf13c	2010006P15Rik|BAFF-R|Baffr|Bcmd|Bcmd-1|Bcmd1|Lvis22	tumor necrosis factor receptor superfamily, member 13c	protein-coding
upeaks-21560	chr18	57014740	57015135	+	0	NA	Intergenic	Intergenic	-39558	NM_029909	77422	Mm.256874	NM_029909	ENSMUSG00000024592	C330018D20Rik	AU018666	RIKEN cDNA C330018D20 gene	protein-coding
upeaks-42196	chr8	22426917	22427165	+	0	NA	intron (NM_020560, intron 5 of 6)	RLTR9E|LTR|ERVK	15701	NM_020560	57312	Mm.289402	NM_020560	ENSMUSG00000031533	Mrps31	1500002D03Rik|AA960481|Imogen38|Imogen44	mitochondrial ribosomal protein S31	protein-coding
upeaks-11838	chr13	43005133	43005348	+	0	NA	intron (NM_001005740, intron 2 of 12)	intron (NM_001005740, intron 2 of 12)	-117599	NM_001005748	218194	Mm.160124	NM_198419	ENSMUSG00000054728	Phactr1	9630030F18Rik|Rpel1	phosphatase and actin regulator 1	protein-coding
upeaks-37276	chr6	71130316	71130642	+	0	NA	intron (NM_178413, intron 8 of 9)	intron (NM_178413, intron 8 of 9)	13901	NM_178413	232078	Mm.37547	NM_178413	ENSMUSG00000054474	Thnsl2	BC051244|TSH2	threonine synthase-like 2 (bacterial)	protein-coding
upeaks-15260	chr15	5009644	5009901	+	0	NA	intron (NM_001243837, intron 12 of 17)	intron (NM_001243837, intron 12 of 17)	54001	NM_001243837	109828	Mm.208034	NM_001243837	ENSMUSG00000079105	C7	A530026G17|Gm1238	complement component 7	protein-coding
upeaks-3295	chr10	5289173	5289767	+	0	NA	exon (NM_001347711, exon 55 of 146)	exon (NM_001347711, exon 55 of 146)	-94763	NM_001079686	64009	Mm.331626	NM_022027	ENSMUSG00000096054	Syne1	8B|A330049M09Rik|BE692247|C130039F11Rik|CPG2|Myne1|mKIAA1756|myne-1	spectrin repeat containing, nuclear envelope 1	protein-coding
upeaks-26175	chr2	133768483	133768861	+	0	NA	Intergenic	Intergenic	203964	NR_037273	100526500		NR_037273	ENSMUSG00000093338	Mir3090	mmu-mir-3090	microRNA 3090	ncRNA
upeaks-13248	chr13	117006720	117006919	+	0	NA	intron (NM_001081009, intron 3 of 26)	intron (NM_001081009, intron 3 of 26)	18697	NM_001081009	52552	Mm.274466	NM_027272	ENSMUSG00000021725	Parp8	2810430O08Rik|ARTD16|D13Ertd275e	poly (ADP-ribose) polymerase family, member 8	protein-coding
upeaks-36419	chr6	15597280	15597654	+	0	NA	Intergenic	Intergenic	-123194	NM_175088	16543	Mm.1314	NM_175088	ENSMUSG00000041390	Mdfic	Kdt1|Mdfid	MyoD family inhibitor domain containing	protein-coding
upeaks-16324	chr15	78855487	78855793	+	0	NA	promoter-TSS (NM_025622)	promoter-TSS (NM_025622)	-111	NM_025622	107753	Mm.390793	NM_025622	ENSMUSG00000043501	Lgals2	2200008F12Rik|AI324147	lectin, galactose-binding, soluble 2	protein-coding
upeaks-31381	chr4	91061015	91061265	+	0	NA	Intergenic	ORR1E|LTR|ERVL-MaLR	310915	NM_207686	15569	Mm.318042	NM_010486	ENSMUSG00000008489	Elavl2	Hub|mel-N1	ELAV (embryonic lethal, abnormal vision, Drosophila)-like 2 (Hu antigen B)	protein-coding
upeaks-40199	chr7	73323678	73323898	+	0	NA	intron (NR_040325, intron 1 of 1)	ORR1E|LTR|ERVL-MaLR	13408	NR_105062	100505025	Mm.445959	NR_105062	ENSMUSG00000108530	LOC100505025	-	uncharacterized LOC100505025	ncRNA
upeaks-3712	chr10	29915636	29915835	+	0	NA	Intergenic	Intergenic	284805	NM_001109747	66311	Mm.251779	NM_001109747	ENSMUSG00000075266	Cenpw	2610036L11Rik|Cug2	centromere protein W	protein-coding
upeaks-3141	chr1	191874373	191874587	+	0	NA	Intergenic	Intergenic	-32301	NM_009579	22782	Mm.9024	NM_009579	ENSMUSG00000037434	Slc30a1	AI839647|C130040I11Rik|Znt1	solute carrier family 30 (zinc transporter), member 1	protein-coding
upeaks-5070	chr10	96188171	96188506	+	0	NA	Intergenic	Intergenic	-37869	NR_110448	74881	Mm.410819	NR_110448		4930459C07Rik	-	RIKEN cDNA 4930459C07 gene	ncRNA
upeaks-29311	chr3	116252243	116252469	+	0	NA	exon (NM_022427, exon 2 of 2)	exon (NM_022427, exon 2 of 2)	1128	NM_022427	64378	Mm.40025	NM_022427	ENSMUSG00000068696	Gpr88	AW061286|Strg	G-protein coupled receptor 88	protein-coding
upeaks-22201	chr18	90153000	90153199	+	0	NA	Intergenic	ORR1A4-int|LTR|ERVL-MaLR	-357055	NM_198295	67988	Mm.268041	NM_198295	ENSMUSG00000024614	Tmx3	6430411B10Rik|A730024F05Rik|AV259382|Txndc10|mKIAA1830	thioredoxin-related transmembrane protein 3	protein-coding
upeaks-34381	chr5	74921005	74921356	+	0	NA	Intergenic	Intergenic	-28014	NR_045866	619945	Mm.359372	NM_001037908	ENSMUSG00000072874	Gm6116	EG619945	predicted gene 6116	ncRNA
upeaks-23228	chr19	45661632	45661831	+	0	NA	Intergenic	ID_B1|SINE|B4	-1538	NM_013907	30838	Mm.254739	NM_013907	ENSMUSG00000040913	Fbxw4	Dac|Fbw4|SHFM3|SHSF3|dactylin|dactylyn	F-box and WD-40 domain protein 4	protein-coding
upeaks-23830	chr2	16773883	16774119	+	0	NA	Intergenic	Intergenic	239725	NR_040632	75069	Mm.50378	NR_040632		4930515L03Rik	-	RIKEN cDNA 4930515L03 gene	ncRNA
upeaks-13536	chr14	20111078	20111277	+	0	NA	Intergenic	Intergenic	-28005	NM_026209	67509	Mm.292423	NM_026209	ENSMUSG00000045107	Saysd1	1810063B07Rik|4930488P03Rik	SAYSVFN motif domain containing 1	protein-coding
upeaks-29001	chr3	100797568	100797880	+	0	NA	Intergenic	RLTR23|LTR|ERV1	-27735	NM_178594	242122	Mm.137467	NM_178594	ENSMUSG00000051076	Vtcn1	B7h4|B7s1|B7x|BC032925	V-set domain containing T cell activation inhibitor 1	protein-coding
upeaks-29980	chr3	146327596	146327925	+	0	NA	Intergenic	Intergenic	51184	NR_033542	100038607	Mm.365888	NR_033542	ENSMUSG00000105602	Gm10636	ENSMUSG00000074175	predicted gene 10636	ncRNA
upeaks-1064	chr1	76041314	76041592	+	0	NA	Intergenic	Intergenic	-447680	NR_038013	620079	Mm.378379	NR_038012	ENSMUSG00000100553	Gm17751	-	predicted gene, 17751	ncRNA
upeaks-20514	chr17	84137887	84138143	+	0	NA	Intergenic	Intergenic	49932	NM_001001806	12193	Mm.259321	NM_001001806	ENSMUSG00000045817	Zfp36l2	Brf2|ERF2|Tis11d	zinc finger protein 36, C3H type-like 2	protein-coding
upeaks-35949	chr5	142418001	142418242	+	0	NA	intron (NM_199068, intron 1 of 8)	intron (NM_199068, intron 1 of 8)	16624	NM_199068	17425	Mm.24214	NM_010812	ENSMUSG00000056493	Foxk1	A630048H08Rik|AI463295|ENSMUSG00000075577|Gm10868|Mnf	forkhead box K1	protein-coding
upeaks-14600	chr14	73017247	73017610	+	0	NA	Intergenic	Intergenic	-8175	NR_027860	668489	Mm.158324	NR_027860		Gm9199	EG668489	glycine cleavage system protein H (aminomethyl carrier) pseudogene	pseudo
upeaks-25192	chr2	84474040	84474622	+	0	NA	promoter-TSS (NM_011576)	promoter-TSS (NM_011576)	-157	NM_011576	21788	Mm.124316	NM_011576	ENSMUSG00000027082	Tfpi	A630013F22Rik|AW552122|EPI|LACI	tissue factor pathway inhibitor	protein-coding
upeaks-43938	chr8	115560868	115561481	+	0	NA	Intergenic	Intergenic	145720	NM_001025577	17132	Mm.275549	NM_001025577	ENSMUSG00000055435	Maf	2810401A20Rik|A230108G15Rik|AW047063|c-maf	avian musculoaponeurotic fibrosarcoma oncogene homolog	protein-coding
upeaks-18554	chr16	92566094	92566416	+	0	NA	Intergenic	Intergenic	68108	NM_172469	209195	Mm.44747	NM_172469	ENSMUSG00000022949	Clic6	5730466J16Rik|AL022908|AW045520|CLIC1L	chloride intracellular channel 6	protein-coding
upeaks-25459	chr2	102765026	102765260	+	0	NA	intron (NM_001077515, intron 8 of 10)	intron (NM_001077515, intron 8 of 10)	58705	NM_011393	20511	Mm.267547	NM_011393	ENSMUSG00000005089	Slc1a2	1700091C19Rik|2900019G14Rik|AI159670|Eaat2|GLT-1|GLT1|MGLT1	solute carrier family 1 (glial high affinity glutamate transporter), member 2	protein-coding
upeaks-3006	chr1	186925545	186925744	+	0	NA	Intergenic	Intergenic	-41772	NM_033077	110957	Mm.108054	NM_033077	ENSMUSG00000039224	D1Pas1	Pl10	DNA segment, Chr 1, Pasteur Institute 1	protein-coding
upeaks-33472	chr5	17724123	17724404	+	0	NA	intron (NM_013657, intron 17 of 17)	intron (NM_013657, intron 17 of 17)	111633	NM_007643	12491	Mm.18628	NM_007643	ENSMUSG00000002944	Cd36	FAT|GPIV|Scarb3	CD36 antigen	protein-coding
upeaks-27061	chr2	166460026	166460454	+	0	NA	Intergenic	Intergenic	12789	NR_015558	319684	Mm.399746	NR_015558		5031425F14Rik	-	RIKEN cDNA 5031425F14 gene	ncRNA
upeaks-26633	chr2	152739835	152740105	+	0	NA	Intergenic	Intergenic	3719	NM_010495	15901	Mm.444	NM_010495	ENSMUSG00000042745	Id1	AI323524|D2Wsu140e|Idb1|bHLHb24	inhibitor of DNA binding 1	protein-coding
upeaks-234	chr1	20790074	20790273	+	0	NA	Intergenic	Intergenic	-5903	NM_145856	257630	Mm.222807	NM_145856	ENSMUSG00000041872	Il17f	C87042|IL-17F	interleukin 17F	protein-coding
upeaks-33860	chr5	36373432	36373820	+	0	NA	intron (NM_030889, intron 1 of 26)	intron (NM_030889, intron 1 of 26)	24513	NM_030889	81840	Mm.34113	NM_030889	ENSMUSG00000029093	Sorcs2	N28137|mKIAA1329	sortilin-related VPS10 domain containing receptor 2	protein-coding
upeaks-45357	chr9	55090369	55090568	+	0	NA	Intergenic	Intergenic	-41924	NM_148944	108015	Mm.32694	NM_148944	ENSMUSG00000035200	Chrnb4	Acrb-4|Acrb4	cholinergic receptor, nicotinic, beta polypeptide 4	protein-coding
upeaks-38725	chr6	142428471	142428761	+	0	NA	exon (NM_145572, exon 14 of 17)	exon (NM_145572, exon 14 of 17)	15185	NM_001242345	319552	Mm.39649	NM_001242345	ENSMUSG00000071112	Spx	B230216G23Rik|Npq	spexin hormone	protein-coding
upeaks-21960	chr18	75465486	75465772	+	0	NA	intron (NM_201354, intron 10 of 11)	intron (NM_201354, intron 10 of 11)	-49016	NR_045879	100038353	Mm.440724	NR_045879	ENSMUSG00000097712	Gm10532	ENSMUSG00000073534	predicted gene 10532	ncRNA
upeaks-11382	chr13	21847935	21848176	+	0	NA	Intergenic	tRNA-Leu-TTA|tRNA|tRNA	14312	NM_001097979	665596	Mm.371766	NM_001097979	ENSMUSG00000069307	Hist1h2bq	Gm13646|OTTMUSG00000013203	histone cluster 1, H2bq	protein-coding
upeaks-44999	chr9	40323173	40323540	+	0	NA	intron (NM_172768, intron 4 of 19)	intron (NM_172768, intron 4 of 19)	-10116	NR_040728	73558	Mm.398307	NR_040728		1700110K17Rik	-	RIKEN cDNA 1700110K17 gene	ncRNA
upeaks-6083	chr11	11942556	11942915	+	0	NA	intron (NM_001177629, intron 10 of 15)	intron (NM_001177629, intron 10 of 15)	-44591	NM_001190448	13195	Mm.12906	NM_016672	ENSMUSG00000020182	Ddc	Aadc	dopa decarboxylase	protein-coding
upeaks-15964	chr15	62096433	62096638	+	0	NA	intron (NR_132746, intron 1 of 6)	intron (NR_132746, intron 1 of 6)	57278	NR_132746	19296	Mm.4608	NM_011222	ENSMUSG00000097039	Pvt1	Ayu21-84Imeg|Gt(pU21)84Imeg|Mis-1|Mlvi-1|Pvt-1	plasmacytoma variant translocation 1	ncRNA
upeaks-33491	chr5	20241599	20241851	+	0	NA	intron (NM_001170746, intron 6 of 22)	intron (NM_001170746, intron 6 of 22)	334207	NM_001170745	50791	Mm.332231	NM_015823	ENSMUSG00000040003	Magi2	AIP-1|Acvri1|Acvrinp1|Acvrip1|Magi-2|S-SCAM|mKIAA0705	membrane associated guanylate kinase, WW and PDZ domain containing 2	protein-coding
upeaks-36097	chr5	147057754	147058010	+	0	NA	intron (NM_080795, intron 1 of 9)	L1M5|LINE|L1	18690	NM_080795	140887	Mm.272203	NM_080795	ENSMUSG00000016520	Lnx2	9630046H24|AW209022	ligand of numb-protein X 2	protein-coding
upeaks-31408	chr4	95143657	95144039	+	0	NA	Intergenic	Intergenic	-91626	NM_010591	16476	Mm.275071	NM_010591	ENSMUSG00000052684	Jun	AP-1|Junc|c-jun	jun proto-oncogene	protein-coding
upeaks-28370	chr3	72517845	72518181	+	0	NA	Intergenic	LTRIS2|LTR|ERV1	448853	NM_001081137	69983	Mm.261054	NM_001081137	ENSMUSG00000027790	Sis	2010204N08Rik|SI|Si-s	sucrase isomaltase (alpha-glucosidase)	protein-coding
upeaks-32817	chr4	142047087	142047384	+	0	NA	intron (NM_145402, intron 1 of 2)	intron (NM_145402, intron 1 of 2)	29337	NR_131014	78917	Mm.139995	NR_131014	ENSMUSG00000085761	4930455G09Rik	-	RIKEN cDNA 4930455G09 gene	ncRNA
upeaks-20307	chr17	74870550	74870791	+	0	NA	Intergenic	Intergenic	-134859	NM_019919	268977	Mm.269747	NM_019919	ENSMUSG00000001870	Ltbp1	9430031G15Rik|9830146M04|Ltbp-1|Ltbp1L|TGF-beta1-BP-1|Tgfb|b2b1000Clo	latent transforming growth factor beta binding protein 1	protein-coding
upeaks-2944	chr1	184851254	184851465	+	0	NA	Intergenic	Intergenic	-5512	NM_133684	67247	Mm.177724	NM_133684	ENSMUSG00000073481	2018-03-02	2810484M10Rik|Mosc2|mARC1	mitochondrial amidoxime reducing component 2	protein-coding
upeaks-45449	chr9	58053205	58053404	+	0	NA	intron (NM_001311085, intron 11 of 18)	intron (NM_001311085, intron 11 of 18)	21030	NM_001243265	330951	Mm.406992	NM_001243265		Gm16130	E330033L03|OTTMUSG00000030814	predicted gene 16130	protein-coding
upeaks-25661	chr2	113839474	113839892	+	0	NA	exon (NM_181416, exon 8 of 12)	exon (NM_181416, exon 8 of 12)	8978	NM_181416	228482	Mm.45753	NM_181416	ENSMUSG00000041219	Arhgap11a	6530401L14Rik|mKIAA0013	Rho GTPase activating protein 11A	protein-coding
upeaks-2999	chr1	186684197	186684427	+	0	NA	intron (NM_009367, intron 1 of 6)	intron (NM_009367, intron 1 of 6)	21677	NM_001329107	21808	Mm.18213	NM_009367	ENSMUSG00000039239	Tgfb2	BB105277|Tgf-beta2|Tgfb-2	transforming growth factor, beta 2	protein-coding
upeaks-23931	chr2	20936682	20937163	+	0	NA	intron (NM_001128084, intron 1 of 24)	MER68|LTR|ERVL	30799	NM_001081364	71435	Mm.28507	NM_001081364	ENSMUSG00000036591	Arhgap21	5530401C11Rik|AA416458|ARHGAP10	Rho GTPase activating protein 21	protein-coding
upeaks-6650	chr11	48873016	48873286	+	0	NA	Intergenic	Intergenic	-1805	NM_008326	15944	Mm.29938	NM_008326	ENSMUSG00000046879	Irgm1	Ifggd3|Ifi1|Iigp3|Iipg3|Irgm|LRG-47	immunity-related GTPase family M member 1	protein-coding
upeaks-42298	chr8	26305116	26305335	+	0	NA	Intergenic	Intergenic	147056	NM_199042	73754	Mm.383241	NM_199042	ENSMUSG00000037214	Thap1	4833431A01Rik|AW490810	THAP domain containing, apoptosis associated protein 1	protein-coding
upeaks-15829	chr15	54836010	54836350	+	0	NA	Intergenic	Intergenic	83966	NM_001285995	18606	Mm.250256	NM_015744	ENSMUSG00000022425	Enpp2	ATX|E-NPP 2|Npps2|PD-Ialpha|Pdnp2|lysoPLD	ectonucleotide pyrophosphatase/phosphodiesterase 2	protein-coding
upeaks-22384	chr19	6104576	6104775	+	0	NA	Intergenic	Intergenic	-1123	NM_001009546	381204	Mm.359041	NM_001009546	ENSMUSG00000054999	Naaladl1	Gm964|Naaladasel	N-acetylated alpha-linked acidic dipeptidase-like 1	protein-coding
upeaks-40197	chr7	73195370	73195736	+	0	NA	Intergenic	Intergenic	-93485	NR_046024	625243	Mm.261798	NR_046024	ENSMUSG00000108383	Gm6567	-	predicted gene 6567	ncRNA
upeaks-11167	chr13	6664229	6664433	+	0	NA	Intergenic	RLTR9D|LTR|ERVK	-15560	NM_019703	56421	Mm.273874	NM_019703	ENSMUSG00000021196	Pfkp	1200015H23Rik|9330125N24Rik|ATP-PFK|PFK-C|PFK-P	phosphofructokinase, platelet	protein-coding
upeaks-8680	chr11	110836759	110836968	+	0	NA	Intergenic	MTD|LTR|ERVL-MaLR	-131170	NM_010604	16517	Mm.30176	NM_010604	ENSMUSG00000051497	Kcnj16	6430410F18Rik|AI132396|Kir5.1	potassium inwardly-rectifying channel, subfamily J, member 16	protein-coding
upeaks-5940	chr11	5114877	5115279	+	0	NA	intron (NM_080595, intron 13 of 14)	intron (NM_080595, intron 13 of 14)	14913	NM_001290493	279766	Mm.260866	NM_177370	ENSMUSG00000034175	Rhbdd3	Ptag	rhomboid domain containing 3	protein-coding
upeaks-569	chr1	45917163	45917798	+	0	NA	intron (NM_016917, intron 5 of 7)	intron (NM_016917, intron 5 of 7)	8114	NM_016917	53945	Mm.28756	NM_016917	ENSMUSG00000025993	Slc40a1	Dusg|Fpn1|IREG1|MTP|MTP1|Ol5|Pcm|Slc11a3|Slc39a1	solute carrier family 40 (iron-regulated transporter), member 1	protein-coding
upeaks-25882	chr2	122266822	122267180	+	0	NA	Intergenic	Intergenic	31164	NM_177610	214593	Mm.358846	NM_177610	ENSMUSG00000068452	Duox2	A430065P05Rik|LNOX2|NOXEF2|P138-TOX|THOX2	dual oxidase 2	protein-coding
upeaks-43305	chr8	85567906	85568108	+	0	NA	Intergenic	MTD|LTR|ERVL-MaLR	-12736	NM_019794	56445	Mm.475573	NM_019794	ENSMUSG00000031701	Dnaja2	1500017M13Rik|2010206B19Rik|DNAJ|DNJ3|Dnaj3|HIRIP4|PRO3015|mDj3	DnaJ heat shock protein family (Hsp40) member A2	protein-coding
upeaks-29543	chr3	128200600	128200969	+	0	NA	intron (NR_045704, intron 2 of 5)	intron (NR_045704, intron 2 of 5)	30821	NR_045704	402774	Mm.209170	NR_045704	ENSMUSG00000105816	D030025E07Rik	-	RIKEN cDNA D030025E07 gene	ncRNA
upeaks-47933	chrX	145569441	145569800	+	0	NA	Intergenic	MLT1A1|LTR|ERVL-MaLR	-81981	NM_001290274	27494	Mm.100068	NM_153319	ENSMUSG00000041688	Amot	CAG-2|D0Kist1|Sii6	angiomotin	protein-coding
upeaks-31624	chr4	105649024	105649409	+	0	NA	Intergenic	Intergenic	491869	NM_080555	67916	Mm.348326	NM_080555	ENSMUSG00000028517	Plpp3	1110003O22Rik|2610002D05Rik|AV025606|D4Bwg0538e|D4Bwg1535e|Lpp3|Ppab2b|Ppap2b	phospholipid phosphatase 3	protein-coding
upeaks-10107	chr12	76310135	76310374	+	0	NA	intron (NM_138745, intron 22 of 27)	B3A|SINE|B2	-14637	NM_001101471	238276	Mm.311452	NM_001101471	ENSMUSG00000021057	Akap5	3526401B18Rik|AKAP 150|AKAP-5|AKAP150|BB098886|Gm258|P150	A kinase (PRKA) anchor protein 5	protein-coding
upeaks-179	chr1	15920115	15920481	+	0	NA	Intergenic	RLTR1B|LTR|ERV1	-27576	NM_001033288	226866	Mm.131665	NM_001033288	ENSMUSG00000032719	Sbspon	Gm106|Rpesp	somatomedin B and thrombospondin, type 1 domain containing	protein-coding
upeaks-18362	chr16	84825014	84825213	+	0	NA	3' UTR (NM_023844, exon 10 of 10)	3' UTR (NM_023844, exon 10 of 10)	9885	NM_001302216	11957	Mm.353	NM_016755	ENSMUSG00000022890	Atp5j	CF6	ATP synthase, H+ transporting, mitochondrial F0 complex, subunit F	protein-coding
upeaks-20106	chr17	64938640	64938869	+	0	NA	Intergenic	Lx9|LINE|L1	-102683	NM_030031	78057	Mm.109380	NM_030031	ENSMUSG00000024088	4930583I09Rik	-	RIKEN cDNA 4930583I09 gene	protein-coding
upeaks-16142	chr15	75401666	75401944	+	0	NA	Intergenic	ERVB5_1-LTR_MM|LTR|ERVK	30024	NR_108041	105892	Mm.38909	NM_001039720	ENSMUSG00000053168	9030619P08Rik	-	lymphocyte antigen 6 complex pseudogene	pseudo
upeaks-26267	chr2	138290220	138290460	+	0	NA	Intergenic	Intergenic	11847	NM_145534	228662	Mm.153405	NM_145534	ENSMUSG00000062098	Btbd3	mKIAA0952	BTB (POZ) domain containing 3	protein-coding
upeaks-2634	chr1	172048305	172048582	+	0	NA	Intergenic	Intergenic	9153	NM_010916	18071	Mm.2474	NM_010916	ENSMUSG00000051251	Nhlh1	Hen1|Nscl|Tal2|bHLHa35	nescient helix loop helix 1	protein-coding
upeaks-42067	chr8	12799173	12799434	+	0	NA	intron (NR_121603, intron 1 of 29)	intron (NR_121603, intron 1 of 29)	32616	NR_045775	100504249	Mm.441494	NR_045775	ENSMUSG00000084780	Gm15350	OTTMUSG00000020611	predicted gene 15350	ncRNA
upeaks-18075	chr16	50489377	50489631	+	0	NA	Intergenic	MIRb|SINE|MIR	-36741	NR_040380	619312	Mm.427671	NR_040379		G730013B05Rik	linc-Cblb|linc1610	RIKEN cDNA G730013B05 gene	ncRNA
upeaks-6155	chr11	19194499	19194818	+	0	NA	Intergenic	Intergenic	129383	NR_046037	74059	Mm.292321	NR_046037	ENSMUSG00000086025	4933406G16Rik	-	RIKEN cDNA 4933406G16 gene	ncRNA
upeaks-17369	chr16	16253381	16254013	+	0	NA	intron (NM_026163, intron 6 of 12)	intron (NM_026163, intron 6 of 12)	40352	NM_026163	67451	Mm.2252	NM_026163	ENSMUSG00000041957	Pkp2	1200008D14Rik|1200012P04Rik|AA516617|Pkp2l	plakophilin 2	protein-coding
upeaks-34240	chr5	65901939	65902174	+	0	NA	Intergenic	RMER16C|LTR|ERVK	38487	NM_001081105	74734	Mm.20323	NM_001081105	ENSMUSG00000029204	Rhoh	5830400A04Rik|AU019774|Arhh	ras homolog family member H	protein-coding
upeaks-43780	chr8	108819322	108819548	+	0	NA	intron (NM_007496, intron 3 of 9)	intron (NM_007496, intron 3 of 9)	104791	NM_007496	11906	Mm.416972	NM_007496	ENSMUSG00000038872	Zfhx3	A230102L03Rik|Atbf1|Sci|WBP9|mKIAA4228	zinc finger homeobox 3	protein-coding
upeaks-43691	chr8	106031945	106032162	+	0	NA	intron (NM_025518, intron 5 of 15)	intron (NM_025518, intron 5 of 15)	-20567	NM_028038	71986	Mm.307515	NM_028038	ENSMUSG00000045538	Ddx28	2410004K13Rik|AI449652|Mddx28	DEAD (Asp-Glu-Ala-Asp) box polypeptide 28	protein-coding
upeaks-17590	chr16	24103041	24103328	+	0	NA	Intergenic	Intergenic	-114572	NM_009744	12053	Mm.347398	NM_009744	ENSMUSG00000022508	Bcl6	Bcl5	B cell leukemia/lymphoma 6	protein-coding
upeaks-36424	chr6	16152763	16153164	+	0	NA	Intergenic	Intergenic	432302	NM_175088	16543	Mm.1314	NM_175088	ENSMUSG00000041390	Mdfic	Kdt1|Mdfid	MyoD family inhibitor domain containing	protein-coding
upeaks-21941	chr18	75239882	75240081	+	0	NA	intron (NM_027727, intron 15 of 16)	PB1D9|SINE|Alu	57336	NR_045394	100503117	Mm.250517	NR_045393	ENSMUSG00000102047	2010010A06Rik	5033420E22Rik	RIKEN cDNA 2010010A06 gene	ncRNA
upeaks-44600	chr9	16988168	16988382	+	0	NA	Intergenic	Intergenic	-610044	NM_001080814	270120	Mm.195010	NM_001080814	ENSMUSG00000074505	Fat3	9430076A06Rik|D430038H04Rik|Gm1132|Gm510|MFAT3F	FAT atypical cadherin 3	protein-coding
upeaks-19791	chr17	46680705	46681381	+	0	NA	promoter-TSS (NM_010787)	promoter-TSS (NM_010787)	57	NM_001277309	17256	Mm.329083	NM_010787	ENSMUSG00000002768	Mea1	Mea-1	male enhanced antigen 1	protein-coding
upeaks-42310	chr8	26835027	26835499	+	0	NA	Intergenic	Intergenic	-10840	NR_045904	72316	Mm.490534	NR_045904	ENSMUSG00000100335	2310008N11Rik	-	RIKEN cDNA 2310008N11 gene	ncRNA
upeaks-35296	chr5	121009454	121009780	+	0	NA	promoter-TSS (NM_011286)	promoter-TSS (NM_011286)	-79	NM_011286	19894	Mm.181166	NM_011286	ENSMUSG00000029608	Rph3a	2900002P20Rik|AU022689|AW108370	rabphilin 3A	protein-coding
upeaks-22970	chr19	36796946	36797383	+	0	NA	Intergenic	Intergenic	-37068	NM_001163635	74493	Mm.249310	NM_001163635	ENSMUSG00000024811	Tnks2	5430432P15Rik|AA517131|AI662480|ARTD6|TNKS-2|Tank2	tankyrase, TRF1-interacting ankyrin-related ADP-ribose polymerase 2	protein-coding
upeaks-9896	chr12	59095229	59095745	+	0	NA	promoter-TSS (NM_177321)	promoter-TSS (NM_177321)	-313	NM_177321	338320	Mm.213215	NM_146034	ENSMUSG00000021000	Mia2	Ctage5|D12Bwg0579e|Mea6|Mgea|Mgea6	melanoma inhibitory activity 2	protein-coding
upeaks-17619	chr16	26377350	26377614	+	0	NA	Intergenic	MLT2C2|LTR|ERVL	-5643	NM_016674	12737	Mm.289441	NM_016674	ENSMUSG00000022512	Cldn1	AI596271	claudin 1	protein-coding
upeaks-18681	chr16	97241165	97241627	+	0	NA	Intergenic	RLTR1D|LTR|ERV1	-70661	NM_031174	13508	Mm.102437	NM_031174	ENSMUSG00000050272	Dscam	4932410A21Rik	Down syndrome cell adhesion molecule	protein-coding
upeaks-1153	chr1	82815722	82816271	+	0	NA	Intergenic	Intergenic	-23464	NM_001347077	15463	Mm.392569	NM_010472	ENSMUSG00000026159	Agfg1	AU045498|C130049H11Rik|C85612|D730048C23Rik|Hrb|RAB|Rip	ArfGAP with FG repeats 1	protein-coding
upeaks-4406	chr10	71120395	71120594	+	0	NA	intron (NM_031397, intron 1 of 20)	intron (NM_031397, intron 1 of 20)	39196	NM_001347189	83675	Mm.286834	NM_031397	ENSMUSG00000014329	Bicc1	Bic-C|bpk|jcpk	BicC family RNA binding protein 1	protein-coding
upeaks-35431	chr5	124432457	124432709	+	0	NA	Intergenic	B3|SINE|B2	-6669	NM_001081203	243272	Mm.23879	NM_001081203	ENSMUSG00000038095	Sbno1	9330180L10Rik|AI849128|AW557836|BC021875|Sbno|mSno1|sno	strawberry notch homolog 1 (Drosophila)	protein-coding
upeaks-4915	chr10	88374308	88374626	+	0	NA	Intergenic	Intergenic	-4945	NM_001004164	432486	Mm.335190	NM_001004164	ENSMUSG00000035311	Gnptab	EG432486|mKIAA1208	N-acetylglucosamine-1-phosphate transferase, alpha and beta subunits	protein-coding
upeaks-39808	chr7	45097534	45097756	+	0	NA	intron (NM_010189, intron 4 of 6)	intron (NM_010189, intron 4 of 6)	-5432	NM_026555	52377	Mm.29997	NM_026555	ENSMUSG00000019539	Rcn3	6030455P07Rik|D530026G20Rik|D7Ertd671e|RLP49	reticulocalbin 3, EF-hand calcium binding domain	protein-coding
upeaks-18260	chr16	72830754	72830974	+	0	NA	intron (NM_019413, intron 2 of 28)	intron (NM_019413, intron 2 of 28)	167715	NM_019413	19876	Mm.310772	NM_019413	ENSMUSG00000022883	Robo1	AW494633|AW742721|DUTT1|Gm310	roundabout guidance receptor 1	protein-coding
upeaks-35240	chr5	119055457	119055819	+	0	NA	Intergenic	Intergenic	-52598	NR_040693	73477	Mm.410863	NR_040693	ENSMUSG00000100573	1700081H04Rik	-	RIKEN cDNA 1700081H04 gene	ncRNA
upeaks-13609	chr14	22668461	22669190	+	0	NA	intron (NM_028275, intron 5 of 6)	intron (NM_028275, intron 5 of 6)	-126027	NR_046307	74896	Mm.444661	NR_046307		4930405A10Rik	4930456G20Rik	RIKEN cDNA 4930405A10 gene	ncRNA
upeaks-22911	chr19	32808767	32808974	+	0	NA	intron (NM_008960, intron 5 of 8)	intron (NM_008960, intron 5 of 8)	51293	NM_008960	19211	Mm.245395	NM_008960	ENSMUSG00000013663	Pten	2310035O07Rik|A130070J02Rik|AI463227|B430203M17Rik|MMAC1|TEP1	phosphatase and tensin homolog	protein-coding
upeaks-18380	chr16	85680449	85680873	+	0	NA	Intergenic	Intergenic	122452	NM_009621	11504	Mm.1421	NM_009621	ENSMUSG00000022893	Adamts1	ADAM-TS1|ADAMTS|ADAMTS-1|C3-C5|METH-1|METH1	a disintegrin-like and metallopeptidase (reprolysin type) with thrombospondin type 1 motif, 1	protein-coding
upeaks-44034	chr8	119423938	119424540	+	0	NA	Intergenic	Intergenic	-12923	NM_027950	71839	Mm.272357	NM_027950	ENSMUSG00000074063	Osgin1	1700012B18Rik|Okl38	oxidative stress induced growth inhibitor 1	protein-coding
upeaks-21502	chr18	53590754	53591143	+	0	NA	Intergenic	Intergenic	-57203	NR_040349	100502945	Mm.376937	NR_040349		Gm19466	-	predicted gene, 19466	ncRNA
upeaks-22652	chr19	18757661	18757996	+	0	NA	intron (NM_153417, intron 1 of 38)	intron (NM_153417, intron 1 of 38)	7845	NM_153417	225997	Mm.215171	NM_153417	ENSMUSG00000024727	Trpm6	CHAK2|TRPM6/CHAK2	transient receptor potential cation channel, subfamily M, member 6	protein-coding
upeaks-15270	chr15	5235611	5235834	+	0	NA	intron (NM_008965, intron 2 of 2)	intron (NM_008965, intron 2 of 2)	8465	NM_001136079	19219	Mm.18509	NM_008965	ENSMUSG00000039942	Ptger4	EP4|Ptgerep4	prostaglandin E receptor 4 (subtype EP4)	protein-coding
upeaks-5294	chr10	110733406	110733679	+	0	NA	Intergenic	Intergenic	-11923	NM_178609	52679	Mm.11747	NM_178609	ENSMUSG00000020185	E2f7	A630014C11Rik|D10Ertd739e	E2F transcription factor 7	protein-coding
upeaks-4711	chr10	81014771	81015223	+	0	NA	promoter-TSS (NM_010319)	promoter-TSS (NM_010319)	-72	NM_010319	14708	Mm.222496	NM_010319	ENSMUSG00000048240	Gng7	AI840417	guanine nucleotide binding protein (G protein), gamma 7	protein-coding
upeaks-29025	chr3	101517015	101517488	+	0	NA	Intergenic	Intergenic	87456	NM_144900	11928	Mm.193670	NM_144900	ENSMUSG00000033161	Atp1a1	Atpa-1|BC010319	ATPase, Na+/K+ transporting, alpha 1 polypeptide	protein-coding
upeaks-26485	chr2	148004944	148005508	+	0	NA	Intergenic	Intergenic	40238	NM_001291067	15376	Mm.938	NM_010446	ENSMUSG00000037025	Foxa2	HNF3-beta|HNF3beta|Hnf-3b|Hnf3b|Tcf-3b|Tcf3b	forkhead box A2	protein-coding
upeaks-18541	chr16	92336357	92336646	+	0	NA	Intergenic	Intergenic	-15060	NM_029252	75328	Mm.72970	NM_029252	ENSMUSG00000051728	4930563D23Rik	-	RIKEN cDNA 4930563D23 gene	protein-coding
upeaks-44848	chr9	31538874	31539192	+	0	NA	Intergenic	MLT2B1|LTR|ERVL	-74795	NM_144936	235135	Mm.390134	NM_144936	ENSMUSG00000041737	Tmem45b	BC018222	transmembrane protein 45b	protein-coding
upeaks-7612	chr11	79654527	79654828	+	0	NA	intron (NM_175543, intron 3 of 14)	intron (NM_175543, intron 3 of 14)	20409	NR_045898	72218	Mm.443271	NR_045898	ENSMUSG00000086569	Rab11fip4os2	1700020F10Rik|4930542H20Rik|Rab11fib4os2	RAB11 family interacting protein 4 (class II), opposite strand 2	ncRNA
upeaks-1326	chr1	88399338	88399624	+	0	NA	Intergenic	Intergenic	-7529	NM_029269	75396	Mm.173058	NM_029269	ENSMUSG00000026295	Spp2	0610038O04Rik|pp-24|spp24	secreted phosphoprotein 2	protein-coding
upeaks-28951	chr3	98236370	98236650	+	0	NA	3' UTR (NM_026328, exon 6 of 6)	3' UTR (NM_026328, exon 6 of 6)	14354	NM_026328	67709	Mm.46306	NM_026328	ENSMUSG00000027876	Reg4	2010002L15Rik|GISP|RELP	regenerating islet-derived family, member 4	protein-coding
upeaks-2016	chr1	138905426	138905633	+	0	NA	Intergenic	MIR|SINE|MIR	-28579	NR_138576	75546	Mm.71176	NR_138576	ENSMUSG00000099808	1700019P21Rik	-	RIKEN cDNA 1700019P21 gene	ncRNA
upeaks-34113	chr5	53470132	53470488	+	0	NA	Intergenic	Intergenic	-85469	NM_001080928	19664	Mm.209292	NM_009035	ENSMUSG00000039191	Rbpj	AI843960|CBF1|Igkjrb|Igkrsbp|RBP-J|RBP-J kappa|RBP-Jkappa|RBPjk|Rbpsuh	recombination signal binding protein for immunoglobulin kappa J region	protein-coding
upeaks-34032	chr5	47556814	47557069	+	0	NA	Intergenic	Intergenic	-426214	NR_111900	20563	Mm.289739	NM_178804	ENSMUSG00000031558	Slit2	Drad-1|E030015M03Rik|E130320P19Rik|Slil3|mKIAA4141|slit-2	slit homolog 2 (Drosophila)	protein-coding
upeaks-47250	chrX	18461308	18461682	+	0	NA	promoter-TSS (NM_175228)	promoter-TSS (NM_175228)	-98	NR_132634	75905	Mm.159617	NM_175228	ENSMUSG00000037358	4930578C19Rik	-	RIKEN cDNA 4930578C19 gene	protein-coding
upeaks-11755	chr13	38193468	38193745	+	0	NA	exon (NM_023842, exon 23 of 24)	exon (NM_023842, exon 23 of 24)	-11333	NM_026382	67797	Mm.250783	NM_026382	ENSMUSG00000021431	Snrnp48	1110050F08Rik|6530403A03Rik|C6orf151	small nuclear ribonucleoprotein 48 (U11/U12)	protein-coding
upeaks-14579	chr14	71808857	71809315	+	0	NA	Intergenic	Intergenic	-47623	NR_046274	74667	Mm.159286	NR_046274		4930434J06Rik	-	RIKEN cDNA 4930434J06 gene	ncRNA
upeaks-38417	chr6	128337512	128337711	+	0	NA	intron (NM_011657, intron 2 of 10)	intron (NM_011657, intron 2 of 10)	18240	NM_011657	22158	Mm.291783	NM_011657	ENSMUSG00000001521	Tulp3	2310022L06Rik|AI316887	tubby-like protein 3	protein-coding
upeaks-29843	chr3	142107808	142108013	+	0	NA	intron (NM_001277216, intron 1 of 11)	PB1D10|SINE|Alu	61318	NM_001277217	12167	Mm.39089	NM_007560	ENSMUSG00000052430	Bmpr1b	AI385617|ALK-6|AV355320|Acvrlk6|Alk6|BMPR-1B|BMPR-IB|CFK-43a|SKR6	bone morphogenetic protein receptor, type 1B	protein-coding
upeaks-4338	chr10	68229919	68230530	+	0	NA	intron (NM_023598, intron 3 of 9)	intron (NM_023598, intron 3 of 9)	48502	NM_023598	71371	Mm.440357	NM_023598	ENSMUSG00000019947	Arid5b	4930580B11|5430435G07Rik|AI467247|Desrt|Mrf2|Mrf2alpha|Mrf2beta	AT rich interactive domain 5B (MRF1-like)	protein-coding
upeaks-25610	chr2	110210595	110210898	+	0	NA	Intergenic	Intergenic	94979	NM_130452	170442	Mm.27335	NM_130452	ENSMUSG00000041660	Bbox1	AI874739	butyrobetaine (gamma), 2-oxoglutarate dioxygenase 1 (gamma-butyrobetaine hydroxylase)	protein-coding
upeaks-45670	chr9	65163109	65163392	+	0	NA	intron (NM_008988, intron 2 of 13)	CpG	22061	NM_008988	19289	Mm.41529	NM_008988	ENSMUSG00000032394	Igdcc3	2810401C09Rik|AI851425|Punc|WI-14920	immunoglobulin superfamily, DCC subclass, member 3	protein-coding
upeaks-29943	chr3	145740020	145740292	+	0	NA	Intergenic	Intergenic	-18536	NM_026993	69219	Mm.234247	NM_026993	ENSMUSG00000028194	Ddah1	2410006N07Rik|2510015N06Rik|AI987801|AW050362	dimethylarginine dimethylaminohydrolase 1	protein-coding
upeaks-3620	chr10	24629104	24629439	+	0	NA	Intergenic	Intergenic	33829	NM_010217	14219	Mm.390287	NM_010217	ENSMUSG00000019997	Ctgf	Ccn2|Fisp12|Hcs24|fisp-12	connective tissue growth factor	protein-coding
upeaks-274	chr1	23200513	23200810	+	0	NA	Intergenic	Intergenic	-71608	NR_029533	387225		NR_029533	ENSMUSG00000065405	Mir30a	Mirn30a|mir-30a|mmu-mir-30a	microRNA 30a	ncRNA
upeaks-46773	chr9	114391570	114391915	+	0	NA	Intergenic	RSINE1|SINE|B4	-1030	NM_019922	56693	Mm.20904	NM_019922	ENSMUSG00000032431	Crtap	5730529N23Rik|CASP|Leprel3|P3h5	cartilage associated protein	protein-coding
upeaks-3746	chr10	31544745	31544944	+	0	NA	intron (NM_001146349, intron 1 of 5)	MLTR11B|LTR|ERVK	64881	NM_001146349	268291	Mm.295212	NM_001146349	ENSMUSG00000063760	Rnf217	AU016819|Ibrdc1	ring finger protein 217	protein-coding
upeaks-30832	chr4	48686735	48686972	+	0	NA	Intergenic	LTRIS2|LTR|ERV1	23339	NM_026509	68016	Mm.133444	NM_026509	ENSMUSG00000028348	Murc	2310039E09Rik	muscle-related coiled-coil protein	protein-coding
upeaks-45443	chr9	57861929	57862164	+	0	NA	Intergenic	Intergenic	-27812	NM_019689	56380	Mm.425588	NM_019689	ENSMUSG00000004661	Arid3b	Bdp|Dri2	AT rich interactive domain 3B (BRIGHT-like)	protein-coding
upeaks-16270	chr15	77397617	77397983	+	0	NA	intron (NM_029419, intron 1 of 5)	intron (NM_029419, intron 1 of 5)	1310	NM_001164640	75761	Mm.232636	NM_029419	ENSMUSG00000010601	Apol7a	9130022K13Rik|Apol3	apolipoprotein L 7a	protein-coding
upeaks-34706	chr5	99632953	99633382	+	0	NA	intron (NR_030692, intron 1 of 3)	intron (NR_030692, intron 1 of 3)	95893	NR_030692	319818	Mm.295233	NR_030692	ENSMUSG00000089809	A930011G23Rik	-	RIKEN cDNA A930011G23 gene	ncRNA
upeaks-164	chr1	14854957	14855254	+	0	NA	Intergenic	Intergenic	63757	NM_177781	277328	Mm.186329	NM_177781	ENSMUSG00000032769	Trpa1	Anktm1|TRPA1b	transient receptor potential cation channel, subfamily A, member 1	protein-coding
upeaks-16645	chr15	88758136	88758400	+	0	NA	intron (NM_181412, intron 2 of 2)	intron (NM_181412, intron 2 of 2)	6557	NM_181412	223773	Mm.396622	NM_181412	ENSMUSG00000034333	Zbed4	1700009F06Rik	zinc finger, BED type containing 4	protein-coding
upeaks-9496	chr12	27150896	27151095	+	0	NA	intron (NR_045868, intron 2 of 3)	intron (NR_045868, intron 2 of 3)	9521	NR_045869	636791	Mm.423496	NM_001039248	ENSMUSG00000094002	Gm9866	EG636791|ENSMUSG00000052076	predicted gene 9866	ncRNA
upeaks-34624	chr5	93040099	93040455	+	0	NA	TTS (NM_175270)	TTS (NM_175270)	4745	NM_175270	78088	Mm.245085	NM_175270	ENSMUSG00000045314	Sowahb	5730467H21Rik|Ankrd56	sosondowah ankyrin repeat domain family member B	protein-coding
upeaks-25023	chr2	73867843	73868060	+	0	NA	intron (NM_001284374, intron 3 of 11)	LSU-rRNA_Hsa|rRNA|rRNA	24688	NM_001284371	11909	Mm.209903	NM_009715	ENSMUSG00000027104	Atf2	Atf-2|CRE-BP|Creb2|D130078H02Rik|D18875|Tg(Gzma-Klra1)7Wum|mXBP	activating transcription factor 2	protein-coding
upeaks-46347	chr9	98489596	98489841	+	0	NA	promoter-TSS (NM_009034)	promoter-TSS (NM_009034)	-819	NM_009034	19660	Mm.12825	NM_009034	ENSMUSG00000032454	Rbp2	Crbp-2|CrbpII|Rbp-2	retinol binding protein 2, cellular	protein-coding
upeaks-25643	chr2	112826564	112826805	+	0	NA	exon (NM_001319156, exon 37 of 104)	exon (NM_001319156, exon 37 of 104)	203647	NM_177652	20192	Mm.436657	NM_177652	ENSMUSG00000057378	Ryr3	AI851294|C230090H21|RYR-3	ryanodine receptor 3	protein-coding
upeaks-21436	chr18	48693242	48693482	+	0	NA	Intergenic	Intergenic	648027	NM_001025388	433182	Mm.70666	NM_001025388	ENSMUSG00000059040	Eno1b	EG433182|Eno1|Gm5506	enolase 1B, retrotransposed	protein-coding
upeaks-16511	chr15	83411608	83411993	+	0	NA	intron (NM_001159509, intron 1 of 10)	intron (NM_001159509, intron 1 of 10)	21050	NM_001159510	23970	Mm.23978	NM_011862	ENSMUSG00000016664	Pacsin2	AI197433	protein kinase C and casein kinase substrate in neurons 2	protein-coding
upeaks-45832	chr9	70977493	70977692	+	0	NA	Intergenic	Intergenic	-25371	NM_001324473	15450	Mm.390187	NM_008280	ENSMUSG00000032207	Lipc	AI256194|HL|Hpl	lipase, hepatic	protein-coding
upeaks-12815	chr13	96890095	96890294	+	0	NA	Intergenic	Lx|LINE|L1	-34495	NM_001166065	218476	Mm.483490	NM_001166065	ENSMUSG00000091387	Gcnt4	C2gnt3|Gm279|Gm73	glucosaminyl (N-acetyl) transferase 4, core 2 (beta-1,6-N-acetylglucosaminyltransferase)	protein-coding
upeaks-43583	chr8	102699355	102699572	+	0	NA	intron (NM_009866, intron 2 of 12)	MLT1C|LTR|ERVL-MaLR	85648	NM_009866	12552	Mm.1571	NM_009866	ENSMUSG00000031673	Cdh11	Cad11|OSF-4	cadherin 11	protein-coding
upeaks-11892	chr13	45483215	45483530	+	0	NA	Intergenic	Intergenic	-24072	NM_025508	66355	Mm.290802	NM_025508	ENSMUSG00000000253	Gmpr	2310004P21Rik|AV028449|GMPR 1	guanosine monophosphate reductase	protein-coding
upeaks-46333	chr9	97826066	97826534	+	0	NA	intron (NM_022319, intron 1 of 17)	intron (NM_022319, intron 1 of 17)	-177120	NR_110443	66737	Mm.445908	NR_110443	ENSMUSG00000090255	4921534H16Rik	-	RIKEN cDNA 4921534H16 gene	ncRNA
upeaks-5209	chr10	105466040	105466403	+	0	NA	intron (NM_177368, intron 1 of 11)	intron (NM_177368, intron 1 of 11)	108258	NM_177368	278279	Mm.25225	NM_177368	ENSMUSG00000036019	Tmtc2	8430438D04Rik|D330034A10Rik	transmembrane and tetratricopeptide repeat containing 2	protein-coding
upeaks-27784	chr3	28740444	28740662	+	0	NA	Intergenic	Intergenic	-40758	NM_177586	208691	Mm.193670	NM_177586	ENSMUSG00000050192	Eif5a2	9630038B20|eIF5AII	eukaryotic translation initiation factor 5A2	protein-coding
upeaks-20520	chr17	84274353	84274575	+	0	NA	intron (NM_183021, intron 29 of 37)	intron (NM_183021, intron 29 of 37)	-86517	NM_001001806	12193	Mm.259321	NM_001001806	ENSMUSG00000045817	Zfp36l2	Brf2|ERF2|Tis11d	zinc finger protein 36, C3H type-like 2	protein-coding
upeaks-33968	chr5	43481914	43482117	+	0	NA	Intergenic	Intergenic	-33554	NM_001135172	109323	Mm.275553	NM_175425	ENSMUSG00000061535	C1qtnf7	5530401N20Rik|8430425G24Rik|Ctrp7	C1q and tumor necrosis factor related protein 7	protein-coding
upeaks-29774	chr3	138131222	138131519	+	0	NA	promoter-TSS (NM_008642)	promoter-TSS (NM_008642)	7	NM_008642	17777	Mm.2941	NM_008642	ENSMUSG00000028158	Mttp	1810043K16Rik|MTP	microsomal triglyceride transfer protein	protein-coding
upeaks-37715	chr6	93410616	93411088	+	0	NA	Intergenic	Intergenic	470270	NR_015530	330385	Mm.483472	NR_015530	ENSMUSG00000097462	9530026P05Rik	B430306B02	RIKEN cDNA 9530026P05 gene	ncRNA
upeaks-38517	chr6	134614717	134614985	+	0	NA	intron (NM_026345, intron 3 of 3)	intron (NM_026345, intron 3 of 3)	17637	NM_026345	67729	Mm.57648	NM_026345	ENSMUSG00000032718	Mansc1	9130403P13Rik	MANSC domain containing 1	protein-coding
upeaks-10252	chr12	80764160	80764393	+	0	NA	Intergenic	LTR40a|LTR|ERVL	-3561	NM_001008423	380768	Mm.29367	NM_001008423	ENSMUSG00000062961	Ccdc177	Gm1568	coiled-coil domain containing 177	protein-coding
upeaks-1736	chr1	130373521	130374130	+	0	NA	Intergenic	Intergenic	49218	NM_001317361	13137	Mm.436759	NM_007827	ENSMUSG00000026401	Cd55b	AI323748|Daf|Daf-TM|Daf2|TM-DAF	CD55 molecule, decay accelerating factor for complement B	protein-coding
upeaks-43491	chr8	94408644	94408920	+	0	NA	Intergenic	Intergenic	22282	NM_022331	64209	Mm.29151	NM_022331	ENSMUSG00000031770	Herpud1	Herp|Mifl|SUP	homocysteine-inducible, endoplasmic reticulum stress-inducible, ubiquitin-like domain member 1	protein-coding
upeaks-1798	chr1	132164808	132165067	+	0	NA	Intergenic	Intergenic	-25252	NM_008795	18557	Mm.28130	NM_008795	ENSMUSG00000026437	Cdk18	AA682070|Ctk18|Pctk3	cyclin-dependent kinase 18	protein-coding
upeaks-11922	chr13	46696848	46697207	+	0	NA	intron (NM_175749, intron 14 of 21)	RMER20B|LTR|ERVK	27505	NM_001033192	97863	Mm.275934	NM_001033192	ENSMUSG00000069237	Fam8a1	C78339	family with sequence similarity 8, member A1	protein-coding
upeaks-5898	chr11	3983979	3984271	+	0	NA	intron (NM_001177703, intron 1 of 2)	intron (NM_001177703, intron 1 of 2)	489	NM_016922	53897	Mm.103414	NM_016922	ENSMUSG00000049721	Gal3st1	Cst|Gcst	galactose-3-O-sulfotransferase 1	protein-coding
upeaks-5421	chr10	116965358	116965674	+	0	NA	promoter-TSS (NR_027846)	promoter-TSS (NR_027846)	-758	NR_027846	103175	Mm.27138	NR_027846	ENSMUSG00000031294	D630029K05Rik	AI314111|AI875589	RIKEN cDNA D630029K05 gene	ncRNA
upeaks-44061	chr8	119885562	119885933	+	0	NA	Intergenic	Intergenic	23442	NM_146219	234796	Mm.86446	NM_146219	ENSMUSG00000031828	Klhl36	-	kelch-like 36	protein-coding
upeaks-25519	chr2	104743946	104744145	+	0	NA	Intergenic	RMER17C|LTR|ERVK	-1244	NM_144804	211896	Mm.288805	NM_144804	ENSMUSG00000027173	Depdc7	AV216087	DEP domain containing 7	protein-coding
upeaks-15838	chr15	55122948	55123227	+	0	NA	intron (NM_145470, intron 1 of 8)	intron (NM_145470, intron 1 of 8)	-9505	NR_045093	100503794	Mm.360519	NR_045093	ENSMUSG00000053749	Gm9920	ENSMUSG00000053749	predicted gene 9920	ncRNA
upeaks-12685	chr13	90490854	90491357	+	0	NA	Intergenic	Intergenic	401438	NM_025335	66074	Mm.241387	NM_025335	ENSMUSG00000012422	Tmem167	0610041E09Rik|5730424F14Rik|AU041184|AW537806|ENSMUSG00000060669|Gm10085|Tmem167a	transmembrane protein 167	protein-coding
upeaks-26326	chr2	141289345	141289892	+	0	NA	intron (NM_001013802, intron 5 of 18)	intron (NM_001013802, intron 5 of 18)	-618142	NM_001172160	71436	Mm.426781	NM_178382	ENSMUSG00000051379	Flrt3	5530600M07Rik|C430047I10Rik|mKIAA1469	fibronectin leucine rich transmembrane protein 3	protein-coding
upeaks-8412	chr11	102630720	102631097	+	0	NA	Intergenic	Intergenic	-6492	NR_033474	77132	Mm.194729	NR_033474		2810433D01Rik	-	RIKEN cDNA 2810433D01 gene	ncRNA
upeaks-33904	chr5	37832392	37832608	+	0	NA	Intergenic	Intergenic	-7915	NM_010835	17701	Mm.256509	NM_010835	ENSMUSG00000048450	Msx1	AA675338|AI324650|Hox-7|Hox7|Hox7.1|msh	msh homeobox 1	protein-coding
upeaks-34436	chr5	77148082	77148303	+	0	NA	Intergenic	ORR1E|LTR|ERVL-MaLR	-33069	NM_175606	74318	Mm.181852	NM_175606	ENSMUSG00000059325	Hopx	1110018K11Rik|1200015P04Rik|2300002F06Rik|AI848177|AW490897|Cameo|Hdop|Hod|Hop|Ob1|Obl|Toto	HOP homeobox	protein-coding
upeaks-22471	chr19	8770872	8771325	+	0	NA	TTS (NM_001276704)	TTS (NM_001276704)	102	NM_025791	66836	Mm.440071	NM_025791	ENSMUSG00000010097	Tmem223	0610006I08Rik	transmembrane protein 223	protein-coding
upeaks-23665	chr2	6178923	6179352	+	0	NA	Intergenic	Intergenic	-14114	NR_040333	320132	Mm.445891	NR_040333	ENSMUSG00000087125	A230108P19Rik	-	RIKEN cDNA A230108P19 gene	ncRNA
upeaks-7048	chr11	62128627	62128826	+	0	NA	intron (NM_001029936, intron 3 of 12)	intron (NM_001029936, intron 3 of 12)	51702	NM_001029936	432572	Mm.438022	NM_001029936	ENSMUSG00000042331	Specc1	2810012G08Rik|B230396K10Rik|Cytsb	sperm antigen with calponin homology and coiled-coil domains 1	protein-coding
upeaks-42278	chr8	25546860	25547180	+	0	NA	intron (NM_001079909, intron 2 of 16)	intron (NM_001079909, intron 2 of 16)	9063	NR_110510	102633315	Mm.437828	NR_110510	ENSMUSG00000086134	Gm16159	OTTMUSG00000031030	predicted gene 16159	ncRNA
upeaks-35404	chr5	123854601	123854821	+	0	NA	Intergenic	Intergenic	10805	NM_030701	80885	Mm.440567	NM_030701	ENSMUSG00000045502	Hcar2	Gpr109a|Gpr109b|HM74|Niacr1|PUMA-G|Pumag|mHM74b	hydroxycarboxylic acid receptor 2	protein-coding
upeaks-26179	chr2	134028031	134028375	+	0	NA	Intergenic	Intergenic	463495	NR_037273	100526500		NR_037273	ENSMUSG00000093338	Mir3090	mmu-mir-3090	microRNA 3090	ncRNA
upeaks-29752	chr3	137307172	137307726	+	0	NA	Intergenic	RLTR30D2_MM|LTR|ERV1	-33629	NM_016885	59308	Mm.27343	NM_016885	ENSMUSG00000054690	Emcn	0610012K22Rik|AI315669|Muc14	endomucin	protein-coding
upeaks-32499	chr4	134327142	134327513	+	0	NA	intron (NM_001039048, intron 7 of 8)	intron (NM_001039048, intron 7 of 8)	12207	NM_001039048	433766	Mm.331961	NM_001039048	ENSMUSG00000028834	Trim63	MuRF1|RF1|Rnf28	tripartite motif-containing 63	protein-coding
upeaks-39202	chr7	19031658	19031930	+	0	NA	intron (NM_026605, intron 5 of 26)	intron (NM_026605, intron 5 of 26)	7417	NM_026605	68188	Mm.130902	NM_026605	ENSMUSG00000023118	Sympk	1500016F02Rik|4632415H16Rik|AA125406|AI449890|SPK|SYM	symplekin	protein-coding
upeaks-24818	chr2	62370079	62370384	+	0	NA	intron (NM_001159543, intron 10 of 24)	intron (NM_001159543, intron 10 of 24)	42000	NM_010074	13482	Mm.1151	NM_010074	ENSMUSG00000035000	Dpp4	Cd26|Dpp-4|THAM	dipeptidylpeptidase 4	protein-coding
upeaks-2693	chr1	174592492	174592691	+	0	NA	intron (NM_019445, intron 3 of 17)	intron (NM_019445, intron 3 of 17)	90766	NM_019445	54418	Mm.330620	NM_019445	ENSMUSG00000028354	Fmn2	AU024104	formin 2	protein-coding
upeaks-44975	chr9	37537797	37538062	+	0	NA	non-coding (NR_136939, exon 7 of 7)	non-coding (NR_136939, exon 7 of 7)	-1326	NM_020518	57276	Mm.27478	NM_020518	ENSMUSG00000001943	Vsig2	1190004B15Rik|2210413P10Rik|AU040484|CTX|Ctm	V-set and immunoglobulin domain containing 2	protein-coding
upeaks-20081	chr17	63755143	63755366	+	0	NA	Intergenic	PB1|SINE|Alu	-108727	NM_001037997	14158	Mm.23039	NM_008000	ENSMUSG00000000127	Fer	AV082135|C330004K01Rik|Fert|Fert2	fer (fms/fps related) protein kinase	protein-coding
upeaks-47947	chrX	150985198	150985397	+	0	NA	3' UTR (NM_198110, exon 16 of 16)	3' UTR (NM_198110, exon 16 of 16)	31996	NM_001168600	237107	Mm.45987	NM_198110	ENSMUSG00000025266	Gnl3l	BC020354	guanine nucleotide binding protein-like 3 (nucleolar)-like	protein-coding
upeaks-9480	chr12	25533946	25534315	+	0	NA	Intergenic	Intergenic	404956	NR_045844	432641	Mm.112955	NR_045844		Gm17746	-	predicted gene, 17746	ncRNA
upeaks-36948	chr6	48768529	48768776	+	0	NA	intron (NM_031247, intron 2 of 4)	intron (NM_031247, intron 2 of 4)	2199	NM_031247	83408	Mm.333050	NM_031247	ENSMUSG00000039264	Gimap3	2010110D23Rik|Gimap5|Ian4	GTPase, IMAP family member 3	protein-coding
upeaks-44038	chr8	119465010	119465243	+	0	NA	intron (NM_054095, intron 7 of 12)	intron (NM_054095, intron 7 of 12)	18407	NM_054095	117148	Mm.356184	NM_054095	ENSMUSG00000031837	Necab2	Efcbp2	N-terminal EF-hand calcium binding protein 2	protein-coding
upeaks-35737	chr5	136608841	136609259	+	0	NA	Intergenic	Intergenic	-41560	NM_009986	13047	Mm.320317	NM_009986	ENSMUSG00000029705	Cux1	CDP|Cutl1|Cux|Cux-1	cut-like homeobox 1	protein-coding
upeaks-36531	chr6	24664573	24665564	+	0	NA	promoter-TSS (NM_028459)	promoter-TSS (NM_028459)	-73	NM_028459	73178	Mm.1574	NM_028459	ENSMUSG00000029684	Wasl	2900021I12Rik|3110031I02Rik|N-WASP	Wiskott-Aldrich syndrome-like (human)	protein-coding
upeaks-8687	chr11	111078718	111079131	+	0	NA	Intergenic	MTD|LTR|ERVL-MaLR	12760	NM_008425	16518	Mm.4951	NM_008425	ENSMUSG00000041695	Kcnj2	IRK1|Kcnf1|Kir2.1	potassium inwardly-rectifying channel, subfamily J, member 2	protein-coding
upeaks-35540	chr5	129771063	129771566	+	0	NA	intron (NM_133900, intron 4 of 7)	intron (NM_133900, intron 4 of 7)	15939	NM_133900	100678	Mm.271784	NM_133900	ENSMUSG00000029446	Psph	AI480570|PSP|PSPase	phosphoserine phosphatase	protein-coding
upeaks-3058	chr1	189576389	189576728	+	0	NA	Intergenic	Intergenic	111528	NM_001081363	108000	Mm.129746	NM_001081363	ENSMUSG00000026605	Cenpf	6530404A22Rik|AI325968|CENF|Lek1|PRO1779|mitosin	centromere protein F	protein-coding
upeaks-21354	chr18	43737118	43737674	+	0	NA	promoter-TSS (NM_009258)	promoter-TSS (NM_009258)	-159	NM_009258	20730	Mm.272	NM_009258	ENSMUSG00000024503	Spink1	Spink3|p12	serine peptidase inhibitor, Kazal type 1	protein-coding
upeaks-4536	chr10	77587145	77587414	+	0	NA	exon (NM_145925, exon 2 of 6)	exon (NM_145925, exon 2 of 6)	5512	NM_145925	108705	Mm.28853	NM_145925	ENSMUSG00000009291	Pttg1ip	1810010L20Rik|AI314311|AU018448|C79540	pituitary tumor-transforming 1 interacting protein	protein-coding
upeaks-8079	chr11	96407572	96408060	+	0	NA	Intergenic	Intergenic	42058	NM_008266	15407	Mm.890	NM_008266	ENSMUSG00000018973	Hoxb1	Hox-2.9	homeobox B1	protein-coding
upeaks-3755	chr10	32984796	32985236	+	0	NA	Intergenic	RLTR1E_MM|LTR|ERV1	-95101	NM_001025286	432450	Mm.49665	NM_001013411	ENSMUSG00000069670	Nkain2	6330571D19Rik|AW455467|Tcba1	Na+/K+ transporting ATPase interacting 2	protein-coding
upeaks-47836	chrX	136938085	136938384	+	0	NA	Intergenic	Intergenic	10909	NM_027067	69389	Mm.302721	NM_027067	ENSMUSG00000048155	H2bfm	1700014N06Rik|H2bfw|H2bl2	H2B histone family, member M	protein-coding
upeaks-37929	chr6	108468383	108468674	+	0	NA	intron (NM_010585, intron 44 of 61)	intron (NM_010585, intron 44 of 61)	-21215	NR_106121	102465766		NR_106121	ENSMUSG00000105697	Mir7661	mmu-mir-7661	microRNA 7661	ncRNA
upeaks-43750	chr8	107449249	107449453	+	0	NA	intron (NM_025830, intron 1 of 23)	intron (NM_025830, intron 1 of 23)	12953	NM_025830	66894	Mm.390058	NM_025830	ENSMUSG00000031930	Wwp2	1300010O06Rik|AA690238|AIP2|AW554328	WW domain containing E3 ubiquitin protein ligase 2	protein-coding
upeaks-20909	chr18	15063504	15063760	+	0	NA	promoter-TSS (NM_001142731)	promoter-TSS (NM_001142731)	-50	NM_001142731	106931	Mm.329299	NM_134112	ENSMUSG00000036225	Kctd1	4933402K10Rik|AI661543|AW553000	potassium channel tetramerisation domain containing 1	protein-coding
upeaks-44963	chr9	37359605	37360140	+	0	NA	Intergenic	Intergenic	-7734	NM_175189	72927	Mm.266133	NM_175189	ENSMUSG00000046240	Hepacam	2900042E01Rik|Glialcam|Hepn1	hepatocyte cell adhesion molecule	protein-coding
upeaks-23506	chr19	58064158	58064395	+	0	NA	intron (NM_181415, intron 28 of 28)	intron (NM_181415, intron 28 of 28)	13109	NR_049196	100885835		NR_049196	ENSMUSG00000093757	Mir5623	Gm26068|mir-5623|mmu-mir-5623	microRNA 5623	ncRNA
upeaks-34373	chr5	74769245	74769444	+	0	NA	Intergenic	Intergenic	-66441	NM_001159577	16924	Mm.440403	NM_010727	ENSMUSG00000029228	Lnx1	Lnx	ligand of numb-protein X 1	protein-coding
upeaks-45926	chr9	75541528	75541894	+	0	NA	intron (NM_016963, intron 1 of 9)	intron (NM_016963, intron 1 of 9)	17946	NM_016963	50875	Mm.38445	NM_016963	ENSMUSG00000058587	Tmod3	U-Tmod|UTMOD	tropomodulin 3	protein-coding
upeaks-42198	chr8	22443028	22443292	+	0	NA	Intergenic	Intergenic	31820	NM_020560	57312	Mm.289402	NM_020560	ENSMUSG00000031533	Mrps31	1500002D03Rik|AA960481|Imogen38|Imogen44	mitochondrial ribosomal protein S31	protein-coding
upeaks-38238	chr6	122663621	122664145	+	0	NA	Intergenic	Intergenic	37459	NM_139218	73708	Mm.27982	NM_139218	ENSMUSG00000046323	Dppa3	2410075G02Rik|PCG7|PGC7|Stella	developmental pluripotency-associated 3	protein-coding
upeaks-7097	chr11	63791107	63791351	+	0	NA	Intergenic	Intergenic	131055	NM_018805	54710	Mm.274426	NM_018805	ENSMUSG00000070407	Hs3st3b1	3-OST-3B|3OST3B1|3Ost3b|AU041882|AW536289|Hs3st3b|m3-OST-3B	heparan sulfate (glucosamine) 3-O-sulfotransferase 3B1	protein-coding
upeaks-23424	chr19	55137090	55137346	+	0	NA	Intergenic	Intergenic	-37771	NM_008149	14732	Mm.210196	NM_008149	ENSMUSG00000024978	Gpam	GPAT|GPAT1	glycerol-3-phosphate acyltransferase, mitochondrial	protein-coding
upeaks-4148	chr10	59540744	59540988	+	0	NA	intron (NM_001033259, intron 1 of 7)	intron (NM_001033259, intron 1 of 7)	75826	NM_001033259	215999	Mm.296470	NM_001033259	ENSMUSG00000009647	Mcu	2010012O16Rik|AV064928|C10orf42|Ccdc109a|D130073L02Rik|Gm64	mitochondrial calcium uniporter	protein-coding
upeaks-35694	chr5	135557104	135557483	+	0	NA	Intergenic	Intergenic	6276	NM_001013412	541307	Mm.376459	NM_001013412	ENSMUSG00000070464	Ccl26	Ccl26l	chemokine (C-C motif) ligand 26	protein-coding
upeaks-47447	chrX	69415041	69415395	+	0	NA	intron (NM_008032, intron 1 of 19)	MER77|LTR|ERVL	54887	NM_008032	14266	Mm.466576	NM_008032	ENSMUSG00000031189	Aff2	FMR2P|Fmr2|Ox19|Oxh	AF4/FMR2 family, member 2	protein-coding
upeaks-33127	chr4	151414965	151415196	+	0	NA	intron (NM_001081557, intron 5 of 23)	intron (NM_001081557, intron 5 of 23)	325510	NM_001308446	105704528	Mm.415128	NM_001308446	ENSMUSG00000078491	Gm13090	OTTMUSG00000010356	predicted gene 13090	protein-coding
upeaks-15932	chr15	59614381	59614584	+	0	NA	Intergenic	Intergenic	-34172	NM_144549	211770	Mm.40298	NM_144549	ENSMUSG00000032501	Trib1	A530090O15Rik|TRB-1|Trb1	tribbles pseudokinase 1	protein-coding
upeaks-13966	chr14	45430083	45430474	+	0	NA	Intergenic	Intergenic	-41482	NM_019425	54342	Mm.312945	NM_019425	ENSMUSG00000037722	Gnpnat1	AU017428|AU040593|EMeg32|Gpnat1|Gsnpat	glucosamine-phosphate N-acetyltransferase 1	protein-coding
upeaks-38079	chr6	116635239	116635895	+	0	NA	3' UTR (NM_178045, exon 11 of 11)	3' UTR (NM_178045, exon 11 of 11)	-6568	NM_026057	67255	Mm.18810	NM_026057	ENSMUSG00000059878	Zfp422	2900028O21Rik|AU041373|KOX15|Krox-25-2|Krox-26|Krox25|Krox26|Znf22	zinc finger protein 422	protein-coding
upeaks-45959	chr9	77385218	77385705	+	0	NA	intron (NR_040378, intron 2 of 3)	intron (NR_040378, intron 2 of 3)	13955	NR_040378	70487	Mm.58958	NR_040378	ENSMUSG00000099170	5730403I07Rik	-	RIKEN cDNA 5730403I07 gene	ncRNA
upeaks-16641	chr15	88730715	88731005	+	0	NA	intron (NM_001033274, intron 1 of 12)	intron (NM_001033274, intron 1 of 12)	3359	NM_001033274	223770	Mm.254438	NM_001033274	ENSMUSG00000022387	Brd1	1110059H06Rik|AI316859|mKIAA4191	bromodomain containing 1	protein-coding
upeaks-34116	chr5	53490930	53491129	+	0	NA	Intergenic	Intergenic	-64750	NM_001080928	19664	Mm.209292	NM_009035	ENSMUSG00000039191	Rbpj	AI843960|CBF1|Igkjrb|Igkrsbp|RBP-J|RBP-J kappa|RBP-Jkappa|RBPjk|Rbpsuh	recombination signal binding protein for immunoglobulin kappa J region	protein-coding
upeaks-29167	chr3	107230636	107230938	+	0	NA	intron (NM_001256174, intron 1 of 2)	intron (NM_001256174, intron 1 of 2)	173	NM_001256174	319929	Mm.30453	NM_001256174	ENSMUSG00000094613	A630076J17Rik	-	RIKEN cDNA A630076J17 gene	protein-coding
upeaks-41462	chr7	130720099	130720344	+	0	NA	intron (NM_001347637, intron 2 of 14)	intron (NM_001347637, intron 2 of 14)	27665	NM_001347637	57752	Mm.86322	NM_021314	ENSMUSG00000030852	Tacc2	mKIAA4180	transforming, acidic coiled-coil containing protein 2	protein-coding
upeaks-912	chr1	72020421	72020826	+	0	NA	Intergenic	Intergenic	-15428	NR_040454	71134	Mm.370574	NR_040454	ENSMUSG00000101848	4933417E11Rik	-	RIKEN cDNA 4933417E11 gene	ncRNA
upeaks-47089	chr9	123511205	123511426	+	0	NA	intron (NM_013860, intron 4 of 7)	intron (NM_013860, intron 4 of 7)	-18567	NM_030692	83493	Mm.273671	NM_030692	ENSMUSG00000025240	Sacm1l	SAC1|Sac1p|mKIAA0851	SAC1 suppressor of actin mutations 1-like (yeast)	protein-coding
upeaks-40467	chr7	88261884	88262281	+	0	NA	Intergenic	Intergenic	-16003	NM_009982	13032	Mm.89295	NM_009982	ENSMUSG00000030560	Ctsc	AI047818|CatC|DPP1|DPPI	cathepsin C	protein-coding
upeaks-12649	chr13	86345355	86345591	+	0	NA	Intergenic	RLTR9E|LTR|ERVK	-298678	NM_007749	12867	Mm.378898	NM_007749	ENSMUSG00000017778	Cox7c	COXVIIc|Cox7c1	cytochrome c oxidase subunit VIIc	protein-coding
upeaks-5467	chr10	117932531	117932753	+	0	NA	intron (NR_045342, intron 2 of 3)	RLTR28|LTR|ERVL	7183	NR_045342	71067	Mm.410793	NR_045342		4933411E08Rik	-	RIKEN cDNA 4933411E08 gene	ncRNA
upeaks-30627	chr4	40434476	40434704	+	0	NA	Intergenic	PB1|SINE|Alu	-37590	NM_177175	320500	Mm.156365	NM_177175	ENSMUSG00000046593	Tmem215	A930001M12Rik	transmembrane protein 215	protein-coding
upeaks-7735	chr11	84813776	84813975	+	0	NA	3' UTR (NM_145433, exon 5 of 5)	3' UTR (NM_145433, exon 5 of 5)	5640	NM_145433	217038	Mm.280825	NM_145433	ENSMUSG00000018405	Mrm1	A530065E19Rik|ENSMUSG00000054212	mitochondrial rRNA methyltransferase 1	protein-coding
upeaks-3294	chr10	5208001	5208659	+	0	NA	intron (NM_001347732, intron 86 of 145)	intron (NM_001347732, intron 86 of 145)	-13623	NM_001079686	64009	Mm.331626	NM_022027	ENSMUSG00000096054	Syne1	8B|A330049M09Rik|BE692247|C130039F11Rik|CPG2|Myne1|mKIAA1756|myne-1	spectrin repeat containing, nuclear envelope 1	protein-coding
upeaks-30037	chr3	149317164	149317371	+	0	NA	Intergenic	PB1|SINE|Alu	42530	NR_040591	381482	Mm.393866	NR_040591		Gm1653	-	predicted gene 1653	ncRNA
upeaks-29722	chr3	135756799	135757141	+	0	NA	Intergenic	Intergenic	-65423	NM_008689	18033	Mm.256765	NM_008689	ENSMUSG00000028163	Nfkb1	NF-KB1|NF-kappaB|NF-kappaB1|p105|p50|p50/p105	nuclear factor of kappa light polypeptide gene enhancer in B cells 1, p105	protein-coding
upeaks-7636	chr11	80159133	80159375	+	0	NA	intron (NM_172133, intron 3 of 10)	intron (NM_172133, intron 3 of 10)	5092	NM_172133	216991	Mm.341520	NM_172133	ENSMUSG00000020709	Adap2	Centa2	ArfGAP with dual PH domains 2	protein-coding
upeaks-16321	chr15	78844878	78845126	+	0	NA	intron (NM_027219, intron 1 of 2)	intron (NM_027219, intron 1 of 2)	2355	NM_027219	104445	Mm.307488	NM_027219	ENSMUSG00000049521	Cdc42ep1	1810058K22Rik|AA980734|Borg5|CEP1|MSE55	CDC42 effector protein (Rho GTPase binding) 1	protein-coding
upeaks-12729	chr13	93022188	93022609	+	0	NA	Intergenic	Intergenic	-50906	NR_036451	100502942	Mm.441946	NM_177623		Gm4814	C920025J10|EG218444	predicted gene 4814	ncRNA
upeaks-12374	chr13	67495772	67495976	+	0	NA	intron (NM_001007575, intron 1 of 3)	RMER6A|LTR|ERVK	4648	NM_001007575	238693	Mm.478914	NM_001007575	ENSMUSG00000071291	Zfp58	A530094I17Rik|Mfg-1|Mfg1|Rslcan5|Zfp817	zinc finger protein 58	protein-coding
upeaks-11789	chr13	40989676	40989912	+	0	NA	Intergenic	PB1D10|SINE|Alu	-11216	NM_026550	68083	Mm.24789	NM_026550	ENSMUSG00000038683	Pak1ip1	5830431I15Rik|5930415H02Rik|AA419825|AI314040|AW556169|Gdpd1|PIP1	PAK1 interacting protein 1	protein-coding
upeaks-15370	chr15	10925628	10925852	+	0	NA	Intergenic	RLTR17C_Mm|LTR|ERVK	-26592	NM_030888	81799	Mm.280158	NM_030888	ENSMUSG00000058914	C1qtnf3	2310005P21Rik|CORS-26|CORS26|CTRP3|Corcs|Cors	C1q and tumor necrosis factor related protein 3	protein-coding
upeaks-18033	chr16	46412288	46412617	+	0	NA	intron (NM_021496, intron 7 of 8)	intron (NM_021496, intron 7 of 8)	84515	NM_021496	58998	Mm.40477	NM_021495	ENSMUSG00000022656	Nectin3	2610301B19Rik|3000002N23Rik|4921513D19Rik|AA407785|AU016832|AW538082|CD113|Pvrl3	nectin cell adhesion molecule 3	protein-coding
upeaks-36678	chr6	33731936	33732141	+	0	NA	intron (NM_009148, intron 10 of 17)	intron (NM_009148, intron 10 of 17)	-297410	NM_028886	74354	Mm.127952	NM_028886	ENSMUSG00000056215	Lrguk	4921528H16Rik	leucine-rich repeats and guanylate kinase domain containing	protein-coding
upeaks-34450	chr5	78353698	78353940	+	0	NA	Intergenic	Lx4A|LINE|L1	888331	NR_131050	69370	Mm.426881	NR_131050	ENSMUSG00000107232	1700017L05Rik	-	RIKEN cDNA 1700017L05 gene	ncRNA
upeaks-43117	chr8	79374882	79375225	+	0	NA	intron (NM_008539, intron 1 of 6)	MIRb|SINE|MIR	24415	NM_008539	17125	Mm.223717	NM_008539	ENSMUSG00000031681	Smad1	AI528653|Madh1|Madr1|Mlp1|MusMLP	SMAD family member 1	protein-coding
upeaks-29204	chr3	108026117	108026344	+	0	NA	Intergenic	MTD|LTR|ERVL-MaLR	-8257	NM_010358	14862	Mm.37199	NM_010358	ENSMUSG00000058135	Gstm1	Gstb-1|Gstb1	glutathione S-transferase, mu 1	protein-coding
upeaks-5293	chr10	110713569	110714101	+	0	NA	Intergenic	Intergenic	-31630	NM_178609	52679	Mm.11747	NM_178609	ENSMUSG00000020185	E2f7	A630014C11Rik|D10Ertd739e	E2F transcription factor 7	protein-coding
upeaks-45039	chr9	41170135	41170348	+	0	NA	Intergenic	Intergenic	-12747	NM_176860	72828	Mm.133615	NM_176860	ENSMUSG00000032020	Ubash3b	2810457I06Rik|BB125008|TULA-2|p70	ubiquitin associated and SH3 domain containing, B	protein-coding
upeaks-44457	chr9	6335203	6335502	+	0	NA	intron (NM_027924, intron 4 of 6)	intron (NM_027924, intron 4 of 6)	-68805	NM_027942	71829	Mm.141452	NM_027942	ENSMUSG00000047619	Ddi1	1700011N24Rik	DNA-damage inducible 1	protein-coding
upeaks-14151	chr14	54582580	54582924	+	0	NA	TTS (NM_028890)	TTS (NM_028890)	-5091	NM_010590	16475	Mm.100253	NM_010590	ENSMUSG00000022178	Ajuba	Jub	ajuba LIM protein	protein-coding
upeaks-15970	chr15	62139286	62139643	+	0	NA	intron (NR_132746, intron 2 of 6)	intron (NR_132746, intron 2 of 6)	79987	NR_003523	67552	Mm.484027	NM_026230		H2afy3	4933432H23Rik	H2A histone family, member Y3	pseudo
upeaks-35916	chr5	140816847	140817135	+	0	NA	intron (NM_010302, intron 1 of 3)	intron (NM_010302, intron 1 of 3)	13440	NM_010302	14673	Mm.370185	NM_010302	ENSMUSG00000000149	Gna12	AI414047|AI504261|Galpha12	guanine nucleotide binding protein, alpha 12	protein-coding
upeaks-5941	chr11	5139452	5139744	+	0	NA	intron (NM_080595, intron 3 of 14)	intron (NM_080595, intron 3 of 14)	12624	NM_080595	140703	Mm.840	NM_080595	ENSMUSG00000034164	Emid1	AW122071|CO-5|Emu1	EMI domain containing 1	protein-coding
upeaks-16867	chr15	97927070	97927294	+	0	NA	Intergenic	Intergenic	-18886	NM_009504	22337	Mm.245084	NM_009504	ENSMUSG00000022479	Vdr	Nr1i1	vitamin D receptor	protein-coding
upeaks-10143	chr12	77131371	77131617	+	0	NA	Intergenic	MTD|LTR|ERVL-MaLR	-106610	NM_001252614	53618	Mm.35628	NM_016893	ENSMUSG00000021065	Fut8	-	fucosyltransferase 8	protein-coding
upeaks-10693	chr12	103738129	103738686	+	0	NA	promoter-TSS (NM_009244)	promoter-TSS (NM_009244)	-218	NM_009244	20701	Mm.439692	NM_009244	ENSMUSG00000071178	Serpina1b	D12Ucla2|Dom2|PI2|Spi1-2	serine (or cysteine) preptidase inhibitor, clade A, member 1B	protein-coding
upeaks-38049	chr6	115700854	115701129	+	0	NA	Intergenic	Intergenic	-24356	NM_029780	110157	Mm.184163	NM_029780	ENSMUSG00000000441	Raf1	6430402F14Rik|AA990557|BB129353|Craf1|D830050J10Rik|Raf-1|c-Raf|v-Raf	v-raf-leukemia viral oncogene 1	protein-coding
upeaks-914	chr1	72036710	72036945	+	0	NA	Intergenic	Intergenic	-31632	NR_040454	71134	Mm.370574	NR_040454	ENSMUSG00000101848	4933417E11Rik	-	RIKEN cDNA 4933417E11 gene	ncRNA
upeaks-2364	chr1	162254954	162255270	+	0	NA	intron (NM_001038619, intron 13 of 20)	intron (NM_001038619, intron 13 of 20)	31744	NR_029796	387210		NR_029796	ENSMUSG00000065516	Mir214	Mirn214|mir-214|mmu-mir-214	microRNA 214	ncRNA
upeaks-46499	chr9	104901169	104901368	+	0	NA	intron (NM_028719, intron 4 of 15)	intron (NM_028719, intron 4 of 15)	-152000	NM_053159	94062	Mm.29746	NM_053159	ENSMUSG00000032563	Mrpl3	2010320L16Rik|5930422H18Rik|AA407889	mitochondrial ribosomal protein L3	protein-coding
upeaks-29426	chr3	122339214	122339413	+	0	NA	Intergenic	B1F|SINE|Alu	-45610	NR_030439	791077		NR_030439	ENSMUSG00000076456	Mir760	Mirn760|mir-760|mmu-mir-760	microRNA 760	ncRNA
upeaks-3419	chr10	13280467	13280673	+	0	NA	intron (NM_001033257, intron 2 of 11)	L1MB8|LINE|L1	43590	NM_001033257	215789	Mm.283359	NM_001033257	ENSMUSG00000062866	Phactr2	AV158170|BC012871	phosphatase and actin regulator 2	protein-coding
upeaks-34017	chr5	46073177	46073515	+	0	NA	Intergenic	Intergenic	-140937	NR_110478	78106	Mm.243807	NR_110478	ENSMUSG00000106602	4930405L22Rik	-	RIKEN cDNA 4930405L22 gene	ncRNA
upeaks-47611	chrX	99019405	99019612	+	0	NA	Intergenic	Intergenic	-23073	NM_199018	236920	Mm.236928	NM_199018	ENSMUSG00000031216	Stard8	Dlc3|mKIAA0189	START domain containing 8	protein-coding
upeaks-17648	chr16	29714178	29714461	+	0	NA	Intergenic	RLTR14_RN|LTR|ERV1	134985	NM_133752	74143	Mm.274285	NM_133752	ENSMUSG00000038084	Opa1	1200011N24Rik|AI225888|AI847218|lilr3|mKIAA0567	OPA1, mitochondrial dynamin like GTPase	protein-coding
upeaks-6014	chr11	7439195	7439533	+	0	NA	Intergenic	Intergenic	-225441	NM_008343	16009	Mm.29254	NM_008343	ENSMUSG00000020427	Igfbp3	AI649005|IGFBP-3|IGgfbp3	insulin-like growth factor binding protein 3	protein-coding
upeaks-40560	chr7	92933517	92933722	+	0	NA	3' UTR (NM_028243, exon 9 of 9)	3' UTR (NM_028243, exon 9 of 9)	58366	NM_028243	72461	Mm.389969	NM_028243	ENSMUSG00000061119	Prcp	2510048K03Rik|2610104A14Rik|AI451719|HUMPCP|PCP	prolylcarboxypeptidase (angiotensinase C)	protein-coding
upeaks-40178	chr7	71400234	71400619	+	0	NA	Intergenic	Intergenic	-509269	NR_130995	78156	Mm.243818	NR_130995	ENSMUSG00000108669	4930441H08Rik	-	RIKEN cDNA 4930441H08 gene	ncRNA
upeaks-40565	chr7	93093773	93094042	+	0	NA	Intergenic	Intergenic	14028	NM_021427	58238	Mm.113787	NM_021427	ENSMUSG00000051515	Fam181b	A830059I20Rik|AB041569	family with sequence similarity 181, member B	protein-coding
upeaks-32184	chr4	126600528	126600795	+	0	NA	Intergenic	Intergenic	-9193	NM_001013755	230757	Mm.296838	NM_001013755	ENSMUSG00000073755	5730409E04Rik	7530403E16Rik|AI849033	RIKEN cDNA 5730409E04Rik gene	protein-coding
upeaks-37722	chr6	94071797	94071996	+	0	NA	intron (NM_001029850, intron 1 of 23)	intron (NM_001029850, intron 1 of 23)	-158206	NM_001286788	14924	Mm.217216	NM_010367	ENSMUSG00000045095	Magi1	AIP3|BAP1|Baiap1|Gukmi1|MAGI1c|Magi-1|TNRC19|WWP3|mKIAA4129	membrane associated guanylate kinase, WW and PDZ domain containing 1	protein-coding
upeaks-13362	chr14	8257968	8258253	+	0	NA	intron (NM_053115, intron 1 of 14)	intron (NM_053115, intron 1 of 14)	729	NM_001161667	93732	Mm.28700	NM_053115	ENSMUSG00000021751	Acox2	THCCox	acyl-Coenzyme A oxidase 2, branched chain	protein-coding
upeaks-11991	chr13	49430610	49430809	+	0	NA	intron (NR_075085, intron 2 of 13)	L1ME4c|LINE|L1	9095	NM_001276399	75678	Mm.390586	NM_199056	ENSMUSG00000021385	Ippk	1810043M15Rik|InsP6	inositol 1,3,4,5,6-pentakisphosphate 2-kinase	protein-coding
upeaks-8602	chr11	108251271	108251589	+	0	NA	intron (NM_011101, intron 2 of 16)	intron (NM_011101, intron 2 of 16)	92458	NM_011101	18750	Mm.222178	NM_011101	ENSMUSG00000050965	Prkca	AI875142|Pkca	protein kinase C, alpha	protein-coding
upeaks-36946	chr6	48741685	48742048	+	0	NA	intron (NM_175860, intron 2 of 2)	RSINE1|SINE|B4	2819	NM_175860	16205	Mm.252599	NM_008376	ENSMUSG00000090019	Gimap1	IAP38|Imap38|imap	GTPase, IMAP family member 1	protein-coding
upeaks-752	chr1	60657033	60657283	+	0	NA	Intergenic	Intergenic	-89230	NM_007642	12487	Mm.255003	NM_007642	ENSMUSG00000026012	Cd28	-	CD28 antigen	protein-coding
upeaks-1685	chr1	127086139	127086552	+	0	NA	Intergenic	Lx8|LINE|L1	-118641	NM_145128	107895	Mm.214682	NM_145128	ENSMUSG00000036155	Mgat5	4930471A21Rik|5330407H02Rik|AI480971|GlcNAc-TV	mannoside acetylglucosaminyltransferase 5	protein-coding
upeaks-33582	chr5	24609264	24609631	+	0	NA	Intergenic	Intergenic	-7445	NM_025891	66993	Mm.436539	NM_025891	ENSMUSG00000028949	Smarcd3	1500001J14Rik|2210409C08Rik|BAF60C	SWI/SNF related, matrix associated, actin dependent regulator of chromatin, subfamily d, member 3	protein-coding
upeaks-18003	chr16	45349564	45349915	+	0	NA	Intergenic	Intergenic	59314	NM_010818	17470	Mm.245851	NM_010818	ENSMUSG00000022661	Cd200	Mox2|OX2	CD200 antigen	protein-coding
upeaks-30406	chr4	13242302	13242504	+	0	NA	Intergenic	Intergenic	335566	NM_001171801	208820	Mm.12057	NM_173746	ENSMUSG00000055963	Triqk	C130086A10|Gm11818|OTTMUSG00000004461	triple QxxK/R motif containing	protein-coding
upeaks-10650	chr12	102423629	102423996	+	0	NA	intron (NM_011175, intron 1 of 13)	intron (NM_011175, intron 1 of 13)	16001	NM_011175	19141	Mm.17185	NM_011175	ENSMUSG00000021190	Lgmn	AEP|AI746452|AU022324|Prsc1	legumain	protein-coding
upeaks-21264	chr18	38276557	38276766	+	0	NA	intron (NM_017378, intron 2 of 3)	intron (NM_017378, intron 2 of 3)	7740	NM_017378	53601	Mm.12862	NM_017378	ENSMUSG00000024440	Pcdh12	Pcdh14|VE-cad-2	protocadherin 12	protein-coding
upeaks-10648	chr12	102320041	102320251	+	0	NA	intron (NM_177620, intron 2 of 9)	ORR1E|LTR|ERVL-MaLR	36505	NM_001161365	217835	Mm.24145	NM_177620	ENSMUSG00000044456	Rin3	6430500K07|C86933	Ras and Rab interactor 3	protein-coding
upeaks-47263	chrX	20548664	20548877	+	0	NA	Intergenic	Intergenic	-1048	NM_009060	19733	Mm.2118	NM_009060	ENSMUSG00000023070	Rgn	AI265316|GNL|SMP30	regucalcin	protein-coding
upeaks-40616	chr7	97830807	97831028	+	0	NA	Intergenic	Intergenic	-12022	NM_011035	18479	Mm.260227	NM_011035	ENSMUSG00000030774	Pak1	AW045634|PAK-1|Paka	p21 protein (Cdc42/Rac)-activated kinase 1	protein-coding
upeaks-36657	chr6	31642440	31642870	+	0	NA	Intergenic	Intergenic	-78718	NM_013723	27205	Mm.89918	NM_013723	ENSMUSG00000025608	Podxl	AW121214|Ly102|PC|PCLP-1|Pclp1	podocalyxin-like	protein-coding
upeaks-37312	chr6	72292974	72293375	+	0	NA	Intergenic	Intergenic	-11436	NM_001282071	20388	Mm.46033	NM_147779	ENSMUSG00000056370	Sftpb	AI562151|SF-B|SP-B|Sftp-3|Sftp3	surfactant associated protein B	protein-coding
upeaks-6553	chr11	43914834	43915209	+	0	NA	Intergenic	Intergenic	-13784	NM_001284380	11548	Mm.39086	NM_007416	ENSMUSG00000050541	Adra1b	[a]1b	adrenergic receptor, alpha 1b	protein-coding
upeaks-29186	chr3	107637840	107638112	+	0	NA	Intergenic	MTD|LTR|ERVL-MaLR	-6266	NM_153563	229707	Mm.278643	NM_153563	ENSMUSG00000014601	Strip1	6330569M22Rik|6530401O14Rik|Fam40a	striatin interacting protein 1	protein-coding
upeaks-47413	chrX	57378612	57378971	+	0	NA	Intergenic	Intergenic	12718	NR_002903	353374		NR_002903	ENSMUSG00000065110	Snord61	MBII-342|Rnu61	small nucleolar RNA, C/D box 61	snoRNA
upeaks-18202	chr16	63361052	63361382	+	0	NA	Intergenic	L2|LINE|L2	502940	NM_010140	13837	Mm.1977	NM_010140	ENSMUSG00000052504	Epha3	AW492086|Cek4|ETK1|End3|Hek|Hek4|Mek4|Tyro4	Eph receptor A3	protein-coding
upeaks-15522	chr15	31226390	31226763	+	0	NA	intron (NM_146057, intron 1 of 3)	intron (NM_146057, intron 1 of 3)	2191	NM_146057	223453	Mm.222867	NM_146057	ENSMUSG00000039168	Dap	4921531N22Rik|AI789753|AU040360	death-associated protein	protein-coding
upeaks-16178	chr15	76162790	76163028	+	0	NA	Intergenic	Intergenic	32801	NM_201394	18810	Mm.234912	NM_011117	ENSMUSG00000022565	Plec	AA591047|AU042537|EBS1|PCN|PLTN|Plec1	plectin	protein-coding
upeaks-15257	chr15	4228066	4228487	+	0	NA	Intergenic	Intergenic	-147215	NM_177355	239318	Mm.308996	NM_177355	ENSMUSG00000049148	Plcxd3	B130016O10Rik	phosphatidylinositol-specific phospholipase C, X domain containing 3	protein-coding
upeaks-34289	chr5	67439808	67440105	+	0	NA	Intergenic	Intergenic	-12157	NM_001164806	666938	Mm.101339	NM_001164806	ENSMUSG00000092060	Bend4	D330027G24Rik|EG666938	BEN domain containing 4	protein-coding
upeaks-38270	chr6	124375526	124375793	+	0	NA	Intergenic	Intergenic	-11173	NR_131162	72268	Mm.420740	NR_131162		1700027F06Rik	-	RIKEN cDNA 1700027F06 gene	ncRNA
upeaks-19838	chr17	47754281	47754484	+	0	NA	intron (NM_001161723, intron 1 of 8)	intron (NM_001161723, intron 1 of 8)	16451	NM_001161723	21425	Mm.2305	NM_011549	ENSMUSG00000023990	Tfeb	Tcfeb|bHLHe35	transcription factor EB	protein-coding
upeaks-34097	chr5	53106753	53107041	+	0	NA	TTS (NM_172710)	TTS (NM_172710)	57544	NM_011402	20531	Mm.284891	NM_011402	ENSMUSG00000029188	Slc34a2	AA536683|D5Ertd227e|NaPi-2b|Npt2b	solute carrier family 34 (sodium phosphate), member 2	protein-coding
upeaks-33619	chr5	27421229	27421428	+	0	NA	intron (NM_010075, intron 3 of 25)	RLTR9D|LTR|ERVK	80064	NM_028561	73526	Mm.389608	NM_028561	ENSMUSG00000048703	Speer4b	1700081O22Rik|SPEER-4B	spermatogenesis associated glutamate (E)-rich protein 4B	protein-coding
upeaks-16506	chr15	83305507	83305706	+	0	NA	intron (NM_025445, intron 14 of 15)	intron (NM_025445, intron 14 of 15)	44641	NM_025445	66251	Mm.258910	NM_025445	ENSMUSG00000054277	Arfgap3	0610009H19Rik|1810004P07Rik|1810035F16Rik|9130416J18Rik|Arfgap1	ADP-ribosylation factor GTPase activating protein 3	protein-coding
upeaks-4979	chr10	92412865	92413073	+	0	NA	Intergenic	MER21C|LTR|ERVL	-37596	NR_046027	627800	Mm.391417	NR_046027	ENSMUSG00000098040	Gm20757	-	predicted gene, 20757	ncRNA
upeaks-29839	chr3	141819358	141819613	+	0	NA	intron (NM_001293561, intron 15 of 16)	intron (NM_001293561, intron 15 of 16)	112103	NM_001277220	12167	Mm.39089	NM_007560	ENSMUSG00000052430	Bmpr1b	AI385617|ALK-6|AV355320|Acvrlk6|Alk6|BMPR-1B|BMPR-IB|CFK-43a|SKR6	bone morphogenetic protein receptor, type 1B	protein-coding
upeaks-32444	chr4	133396441	133396640	+	0	NA	intron (NM_016981, intron 1 of 11)	MIRb|SINE|MIR	26764	NR_039582	100628620		NR_039582	ENSMUSG00000092745	Mir5122	mmu-mir-5122|mu-mir-5122	microRNA 5122	ncRNA
upeaks-39535	chr7	30000640	30001045	+	0	NA	intron (NM_001167873, intron 6 of 9)	intron (NM_001167873, intron 6 of 9)	16887	NM_001167872	243905	Mm.322432	NM_001033355	ENSMUSG00000074221	Zfp568	C80731|Gm1691|Znf568|chato	zinc finger protein 568	protein-coding
upeaks-16726	chr15	92276951	92277169	+	0	NA	intron (NM_007727, intron 15 of 23)	intron (NM_007727, intron 15 of 23)	115703	NM_001159647	12805	Mm.4911	NM_007727	ENSMUSG00000055022	Cntn1	AW495098|CNTN|F3cam|usl	contactin 1	protein-coding
upeaks-42307	chr8	26770342	26770860	+	0	NA	Intergenic	Intergenic	53822	NR_045904	72316	Mm.490534	NR_045904	ENSMUSG00000100335	2310008N11Rik	-	RIKEN cDNA 2310008N11 gene	ncRNA
upeaks-44546	chr9	14307464	14307767	+	0	NA	intron (NM_030261, intron 2 of 9)	intron (NM_030261, intron 2 of 9)	31314	NM_030261	75747	Mm.325126	NM_030261	ENSMUSG00000032009	Sesn3	5630400E15Rik|BC003348|SEST3	sestrin 3	protein-coding
upeaks-14408	chr14	63749636	63750037	+	0	NA	intron (NM_173393, intron 1 of 2)	intron (NM_173393, intron 1 of 2)	22647	NR_030611	100124452		NR_030611	ENSMUSG00000076049	Mir598	Mirn598|mir-598|mmu-mir-598	microRNA 598	ncRNA
upeaks-20152	chr17	67512667	67512985	+	0	NA	Intergenic	Intergenic	119897	NM_001033340	240131	Mm.295736	NM_001033340	ENSMUSG00000073375	Lrrc30	Gm326	leucine rich repeat containing 30	protein-coding
upeaks-45370	chr9	55581563	55581796	+	0	NA	intron (NM_001081341, intron 29 of 32)	intron (NM_001081341, intron 29 of 32)	40530	NM_027397	104360	Mm.273996	NM_027397	ENSMUSG00000032318	Isl2	3110001N10Rik	insulin related protein 2 (islet 2)	protein-coding
upeaks-11866	chr13	44171637	44171836	+	0	NA	Intergenic	Intergenic	44751	NR_045088	100503592	Mm.184925	NR_045088		A330076C08Rik	-	RIKEN cDNA A330076C08 gene	ncRNA
upeaks-28981	chr3	99766495	99766926	+	0	NA	Intergenic	Intergenic	-118707	NM_028892	74362	Mm.55847	NM_028892	ENSMUSG00000027867	Spag17	4931427F14Rik|PF6|Spag17-ps	sperm associated antigen 17	protein-coding
upeaks-23476	chr19	56856467	56856689	+	0	NA	intron (NM_001002238, intron 18 of 25)	intron (NM_001002238, intron 18 of 25)	-17838	NM_172840	240675	Mm.129534	NM_172840	ENSMUSG00000025082	Vwa2	Amaco	von Willebrand factor A domain containing 2	protein-coding
upeaks-2947	chr1	184864452	184864713	+	0	NA	Intergenic	Intergenic	18454	NM_178692	226777	Mm.169542	NM_178692	ENSMUSG00000039349	C130074G19Rik	-	RIKEN cDNA C130074G19 gene	protein-coding
upeaks-28938	chr3	97939643	97939910	+	0	NA	intron (NM_001033779, intron 1 of 1)	intron (NM_001033779, intron 1 of 1)	9603	NM_001033779	433632	Mm.212421	NM_001033779		Gm5544	EG433632	predicted gene 5544	protein-coding
upeaks-27856	chr3	32658824	32659170	+	0	NA	Intergenic	Intergenic	-42462	NM_013531	14696	Mm.139192	NM_013531	ENSMUSG00000027669	Gnb4	6720453A21Rik|G(beta)4	guanine nucleotide binding protein (G protein), beta 4	protein-coding
upeaks-5216	chr10	105793903	105794314	+	0	NA	intron (NM_207522, intron 7 of 11)	intron (NM_207522, intron 7 of 11)	47272	NM_207522	216292	Mm.250875	NM_207522	ENSMUSG00000036009	Mettl25	-	methyltransferase like 25	protein-coding
upeaks-12874	chr13	99048614	99049093	+	0	NA	Intergenic	LTR40c|LTR|ERVL	39068	NR_045495	69603	Mm.390632	NR_045495	ENSMUSG00000100410	2310020H05Rik	-	RIKEN cDNA 2310020H05 gene	ncRNA
upeaks-35011	chr5	112302330	112302640	+	0	NA	intron (NM_001326590, intron 1 of 5)	intron (NM_001326590, intron 1 of 5)	-23884	NM_018783	54723	Mm.172947	NM_018783	ENSMUSG00000029345	Tfip11	2810002G02Rik|AF097181|AW046167|Srr1|TIP33|Tip39	tuftelin interacting protein 11	protein-coding
upeaks-4873	chr10	86342734	86343081	+	0	NA	intron (NM_011595, intron 2 of 4)	MIR|SINE|MIR	42495	NM_011595	21859	Mm.4871	NM_011595	ENSMUSG00000020044	Timp3	Timp-3	tissue inhibitor of metalloproteinase 3	protein-coding
upeaks-10343	chr12	84400738	84400976	+	0	NA	promoter-TSS (NM_001286049)	promoter-TSS (NM_001286049)	77	NM_001286049	12499	Mm.10211	NM_007647	ENSMUSG00000021236	Entpd5	AI196558|AI987697|Cd39l4|ER-UDPase|NTPDase-5|NTPDase5|Pcph|mNTPase	ectonucleoside triphosphate diphosphohydrolase 5	protein-coding
upeaks-10622	chr12	100990394	100990666	+	0	NA	intron (NM_026681, intron 3 of 29)	intron (NM_026681, intron 3 of 29)	31238	NR_035421	100316805		NR_035421	ENSMUSG00000080575	Mir1190	Mirn1190|mmu-mir-1190	microRNA 1190	ncRNA
upeaks-46205	chr9	89915943	89916143	+	0	NA	TTS (NM_001039655)	TTS (NM_001039655)	6268	NM_011245	19417	Mm.44561	NM_011245	ENSMUSG00000032356	Rasgrf1	AI844718|CDC25|CDC25Mm|Gnrp|Grf1|Grfbeta|P190-A|Ras-GRF1|p190|p190RhoGEF	RAS protein-specific guanine nucleotide-releasing factor 1	protein-coding
upeaks-38333	chr6	125354736	125355133	+	0	NA	intron (NM_011609, intron 1 of 9)	intron (NM_011609, intron 1 of 9)	5211	NM_011609	21937	Mm.1258	NM_011609	ENSMUSG00000030341	Tnfrsf1a	CD120a|FPF|TNF-R|TNF-R-I|TNF-R1|TNF-R55|TNF-alphaR1|TNFAR|TNFR60|TNFRI|TNFRp55|TNFalpha-R1|Tnfr-2|Tnfr1|p55|p55-R	tumor necrosis factor receptor superfamily, member 1a	protein-coding
upeaks-36326	chr6	5408569	5408802	+	0	NA	intron (NM_023048, intron 3 of 5)	MamSINE1|SINE|tRNA	25299	NM_023048	65255	Mm.51340	NM_023048	ENSMUSG00000042607	Asb4	8430401O13Rik|AV117194|AW060255	ankyrin repeat and SOCS box-containing 4	protein-coding
upeaks-16843	chr15	97467364	97467690	+	0	NA	Intergenic	MER21B|LTR|ERVL	-220240	NM_178114	105827	Mm.24005	NM_178114	ENSMUSG00000048218	Amigo2	AI415330|AMIGO-2|AW208913|Ali1	adhesion molecule with Ig like domain 2	protein-coding
upeaks-1832	chr1	133124154	133124448	+	0	NA	Intergenic	ID_B1|SINE|B4	-6865	NM_133819	108954	Mm.293628	NM_133819	ENSMUSG00000046062	Ppp1r15b	1810033K10Rik|AI606441|C530022L24Rik|CReP	protein phosphatase 1, regulatory (inhibitor) subunit 15b	protein-coding
upeaks-5363	chr10	112973147	112973618	+	0	NA	Intergenic	B4A|SINE|B4	-44356	NM_001033474	382423	Mm.431239	NM_001033474	ENSMUSG00000074748	Atxn7l3b	4921506J03Rik|6230409E21Rik|AI315132|ENSMUSG00000074747	ataxin 7-like 3B	protein-coding
upeaks-7809	chr11	87289364	87289626	+	0	NA	intron (NR_106195, intron 6 of 8)	MTE-int|LTR|ERVL-MaLR	69499	NM_177167	320472	Mm.341988	NM_177167	ENSMUSG00000046442	Ppm1e	AW049266|B930008A12Rik|POPX1|PP2CH|mKIAA1072	protein phosphatase 1E (PP2C domain containing)	protein-coding
upeaks-11189	chr13	9163035	9163286	+	0	NA	intron (NM_172585, intron 13 of 17)	intron (NM_172585, intron 13 of 17)	69279	NM_172585	217980	Mm.234944	NM_172585	ENSMUSG00000033499	Larp4b	A630096F19|AI256361|D13Wsu64e|Larp5	La ribonucleoprotein domain family, member 4B	protein-coding
upeaks-44570	chr9	15245365	15245728	+	0	NA	intron (NM_026955, intron 1 of 3)	intron (NM_026955, intron 1 of 3)	6501	NM_026955	69137	Mm.41396	NM_026955	ENSMUSG00000031937	Vstm5	2200002K05Rik	V-set and transmembrane domain containing 5	protein-coding
upeaks-11296	chr13	18218583	18219000	+	0	NA	intron (NM_175006, intron 3 of 7)	intron (NM_175006, intron 3 of 7)	-118589	NR_046032	73992	Mm.159110	NR_046032		4930448F12Rik	-	RIKEN cDNA 4930448F12 gene	ncRNA
upeaks-306	chr1	24613514	24613848	+	0	NA	Intergenic	Intergenic	-26244	NM_007733	12823	Mm.329196	NM_007733	ENSMUSG00000026141	Col19a1	-	collagen, type XIX, alpha 1	protein-coding
upeaks-2461	chr1	165625459	165625664	+	0	NA	intron (NM_001347128, intron 1 of 2)	L1MC4|LINE|L1	8980	NM_001001880	68481	Mm.46438	NM_001001880	ENSMUSG00000026566	Mpzl1	1110007A10Rik|PZR	myelin protein zero-like 1	protein-coding
upeaks-14521	chr14	68461470	68461803	+	0	NA	Intergenic	Intergenic	72053	NM_007402	11500	Mm.261495	NM_007402	ENSMUSG00000022056	Adam7	ADAM 7|EAP1|EAPI	a disintegrin and metallopeptidase domain 7	protein-coding
upeaks-35892	chr5	140360424	140360754	+	0	NA	intron (NM_172277, intron 1 of 10)	intron (NM_172277, intron 1 of 10)	28667	NM_008637	17766	Mm.118846	NM_008637	ENSMUSG00000036639	Nudt1	Mth1	nudix (nucleoside diphosphate linked moiety X)-type motif 1	protein-coding
upeaks-34403	chr5	75826343	75826667	+	0	NA	Intergenic	Intergenic	151923	NM_010612	16542	Mm.285	NM_010612	ENSMUSG00000062960	Kdr	6130401C07|Flk-1|Flk1|Krd-1|Ly73|VEGFR-2|VEGFR2|sVEGFR-2	kinase insert domain protein receptor	protein-coding
upeaks-33698	chr5	31004246	31004590	+	0	NA	Intergenic	Intergenic	35741	NM_053085	69852	Mm.57874	NM_053085	ENSMUSG00000006642	Tcf23	2010002O16Rik|Out|bHLHa24	transcription factor 23	protein-coding
upeaks-9083	chr11	120518023	120518234	+	0	NA	Intergenic	Intergenic	-12599	NM_008101	14527	Mm.22329	NM_008101	ENSMUSG00000025127	Gcgr	GR	glucagon receptor	protein-coding
upeaks-47245	chrX	16830818	16831026	+	0	NA	Intergenic	Intergenic	-13556	NM_172778	109731	Mm.241656	NM_172778	ENSMUSG00000040147	Maob	6330414K01Rik|MAO-B	monoamine oxidase B	protein-coding
upeaks-30171	chr3	155940262	155940760	+	0	NA	Intergenic	RLTR1D|LTR|ERV1	-35843	NR_040553	329780	Mm.119000	NR_040553	ENSMUSG00000104553	9330178D15Rik	9330178D15	RIKEN cDNA 9330178D15 gene	ncRNA
upeaks-24950	chr2	70923130	70923420	+	0	NA	Intergenic	Intergenic	95099	NM_001110512	228019	Mm.490343	NM_145524	ENSMUSG00000041975	Mettl8	BC004636|Tip	methyltransferase like 8	protein-coding
upeaks-24984	chr2	71919242	71919441	+	0	NA	Intergenic	Intergenic	46117	NM_172665	228026	Mm.34411	NM_172665	ENSMUSG00000006494	Pdk1	B830012B01|D530020C15Rik	pyruvate dehydrogenase kinase, isoenzyme 1	protein-coding
upeaks-3211	chr1	194318492	194318695	+	0	NA	Intergenic	Intergenic	-95834	NR_040477	74942	Mm.60689	NR_040477	ENSMUSG00000103692	4930503O07Rik	-	RIKEN cDNA 4930503O07 gene	ncRNA
upeaks-31601	chr4	105205586	105205807	+	0	NA	intron (NM_080555, intron 2 of 5)	intron (NM_080555, intron 2 of 5)	48349	NM_080555	67916	Mm.348326	NM_080555	ENSMUSG00000028517	Plpp3	1110003O22Rik|2610002D05Rik|AV025606|D4Bwg0538e|D4Bwg1535e|Lpp3|Ppab2b|Ppap2b	phospholipid phosphatase 3	protein-coding
upeaks-35166	chr5	115866316	115866562	+	0	NA	intron (NM_007708, intron 4 of 46)	intron (NM_007708, intron 4 of 46)	20783	NM_007708	12704	Mm.8321	NM_007708	ENSMUSG00000029516	Cit	C030025P15Rik|CRIK|CRIK-SK|Cit-k	citron	protein-coding
upeaks-33798	chr5	34379212	34379421	+	0	NA	intron (NM_001243123, intron 1 of 20)	intron (NM_001243123, intron 1 of 20)	9383	NM_001243123	231128	Mm.286885	NM_001030306	ENSMUSG00000037210	Fam193a	-	family with sequence similarity 193, member A	protein-coding
upeaks-44991	chr9	39739406	39739606	+	0	NA	Intergenic	RLTR1D|LTR|ERV1	2689	NM_146609	258602	Mm.296766	NM_146609	ENSMUSG00000094353	Olfr150	M93|MOR171-18	olfactory receptor 150	protein-coding
upeaks-10310	chr12	83579088	83579603	+	0	NA	intron (NM_183154, intron 2 of 11)	intron (NM_183154, intron 2 of 11)	17802	NM_183154	217695	Mm.59257	NM_183154	ENSMUSG00000042628	Zfyve1	DFCP1|G630053K23|TAFF1|ZNFN2A1|mKIAA1589	zinc finger, FYVE domain containing 1	protein-coding
upeaks-15420	chr15	13419686	13419954	+	0	NA	Intergenic	Intergenic	-246145	NM_007666	12563	Mm.57048	NM_007666	ENSMUSG00000039385	Cdh6	cad6	cadherin 6	protein-coding
upeaks-222	chr1	19109815	19110016	+	0	NA	intron (NM_153154, intron 3 of 7)	intron (NM_153154, intron 3 of 7)	6893	NM_153154	226896	Mm.244858	NM_153154	ENSMUSG00000042596	Tfap2d	Tcfap2d	transcription factor AP-2, delta	protein-coding
upeaks-2163	chr1	153501756	153502351	+	0	NA	TTS (NM_028749)	TTS (NM_028749)	-14393	NM_007842	13211	Mm.20000	NM_007842	ENSMUSG00000042699	Dhx9	AI326842|Ddx9|HEL-5|NDHII|RHA|mHEL-5	DEAH (Asp-Glu-Ala-His) box polypeptide 9	protein-coding
upeaks-6459	chr11	35268957	35269365	+	0	NA	intron (NM_011412, intron 4 of 35)	intron (NM_011412, intron 4 of 35)	147705	NM_011412	20564	Mm.478604	NM_011412	ENSMUSG00000056427	Slit3	Slil2|Slit1|b2b2362.1Clo	slit homolog 3 (Drosophila)	protein-coding
upeaks-25190	chr2	84459623	84459959	+	0	NA	intron (NM_001177320, intron 2 of 7)	intron (NM_001177320, intron 2 of 7)	14383	NM_011576	21788	Mm.124316	NM_011576	ENSMUSG00000027082	Tfpi	A630013F22Rik|AW552122|EPI|LACI	tissue factor pathway inhibitor	protein-coding
upeaks-25598	chr2	110005913	110006178	+	0	NA	intron (NM_172671, intron 13 of 17)	intron (NM_172671, intron 13 of 17)	-11772	NM_026613	68201	Mm.181767	NM_026613	ENSMUSG00000027160	Ccdc34	2810027O19Rik|4930522P10Rik|AI596202	coiled-coil domain containing 34	protein-coding
upeaks-36192	chr5	149526420	149526722	+	0	NA	intron (NR_045423, intron 1 of 4)	intron (NR_045423, intron 1 of 4)	-2108	NM_029440	381693	Mm.136919	NM_029440	ENSMUSG00000029658	Wdr95	4930434E21Rik	WD40 repeat domain 95	protein-coding
upeaks-12192	chr13	58066847	58067053	+	0	NA	intron (NM_001195075, intron 6 of 16)	intron (NM_001195075, intron 6 of 16)	35478	NM_001195075	100503085	Mm.379256	NM_001195075	ENSMUSG00000014164	Klhl3	7530408C15Rik|AI430941|EG627648	kelch-like 3	protein-coding
upeaks-24475	chr2	37570721	37571094	+	0	NA	3' UTR (NM_009261, exon 17 of 17)	3' UTR (NM_009261, exon 17 of 17)	54281	NM_177383	338346	Mm.445325	NM_177383	ENSMUSG00000053164	Gpr21	C230004C13Rik	G protein-coupled receptor 21	protein-coding
upeaks-33912	chr5	38085531	38085810	+	0	NA	intron (NM_001289536, intron 1 of 9)	intron (NM_001289536, intron 1 of 9)	46440	NM_026959	71116	Mm.18959	NM_026959	ENSMUSG00000029125	Stx18	1810035L21Rik|4933425D03Rik|AU041562	syntaxin 18	protein-coding
upeaks-3363	chr10	9699067	9699474	+	0	NA	Intergenic	ORR1E|LTR|ERVL-MaLR	14548	NR_038036	620417	Mm.378085	NR_038036		Gm6150	-	predicted gene 6150	ncRNA
upeaks-29875	chr3	143189015	143189229	+	0	NA	Intergenic	Intergenic	-53933	NR_040551	320072	Mm.136397	NR_040551	ENSMUSG00000105923	A830019L24Rik	-	RIKEN cDNA A830019L24 gene	ncRNA
upeaks-13980	chr14	45583562	45583765	+	0	NA	Intergenic	Intergenic	39953	NR_045809	67651	Mm.55930	NR_045809		4930527F14Rik	-	RIKEN cDNA 4930527F14 gene	ncRNA
upeaks-332	chr1	31156210	31156637	+	0	NA	intron (NR_033445, intron 2 of 2)	intron (NR_033445, intron 2 of 2)	-20012	NM_153601	266744	Mm.389093	NM_153601	ENSMUSG00000050217	Lgsn	Gluld1|Lgs|lengsin	lengsin, lens protein with glutamine synthetase domain	protein-coding
upeaks-18891	chr17	12194301	12194690	+	0	NA	intron (NM_026644, intron 2 of 8)	RMER5|LTR|ERV1	75211	NM_026644	68262	Mm.258300	NM_026644	ENSMUSG00000023827	Agpat4	1500003P24Rik	1-acylglycerol-3-phosphate O-acyltransferase 4 (lysophosphatidic acid acyltransferase, delta)	protein-coding
upeaks-37881	chr6	101882826	101883089	+	0	NA	Intergenic	Intergenic	108708	NR_027989	207157	Mm.57632	NM_177579	ENSMUSG00000052236	Gm9871	0610005I04|EG207157|ENSMUSG00000052236	predicted gene 9871	ncRNA
upeaks-5480	chr10	118803946	118804348	+	0	NA	Intergenic	RLTR42-int|LTR|ERVK	64756	NM_001014390	69181	Mm.45565	NM_001014390	ENSMUSG00000028630	Dyrk2	1810038L18Rik	dual-specificity tyrosine-(Y)-phosphorylation regulated kinase 2	protein-coding
upeaks-3104	chr1	191132943	191133335	+	0	NA	Intergenic	Intergenic	31678	NM_001109759	619288	Mm.61148	NM_001109759	ENSMUSG00000091017	Fam71a	4933417M04Rik|GARI-L4	family with sequence similarity 71, member A	protein-coding
upeaks-3794	chr10	37220375	37220586	+	0	NA	Intergenic	Intergenic	-81554	NM_008538	17118	Mm.30059	NM_008538	ENSMUSG00000069662	Marcks	Macs|PKCSL	myristoylated alanine rich protein kinase C substrate	protein-coding
upeaks-803	chr1	63368088	63368316	+	0	NA	Intergenic	LTR16A|LTR|ERVL	-77689	NM_011780	23792	Mm.124892	NM_011780	ENSMUSG00000025964	Adam23	AW046396|MDC3	a disintegrin and metallopeptidase domain 23	protein-coding
upeaks-28015	chr3	41581492	41581761	+	0	NA	intron (NM_001130184, intron 2 of 10)	intron (NM_001130184, intron 2 of 10)	16746	NM_001130186	269424	Mm.286285	NM_172303	ENSMUSG00000025764	Jade1	AU041499|D530048A03Rik|Phf17|mKIAA1807	jade family PHD finger 1	protein-coding
upeaks-3984	chr10	44520138	44520465	+	0	NA	Intergenic	Intergenic	-61553	NM_007548	12142	Mm.4800	NM_007548	ENSMUSG00000038151	Prdm1	Blimp-1|Blimp1|PRDI-BF1|ZNFPR1A1|b2b1765Clo	PR domain containing 1, with ZNF domain	protein-coding
upeaks-4419	chr10	71368437	71368669	+	0	NA	intron (NM_027184, intron 3 of 5)	intron (NM_027184, intron 3 of 5)	20790	NM_027184	69718	Mm.245867	NM_027184	ENSMUSG00000060733	Ipmk	2410017C19Rik|AA408208|Impk	inositol polyphosphate multikinase	protein-coding
upeaks-29378	chr3	121483602	121483872	+	0	NA	intron (NM_145394, intron 12 of 14)	intron (NM_145394, intron 12 of 14)	48607	NM_145394	213603	Mm.33062	NM_145394	ENSMUSG00000039865	Slc44a3	BC010552	solute carrier family 44, member 3	protein-coding
upeaks-9246	chr12	8803622	8803821	+	0	NA	Intergenic	Intergenic	32325	NM_011519	20969	Mm.2580	NM_011519	ENSMUSG00000020592	Sdc1	AA408134|AA409076|CD138|Sstn|Synd|Synd1|syn-1	syndecan 1	protein-coding
upeaks-10575	chr12	99406419	99406742	+	0	NA	intron (NM_183186, intron 1 of 5)	intron (NM_183186, intron 1 of 5)	43494	NM_183186	71375	Mm.341972	NM_183186	ENSMUSG00000033713	Foxn3	5430426H20Rik|AA589593|AW556347|Ches1|Ches1l|HTLFL1	forkhead box N3	protein-coding
upeaks-10881	chr12	111268127	111268443	+	0	NA	Intergenic	Intergenic	-2811	NM_033603	93835	Mm.197639	NM_033603	ENSMUSG00000021278	Amn	-	amnionless	protein-coding
upeaks-41412	chr7	128913994	128914375	+	0	NA	Intergenic	RLTR40|LTR|ERVK	169314	NM_001029982	207352	Mm.297105	NM_001029982	ENSMUSG00000055319	Sec23ip	D7Ertd373e|p125	Sec23 interacting protein	protein-coding
upeaks-23630	chr2	4801145	4801399	+	0	NA	3' UTR (NM_001190400, exon 9 of 9)	3' UTR (NM_001190400, exon 9 of 9)	-80292	NM_175400	109079	Mm.34329	NM_175400	ENSMUSG00000026662	Sephs1	1110046B24Rik|AA589574|AI505014|AW111620|SELD|SPS|SPS1	selenophosphate synthetase 1	protein-coding
upeaks-13491	chr14	18170159	18170439	+	0	NA	Intergenic	Intergenic	68807	NM_011584	353187	Mm.26587	NM_011584	ENSMUSG00000021775	Nr1d2	RVR|Rev-erb	nuclear receptor subfamily 1, group D, member 2	protein-coding
upeaks-13182	chr13	113755056	113755318	+	0	NA	Intergenic	Intergenic	-39321	NM_172595	218639	Mm.79837	NM_172595	ENSMUSG00000042348	Arl15	A430036I03|Arfrp2|C230032K13Rik	ADP-ribosylation factor-like 15	protein-coding
upeaks-2901	chr1	182954735	182955297	+	0	NA	intron (NM_016928, intron 1 of 3)	intron (NM_016928, intron 1 of 3)	228	NM_016928	53791	Mm.116894	NM_016928	ENSMUSG00000079164	Tlr5	-	toll-like receptor 5	protein-coding
upeaks-45343	chr9	54745810	54746023	+	0	NA	Intergenic	Intergenic	-11367	NM_001025376	66317	Mm.28437	NM_023191	ENSMUSG00000061559	Wdr61	2700038L12Rik|2810418I05Rik|REC14	WD repeat domain 61	protein-coding
upeaks-21774	chr18	66503919	66504260	+	0	NA	promoter-TSS (NR_040528)	promoter-TSS (NR_040528)	-89	NR_040528	100503565	Mm.98256	NR_040528		Gm9926	ENSMUSG00000053891	predicted gene 9926	ncRNA
upeaks-12642	chr13	85126817	85127581	+	0	NA	Intergenic	Intergenic	-62186	NM_001347587	66671	Mm.18474	NM_023243	ENSMUSG00000021548	Ccnh	6330408H09Rik|AI661354|AV102684|AW538719	cyclin H	protein-coding
upeaks-8937	chr11	117154047	117154410	+	0	NA	intron (NM_001166507, intron 13 of 16)	intron (NM_001166507, intron 13 of 16)	39056	NM_001166507	74136	Mm.272312	NM_028777	ENSMUSG00000020823	Sec14l1	1200017E04Rik|2810012L19Rik|Naa-35	SEC14-like lipid binding 1	protein-coding
upeaks-8748	chr11	113735235	113735489	+	0	NA	intron (NM_001163346, intron 1 of 1)	intron (NM_001163346, intron 1 of 1)	15798	NM_020006	56699	Mm.293378	NM_020006	ENSMUSG00000041598	Cdc42ep4	1500041M20Rik|Borg4|CEP4	CDC42 effector protein (Rho GTPase binding) 4	protein-coding
upeaks-17651	chr16	29734378	29734577	+	0	NA	Intergenic	Intergenic	155143	NM_133752	74143	Mm.274285	NM_133752	ENSMUSG00000038084	Opa1	1200011N24Rik|AI225888|AI847218|lilr3|mKIAA0567	OPA1, mitochondrial dynamin like GTPase	protein-coding
upeaks-34184	chr5	64251515	64251866	+	0	NA	intron (NM_001289514, intron 1 of 18)	intron (NM_001289514, intron 1 of 18)	21333	NM_001289514	57915	Mm.286353	NM_019636	ENSMUSG00000029174	Tbc1d1	1110062G02Rik|AI385682|AW555803|Nob1|Nobq1|Tbc1|mKIAA1108	TBC1 domain family, member 1	protein-coding
upeaks-22935	chr19	34510475	34510908	+	0	NA	intron (NM_001111100, intron 4 of 9)	intron (NM_001111100, intron 4 of 9)	16783	NM_001111100	16889	Mm.157545	NM_021460	ENSMUSG00000024781	Lipa	AA960673|Lal|Lip-1|Lip1	lysosomal acid lipase A	protein-coding
upeaks-30464	chr4	20949779	20950185	+	0	NA	Intergenic	Intergenic	-171314	NM_172987	269513	Mm.317473	NM_172987	ENSMUSG00000055761	Nkain3	C530048M05|E130310K16Rik	Na+/K+ transporting ATPase interacting 3	protein-coding
upeaks-26783	chr2	157245028	157245432	+	0	NA	intron (NM_001039557, intron 8 of 24)	intron (NM_001039557, intron 8 of 24)	-33868	NM_019642	20014	Mm.22130	NM_019642	ENSMUSG00000027642	Rpn2	1300012C06Rik|AV261018|Rpn-2	ribophorin II	protein-coding
upeaks-23806	chr2	14235352	14235608	+	0	NA	intron (NM_008625, intron 1 of 29)	intron (NM_008625, intron 1 of 29)	6066	NM_008625	17533	Mm.2019	NM_008625	ENSMUSG00000026712	Mrc1	AW259686|CD206|MR	mannose receptor, C type 1	protein-coding
upeaks-15656	chr15	38271794	38272051	+	0	NA	Intergenic	Intergenic	28789	NM_001289471	21847	Mm.4292	NM_013692	ENSMUSG00000037465	Klf10	AI115143|EGR[a]|Egral|Gdnfif|TIEG-1|Tieg|Tieg1|mGIF	Kruppel-like factor 10	protein-coding
upeaks-48103	chrX	166645752	166646014	+	0	NA	Intergenic	Intergenic	-16142	NR_046015	382255	Mm.336320	NR_046015	ENSMUSG00000086860	Gm1720	-	predicted gene 1720	ncRNA
upeaks-1954	chr1	136229097	136229296	+	0	NA	intron (NM_028872, intron 1 of 9)	intron (NM_028872, intron 1 of 9)	5084	NM_028872	67313	Mm.36763	NM_028872	ENSMUSG00000041605	5730559C18Rik	1700034M08Rik|4933426C09Rik|AI586180|D1Mgi54	RIKEN cDNA 5730559C18 gene	protein-coding
upeaks-17545	chr16	22203536	22203877	+	0	NA	Intergenic	Intergenic	-40407	NM_183029	319765	Mm.489442	NM_183029	ENSMUSG00000033581	Igf2bp2	C330012H03Rik|IMP-2|Imp2|Neilsen	insulin-like growth factor 2 mRNA binding protein 2	protein-coding
upeaks-26565	chr2	150913950	150914174	+	0	NA	intron (NM_027014, intron 2 of 6)	intron (NM_027014, intron 2 of 6)	4468	NM_001163476	69270	Mm.271603	NM_027014	ENSMUSG00000027454	Gins1	2810418N01Rik|Gins4|PSF1|mKIAA0186	GINS complex subunit 1 (Psf1 homolog)	protein-coding
upeaks-16009	chr15	64564807	64565133	+	0	NA	Intergenic	RLTR47|LTR|ERVK	-182051	NM_001276467	13196	Mm.277236	NM_010026	ENSMUSG00000022377	Asap1	AV239055|DEF-1|Ddef1|PAP|mKIAA1249|s19	ArfGAP with SH3 domain, ankyrin repeat and PH domain1	protein-coding
upeaks-342	chr1	33754239	33754441	+	0	NA	intron (NM_145392, intron 1 of 2)	intron (NM_145392, intron 1 of 2)	3410	NM_145392	213539	Mm.247037	NM_145392	ENSMUSG00000042215	Bag2	2610042A13Rik|BC016230	BCL2-associated athanogene 2	protein-coding
upeaks-31778	chr4	111609256	111609658	+	0	NA	intron (NM_001048189, intron 9 of 12)	intron (NM_001048189, intron 9 of 12)	-110553	NM_026470	67946	Mm.275526	NM_026470	ENSMUSG00000034401	Spata6	1700062C23Rik|AI790763|Hash|KRP|Mash	spermatogenesis associated 6	protein-coding
upeaks-20901	chr18	14782852	14783591	+	0	NA	promoter-TSS (NM_001100449)	promoter-TSS (NM_001100449)	-24	NM_001100449	72504	Mm.312233	NM_001100449	ENSMUSG00000054321	Taf4b	105kDa|2610524B04Rik|4932409F03Rik|AW987595|TAFII-105|TAFII105|Taf2c2	TATA-box binding protein associated factor 4b	protein-coding
upeaks-26590	chr2	152011809	152012197	+	0	NA	Intergenic	Intergenic	12137	NM_001164820	69698	Mm.258262	NM_027172	ENSMUSG00000027463	Slc52a3	2310046K01Rik|RFT2	solute carrier protein family 52, member 3	protein-coding
upeaks-38814	chr6	145551047	145551246	+	0	NA	Intergenic	L1M4a1|LINE|L1	-64817	NM_009449	22147	Mm.270295	NM_009449	ENSMUSG00000067338	Tuba3b	M[a]7|Tuba7	tubulin, alpha 3B	protein-coding
upeaks-21496	chr18	53458200	53458619	+	0	NA	Intergenic	Intergenic	-6137	NM_001033281	225518	Mm.297645	NM_001033281	ENSMUSG00000069378	Prdm6	Gm92|PRISM	PR domain containing 6	protein-coding
upeaks-35565	chr5	130950958	130951157	+	0	NA	intron (NM_145218, intron 6 of 10)	intron (NM_145218, intron 6 of 10)	356465	NM_145218	212996	Mm.299204	NM_145218	ENSMUSG00000034040	Wbscr17	AA388321|E330012B09Rik	Williams-Beuren syndrome chromosome region 17 homolog (human)	protein-coding
upeaks-23809	chr2	14502483	14502854	+	0	NA	Intergenic	Intergenic	-101638	NM_023116	12296	Mm.313930	NM_023116	ENSMUSG00000057914	Cacnb2	AW060387|CAB2|Cavbeta2|Cchb2	calcium channel, voltage-dependent, beta 2 subunit	protein-coding
upeaks-14620	chr14	74553711	74554050	+	0	NA	Intergenic	LTR40a|LTR|ERVL	-86960	NM_172812	15558	Mm.214351	NM_172812	ENSMUSG00000034997	Htr2a	E030013E04|Htr-2|Htr2	5-hydroxytryptamine (serotonin) receptor 2A	protein-coding
upeaks-3338	chr10	8114858	8115277	+	0	NA	Intergenic	RLTR9D|LTR|ERVK	-158944	NM_138667	68652	Mm.193041	NM_138667	ENSMUSG00000015755	Tab2	1110030N06Rik|A530078N03Rik|Map3k7ip2|mKIAA0733	TGF-beta activated kinase 1/MAP3K7 binding protein 2	protein-coding
upeaks-682	chr1	57742294	57742595	+	0	NA	Intergenic	Intergenic	-32417	NM_144882	67198	Mm.159989	NM_144882	ENSMUSG00000038305	Spats2l	2810022L02Rik|A230104H11Rik|AA987173|AI480531|AI842453|AW413586	spermatogenesis associated, serine-rich 2-like	protein-coding
upeaks-27351	chr2	174312565	174312929	+	0	NA	intron (NM_001310085, intron 2 of 12)	(CCCCAG)n|Simple_repeat|Simple_repeat	14888	NM_001310085	14683	Mm.125770	NM_010309	ENSMUSG00000027523	Gnas	5530400H20Rik|A930027G11Rik|C130027O20Rik|GPSA|GSP|Galphas|Gnas1|Gnasxl|Gs-alpha|Gsa|Nesp|Nesp55|Nespl|Oed-Sml|Oedsml|P1|P2|P3|PHP1A|PHP1B|POH|SCG6	GNAS (guanine nucleotide binding protein, alpha stimulating) complex locus	protein-coding
upeaks-20380	chr17	79728895	79729145	+	0	NA	Intergenic	Intergenic	-13979	NM_009994	13078	Mm.214016	NM_009994	ENSMUSG00000024087	Cyp1b1	CP1B|P4501b1	cytochrome P450, family 1, subfamily b, polypeptide 1	protein-coding
upeaks-34010	chr5	45549090	45549430	+	0	NA	intron (NM_021416, intron 8 of 15)	RLTR13F|LTR|ERVK	29031	NM_025895	66999	Mm.283045	NM_025895	ENSMUSG00000015804	Med28	1500003D12Rik|AI451633|AU045690|Eg1|FKSG20|magicin	mediator complex subunit 28	protein-coding
upeaks-34808	chr5	104171958	104172171	+	0	NA	intron (NM_010080, intron 1 of 4)	Lx8b|LINE|L1	1361	NM_010080	666279	Mm.319832	NM_010080	ENSMUSG00000053268	Dspp	Dmp2|Dmp3|Dpp|Dsp	dentin sialophosphoprotein	protein-coding
upeaks-484	chr1	39695229	39695605	+	0	NA	intron (NM_001145660, intron 5 of 14)	intron (NM_001145660, intron 5 of 14)	25572	NM_001145660	619289	Mm.334107	NM_001145660	ENSMUSG00000057173	Rfx8	4933400N17Rik	regulatory factor X 8	protein-coding
upeaks-44310	chr8	125067637	125067988	+	0	NA	intron (NM_174853, intron 1 of 11)	intron (NM_174853, intron 1 of 11)	13617	NM_174854	244667	Mm.233504	NM_170596	ENSMUSG00000043051	Disc1	-	disrupted in schizophrenia 1	protein-coding
upeaks-39706	chr7	39596469	39596714	+	0	NA	Intergenic	Intergenic	78825	NM_001004139	70227	Mm.333800	NM_001004139	ENSMUSG00000068959	Zfp619	3000002G13Rik	zinc finger protein 619	protein-coding
upeaks-43111	chr8	79079941	79080600	+	0	NA	intron (NM_001294279, intron 4 of 14)	intron (NM_001294279, intron 4 of 14)	51833	NM_001294279	622675	Mm.48724	NM_178267	ENSMUSG00000071064	Zfp827	2810449M09Rik|D630040G17Rik|Znf827	zinc finger protein 827	protein-coding
upeaks-39729	chr7	43060912	43061211	+	0	NA	Intergenic	RLTR1D|LTR|ERV1	42263	NM_001105061	668612	Mm.469896	NM_001105061	ENSMUSG00000091528	Gm9268	EG668612|Vmn2r64	predicted gene 9268	protein-coding
upeaks-44809	chr9	29771942	29772149	+	0	NA	intron (NM_172290, intron 1 of 7)	intron (NM_172290, intron 1 of 7)	191084	NM_172290	235106	Mm.283138	NM_172290	ENSMUSG00000059974	Ntm	6230410L23Rik|B230210G24Rik|Hnt|Igdcc2|R75390	neurotrimin	protein-coding
upeaks-44082	chr8	120323222	120323421	+	0	NA	Intergenic	Intergenic	-95091	NR_110496	434353	Mm.411793	NR_110496	ENSMUSG00000097960	A330074K22Rik	-	RIKEN cDNA A330074K22 gene	ncRNA
upeaks-27970	chr3	38918980	38919216	+	0	NA	intron (NM_183221, intron 1 of 16)	intron (NM_183221, intron 1 of 16)	32158	NM_183221	329628	Mm.316210	NM_183221	ENSMUSG00000046743	Fat4	6030410K14Rik|9430004M15	FAT atypical cadherin 4	protein-coding
upeaks-46594	chr9	107890320	107890556	+	0	NA	intron (NM_028369, intron 1 of 5)	intron (NM_028369, intron 1 of 5)	2309	NM_028369	72825	Mm.38037	NM_028369	ENSMUSG00000032583	Mon1a	2810468K17Rik	MON1 homolog A, secretory traffciking associated	protein-coding
upeaks-1238	chr1	85724672	85724889	+	0	NA	intron (NM_177055, intron 3 of 5)	Lx8|LINE|L1	11826	NM_177055	319997	Mm.116691	NM_177055	ENSMUSG00000052760	A630001G21Rik	-	RIKEN cDNA A630001G21 gene	protein-coding
upeaks-44429	chr9	3027058	3027270	+	0	NA	Intergenic	GSAT_MM|Satellite|Satellite	11579	NR_039546	100628572		NR_039546	ENSMUSG00000106183	Mir101c	mir-101c|mmu-mir-101c	microRNA 101c	ncRNA
upeaks-8523	chr11	105950597	105950863	+	0	NA	Intergenic	Intergenic	-6583	NM_007805	13056	Mm.149403	NM_007805	ENSMUSG00000019590	Cyb561	-	cytochrome b-561	protein-coding
upeaks-29593	chr3	130252368	130252702	+	0	NA	intron (NM_029838, intron 2 of 37)	intron (NM_029838, intron 2 of 37)	71690	NM_029838	77018	Mm.91728	NM_029838	ENSMUSG00000058897	Col25a1	2700062B08Rik|CLAC-P	collagen, type XXV, alpha 1	protein-coding
upeaks-44040	chr8	119491365	119491596	+	0	NA	intron (NM_001009950, intron 6 of 10)	RMER20A|LTR|ERVK	10218	NM_001009950	234788	Mm.302096	NM_001009950	ENSMUSG00000034224	Slc38a8	Gm587	solute carrier family 38, member 8	protein-coding
upeaks-47323	chrX	37701985	37702339	+	0	NA	Intergenic	Intergenic	-28885	NM_001100465	622301	Mm.350896	NM_001100465	ENSMUSG00000079627	Rhox2h	OTTMUSG00000017156|Rhox2.8|Rhox2g	reproductive homeobox 2H	protein-coding
upeaks-39298	chr7	24325893	24326144	+	0	NA	Intergenic	RMER10B|LTR|ERVL	7947	NM_001163810	69301	Mm.144202	NM_027028	ENSMUSG00000055826	Tescl	1700008P20Rik	tescalcin-like	protein-coding
upeaks-21565	chr18	57271029	57271260	+	0	NA	intron (NM_001001979, intron 13 of 24)	intron (NM_001001979, intron 13 of 24)	-83589	NM_028447	73137	Mm.29889	NM_028447	ENSMUSG00000024594	Prrc1	1190002C06Rik|2310058D16Rik|3110038B19Rik|9430085A19Rik	proline-rich coiled-coil 1	protein-coding
upeaks-11879	chr13	44869493	44870114	+	0	NA	intron (NM_001205044, intron 4 of 18)	LSU-rRNA_Hsa|rRNA|rRNA	132293	NM_025772	94245	Mm.352311	NM_025772	ENSMUSG00000057531	Dtnbp1	5430437B18Rik|AW048963|Bloc1s8|dysbindin|sdy	dystrobrevin binding protein 1	protein-coding
upeaks-13069	chr13	109798750	109798959	+	0	NA	intron (NM_011056, intron 7 of 16)	intron (NM_011056, intron 7 of 16)	-104955	NR_035442	100316683		NR_035442	ENSMUSG00000084651	Mir1904	Mirn1904|mmu-mir-1904	microRNA 1904	ncRNA
upeaks-46253	chr9	94425790	94426332	+	0	NA	Intergenic	Intergenic	112020	NM_001033145	68861	Mm.258746	NM_001033145	ENSMUSG00000045414	1190002N15Rik	GoPro49|HASF	RIKEN cDNA 1190002N15 gene	protein-coding
upeaks-21638	chr18	61215834	61216244	+	0	NA	Intergenic	MTD|LTR|ERVL-MaLR	-4443	NM_007885	13521	Mm.24803	NM_007885	ENSMUSG00000034320	Slc26a2	Dtd|ST-OB	solute carrier family 26 (sulfate transporter), member 2	protein-coding
upeaks-13587	chr14	21891771	21892381	+	0	NA	Intergenic	Intergenic	-43166	NM_026965	69156	Mm.11827	NM_026965	ENSMUSG00000021773	Comtd1	1810030M08Rik|MT773	catechol-O-methyltransferase domain containing 1	protein-coding
upeaks-47171	chrX	8132011	8132983	+	0	NA	5' UTR (NM_026137, exon 1 of 9)	5' UTR (NM_026137, exon 1 of 9)	361	NM_001290783	73447	Mm.284162	NM_026137	ENSMUSG00000031166	Wdr13	1700060B08Rik|5730411P10Rik|DXHXS7467e|W51679|mMg21	WD repeat domain 13	protein-coding
upeaks-11275	chr13	16291737	16291958	+	0	NA	Intergenic	Intergenic	279996	NM_008380	16323	Mm.8042	NM_008380	ENSMUSG00000041324	Inhba	-	inhibin beta-A	protein-coding
upeaks-35371	chr5	123017634	123017866	+	0	NA	intron (NM_175423, intron 1 of 1)	intron (NM_175423, intron 1 of 1)	2676	NM_175423	109305	Mm.218582	NM_175423	ENSMUSG00000049686	Orai1	D730049H07Rik|Tmem142a|orai-1	ORAI calcium release-activated calcium modulator 1	protein-coding
upeaks-46254	chr9	94471349	94471830	+	0	NA	Intergenic	RLTR49|LTR|ERVK	66492	NM_001033145	68861	Mm.258746	NM_001033145	ENSMUSG00000045414	1190002N15Rik	GoPro49|HASF	RIKEN cDNA 1190002N15 gene	protein-coding
upeaks-21303	chr18	39057723	39058156	+	0	NA	intron (NM_175164, intron 1 of 22)	intron (NM_175164, intron 1 of 22)	64794	NM_175164	71302	Mm.329396	NM_175164	ENSMUSG00000036452	Arhgap26	1810044B20Rik|2610010G17Rik|4933432P15Rik|AI853435|mKIAA0621	Rho GTPase activating protein 26	protein-coding
upeaks-10122	chr12	76645339	76645711	+	0	NA	intron (NM_013675, intron 2 of 35)	intron (NM_013675, intron 2 of 35)	65022	NM_013675	20741	Mm.32881	NM_013675	ENSMUSG00000021061	Sptb	AI842465|D330027P03Rik|Gm1301|Spnb-1|Spnb1|ja|jaundiced|mKIAA4219	spectrin beta, erythrocytic	protein-coding
upeaks-36637	chr6	31024458	31024733	+	0	NA	Intergenic	RLTR18B|LTR|ERVK	38152	NR_029744	387222		NR_029744	ENSMUSG00000065610	Mir29a	Mirn29a|mir-29a|mmu-mir-29a	microRNA 29a	ncRNA
upeaks-43795	chr8	109750288	109750546	+	0	NA	Intergenic	Intergenic	-12678	NM_001080930	52335	Mm.276770	NM_001080930	ENSMUSG00000069895	Atxn1l	AW558552|Boat|C330011L24Rik|D6Mgi37|D8Ertd587e|ENSMUSG00000069895	ataxin 1-like	protein-coding
upeaks-31363	chr4	89177511	89177801	+	0	NA	intron (NM_024433, intron 7 of 7)	intron (NM_024433, intron 7 of 7)	40286	NM_024433	66902	Mm.28500	NM_024433	ENSMUSG00000062937	Mtap	1300019I21Rik|MSAP	methylthioadenosine phosphorylase	protein-coding
upeaks-11686	chr13	34961184	34961618	+	0	NA	intron (NM_026947, intron 1 of 8)	MER77|LTR|ERVL	2408	NM_026947	69123	Mm.482475	NM_026947	ENSMUSG00000021416	Eci3	1810022C23Rik|Kseg2	enoyl-Coenzyme A delta isomerase 3	protein-coding
upeaks-3308	chr10	6202927	6203159	+	0	NA	Intergenic	RLTR1D|LTR|ERV1	-280643	NM_019958	56533	Mm.44606	NM_019958	ENSMUSG00000019775	Rgs17	6430507P11Rik|Rgsz2	regulator of G-protein signaling 17	protein-coding
upeaks-736	chr1	59697697	59698050	+	0	NA	intron (NM_018868, intron 4 of 14)	RLTR9D|LTR|ERVK	5915	NR_028554	100217459		NR_028554		Snord70	MBII-234|snoRNA234	small nucleolar RNA, C/D box 70	snoRNA
upeaks-18464	chr16	90091264	90091476	+	0	NA	Intergenic	Intergenic	-50867	NR_033476	100038709	Mm.484070	NR_033476		Gm10789	ENSMUSG00000074924	predicted gene 10789	ncRNA
upeaks-38436	chr6	128650148	128650417	+	0	NA	Intergenic	Intergenic	-12103	NM_053165	94071	Mm.197689	NM_053165	ENSMUSG00000030364	Clec2h	Clrf|clr-f	C-type lectin domain family 2, member h	protein-coding
upeaks-11179	chr13	8840024	8840276	+	0	NA	intron (NM_001039388, intron 9 of 13)	intron (NM_001039388, intron 9 of 13)	30894	NM_172445	207615	Mm.284654	NM_172445	ENSMUSG00000021147	Wdr37	-	WD repeat domain 37	protein-coding
upeaks-16839	chr15	97377060	97377266	+	0	NA	intron (NM_172293, intron 5 of 5)	intron (NM_172293, intron 5 of 5)	-129876	NM_178114	105827	Mm.24005	NM_178114	ENSMUSG00000048218	Amigo2	AI415330|AMIGO-2|AW208913|Ali1	adhesion molecule with Ig like domain 2	protein-coding
upeaks-45363	chr9	55236637	55236845	+	0	NA	intron (NM_032002, intron 4 of 7)	intron (NM_032002, intron 4 of 7)	27806	NM_028049	71999	Mm.276429	NM_028049	ENSMUSG00000032309	Fbxo22	0610033L19Rik|1600016C16Rik	F-box protein 22	protein-coding
upeaks-23543	chr19	59522286	59522502	+	0	NA	intron (NR_045308, intron 2 of 4)	intron (NR_045308, intron 2 of 4)	29258	NR_045308	72647	Mm.410849	NR_045308	ENSMUSG00000100119	2700089I24Rik	-	RIKEN cDNA 2700089I24 gene	ncRNA
upeaks-13119	chr13	111803001	111803207	+	0	NA	intron (NM_011945, intron 1 of 19)	intron (NM_011945, intron 1 of 19)	5879	NM_011945	26401	Mm.15918	NM_011945	ENSMUSG00000021754	Map3k1	MAPKKK1|MEKK1|Mekk	mitogen-activated protein kinase kinase kinase 1	protein-coding
upeaks-22227	chr19	3832961	3833424	+	0	NA	Intergenic	Intergenic	-18581	NR_073190	12660	Mm.225505	NM_013490	ENSMUSG00000024843	Chka	CK|CK/EK-alpha|Chetk-alpha|Chk|ChoK|EK|EtnK-alpha	choline kinase alpha	protein-coding
upeaks-10848	chr12	110200539	110200751	+	0	NA	Intergenic	MLT1A0|LTR|ERVL-MaLR	-42572	NR_045466	67280	Mm.390495	NR_045466		3110009F21Rik	-	RIKEN cDNA 3110009F21 gene	ncRNA
upeaks-48032	chrX	160545985	160546184	+	0	NA	intron (NM_172783, intron 10 of 32)	RMER5|LTR|ERV1	43650	NM_001177878	110094	Mm.350712	NM_172783	ENSMUSG00000031295	Phka2	6330505C01Rik|D330034O08|Phk	phosphorylase kinase alpha 2	protein-coding
upeaks-2427	chr1	164533520	164533845	+	0	NA	Intergenic	RLTR1D|LTR|ERV1	-75327	NM_009721	11931	Mm.4550	NM_009721	ENSMUSG00000026576	Atp1b1	Atp4b|Atpb|Atpb-1|NKbeta1	ATPase, Na+/K+ transporting, beta 1 polypeptide	protein-coding
upeaks-20105	chr17	64935725	64936047	+	0	NA	Intergenic	RLTR49|LTR|ERVK	-99815	NM_030031	78057	Mm.109380	NM_030031	ENSMUSG00000024088	4930583I09Rik	-	RIKEN cDNA 4930583I09 gene	protein-coding
upeaks-14896	chr14	102402273	102402666	+	0	NA	Intergenic	Intergenic	561846	NM_001347628	380928	Mm.218981	NM_201529	ENSMUSG00000033060	Lmo7	C78582|FBXO20|Gm914|mKIAA0858	LIM domain only 7	protein-coding
upeaks-393	chr1	36075018	36075401	+	0	NA	intron (NM_015818, intron 1 of 1)	intron (NM_015818, intron 1 of 1)	6809	NM_015818	50785	Mm.213566	NM_015818	ENSMUSG00000045216	Hs6st1	6Ost1	heparan sulfate 6-O-sulfotransferase 1	protein-coding
upeaks-8688	chr11	111110434	111110720	+	0	NA	Intergenic	Intergenic	44413	NM_008425	16518	Mm.4951	NM_008425	ENSMUSG00000041695	Kcnj2	IRK1|Kcnf1|Kir2.1	potassium inwardly-rectifying channel, subfamily J, member 2	protein-coding
upeaks-39141	chr7	16420497	16420980	+	0	NA	intron (NM_198631, intron 4 of 13)	intron (NM_198631, intron 4 of 13)	19542	NM_198631	330474	Mm.333594	NM_198631	ENSMUSG00000059273	Zc3h4	Bwq1|Gm768|Kiaa1064-hp|mKIAA1064	zinc finger CCCH-type containing 4	protein-coding
upeaks-110	chr1	11018746	11018945	+	0	NA	intron (NM_029525, intron 1 of 39)	intron (NM_029525, intron 1 of 39)	25380	NM_029525	109294	Mm.123247	NM_029525	ENSMUSG00000048960	Prex2	6230420N16Rik|AI316880|AI553603|C030045D06Rik|D430013K02|Depdc2|P-Rex2	phosphatidylinositol-3,4,5-trisphosphate-dependent Rac exchange factor 2	protein-coding
upeaks-45784	chr9	67874921	67875171	+	0	NA	intron (NM_177184, intron 9 of 84)	intron (NM_177184, intron 9 of 84)	34650	NM_177184	320528	Mm.241454	NM_177184	ENSMUSG00000035284	Vps13c	AI552542|AV026040|C230055H22Rik|W51662|chorein	vacuolar protein sorting 13C	protein-coding
upeaks-9754	chr12	50634708	50634980	+	0	NA	intron (NM_008858, intron 1 of 18)	intron (NM_008858, intron 1 of 18)	14379	NM_008858	18760	Mm.133719	NM_008858	ENSMUSG00000002688	Prkd1	PKD|PKD1|Pkcm|Prkcm	protein kinase D1	protein-coding
upeaks-33236	chr4	154908594	154908819	+	0	NA	Intergenic	B1_Mm|SINE|Alu	-9663	NM_025582	66469	Mm.41868	NM_025582	ENSMUSG00000029059	Fam213b	2810405K02Rik|AI836168|PM/PGFS	family with sequence similarity 213, member B	protein-coding
upeaks-12340	chr13	64386035	64386645	+	0	NA	Intergenic	Intergenic	-15820	NM_009984	13039	Mm.930	NM_009984	ENSMUSG00000021477	Ctsl	1190035F06Rik|CatL|Ctsl1|MEP|fs|nkt	cathepsin L	protein-coding
upeaks-2360	chr1	162101531	162101850	+	0	NA	intron (NM_001038619, intron 15 of 20)	intron (NM_001038619, intron 15 of 20)	96721	NR_040562	72753	Mm.452125	NR_040562	ENSMUSG00000090260	2810442N19Rik	-	RIKEN cDNA 2810442N19 gene	ncRNA
upeaks-15418	chr15	13368880	13369151	+	0	NA	Intergenic	Intergenic	-195340	NM_007666	12563	Mm.57048	NM_007666	ENSMUSG00000039385	Cdh6	cad6	cadherin 6	protein-coding
upeaks-30745	chr4	45198303	45198716	+	0	NA	intron (NM_001081172, intron 1 of 15)	intron (NM_001081172, intron 1 of 15)	13603	NM_001081172	666060	Mm.24783	NM_001081172	ENSMUSG00000035615	Frmpd1	BC031840|mKIAA0967	FERM and PDZ domain containing 1	protein-coding
upeaks-24907	chr2	68934694	68935052	+	0	NA	intron (NM_172856, intron 2 of 9)	intron (NM_172856, intron 2 of 9)	73432	NM_172856	241447	Mm.222222	NM_172856	ENSMUSG00000027035	Cers6	4732462C07Rik|AW544719|Lass6|T1L	ceramide synthase 6	protein-coding
upeaks-11598	chr13	31197713	31197953	+	0	NA	Intergenic	Intergenic	43253	NR_045957	73924	Mm.417825	NR_045957	ENSMUSG00000087460	4930401O12Rik	-	RIKEN cDNA 4930401O12 gene	ncRNA
upeaks-17527	chr16	21405682	21405904	+	0	NA	Intergenic	Intergenic	-17325	NM_001285893	209018	Mm.235683	NM_145948	ENSMUSG00000033653	Vps8	AI315068|AU040738|mKIAA0804	VPS8 CORVET complex subunit	protein-coding
upeaks-20513	chr17	84136951	84137599	+	0	NA	Intergenic	Intergenic	50672	NM_001001806	12193	Mm.259321	NM_001001806	ENSMUSG00000045817	Zfp36l2	Brf2|ERF2|Tis11d	zinc finger protein 36, C3H type-like 2	protein-coding
upeaks-46069	chr9	83244110	83244395	+	0	NA	Intergenic	Intergenic	-97645	NM_026122	94353	Mm.244426	NM_026122	ENSMUSG00000066456	Hmgn3	1110002A15Rik|6330514M13Rik|BB071015|TRIP7	high mobility group nucleosomal binding domain 3	protein-coding
upeaks-13952	chr14	44094560	44094766	+	0	NA	Intergenic	Intergenic	-7991	NM_007895	13587	Mm.327386	NM_007895	ENSMUSG00000072596	Ear2	EAR-13|EAR-2|ECP|ECP 2|Raf3|Rnase2	eosinophil-associated, ribonuclease A family, member 2	protein-coding
upeaks-24381	chr2	33446877	33447093	+	0	NA	Intergenic	Intergenic	-15661	NM_001276332	241311	Mm.296512	NM_001085507	ENSMUSG00000068966	Zbtb34	Gm349|mKIAA1993	zinc finger and BTB domain containing 34	protein-coding
upeaks-47613	chrX	99027151	99027388	+	0	NA	Intergenic	MIRc|SINE|MIR	-15312	NM_199018	236920	Mm.236928	NM_199018	ENSMUSG00000031216	Stard8	Dlc3|mKIAA0189	START domain containing 8	protein-coding
upeaks-33876	chr5	36742057	36742492	+	0	NA	Intergenic	L2a|LINE|L2	6405	NM_133724	117197	Mm.46744	NM_133724	ENSMUSG00000060708	Bloc1s4	2610101N07Rik|Blos4|Cno	biogenesis of lysosomal organelles complex-1, subunit 4, cappuccino	protein-coding
upeaks-29947	chr3	145781022	145781463	+	0	NA	intron (NM_026993, intron 1 of 5)	intron (NM_026993, intron 1 of 5)	22550	NM_026993	69219	Mm.234247	NM_026993	ENSMUSG00000028194	Ddah1	2410006N07Rik|2510015N06Rik|AI987801|AW050362	dimethylarginine dimethylaminohydrolase 1	protein-coding
upeaks-11108	chr13	3805699	3805898	+	0	NA	Intergenic	Intergenic	-1480	NM_027416	70405	Mm.20079	NM_027416	ENSMUSG00000063130	Calml3	2310068O22Rik|AI326174	calmodulin-like 3	protein-coding
upeaks-18837	chr17	8352252	8352532	+	0	NA	Intergenic	MTC-int|LTR|ERVL-MaLR	11653	NM_178774	320111	Mm.442510	NM_178774	ENSMUSG00000055945	Prr18	9630019K15Rik	proline rich 18	protein-coding
upeaks-28360	chr3	69633874	69634169	+	0	NA	Intergenic	Intergenic	-35061	NM_020026	26879	Mm.153710	NM_020026	ENSMUSG00000043300	B3galnt1	B3galt3|b3GT3	UDP-GalNAc:betaGlcNAc beta 1,3-galactosaminyltransferase, polypeptide 1	protein-coding
upeaks-10641	chr12	102243969	102244266	+	0	NA	intron (NM_172152, intron 12 of 16)	MLT1A|LTR|ERVL-MaLR	-38957	NM_177620	217835	Mm.24145	NM_177620	ENSMUSG00000044456	Rin3	6430500K07|C86933	Ras and Rab interactor 3	protein-coding
upeaks-36978	chr6	50398427	50398626	+	0	NA	intron (NM_001347213, intron 2 of 23)	intron (NM_001347213, intron 2 of 23)	-15689	NM_027881	71720	Mm.44153	NM_027881	ENSMUSG00000029822	Osbpl3	1200014M06Rik|6720421I08Rik|A530055M08|ORP-3|ORP3|OSBP3	oxysterol binding protein-like 3	protein-coding
upeaks-20832	chr18	10958505	10958911	+	0	NA	Intergenic	Intergenic	-93802	NM_010258	14465	Mm.329287	NM_010258	ENSMUSG00000005836	Gata6	AA410133|GATA-6	GATA binding protein 6	protein-coding
upeaks-46698	chr9	110661216	110661609	+	0	NA	intron (NM_028312, intron 1 of 6)	MIRc|SINE|MIR	4909	NM_028312	72654	Mm.249115	NM_028312	ENSMUSG00000019659	Ccdc12	2700094L05Rik|C76605	coiled-coil domain containing 12	protein-coding
upeaks-40116	chr7	67846901	67847100	+	0	NA	Intergenic	Intergenic	-43504	NR_045954	73904	Mm.70992	NR_045954	ENSMUSG00000097697	4833412C05Rik	Bigheart	RIKEN cDNA 4833412C05 gene	ncRNA
upeaks-8321	chr11	101260318	101260714	+	0	NA	promoter-TSS (NM_175638)	promoter-TSS (NM_175638)	-51	NM_175638	69847	Mm.23656	NM_175638	ENSMUSG00000035112	Wnk4	2010002J11Rik|Pha2b|Prkwnk4	WNK lysine deficient protein kinase 4	protein-coding
upeaks-16509	chr15	83374026	83374423	+	0	NA	Intergenic	RMER16B2|LTR|ERVK	-6927	NR_027980	69291	Mm.66794	NM_001033147		1700001L05Rik	-	RIKEN cDNA 1700001L05 gene	ncRNA
upeaks-23956	chr2	22588480	22590112	+	0	NA	Intergenic	Intergenic	-33031	NM_008078	14417	Mm.4784	NM_008078	ENSMUSG00000026787	Gad2	6330404F12Rik|GAD(65)|GAD65|Gad-2	glutamic acid decarboxylase 2	protein-coding
upeaks-13516	chr14	19707897	19708198	+	0	NA	Intergenic	Intergenic	-43210	NM_008695	18074	Mm.20348	NM_008695	ENSMUSG00000021806	Nid2	AW547149|Ly111|NID-2|entactin-2|nidogen-2	nidogen 2	protein-coding
upeaks-17916	chr16	38898905	38899315	+	0	NA	Intergenic	Intergenic	-3235	NM_170599	207683	Mm.245564	NM_170599	ENSMUSG00000022790	Igsf11	1700025L02Rik|BT-IgSF|Igsf13	immunoglobulin superfamily, member 11	protein-coding
upeaks-37262	chr6	70814481	70814897	+	0	NA	Intergenic	RMER15|LTR|ERVL	-22514	NM_009075	19895	Mm.17905	NM_009075	ENSMUSG00000053604	Rpia	RPI	ribose 5-phosphate isomerase A	protein-coding
upeaks-46450	chr9	102924617	102925196	+	0	NA	Intergenic	Intergenic	-83583	NM_033314	24059	Mm.207106	NM_033314	ENSMUSG00000032548	Slco2a1	2310021C19Rik|Pgt|Slc21a2|mPgt	solute carrier organic anion transporter family, member 2a1	protein-coding
upeaks-22736	chr19	24529328	24529527	+	0	NA	intron (NM_008846, intron 1 of 14)	intron (NM_008846, intron 1 of 14)	26400	NM_008846	18719	Mm.217214	NM_008846	ENSMUSG00000024867	Pip5k1b	PI4P5K-I[b]|PIP5K1-beta|PIP5KIbeta|Pipk5b|STM7	phosphatidylinositol-4-phosphate 5-kinase, type 1 beta	protein-coding
upeaks-4827	chr10	84542792	84543184	+	0	NA	Intergenic	Intergenic	-9100	NM_175451	216197	Mm.334999	NM_175451	ENSMUSG00000046841	Ckap4	5630400A09Rik|CLIMP-63|P63	cytoskeleton-associated protein 4	protein-coding
upeaks-29946	chr3	145763681	145763885	+	0	NA	intron (NM_026993, intron 1 of 5)	Lx8|LINE|L1	5091	NM_026993	69219	Mm.234247	NM_026993	ENSMUSG00000028194	Ddah1	2410006N07Rik|2510015N06Rik|AI987801|AW050362	dimethylarginine dimethylaminohydrolase 1	protein-coding
upeaks-40734	chr7	101066086	101066323	+	0	NA	Intergenic	Intergenic	-42571	NM_001146010	207278	Mm.263041	NM_199012	ENSMUSG00000030691	Fchsd2	BC034086|R74866|Sh3md3|mKIAA0769	FCH and double SH3 domains 2	protein-coding
upeaks-4097	chr10	56884793	56885290	+	0	NA	Intergenic	LTR33|LTR|ERVL	507741	NM_010288	14609	Mm.378921	NM_010288	ENSMUSG00000050953	Gja1	AU042049|AW546267|Cnx43|Cx43|Cx43alpha1|Gja-1|Npm1|connexin43	gap junction protein, alpha 1	protein-coding
upeaks-13711	chr14	27310542	27310743	+	0	NA	intron (NM_001289686, intron 4 of 12)	intron (NM_001289686, intron 4 of 12)	-25395	NM_001289687	71704	Mm.248606	NM_027871	ENSMUSG00000021895	Arhgef3	1200004I24Rik|9830169H03Rik|C76747|Xpln	Rho guanine nucleotide exchange factor (GEF) 3	protein-coding
upeaks-12628	chr13	83655006	83655305	+	0	NA	intron (NM_001347564, intron 9 of 11)	intron (NM_001347564, intron 9 of 11)	-72951	NR_015561	320203	Mm.245636	NM_177100	ENSMUSG00000050334	C130071C03Rik	2810449C10Rik	RIKEN cDNA C130071C03 gene	ncRNA
upeaks-26967	chr2	164438324	164438580	+	0	NA	intron (NM_011521, intron 1 of 4)	intron (NM_011521, intron 1 of 4)	4736	NM_011521	20971	Mm.3815	NM_011521	ENSMUSG00000017009	Sdc4	AA959608|AW108331|S4|Synd4|ryudocan|syndecan-4	syndecan 4	protein-coding
upeaks-14277	chr14	58004069	58004401	+	0	NA	Intergenic	Intergenic	-4973	NM_028643	68514	Mm.26834	NM_028643	ENSMUSG00000021973	Micu2	1110008L20Rik|4833427E09Rik|AU041871|Efha1|Smhs2	mitochondrial calcium uptake 2	protein-coding
upeaks-6243	chr11	22476616	22476831	+	0	NA	Intergenic	RLTR5_Mm|LTR|ERV1	-35560	NM_153596	103765	Mm.221274	NM_153596	ENSMUSG00000049904	Tmem17	AI503894|AW049890	transmembrane protein 17	protein-coding
upeaks-19070	chr17	23579592	23579953	+	0	NA	intron (NM_011747, intron 5 of 5)	B1F1|SINE|Alu	-15546	NM_001033496	449521	Mm.268582	NM_001033496	ENSMUSG00000071256	Zfp213	BC038178|D17Ertd197e	zinc finger protein 213	protein-coding
upeaks-1819	chr1	132791102	132791344	+	0	NA	Intergenic	Intergenic	-49426	NM_001160317	269116	Mm.326702	NM_182716	ENSMUSG00000026442	Nfasc	AA387016|D430023G06Rik|NF|mKIAA0756	neurofascin	protein-coding
upeaks-9571	chr12	31603604	31603940	+	0	NA	intron (NM_007530, intron 5 of 6)	intron (NM_007530, intron 5 of 6)	30825	NM_007530	12033	Mm.242379	NM_007530	ENSMUSG00000020650	Bcap29	AW208404|Bap29	B cell receptor associated protein 29	protein-coding
upeaks-23595	chr2	3659398	3659843	+	0	NA	Intergenic	Intergenic	-53838	NM_025626	66540	Mm.277864	NM_025626	ENSMUSG00000026655	Fam107b	3110001A13Rik|AA589595|AA959793|AI132312	family with sequence similarity 107, member B	protein-coding
upeaks-5312	chr10	111215682	111215881	+	0	NA	intron (NM_001003717, intron 2 of 22)	intron (NM_001003717, intron 2 of 22)	50979	NM_001003717	237542	Mm.220204	NM_175489	ENSMUSG00000020189	Osbpl8	AA536976|AA536995|C730029P18Rik|D330025H14Rik|ORP-8	oxysterol binding protein-like 8	protein-coding
upeaks-10800	chr12	108403921	108404222	+	0	NA	intron (NM_001286346, intron 1 of 21)	intron (NM_001286346, intron 1 of 21)	-6562	NM_001043336	68519	Mm.236645	NM_001043335	ENSMUSG00000058070	Eml1	1110008N23Rik|A930030P13Rik|AA171013|AI847476|AI853955|ELP79|EMAP|EMAPL|heco	echinoderm microtubule associated protein like 1	protein-coding
upeaks-14096	chr14	51740810	51741057	+	0	NA	Intergenic	Intergenic	-23801	NM_001034102	545047	Mm.425915	NM_001034102	ENSMUSG00000068506	Gm5800	EG545047	predicted gene 5800	protein-coding
upeaks-7910	chr11	89515490	89515755	+	0	NA	intron (NM_001327810, intron 5 of 19)	intron (NM_001327810, intron 5 of 19)	-96674	NM_172534	382543	Mm.60997	NM_172534	ENSMUSG00000047773	Ankfn1	4932411E22Rik|Gm1175|nmf9	ankyrin-repeat and fibronectin type III domain containing 1	protein-coding
upeaks-38779	chr6	144299489	144299831	+	0	NA	Intergenic	Intergenic	-90092	NM_001243163	20678	Mm.1752	NM_011444	ENSMUSG00000041540	Sox5	A730017D01Rik|AI528773	SRY (sex determining region Y)-box 5	protein-coding
upeaks-18101	chr16	52134766	52135142	+	0	NA	intron (NM_001033238, intron 5 of 17)	intron (NM_001033238, intron 5 of 17)	103405	NM_001033238	208650	Mm.328206	NM_001033238	ENSMUSG00000022637	Cblb	AI429560|AI851073|Cbl-b	Casitas B-lineage lymphoma b	protein-coding
upeaks-21499	chr18	53472329	53472528	+	0	NA	intron (NM_001033281, intron 1 of 6)	intron (NM_001033281, intron 1 of 6)	7882	NM_001033281	225518	Mm.297645	NM_001033281	ENSMUSG00000069378	Prdm6	Gm92|PRISM	PR domain containing 6	protein-coding
upeaks-4876	chr10	86425715	86425914	+	0	NA	intron (NM_001164495, intron 3 of 6)	intron (NM_001164495, intron 3 of 6)	73082	NM_013722	27204	Mm.394931	NM_013722	ENSMUSG00000059602	Syn3	-	synapsin III	protein-coding
upeaks-24700	chr2	57496611	57497045	+	0	NA	Intergenic	MLT1J2|LTR|ERVL-MaLR	258446	NM_010274	14571	Mm.3711	NM_010274	ENSMUSG00000026827	Gpd2	AA408484|AI448216|AU021455|AW494132|GPDH|Gdm1|Gpd-m|Gpdh-m|TISP38	glycerol phosphate dehydrogenase 2, mitochondrial	protein-coding
upeaks-23520	chr19	58879588	58879906	+	0	NA	intron (NM_001327998, intron 2 of 12)	intron (NM_001327998, intron 2 of 12)	-18763	NM_175199	73442	Mm.39739	NM_175199	ENSMUSG00000025092	Hspa12a	1700063D12Rik|AI118035|AI840429|AW048913|AW556406|D5Mgi40|Gm19925|mKIAA0417	heat shock protein 12A	protein-coding
upeaks-258	chr1	21344438	21345137	+	0	NA	Intergenic	LTRIS2|LTR|ERV1	-4890	NM_183322	368204	Mm.26006	NM_183322	ENSMUSG00000067750	Khdc1a	AU014713|C88118|Ndg1	KH domain containing 1A	protein-coding
upeaks-40361	chr7	80866639	80867098	+	0	NA	intron (NM_009553, intron 2 of 2)	intron (NM_009553, intron 2 of 2)	4760	NM_009553	22691	Mm.358645	NM_009553	ENSMUSG00000038797	Zscan2	Zfp-29|Zfp29	zinc finger and SCAN domain containing 2	protein-coding
upeaks-24695	chr2	57188730	57188990	+	0	NA	TTS (NR_040633)	TTS (NR_040633)	7029	NR_040633	75279	Mm.401987	NR_040633	ENSMUSG00000086396	4930555B11Rik	-	RIKEN cDNA 4930555B11 gene	ncRNA
upeaks-21290	chr18	38779034	38779435	+	0	NA	Intergenic	Intergenic	-113222	NM_001033789	545253	Mm.244585	NM_001033789	ENSMUSG00000036452	Gm5820	EG545253	predicted gene 5820	protein-coding
upeaks-8923	chr11	116866040	116866438	+	0	NA	intron (NM_178620, intron 9 of 12)	intron (NM_178620, intron 9 of 12)	12224	NM_178620	69900	Mm.348004	NM_178620	ENSMUSG00000020818	Mfsd11	2600014M03Rik	major facilitator superfamily domain containing 11	protein-coding
upeaks-5288	chr10	110586174	110586390	+	0	NA	Intergenic	Intergenic	-14368	NR_028438	109335	Mm.367727	NR_028438		9230102K24Rik	-	RIKEN cDNA 9230102K24 gene	ncRNA
upeaks-2111	chr1	151962150	151962349	+	0	NA	intron (NM_197990, intron 3 of 5)	intron (NM_197990, intron 3 of 5)	128071	NM_197990	69399	Mm.278031	NM_197990	ENSMUSG00000032666	1700025G04Rik	2610510E02Rik|2900042O04Rik|ENSMUSG00000073540	RIKEN cDNA 1700025G04 gene	protein-coding
upeaks-20863	chr18	12196319	12196594	+	0	NA	intron (NM_008720, intron 20 of 24)	intron (NM_008720, intron 20 of 24)	27726	NM_029623	76482	Mm.196596	NM_029623	ENSMUSG00000024410	3110002H16Rik	2400010D15Rik|Mic-1|Mic1	RIKEN cDNA 3110002H16 gene	protein-coding
upeaks-20243	chr17	71483497	71483740	+	0	NA	Intergenic	Intergenic	-8275	NM_028887	74355	Mm.194450	NM_028887	ENSMUSG00000024054	Smchd1	4931400A14Rik|AW554188|MommeD1|mKIAA0650	SMC hinge domain containing 1	protein-coding
upeaks-6653	chr11	48908362	48908804	+	0	NA	intron (NM_001045540, intron 2 of 2)	intron (NM_001045540, intron 2 of 2)	-6431	NM_001024230	432555	Mm.338931	NM_001024230	ENSMUSG00000058163	Gm5431	EG432555|Irgb9b8	predicted gene 5431	protein-coding
upeaks-33510	chr5	21353564	21353813	+	0	NA	intron (NM_029195, intron 2 of 18)	intron (NM_029195, intron 2 of 18)	-18985	NM_008013	14190	Mm.292100	NM_008013	ENSMUSG00000039899	Fgl2	AI385601|musfiblp	fibrinogen-like protein 2	protein-coding
upeaks-12795	chr13	95836897	95837295	+	0	NA	intron (NM_027711, intron 2 of 35)	intron (NM_027711, intron 2 of 35)	54826	NM_027711	544963	Mm.38878	NM_027711	ENSMUSG00000021676	Iqgap2	4933417J23Rik|A630053O10|AI788777	IQ motif containing GTPase activating protein 2	protein-coding
upeaks-18140	chr16	57101274	57101505	+	0	NA	Intergenic	Intergenic	-20325	NM_138599	28185	Mm.196933	NM_138599	ENSMUSG00000022752	Tomm70a	2610044B22Rik|D16Ium22|D16Ium22e|D16Wsu109e|Tom70|Tomm70|mKIAA0719	translocase of outer mitochondrial membrane 70 homolog A (yeast)	protein-coding
upeaks-32796	chr4	141571479	141571739	+	0	NA	Intergenic	Intergenic	25447	NR_030695	320456	Mm.32859	NM_177163		B330016D10Rik	-	RIKEN cDNA B330016D10 gene	ncRNA
upeaks-8721	chr11	113117626	113117861	+	0	NA	intron (NR_015556, intron 1 of 2)	B1_Mur2|SINE|Alu	84095	NR_015556	72386	Mm.266961	NR_015556	ENSMUSG00000087259	2610035D17Rik	-	RIKEN cDNA 2610035D17 gene	ncRNA
upeaks-2967	chr1	185282790	185283163	+	0	NA	intron (NM_001163754, intron 33 of 34)	L2a|LINE|L2	-30343	NR_029580	387189		NR_029580	ENSMUSG00000065581	Mir194-1	Mirn194|Mirn194-1|miR-194|mir-194-1	microRNA 194-1	ncRNA
upeaks-36116	chr5	147623929	147624128	+	0	NA	intron (NM_010228, intron 14 of 29)	intron (NM_010228, intron 14 of 29)	101960	NM_010228	14254	Mm.389712	NM_010228	ENSMUSG00000029648	Flt1	AI323757|Flt-1|VEGFR-1|VEGFR1|sFlt1	FMS-like tyrosine kinase 1	protein-coding
upeaks-4736	chr10	81300322	81300614	+	0	NA	intron (NM_008844, intron 1 of 17)	intron (NM_008844, intron 1 of 17)	7505	NM_001293646	18717	Mm.24222	NM_008844	ENSMUSG00000034902	Pip5k1c	AI115456|AI835305|Pip5kIgamma	phosphatidylinositol-4-phosphate 5-kinase, type 1 gamma	protein-coding
upeaks-33608	chr5	25676267	25676728	+	0	NA	Intergenic	Intergenic	29300	NM_020570	57434	Mm.143767	NM_020570	ENSMUSG00000028933	Xrcc2	4921524O04Rik|8030409M04Rik|RAD51|RecA	X-ray repair complementing defective repair in Chinese hamster cells 2	protein-coding
upeaks-1528	chr1	106477716	106478278	+	0	NA	Intergenic	Intergenic	68634	NR_106164	102466254		NR_106164	ENSMUSG00000098344	Mir3473f	Gm27846|mmu-mir-3473f	microRNA 3473f	ncRNA
upeaks-34657	chr5	96804399	96804641	+	0	NA	intron (NM_013470, intron 2 of 12)	MER21C|LTR|ERVL	11135	NM_013470	11745	Mm.7214	NM_013470	ENSMUSG00000029484	Anxa3	Anx3	annexin A3	protein-coding
upeaks-10385	chr12	85452256	85452483	+	0	NA	Intergenic	Intergenic	-21532	NM_010234	14281	Mm.246513	NM_010234	ENSMUSG00000021250	Fos	D12Rfj1|c-fos|cFos	FBJ osteosarcoma oncogene	protein-coding
upeaks-34467	chr5	85795664	85795863	+	0	NA	Intergenic	Intergenic	269820	NM_001345902	12617	Mm.4649	NM_007683	ENSMUSG00000029253	Cenpc1	CENP-C|Cenpc	centromere protein C1	protein-coding
upeaks-34974	chr5	111113641	111114078	+	0	NA	intron (NM_001267622, intron 5 of 22)	intron (NM_001267622, intron 5 of 22)	109715	NR_030482	735278		NR_030482	ENSMUSG00000076163	Mir701	Mirn701|mir-701|mmu-mir-701	microRNA 701	ncRNA
upeaks-1522	chr1	106109586	106109793	+	0	NA	Intergenic	Intergenic	61835	NR_040630	626049	Mm.247410	NR_040630	ENSMUSG00000101583	Gm20753	-	predicted gene, 20753	ncRNA
upeaks-3724	chr10	30745243	30745476	+	0	NA	intron (NM_172495, intron 2 of 15)	intron (NM_172495, intron 2 of 15)	57748	NM_172495	211329	Mm.297903	NM_172495	ENSMUSG00000039697	Ncoa7	9030406N13Rik	nuclear receptor coactivator 7	protein-coding
upeaks-45953	chr9	77083241	77083471	+	0	NA	Intergenic	L1_Mus3|LINE|L1	-37575	NM_012033	26944	Mm.23199	NM_012033	ENSMUSG00000032357	Tinag	AI452335|TIN-ag	tubulointerstitial nephritis antigen	protein-coding
upeaks-3125	chr1	191480091	191480406	+	0	NA	Intergenic	Intergenic	-83207	NM_144880	226849	Mm.205569	NM_144880	ENSMUSG00000026626	Ppp2r5a	PR61alpha	protein phosphatase 2, regulatory subunit B', alpha	protein-coding
upeaks-1495	chr1	100232001	100232256	+	0	NA	intron (NM_172851, intron 11 of 23)	IAPEY4_LTR|LTR|ERVK	459363	NM_172851	241175	Mm.251301	NM_172851	ENSMUSG00000067028	Cntnap5b	C230078M14Rik|Caspr5-2	contactin associated protein-like 5B	protein-coding
upeaks-40168	chr7	70810496	70810695	+	0	NA	Intergenic	Intergenic	-443849	NM_183261	11819	Mm.158143	NM_009697	ENSMUSG00000030551	Nr2f2	2700033K02Rik|9430015G03Rik|ARP-1|Aporp1|COUP-TF2|COUP-TFII|COUPTFB|EAR3|SVP40|Tcfcoup2	nuclear receptor subfamily 2, group F, member 2	protein-coding
upeaks-22666	chr19	21161043	21161331	+	0	NA	Intergenic	Intergenic	56477	NR_126458	75354	Mm.243873	NR_126458		4930554I06Rik	-	RIKEN cDNA 4930554I06 gene	ncRNA
upeaks-5608	chr10	122343391	122343610	+	0	NA	Intergenic	Intergenic	-104999	NM_016847	54140	Mm.4351	NM_016847	ENSMUSG00000020123	Avpr1a	AVPR|Avpr1|V1a|V1aR	arginine vasopressin receptor 1A	protein-coding
upeaks-10167	chr12	78765259	78765475	+	0	NA	intron (NM_019579, intron 1 of 14)	MER21C|LTR|ERVL	16420	NM_019579	56217	Mm.425777	NM_019579	ENSMUSG00000021112	Mpp5	3830420B02Rik|AI255216|AI644496|Pals1	membrane protein, palmitoylated 5 (MAGUK p55 subfamily member 5)	protein-coding
upeaks-33576	chr5	24545380	24545598	+	0	NA	intron (NR_033188, intron 14 of 17)	intron (NR_033188, intron 14 of 17)	-4511	NM_001310476	117590	Mm.207071	NM_080444	ENSMUSG00000038204	Asb10	Asb-10|BB137407	ankyrin repeat and SOCS box-containing 10	protein-coding
upeaks-36039	chr5	144652231	144652626	+	0	NA	Intergenic	Intergenic	106541	NM_016789	53324	Mm.10099	NM_016789	ENSMUSG00000059991	Nptx2	Narp|np2	neuronal pentraxin 2	protein-coding
upeaks-12246	chr13	60226141	60226512	+	0	NA	Intergenic	Intergenic	20855	NR_036449	100503759	Mm.38101	NM_177810		Gm5084	A030007L22|EG328264	predicted gene 5084	ncRNA
upeaks-13449	chr14	16189204	16189555	+	0	NA	Intergenic	L2a|LINE|L2	-59935	NM_021504	59007	Mm.258381	NM_021504	ENSMUSG00000021785	Ngly1	1110002C09Rik|PNGase|Png1	N-glycanase 1	protein-coding
upeaks-4345	chr10	68345522	68345721	+	0	NA	Intergenic	Intergenic	-24479	NR_045357	75148	Mm.23505	NR_045357		4930545H06Rik	-	RIKEN cDNA 4930545H06 gene	ncRNA
upeaks-24541	chr2	44355341	44355648	+	0	NA	intron (NM_001301831, intron 13 of 14)	intron (NM_001301831, intron 13 of 14)	-290170	NR_040622	320872	Mm.445023	NR_040622	ENSMUSG00000085089	Arhgap15os	A430092G05Rik	Rho GTPase activating protein 15, opposite strand	ncRNA
upeaks-26280	chr2	139608917	139609306	+	0	NA	intron (NM_175467, intron 10 of 12)	intron (NM_175467, intron 10 of 12)	-69067	NM_001276489	319909	Mm.41113	NM_001126490	ENSMUSG00000074766	Ism1	5430433G21Rik|Ism	isthmin 1, angiogenesis inhibitor	protein-coding
upeaks-37797	chr6	98797898	98798097	+	0	NA	Intergenic	Intergenic	230301	NM_001197322	108655	Mm.234965	NM_053202	ENSMUSG00000030067	Foxp1	3110052D19Rik|4932443N09Rik|AI461938|AW494214	forkhead box P1	protein-coding
upeaks-2221	chr1	155422106	155422343	+	0	NA	Intergenic	Intergenic	-4780	NM_011273	19775	Mm.266215	NM_011273	ENSMUSG00000026469	Xpr1	Rmc-1|Rmc1|Sxv|Syg1|XR	xenotropic and polytropic retrovirus receptor 1	protein-coding
upeaks-23453	chr19	55846947	55847297	+	0	NA	intron (NR_138565, intron 4 of 15)	intron (NR_138565, intron 4 of 15)	-48199	NM_001142924	21416	Mm.139815	NM_009333	ENSMUSG00000024985	Tcf7l2	TCF4B|TCF4E|Tcf-4|Tcf4	transcription factor 7 like 2, T cell specific, HMG box	protein-coding
upeaks-13259	chr13	117413725	117413926	+	0	NA	Intergenic	Intergenic	-188495	NM_010408	15165	Mm.343429	NM_010408	ENSMUSG00000021730	Hcn1	Bcng1|C630013B14Rik|HAC2	hyperpolarization-activated, cyclic nucleotide-gated K+ 1	protein-coding
upeaks-46511	chr9	105675967	105676323	+	0	NA	intron (NM_001081309, intron 13 of 19)	intron (NM_001081309, intron 13 of 19)	33150	NM_001081309	75669	Mm.274830	NM_029380	ENSMUSG00000032571	Pik3r4	2210010O15Rik|C730038E05Rik|C85833|D9Ertd418e	phosphatidylinositol 3 kinase, regulatory subunit, polypeptide 4, p150	protein-coding
upeaks-23602	chr2	3958077	3958381	+	0	NA	Intergenic	ERVB7_2-LTR_MM|LTR|ERVK	-59454	NM_001347086	209630	Mm.37932	NM_172475	ENSMUSG00000026657	Frmd4a	2700017I06Rik|5330420J21|AI594879|C230040M21Rik|Frmd4|Gm13190|OTTMUSG00000010806|mKIAA1294	FERM domain containing 4A	protein-coding
upeaks-13919	chr14	40914827	40915137	+	0	NA	intron (NM_145928, intron 5 of 8)	intron (NM_145928, intron 5 of 8)	-22017	NM_177816	328381	Mm.235694	NM_177816	ENSMUSG00000037833	Sh2d4b	A430109M18Rik|D030001E08	SH2 domain containing 4B	protein-coding
upeaks-16802	chr15	96268076	96268325	+	0	NA	TTS (NR_030690)	TTS (NR_030690)	7075	NR_030690	319722	Mm.103823	NR_030690		E330033B04Rik	-	RIKEN cDNA E330033B04 gene	ncRNA
upeaks-18064	chr16	50095981	50096507	+	0	NA	Intergenic	Intergenic	-23392	NR_045935	224180	Mm.146439	NM_175010		Gm4827	B130050K08|EG224180	predicted gene 4827	ncRNA
upeaks-3400	chr10	12826877	12827184	+	0	NA	intron (NM_011682, intron 1 of 73)	intron (NM_011682, intron 1 of 73)	34705	NM_011682	22288	Mm.331784	NM_011682	ENSMUSG00000019820	Utrn	AA589569|DRP|Dmdl	utrophin	protein-coding
upeaks-24981	chr2	71801643	71801916	+	0	NA	intron (NM_001277970, intron 1 of 24)	intron (NM_001277970, intron 1 of 24)	14840	NM_001277970	16403	Mm.225096	NM_008397	ENSMUSG00000027111	Itga6	5033401O05Rik|AI115430|Cd49f|VLA-6	integrin alpha 6	protein-coding
upeaks-43905	chr8	113975550	113975777	+	0	NA	Intergenic	Intergenic	-126824	NM_172466	208936	Mm.167471	NM_172466	ENSMUSG00000053399	Adamts18	9630038L21|ADAMTS21|E130314N14Rik	a disintegrin-like and metallopeptidase (reprolysin type) with thrombospondin type 1 motif, 18	protein-coding
upeaks-34095	chr5	53074710	53074910	+	0	NA	Intergenic	Intergenic	25457	NM_011402	20531	Mm.284891	NM_011402	ENSMUSG00000029188	Slc34a2	AA536683|D5Ertd227e|NaPi-2b|Npt2b	solute carrier family 34 (sodium phosphate), member 2	protein-coding
upeaks-47751	chrX	111527566	111528020	+	0	NA	intron (NM_025949, intron 1 of 24)	intron (NM_025949, intron 1 of 24)	10166	NM_025949	67071	Mm.37617	NM_025949	ENSMUSG00000025665	Rps6ka6	2610524K04Rik|RSK4|S6K-alpha-6	ribosomal protein S6 kinase polypeptide 6	protein-coding
upeaks-30144	chr3	154046875	154047126	+	0	NA	intron (NM_001081263, intron 1 of 21)	intron (NM_001081263, intron 1 of 21)	73564	NM_001081263	242259	Mm.239962	NM_001081263	ENSMUSG00000028360	Slc44a5	AA117069|Gm422	solute carrier family 44, member 5	protein-coding
upeaks-13595	chr14	22090927	22091204	+	0	NA	intron (NM_028275, intron 2 of 6)	intron (NM_028275, intron 2 of 6)	71353	NM_028275	76633	Mm.489898	NM_028275	ENSMUSG00000063458	1700112E06Rik	2700009F18Rik	RIKEN cDNA 1700112E06 gene	protein-coding
upeaks-34166	chr5	63923691	63923919	+	0	NA	intron (NM_145923, intron 6 of 6)	intron (NM_145923, intron 6 of 6)	45092	NM_145923	100532	Mm.243632	NM_145923	ENSMUSG00000047881	Rell1	AA536743	RELT-like 1	protein-coding
upeaks-16066	chr15	71850297	71850662	+	0	NA	intron (NM_027174, intron 46 of 63)	intron (NM_027174, intron 46 of 63)	-122641	NM_177819	70363	Mm.126450	NM_177819	ENSMUSG00000036800	Fam135b	1700010C24Rik|A830008O07Rik	family with sequence similarity 135, member B	protein-coding
upeaks-30298	chr4	8200113	8200640	+	0	NA	intron (NM_007592, intron 3 of 8)	intron (NM_007592, intron 3 of 8)	38665	NM_007592	12319	Mm.119320	NM_007592	ENSMUSG00000041261	Car8	AW546993|Ca8|Cals|Cals1|Carp|wdl	carbonic anhydrase 8	protein-coding
upeaks-7408	chr11	74517765	74518173	+	0	NA	intron (NM_001015046, intron 2 of 24)	intron (NM_001015046, intron 2 of 24)	72189	NM_001015046	380711	Mm.425690	NM_001015046	ENSMUSG00000038807	Rap1gap2	AU067654|Garnl4|Gm1561|mKIAA1039	RAP1 GTPase activating protein 2	protein-coding
upeaks-16725	chr15	92087661	92088130	+	0	NA	intron (NM_001159648, intron 1 of 23)	intron (NM_001159648, intron 1 of 23)	36730	NM_001159648	12805	Mm.4911	NM_007727	ENSMUSG00000055022	Cntn1	AW495098|CNTN|F3cam|usl	contactin 1	protein-coding
upeaks-15795	chr15	52201811	52202027	+	0	NA	Intergenic	ORR1F|LTR|ERVL-MaLR	-93634	NM_172816	239436	Mm.208831	NM_172816	ENSMUSG00000022315	Slc30a8	C820002P14Rik|ZnT-8|ZnT8	solute carrier family 30 (zinc transporter), member 8	protein-coding
upeaks-13385	chr14	10189489	10189845	+	0	NA	intron (NM_001308286, intron 2 of 6)	intron (NM_001308286, intron 2 of 6)	263791	NM_001308286	14198	Mm.397619	NM_010210	ENSMUSG00000060579	Fhit	AW045638|Fra14A2	fragile histidine triad gene	protein-coding
upeaks-6896	chr11	58021687	58022070	+	0	NA	intron (NM_028451, intron 1 of 18)	intron (NM_028451, intron 1 of 18)	12814	NM_028451	73158	Mm.248843	NM_028451	ENSMUSG00000037331	Larp1	1810024J12Rik|3110040D16Rik|Larp|mKIAA0731	La ribonucleoprotein domain family, member 1	protein-coding
upeaks-37941	chr6	108773047	108773253	+	0	NA	Intergenic	Intergenic	-9909	NM_026011	67166	Mm.271178	NM_026011	ENSMUSG00000030105	Arl8b	2610313E07Rik|3100002J04Rik|Arl10c|gie1	ADP-ribosylation factor-like 8B	protein-coding
upeaks-18278	chr16	74717721	74717985	+	0	NA	Intergenic	Intergenic	-306941	NM_175549	268902	Mm.171736	NM_175549	ENSMUSG00000052516	Robo2	2600013A04Rik|9430089E08Rik|BB097918|D230004I22Rik|mKIAA1568	roundabout guidance receptor 2	protein-coding
upeaks-23508	chr19	58113202	58113529	+	0	NA	intron (NM_181415, intron 28 of 28)	intron (NM_181415, intron 28 of 28)	62198	NR_049196	100885835		NR_049196	ENSMUSG00000093757	Mir5623	Gm26068|mir-5623|mmu-mir-5623	microRNA 5623	ncRNA
upeaks-22821	chr19	29052852	29053132	+	0	NA	Intergenic	Lx8|LINE|L1	-5090	NM_021299	56248	Mm.196067	NM_021299	ENSMUSG00000024782	Ak3	AA407498|AI506714|AK-3|Ak3l|Ak3l1|Akl3l	adenylate kinase 3	protein-coding
upeaks-25373	chr2	93452594	93452827	+	0	NA	promoter-TSS (NM_001271462)	promoter-TSS (NM_001271462)	-38	NM_001271462	12521	Mm.4261	NM_007656	ENSMUSG00000027215	Cd82	AA682076|AL023070|C33|IA4|Kai1|Tspan27	CD82 antigen	protein-coding
upeaks-34433	chr5	77125398	77125597	+	0	NA	Intergenic	LTRIS2|LTR|ERV1	-10374	NM_175606	74318	Mm.181852	NM_175606	ENSMUSG00000059325	Hopx	1110018K11Rik|1200015P04Rik|2300002F06Rik|AI848177|AW490897|Cameo|Hdop|Hod|Hop|Ob1|Obl|Toto	HOP homeobox	protein-coding
upeaks-42347	chr8	29066221	29066535	+	0	NA	intron (NM_001347498, intron 1 of 14)	intron (NM_001347498, intron 1 of 14)	153258	NM_001347500	210801	Mm.248433	NM_153135	ENSMUSG00000063626	Unc5d	D930029E11Rik|Unc5h4|mKIAA1777	unc-5 netrin receptor D	protein-coding
upeaks-24251	chr2	30784480	30785076	+	0	NA	Intergenic	CpG	16959	NM_198000	73598	Mm.34166	NM_198000	ENSMUSG00000044320	1700001O22Rik	1700113K14Rik|4930549G18Rik	RIKEN cDNA 1700001O22 gene	protein-coding
upeaks-5208	chr10	105430268	105430669	+	0	NA	intron (NM_177368, intron 1 of 11)	intron (NM_177368, intron 1 of 11)	144011	NM_177368	278279	Mm.25225	NM_177368	ENSMUSG00000036019	Tmtc2	8430438D04Rik|D330034A10Rik	transmembrane and tetratricopeptide repeat containing 2	protein-coding
upeaks-33114	chr4	150880312	150880647	+	0	NA	Intergenic	RMER21B|LTR|ERV1	25388	NM_133753	74155	Mm.318841	NM_133753	ENSMUSG00000028967	Errfi1	1300002F13Rik|AI788755|Mig-6|Mig6|RALT	ERBB receptor feedback inhibitor 1	protein-coding
upeaks-9781	chr12	52446633	52446955	+	0	NA	Intergenic	Intergenic	33815	NR_136881	102638611	Mm.363799	NR_136881		Gm35135	-	predicted gene, 35135	ncRNA
upeaks-47389	chrX	53126126	53126382	+	0	NA	Intergenic	Intergenic	-11849	NM_019538	56096	Mm.274842	NM_019538	ENSMUSG00000061082	Plac1	DXWsu72e|Epcs26|Oosp2l	placental specific protein 1	protein-coding
upeaks-35284	chr5	120586456	120586996	+	0	NA	intron (NM_145853, intron 1 of 27)	intron (NM_145853, intron 1 of 27)	1887	NM_145853	252972	Mm.114054	NM_145853	ENSMUSG00000032741	Tpcn1	5730403B01Rik|Tpc1|mKIAA1169	two pore channel 1	protein-coding
upeaks-43797	chr8	109815211	109815775	+	0	NA	intron (NM_001301211, intron 2 of 22)	MTC-int|LTR|ERVL-MaLR	-23819	NR_028532	100217432		NR_028532		Snord71	MBII-239	small nucleolar RNA, C/D box 71	snoRNA
upeaks-45093	chr9	43757989	43758257	+	0	NA	intron (NM_021424, intron 1 of 5)	intron (NM_021424, intron 1 of 5)	13547	NM_021424	58235	Mm.335096	NM_021424	ENSMUSG00000032012	Nectin1	AI835281|AW549174|Cd111|HIgR|HveC|PRR|PRR1|Pvrl1|nectin-1	nectin cell adhesion molecule 1	protein-coding
upeaks-4128	chr10	58652704	58652903	+	0	NA	intron (NM_010100, intron 1 of 11)	intron (NM_010100, intron 1 of 11)	22893	NM_010100	13608	Mm.174523	NM_010100	ENSMUSG00000003227	Edar	ED1R|ED3|ED5|EDA-A1R|EDA3|dl	ectodysplasin-A receptor	protein-coding
upeaks-29512	chr3	127459121	127459343	+	0	NA	intron (NM_001327938, intron 1 of 47)	intron (NM_001327938, intron 1 of 47)	39883	NM_001327938	109676	Mm.220242	NM_178655	ENSMUSG00000032826	Ank2	100043364|AI835472|AW491075|Ank-2|Gm4392	ankyrin 2, brain	protein-coding
upeaks-40498	chr7	89554102	89554491	+	0	NA	Intergenic	Intergenic	-36710	NM_029614	76453	Mm.250438	NM_029614	ENSMUSG00000039405	Prss23	2310046G15Rik|4930479H08Rik|AI790574|Spuve	protease, serine 23	protein-coding
upeaks-29301	chr3	115793514	115793988	+	0	NA	Intergenic	Intergenic	-78696	NM_007901	13609	Mm.982	NM_007901	ENSMUSG00000045092	S1pr1	AI849002|Edg1|Lpb1|S1p|S1p1	sphingosine-1-phosphate receptor 1	protein-coding
upeaks-18577	chr16	93590949	93591332	+	0	NA	exon (NM_145482, exon 7 of 12)	exon (NM_145482, exon 7 of 12)	12675	NM_145482	224440	Mm.10628	NM_145482	ENSMUSG00000022948	Setd4	AY037804|C21orf18|ORF21	SET domain containing 4	protein-coding
upeaks-47594	chrX	95978179	95978379	+	0	NA	Intergenic	RLTR1D|LTR|ERV1	-21305	NM_152822	76130	Mm.274318	NM_152822	ENSMUSG00000057421	Las1l	1810030A06Rik|5830482G23Rik	LAS1-like (S. cerevisiae)	protein-coding
upeaks-42404	chr8	33913045	33913582	+	0	NA	intron (NM_001042674, intron 1 of 7)	MTD|LTR|ERVL-MaLR	16550	NM_001286168	19663	Mm.323997	NM_019733	ENSMUSG00000031586	Rbpms	2010300K22Rik|2700019M19Rik|AU017537|RBP-MS|hermes	RNA binding protein gene with multiple splicing	protein-coding
upeaks-14636	chr14	75197696	75198009	+	0	NA	intron (NM_008879, intron 2 of 16)	intron (NM_008879, intron 2 of 16)	-44435	NM_019775	56373	Mm.24242	NM_019775	ENSMUSG00000021999	Cpb2	1110032P04Rik|4930405E17Rik|AI255929|CPR|Cpu|TAFI	carboxypeptidase B2 (plasma)	protein-coding
upeaks-42770	chr8	61611645	61612145	+	0	NA	intron (NM_001293772, intron 10 of 21)	intron (NM_001293772, intron 10 of 21)	-20726	NM_001293774	72333	Mm.29933	NM_001081390	ENSMUSG00000058056	Palld	2410003B16Rik|6030492A02	palladin, cytoskeletal associated protein	protein-coding
upeaks-43421	chr8	91524333	91524683	+	0	NA	intron (NM_011936, intron 8 of 8)	intron (NM_011936, intron 8 of 8)	210983	NM_011936	26383	Mm.4375	NM_011936	ENSMUSG00000055932	Fto	AW743446|mKIAA1752	fat mass and obesity associated	protein-coding
upeaks-44745	chr9	24444090	24444289	+	0	NA	intron (NM_172920, intron 10 of 21)	L1MC1|LINE|L1	58951	NM_172920	244745	Mm.38526	NM_172920	ENSMUSG00000043067	Dpy19l1	1100001I19Rik|6030402K12|AI225861|AW558481	dpy-19-like 1 (C. elegans)	protein-coding
upeaks-44736	chr9	23566929	23567338	+	0	NA	Intergenic	Intergenic	344057	NM_028472	73230	Mm.335020	NM_028472	ENSMUSG00000031963	Bmper	3110056H04Rik|CV-2|Crim3|Cv2	BMP-binding endothelial regulator	protein-coding
upeaks-47031	chr9	121937927	121938147	+	0	NA	non-coding (NR_033553, exon 2 of 5)	non-coding (NR_033553, exon 2 of 5)	762	NR_033553	69430	Mm.482910	NR_033553	ENSMUSG00000043773	1700048O20Rik	1700022O21Rik	RIKEN cDNA 1700048O20 gene	ncRNA
upeaks-17685	chr16	30397236	30397727	+	0	NA	Intergenic	Intergenic	-8951	NM_001128096	224088	Mm.8924	NM_001128094	ENSMUSG00000022533	Atp13a3	AU022875|Gm1745|Gm541|Gm542	ATPase type 13A3	protein-coding
upeaks-35593	chr5	132372706	132373163	+	0	NA	intron (NM_177047, intron 1 of 18)	intron (NM_177047, intron 1 of 18)	169409	NM_177047	319974	Mm.409595	NM_177047	ENSMUSG00000029673	Auts2	2700063G02Rik|A730011F23Rik|D830032G16Rik	autism susceptibility candidate 2	protein-coding
upeaks-8778	chr11	114624299	114624594	+	0	NA	intron (NR_037269, intron 2 of 4)	intron (NR_037269, intron 2 of 4)	-44097	NM_001048057	67671	Mm.238817	NM_023372	ENSMUSG00000057322	Rpl38	0610025G13Rik|Rbt|Ts|Tss	ribosomal protein L38	protein-coding
upeaks-20598	chr17	87157089	87157304	+	0	NA	Intergenic	Lx8|LINE|L1	37746	NR_046016	399626	Mm.396062	NR_046016		C330024C12Rik	-	RIKEN cDNA C330024C12 gene	ncRNA
upeaks-19772	chr17	46483897	46484269	+	0	NA	intron (NM_001162864, intron 2 of 14)	intron (NM_001162864, intron 2 of 14)	3592	NM_001162864	106763	Mm.297613	NM_175351	ENSMUSG00000015599	Ttbk1	AU017937|AW048023|C330008L01Rik	tau tubulin kinase 1	protein-coding
upeaks-3691	chr10	28645518	28645890	+	0	NA	Intergenic	RMER10B|LTR|ERVL	-22656	NR_131208	210757	Mm.123021	NM_178666	ENSMUSG00000049109	Themis	E430004N04Rik|Gasp|Spot|Tsepa|thylex	thymocyte selection associated	protein-coding
upeaks-15557	chr15	32948104	32948539	+	0	NA	intron (NM_008304, intron 1 of 4)	intron (NM_008304, intron 1 of 4)	27598	NM_008304	15529	Mm.234266	NM_008304	ENSMUSG00000022261	Sdc2	4833414L08Rik|AA960457|Hspg1|Synd2|syndecan-2	syndecan 2	protein-coding
upeaks-15245	chr15	3281856	3282057	+	0	NA	intron (NM_001166063, intron 7 of 8)	intron (NM_001166063, intron 7 of 8)	10979	NM_009155	20363	Mm.392203	NM_009155	ENSMUSG00000064373	Selenop	AU018766|D15Ucla1|Se-P|Sepp1|selp	selenoprotein P	protein-coding
upeaks-21402	chr18	46666422	46666754	+	0	NA	Intergenic	Intergenic	61754	NM_033037	12583	Mm.241056	NM_033037	ENSMUSG00000033022	Cdo1	1300002L19Rik|Cdo|D18Ucla3	cysteine dioxygenase 1, cytosolic	protein-coding
upeaks-8588	chr11	107613877	107614228	+	0	NA	exon (NM_198298, exon 12 of 32)	exon (NM_198298, exon 12 of 32)	-23670	NR_105897	102465562		NR_105897	ENSMUSG00000098497	Mir6932	Gm27691|mmu-mir-6932	microRNA 6932	ncRNA
upeaks-40027	chr7	63824089	63824315	+	0	NA	Intergenic	LTR10_RN|LTR|ERVK	-92655	NM_001256311	381994	Mm.425466	NM_001256311	ENSMUSG00000095061	E030018B13Rik	Gm1697	RIKEN cDNA E030018B13 gene	protein-coding
upeaks-2184	chr1	153982898	153983349	+	0	NA	Intergenic	RLTR23|LTR|ERV1	83194	NM_008131	14645	Mm.210745	NM_008131	ENSMUSG00000026473	Glul	GS|Glns	glutamate-ammonia ligase (glutamine synthetase)	protein-coding
upeaks-33585	chr5	24667852	24668191	+	0	NA	Intergenic	MTE2a|LTR|ERVL-MaLR	-17794	NM_016736	53312	Mm.5856	NM_016736	ENSMUSG00000028954	Nub1	4931404D21Rik|6330412F12Rik|BS4|NY-REN-18	negative regulator of ubiquitin-like proteins 1	protein-coding
upeaks-38883	chr6	148404489	148404840	+	0	NA	intron (NM_001347518, intron 5 of 18)	intron (NM_001347518, intron 5 of 18)	39688	NM_001347518	387314	Mm.137858	NM_198967	ENSMUSG00000030306	Tmtc1	Arg99|BC023818	transmembrane and tetratricopeptide repeat containing 1	protein-coding
upeaks-28325	chr3	67952640	67952938	+	0	NA	intron (NM_001113419, intron 1 of 10)	intron (NM_001113419, intron 1 of 10)	60569	NM_001113419	100505386	Mm.331064	NM_001113419	ENSMUSG00000102422	Gm21949	Iqcj-schip1|Schip-1-iqcj|Schip1	predicted gene, 21949	protein-coding
upeaks-38784	chr6	144621478	144621703	+	0	NA	Intergenic	Intergenic	-51278	NR_040519	66760	Mm.233631	NR_040519	ENSMUSG00000085785	Sox5os3	4933425H06Rik	SRY (sex determining region Y)-box 5, opposite strand 3	ncRNA
upeaks-36457	chr6	17816936	17817299	+	0	NA	intron (NM_022332, intron 1 of 15)	intron (NM_022332, intron 1 of 15)	67947	NM_001083315	64213	Mm.12051	NM_022332	ENSMUSG00000029534	St7	9430001H04Rik|Fam4a2|HELG|RAY1|SEN4|TSG7	suppression of tumorigenicity 7	protein-coding
upeaks-34755	chr5	101968044	101968408	+	0	NA	intron (NM_172882, intron 5 of 66)	MTD|LTR|ERVL-MaLR	101695	NM_172882	72145	Mm.332522	NM_172882	ENSMUSG00000043940	Wdfy3	2610509D04Rik|ALFY|AW319683|B930017C24|BWF1|Bchs|D5Ertd66e|Ggtb3|ZFYVE25|mKIAA0993	WD repeat and FYVE domain containing 3	protein-coding
upeaks-11514	chr13	25254703	25254968	+	0	NA	intron (NM_009513, intron 3 of 3)	MTEa|LTR|ERVL-MaLR	15161	NM_009513	22360	Mm.4766	NM_009513	ENSMUSG00000048978	Nrsn1	Neurensin-1|Neuro-p24|Vmp	neurensin 1	protein-coding
upeaks-7992	chr11	94661373	94661686	+	0	NA	Intergenic	Intergenic	7738	NM_053161	94064	Mm.34951	NM_053161	ENSMUSG00000024414	Mrpl27	A630055F16Rik|D11Moh47|D18Ertd643e	mitochondrial ribosomal protein L27	protein-coding
upeaks-21925	chr18	74546530	74546859	+	0	NA	intron (NM_201600, intron 1 of 38)	intron (NM_201600, intron 1 of 38)	-15570	NR_045368	73606	Mm.444734	NR_045368		1700120E14Rik	-	RIKEN cDNA 1700120E14 gene	ncRNA
upeaks-40442	chr7	84165037	84165249	+	0	NA	Intergenic	RLTR14_RN|LTR|ERV1	-13250	NM_133722	70178	Mm.23914	NM_133722	ENSMUSG00000038459	Abhd17c	2210412D01Rik|AL023007|Fam108c|Fam108c1	abhydrolase domain containing 17C	protein-coding
upeaks-13366	chr14	8336000	8336237	+	0	NA	Intergenic	Intergenic	-26342	NM_183187	268709	Mm.256058	NM_183187	ENSMUSG00000021750	Fam107a	DRR1	family with sequence similarity 107, member A	protein-coding
upeaks-34757	chr5	102052920	102053324	+	0	NA	intron (NM_172882, intron 1 of 66)	intron (NM_172882, intron 1 of 66)	16799	NM_172882	72145	Mm.332522	NM_172882	ENSMUSG00000043940	Wdfy3	2610509D04Rik|ALFY|AW319683|B930017C24|BWF1|Bchs|D5Ertd66e|Ggtb3|ZFYVE25|mKIAA0993	WD repeat and FYVE domain containing 3	protein-coding
upeaks-43094	chr8	78054694	78054893	+	0	NA	Intergenic	Intergenic	-158549	NM_183096	73301	Mm.61243	NM_183096	ENSMUSG00000037101	Ttc29	1700031F13Rik	tetratricopeptide repeat domain 29	protein-coding
upeaks-31711	chr4	108144864	108145167	+	0	NA	Intergenic	MTD|LTR|ERVL-MaLR	-20422	NM_026728	52430	Mm.270783	NM_026728	ENSMUSG00000028601	Echdc2	1300017C12Rik|2610009M20Rik|D4Ertd765e	enoyl Coenzyme A hydratase domain containing 2	protein-coding
upeaks-35263	chr5	119963252	119963451	+	0	NA	Intergenic	Intergenic	128688	NM_011537	21388	Mm.103636	NM_011537	ENSMUSG00000018263	Tbx5	-	T-box 5	protein-coding
upeaks-95	chr1	10143918	10144380	+	0	NA	intron (NM_001102430, intron 34 of 37)	L2|LINE|L2	88521	NM_001102430	211673	Mm.229141	NM_001102430	ENSMUSG00000067851	Arfgef1	ARFGEP1|BIG1|D130059B05Rik|D730028O18Rik|P200	ADP-ribosylation factor guanine nucleotide-exchange factor 1(brefeldin A-inhibited)	protein-coding
upeaks-20421	chr17	80684206	80684523	+	0	NA	intron (NM_001290345, intron 1 of 33)	intron (NM_001290345, intron 1 of 33)	43661	NM_001290345	225028	Mm.311948	NM_001081357	ENSMUSG00000024242	Map4k3	4833416M01Rik|4833416M07Rik|9530052P13Rik|Glk|MAPKKKK3|MEKKK 3|MEKKK3|RAB8IPL1	mitogen-activated protein kinase kinase kinase kinase 3	protein-coding
upeaks-8703	chr11	112293525	112293729	+	0	NA	Intergenic	Intergenic	417729	NR_024085	217294	Mm.297761	NM_146031	ENSMUSG00000041674	BC006965	-	cDNA sequence BC006965	ncRNA
upeaks-12344	chr13	64437913	64438271	+	0	NA	intron (NM_053180, intron 7 of 7)	intron (NM_053180, intron 7 of 7)	5539	NM_053180	105278	Mm.74982	NM_053180	ENSMUSG00000021483	Cdk20	4932702G04Rik|AU019450|AW558027|CDCH|Ccrk|PNQLARE|p42	cyclin-dependent kinase 20	protein-coding
upeaks-34094	chr5	53059450	53059908	+	0	NA	intron (NM_011402, intron 4 of 12)	intron (NM_011402, intron 4 of 12)	10326	NM_011402	20531	Mm.284891	NM_011402	ENSMUSG00000029188	Slc34a2	AA536683|D5Ertd227e|NaPi-2b|Npt2b	solute carrier family 34 (sodium phosphate), member 2	protein-coding
upeaks-28591	chr3	87997376	87997575	+	0	NA	intron (NM_007529, intron 2 of 13)	intron (NM_007529, intron 2 of 13)	2881	NM_001109758	12032	Mm.4598	NM_007529	ENSMUSG00000004892	Bcan	Cspg7	brevican	protein-coding
upeaks-7421	chr11	74811181	74811485	+	0	NA	intron (NM_026197, intron 8 of 9)	RMER17D2|LTR|ERVK	-19591	NM_010813	17428	Mm.3759	NM_010813	ENSMUSG00000000282	Mnt	Rox|bHLHd3	max binding protein	protein-coding
upeaks-45278	chr9	50887386	50887706	+	0	NA	intron (NM_001286553, intron 15 of 16)	intron (NM_001286553, intron 15 of 16)	30622	NM_001286553	73699	Mm.7726	NM_028614	ENSMUSG00000032058	Ppp2r1b	2410091N08Rik|AI790395	protein phosphatase 2, regulatory subunit A, beta	protein-coding
upeaks-9250	chr12	8900863	8901062	+	0	NA	Intergenic	Intergenic	-20345	NM_008640	17775	Mm.30071	NM_008640	ENSMUSG00000020585	Laptm4a	AA286466|LAPTM4|MTP|Mtrp|mKIAA0108	lysosomal-associated protein transmembrane 4A	protein-coding
upeaks-6158	chr11	19350619	19350993	+	0	NA	Intergenic	Intergenic	285531	NR_046037	74059	Mm.292321	NR_046037	ENSMUSG00000086025	4933406G16Rik	-	RIKEN cDNA 4933406G16 gene	ncRNA
upeaks-19871	chr17	48458071	48458411	+	0	NA	intron (NM_152823, intron 1 of 8)	intron (NM_152823, intron 1 of 8)	3340	NM_152823	76589	Mm.311629	NM_152823	ENSMUSG00000043592	Unc5cl	2510009H09Rik|BB155270|Zud	unc-5 family C-terminal like	protein-coding
upeaks-18808	chr17	6728245	6728689	+	0	NA	intron (NM_183368, intron 4 of 8)	intron (NM_183368, intron 4 of 8)	22637	NM_183368	83672	Mm.442201	NM_031395	ENSMUSG00000041831	Sytl3	A430092N21|Slp3|Slp3-a|Slp3-b|mFLJ00307	synaptotagmin-like 3	protein-coding
upeaks-9056	chr11	120158952	120159210	+	0	NA	Intergenic	ORR1F|LTR|ERVL-MaLR	-7730	NM_001164801	72055	Mm.253403	NM_024249	ENSMUSG00000061306	Slc38a10	1810073N04Rik	solute carrier family 38, member 10	protein-coding
upeaks-42703	chr8	56883551	56883821	+	0	NA	Intergenic	Intergenic	332552	NM_015791	50753	Mm.251174	NM_015791	ENSMUSG00000038206	Fbxo8	Fbx8	F-box protein 8	protein-coding
upeaks-22072	chr18	80855015	80855390	+	0	NA	intron (NM_001201569, intron 8 of 29)	Lx7|LINE|L1	78856	NM_015805	50771	Mm.247138	NM_015805	ENSMUSG00000024566	Atp9b	AA934181|Atpc2b|IIb|MMR	ATPase, class II, type 9B	protein-coding
upeaks-20932	chr18	17530599	17530916	+	0	NA	Intergenic	ORR1E|LTR|ERVL-MaLR	50233	NR_045374	75162	Mm.60874	NR_045374		4930545E07Rik	-	RIKEN cDNA 4930545E07 gene	ncRNA
upeaks-25191	chr2	84465018	84465267	+	0	NA	intron (NM_001177320, intron 2 of 7)	intron (NM_001177320, intron 2 of 7)	9032	NM_011576	21788	Mm.124316	NM_011576	ENSMUSG00000027082	Tfpi	A630013F22Rik|AW552122|EPI|LACI	tissue factor pathway inhibitor	protein-coding
upeaks-25361	chr2	93261813	93262613	+	0	NA	intron (NM_183180, intron 2 of 9)	intron (NM_183180, intron 2 of 9)	72274	NM_183180	241556	Mm.274159	NM_183180	ENSMUSG00000027217	Tspan18	2610042G18Rik|6720430O15|BB226562	tetraspanin 18	protein-coding
upeaks-47924	chrX	144523291	144523560	+	0	NA	intron (NM_009428, intron 2 of 10)	intron (NM_009428, intron 2 of 10)	32814	NR_033647	100039436	Mm.483818	NM_001111315		Mageb16-ps1	EG623523|Gm15072|Mageb16|OTTMUSG00000018935	melanoma antigen family B, 16, pseudogene 1	pseudo
upeaks-22273	chr19	4719349	4719759	+	0	NA	intron (NM_021287, intron 2 of 36)	intron (NM_021287, intron 2 of 36)	8331	NM_021287	20743	Mm.329668	NM_021287	ENSMUSG00000067889	Sptbn2	Spnb3|mKIAA0302	spectrin beta, non-erythrocytic 2	protein-coding
upeaks-27213	chr2	170136998	170137233	+	0	NA	intron (NM_001159683, intron 1 of 6)	intron (NM_001159683, intron 1 of 6)	5560	NM_001159683	228913	Mm.22858	NM_001033299	ENSMUSG00000052056	Zfp217	4933431C08Rik|AW987152|Gm562|ZABC1|Znf217	zinc finger protein 217	protein-coding
upeaks-11581	chr13	30146544	30146933	+	0	NA	intron (NM_153546, intron 1 of 12)	intron (NM_153546, intron 1 of 12)	10248	NM_153546	218121	Mm.89682	NM_153546	ENSMUSG00000038732	Mboat1	9130215M02Rik|BC023845|LPEAT1|Moact1|Oact1	membrane bound O-acyltransferase domain containing 1	protein-coding
upeaks-31011	chr4	59814095	59814394	+	0	NA	intron (NM_172468, intron 1 of 8)	L2b|LINE|L2	8594	NM_172468	209131	Mm.259705	NM_172468	ENSMUSG00000028385	Snx30	4732481H14Rik|C030041J06Rik	sorting nexin family member 30	protein-coding
upeaks-24776	chr2	60636179	60636406	+	0	NA	intron (NM_021359, intron 7 of 14)	intron (NM_021359, intron 7 of 14)	37401	NM_021359	16420	Mm.98193	NM_021359	ENSMUSG00000026971	Itgb6	2210409C20Rik|4831415H04Rik	integrin beta 6	protein-coding
upeaks-46407	chr9	101045821	101046020	+	0	NA	Intergenic	LTR16B2|LTR|ERVL	-11036	NM_025835	66904	Mm.335385	NM_025835	ENSMUSG00000032527	Pccb	1300012P06Rik|AI314687|R74805	propionyl Coenzyme A carboxylase, beta polypeptide	protein-coding
upeaks-38510	chr6	134466738	134467110	+	0	NA	intron (NM_008514, intron 15 of 22)	intron (NM_008514, intron 15 of 22)	70595	NM_025778	66813	Mm.474472	NM_025778	ENSMUSG00000030200	Bcl2l14	4930452K23Rik|4933405K19Rik|9030625M01Rik|AI429211|Bclg	BCL2-like 14 (apoptosis facilitator)	protein-coding
upeaks-27314	chr2	173050653	173051042	+	0	NA	Intergenic	Intergenic	28945	NM_019547	56190	Mm.485782	NM_019547	ENSMUSG00000027510	Rbm38	Rnpc1|Seb4|Seb4l	RNA binding motif protein 38	protein-coding
upeaks-33998	chr5	44973553	44973778	+	0	NA	intron (NR_073013, intron 8 of 9)	MER21B|LTR|ERVL	7464	NR_073013	75783	Mm.218472	NR_073013	ENSMUSG00000062496	4930431F12Rik	-	RIKEN cDNA 4930431F12 gene	ncRNA
upeaks-25093	chr2	76498817	76499184	+	0	NA	promoter-TSS (NM_001290735)	promoter-TSS (NM_001290735)	-6	NM_001290735	99031	Mm.240435	NM_145525	ENSMUSG00000042359	Osbpl6	1110062M20Rik|AI596402|ORP-6|mKIAA4128	oxysterol binding protein-like 6	protein-coding
upeaks-16428	chr15	81167872	81168121	+	0	NA	intron (NM_001082536, intron 1 of 13)	RLTR20C1_MM|LTR|ERVK	22761	NM_001082536	223701	Mm.439814	NM_153049	ENSMUSG00000042292	Mkl1	AMKL|Bsac|Mal|Mrtf-A	MKL (megakaryoblastic leukemia)/myocardin-like 1	protein-coding
upeaks-34334	chr5	72896806	72897206	+	0	NA	Intergenic	Intergenic	-17356	NM_001113423	75991	Mm.121285	NM_153567	ENSMUSG00000036087	Slain2	5033405K12Rik|8030444K12Rik|AI596370	SLAIN motif family, member 2	protein-coding
upeaks-16585	chr15	85233237	85233716	+	0	NA	intron (NM_001347088, intron 8 of 14)	intron (NM_001347088, intron 8 of 14)	27468	NM_010180	14114	Mm.297992	NM_010180	ENSMUSG00000006369	Fbln1	-	fibulin 1	protein-coding
upeaks-8447	chr11	103379359	103379563	+	0	NA	intron (NM_183034, intron 6 of 11)	intron (NM_183034, intron 6 of 11)	-15769	NM_001205236	544817	Mm.259113	NM_133715	ENSMUSG00000034255	Arhgap27	2310069I04Rik|5730442P18Rik|Gm21552|Sh3d20	Rho GTPase activating protein 27	protein-coding
upeaks-39355	chr7	25477565	25477772	+	0	NA	promoter-TSS (NM_001039186)	promoter-TSS (NM_001039186)	-43	NM_001039186	26365	Mm.322502	NM_011926	ENSMUSG00000074272	Ceacam1	Bgp|Bgp1|C-CAM|CD66a|Cc1|Cea-1|Cea-7|Cea1|Cea7|Hv-2|Hv2|MHVR|MHVR1|Mhv-1|bb-1|mCEA1|mmCGM1|mmCGM1a|mmCGM2	carcinoembryonic antigen-related cell adhesion molecule 1	protein-coding
upeaks-15802	chr15	52967707	52968199	+	0	NA	Intergenic	Intergenic	255508	NM_027212	69790	Mm.195562	NM_027212	ENSMUSG00000038622	Med30	1810038N03Rik|2510044J04Rik|TRAP25|Thrap6	mediator complex subunit 30	protein-coding
upeaks-1132	chr1	81608715	81609299	+	0	NA	Intergenic	Intergenic	-522909	NR_105762	102466629		NR_105762	ENSMUSG00000098797	Mir6344	Gm27840|mmu-mir-6344	microRNA 6344	ncRNA
upeaks-13826	chr14	32889239	32889558	+	0	NA	intron (NM_178791, intron 3 of 7)	intron (NM_178791, intron 3 of 7)	32642	NM_178791	320736	Mm.187910	NM_178791	ENSMUSG00000050666	Vstm4	E130203B14Rik	V-set and transmembrane domain containing 4	protein-coding
upeaks-47852	chrX	138754157	138754571	+	0	NA	intron (NM_030688, intron 6 of 10)	Ricksha_c|DNA|MuDR	-160066	NM_013724	27206	Mm.482319	NM_013724	ENSMUSG00000052854	Nrk	AA407323|AA409510|AI225895|AV168563|AW538185|Nesk	Nik related kinase	protein-coding
upeaks-23455	chr19	55865648	55866104	+	0	NA	intron (NR_138565, intron 4 of 15)	intron (NR_138565, intron 4 of 15)	-29445	NM_001142924	21416	Mm.139815	NM_009333	ENSMUSG00000024985	Tcf7l2	TCF4B|TCF4E|Tcf-4|Tcf4	transcription factor 7 like 2, T cell specific, HMG box	protein-coding
upeaks-44483	chr9	7959360	7959564	+	0	NA	intron (NM_009534, intron 4 of 7)	intron (NM_009534, intron 4 of 7)	45134	NM_001171147	22601	Mm.221992	NM_009534	ENSMUSG00000053110	Yap1	AI325207|Yap|Yap65|Yki|Yorkie	yes-associated protein 1	protein-coding
upeaks-34544	chr5	90439099	90439531	+	0	NA	Intergenic	Intergenic	-21555	NM_009654	11657	Mm.16773	NM_009654	ENSMUSG00000029368	Alb	Alb-1|Alb1|BCL002	albumin	protein-coding
upeaks-37154	chr6	58630765	58631128	+	0	NA	intron (NM_011920, intron 1 of 15)	MLT1E3|LTR|ERVL-MaLR	34274	NM_011920	26357	Mm.333096	NM_011920	ENSMUSG00000029802	Abcg2	ABC15|ABCP|AI428558|BCRP|Bcrp1|MXR|MXR1	ATP-binding cassette, sub-family G (WHITE), member 2	protein-coding
upeaks-10295	chr12	82455783	82456310	+	0	NA	Intergenic	Intergenic	144697	NM_172579	217692	Mm.261333	NM_172579	ENSMUSG00000042700	Sipa1l1	4931426N11Rik|AW213287|Spar|mKIAA0440	signal-induced proliferation-associated 1 like 1	protein-coding
upeaks-1466	chr1	94263108	94263355	+	0	NA	Intergenic	Intergenic	-210678	NM_008798	18566	Mm.5024	NM_008798	ENSMUSG00000026285	Pdcd1	Ly101|PD-1|Pdc1	programmed cell death 1	protein-coding
upeaks-1752	chr1	130733852	130734052	+	0	NA	intron (NM_177604, intron 1 of 3)	intron (NM_177604, intron 1 of 3)	1976	NM_177604	212439	Mm.268547	NM_177604	ENSMUSG00000042510	AA986860	E030025M07|Sarg	expressed sequence AA986860	protein-coding
upeaks-29837	chr3	141733920	141734119	+	0	NA	intron (NM_001293561, intron 4 of 16)	intron (NM_001293561, intron 4 of 16)	197569	NM_001277220	12167	Mm.39089	NM_007560	ENSMUSG00000052430	Bmpr1b	AI385617|ALK-6|AV355320|Acvrlk6|Alk6|BMPR-1B|BMPR-IB|CFK-43a|SKR6	bone morphogenetic protein receptor, type 1B	protein-coding
upeaks-41235	chr7	123353997	123354213	+	0	NA	intron (NM_001122641, intron 1 of 18)	intron (NM_001122641, intron 1 of 18)	15810	NM_001122640	70497	Mm.403318	NM_144529	ENSMUSG00000030766	Arhgap17	5730403H17Rik|Nadrin|Nadrin2|Rich1|Wbp15	Rho GTPase activating protein 17	protein-coding
upeaks-37616	chr6	89412571	89412888	+	0	NA	intron (NM_025351, intron 6 of 7)	intron (NM_025351, intron 6 of 7)	-50116	NM_008881	18844	Mm.3789	NM_008881	ENSMUSG00000030084	Plxna1	2600013D04Rik|NOV|PlexA1|Plxn1|mKIAA4053	plexin A1	protein-coding
upeaks-21522	chr18	54970963	54971228	+	0	NA	intron (NM_175751, intron 2 of 9)	intron (NM_175751, intron 2 of 9)	19085	NM_175751	269023	Mm.192984	NM_175751	ENSMUSG00000052713	Zfp608	4932417D18Rik|D430007A19Rik|Znf608	zinc finger protein 608	protein-coding
upeaks-10785	chr12	108037375	108037874	+	0	NA	Intergenic	Intergenic	-34210	NM_001286343	58208	Mm.392694	NM_021399	ENSMUSG00000048251	Bcl11b	9130430L19Rik|AI604821|B630002E05Rik|BCL-11B|Ctip2|Rit1	B cell leukemia/lymphoma 11B	protein-coding
upeaks-44986	chr9	38530683	38531056	+	0	NA	Intergenic	MuRRS4-int|LTR|ERV1	-7013	NM_146811	258807	Mm.223234	NM_146811	ENSMUSG00000060114	Olfr910	MOR165-3	olfactory receptor 910	protein-coding
upeaks-44753	chr9	24848231	24848598	+	0	NA	Intergenic	Intergenic	-74111	NM_001205085	57246	Mm.31452	NM_020496	ENSMUSG00000031965	Tbx20	9430010M06Rik|AL022859|Tbx12	T-box 20	protein-coding
upeaks-30034	chr3	149216821	149217030	+	0	NA	Intergenic	Intergenic	-57812	NR_040591	381482	Mm.393866	NR_040591		Gm1653	-	predicted gene 1653	ncRNA
upeaks-19363	chr17	29817450	29817668	+	0	NA	Intergenic	Intergenic	70323	NM_001081160	74762	Mm.40901	NM_001081160	ENSMUSG00000043557	Mdga1	1200011I03Rik|GPIM|Mamdc3	MAM domain containing glycosylphosphatidylinositol anchor 1	protein-coding
upeaks-14951	chr14	105016195	105016558	+	0	NA	Intergenic	Intergenic	98300	NR_040628	100502987	Mm.124957	NR_040628		Gm17066	-	predicted gene 17066	ncRNA
upeaks-40582	chr7	96400529	96400728	+	0	NA	intron (NM_001310760, intron 2 of 32)	intron (NM_001310760, intron 2 of 32)	-58664	NR_046043	670727	Mm.421352	NR_046043	ENSMUSG00000085751	Gm15412	OTTMUSG00000021245	predicted gene 15412	ncRNA
upeaks-43488	chr8	94377629	94378002	+	0	NA	Intergenic	Intergenic	-8685	NM_022331	64209	Mm.29151	NM_022331	ENSMUSG00000031770	Herpud1	Herp|Mifl|SUP	homocysteine-inducible, endoplasmic reticulum stress-inducible, ubiquitin-like domain member 1	protein-coding
upeaks-2194	chr1	154107184	154107571	+	0	NA	Intergenic	Intergenic	-93810	NM_001204908	100503355	Mm.484410	NM_001204908	ENSMUSG00000066797	Zfp648	ENSMUSG00000066797|Gm10178|Gm203	zinc finger protein 648	protein-coding
upeaks-24448	chr2	35680311	35680627	+	0	NA	intron (NM_001290637, intron 3 of 16)	intron (NM_001290637, intron 3 of 16)	-11525	NM_001290640	69601	Mm.29629	NM_001001602	ENSMUSG00000026883	Dab2ip	2310011D08Rik|AI480459|Aip1|mKIAA1743	disabled 2 interacting protein	protein-coding
upeaks-308	chr1	24615860	24616059	+	0	NA	Intergenic	Intergenic	-28522	NM_007733	12823	Mm.329196	NM_007733	ENSMUSG00000026141	Col19a1	-	collagen, type XIX, alpha 1	protein-coding
upeaks-2792	chr1	179628810	179629032	+	0	NA	Intergenic	Intergenic	-39310	NM_178653	109232	Mm.136458	NM_178653	ENSMUSG00000038936	Sccpdh	AW214504|C330023F11Rik	saccharopine dehydrogenase (putative)	protein-coding
upeaks-2432	chr1	164712428	164712819	+	0	NA	Intergenic	RLTR49|LTR|ERVK	-84109	NM_019759	56429	Mm.28935	NM_019759	ENSMUSG00000026574	Dpt	1810032B19Rik|5033416F05Rik|EQ-1|Eq1	dermatopontin	protein-coding
upeaks-27495	chr2	181227242	181227441	+	0	NA	TTS (NM_183162)	TTS (NM_183162)	7325	NM_199312	332713	Mm.23349	NM_199312	ENSMUSG00000047841	BC051628	1700026M20Rik|Fndc11	cDNA sequence BC051628	protein-coding
upeaks-47479	chrX	73476573	73476945	+	0	NA	Intergenic	Intergenic	-6842	NM_007542	12111	Mm.2608	NM_007542	ENSMUSG00000031375	Bgn	BG|DSPG1|PG-S1|PGI|SLRR1A	biglycan	protein-coding
upeaks-37109	chr6	55341798	55342005	+	0	NA	intron (NM_007472, intron 1 of 3)	intron (NM_007472, intron 1 of 3)	5602	NM_007472	11826	Mm.18625	NM_007472	ENSMUSG00000004655	Aqp1	CHIP28	aquaporin 1	protein-coding
upeaks-29118	chr3	104796459	104796810	+	0	NA	intron (NM_001163441, intron 17 of 20)	intron (NM_001163441, intron 17 of 20)	7600	NM_007484	11853	Mm.262	NM_007484	ENSMUSG00000002233	Rhoc	AI324259|Arh9|Arhc	ras homolog family member C	protein-coding
upeaks-32853	chr4	143301933	143302448	+	0	NA	Intergenic	Intergenic	-2626	NM_010329	14726	Mm.2976	NM_010329	ENSMUSG00000028583	Pdpn	Gp38|OTS-8|RANDAM-2|T1-alpha|T1a|T1alpha	podoplanin	protein-coding
upeaks-25018	chr2	73660339	73660571	+	0	NA	promoter-TSS (NM_175752)	promoter-TSS (NM_175752)	-32	NM_175752	108699	Mm.257073	NM_029716	ENSMUSG00000056486	Chn1	0610007I19Rik|0710001E19Rik|1700112L09Rik|2900046J01Rik|AI413815|ARHGAP2	chimerin 1	protein-coding
upeaks-37422	chr6	83057848	83058123	+	0	NA	TTS (NR_125891)	TTS (NR_125891)	141	NM_033606	93838	Mm.140332	NM_033606	ENSMUSG00000009145	Dqx1	2310066E11Rik	DEAQ RNA-dependent ATPase	protein-coding
upeaks-24891	chr2	68301870	68302080	+	0	NA	intron (NM_016866, intron 14 of 17)	intron (NM_016866, intron 14 of 17)	170006	NM_016866	53416	Mm.198414	NM_016866	ENSMUSG00000027030	Stk39	AW227544|AW556857|DCHT|RF005|Rnl5|SPAK	serine/threonine kinase 39	protein-coding
upeaks-46391	chr9	100184092	100184395	+	0	NA	Intergenic	Intergenic	161943	NR_040763	108970	Mm.390215	NR_040763	ENSMUSG00000101584	4930519F24Rik	-	RIKEN cDNA 4930519F24 gene	ncRNA
upeaks-30338	chr4	10141520	10141960	+	0	NA	Intergenic	Intergenic	-224343	NR_004448	74662	Mm.483401	NR_004448	ENSMUSG00000082843	4930448K20Rik	1700009K09Rik	glyceraldehyde-3-phosphate dehydrogenase pseudogene	pseudo
upeaks-21312	chr18	39701312	39701609	+	0	NA	Intergenic	Intergenic	-72037	NM_011033	18459	Mm.9493	NM_011033	ENSMUSG00000051732	Pabpc2	Pabp|Pabp+|Pabp2	poly(A) binding protein, cytoplasmic 2	protein-coding
upeaks-41565	chr7	135609103	135609612	+	0	NA	intron (NM_001316679, intron 1 of 19)	intron (NM_001316679, intron 1 of 19)	3529	NM_001316679	19267	Mm.945	NM_011212	ENSMUSG00000041836	Ptpre	PTPe|PTPepsilon|RPTPepsilon	protein tyrosine phosphatase, receptor type, E	protein-coding
upeaks-13014	chr13	107207838	107208167	+	0	NA	Intergenic	Intergenic	185432	NR_015471	100040322	Mm.133867	NR_015471		3830408C21Rik	-	RIKEN cDNA 3830408C21 gene	ncRNA
upeaks-21320	chr18	41864727	41865088	+	0	NA	Intergenic	Intergenic	86287	NM_029942	77619	Mm.30649	NM_029942	ENSMUSG00000056671	Prelid2	1700003A01Rik|C330008K14Rik	PRELI domain containing 2	protein-coding
upeaks-41239	chr7	123394369	123394875	+	0	NA	intron (NM_025304, intron 1 of 10)	RLTR40|LTR|ERVK	16640	NM_025304	30949	Mm.260527	NM_025304	ENSMUSG00000030763	Lcmt1	AL033290|LCMT-1|Lcmt	leucine carboxyl methyltransferase 1	protein-coding
upeaks-32947	chr4	147782921	147783445	+	0	NA	intron (NM_001127189, intron 3 of 5)	RLTR13A1|LTR|ERVK	26605	NM_001127189	100041677	Mm.327194	NM_001127189	ENSMUSG00000078495	Zfp984	Gm13157|OTTMUSG00000010679	zinc finger protein 984	protein-coding
upeaks-2034	chr1	142434717	142434971	+	0	NA	Intergenic	Lx4A|LINE|L1	-1205853	NM_020025	26878	Mm.285580	NM_020025	ENSMUSG00000033849	B3galt2	-	UDP-Gal:betaGlcNAc beta 1,3-galactosyltransferase, polypeptide 2	protein-coding
upeaks-15664	chr15	38404584	38404931	+	0	NA	Intergenic	Intergenic	85790	NR_105916	102465574		NR_105916	ENSMUSG00000099110	Mir6951	Gm27765|mmu-mir-6951	microRNA 6951	ncRNA
upeaks-15676	chr15	38570157	38570365	+	0	NA	intron (NR_045757, intron 2 of 2)	B1F|SINE|Alu	24673	NR_045757	69679	Mm.416890	NR_045757	ENSMUSG00000102106	2310043O21Rik	-	RIKEN cDNA 2310043O21 gene	ncRNA
upeaks-47781	chrX	129739414	129739682	+	0	NA	Intergenic	Intergenic	-10194	NM_172493	54004	Mm.10763	NM_017398	ENSMUSG00000034480	Diaph2	Dia3|Diap2|Drf2|E430022I22Rik	diaphanous related formin 2	protein-coding
upeaks-16939	chr15	99403574	99403787	+	0	NA	intron (NM_001171035, intron 3 of 9)	intron (NM_001171035, intron 3 of 9)	10461	NM_001171035	110213	Mm.16769	NM_026669	ENSMUSG00000023010	Tmbim6	5031406P05Rik|Bi1|Tegt	transmembrane BAX inhibitor motif containing 6	protein-coding
upeaks-16979	chr15	100400639	100401018	+	0	NA	intron (NM_008732, intron 13 of 16)	intron (NM_008732, intron 13 of 16)	22227	NM_008732	18174	Mm.234608	NM_008732	ENSMUSG00000023030	Slc11a2	DCT1|DMT1|Nramp2|mk|van	solute carrier family 11 (proton-coupled divalent metal ion transporters), member 2	protein-coding
upeaks-19017	chr17	18955798	18956274	+	0	NA	Intergenic	RLTR1D|LTR|ERV1	41714	NM_001104549	627367	Mm.384131	NM_001104549	ENSMUSG00000091491	Vmn2r97	EG627367|Vn2r97	vomeronasal 2, receptor 97	protein-coding
upeaks-36341	chr6	6248494	6248797	+	0	NA	promoter-TSS (NR_136906)	promoter-TSS (NR_136906)	-14	NR_136905	101056138	Mm.389085	NR_136904	ENSMUSG00000093482	Gm20619	-	predicted gene 20619	ncRNA
upeaks-27140	chr2	168105309	168105665	+	0	NA	Intergenic	ID_B1|SINE|B4	24483	NM_021409	58220	Mm.292834	NM_021409	ENSMUSG00000044641	Pard6b	AV025615|Par6b	par-6 family cell polarity regulator beta	protein-coding
upeaks-34086	chr5	52975603	52976092	+	0	NA	intron (NR_040413, intron 2 of 2)	intron (NR_040413, intron 2 of 2)	16445	NR_040413	75954	Mm.258937	NR_040413	ENSMUSG00000106352	5033403H07Rik	-	RIKEN cDNA 5033403H07 gene	ncRNA
upeaks-9960	chr12	69783324	69783545	+	0	NA	intron (NM_183294, intron 2 of 9)	intron (NM_183294, intron 2 of 9)	-6910	NR_033573	74724	Mm.399254	NR_033573		4930512B01Rik	4930472D12Rik	RIKEN cDNA 4930512B01 gene	ncRNA
upeaks-30112	chr3	152998186	152998387	+	0	NA	Intergenic	Intergenic	-16079	NM_012028	26938	Mm.40915	NM_012028	ENSMUSG00000039037	St6galnac5	AI851940|Siat7e	ST6 (alpha-N-acetyl-neuraminyl-2,3-beta-galactosyl-1,3)-N-acetylgalactosaminide alpha-2,6-sialyltransferase 5	protein-coding
upeaks-7869	chr11	88404226	88404425	+	0	NA	intron (NM_054043, intron 8 of 13)	intron (NM_054043, intron 8 of 13)	51552	NR_039545	100628571		NR_039545	ENSMUSG00000092985	Mir378b	mir-378b|mmu-mir-378b	microRNA 378b	ncRNA
upeaks-41970	chr8	8890034	8890365	+	0	NA	Intergenic	Intergenic	-199662	NM_176849	234023	Mm.251655	NM_176849	ENSMUSG00000040459	Arglu1	9430010O03Rik|C130008N12	arginine and glutamate rich 1	protein-coding
upeaks-43588	chr8	102983240	102983492	+	0	NA	Intergenic	Intergenic	-198255	NM_009866	12552	Mm.1571	NM_009866	ENSMUSG00000031673	Cdh11	Cad11|OSF-4	cadherin 11	protein-coding
upeaks-2701	chr1	175317345	175317578	+	0	NA	intron (NM_001347195, intron 2 of 17)	Lx5b|LINE|L1	175084	NM_011880	24012	Mm.7956	NM_011880	ENSMUSG00000026527	Rgs7	-	regulator of G protein signaling 7	protein-coding
upeaks-12678	chr13	90039645	90039983	+	0	NA	intron (NM_028012, intron 3 of 7)	intron (NM_028012, intron 3 of 7)	49794	NM_028012	108138	Mm.37531	NM_028012	ENSMUSG00000021615	Xrcc4	2310057B22Rik|AW413319|AW545101	X-ray repair complementing defective repair in Chinese hamster cells 4	protein-coding
upeaks-17893	chr16	38135458	38135828	+	0	NA	intron (NM_001347232, intron 1 of 11)	L2b|LINE|L2	-46383	NR_033221	414072	Mm.483602	NR_033221		BC031361	-	cDNA sequence BC031361	ncRNA
upeaks-38526	chr6	134731002	134731292	+	0	NA	intron (NM_001048054, intron 4 of 6)	intron (NM_001048054, intron 4 of 6)	61481	NM_130447	70686	Mm.491182	NM_130447	ENSMUSG00000030203	Dusp16	3830417M17Rik|AW558566|D6Ertd213e|MKP-7|MKP7|Mkpm	dual specificity phosphatase 16	protein-coding
upeaks-6043	chr11	8797549	8797808	+	0	NA	Intergenic	Intergenic	-133143	NM_001083587	319939	Mm.337820	NM_001083587	ENSMUSG00000020422	Tns3	BC023928|F830010I22Rik|TEM6|Tens1	tensin 3	protein-coding
upeaks-43892	chr8	112674510	112674877	+	0	NA	intron (NM_130457, intron 3 of 23)	intron (NM_130457, intron 3 of 23)	104650	NM_130457	170571	Mm.209232	NM_130457	ENSMUSG00000031772	Cntnap4	Caspr4|E130114F09Rik	contactin associated protein-like 4	protein-coding
upeaks-38936	chr7	3210689	3210888	+	0	NA	Intergenic	MER31B|LTR|ERV1	-7838	NR_029640	100049710		NR_029640	ENSMUSG00000077815	Mir290a	Mir290|Mirn290|mir-290a|mmu-miR-290|mmu-mir-290a	microRNA 290a	ncRNA
upeaks-23789	chr2	13491756	13492155	+	0	NA	promoter-TSS (NM_001081084)	promoter-TSS (NM_001081084)	-79	NM_001081084	65969	Mm.313915	NM_001081084	ENSMUSG00000026726	Cubn	AA408369|AL022750|D2Wsu88e	cubilin (intrinsic factor-cobalamin receptor)	protein-coding
upeaks-387	chr1	35931084	35931400	+	0	NA	Intergenic	Intergenic	-137158	NM_015818	50785	Mm.213566	NM_015818	ENSMUSG00000045216	Hs6st1	6Ost1	heparan sulfate 6-O-sulfotransferase 1	protein-coding
upeaks-22308	chr19	5108715	5108997	+	0	NA	intron (NR_045528, intron 15 of 15)	intron (NR_045528, intron 15 of 15)	-1860	NM_029576	76308	Mm.182563	NM_029576	ENSMUSG00000024870	Rab1b	1110011F09Rik	RAB1B, member RAS oncogene family	protein-coding
upeaks-16842	chr15	97432257	97432742	+	0	NA	Intergenic	MER77B|LTR|ERVL	-185212	NM_178114	105827	Mm.24005	NM_178114	ENSMUSG00000048218	Amigo2	AI415330|AMIGO-2|AW208913|Ali1	adhesion molecule with Ig like domain 2	protein-coding
upeaks-21065	chr18	32138034	32138353	+	0	NA	promoter-TSS (NM_001042768)	promoter-TSS (NM_001042768)	12	NM_008934	19123	Mm.2786	NM_008934	ENSMUSG00000024386	Proc	PC	protein C	protein-coding
upeaks-10373	chr12	85201184	85201383	+	0	NA	Intergenic	Intergenic	-18198	NM_145445	217715	Mm.29041	NM_145445	ENSMUSG00000004788	Eif2b2	EIF-2Bbeta|EIF2B	eukaryotic translation initiation factor 2B, subunit 2 beta	protein-coding
upeaks-16440	chr15	81554944	81555262	+	0	NA	Intergenic	Intergenic	-31111	NM_177821	328572	Mm.258397	NM_177821	ENSMUSG00000055024	Ep300	A430090G16|A730011L11|KAT3B|p300|p300 HAT	E1A binding protein p300	protein-coding
upeaks-10069	chr12	73898428	73898648	+	0	NA	Intergenic	MIRb|SINE|MIR	-2786	NM_001313920	15251	Mm.3879	NM_010431	ENSMUSG00000021109	Hif1a	AA959795|HIF-1-alpha|HIF1-alpha|HIF1alpha|MOP1|bHLHe78	hypoxia inducible factor 1, alpha subunit	protein-coding
upeaks-2273	chr1	157454902	157455226	+	0	NA	Intergenic	Intergenic	-3518	NM_001033284	226527	Mm.215960	NM_001033284	ENSMUSG00000033488	BC026585	-	cDNA sequence BC026585	protein-coding
upeaks-37122	chr6	55880984	55881258	+	0	NA	intron (NM_001081665, intron 4 of 13)	intron (NM_001081665, intron 4 of 13)	44103	NM_001081665	232016	Mm.333084	NM_001081665	ENSMUSG00000037973	Ccdc129	D530004J12Rik|Gm458	coiled-coil domain containing 129	protein-coding
upeaks-33875	chr5	36739150	36739381	+	0	NA	Intergenic	Intergenic	9414	NM_133724	117197	Mm.46744	NM_133724	ENSMUSG00000060708	Bloc1s4	2610101N07Rik|Blos4|Cno	biogenesis of lysosomal organelles complex-1, subunit 4, cappuccino	protein-coding
upeaks-33489	chr5	20226608	20226825	+	0	NA	intron (NM_001170746, intron 5 of 22)	MTD|LTR|ERVL-MaLR	319198	NM_001170745	50791	Mm.332231	NM_015823	ENSMUSG00000040003	Magi2	AIP-1|Acvri1|Acvrinp1|Acvrip1|Magi-2|S-SCAM|mKIAA0705	membrane associated guanylate kinase, WW and PDZ domain containing 2	protein-coding
upeaks-15705	chr15	40279016	40279215	+	0	NA	Intergenic	Intergenic	144750	NM_001256056	328531	Mm.60703	NM_001256056	ENSMUSG00000094112	9330182O14Rik	-	RIKEN cDNA 9330182O14 gene	protein-coding
upeaks-25371	chr2	93412085	93412415	+	0	NA	intron (NR_040529, intron 3 of 5)	intron (NR_040529, intron 3 of 5)	8703	NR_040529	639658	Mm.66880	NR_040529	ENSMUSG00000085852	Gm13807	OTTMUSG00000014546	predicted gene 13807	ncRNA
upeaks-42811	chr8	66417674	66417908	+	0	NA	intron (NM_175188, intron 5 of 7)	RLTR13G|LTR|ERVK	31490	NM_001166375	72925	Mm.380457	NM_175188	ENSMUSG00000036469	2018-03-01	2900024D24Rik|BB085186	membrane-associated ring finger (C3HC4) 1	protein-coding
upeaks-2086	chr1	151144427	151144986	+	0	NA	TTS (NR_038011)	TTS (NR_038011)	6672	NR_038011	402734	Mm.337666	NR_038011		C730036E19Rik	lncLSTR	RIKEN cDNA C730036E19 gene	ncRNA
upeaks-42642	chr8	47652303	47652865	+	0	NA	Intergenic	Intergenic	22575	NM_023503	69260	Mm.430733	NM_023503	ENSMUSG00000063049	Ing2	2810011M06Rik|Ing1l|Ing2b|P33ING2	inhibitor of growth family, member 2	protein-coding
upeaks-7725	chr11	84603994	84604218	+	0	NA	Intergenic	Intergenic	78446	NR_038057	78365	Mm.260345	NR_038057	ENSMUSG00000087211	Lhx1os	1500016L03Rik|Lhx1as	LIM homeobox 1, opposite strand	ncRNA
upeaks-10237	chr12	80329764	80329974	+	0	NA	Intergenic	Intergenic	61808	NR_037207	100526530		NR_037207	ENSMUSG00000105972	Mir1843a	Mir1843|mir-1843a|mmu-mir-1843|mmu-mir-1843a	microRNA 1843a	ncRNA
upeaks-17628	chr16	28477806	28478144	+	0	NA	intron (NM_010199, intron 2 of 5)	RLTR1D2_MM|LTR|ERV1	-31900	NM_001276420	14167	Mm.7996	NM_010199	ENSMUSG00000022523	Fgf12	AV114868|B230343J05Rik|FGF-12|FHF-1|Fhf1	fibroblast growth factor 12	protein-coding
upeaks-21411	chr18	47172366	47172666	+	0	NA	Intergenic	Intergenic	196352	NM_018744	20358	Mm.40909	NM_018744	ENSMUSG00000019647	Sema6a	A730020P05Rik|AI851735|Sema6A-1|Semaq|VIa	sema domain, transmembrane domain (TM), and cytoplasmic domain, (semaphorin) 6A	protein-coding
upeaks-47806	chrX	135596783	135597006	+	0	NA	Intergenic	Intergenic	-3039	NM_130888	170722	Mm.103373	NM_130888	ENSMUSG00000031410	Nxf7	Nx7|Nxf6|nfx-a1|nxf-a|nxf-a2	nuclear RNA export factor 7	protein-coding
upeaks-3073	chr1	189973025	189973326	+	0	NA	Intergenic	Intergenic	-50887	NM_026796	226830	Mm.156895	NM_026796	ENSMUSG00000026603	Smyd2	1110020E07Rik|4930402C15|KMT3C|Zmynd14	SET and MYND domain containing 2	protein-coding
upeaks-4368	chr10	69584177	69584469	+	0	NA	intron (NM_170730, intron 1 of 17)	intron (NM_170730, intron 1 of 17)	50615	NM_170688	11735	Mm.235960	NM_009670	ENSMUSG00000069601	Ank3	2900054D09Rik|AI314020|Ank-3|AnkG|Ankyrin-3|Ankyrin-G	ankyrin 3, epithelial	protein-coding
upeaks-22880	chr19	31868594	31868840	+	0	NA	promoter-TSS (NM_001081074)	promoter-TSS (NM_001081074)	-44	NM_001081074	69865	Mm.87538	NM_001081074	ENSMUSG00000052595	A1cf	1810073H04Rik|ACF64|ACF65|ASP|Acf|MCM|MerCreMer|Tg(Myh6-cre/Esr1*)1Jmk|mer	APOBEC1 complementation factor	protein-coding
upeaks-35113	chr5	114922354	114922676	+	0	NA	promoter-TSS (NM_145209)	promoter-TSS (NM_145209)	-725	NM_145209	231655	Mm.95479	NM_145209	ENSMUSG00000041827	Oasl1	7530414C13Rik|oasl9	2'-5' oligoadenylate synthetase-like 1	protein-coding
upeaks-46833	chr9	115853260	115853470	+	0	NA	Intergenic	RMER4B|LTR|ERVK	-56090	NM_028638	73748	Mm.485018	NM_028638	ENSMUSG00000056880	Gadl1	1110027M19Rik|ADC|CSADC	glutamate decarboxylase-like 1	protein-coding
upeaks-24487	chr2	38052576	38052911	+	0	NA	intron (NM_146122, intron 5 of 21)	intron (NM_146122, intron 5 of 21)	234641	NM_146122	227801	Mm.314245	NM_146122	ENSMUSG00000035392	Dennd1a	6030446I19Rik|connecdenn	DENN/MADD domain containing 1A	protein-coding
upeaks-12316	chr13	63951921	63952271	+	0	NA	Intergenic	Intergenic	136762	NM_023507	76251	Mm.186610	NM_023507	ENSMUSG00000021470	Ercc6l2	0610007P08Rik|1700019D06Rik|9330134C04Rik|Rad26l|Sr278	excision repair cross-complementing rodent repair deficiency, complementation group 6 like 2	protein-coding
upeaks-47778	chrX	122831309	122831546	+	0	NA	Intergenic	(CATTC)n|Simple_repeat|Simple_repeat	-272096	NM_001310652	73061	Mm.292979	NM_028426	ENSMUSG00000079450	Cldn34c1	3110007F17Rik	claudin 34C1	protein-coding
upeaks-5900	chr11	4008661	4008959	+	0	NA	Intergenic	Intergenic	18877	NM_001177691	53897	Mm.103414	NM_016922	ENSMUSG00000049721	Gal3st1	Cst|Gcst	galactose-3-O-sulfotransferase 1	protein-coding
upeaks-28731	chr3	90537180	90537615	+	0	NA	Intergenic	Intergenic	-3826	NM_026416	67860	Mm.331185	NM_026416	ENSMUSG00000074457	S100a16	2300002L21Rik|AI325039|AI663996|DT1P1A7|S100F	S100 calcium binding protein A16	protein-coding
upeaks-24748	chr2	59683286	59683485	+	0	NA	intron (NM_198294, intron 2 of 26)	intron (NM_198294, intron 2 of 26)	36616	NM_001290659	66860	Mm.27917	NM_198294	ENSMUSG00000035168	Tanc1	1200003E16Rik|Tanc|mKIAA1728	tetratricopeptide repeat, ankyrin repeat and coiled-coil containing 1	protein-coding
upeaks-5321	chr10	111373365	111373564	+	0	NA	Intergenic	Intergenic	74785	NM_027914	71769	Mm.45256	NM_027914	ENSMUSG00000035759	Bbs10	1300007O09Rik|AI452285	Bardet-Biedl syndrome 10 (human)	protein-coding
upeaks-4395	chr10	70287763	70288046	+	0	NA	Intergenic	Intergenic	42628	NM_025807	66859	Mm.19325	NM_025807	ENSMUSG00000037762	Slc16a9	1200003C15Rik|4930425B13Rik|AI552636	solute carrier family 16 (monocarboxylic acid transporters), member 9	protein-coding
upeaks-31609	chr4	105305983	105306375	+	0	NA	Intergenic	Intergenic	148832	NM_080555	67916	Mm.348326	NM_080555	ENSMUSG00000028517	Plpp3	1110003O22Rik|2610002D05Rik|AV025606|D4Bwg0538e|D4Bwg1535e|Lpp3|Ppab2b|Ppap2b	phospholipid phosphatase 3	protein-coding
upeaks-31107	chr4	65218097	65218409	+	0	NA	intron (NM_021362, intron 7 of 21)	intron (NM_021362, intron 7 of 21)	94079	NM_021362	18491	Mm.317854	NM_021362	ENSMUSG00000028370	Pappa	8430414N03Rik|IGFBP-4ase|PAG1|PAPP-A	pregnancy-associated plasma protein A	protein-coding
upeaks-1180	chr1	84362729	84363090	+	0	NA	Intergenic	Intergenic	-78264	NM_001003948	98496	Mm.187470	NM_001003948	ENSMUSG00000045658	Pid1	5033414K04Rik|NYGGF4	phosphotyrosine interaction domain containing 1	protein-coding
upeaks-48084	chrX	164431344	164431794	+	0	NA	intron (NM_011081, intron 5 of 5)	intron (NM_011081, intron 5 of 5)	-5425	NM_026853	68854	Mm.33225	NM_026853	ENSMUSG00000031382	Asb11	1110067L12Rik|1600009D24Rik	ankyrin repeat and SOCS box-containing 11	protein-coding
upeaks-31521	chr4	100886153	100886855	+	0	NA	intron (NM_198037, intron 2 of 26)	intron (NM_198037, intron 2 of 26)	109825	NM_198037	320508	Mm.151962	NM_198037	ENSMUSG00000028532	Cachd1	1190007F10Rik|AI852726|B430218L07Rik|Vwcd1|mKIAA1573	cache domain containing 1	protein-coding
upeaks-4353	chr10	69100388	69100764	+	0	NA	Intergenic	RLTR1D|LTR|ERV1	-107976	NM_001252636	69288	Mm.26659	NM_001081347	ENSMUSG00000019944	Rhobtb1	1700008H16Rik|3110048G13Rik|AI173445|AI573858|AV350930	Rho-related BTB domain containing 1	protein-coding
upeaks-37287	chr6	71488050	71488263	+	0	NA	Intergenic	Intergenic	-5721	NM_001308303	22644	Mm.422969	NM_009543	ENSMUSG00000052656	Rnf103	AW146237|AW212918|Zfp103|kf-1	ring finger protein 103	protein-coding
upeaks-18039	chr16	48252595	48253142	+	0	NA	Intergenic	Intergenic	-30867	NM_001018002	73693	Mm.35597	NM_028610	ENSMUSG00000058550	Dppa4	2410091M23Rik|C76608|ECAT15-1	developmental pluripotency associated 4	protein-coding
upeaks-31091	chr4	63582696	63582913	+	0	NA	intron (NM_144905, intron 9 of 9)	intron (NM_144905, intron 9 of 9)	17960	NR_028584	670833	Mm.32213	NR_028583	ENSMUSG00000084782	Gm11213	OTTMUSG00000000252	predicted gene 11213	ncRNA
upeaks-41034	chr7	114771813	114772308	+	0	NA	intron (NM_173767, intron 2 of 12)	intron (NM_173767, intron 2 of 12)	26294	NM_173767	233752	Mm.83037	NM_173767	ENSMUSG00000048782	Insc	3830422K02Rik|C730020D23	inscuteable homolog (Drosophila)	protein-coding
upeaks-8351	chr11	101732570	101733176	+	0	NA	promoter-TSS (NM_144831)	promoter-TSS (NM_144831)	-83	NM_144831	217207	Mm.28186	NM_144831	ENSMUSG00000034931	Dhx8	Ddx8|mDEAH6|mKIAA4096	DEAH (Asp-Glu-Ala-His) box polypeptide 8	protein-coding
upeaks-3105	chr1	191154382	191154627	+	0	NA	Intergenic	Intergenic	10313	NM_001109759	619288	Mm.61148	NM_001109759	ENSMUSG00000091017	Fam71a	4933417M04Rik|GARI-L4	family with sequence similarity 71, member A	protein-coding
upeaks-29692	chr3	134243929	134244192	+	0	NA	intron (NM_001004367, intron 3 of 3)	intron (NM_001004367, intron 3 of 3)	-3477	NR_035435	100316832		NR_035435	ENSMUSG00000084564	Mir1895	Mirn1895|mmu-mir-1895	microRNA 1895	ncRNA
upeaks-9420	chr12	21264303	21264531	+	0	NA	intron (NM_001004364, intron 23 of 26)	intron (NM_001004364, intron 23 of 26)	21820	NM_008403	16413	Mm.273333	NM_008403	ENSMUSG00000062352	Itgb1bp1	AI449260|AU019480|Icap1	integrin beta 1 binding protein 1	protein-coding
upeaks-42889	chr8	69950385	69950747	+	0	NA	intron (NM_145596, intron 2 of 12)	intron (NM_145596, intron 2 of 12)	23817	NM_001113346	234366	Mm.270044	NM_145596	ENSMUSG00000036180	Gatad2a	1110066C11Rik|BC031407|C80248	GATA zinc finger domain containing 2A	protein-coding
upeaks-10204	chr12	79890897	79891300	+	0	NA	Intergenic	Intergenic	33635	NR_131075	77290	Mm.395042	NR_131073		9430078K24Rik	-	RIKEN cDNA 9430078K24 gene	ncRNA
upeaks-16832	chr15	97164003	97164362	+	0	NA	Intergenic	Intergenic	-82925	NM_172293	239647	Mm.130036	NM_172293	ENSMUSG00000044250	Pced1b	Fam113b	PC-esterase domain containing 1B	protein-coding
upeaks-46115	chr9	85770146	85770474	+	0	NA	Intergenic	Intergenic	-20976	NM_001081282	108837	Mm.22315	NM_175371	ENSMUSG00000035941	Ibtk	5430411K16Rik|AA409502|BTKI|mKIAA1417	inhibitor of Bruton agammaglobulinemia tyrosine kinase	protein-coding
upeaks-2412	chr1	164211015	164211215	+	0	NA	intron (NM_007976, intron 21 of 24)	L1MDa|LINE|L1	-37931	NM_054087	116914	Mm.35444	NM_054087	ENSMUSG00000040918	Slc19a2	AV276020|AW322295|DDA1|THTR1|TRMA	solute carrier family 19 (thiamine transporter), member 2	protein-coding
upeaks-35202	chr5	117951930	117952282	+	0	NA	intron (NM_008712, intron 26 of 27)	RLTR30D2_MM|LTR|ERV1	-24664	NM_001346588	231670	Mm.21912	NM_145564	ENSMUSG00000032898	Fbxo21	2810425J22Rik|AU016673	F-box protein 21	protein-coding
upeaks-30957	chr4	57377770	57378233	+	0	NA	Intergenic	Intergenic	-13709	NR_038179	73349	Mm.393774	NR_038178		1700042G15Rik	-	RIKEN cDNA 1700042G15 gene	ncRNA
upeaks-42202	chr8	22513750	22513956	+	0	NA	intron (NM_011394, intron 1 of 10)	Lx7|LINE|L1	-36974	NM_001012667	102032	Mm.378231	NM_001012667	ENSMUSG00000031534	Smim19	AI316807|BG694986|EST-c39	small integral membrane protein 19	protein-coding
upeaks-17668	chr16	30053134	30053537	+	0	NA	Intergenic	Intergenic	-12022	NM_008235	15205	Mm.390859	NM_008235	ENSMUSG00000022528	Hes1	Hry|bHLHb39	hairy and enhancer of split 1 (Drosophila)	protein-coding
upeaks-19658	chr17	41451353	41451694	+	0	NA	Intergenic	Intergenic	516838	NM_008650	17850	Mm.259884	NM_008650	ENSMUSG00000023921	Mut	D230010K02Rik|Mcm	methylmalonyl-Coenzyme A mutase	protein-coding
upeaks-1029	chr1	75204649	75204907	+	0	NA	intron (NM_029010, intron 5 of 16)	intron (NM_029010, intron 5 of 16)	6000	NM_029010	74577	Mm.458319	NM_029010	ENSMUSG00000026200	Glb1l	4833408P15Rik	galactosidase, beta 1-like	protein-coding
upeaks-35117	chr5	114969153	114969402	+	0	NA	intron (NM_009327, intron 1 of 9)	intron (NM_009327, intron 1 of 9)	1785	NM_009327	21405	Mm.332607	NM_009327	ENSMUSG00000029556	Hnf1a	AI323641|HNF1|HNF1-alpha|HNF1[a]|Hnf-1|Hnf1alpha|LFB1|Tcf-1|Tcf1	HNF1 homeobox A	protein-coding
upeaks-42796	chr8	64337426	64337730	+	0	NA	Intergenic	Intergenic	-131585	NM_009390	21892	Mm.418367	NM_009390	ENSMUSG00000053626	Tll1	Tll|Tll-1	tolloid-like	protein-coding
upeaks-30073	chr3	152133629	152134004	+	0	NA	intron (NM_016867, intron 2 of 5)	intron (NM_016867, intron 2 of 5)	32084	NM_016867	54120	Mm.97	NM_016867	ENSMUSG00000039131	Gipc2	2200002N01Rik|AU021850|Semcap2	GIPC PDZ domain containing family, member 2	protein-coding
upeaks-12881	chr13	99331801	99332040	+	0	NA	intron (NM_026873, intron 6 of 9)	intron (NM_026873, intron 6 of 9)	12758	NM_026873	68927	Mm.276502	NM_026873	ENSMUSG00000021650	Ptcd2	1190005P08Rik	pentatricopeptide repeat domain 2	protein-coding
upeaks-4971	chr10	91448180	91448379	+	0	NA	Intergenic	Intergenic	-276660	NM_001080131	21917	Mm.159684	NM_011605	ENSMUSG00000019961	Tmpo	5630400D24Rik|AI195756|AI606875|AW214352|AW547477|LAP2|TP	thymopoietin	protein-coding
upeaks-38335	chr6	125363901	125364212	+	0	NA	intron (NM_198604, intron 15 of 16)	intron (NM_198604, intron 15 of 16)	14333	NM_011609	21937	Mm.1258	NM_011609	ENSMUSG00000030341	Tnfrsf1a	CD120a|FPF|TNF-R|TNF-R-I|TNF-R1|TNF-R55|TNF-alphaR1|TNFAR|TNFR60|TNFRI|TNFRp55|TNFalpha-R1|Tnfr-2|Tnfr1|p55|p55-R	tumor necrosis factor receptor superfamily, member 1a	protein-coding
upeaks-46111	chr9	85589767	85590241	+	0	NA	Intergenic	Intergenic	159330	NM_001081282	108837	Mm.22315	NM_175371	ENSMUSG00000035941	Ibtk	5430411K16Rik|AA409502|BTKI|mKIAA1417	inhibitor of Bruton agammaglobulinemia tyrosine kinase	protein-coding
upeaks-30549	chr4	32521913	32522169	+	0	NA	intron (NM_001109661, intron 2 of 4)	intron (NM_001109661, intron 2 of 4)	49621	NR_026843	414068	Mm.389550	NR_026843	ENSMUSG00000086150	Bach2os	-	BTB and CNC homology 2, opposite strand	ncRNA
upeaks-27791	chr3	28854252	28854451	+	0	NA	Intergenic	MuRRS4-int|LTR|ERV1	-38266	NM_001033479	385263	Mm.60893	NM_001033479	ENSMUSG00000074655	Gm1527	Gm1136	predicted gene 1527	protein-coding
upeaks-45525	chr9	61261233	61261432	+	0	NA	non-coding (NR_045334, exon 5 of 5)	non-coding (NR_045334, exon 5 of 5)	32477	NR_045334	622037	Mm.126243	NR_045334	ENSMUSG00000111658	B930092H01Rik	-	RIKEN cDNA B930092H01 gene	ncRNA
upeaks-14793	chr14	93163832	93164152	+	0	NA	intron (NM_001346722, intron 4 of 4)	intron (NM_001346722, intron 4 of 4)	724896	NM_001081377	211712	Mm.37126	NM_001081377	ENSMUSG00000055421	Pcdh9	-	protocadherin 9	protein-coding
upeaks-38358	chr6	126404703	126404993	+	0	NA	Intergenic	Intergenic	-76162	NR_045480	100038574	Mm.399353	NR_045480	ENSMUSG00000107623	Gm10415	ENSMUSG00000072759	predicted gene 10415	ncRNA
upeaks-18501	chr16	90996849	90997111	+	0	NA	intron (NM_001164483, intron 2 of 31)	L1MC4|LINE|L1	14115	NM_001045515	104015	Mm.187079	NM_001045515	ENSMUSG00000022973	Synj1	A930006D20Rik|AA675315|mKIAA0910	synaptojanin 1	protein-coding
upeaks-39644	chr7	35448089	35448402	+	0	NA	promoter-TSS (NM_001199016)	promoter-TSS (NM_001199016)	-847	NM_001199015	30962	Mm.45874	NM_021291	ENSMUSG00000030492	Slc7a9	CSNU3	solute carrier family 7 (cationic amino acid transporter, y+ system), member 9	protein-coding
upeaks-5298	chr10	110855674	110855951	+	0	NA	intron (NR_045979, intron 2 of 2)	RLTR13E|LTR|ERVK	40695	NR_045979	75630	Mm.392786	NR_045979	ENSMUSG00000101801	1700020G17Rik	4930480D05Rik	RIKEN cDNA 1700020G17 gene	ncRNA
upeaks-31777	chr4	111483440	111483782	+	0	NA	intron (NM_001048189, intron 6 of 12)	MIR|SINE|MIR	68605	NM_026279	67621	Mm.45533	NM_026279	ENSMUSG00000028545	Bend5	2310026E23Rik	BEN domain containing 5	protein-coding
upeaks-12441	chr13	71784832	71785088	+	0	NA	Intergenic	Intergenic	178763	NM_010573	16371	Mm.316056	NM_010573	ENSMUSG00000060969	Irx1	-	Iroquois related homeobox 1 (Drosophila)	protein-coding
upeaks-37757	chr6	96432162	96432670	+	0	NA	intron (NM_182808, intron 2 of 4)	Lx8|LINE|L1	-266211	NR_003643	78482	Mm.391486	NM_030107	ENSMUSG00000072878	1700123L14Rik	-	nucleoporin 50 pseudogene	pseudo
upeaks-15445	chr15	25603366	25603676	+	0	NA	Intergenic	Intergenic	-19029	NM_019472	17909	Mm.60590	NM_019472	ENSMUSG00000022272	Myo10	AW048724|D15Ertd600e|mKIAA0799|myosin-X	myosin X	protein-coding
upeaks-34618	chr5	93006044	93006309	+	0	NA	Intergenic	Intergenic	38846	NM_175270	78088	Mm.245085	NM_175270	ENSMUSG00000045314	Sowahb	5730467H21Rik|Ankrd56	sosondowah ankyrin repeat domain family member B	protein-coding
upeaks-21113	chr18	34522893	34523293	+	0	NA	Intergenic	Intergenic	-16270	NM_146084	225358	Mm.226899	NM_146084	ENSMUSG00000036501	Fam13b	2610024E20Rik|AW060714|AW546153	family with sequence similarity 13, member B	protein-coding
upeaks-15433	chr15	23452036	23452525	+	0	NA	intron (NM_001081299, intron 10 of 11)	intron (NM_001081299, intron 10 of 11)	415817	NM_001081299	320865	Mm.241965	NM_001081299	ENSMUSG00000040420	Cdh18	B230220E17Rik|Cdh14l	cadherin 18	protein-coding
upeaks-27335	chr2	173795203	173795505	+	0	NA	Intergenic	Intergenic	57783	NM_019806	56491	Mm.260456	NM_019806	ENSMUSG00000054455	Vapb	AI225786|AI840687|AI848259|D2Abb2e|R75548|VAP33b|Vamp33b	vesicle-associated membrane protein, associated protein B and C	protein-coding
upeaks-34163	chr5	63903988	63904222	+	0	NA	Intergenic	Intergenic	64792	NM_145923	100532	Mm.243632	NM_145923	ENSMUSG00000047881	Rell1	AA536743	RELT-like 1	protein-coding
upeaks-13277	chr13	118658527	118659084	+	0	NA	promoter-TSS (NR_131153)	promoter-TSS (NR_131153)	-62	NR_131153	100038690	Mm.384983	NR_131153		Gm10732	ENSMUSG00000074638	predicted gene 10732	ncRNA
upeaks-4273	chr10	62528420	62528965	+	0	NA	Intergenic	Intergenic	-20937	NM_011157	19073	Mm.338790	NM_011157	ENSMUSG00000020077	Srgn	Prg|Prg1|Sgc	serglycin	protein-coding
upeaks-15365	chr15	10690132	10690637	+	0	NA	exon (NM_030690, exon 2 of 18)	exon (NM_030690, exon 2 of 18)	23156	NM_030690	75646	Mm.212395	NM_030690	ENSMUSG00000022246	Rai14	1700008J19Rik|1700020L11Rik|Ankycorbin|Norpeg|mKIAA1334	retinoic acid induced 14	protein-coding
upeaks-4691	chr10	80742105	80742655	+	0	NA	promoter-TSS (NM_007460)	promoter-TSS (NM_007460)	-169	NM_007460	11776	Mm.27082	NM_007460	ENSMUSG00000020198	Ap3d1	AA407035|Ap3d|Bolvr|mBLVR1|mh|mocha	adaptor-related protein complex 3, delta 1 subunit	protein-coding
upeaks-5433	chr10	117187134	117187529	+	0	NA	Intergenic	L2a|LINE|L2	37176	NM_026570	64050	Mm.233529	NM_026570	ENSMUSG00000020171	Yeats4	4930573H17Rik|B230215M10Rik|GAS41|NuBI-1	YEATS domain containing 4	protein-coding
upeaks-21633	chr18	61096374	61096751	+	0	NA	Intergenic	Intergenic	-9010	NM_001037859	12978	Mm.22574	NM_007779	ENSMUSG00000024621	Csf1r	AI323359|CD115|CSF-1R|Csfmr|Fim-2|Fim2|Fms|M-CSF-R|M-CSFR	colony stimulating factor 1 receptor	protein-coding
upeaks-12841	chr13	97524961	97525297	+	0	NA	Intergenic	Intergenic	-34871	NR_046157	328314	Mm.138047	NR_046157	ENSMUSG00000110235	Gm5086	B230311A21|EG328314	predicted gene 5086	ncRNA
upeaks-16390	chr15	80004634	80004885	+	0	NA	intron (NM_011057, intron 2 of 6)	intron (NM_011057, intron 2 of 6)	-5733	NR_106072	102465699		NR_106072	ENSMUSG00000099222	Mir7213	Gm27377|mmu-mir-7213	microRNA 7213	ncRNA
upeaks-31616	chr4	105430790	105431022	+	0	NA	Intergenic	Intergenic	273559	NM_080555	67916	Mm.348326	NM_080555	ENSMUSG00000028517	Plpp3	1110003O22Rik|2610002D05Rik|AV025606|D4Bwg0538e|D4Bwg1535e|Lpp3|Ppab2b|Ppap2b	phospholipid phosphatase 3	protein-coding
upeaks-45013	chr9	40460876	40461089	+	0	NA	Intergenic	Intergenic	-5218	NM_172768	235283	Mm.138434	NM_172768	ENSMUSG00000040111	Gramd1b	3222402H23|A930008A22Rik|AI593249|mKIAA1201	GRAM domain containing 1B	protein-coding
upeaks-41641	chr7	139301465	139301931	+	0	NA	Intergenic	Intergenic	53216	NM_001033206	101631	Mm.334300	NM_001033206	ENSMUSG00000060260	Pwwp2b	AI594893|D7Ertd517e|D930023J19Rik|Pwwp2	PWWP domain containing 2B	protein-coding
upeaks-42562	chr8	44877392	44877620	+	0	NA	Intergenic	Intergenic	-72702	NM_001081286	14107	Mm.27365	NM_001081286	ENSMUSG00000070047	Fat1	2310038E12Rik|AU023433|Fath|mFat1	FAT atypical cadherin 1	protein-coding
upeaks-16605	chr15	85991518	85991743	+	0	NA	intron (NM_009886, intron 1 of 34)	intron (NM_009886, intron 1 of 34)	42147	NM_009886	12614	Mm.22680	NM_009886	ENSMUSG00000016028	Celsr1	Adgrc1|Crsh|Scy|crash	cadherin, EGF LAG seven-pass G-type receptor 1	protein-coding
upeaks-85	chr1	9921397	9921715	+	0	NA	intron (NM_177722, intron 9 of 14)	MTD|LTR|ERVL-MaLR	12918	NM_177722	240697	Mm.259800	NM_177722	ENSMUSG00000046101	Mcmdc2	6030422M02Rik	minichromosome maintenance domain containing 2	protein-coding
upeaks-19404	chr17	31479304	31479725	+	0	NA	Intergenic	C-rich|Low_complexity|Low_complexity	32973	NM_021322	57773	Mm.143771	NM_021322	ENSMUSG00000024037	Wdr4	AI415180|AI448349|D530049K22Rik	WD repeat domain 4	protein-coding
upeaks-35176	chr5	116420791	116421029	+	0	NA	intron (NM_030704, intron 1 of 2)	intron (NM_030704, intron 1 of 2)	1954	NM_030704	80888	Mm.21549	NM_030704	ENSMUSG00000041548	Hspb8	AU018630|AW413033|Cryac|D5Ucla4|E2IG1|H11|H11K|HSP20-like|HSP22	heat shock protein 8	protein-coding
upeaks-10915	chr12	111882961	111883179	+	0	NA	intron (NM_011625, intron 1 of 16)	intron (NM_011625, intron 1 of 16)	24985	NM_011625	21981	Mm.313076	NM_011625	ENSMUSG00000021285	Ppp1r13b	AI449786|ASPP1|AW545810|Tp53bp2|Trp53bp2|p85	protein phosphatase 1, regulatory (inhibitor) subunit 13B	protein-coding
upeaks-11147	chr13	5897242	5897472	+	0	NA	Intergenic	Intergenic	35868	NM_011803	23849	Mm.275036	NM_011803	ENSMUSG00000000078	Klf6	AI448727|BCD1|C86813|CPBP|Copeb|FM2|FM6|Ierepo1|Ierepo3|R75280|Zf9	Kruppel-like factor 6	protein-coding
upeaks-37888	chr6	103320050	103320339	+	0	NA	Intergenic	Intergenic	-190682	NM_007697	12661	Mm.251288	NM_007697	ENSMUSG00000030077	Chl1	A530023M13Rik|AI465420|CALL|LICAM2	cell adhesion molecule L1-like	protein-coding
upeaks-20535	chr17	84682971	84683170	+	0	NA	promoter-TSS (NM_031884)	promoter-TSS (NM_031884)	-51	NR_104382	67470	Mm.26581	NM_026180	ENSMUSG00000024254	Abcg8	1300003C16Rik|AI114946|sterolin-2	ATP-binding cassette, sub-family G (WHITE), member 8	protein-coding
upeaks-27283	chr2	172481946	172482218	+	0	NA	Intergenic	B1F1|SINE|Alu	9528	NM_029608	76426	Mm.46148	NM_029608	ENSMUSG00000027505	Fam209	1700029J11Rik	family with sequence similarity 209	protein-coding
upeaks-28030	chr3	49642343	49642717	+	0	NA	Intergenic	Intergenic	114786	NM_130448	73173	Mm.87246	NM_130448	ENSMUSG00000037892	Pcdh18	3110038E07Rik|BB095589|PCDH68L	protocadherin 18	protein-coding
upeaks-23881	chr2	18855480	18855714	+	0	NA	intron (NM_008845, intron 6 of 9)	MIR|SINE|MIR	-53779	NR_131254	66774	Mm.87075	NR_131254	ENSMUSG00000097638	Carlr	4933439G12Rik|Carl	cardiac and apoptosis-related long non-coding RNA	ncRNA
upeaks-21706	chr18	64075716	64075981	+	0	NA	Intergenic	Intergenic	-178511	NM_009182	20451	Mm.252110	NM_009182	ENSMUSG00000056812	St8sia3	AI847333|ST8SiaIII|Siat8c	ST8 alpha-N-acetyl-neuraminide alpha-2,8-sialyltransferase 3	protein-coding
upeaks-26277	chr2	139579607	139579931	+	0	NA	intron (NM_175467, intron 7 of 12)	intron (NM_175467, intron 7 of 12)	85849	NM_175467	228677	Mm.100450	NM_175467	ENSMUSG00000039092	Sptlc3	C130053K05Rik	serine palmitoyltransferase, long chain base subunit 3	protein-coding
upeaks-21861	chr18	70529856	70530752	+	0	NA	promoter-TSS (NM_001136090)	promoter-TSS (NM_001136090)	17	NM_011972	26447	Mm.244352	NM_011972	ENSMUSG00000038425	Poli	Rad30b	polymerase (DNA directed), iota	protein-coding
upeaks-43939	chr8	115561554	115561895	+	0	NA	Intergenic	Intergenic	145170	NM_001025577	17132	Mm.275549	NM_001025577	ENSMUSG00000055435	Maf	2810401A20Rik|A230108G15Rik|AW047063|c-maf	avian musculoaponeurotic fibrosarcoma oncogene homolog	protein-coding
upeaks-24071	chr2	26603714	26604654	+	0	NA	exon (NM_026212, exon 1 of 6)	exon (NM_026212, exon 1 of 6)	233	NM_026212	67512	Mm.24244	NM_026212	ENSMUSG00000026922	Agpat2	2510002J07Rik|AV000834|BSCL|BSCL1|LPAAB|LPAAT-beta	1-acylglycerol-3-phosphate O-acyltransferase 2 (lysophosphatidic acid acyltransferase, beta)	protein-coding
upeaks-28172	chr3	57487456	57487724	+	0	NA	intron (NM_001168281, intron 3 of 6)	intron (NM_001168281, intron 3 of 6)	62180	NM_145539	229302	Mm.26618	NM_145539	ENSMUSG00000027801	Tm4sf4	Iltmp	transmembrane 4 superfamily member 4	protein-coding
upeaks-43172	chr8	82387651	82387850	+	0	NA	intron (NM_001254747, intron 1 of 7)	intron (NM_001254747, intron 1 of 7)	14836	NM_008357	16168	Mm.4392	NM_008357	ENSMUSG00000031712	Il15	AI503618|IL-15	interleukin 15	protein-coding
upeaks-19745	chr17	45950560	45950951	+	0	NA	Intergenic	Intergenic	74408	NM_001110266	22339	Mm.282184	NM_009505	ENSMUSG00000023951	Vegfa	Vegf|Vpf	vascular endothelial growth factor A	protein-coding
upeaks-3666	chr10	26828512	26829094	+	0	NA	intron (NM_176837, intron 1 of 14)	intron (NM_176837, intron 1 of 14)	56291	NM_176837	73910	Mm.356496	NM_176837	ENSMUSG00000039031	Arhgap18	4833419J07Rik|AI314906|AI843501	Rho GTPase activating protein 18	protein-coding
upeaks-18910	chr17	12750018	12750217	+	0	NA	intron (NM_010515, intron 1 of 47)	intron (NM_010515, intron 1 of 47)	8806	NR_002853	104103	Mm.26553	NR_002853	ENSMUSG00000078247	Airn	2810051F02Rik|2810434M15Rik|AI256653|AI597500|AW049873|Air|B930018I07Rik|D17Ertd663e|IGF2RAS	antisense Igf2r RNA	ncRNA
upeaks-17574	chr16	23114455	23114695	+	0	NA	TTS (NM_001123037)	TTS (NM_001123037)	3805	NR_034048	100217420	Mm.260084	NR_034048	ENSMUSG00000087935	Snora81	MBI-61	small nucleolar RNA, H/ACA box 81	snoRNA
upeaks-38663	chr6	140016782	140016981	+	0	NA	intron (NM_054066, intron 5 of 13)	intron (NM_054066, intron 5 of 13)	24536	NM_054066	114875	Mm.50808	NM_054066	ENSMUSG00000030230	Plcz1	1700041H07Rik|PLCzeta	phospholipase C, zeta 1	protein-coding
upeaks-35598	chr5	132505001	132505200	+	0	NA	intron (NM_177047, intron 1 of 18)	MTD|LTR|ERVL-MaLR	37243	NM_177047	319974	Mm.409595	NM_177047	ENSMUSG00000029673	Auts2	2700063G02Rik|A730011F23Rik|D830032G16Rik	autism susceptibility candidate 2	protein-coding
upeaks-25162	chr2	80512545	80512811	+	0	NA	exon (NM_001290745, exon 27 of 32)	exon (NM_001290745, exon 27 of 32)	-65282	NM_011356	20378	Mm.427436	NM_011356	ENSMUSG00000027004	Frzb	Frp|Sfrp3|frezzled|fritz|frzb-1	frizzled-related protein	protein-coding
upeaks-25594	chr2	109942109	109942344	+	0	NA	intron (NM_172671, intron 1 of 17)	intron (NM_172671, intron 1 of 17)	24579	NM_172671	107515	Mm.277351	NM_172671	ENSMUSG00000050199	Lgr4	9130225G07|A330106J01Rik|A930009A08Rik|Gpr48	leucine-rich repeat-containing G protein-coupled receptor 4	protein-coding
upeaks-21906	chr18	73925397	73925657	+	0	NA	Intergenic	Intergenic	66142	NM_027741	71263	Mm.126220	NM_027741	ENSMUSG00000064036	Mro	4930507C04Rik|4933435E20Rik	maestro	protein-coding
upeaks-39259	chr7	19695715	19696022	+	0	NA	TTS (NM_009696)	TTS (NM_009696)	2530	NM_001305819	11816	Mm.305152	NM_009696	ENSMUSG00000002985	Apoe	AI255918|Apo-E	apolipoprotein E	protein-coding
upeaks-38932	chr7	3073394	3073619	+	0	NA	Intergenic	Intergenic	-54640	NR_001583	73949	Mm.55687	NR_001583	ENSMUSG00000107956	Speer9-ps1	4930415A14Rik|SPEER-9|Speer9-ps	spermatogenesis associated glutamate (E)-rich protein 9, pseudogene 1	pseudo
upeaks-37979	chr6	113054679	113054997	+	0	NA	intron (NM_008188, intron 3 of 9)	B1_Mus2|SINE|Alu	8511	NM_008188	14911	Mm.781	NM_008188	ENSMUSG00000030264	Thumpd3	AW556087|Gt(ROSA)26asSor|Gtrosa26as	THUMP domain containing 3	protein-coding
upeaks-12579	chr13	78871188	78872348	+	0	NA	Intergenic	Intergenic	-672895	NM_010151	13865	Mm.439653	NM_010151	ENSMUSG00000069171	Nr2f1	COUP-TF1|COUP-TFI|COUPTFA|EAR-3|EAR3|Erbal3|SVP44|Tcfcoup1	nuclear receptor subfamily 2, group F, member 1	protein-coding
upeaks-43325	chr8	87024108	87024421	+	0	NA	Intergenic	Intergenic	-139006	NM_030563	80750	Mm.25117	NM_030563	ENSMUSG00000031652	N4bp1	AI481586|C81621	NEDD4 binding protein 1	protein-coding
upeaks-14052	chr14	48591956	48592201	+	0	NA	Intergenic	Intergenic	70794	NM_144841	18424	Mm.134516	NM_144841	ENSMUSG00000021848	Otx2	E130306E05Rik	orthodenticle homeobox 2	protein-coding
upeaks-18247	chr16	71851522	71852040	+	0	NA	Intergenic	Intergenic	382546	NR_131115	319533	Mm.373754	NR_131115		8030451O07Rik	-	RIKEN cDNA 8030451O07 gene	ncRNA
upeaks-10579	chr12	99514829	99515116	+	0	NA	Intergenic	Intergenic	-48869	NR_136760	102639404	Mm.396324	NR_136760	ENSMUSG00000097917	Gm26839	-	predicted gene, 26839	ncRNA
upeaks-23908	chr2	20496056	20496536	+	0	NA	intron (NM_001081006, intron 2 of 21)	intron (NM_001081006, intron 2 of 21)	-13751	NM_029895	208618	Mm.237935	NM_029895	ENSMUSG00000036617	Etl4	6620402G01Rik|9430077C05Rik|BC026657|E330027G05Rik|Etl-4|Skt	enhancer trap locus 4	protein-coding
upeaks-29560	chr3	129273082	129273486	+	0	NA	intron (NM_007934, intron 18 of 19)	intron (NM_007934, intron 18 of 19)	59352	NM_001042502	18741	Mm.246804	NM_011098	ENSMUSG00000028023	Pitx2	9430085M16Rik|Brx1|Brx1b|Munc30|Otlx2|Ptx2|Rieg	paired-like homeodomain transcription factor 2	protein-coding
upeaks-29350	chr3	118594976	118595258	+	0	NA	intron (NM_170778, intron 1 of 22)	intron (NM_170778, intron 1 of 22)	32939	NM_170778	99586	Mm.27907	NM_170778	ENSMUSG00000033308	Dpyd	AI315208|DPD|E330028L06Rik	dihydropyrimidine dehydrogenase	protein-coding
upeaks-9211	chr12	7950082	7950669	+	0	NA	Intergenic	Intergenic	-27302	NM_009693	238055	Mm.221239	NM_009693	ENSMUSG00000020609	Apob	AI315052|Apo B-100|apob-100|apob-48	apolipoprotein B	protein-coding
upeaks-29905	chr3	144554522	144554843	+	0	NA	intron (NM_011828, intron 1 of 6)	intron (NM_011828, intron 1 of 6)	15534	NM_011828	23908	Mm.12863	NM_011828	ENSMUSG00000040151	Hs2st1	AW214369|Hs2st|mKIAA0448	heparan sulfate 2-O-sulfotransferase 1	protein-coding
upeaks-22649	chr19	18730232	18730619	+	0	NA	Intergenic	Intergenic	17189	NM_177640	225995	Mm.28101	NM_177640	ENSMUSG00000047044	D030056L22Rik	-	RIKEN cDNA D030056L22 gene	protein-coding
upeaks-3965	chr10	43815293	43815546	+	0	NA	Intergenic	Intergenic	-10488	NR_131055	71018	Mm.410796	NR_131055	ENSMUSG00000111342	4933404K13Rik	-	RIKEN cDNA 4933404K13 gene	ncRNA
upeaks-43486	chr8	94354173	94354546	+	0	NA	intron (NM_019415, intron 21 of 24)	intron (NM_019415, intron 21 of 24)	25151	NM_001205311	20497	Mm.25804	NM_019415	ENSMUSG00000031766	Slc12a3	AI035291|NCC|NCCT|TSC	solute carrier family 12, member 3	protein-coding
upeaks-27015	chr2	165459657	165460164	+	0	NA	intron (NM_054055, intron 1 of 12)	intron (NM_054055, intron 1 of 12)	13287	NM_054055	114644	Mm.250738	NM_054055	ENSMUSG00000018459	Slc13a3	NaDC-3|NaDC3|SDCT2	solute carrier family 13 (sodium-dependent dicarboxylate transporter), member 3	protein-coding
upeaks-17513	chr16	21083712	21084136	+	0	NA	Intergenic	RLTR1D|LTR|ERV1	70020	NM_025634	66561	Mm.422867	NM_025634	ENSMUSG00000090356	Teddm3	2310042E22Rik	transmembrane epididymal family member 3	protein-coding
upeaks-26751	chr2	156194690	156194890	+	0	NA	Intergenic	Intergenic	-1857	NM_172674	228829	Mm.427078	NM_172674	ENSMUSG00000038116	Phf20	6820402O20Rik	PHD finger protein 20	protein-coding
upeaks-9531	chr12	29128924	29129123	+	0	NA	Intergenic	Intergenic	377195	NM_201357	380752	Mm.273724	NM_201357	ENSMUSG00000036613	Tssc1	D12Ertd604e|Eipr1	tumor suppressing subtransferable candidate 1	protein-coding
upeaks-21870	chr18	70926922	70927241	+	0	NA	Intergenic	Intergenic	358789	NM_001311071	17191	Mm.322	NM_010773	ENSMUSG00000024513	Mbd2	MBD2a	methyl-CpG binding domain protein 2	protein-coding
upeaks-7656	chr11	80784263	80784547	+	0	NA	Intergenic	MTD|LTR|ERVL-MaLR	-4380	NM_177390	338367	Mm.151948	NM_177390	ENSMUSG00000035441	Myo1d	9930104H07Rik|AW544947|D11Ertd9e|myosin-1d	myosin ID	protein-coding
upeaks-34498	chr5	88559061	88559314	+	0	NA	Intergenic	Intergenic	4704	NM_023054	65961	Mm.490364	NM_023054	ENSMUSG00000070697	Utp3	2400011K09Rik|AW557551|C87704|Crl1|Crlz1|Sas10	UTP3 small subunit processome component	protein-coding
upeaks-41940	chr8	7472471	7473002	+	0	NA	Intergenic	Intergenic	1188037	NM_010111	13642	Mm.209813	NM_010111	ENSMUSG00000001300	Efnb2	ELF-2|Epl5|Eplg5|Htk-L|LERK-5|Lerk5|NLERK-1	ephrin B2	protein-coding
upeaks-34523	chr5	89218365	89218607	+	0	NA	intron (NM_001197147, intron 20 of 25)	intron (NM_001197147, intron 20 of 25)	239412	NM_008096	14473	Mm.196595	NM_008096	ENSMUSG00000035540	Gc	DBP|VDB	group specific component	protein-coding
upeaks-19325	chr17	28983064	28983306	+	0	NA	intron (NM_134115, intron 6 of 13)	intron (NM_134115, intron 6 of 13)	24752	NM_134115	106504	Mm.439986	NM_134115	ENSMUSG00000024006	Stk38	5830476G13Rik|9530097A09Rik|AA617404|Ndr1	serine/threonine kinase 38	protein-coding
upeaks-20460	chr17	83100884	83101159	+	0	NA	Intergenic	MER124|DNA?|DNA?	-22796	NR_045094	100503434	Mm.187281	NR_045094		Gm19689	-	predicted gene, 19689	ncRNA
upeaks-23677	chr2	6540164	6540363	+	0	NA	3' UTR (NM_001110228, exon 14 of 14)	3' UTR (NM_001110228, exon 14 of 14)	181399	NM_001310447	14007	Mm.398543	NM_010160	ENSMUSG00000002107	Celf2	B230218O03|B230345P09Rik|C88023|CELF-2|CUG-BP2|Cugbp2|D230046B21Rik|Etr-3|Napor|Napor-2|mETR-3	CUGBP, Elav-like family member 2	protein-coding
upeaks-17561	chr16	22572652	22572977	+	0	NA	intron (NM_138650, intron 11 of 24)	intron (NM_138650, intron 11 of 24)	-40630	NR_106170	102465887		NR_106170	ENSMUSG00000099071	Mir8095	Gm27566|mmu-mir-8095	microRNA 8095	ncRNA
upeaks-4868	chr10	86138978	86139226	+	0	NA	intron (NM_013722, intron 6 of 13)	intron (NM_013722, intron 6 of 13)	43248	NR_038024	78170	Mm.444790	NR_038024		4930486F22Rik	-	RIKEN cDNA 4930486F22 gene	ncRNA
upeaks-25958	chr2	126147800	126148034	+	0	NA	intron (NM_029455, intron 1 of 16)	PB1D10|SINE|Alu	4087	NM_029455	75823	Mm.444732	NM_029455	ENSMUSG00000027209	Fam227b	4930525F21Rik	family with sequence similarity 227, member B	protein-coding
upeaks-45405	chr9	57082324	57082548	+	0	NA	intron (NM_001110351, intron 2 of 21)	intron (NM_001110351, intron 2 of 21)	6060	NM_001110350	20466	Mm.15755	NM_011378	ENSMUSG00000042557	Sin3a	AW553200|Sin3|mKIAA4126|mSin3A	transcriptional regulator, SIN3A (yeast)	protein-coding
upeaks-15852	chr15	55563778	55563977	+	0	NA	intron (NM_134092, intron 4 of 21)	intron (NM_134092, intron 4 of 21)	6469	NM_001168250	105837	Mm.390829	NM_134092	ENSMUSG00000022369	Mtbp	AI429604|MDM2BP	Mdm2, transformed 3T3 cell double minute p53 binding protein	protein-coding
upeaks-11926	chr13	46744975	46745344	+	0	NA	Intergenic	RMER5|LTR|ERV1	-17310	NM_175749	218210	Mm.255398	NM_175749	ENSMUSG00000021374	Nup153	B130015D15Rik|C88147	nucleoporin 153	protein-coding
upeaks-30568	chr4	33270117	33270316	+	0	NA	Intergenic	LTRIS2|LTR|ERV1	-21429	NM_001033225	108767	Mm.27769	NM_001033225	ENSMUSG00000040128	Pnrc1	5730463C12Rik|B4-2|PRR2|Prol2	proline-rich nuclear receptor coactivator 1	protein-coding
upeaks-40273	chr7	77632799	77633052	+	0	NA	Intergenic	Intergenic	944913	NM_182809	18213	Mm.33496	NM_008746	ENSMUSG00000059146	Ntrk3	AW125844|Ntrk3_tv3|TrkC	neurotrophic tyrosine kinase, receptor, type 3	protein-coding
upeaks-33217	chr4	154479024	154479257	+	0	NA	intron (NM_001177995, intron 2 of 15)	intron (NM_001177995, intron 2 of 15)	157227	NR_045643	320939	Mm.436738	NR_045643		5930403L14Rik	-	RIKEN cDNA 5930403L14 gene	ncRNA
upeaks-20046	chr17	57290205	57290803	+	0	NA	intron (NM_001163816, intron 1 of 25)	intron (NM_001163816, intron 1 of 25)	11404	NM_011691	22324	Mm.248172	NM_011691	ENSMUSG00000034116	Vav1	Vav|vav-T	vav 1 oncogene	protein-coding
upeaks-33365	chr5	5303379	5303765	+	0	NA	intron (NM_011074, intron 2 of 14)	intron (NM_011074, intron 2 of 14)	-37504	NM_001310448	18647	Mm.389061	NM_011074	ENSMUSG00000028926	Cdk14	Pftk1|mKIAA0834	cyclin-dependent kinase 14	protein-coding
upeaks-32261	chr4	129234400	129234825	+	0	NA	intron (NM_001285867, intron 1 of 6)	MIRb|SINE|MIR	4606	NM_001285865	97130	Mm.331907	NM_001033189	ENSMUSG00000050390	C77080	Kiaa1522|mKIAA1522	expressed sequence C77080	protein-coding
upeaks-25936	chr2	125240123	125240347	+	0	NA	Intergenic	LTRIS2|LTR|ERV1	-7013	NM_001159646	110074	Mm.282499	NM_023595	ENSMUSG00000027203	Dut	5031412I06Rik|5133400F09Rik|D2Bwg0749e|Dutp|dUTPase	deoxyuridine triphosphatase	protein-coding
upeaks-6161	chr11	19616325	19616922	+	0	NA	Intergenic	Intergenic	-307819	NM_033523	114716	Mm.266627	NM_033523	ENSMUSG00000045671	Spred2	C79158	sprouty-related, EVH1 domain containing 2	protein-coding
upeaks-15279	chr15	6230647	6230959	+	0	NA	Intergenic	ORR1D2|LTR|ERVL-MaLR	-68986	NM_001008702	13132	Mm.240830	NM_023118	ENSMUSG00000022150	Dab2	5730435J12Rik|AA960054|AI957090|D15Wsu122e|D630005B22Rik|Doc-2|Doc2|p96	disabled 2, mitogen-responsive phosphoprotein	protein-coding
upeaks-5424	chr10	117021065	117021503	+	0	NA	intron (NM_001007583, intron 9 of 9)	intron (NM_001007583, intron 9 of 9)	-24057	NM_146242	237560	Mm.37320	NM_146242	ENSMUSG00000060187	Lrrc10	D330003I11Rik|Hrlrrp|Serdin1	leucine rich repeat containing 10	protein-coding
upeaks-22181	chr18	85697914	85698318	+	0	NA	Intergenic	LSU-rRNA_Hsa|rRNA|rRNA	-696836	NM_144946	246317	Mm.329578	NM_144946	ENSMUSG00000050321	Neto1	AI851453|Btcl1|C130005O10Rik	neuropilin (NRP) and tolloid (TLL)-like 1	protein-coding
upeaks-35887	chr5	140034284	140034693	+	0	NA	intron (NM_010752, intron 17 of 17)	intron (NM_010752, intron 17 of 17)	126545	NM_175522	243312	Mm.237102	NM_175522	ENSMUSG00000048988	Elfn1	A930017N06Rik|AI197272|Ppp1r28	leucine rich repeat and fibronectin type III, extracellular 1	protein-coding
upeaks-13862	chr14	34275324	34275523	+	0	NA	intron (NM_029389, intron 2 of 10)	intron (NM_029389, intron 2 of 10)	35080	NM_029389	75698	Mm.45406	NM_029389	ENSMUSG00000041471	Fam35a	3110001K24Rik	family with sequence similarity 35, member A	protein-coding
upeaks-47844	chrX	137088166	137088378	+	0	NA	Intergenic	Intergenic	32054	NM_007957	13984	Mm.8017	NM_007957	ENSMUSG00000023443	Esx1	Spx1	extraembryonic, spermatogenesis, homeobox 1	protein-coding
upeaks-15093	chr14	118766523	118766924	+	0	NA	Intergenic	Intergenic	-21148	NM_001160097	58187	Mm.390755	NM_021386	ENSMUSG00000022132	Cldn10	6720456I16Rik|Cldn10a|Cldn10b|D14Ertd728e	claudin 10	protein-coding
upeaks-3315	chr10	7140272	7140682	+	0	NA	intron (NM_172546, intron 5 of 12)	intron (NM_172546, intron 5 of 12)	71760	NM_172546	215748	Mm.37984	NM_172546	ENSMUSG00000015202	Cnksr3	6820402C05|BC024086|Magi1	Cnksr family member 3	protein-coding
upeaks-4463	chr10	75565964	75566367	+	0	NA	Intergenic	Intergenic	-2497	NM_001305992	14598	Mm.4559	NM_008116	ENSMUSG00000006345	Ggt1	CD224|GGT|GGT 1|GGT-1|Ggtp|dwg	gamma-glutamyltransferase 1	protein-coding
upeaks-11817	chr13	41998027	41998250	+	0	NA	Intergenic	Intergenic	-53883	NM_007772	110521	Mm.4808	NM_007772	ENSMUSG00000021366	Hivep1	Cryabp1	human immunodeficiency virus type I enhancer binding protein 1	protein-coding
upeaks-10048	chr12	73393838	73394127	+	0	NA	intron (NR_046013, intron 2 of 3)	intron (NR_046013, intron 2 of 3)	15581	NR_046013	380765	Mm.490476	NR_046013		D830013O20Rik	Gm891	RIKEN cDNA D830013O20 gene	ncRNA
upeaks-22	chr1	4774932	4775526	+	0	NA	3' UTR (NM_001177658, exon 5 of 5)	3' UTR (NM_001177658, exon 5 of 5)	10497	NR_033530	27395	Mm.182927	NM_025300	ENSMUSG00000033845	Mrpl15	HSPC145|MRP-L7|Rpml7	mitochondrial ribosomal protein L15	protein-coding
upeaks-10178	chr12	79069194	79069955	+	0	NA	intron (NM_181073, intron 17 of 28)	intron (NM_181073, intron 17 of 28)	20096	NM_029988	110417	Mm.268317	NM_029988	ENSMUSG00000021120	Pigh	2210416H01Rik|A930028P05Rik	phosphatidylinositol glycan anchor biosynthesis, class H	protein-coding
upeaks-45070	chr9	42727719	42728101	+	0	NA	intron (NM_175481, intron 3 of 20)	intron (NM_175481, intron 3 of 20)	216461	NM_175481	110637	Mm.370291	NM_175481	ENSMUSG00000032017	Grik4	6330551K01Rik|GluK4|GluRgamma1|KA-1|KA1	glutamate receptor, ionotropic, kainate 4	protein-coding
upeaks-35349	chr5	122524953	122525209	+	0	NA	Intergenic	Intergenic	-22856	NM_009722	11938	Mm.227583	NM_009722	ENSMUSG00000029467	Atp2a2	9530097L16Rik|D5Wsu150e|SERCA2|SERCA2B|Serca2a|mKIAA4195	ATPase, Ca++ transporting, cardiac muscle, slow twitch 2	protein-coding
upeaks-13253	chr13	117215261	117215716	+	0	NA	Intergenic	Intergenic	-5085	NM_010330	13723	Mm.274926	NM_010330	ENSMUSG00000021728	Emb	AL022799|Gp70	embigin	protein-coding
upeaks-4029	chr10	51571288	51571600	+	0	NA	Intergenic	RLTR26_Mus|LTR|ERVK	19016	NM_029894	77296	Mm.30588	NM_029894	ENSMUSG00000019909	Fam162b	9430073N08Rik	family with sequence similarity 162, member B	protein-coding
upeaks-5085	chr10	96689987	96690288	+	0	NA	Intergenic	Intergenic	73136	NM_007569	12226	Mm.23811	NM_007569	ENSMUSG00000036478	Btg1	AI426953|AW546738	B cell translocation gene 1, anti-proliferative	protein-coding
upeaks-37087	chr6	54718980	54719223	+	0	NA	Intergenic	Intergenic	37477	NM_001289741	68235	Mm.233860	NM_026629	ENSMUSG00000038065	Mturn	2410066E13Rik|AI448550|B230212L03Rik	maturin, neural progenitor differentiation regulator homolog (Xenopus)	protein-coding
upeaks-28246	chr3	62801148	62801400	+	0	NA	Intergenic	BGLII_B|LTR|ERVK	-196134	NM_177346	229357	Mm.95181	NM_177346	ENSMUSG00000043441	Gpr149	9630018L10Rik|Ieda|PGR10|R35	G protein-coupled receptor 149	protein-coding
upeaks-41241	chr7	123405678	123406105	+	0	NA	intron (NM_025304, intron 5 of 10)	MLT1H|LTR|ERVL-MaLR	27909	NM_025304	30949	Mm.260527	NM_025304	ENSMUSG00000030763	Lcmt1	AL033290|LCMT-1|Lcmt	leucine carboxyl methyltransferase 1	protein-coding
upeaks-43295	chr8	85220959	85221444	+	0	NA	Intergenic	RMER21A|LTR|ERV1	-9296	NM_146859	258858	Mm.354727	NM_146859	ENSMUSG00000051952	Olfr371	MOR141-3	olfactory receptor 371	protein-coding
upeaks-16841	chr15	97421618	97421866	+	0	NA	Intergenic	RLTR41|LTR|ERV1	-174455	NM_178114	105827	Mm.24005	NM_178114	ENSMUSG00000048218	Amigo2	AI415330|AMIGO-2|AW208913|Ali1	adhesion molecule with Ig like domain 2	protein-coding
upeaks-48099	chrX	166531731	166531943	+	0	NA	intron (NM_019397, intron 10 of 11)	intron (NM_019397, intron 10 of 11)	-21359	NM_001007577	245695	Mm.336318	NM_001007577	ENSMUSG00000051224	Tceanc	A630018P17Rik|Gm390	transcription elongation factor A (SII) N-terminal and central domain containing	protein-coding
upeaks-40759	chr7	101870595	101870972	+	0	NA	promoter-TSS (NM_008034)	promoter-TSS (NM_008034)	5	NM_001252554	14275	Mm.2135	NM_008034	ENSMUSG00000001827	Folr1	FBP1|Folbp-1|Folbp1	folate receptor 1 (adult)	protein-coding
upeaks-46091	chr9	83834265	83835419	+	0	NA	intron (NM_009445, intron 1 of 21)	CpG	153	NM_001284272	22137	Mm.1904	NM_009445	ENSMUSG00000038379	Ttk	AL022661|Esk1|Mps1|PYT|esk	Ttk protein kinase	protein-coding
upeaks-18757	chr17	5010851	5011199	+	0	NA	intron (NM_001085355, intron 1 of 19)	intron (NM_001085355, intron 1 of 19)	15951	NM_001085355	239985	Mm.133401	NM_001085355	ENSMUSG00000069729	Arid1b	8030481M12|9330189K18Rik|AI836955|Ardi1b|B230217J03Rik|mKIAA1235	AT rich interactive domain 1B (SWI-like)	protein-coding
upeaks-11117	chr13	4233486	4233918	+	0	NA	promoter-TSS (NM_001013785)	promoter-TSS (NM_001013785)	-38	NM_001013785	432720	Mm.22832	NM_001013785	ENSMUSG00000071551	Akr1c19	1810010N06Rik	aldo-keto reductase family 1, member C19	protein-coding
upeaks-38588	chr6	136652530	136652977	+	0	NA	intron (NM_025806, intron 1 of 10)	intron (NM_025806, intron 1 of 10)	9140	NM_025806	66857	Mm.3311	NM_025806	ENSMUSG00000030214	Plbd1	1100001H23Rik	phospholipase B domain containing 1	protein-coding
[truncated: 6,586 more rows]

## Sheet: Proximal peaks
PeakID (cmd=annotatePeaks.pl proximal_.bed mm10)	Chr	Start	End	Strand	Peak Score	Focus Ratio/Region Size	Annotation	Detailed Annotation	Distance to TSS	Nearest PromoterID	Entrez ID	Nearest Unigene	Nearest Refseq	Nearest Ensembl	Gene Name	Gene Alias	Gene Description	Gene Type
[truncated: 762 more rows]

[truncated: 1 more sheets: Distal peaks]
