# Supplementary material for: Single cell RNA-seq and ATAC-seq analysis of cardiac progenitor cell transition states and lineage settlement
Source: Nat Commun. 2018 Nov 19;9:4877. doi: 10.1038/s41467-018-07307-6 (PMC6242939; doi:10.1038/s41467-018-07307-6)
Supplement: Supplementary file 11 — Supplementary Data 7 [file 41467_2018_7307_MOESM11_ESM.xlsx]

## Sheet: Nkx2-5_E7.5_8.5_9.5_DifferPeaks
Supplementary Data 7. List of differential chromatin accessibility peaks of Nkx2-5 CPCs.
PeakID (cmd=annotatePeaks.pl nkxE789_DEpeaks.bed mm10)	Chr	Start	End	Strand	Peak Score	Focus Ratio/Region Size	Annotation	Detailed Annotation	Distance to TSS	Nearest PromoterID	Entrez ID	Nearest Unigene	Nearest Refseq	Nearest Ensembl	Gene Name	Gene Alias	Gene Description	Gene Type
upeaks-30518	chr4	13364784	13365172	+	0	NA	Intergenic	Intergenic	-378324	NM_001111026	12395	Mm.4909	NM_009822	ENSMUSG00000006586	Runx1t1	Cbfa2t1h|ETO|MTG8	runt-related transcription factor 1; translocated to, 1 (cyclin D-related)	protein-coding
upeaks-16573	chr15	86858250	86859012	+	0	NA	Intergenic	Intergenic	644172	NM_145476	223754	Mm.28904	NM_145476	ENSMUSG00000051864	Tbc1d22a	BC023106|D15Ertd781e	TBC1 domain family, member 22a	protein-coding
upeaks-30728	chr4	33911985	33912406	+	0	NA	Intergenic	Intergenic	-12437	NM_007726	12801	Mm.7992	NM_007726	ENSMUSG00000044288	Cnr1	CB-R|CB1|CB1R	cannabinoid receptor 1 (brain)	protein-coding
upeaks-25069	chr2	80275169	80275475	+	0	NA	Intergenic	ORR1E|LTR|ERVL-MaLR	-17148	NM_177256	320769	Mm.60992	NM_177256	ENSMUSG00000050114	Prdx6b	1-cysPrx-P1|4930414C22Rik|Aop2-rs1|Prdx5-rs1|Prdx6-ps1|Prdx6-rs1|Prdx6-rs1-ps	peroxiredoxin 6B	protein-coding
upeaks-30569	chr4	19883569	19884027	+	0	NA	intron (NM_175406, intron 5 of 7)	intron (NM_175406, intron 5 of 7)	38768	NM_175406	242341	Mm.19298	NM_175406	ENSMUSG00000028238	Atp6v0d2	1620401A02Rik|AI324824|V-ATPase	ATPase, H+ transporting, lysosomal V0 subunit D2	protein-coding
upeaks-16721	chr15	93827033	93827235	+	0	NA	Intergenic	(CATTC)n|Simple_repeat|Simple_repeat	99977	NR_045737	77248	Mm.410768	NR_045737		9430014N10Rik	-	RIKEN cDNA 9430014N10 gene	ncRNA
upeaks-36282	chr5	147304943	147305142	+	0	NA	intron (NM_007673, intron 1 of 2)	CpG	2207	NM_007673	12591	Mm.20358	NM_007673	ENSMUSG00000029646	Cdx2	Cdx-2	caudal type homeobox 2	protein-coding
upeaks-5943	chr11	5691798	5692120	+	0	NA	Intergenic	Intergenic	15740	NM_026080	64660	Mm.7328	NM_026080	ENSMUSG00000020477	Mrps24	3110030K20Rik|AI414579|Rpms24	mitochondrial ribosomal protein S24	protein-coding
upeaks-44741	chr8	126826338	126826991	+	0	NA	Intergenic	Intergenic	119257	NM_024214	67952	Mm.6932	NM_024214	ENSMUSG00000093904	Tomm20	1810060K07Rik|BB284719|Gm19268|MAS20|MOM19|TOM20|mKIAA0016	translocase of outer mitochondrial membrane 20 homolog (yeast)	protein-coding
upeaks-44760	chr8	127704065	127704463	+	0	NA	Intergenic	Intergenic	404612	NM_001013580	93742	Mm.299254	NM_033620	ENSMUSG00000025812	Pard3	AA960621|AI256638|Asip|D8Ertd580e|Par-3|Par3|Pard-3|Pard3a|Phip	par-3 family cell polarity regulator	protein-coding
upeaks-30320	chr3	158885697	158885991	+	0	NA	Intergenic	RLTR41A2|LTR|ERV1	-190520	NR_040750	624759	Mm.491054	NR_040750	ENSMUSG00000106053	Gm20752	-	predicted gene, 20752	ncRNA
upeaks-26855	chr2	159913536	159913738	+	0	NA	Intergenic	RLTR9B|LTR|ERVK	-33704	NR_040498	71081	Mm.383491	NR_040498	ENSMUSG00000085198	4933416E03Rik	-	RIKEN cDNA 4933416E03 gene	ncRNA
upeaks-29891	chr3	138918227	138918586	+	0	NA	Intergenic	Intergenic	156795	NM_145544	229877	Mm.28893	NM_145544	ENSMUSG00000028149	Rap1gds1	BC011279|GDS1	RAP1, GTP-GDP dissociation stimulator 1	protein-coding
upeaks-13147	chr13	113484252	113484479	+	0	NA	intron (NR_045501, intron 3 of 6)	intron (NR_045501, intron 3 of 6)	18479	NR_045501	70917	Mm.491036	NR_045501		4921509O07Rik	-	RIKEN cDNA 4921509O07 gene	ncRNA
upeaks-30005	chr3	144947451	144947650	+	0	NA	Intergenic	RLTR9F|LTR|ERVK	-15021	NM_001033199	99709	Mm.440040	NM_001033199	ENSMUSG00000074195	Clca4b	AI747448|Clca7	chloride channel accessory 4B	protein-coding
upeaks-2276	chr1	155113969	155114302	+	0	NA	Intergenic	MTEa|LTR|ERVL-MaLR	-14499	NM_010500	15939	Mm.12246	NM_010500	ENSMUSG00000056708	Ier5	-	immediate early response 5	protein-coding
upeaks-9697	chr12	45507687	45507895	+	0	NA	Intergenic	Intergenic	-433308	NM_144552	217517	Mm.285400	NM_144552	ENSMUSG00000046314	Stxbp6	BC024598|C85317	syntaxin binding protein 6 (amisyn)	protein-coding
upeaks-35237	chr5	113628068	113628283	+	0	NA	intron (NM_008153, intron 1 of 2)	intron (NM_008153, intron 1 of 2)	22215	NM_008153	14747	Mm.5196	NM_008153	ENSMUSG00000042190	Cmklr1	ChemR23|DEZ|Gpcr27|mcmklr1	chemokine-like receptor 1	protein-coding
upeaks-47270	chr9	120027544	120027785	+	0	NA	Intergenic	Intergenic	-4066	NM_011724	22437	Mm.10117	NM_011724	ENSMUSG00000079243	Xirp1	AI415219|Cmya1	xin actin-binding repeat containing 1	protein-coding
upeaks-30353	chr4	3830372	3830592	+	0	NA	Intergenic	B3|SINE|B2	5173	NM_026147	67427	Mm.21938	NM_026147	ENSMUSG00000028234	Rps20	4632426K06Rik|Dsk4	ribosomal protein S20	protein-coding
upeaks-44978	chr9	16302317	16302540	+	0	NA	intron (NM_001080814, intron 1 of 24)	intron (NM_001080814, intron 1 of 24)	75803	NM_001080814	270120	Mm.195010	NM_001080814	ENSMUSG00000074505	Fat3	9430076A06Rik|D430038H04Rik|Gm1132|Gm510|MFAT3F	FAT atypical cadherin 3	protein-coding
upeaks-42740	chr8	33853560	33853861	+	0	NA	intron (NM_001042674, intron 4 of 7)	intron (NM_001042674, intron 4 of 7)	76153	NM_001042675	19663	Mm.323997	NM_019733	ENSMUSG00000031586	Rbpms	2010300K22Rik|2700019M19Rik|AU017537|RBP-MS|hermes	RNA binding protein gene with multiple splicing	protein-coding
upeaks-5412	chr10	115722680	115723027	+	0	NA	Intergenic	Intergenic	-94431	NM_146010	216350	Mm.22270	NM_146010	ENSMUSG00000034127	Tspan8	C76990|E330007O21Rik|Tm4sf3	tetraspanin 8	protein-coding
upeaks-29147	chr3	104427455	104427680	+	0	NA	Intergenic	PB1|SINE|Alu	84351	NM_001310698	269473	Mm.34855	NM_001025067	ENSMUSG00000032913	Lrig2	4632419I10Rik|BB096938|LIG-2	leucine-rich repeats and immunoglobulin-like domains 2	protein-coding
upeaks-21329	chr18	42685847	42686051	+	0	NA	intron (NR_073583, intron 6 of 8)	intron (NR_073583, intron 6 of 8)	-106297	NM_181543	240239	Mm.186779	NM_181543	ENSMUSG00000042816	Gpr151	C130082O03Rik|GalRL|PGR7|nGPCR-2037	G protein-coupled receptor 151	protein-coding
upeaks-6672	chr11	47341519	47341723	+	0	NA	intron (NM_011891, intron 2 of 7)	RSINE1|SINE|B4	37681	NM_011891	24052	Mm.338890	NM_011891	ENSMUSG00000020354	Sgcd	35kDa|delta-SG	sarcoglycan, delta (dystrophin-associated glycoprotein)	protein-coding
upeaks-1619	chr1	119071270	119071615	+	0	NA	Intergenic	Intergenic	-17823	NM_001081125	14633	Mm.273292	NM_001081125	ENSMUSG00000048402	Gli2	-	GLI-Kruppel family member GLI2	protein-coding
upeaks-22137	chr18	82871106	82871340	+	0	NA	Intergenic	Intergenic	15326	NR_125720	73985	Mm.399211	NR_125720	ENSMUSG00000097738	4930445N18Rik	3010027C24Rik	RIKEN cDNA 4930445N18 gene	ncRNA
upeaks-4417	chr10	70114067	70114373	+	0	NA	intron (NM_001111121, intron 1 of 8)	intron (NM_001111121, intron 1 of 8)	17099	NM_001111121	76551	Mm.281741	NM_001111121	ENSMUSG00000048701	Ccdc6	2810012H18Rik|AA536681|AA960498|AW061011	coiled-coil domain containing 6	protein-coding
upeaks-34031	chr5	35634205	35634409	+	0	NA	Intergenic	Intergenic	45473	NM_030127	78558	Mm.274255	NM_030127	ENSMUSG00000029096	Htra3	2210021K23Rik|9530081K03Rik|Prsp|Tasp	HtrA serine peptidase 3	protein-coding
upeaks-40261	chr7	54980678	54981044	+	0	NA	intron (NM_178705, intron 1 of 11)	intron (NM_178705, intron 1 of 11)	145616	NM_178705	233271	Mm.387344	NM_178705	ENSMUSG00000063297	Luzp2	9330154K17Rik|D130073E01	leucine zipper protein 2	protein-coding
upeaks-14840	chr14	101477343	101477686	+	0	NA	intron (NM_001081278, intron 9 of 18)	intron (NM_001081278, intron 9 of 18)	131677	NM_001081278	210789	Mm.320639	NM_173380	ENSMUSG00000033083	Tbc1d4	5930406J04Rik|A930035N22|AV295684|As160	TBC1 domain family, member 4	protein-coding
upeaks-33592	chr5	9628691	9628890	+	0	NA	intron (NM_181850, intron 1 of 5)	intron (NM_181850, intron 1 of 5)	96562	NM_181850	108069	Mm.318966	NM_181850	ENSMUSG00000003974	Grm3	0710001G23Rik|Gprc1c|mGlu3|mGluR3	glutamate receptor, metabotropic 3	protein-coding
upeaks-48387	chrX	169750569	169750768	+	0	NA	intron (NM_010797, intron 1 of 9)	intron (NM_010797, intron 1 of 9)	28967	NR_003635	66747	Mm.34441	NM_025743	ENSMUSG00000055357	4933400A11Rik	-	capping protein (actin filament) muscle Z-line, alpha 1 pseudogene	pseudo
upeaks-7964	chr11	90722942	90723253	+	0	NA	Intergenic	Intergenic	-35496	NM_028011	71943	Mm.167868	NM_028011	ENSMUSG00000020541	Tom1l1	2310045L10Rik|C80573|Srcasm	target of myb1-like 1 (chicken)	protein-coding
upeaks-16234	chr15	78088714	78088950	+	0	NA	intron (NM_007583, intron 1 of 3)	PB1D11|SINE|Alu	30448	NM_007583	12300	Mm.277338	NM_007583	ENSMUSG00000019146	Cacng2	AW060990|B230105C07Rik|B930041E13Rik|stargazer|stargazin|stg|wag|waggler	calcium channel, voltage-dependent, gamma subunit 2	protein-coding
upeaks-16349	chr15	80489728	80489938	+	0	NA	intron (NM_001163189, intron 4 of 5)	intron (NM_001163189, intron 4 of 5)	70637	NM_001163189	383075	Mm.297626	NM_001163189	ENSMUSG00000050439	Enthd1	Gm1242|Gm86	ENTH domain containing 1	protein-coding
upeaks-31249	chr4	65235586	65235804	+	0	NA	intron (NM_021362, intron 8 of 21)	intron (NM_021362, intron 8 of 21)	111521	NM_021362	18491	Mm.317854	NM_021362	ENSMUSG00000028370	Pappa	8430414N03Rik|IGFBP-4ase|PAG1|PAPP-A	pregnancy-associated plasma protein A	protein-coding
upeaks-21895	chr18	73948635	73948978	+	0	NA	intron (NM_172632, intron 2 of 5)	intron (NM_172632, intron 2 of 5)	-69101	NR_045390	77855	Mm.410760	NR_045390	ENSMUSG00000090263	D730045A05Rik	-	RIKEN cDNA D730045A05 gene	ncRNA
upeaks-4198	chr10	59578608	59578866	+	0	NA	intron (NM_001033259, intron 1 of 7)	intron (NM_001033259, intron 1 of 7)	37955	NM_001033259	215999	Mm.296470	NM_001033259	ENSMUSG00000009647	Mcu	2010012O16Rik|AV064928|C10orf42|Ccdc109a|D130073L02Rik|Gm64	mitochondrial calcium uniporter	protein-coding
upeaks-36131	chr5	141371985	141372184	+	0	NA	intron (NM_177879, intron 1 of 44)	intron (NM_177879, intron 1 of 44)	130550	NM_177879	330222	Mm.151931	NM_177879	ENSMUSG00000039683	Sdk1	5330440E10|6720466O15Rik	sidekick cell adhesion molecule 1	protein-coding
upeaks-34298	chr5	53520073	53520547	+	0	NA	Intergenic	Intergenic	-35469	NM_001080928	19664	Mm.209292	NM_009035	ENSMUSG00000039191	Rbpj	AI843960|CBF1|Igkjrb|Igkrsbp|RBP-J|RBP-J kappa|RBP-Jkappa|RBPjk|Rbpsuh	recombination signal binding protein for immunoglobulin kappa J region	protein-coding
upeaks-9452	chr12	27127129	27127330	+	0	NA	Intergenic	Eulor6E|DNA?|DNA?	-12234	NR_045052	100504347	Mm.130500	NR_045052		Gm20187	-	predicted gene, 20187	ncRNA
upeaks-3634	chr10	21936597	21936857	+	0	NA	intron (NM_001161845, intron 2 of 13)	ID_B1|SINE|B4	-41945	NM_001161847	20393	Mm.28405	NM_011361	ENSMUSG00000019970	Sgk1	Sgk	serum/glucocorticoid regulated kinase 1	protein-coding
upeaks-29660	chr3	129004139	129004483	+	0	NA	Intergenic	Intergenic	-195567	NM_001286942	18741	Mm.246804	NM_011098	ENSMUSG00000028023	Pitx2	9430085M16Rik|Brx1|Brx1b|Munc30|Otlx2|Ptx2|Rieg	paired-like homeodomain transcription factor 2	protein-coding
upeaks-1417	chr1	93667813	93668101	+	0	NA	Intergenic	Intergenic	-17618	NM_016778	51800	Mm.3295	NM_016778	ENSMUSG00000026278	Bok	matador|mtd	BCL2-related ovarian killer	protein-coding
upeaks-27432	chr2	180359140	180359359	+	0	NA	Intergenic	Intergenic	-24570	NM_008093	14464	Mm.388880	NM_008093	ENSMUSG00000015627	Gata5	-	GATA binding protein 5	protein-coding
upeaks-4477	chr10	75173550	75174019	+	0	NA	intron (NM_001081412, intron 16 of 22)	intron (NM_001081412, intron 16 of 22)	-38289	NM_153406	74392	Mm.27716	NM_153406	ENSMUSG00000033444	Specc1l	4930470P14Rik|4932439K10Rik|9530057A13Rik|AI317249|Cytsa|mKIAA0376	sperm antigen with calponin homology and coiled-coil domains 1-like	protein-coding
upeaks-19911	chr17	50727682	50727911	+	0	NA	Intergenic	Intergenic	29115	NM_001297747	12228	Mm.392910	NM_009770	ENSMUSG00000022863	Btg3	ANA|tob5	B cell translocation gene 3	protein-coding
upeaks-14269	chr14	59230424	59230683	+	0	NA	intron (NM_027764, intron 11 of 11)	intron (NM_027764, intron 11 of 11)	29325	NM_027764	71330	Mm.234195	NM_027764	ENSMUSG00000035469	Rcbtb1	5430409I18Rik|AW111883|CLLD7|CLLL7	regulator of chromosome condensation (RCC1) and BTB (POZ) domain containing protein 1	protein-coding
upeaks-41198	chr7	108765559	108765823	+	0	NA	Intergenic	Intergenic	10833	NM_146723	258718	Mm.223152	NM_146723	ENSMUSG00000051200	Olfr513	MOR195-1	olfactory receptor 513	protein-coding
upeaks-39925	chr7	36124896	36125095	+	0	NA	Intergenic	B1F1|SINE|Alu	-322006	NM_177739	668501	Mm.286296	NM_177739	ENSMUSG00000044452	Zfp507	1810022O10Rik|A230056M16Rik|AL024009|AU021817|BB105092|Gm480|Znf507|mKIAA1084	zinc finger protein 507	protein-coding
upeaks-22860	chr19	34753275	34753590	+	0	NA	Intergenic	Intergenic	-6321	NM_172838	240638	Mm.74636	NM_172838	ENSMUSG00000009378	Slc16a12	3230401A21|AW210596	solute carrier family 16 (monocarboxylic acid transporters), member 12	protein-coding
upeaks-31553	chr4	89636694	89637151	+	0	NA	Intergenic	Intergenic	-51276	NM_175647	242523	Mm.130167	NM_175647	ENSMUSG00000043753	Dmrta1	Dmrt4	doublesex and mab-3 related transcription factor like family A1	protein-coding
upeaks-2712	chr1	172148406	172148614	+	0	NA	intron (NM_153555, intron 1 of 13)	CpG	495	NM_153555	98193	Mm.159915	NM_153555	ENSMUSG00000026554	Dcaf8	AA408877|AA433120|AA792214|AU018973|C76055|D1Dau35e|D1Ucla4|H326|Wdr42a	DDB1 and CUL4 associated factor 8	protein-coding
upeaks-30557	chr4	18414808	18415027	+	0	NA	Intergenic	Lx2|LINE|L1	561459	NM_019724	17389	Mm.187315	NM_019724	ENSMUSG00000028226	Mmp16	MT-MMP 3|MT3-MMP|Mt3mmp	matrix metallopeptidase 16	protein-coding
upeaks-15829	chr15	58375276	58375638	+	0	NA	intron (NM_027211, intron 1 of 8)	intron (NM_027211, intron 1 of 8)	13817	NM_027211	69787	Mm.237985	NM_027211		Anxa13	1810034H17Rik|AV055219	annexin A13	protein-coding
upeaks-24763	chr2	65278957	65279329	+	0	NA	Intergenic	Intergenic	-40517	NM_177025	319876	Mm.34159	NM_027225	ENSMUSG00000034903	Cobll1	1810047P18Rik|Coblr1|D430044D16Rik	Cobl-like 1	protein-coding
upeaks-30232	chr3	154269847	154270109	+	0	NA	intron (NM_001081263, intron 21 of 21)	intron (NM_001081263, intron 21 of 21)	60582	NM_010713	16875	Mm.15530	NM_010713	ENSMUSG00000096225	Lhx8	L3|Lhx7	LIM homeobox protein 8	protein-coding
upeaks-26520	chr2	148781839	148782070	+	0	NA	promoter-TSS (NM_030135)	promoter-TSS (NM_030135)	-55	NM_030135	78609	Mm.160102	NM_030135	ENSMUSG00000027444	8030411F24Rik	Cst14	RIKEN cDNA 8030411F24 gene	protein-coding
upeaks-39785	chr7	29441856	29442215	+	0	NA	intron (NM_001081028, intron 2 of 22)	intron (NM_001081028, intron 2 of 22)	63425	NM_001081028	74206	Mm.447042	NM_001081028	ENSMUSG00000030583	Sipa1l3	2610511M17Rik	signal-induced proliferation-associated 1 like 3	protein-coding
upeaks-47009	chr9	110507702	110508140	+	0	NA	intron (NM_010628, intron 12 of 20)	Lx2|LINE|L1	-24676	NM_001081340	235626	Mm.288949	NM_001081340	ENSMUSG00000044791	Setd2	4921524K10Rik|BC031601|KMT3A	SET domain containing 2	protein-coding
upeaks-25804	chr2	120098750	120099183	+	0	NA	intron (NM_133838, intron 4 of 5)	intron (NM_133838, intron 4 of 5)	55609	NM_133838	98878	Mm.132226	NM_133838	ENSMUSG00000027293	Ehd4	2210022F10Rik|AI197390|AI846352|AV006278|Past2	EH-domain containing 4	protein-coding
upeaks-40737	chr7	82890917	82891451	+	0	NA	Intergenic	Intergenic	23851	NM_175366	108797	Mm.306789	NM_175366	ENSMUSG00000057706	Mex3b	4931439A04Rik|M-04814|Rkhd3|mKIAA2009	mex3 RNA binding family member B	protein-coding
upeaks-33494	chr4	156228511	156228746	+	0	NA	promoter-TSS (NM_001008233)	promoter-TSS (NM_001008233)	-86	NM_001008233	231002	Mm.423124	NM_001008233	ENSMUSG00000078485	Plekhn1	BC025458	pleckstrin homology domain containing, family N member 1	protein-coding
upeaks-38789	chr6	132463630	132463897	+	0	NA	Intergenic	(GAATG)n|Simple_repeat|Simple_repeat	-99628	NM_053251	114600	Mm.428480	NM_053251		Gm4736	EG114600|Mp4|Mp6	predicted gene 4736	protein-coding
upeaks-3924	chr10	40737363	40737646	+	0	NA	intron (NM_177793, intron 2 of 4)	intron (NM_177793, intron 2 of 4)	54222	NM_177793	327747	Mm.80407	NM_177793	ENSMUSG00000045555	Mettl24	9030224M15Rik	methyltransferase like 24	protein-coding
upeaks-38234	chr6	112397608	112397854	+	0	NA	Intergenic	MLT1A1|LTR|ERVL-MaLR	-9708	NM_175525	243612	Mm.122653	NM_175525	ENSMUSG00000034387	Ssu2	D630042P16Rik|Fls485|Ssuh2	ssu-2 homolog (C. elegans)	protein-coding
upeaks-45466	chr9	43858209	43858422	+	0	NA	Intergenic	Intergenic	113739	NM_021424	58235	Mm.335096	NM_021424	ENSMUSG00000032012	Nectin1	AI835281|AW549174|Cd111|HIgR|HveC|PRR|PRR1|Pvrl1|nectin-1	nectin cell adhesion molecule 1	protein-coding
upeaks-12555	chr13	80389149	80389490	+	0	NA	Intergenic	L1VL2|LINE|L1	-494103	NM_001042591	105171	Mm.423137	NM_001042591	ENSMUSG00000074794	Arrdc3	AI450344|mKIAA1376	arrestin domain containing 3	protein-coding
upeaks-4945	chr10	89334630	89334862	+	0	NA	Intergenic	Intergenic	-76956	NM_001277188	320091	Mm.236464	NM_178773	ENSMUSG00000035189	Ano4	A330096O15Rik|Gm65|Tmem16d	anoctamin 4	protein-coding
upeaks-20305	chr17	73006258	73006629	+	0	NA	Intergenic	Intergenic	88138	NM_029999	77889	Mm.154109	NM_029999	ENSMUSG00000024063	Lbh	1810009F10Rik|6720416L16Rik	limb-bud and heart	protein-coding
upeaks-2128	chr1	144306288	144306663	+	0	NA	Intergenic	Intergenic	-57371	NM_015811	50778	Mm.103701	NM_015811	ENSMUSG00000026358	Rgs1	BL34	regulator of G-protein signaling 1	protein-coding
upeaks-43120	chr8	61681324	61681549	+	0	NA	intron (NM_001293772, intron 10 of 21)	intron (NM_001293772, intron 10 of 21)	78662	NM_001293773	72333	Mm.29933	NM_001081390	ENSMUSG00000058056	Palld	2410003B16Rik|6030492A02	palladin, cytoskeletal associated protein	protein-coding
upeaks-41382	chr7	115003621	115003898	+	0	NA	Intergenic	Lx2B|LINE|L1	52485	NR_040319	101786	Mm.395157	NR_040317	ENSMUSG00000108379	A730082K24Rik	AU044236	RIKEN cDNA A730082K24 gene	ncRNA
upeaks-6314	chr11	26516154	26516367	+	0	NA	intron (NM_001252447, intron 7 of 11)	intron (NM_001252447, intron 7 of 11)	77660	NM_027260	69922	Mm.285351	NM_027260	ENSMUSG00000064090	Vrk2	2810003O05Rik|AI447698	vaccinia related kinase 2	protein-coding
upeaks-12392	chr13	71330422	71330666	+	0	NA	Intergenic	Intergenic	223455	NR_130325	100316804		NR_130325	ENSMUSG00000080580	Mir466f-4	Mirn466f-4|mmu-mir-466f-4	microRNA 466f-4	ncRNA
upeaks-18296	chr16	76497145	76497351	+	0	NA	Intergenic	Intergenic	-124199	NM_173440	268903	Mm.74711	NM_173440	ENSMUSG00000048490	Nrip1	6030458L20Rik|8430438I05Rik|9630050P12|AA959574|AW456757|RIP140	nuclear receptor interacting protein 1	protein-coding
upeaks-36625	chr6	17947506	17947751	+	0	NA	Intergenic	Intergenic	82817	NM_023653	22413	Mm.33653	NM_023653	ENSMUSG00000010797	Wnt2	2610510E18Rik|Int1l1|Irp|Mirp|Wnt-2|Wnt2a	wingless-type MMTV integration site family, member 2	protein-coding
upeaks-13531	chr14	20766989	20767230	+	0	NA	intron (NM_001039139, intron 5 of 18)	L1MA6|LINE|L1	26979	NM_001039138	12325	Mm.235182	NM_178597	ENSMUSG00000021820	Camk2g	Camkg	calcium/calmodulin-dependent protein kinase II gamma	protein-coding
upeaks-10031	chr12	73794251	73794462	+	0	NA	Intergenic	Intergenic	-106968	NM_001313920	15251	Mm.3879	NM_010431	ENSMUSG00000021109	Hif1a	AA959795|HIF-1-alpha|HIF1-alpha|HIF1alpha|MOP1|bHLHe78	hypoxia inducible factor 1, alpha subunit	protein-coding
upeaks-25528	chr2	107453133	107453447	+	0	NA	Intergenic	Lx|LINE|L1	162701	NM_021275	16492	Mm.142718	NM_021275	ENSMUSG00000042604	Kcna4	Kv1.4	potassium voltage-gated channel, shaker-related subfamily, member 4	protein-coding
upeaks-47376	chr9	123845072	123845550	+	0	NA	intron (NM_148925, intron 1 of 18)	intron (NM_148925, intron 1 of 18)	6350	NM_148925	17281	Mm.252941	NM_148925	ENSMUSG00000025241	Fyco1	2810409M01Rik|Mem2|RUFY3|ZFYVE7	FYVE and coiled-coil domain containing 1	protein-coding
upeaks-3282	chr1	194025089	194025395	+	0	NA	Intergenic	Intergenic	197517	NR_040477	74942	Mm.60689	NR_040477	ENSMUSG00000103692	4930503O07Rik	-	RIKEN cDNA 4930503O07 gene	ncRNA
upeaks-26162	chr2	133586491	133586744	+	0	NA	Intergenic	L1M4a2|LINE|L1	21909	NR_037273	100526500		NR_037273	ENSMUSG00000093338	Mir3090	mmu-mir-3090	microRNA 3090	ncRNA
upeaks-47158	chr9	116368941	116369430	+	0	NA	Intergenic	Intergenic	-193822	NM_009371	21813	Mm.172346	NM_009371	ENSMUSG00000032440	Tgfbr2	1110020H15Rik|AU042018|DNIIR|RIIDN|TBR-II|TbetaR-II|TbetaRII	transforming growth factor, beta receptor II	protein-coding
upeaks-14802	chr14	99340066	99340426	+	0	NA	Intergenic	Intergenic	41555	NM_009769	12224	Mm.30262	NM_009769	ENSMUSG00000005148	Klf5	4930520J07Rik|Bteb2|CKLF|IKLF	Kruppel-like factor 5	protein-coding
upeaks-27639	chr3	15000721	15001043	+	0	NA	intron (NR_040550, intron 3 of 3)	RLTR41A2|LTR|ERV1	29681	NR_040550	77127	Mm.195792	NR_040549	ENSMUSG00000098008	A930001A20Rik	-	RIKEN cDNA A930001A20 gene	ncRNA
upeaks-7533	chr11	77296980	77297199	+	0	NA	intron (NM_177710, intron 1 of 14)	PB1D10|SINE|Alu	-51191	NM_001291190	237860	Mm.440381	NM_177710	ENSMUSG00000037926	Ssh2	SSH-2|SSH-2L|mSSH-2L	slingshot homolog 2 (Drosophila)	protein-coding
upeaks-47074	chr9	112215513	112215732	+	0	NA	intron (NM_001177619, intron 1 of 10)	intron (NM_001177619, intron 1 of 10)	1639	NM_001177617	74100	Mm.297444	NM_028755	ENSMUSG00000032503	Arpp21	0710001E13Rik|AI853636|ARPP-21|D9Bwg1012e|R3hdm3|Tarpp	cyclic AMP-regulated phosphoprotein, 21	protein-coding
upeaks-7437	chr11	74653481	74653696	+	0	NA	intron (NM_001081158, intron 1 of 25)	intron (NM_001081158, intron 1 of 25)	4093	NM_001081158	74148	Mm.214574	NM_001081158	ENSMUSG00000020741	Cluh	1300001I01Rik|Kiaa0664|mKIAA0664	clustered mitochondria (cluA/CLU1) homolog	protein-coding
upeaks-30079	chr3	147144802	147145006	+	0	NA	Intergenic	Intergenic	292537	NM_001302957	70892	Mm.187793	NM_027594	ENSMUSG00000036745	Ttll7	1110049N09Rik|4921517B04Rik|C630030B20|mTTLL7	tubulin tyrosine ligase-like family, member 7	protein-coding
upeaks-39320	chr7	6839974	6840178	+	0	NA	intron (NM_021323, intron 2 of 7)	7SLRNA|srpRNA|srpRNA	36489	NR_037213	100499513		NR_037213	ENSMUSG00000092815	Mir3099	mir-3099|mmu-mir-3099	microRNA 3099	ncRNA
upeaks-18406	chr16	86719205	86719807	+	0	NA	Intergenic	Intergenic	-634679	NM_026366	67768	Mm.296532	NM_026366	ENSMUSG00000044442	N6amt1	5830445C04Rik|Hemk2|Pred28	N-6 adenine-specific DNA methyltransferase 1 (putative)	protein-coding
upeaks-40288	chr7	58788322	58788851	+	0	NA	intron (NM_009728, intron 7 of 20)	intron (NM_009728, intron 7 of 20)	130384	NM_009728	11982	Mm.135129	NM_009728	ENSMUSG00000025324	Atp10a	Atp10c|pfatp	ATPase, class V, type 10A	protein-coding
upeaks-482	chr1	43006016	43006586	+	0	NA	intron (NM_053107, intron 1 of 1)	intron (NM_053107, intron 1 of 1)	53429	NM_053107	93690	Mm.444976	NM_053107	ENSMUSG00000041907	Gpr45	9230112G11Rik|AW046772	G protein-coupled receptor 45	protein-coding
upeaks-4386	chr10	68670255	68670454	+	0	NA	Intergenic	Intergenic	-53392	NM_177794	327766	Mm.2479	NM_177794	ENSMUSG00000060044	Tmem26	3230401A06|AI195372	transmembrane protein 26	protein-coding
upeaks-48095	chrX	136234893	136235246	+	0	NA	Intergenic	MT2A|LTR|ERVL	-10011	NM_011712	22381	Mm.512	NM_011712	ENSMUSG00000042712	Wbp5	AL024233|Tceal9	WW domain binding protein 5	protein-coding
upeaks-306	chr1	33245968	33246167	+	0	NA	Intergenic	ID_B1|SINE|B4	423727	NM_008922	19076	Mm.27705	NM_008922	ENSMUSG00000026134	Prim2	AI323589	DNA primase, p58 subunit	protein-coding
upeaks-12598	chr13	83046509	83047026	+	0	NA	Intergenic	LTR33|LTR|ERVL	-348434	NR_039537	100628621		NR_039537	ENSMUSG00000106655	Mir3961	mmu-mir-3961	microRNA 3961	ncRNA
upeaks-29380	chr3	115815187	115815495	+	0	NA	Intergenic	Intergenic	72718	NR_027894	68161	Mm.392043	NR_015487	ENSMUSG00000054426	A930005H10Rik	-	RIKEN cDNA A930005H10 gene	ncRNA
upeaks-18511	chr16	90995039	90995329	+	0	NA	intron (NM_001164483, intron 2 of 31)	intron (NM_001164483, intron 2 of 31)	15911	NM_001045515	104015	Mm.187079	NM_001045515	ENSMUSG00000022973	Synj1	A930006D20Rik|AA675315|mKIAA0910	synaptojanin 1	protein-coding
upeaks-23603	chr2	9913084	9913332	+	0	NA	Intergenic	Intergenic	-23668	NR_040511	77682	Mm.488621	NR_040511	ENSMUSG00000079602	9230102O04Rik	-	RIKEN cDNA 9230102O04 gene	ncRNA
upeaks-31048	chr4	54470076	54470506	+	0	NA	Intergenic	Intergenic	-477654	NM_172867	242466	Mm.102904	NM_172867	ENSMUSG00000060206	Zfp462	6030417H05|9430078C22Rik|Gt4-2|Zfpip	zinc finger protein 462	protein-coding
upeaks-42480	chr8	18776248	18776597	+	0	NA	intron (NM_173189, intron 12 of 13)	intron (NM_173189, intron 12 of 13)	-34860	NM_007426	11601	Mm.439874	NM_007426	ENSMUSG00000031465	Angpt2	Agpt2|Ang-2|Ang2	angiopoietin 2	protein-coding
upeaks-41531	chr7	121186231	121186627	+	0	NA	Intergenic	Intergenic	102991	NM_139310	246190	Mm.221073	NM_139310	ENSMUSG00000034990	Otoa	-	otoancorin	protein-coding
upeaks-25479	chr2	105476344	105476574	+	0	NA	Intergenic	RMER1B|Other|Other	-77140	NM_009037	19672	Mm.4876	NM_009037	ENSMUSG00000005973	Rcn1	Rcn	reticulocalbin 1	protein-coding
upeaks-44360	chr8	118182789	118183172	+	0	NA	Intergenic	Intergenic	-100631	NM_019707	12554	Mm.334841	NM_019707	ENSMUSG00000031841	Cdh13	4932416G01Rik|Cdht|Tcad	cadherin 13	protein-coding
upeaks-20721	chr17	94325396	94325971	+	0	NA	Intergenic	Intergenic	424209	NM_176917	76781	Mm.139146	NM_176917	ENSMUSG00000055660	Mettl4	2410198H06Rik|A730091E08Rik|AV296509|HsT661	methyltransferase like 4	protein-coding
upeaks-17601	chr16	29788055	29788254	+	0	NA	Intergenic	Intergenic	190970	NR_037689	328657	Mm.425982	NM_001033403		Gm1968	-	predicted gene 1968	ncRNA
upeaks-32101	chr4	117655579	117655874	+	0	NA	intron (NM_001285901, intron 7 of 7)	intron (NM_001285901, intron 7 of 7)	26499	NM_023178	66233	Mm.29142	NM_023178	ENSMUSG00000009640	Dmap1	1500016M21Rik|DNMAP1|DNMTAP1|Dmtap1|mKIAA1425	DNA methyltransferase 1-associated protein 1	protein-coding
upeaks-12688	chr13	91025047	91025249	+	0	NA	intron (NM_025770, intron 4 of 7)	intron (NM_025770, intron 4 of 7)	102026	NM_024175	66475	Mm.306302	NM_024175	ENSMUSG00000049517	Rps23	2410044J15Rik	ribosomal protein S23	protein-coding
upeaks-9330	chr12	16789782	16790108	+	0	NA	intron (NM_015764, intron 1 of 34)	intron (NM_015764, intron 1 of 34)	10941	NM_015764	268527	Mm.428062	NM_015764	ENSMUSG00000036523	Greb1	5730583K22Rik|9130004E13|AF180470|AU023194|mKIAA0575	gene regulated by estrogen in breast cancer protein	protein-coding
upeaks-30467	chr4	10792717	10792916	+	0	NA	intron (NR_045185, intron 1 of 4)	intron (NR_045185, intron 1 of 4)	4986	NR_045185	73624	Mm.67392	NR_045185	ENSMUSG00000086080	1700123O12Rik	-	RIKEN cDNA 1700123O12 gene	ncRNA
upeaks-20260	chr17	71248980	71249252	+	0	NA	3' UTR (NM_022882, exon 20 of 20)	3' UTR (NM_022882, exon 20 of 20)	44462	NM_001164885	64898	Mm.227924	NM_022882	ENSMUSG00000024052	Lpin2	2610511G02Rik|AI481352|AW742896	lipin 2	protein-coding
upeaks-42100	chr7	142481830	142482145	+	0	NA	intron (NM_001271523, intron 1 of 10)	intron (NM_001271523, intron 1 of 10)	4974	NM_001271523	16985	Mm.234003	NM_019391	ENSMUSG00000018819	Lsp1	Lsp-1|WP34|p50|pp52	lymphocyte specific 1	protein-coding
upeaks-26141	chr2	133158236	133158509	+	0	NA	Intergenic	Intergenic	-212336	NM_198029	241639	Mm.209784	NM_198029	ENSMUSG00000027356	Fermt1	5830467P10Rik|Kindlin-1	fermitin family member 1	protein-coding
upeaks-41237	chr7	109852900	109853233	+	0	NA	intron (NM_020052, intron 3 of 21)	L2c|LINE|L2	12613	NM_020052	56788	Mm.40447	NM_020052	ENSMUSG00000007279	Scube2	4932442O19Rik|Cegf1|Cegp1	signal peptide, CUB domain, EGF-like 2	protein-coding
upeaks-37521	chr6	72699542	72699821	+	0	NA	intron (NM_001079822, intron 3 of 12)	intron (NM_001079822, intron 3 of 12)	69850	NR_040421	100038714	Mm.321330	NR_040421		Gm15401	ENSMUSG00000072999|OTTMUSG00000021199	predicted gene 15401	ncRNA
upeaks-13200	chr13	116259689	116259891	+	0	NA	Intergenic	Intergenic	49898	NM_021459	16392	Mm.42242	NM_021459	ENSMUSG00000042258	Isl1	-	ISL1 transcription factor, LIM/homeodomain	protein-coding
upeaks-23415	chr19	58088502	58088803	+	0	NA	intron (NM_181415, intron 28 of 28)	Lx8|LINE|L1	37485	NR_049196	100885835		NR_049196	ENSMUSG00000093757	Mir5623	Gm26068|mir-5623|mmu-mir-5623	microRNA 5623	ncRNA
upeaks-3931	chr10	41040657	41040856	+	0	NA	Intergenic	(GGCTG)n|Simple_repeat|Simple_repeat	30828	NM_199058	140741	Mm.290693	NM_199058	ENSMUSG00000046922	Gpr6	AI852874|Gm233	G protein-coupled receptor 6	protein-coding
upeaks-12425	chr13	73298573	73299199	+	0	NA	Intergenic	Intergenic	29596	NR_033306	407785	Mm.29897	NM_010888	ENSMUSG00000021606	Ndufs6	BC059730|IP13	NADH dehydrogenase (ubiquinone) Fe-S protein 6	protein-coding
upeaks-23423	chr19	58537424	58537623	+	0	NA	intron (NM_029372, intron 7 of 8)	intron (NM_029372, intron 7 of 8)	25521	NM_029372	75645	Mm.159542	NM_029372	ENSMUSG00000025090	Ccdc172	1700011F14Rik	coiled-coil domain containing 172	protein-coding
upeaks-103	chr1	12644701	12644944	+	0	NA	Intergenic	(GAATG)n|Simple_repeat|Simple_repeat	-22741	NR_045297	329096	Mm.417782	NR_045297	ENSMUSG00000097171	Gm17644	4932411L15	predicted gene, 17644	ncRNA
upeaks-44976	chr9	15870078	15870374	+	0	NA	intron (NM_145712, intron 1 of 1)	intron (NM_145712, intron 1 of 1)	4330	NM_145712	244701	Mm.222631	NM_145712	ENSMUSG00000050901	Mtnr1b	Mel-1B-R|Mel1b|Mt2	melatonin receptor 1B	protein-coding
upeaks-16723	chr15	93859124	93859359	+	0	NA	Intergenic	Intergenic	67870	NR_045737	77248	Mm.410768	NR_045737		9430014N10Rik	-	RIKEN cDNA 9430014N10 gene	ncRNA
upeaks-30147	chr3	151891794	151892459	+	0	NA	Intergenic	Intergenic	-54598	NM_008966	19220	Mm.331442	NM_008966	ENSMUSG00000028036	Ptgfr	AI957154|PGF|fp	prostaglandin F receptor	protein-coding
upeaks-25181	chr2	89757165	89757430	+	0	NA	Intergenic	Lx3_Mus|LINE|L1	-4471	NM_146373	258370	Mm.480193	NM_146373	ENSMUSG00000075075	Olfr1253	MOR231-18|MOR231-19P|Olfr1253-ps1|Olfr1559-ps1	olfactory receptor 1253	protein-coding
upeaks-47131	chr9	115029314	115029890	+	0	NA	Intergenic	Intergenic	-37677	NM_148958	74486	Mm.458474	NM_148958	ENSMUSG00000040875	Osbpl10	4933433D06Rik|C820004B04Rik|OPR-10|ORP-10	oxysterol binding protein-like 10	protein-coding
upeaks-46348	chr9	79518586	79519100	+	0	NA	intron (NR_045336, intron 1 of 2)	intron (NR_045336, intron 1 of 2)	459	NR_045336	100038575	Mm.367838	NR_045336	ENSMUSG00000111765	Gm10635	ENSMUSG00000074174	predicted gene 10635	ncRNA
upeaks-10561	chr12	99964378	99964606	+	0	NA	promoter-TSS (NM_001164426)	promoter-TSS (NM_001164426)	-7	NM_001164427	217826	Mm.312335	NM_146037	ENSMUSG00000045404	Kcnk13	BB085247|F730021E22Rik|Gm1570|Gm1685	potassium channel, subfamily K, member 13	protein-coding
upeaks-29841	chr3	136707600	136707908	+	0	NA	intron (NM_008913, intron 1 of 13)	intron (NM_008913, intron 1 of 13)	37688	NM_008913	19055	Mm.331389	NM_008913	ENSMUSG00000028161	Ppp3ca	2900074D19Rik|CN|Caln|Calna|CnA	protein phosphatase 3, catalytic subunit, alpha isoform	protein-coding
upeaks-27586	chr3	9547308	9547553	+	0	NA	intron (NM_133218, intron 2 of 8)	intron (NM_133218, intron 2 of 8)	62655	NM_133218	170753	Mm.212908	NM_133218	ENSMUSG00000040209	Zfp704	C030026M03|C030034L19Rik|Gig1|Znf704	zinc finger protein 704	protein-coding
upeaks-16684	chr15	92543169	92543661	+	0	NA	intron (NM_001164593, intron 3 of 9)	L2|LINE|L2	-53694	NM_001164594	239618	Mm.309826	NM_001164593	ENSMUSG00000036218	Pdzrn4	1110017D07Rik|LNX4|SAMCAP3L|mKIAA3027	PDZ domain containing RING finger 4	protein-coding
upeaks-18751	chr17	4319267	4319466	+	0	NA	Intergenic	MER58B|DNA|hAT-Charlie	-197264	NR_045462	78043	Mm.398313	NR_045462		4930548J01Rik	1700113K09Rik	RIKEN cDNA 4930548J01 gene	ncRNA
upeaks-565	chr1	51584844	51585272	+	0	NA	Intergenic	ORR1F|LTR|ERVL-MaLR	-106659	NM_001310549	109019	Mm.196290	NM_028696	ENSMUSG00000026107	Nabp1	4930434H03Rik|4930442A21Rik|4930488J04Rik|4933440J18Rik|5830411E10Rik|AI852561|Nbp1|Obfc2a|Ssb2	nucleic acid binding protein 1	protein-coding
upeaks-14751	chr14	87580968	87581194	+	0	NA	Intergenic	MER5A1|DNA|hAT-Charlie	164498	NM_172605	219249	Mm.35168	NM_172605	ENSMUSG00000022019	Tdrd3	4732418C03Rik|6720468N18	tudor domain containing 3	protein-coding
upeaks-27392	chr2	179565508	179565895	+	0	NA	intron (NM_001316723, intron 2 of 5)	intron (NM_001316723, intron 2 of 5)	123270	NM_001316723	12561	Mm.184711	NM_009867	ENSMUSG00000000305	Cdh4	AW120700|R-CAD|R-Cadh|Rcad	cadherin 4	protein-coding
upeaks-12356	chr13	69230061	69230786	+	0	NA	Intergenic	Intergenic	-230882	NM_153534	210044	Mm.390617	NM_153534	ENSMUSG00000021536	Adcy2	mKIAA1060	adenylate cyclase 2	protein-coding
upeaks-6290	chr11	24613502	24613999	+	0	NA	Intergenic	Intergenic	116972	NR_033491	100038617	Mm.387376	NR_033491	ENSMUSG00000073103	Gm10466	ENSMUSG00000073103	predicted gene 10466	ncRNA
upeaks-15710	chr15	51503413	51503704	+	0	NA	Intergenic	Intergenic	-107948	NR_045092	100502643	Mm.131987	NR_045092		Gm19303	-	predicted gene, 19303	ncRNA
upeaks-33078	chr4	144992444	144992644	+	0	NA	intron (NM_001276502, intron 66 of 68)	intron (NM_001276502, intron 66 of 68)	99407	NM_011303	20148	Mm.14063	NM_011303	ENSMUSG00000066026	Dhrs3	Rsdr1|retSDR1	dehydrogenase/reductase (SDR family) member 3	protein-coding
upeaks-13210	chr13	116443630	116443829	+	0	NA	Intergenic	Intergenic	-134041	NM_021459	16392	Mm.42242	NM_021459	ENSMUSG00000042258	Isl1	-	ISL1 transcription factor, LIM/homeodomain	protein-coding
upeaks-8960	chr11	118233360	118233584	+	0	NA	intron (NM_001112699, intron 1 of 12)	B1_Mur2|SINE|Alu	15120	NM_011180	19157	Mm.86413	NM_011180	ENSMUSG00000017132	Cyth1	CLM1|CTH-1|CYTIP|Pscd1	cytohesin 1	protein-coding
upeaks-39029	chr6	142823351	142823675	+	0	NA	3' UTR (NM_011374, exon 5 of 5)	3' UTR (NM_011374, exon 5 of 5)	9282	NR_045707	665037	Mm.401493	NR_045707	ENSMUSG00000072683	Gm7457	EG665037|ENSMUSG00000072683	predicted gene 7457	ncRNA
upeaks-1121	chr1	83218402	83218601	+	0	NA	Intergenic	Intergenic	58739	NR_027636	71227	Mm.256482	NM_027725	ENSMUSG00000053161	Daw1	4930563E19Rik|4933429D11Rik|Wdr69|b2b1116Clo|b2b1584Clo	dynein assembly factor with WDR repeat domains 1	protein-coding
upeaks-17182	chr16	5515336	5515535	+	0	NA	Intergenic	PB1|SINE|Alu	-259479	NM_027446	70511	Mm.45780	NM_027446	ENSMUSG00000022544	Eef2kmt	5730409G15Rik|Fam86|Fam86a|eEF2-KMT	eukaryotic elongation factor 2 lysine methyltransferase	protein-coding
upeaks-2204	chr1	152682771	152682998	+	0	NA	intron (NM_001346117, intron 1 of 18)	intron (NM_001346117, intron 1 of 18)	-57667	NM_016846	19731	Mm.245270	NM_016846	ENSMUSG00000026482	Rgl1	Rgl|mKIAA0959	ral guanine nucleotide dissociation stimulator,-like 1	protein-coding
upeaks-34	chr1	6132999	6133366	+	0	NA	Intergenic	ERVB4_1B-LTR_MM|LTR|ERVK	-81480	NM_009826	12421	Mm.293811	NM_009826	ENSMUSG00000025907	Rb1cc1	2900055E04Rik|5930404L04Rik|Cc1|FIP200|LaXp180	RB1-inducible coiled-coil 1	protein-coding
upeaks-22621	chr19	16141889	16142212	+	0	NA	intron (NM_008139, intron 1 of 6)	intron (NM_008139, intron 1 of 6)	9219	NM_008139	14682	Mm.439701	NM_008139	ENSMUSG00000024639	Gnaq	1110005L02Rik|6230401I02Rik|AA408290|AW060788|Dsk1|Dsk10|Galphaq|Gq|GqI	guanine nucleotide binding protein, alpha q polypeptide	protein-coding
upeaks-567	chr1	51594017	51594350	+	0	NA	Intergenic	Intergenic	-115784	NM_001310549	109019	Mm.196290	NM_028696	ENSMUSG00000026107	Nabp1	4930434H03Rik|4930442A21Rik|4930488J04Rik|4933440J18Rik|5830411E10Rik|AI852561|Nbp1|Obfc2a|Ssb2	nucleic acid binding protein 1	protein-coding
upeaks-9283	chr12	12986762	12987128	+	0	NA	Intergenic	HAL1|LINE|L1	-45109	NM_008709	18109	Mm.16469	NM_008709	ENSMUSG00000037169	Mycn	N-myc|Nmyc|Nmyc-1|Nmyc1|bHLHe37|c-nmyc	v-myc avian myelocytomatosis viral related oncogene, neuroblastoma derived	protein-coding
upeaks-34806	chr5	96037813	96038116	+	0	NA	Intergenic	Intergenic	81025	NM_018866	55985	Mm.10116	NM_018866	ENSMUSG00000023078	Cxcl13	4631412M08Rik|ANGIE2|Angie|BCA-1|BLC|BLR1L|Scyb13	chemokine (C-X-C motif) ligand 13	protein-coding
upeaks-18103	chr16	56796794	56797000	+	0	NA	Intergenic	Intergenic	-1039	NM_172825	239853	Mm.258979	NM_172825	ENSMUSG00000022755	Adgrg7	9130020O16Rik|Gpr128	adhesion G protein-coupled receptor G7	protein-coding
upeaks-818	chr1	67465587	67465863	+	0	NA	Intergenic	Intergenic	342698	NM_001080809	227231	Mm.343942	NM_001080809	ENSMUSG00000025991	Cps1	4732433M03Rik|CPS|D1Ucla3	carbamoyl-phosphate synthetase 1	protein-coding
upeaks-21098	chr18	32542522	32542721	+	0	NA	intron (NM_001048207, intron 1 of 2)	intron (NM_001048207, intron 1 of 2)	17413	NM_001347610	71683	Mm.292145	NM_027863	ENSMUSG00000090523	Gypc	0610037F22Rik|Cd236r	glycophorin C	protein-coding
upeaks-22802	chr19	30882601	30882910	+	0	NA	intron (NM_011160, intron 5 of 17)	intron (NM_011160, intron 5 of 17)	48207	NR_033643	625995	Mm.454508	NR_033643		Gm6642	EG625995	ubiquitin-like 5 pseudogene	pseudo
upeaks-1715	chr1	126578160	126578540	+	0	NA	intron (NM_001081756, intron 2 of 16)	intron (NM_001081756, intron 2 of 16)	-85423	NM_172484	210356	Mm.377234	NM_172484	ENSMUSG00000049690	Nckap5	8430408F21|D130011D22Rik|E030049G20Rik|Erih1|Erih2|Gm1548|Nap5	NCK-associated protein 5	protein-coding
upeaks-11002	chr12	117450127	117450493	+	0	NA	Intergenic	Intergenic	-66169	NM_175930	217944	Mm.227642	NM_175930	ENSMUSG00000041992	Rapgef5	4932413M22|C86120|D030051B22Rik|GFR|Mrgef|mKIAA0277|mmr-gef	Rap guanine nucleotide exchange factor (GEF) 5	protein-coding
upeaks-40510	chr7	73141129	73141440	+	0	NA	Intergenic	Intergenic	-39216	NR_046024	625243	Mm.261798	NR_046024	ENSMUSG00000108383	Gm6567	-	predicted gene 6567	ncRNA
upeaks-12537	chr13	78679355	78679894	+	0	NA	Intergenic	Intergenic	-480751	NM_010151	13865	Mm.439653	NM_010151	ENSMUSG00000069171	Nr2f1	COUP-TF1|COUP-TFI|COUPTFA|EAR-3|EAR3|Erbal3|SVP44|Tcfcoup1	nuclear receptor subfamily 2, group F, member 1	protein-coding
upeaks-31351	chr4	77743348	77743866	+	0	NA	intron (NM_011211, intron 2 of 39)	intron (NM_011211, intron 2 of 39)	468288	NM_011211	19266	Mm.184021	NM_011211	ENSMUSG00000028399	Ptprd	1110002J03Rik|3000002J10Rik|B230219D21Rik|R-PTP-delta	protein tyrosine phosphatase, receptor type, D	protein-coding
upeaks-34709	chr5	90603309	90603830	+	0	NA	3' UTR (NM_028478, exon 11 of 11)	3' UTR (NM_028478, exon 11 of 11)	36958	NM_001310656	73246	Mm.30172	NM_028478	ENSMUSG00000029370	Rassf6	1600016B17Rik	Ras association (RalGDS/AF-6) domain family member 6	protein-coding
upeaks-343	chr1	34519208	34519652	+	0	NA	Intergenic	Intergenic	-16218	NM_007685	12627	Mm.2531	NM_007685	ENSMUSG00000026124	Cfc1	AV265756|b2b970Clo|cryptic	cripto, FRL-1, cryptic family 1	protein-coding
upeaks-9610	chr12	36136020	36136263	+	0	NA	intron (NM_025840, intron 1 of 11)	B1F|SINE|Alu	20684	NM_025840	66912	Mm.288669	NM_025840	ENSMUSG00000020547	Bzw2	1110001I24Rik|Bdm2|HSPC028	basic leucine zipper and W2 domains 2	protein-coding
upeaks-45120	chr9	24787899	24788137	+	0	NA	Intergenic	Intergenic	-13715	NM_194263	57246	Mm.31452	NM_020496	ENSMUSG00000031965	Tbx20	9430010M06Rik|AL022859|Tbx12	T-box 20	protein-coding
upeaks-12917	chr13	101780781	101780990	+	0	NA	Intergenic	Intergenic	-12668	NM_001077495	18708	Mm.259333	NM_001024955	ENSMUSG00000041417	Pik3r1	PI3K|p50alpha|p55alpha|p85alpha	phosphatidylinositol 3-kinase, regulatory subunit, polypeptide 1 (p85 alpha)	protein-coding
upeaks-24735	chr2	63574030	63574349	+	0	NA	Intergenic	Intergenic	-389902	NM_133207	170738	Mm.242532	NM_133207	ENSMUSG00000059742	Kcnh7	9330137I11Rik|Kv11.3|erg3	potassium voltage-gated channel, subfamily H (eag-related), member 7	protein-coding
upeaks-22091	chr18	81014097	81014347	+	0	NA	Intergenic	Intergenic	-27644	NM_178280	20689	Mm.215917	NM_178280	ENSMUSG00000024565	Sall3	B130022O04Rik|Msal|Msal-1|Sal|Salt|Spalt	sal-like 3 (Drosophila)	protein-coding
upeaks-3490	chr10	13102391	13102631	+	0	NA	intron (NM_009538, intron 1 of 5)	intron (NM_009538, intron 1 of 5)	11666	NR_131912	338438		NR_131912		Hymai	-	hydatidiform mole associated and imprinted transcript	ncRNA
upeaks-15146	chr14	122068777	122069470	+	0	NA	Intergenic	Intergenic	34449	NM_001037744	223262	Mm.297637	NM_001037744	ENSMUSG00000071229	Timm8a2	-	translocase of inner mitochondrial membrane 8A2	protein-coding
upeaks-21678	chr18	62786795	62787001	+	0	NA	Intergenic	MLTR14|LTR|ERV1	-30551	NR_037693	78449	Mm.262195	NR_037693	ENSMUSG00000041789	2700046A07Rik	A330042I05Rik	RIKEN cDNA 2700046A07 gene	ncRNA
upeaks-42474	chr8	18694122	18694392	+	0	NA	intron (NM_007426, intron 8 of 8)	intron (NM_007426, intron 8 of 8)	47305	NM_007426	11601	Mm.439874	NM_007426	ENSMUSG00000031465	Angpt2	Agpt2|Ang-2|Ang2	angiopoietin 2	protein-coding
upeaks-2657	chr1	170652062	170652329	+	0	NA	intron (NM_177068, intron 3 of 7)	intron (NM_177068, intron 3 of 7)	7663	NM_177068	320078	Mm.287131	NM_177068	ENSMUSG00000038463	Olfml2b	1110018N05Rik|4832415H08Rik|AI467542	olfactomedin-like 2B	protein-coding
upeaks-38193	chr6	108306416	108306675	+	0	NA	intron (NM_010585, intron 4 of 61)	intron (NM_010585, intron 4 of 61)	93449	NM_010585	16438	Mm.227912	NM_010585	ENSMUSG00000030102	Itpr1	D6Pas2|ENSMUSG00000072853|Gm10429|IP3R 1|IP3R1|InsP3R|Ip3r|Itpr-1|P400|Pcp-1|Pcp1|insP3R1|opt|wblo	inositol 1,4,5-trisphosphate receptor 1	protein-coding
upeaks-32404	chr4	127193439	127193642	+	0	NA	intron (NM_001302081, intron 2 of 11)	intron (NM_001302081, intron 2 of 11)	20660	NM_001302081	242667	Mm.331885	NM_198618	ENSMUSG00000042388	Dlgap3	BC058433|DAP-3|DAP3|Prpl8|Sapap3	discs, large (Drosophila) homolog-associated protein 3	protein-coding
upeaks-34190	chr5	45328465	45328666	+	0	NA	intron (NR_131933, intron 2 of 5)	L1MA4A|LINE|L1	95835	NR_131933	52401	Mm.33854	NR_131933	ENSMUSG00000029092	D5Ertd615e	4930435H24Rik	DNA segment, Chr 5, ERATO Doi 615, expressed	ncRNA
upeaks-14748	chr14	87566312	87566669	+	0	NA	Intergenic	Intergenic	149907	NM_172605	219249	Mm.35168	NM_172605	ENSMUSG00000022019	Tdrd3	4732418C03Rik|6720468N18	tudor domain containing 3	protein-coding
upeaks-27393	chr2	179569642	179569895	+	0	NA	intron (NM_001316723, intron 2 of 5)	intron (NM_001316723, intron 2 of 5)	127337	NM_001316723	12561	Mm.184711	NM_009867	ENSMUSG00000000305	Cdh4	AW120700|R-CAD|R-Cadh|Rcad	cadherin 4	protein-coding
upeaks-29055	chr3	101346091	101346330	+	0	NA	Intergenic	PB1|SINE|Alu	-30915	NM_207205	78908	Mm.257997	NM_207205	ENSMUSG00000042035	Igsf3	1700016K10Rik|2810035F16Rik|4833439O17Rik|mKIAA0466	immunoglobulin superfamily, member 3	protein-coding
upeaks-6240	chr11	22538311	22538560	+	0	NA	Intergenic	Lx|LINE|L1	26152	NM_153596	103765	Mm.221274	NM_153596	ENSMUSG00000049904	Tmem17	AI503894|AW049890	transmembrane protein 17	protein-coding
upeaks-6735	chr11	50508889	50509122	+	0	NA	Intergenic	PB1|SINE|Alu	-77894	NM_172557	216724	Mm.390400	NM_172557	ENSMUSG00000020375	Rufy1	3000002E04Rik|Rabip4|ZFYVE12	RUN and FYVE domain containing 1	protein-coding
upeaks-38174	chr6	107007677	107008072	+	0	NA	Intergenic	Intergenic	-207787	NM_021449	58799	Mm.290085	NM_021449	ENSMUSG00000005362	Crbn	2610203G15Rik|2900045O07Rik|AF229032|AW108261|piL	cereblon	protein-coding
upeaks-44366	chr8	118443530	118443737	+	0	NA	intron (NM_019707, intron 1 of 13)	PB1D7|SINE|Alu	160022	NM_019707	12554	Mm.334841	NM_019707	ENSMUSG00000031841	Cdh13	4932416G01Rik|Cdht|Tcad	cadherin 13	protein-coding
upeaks-15800	chr15	57547206	57547544	+	0	NA	Intergenic	Intergenic	-69750	NM_172378	210463	Mm.26555	NM_172378	ENSMUSG00000022366	Slc22a22	oat-pg	solute carrier family 22 (organic cation transporter), member 22	protein-coding
upeaks-1465	chr1	98751334	98751856	+	0	NA	Intergenic	Intergenic	330471	NM_027584	70866	Mm.389164	NM_027584	ENSMUSG00000026336	Slco6d1	4921511I05Rik	solute carrier organic anion transporter family, member 6d1	protein-coding
upeaks-13267	chr13	119413057	119413321	+	0	NA	Intergenic	Intergenic	-3932	NM_001308506	18115	Mm.132584	NM_008710	ENSMUSG00000025453	Nnt	4930423F13Rik|AI323702|BB168308	nicotinamide nucleotide transhydrogenase	protein-coding
upeaks-36905	chr6	35321047	35321417	+	0	NA	intron (NM_173375, intron 1 of 2)	intron (NM_173375, intron 1 of 2)	4909	NM_173375	208164	Mm.257766	NM_173375	ENSMUSG00000047420	Fam180a	B230314O19	family with sequence similarity 180, member A	protein-coding
upeaks-18358	chr16	81745549	81745777	+	0	NA	Intergenic	RLTR22_Mus|LTR|ERVK	544966	NM_010954	17968	Mm.433941	NM_010954	ENSMUSG00000022762	Ncam2	Ncam-2|Ocam|RNCAM	neural cell adhesion molecule 2	protein-coding
upeaks-17861	chr16	38817243	38817586	+	0	NA	intron (NM_029042, intron 3 of 3)	intron (NM_029042, intron 3 of 3)	11335	NM_029042	74663	Mm.50263	NM_029042	ENSMUSG00000022798	4930435E12Rik	TSCPA	RIKEN cDNA 4930435E12 gene	protein-coding
upeaks-38551	chr6	122742461	122742812	+	0	NA	5' UTR (NM_011401, exon 1 of 10)	5' UTR (NM_011401, exon 1 of 10)	109	NM_011401	20527	Mm.395108	NM_011401	ENSMUSG00000003153	Slc2a3	AA408729|AL023014|AL024341|AU040424|C78366|Glut-3|Glut3	solute carrier family 2 (facilitated glucose transporter), member 3	protein-coding
upeaks-31505	chr4	87707455	87707770	+	0	NA	Intergenic	Intergenic	98711	NM_029931	70122	Mm.288898	NM_027326	ENSMUSG00000028496	Mllt3	2210011H10Rik|2610012I03Rik|3830408D16Rik|Af9|D4Ertd321e	myeloid/lymphoid or mixed-lineage leukemia; translocated to, 3	protein-coding
upeaks-25677	chr2	116651610	116651815	+	0	NA	Intergenic	Intergenic	-226979	NM_026104	67356	Mm.131623	NM_026104	ENSMUSG00000027355	Tmco5	1700095F04Rik|Tmco5a	transmembrane and coiled-coil domains 5	protein-coding
upeaks-19559	chr17	35549463	35549843	+	0	NA	Intergenic	Intergenic	-2475	NM_001008424	386463	Mm.426664	NM_001008424	ENSMUSG00000039518	Cdsn	AI747712	corneodesmosin	protein-coding
upeaks-42995	chr8	50020637	50020898	+	0	NA	Intergenic	RLTR22_Mur|LTR|ERVK	-347345	NR_046067	100039954	Mm.400419	NR_046067	ENSMUSG00000110281	Gm2516	-	predicted gene 2516	ncRNA
upeaks-43911	chr8	95020497	95020715	+	0	NA	intron (NM_173036, intron 1 of 11)	intron (NM_173036, intron 1 of 11)	2914	NM_173036	54672	Mm.27995	NM_173036	ENSMUSG00000060470	Adgrg3	A030001G24Rik|AW214383|Gpr97|Pb1|Pb99	adhesion G protein-coupled receptor G3	protein-coding
upeaks-20089	chr17	63012289	63012637	+	0	NA	Intergenic	Intergenic	-131146	NM_010109	13640	Mm.7978	NM_010109	ENSMUSG00000048915	Efna5	AL-1|AV158822|EFL-5|Ephrin-A5|Epl7|LERK-7|RAGS	ephrin A5	protein-coding
upeaks-27237	chr2	171690805	171691044	+	0	NA	Intergenic	Intergenic	271875	NR_040509	75655	Mm.396203	NR_040509	ENSMUSG00000086823	1700028P15Rik	-	RIKEN cDNA 1700028P15 gene	ncRNA
upeaks-37702	chr6	85399880	85400234	+	0	NA	Intergenic	Intergenic	-23829	NM_001007472	384452	Mm.347883	NM_001007472	ENSMUSG00000068302	Noto	Flh|MmNot|Not|tc	notochord homeobox	protein-coding
upeaks-19829	chr17	47930436	47930669	+	0	NA	Intergenic	Intergenic	-5920	NM_001110824	74123	Mm.240062	NM_028767	ENSMUSG00000023991	Foxp4	1200010K03Rik|2310007G05Rik|mFKHLA	forkhead box P4	protein-coding
upeaks-42338	chr8	11183456	11183967	+	0	NA	Intergenic	Intergenic	-129094	NM_009932	12827	Mm.181021	NM_009932	ENSMUSG00000031503	Col4a2	Col4a-2	collagen, type IV, alpha 2	protein-coding
upeaks-8731	chr11	113326418	113326738	+	0	NA	intron (NM_001166503, intron 6 of 9)	intron (NM_001166503, intron 6 of 9)	-116909	NR_040276	319871	Mm.383743	NR_040276	ENSMUSG00000085421	4732490B19Rik	-	RIKEN cDNA 4732490B19 gene	ncRNA
upeaks-30307	chr3	157866656	157866888	+	0	NA	Intergenic	Intergenic	58291	NM_145953	107869	Mm.28301	NM_145953	ENSMUSG00000028179	Cth	0610010I13Rik|AI314617|BC019483|CSE|Cys3	cystathionase (cystathionine gamma-lyase)	protein-coding
upeaks-39144	chr6	146946238	146946636	+	0	NA	intron (NM_026221, intron 2 of 26)	intron (NM_026221, intron 2 of 26)	7984	NM_028509	73344	Mm.391543	NM_028509	ENSMUSG00000040163	1700034J05Rik	-	RIKEN cDNA 1700034J05 gene	protein-coding
upeaks-18753	chr17	4626113	4626678	+	0	NA	Intergenic	(CATTC)n|Satellite|Satellite	-8585	NR_130984	75117	Mm.429393	NR_130984		4930517M08Rik	-	RIKEN cDNA 4930517M08 gene	ncRNA
upeaks-19950	chr17	54709404	54709745	+	0	NA	Intergenic	Lx2|LINE|L1	-339500	NR_045825	69418	Mm.391004	NR_045825	ENSMUSG00000099747	1700025K24Rik	-	RIKEN cDNA 1700025K24 gene	ncRNA
upeaks-22715	chr19	24762556	24762755	+	0	NA	intron (NM_175013, intron 6 of 10)	intron (NM_175013, intron 6 of 10)	88647	NM_183160	226040	Mm.391170	NM_183160	ENSMUSG00000048572	Tmem252	E030010A14Rik	transmembrane protein 252	protein-coding
upeaks-26351	chr2	142715224	142715489	+	0	NA	intron (NM_001081133, intron 17 of 25)	intron (NM_001081133, intron 17 of 25)	186108	NM_001081133	16558	Mm.251934	NM_001081133	ENSMUSG00000038844	Kif16b	8430434E15Rik|AA623607|AI789011|C80253|C80902|mKIAA1590	kinesin family member 16B	protein-coding
upeaks-43925	chr8	95310637	95310903	+	0	NA	promoter-TSS (NM_028532)	promoter-TSS (NM_028532)	-828	NM_028532	73407	Mm.472783	NM_028532	ENSMUSG00000090206	Tepp	1700055M20Rik	testis, prostate and placenta expressed	protein-coding
upeaks-40750	chr7	83584770	83584978	+	0	NA	promoter-TSS (NM_177695)	promoter-TSS (NM_177695)	-57	NM_177695	233424	Mm.486619	NM_177695	ENSMUSG00000038540	Tmc3	9030203A06	transmembrane channel-like gene family 3	protein-coding
upeaks-44239	chr8	111865540	111865781	+	0	NA	3' UTR (NM_025781, exon 3 of 3)	3' UTR (NM_025781, exon 3 of 3)	11015	NM_025781	66817	Mm.345350	NM_025781	ENSMUSG00000031953	Tmem170	9030409E16Rik|AA403674|D8Bwg1414e|Tmem170a	transmembrane protein 170	protein-coding
upeaks-41887	chr7	135139320	135139554	+	0	NA	intron (NM_001033420, intron 42 of 51)	intron (NM_001033420, intron 42 of 51)	56565	NR_046050	74314	Mm.415339	NR_046050	ENSMUSG00000100717	1700120G07Rik	-	RIKEN cDNA 1700120G07 gene	ncRNA
upeaks-36414	chr5	151088180	151088379	+	0	NA	intron (NM_146258, intron 3 of 13)	intron (NM_146258, intron 3 of 13)	101914	NM_001163493	243362	Mm.209272	NM_146258	ENSMUSG00000016128	Stard13	DLC2|GT650	StAR-related lipid transfer (START) domain containing 13	protein-coding
upeaks-40853	chr7	90812538	90812744	+	0	NA	Intergenic	Intergenic	-278145	NM_011807	23859	Mm.147213	NM_011807	ENSMUSG00000052572	Dlg2	A330103J02Rik|B230218P12Rik|B330007M19Rik|Dlgh2|Gm1197|Gm21505|PSD93	discs, large homolog 2 (Drosophila)	protein-coding
upeaks-25457	chr2	104673151	104673356	+	0	NA	Intergenic	MurERV4-int|LTR|ERVK	38909	NM_177190	320554	Mm.249065	NM_177190	ENSMUSG00000027175	Tcp11l1	C130096D04Rik	t-complex 11 like 1	protein-coding
upeaks-15796	chr15	56862055	56862353	+	0	NA	Intergenic	MLTR18D_MM|LTR|ERVK	-167658	NM_008216	15117	Mm.5148	NM_008216	ENSMUSG00000022367	Has2	-	hyaluronan synthase 2	protein-coding
upeaks-23978	chr2	27679708	27679956	+	0	NA	intron (NM_011305, intron 1 of 9)	intron (NM_011305, intron 1 of 9)	2631	NM_011305	20181	Mm.24624	NM_011305	ENSMUSG00000015846	Rxra	9530071D11Rik|Nr2b1|RXRalpha1	retinoid X receptor alpha	protein-coding
upeaks-3003	chr1	183090106	183090494	+	0	NA	intron (NM_026866, intron 9 of 9)	intron (NM_026866, intron 9 of 9)	57257	NM_001278220	68897	Mm.327216	NM_026866	ENSMUSG00000030768	Disp1	1190008H24Rik|DispA	dispatched RND transporter family member 1	protein-coding
upeaks-42486	chr8	18862387	18862588	+	0	NA	intron (NM_026792, intron 2 of 7)	PB1D10|SINE|Alu	16208	NM_026792	52123	Mm.24117	NM_026792	ENSMUSG00000031467	Agpat5	1110013A05Rik|D8Ertd319e	1-acylglycerol-3-phosphate O-acyltransferase 5 (lysophosphatidic acid acyltransferase, epsilon)	protein-coding
upeaks-2132	chr1	145059904	145060198	+	0	NA	Intergenic	RLTR1C|LTR|ERV1	-284630	NM_022881	64214	Mm.253927	NM_022881	ENSMUSG00000026357	Rgs18	-	regulator of G-protein signaling 18	protein-coding
upeaks-40747	chr7	83491724	83491966	+	0	NA	Intergenic	Intergenic	-93086	NM_177695	233424	Mm.486619	NM_177695	ENSMUSG00000038540	Tmc3	9030203A06	transmembrane channel-like gene family 3	protein-coding
upeaks-20997	chr18	22482577	22482936	+	0	NA	intron (NM_001167777, intron 9 of 12)	intron (NM_001167777, intron 9 of 12)	137667	NM_001167777	211961	Mm.392310	NM_001167777	ENSMUSG00000045215	Asxl3	C230079D11Rik|D430002O22Rik|D930044O18Rik|Gm329|Gm945	additional sex combs like 3 (Drosophila)	protein-coding
upeaks-12249	chr13	63231759	63231980	+	0	NA	intron (NM_001289926, intron 11 of 15)	intron (NM_001289926, intron 11 of 15)	-8160	NR_110521	72061	Mm.188105	NM_028079	ENSMUSG00000021458	2010111I01Rik	2300006M17Rik|AP-O|AW742919|Aopep|ApO|mir-23b|mir-24-1|mir-27b	RIKEN cDNA 2010111I01 gene	protein-coding
upeaks-20418	chr17	79657798	79658082	+	0	NA	intron (NM_201361, intron 4 of 10)	intron (NM_201361, intron 4 of 10)	43040	NM_201361	381110	Mm.209801	NM_201361	ENSMUSG00000036368	Rmdn2	AW061290|Fam82a1|RMD-2|mRMD-2	regulator of microtubule dynamics 2	protein-coding
upeaks-42298	chr8	8870575	8870920	+	0	NA	Intergenic	Intergenic	-180210	NM_176849	234023	Mm.251655	NM_176849	ENSMUSG00000040459	Arglu1	9430010O03Rik|C130008N12	arginine and glutamate rich 1	protein-coding
upeaks-46604	chr9	95192760	95193075	+	0	NA	intron (NM_177909, intron 14 of 15)	intron (NM_177909, intron 14 of 15)	214353	NM_018763	54371	Mm.212446	NM_018763	ENSMUSG00000033350	Chst2	AI428561|AW121776|C130041E03Rik|Chts2|GST-2|GlcNAc6ST|Gn6st	carbohydrate sulfotransferase 2	protein-coding
upeaks-12773	chr13	95215808	95216235	+	0	NA	intron (NM_001170669, intron 1 of 18)	intron (NM_001170669, intron 1 of 18)	7029	NM_001170669	218461	Mm.100167	NM_172263	ENSMUSG00000021684	Pde8b	B230331L10Rik|C030047E14Rik	phosphodiesterase 8B	protein-coding
upeaks-3417	chr10	8078288	8078661	+	0	NA	Intergenic	Intergenic	-122351	NM_138667	68652	Mm.193041	NM_138667	ENSMUSG00000015755	Tab2	1110030N06Rik|A530078N03Rik|Map3k7ip2|mKIAA0733	TGF-beta activated kinase 1/MAP3K7 binding protein 2	protein-coding
upeaks-38186	chr6	108233224	108233520	+	0	NA	intron (NM_010585, intron 2 of 61)	intron (NM_010585, intron 2 of 61)	20276	NM_010585	16438	Mm.227912	NM_010585	ENSMUSG00000030102	Itpr1	D6Pas2|ENSMUSG00000072853|Gm10429|IP3R 1|IP3R1|InsP3R|Ip3r|Itpr-1|P400|Pcp-1|Pcp1|insP3R1|opt|wblo	inositol 1,4,5-trisphosphate receptor 1	protein-coding
upeaks-9668	chr12	41536362	41536561	+	0	NA	intron (NM_053122, intron 4 of 6)	intron (NM_053122, intron 4 of 6)	-50404	NM_010733	16981	Mm.404786	NM_010733	ENSMUSG00000036295	Lrrn3	NLRR-3	leucine rich repeat protein 3, neuronal	protein-coding
upeaks-36409	chr5	150970514	150970863	+	0	NA	intron (NM_013823, intron 1 of 4)	intron (NM_013823, intron 1 of 4)	18081	NM_013823	16591	Mm.6500	NM_013823	ENSMUSG00000058488	Kl	alpha-kl	klotho	protein-coding
upeaks-43784	chr8	90323818	90324173	+	0	NA	intron (NM_172913, intron 1 of 6)	intron (NM_172913, intron 1 of 6)	24257	NM_172913	244579	Mm.302755	NM_172913	ENSMUSG00000043668	Tox3	500-9|BC052044|C230068E13|CAGF9|Tnrc9	TOX high mobility group box family member 3	protein-coding
upeaks-26167	chr2	133941820	133942019	+	0	NA	Intergenic	Intergenic	377211	NR_037273	100526500		NR_037273	ENSMUSG00000093338	Mir3090	mmu-mir-3090	microRNA 3090	ncRNA
upeaks-30781	chr4	40309729	40309992	+	0	NA	Intergenic	RLTR30D2_MM|LTR|ERV1	-3372	NR_040663	75819	Mm.399244	NR_040663	ENSMUSG00000087137	4930509K18Rik	-	RIKEN cDNA 4930509K18 gene	ncRNA
upeaks-31171	chr4	62346447	62346676	+	0	NA	intron (NM_001045528, intron 2 of 27)	RMER5|LTR|ERV1	13987	NM_001045528	338355	Mm.357792	NM_001045528	ENSMUSG00000066151	Fkbp15	BB131447|C430014M02Rik|FKBO133|FKBP-133|FKBP-15|FKBP133|mKIAA0674	FK506 binding protein 15	protein-coding
upeaks-1467	chr1	99511627	99511841	+	0	NA	Intergenic	Intergenic	-261031	NM_172851	241175	Mm.251301	NM_172851	ENSMUSG00000067028	Cntnap5b	C230078M14Rik|Caspr5-2	contactin associated protein-like 5B	protein-coding
upeaks-23310	chr19	53571073	53571364	+	0	NA	Intergenic	RMER20C_Mm|LTR|ERVK	-29178	NM_007790	13006	Mm.14910	NM_007790	ENSMUSG00000024974	Smc3	Bamacan|Cspg6|HCAP|Mmip1|SMC-3|SmcD	structural maintenance of chromosomes 3	protein-coding
upeaks-38473	chr6	120188447	120188671	+	0	NA	intron (NM_016718, intron 1 of 3)	intron (NM_016718, intron 1 of 3)	-5264	NM_001347432	29862	Mm.103668	NM_016718	ENSMUSG00000041377	Ninj2	-	ninjurin 2	protein-coding
upeaks-13425	chr14	15274011	15274214	+	0	NA	Intergenic	Intergenic	164875	NM_146052	218763	Mm.138039	NM_146052	ENSMUSG00000045201	Lrrc3b	BC019794|LRP15	leucine rich repeat containing 3B	protein-coding
upeaks-42013	chr7	140675885	140676198	+	0	NA	Intergenic	MMERVK9C_I-int|LTR|ERVK	8752	NM_146961	258963	Mm.377773	NM_146961	ENSMUSG00000059136	Olfr539	MOR253-4	olfactory receptor 539	protein-coding
upeaks-15745	chr15	53359789	53360107	+	0	NA	Intergenic	Intergenic	-13765	NM_010162	14042	Mm.309395	NM_010162	ENSMUSG00000061731	Ext1	AA409028	exostoses (multiple) 1	protein-coding
upeaks-21514	chr18	55602734	55603029	+	0	NA	Intergenic	Lx2|LINE|L1	-612701	NM_175751	269023	Mm.192984	NM_175751	ENSMUSG00000052713	Zfp608	4932417D18Rik|D430007A19Rik|Znf608	zinc finger protein 608	protein-coding
upeaks-960	chr1	74719871	74720099	+	0	NA	intron (NM_024264, intron 1 of 8)	B1_Mm|SINE|Alu	6450	NM_024264	104086	Mm.85083	NM_024264	ENSMUSG00000026170	Cyp27a1	1300013A03Rik|Cyp27	cytochrome P450, family 27, subfamily a, polypeptide 1	protein-coding
upeaks-11028	chr12	118263969	118264273	+	0	NA	intron (NM_001166385, intron 3 of 5)	RMER16A2|LTR|ERVK	37319	NM_009239	20688	Mm.34699	NM_009239	ENSMUSG00000025323	Sp4	5730497N03Rik|HF-1b|HF1-b	trans-acting transcription factor 4	protein-coding
upeaks-28453	chr3	80078564	80078780	+	0	NA	Intergenic	ID_B1|SINE|B4	192742	NM_133187	68659	Mm.427274	NM_133187	ENSMUSG00000027955	Fam198b	1110032E23Rik|2210419I08Rik|AV011458|Ened	family with sequence similarity 198, member B	protein-coding
upeaks-40966	chr7	98419756	98420008	+	0	NA	Intergenic	MLT1D|LTR|ERVL-MaLR	-20534	NM_001130693	14918	Mm.389928	NM_001034890	ENSMUSG00000074003	Gucy2d	-	guanylate cyclase 2d	protein-coding
upeaks-38045	chr6	99058714	99058935	+	0	NA	intron (NM_001347345, intron 6 of 19)	intron (NM_001347345, intron 6 of 19)	-30526	NM_001197322	108655	Mm.234965	NM_053202	ENSMUSG00000030067	Foxp1	3110052D19Rik|4932443N09Rik|AI461938|AW494214	forkhead box P1	protein-coding
upeaks-26446	chr2	146099093	146099442	+	0	NA	Intergenic	Intergenic	-122730	NM_016889	53626	Mm.379070	NM_016889	ENSMUSG00000068154	Insm1	IA-1	insulinoma-associated 1	protein-coding
upeaks-6456	chr11	34010666	34010865	+	0	NA	Intergenic	Intergenic	-17572	NM_001190886	70357	Mm.252514	NM_027398	ENSMUSG00000053519	Kcnip1	KCHIP1|Kchip1.2	Kv channel-interacting protein 1	protein-coding
upeaks-16081	chr15	74535580	74535848	+	0	NA	intron (NM_174991, intron 2 of 30)	intron (NM_174991, intron 2 of 30)	19518	NM_174991	107831	Mm.43133	NM_174991	ENSMUSG00000034730	Adgrb1	B830018M07Rik|Bai1|R75078|mKIAA4089	adhesion G protein-coupled receptor B1	protein-coding
upeaks-48255	chrX	153835180	153835389	+	0	NA	Intergenic	Intergenic	2991	NM_001005370	278240	Mm.293363	NM_001005370	ENSMUSG00000046550	Spin2c	BC068162|SPIN-2C|Spin2	spindlin family, member 2C	protein-coding
upeaks-1427	chr1	94013889	94014102	+	0	NA	Intergenic	Intergenic	-6498	NM_001310769	241159	Mm.214565	NM_173772	ENSMUSG00000034000	Neu4	9330166I04	sialidase 4	protein-coding
upeaks-35344	chr5	116064172	116064394	+	0	NA	intron (NM_001101546, intron 1 of 2)	PB1|SINE|Alu	18963	NM_001101546	545798	Mm.483995	NM_001101546	ENSMUSG00000079278	Tmem233	DSPB2|Gm13843|OTTMUSG00000014722	transmembrane protein 233	protein-coding
upeaks-1489	chr1	104713393	104713858	+	0	NA	Intergenic	L1_Mus3|LINE|L1	-55194	NM_011800	23836	Mm.103640	NM_011800	ENSMUSG00000050840	Cdh20	Cdh7	cadherin 20	protein-coding
upeaks-45557	chr9	46694396	46694595	+	0	NA	Intergenic	L1MA5|LINE|L1	-219108	NR_015605	73040	Mm.265384	NR_015605	ENSMUSG00000099696	2900052N01Rik	AU067665	RIKEN cDNA 2900052N01 gene	ncRNA
upeaks-861	chr1	71720014	71720255	+	0	NA	Intergenic	MLT1J2|LTR|ERVL-MaLR	66799	NR_040308	100042814	Mm.405775	NR_040308	ENSMUSG00000073652	Apol7d	ENSMUSG00000073652|Gm15456|OTTMUSG00000022136	apolipoprotein L 7d	ncRNA
upeaks-34732	chr5	91617316	91617606	+	0	NA	intron (NM_145562, intron 3 of 3)	intron (NM_145562, intron 3 of 3)	99761	NM_145562	231440	Mm.5002	NM_145562	ENSMUSG00000034981	Parm1	2210012L08Rik|9130213B05Rik|W91666	prostate androgen-regulated mucin-like protein 1	protein-coding
upeaks-42346	chr8	11274427	11274798	+	0	NA	intron (NR_133670, intron 1 of 52)	intron (NR_133670, intron 1 of 52)	-38193	NM_009932	12827	Mm.181021	NM_009932	ENSMUSG00000031503	Col4a2	Col4a-2	collagen, type IV, alpha 2	protein-coding
upeaks-30731	chr4	34114161	34114762	+	0	NA	Intergenic	Intergenic	-64394	NM_026293	67652	Mm.55848	NM_026293	ENSMUSG00000028264	Spaca1	1700124L11Rik|4930540L03Rik	sperm acrosome associated 1	protein-coding
upeaks-34000	chr5	34619169	34619368	+	0	NA	intron (NM_001331085, intron 10 of 16)	intron (NM_001331085, intron 10 of 16)	17846	NM_026660	68294	Mm.34564	NM_026660	ENSMUSG00000001082	Mfsd10	0610009O03Rik|Tetran	major facilitator superfamily domain containing 10	protein-coding
upeaks-26806	chr2	157914793	157915116	+	0	NA	intron (NM_198627, intron 1 of 3)	CpG	301	NM_198627	277432	Mm.441156	NM_198627	ENSMUSG00000037843	Vstm2l	Gm691	V-set and transmembrane domain containing 2-like	protein-coding
upeaks-7122	chr11	63904894	63905233	+	0	NA	intron (NM_018805, intron 1 of 1)	intron (NM_018805, intron 1 of 1)	17221	NM_018805	54710	Mm.274426	NM_018805	ENSMUSG00000070407	Hs3st3b1	3-OST-3B|3OST3B1|3Ost3b|AU041882|AW536289|Hs3st3b|m3-OST-3B	heparan sulfate (glucosamine) 3-O-sulfotransferase 3B1	protein-coding
upeaks-38669	chr6	126816727	126816952	+	0	NA	Intergenic	RMER17A2|LTR|ERVK	32305	NM_025358	66108	Mm.29939	NM_025358	ENSMUSG00000000399	Ndufa9	1010001N11Rik	NADH dehydrogenase (ubiquinone) 1 alpha subcomplex, 9	protein-coding
upeaks-22803	chr19	30942438	30942905	+	0	NA	intron (NM_011160, intron 4 of 17)	intron (NM_011160, intron 4 of 17)	-11709	NR_033643	625995	Mm.454508	NR_033643		Gm6642	EG625995	ubiquitin-like 5 pseudogene	pseudo
upeaks-24439	chr2	43654047	43654246	+	0	NA	intron (NM_027552, intron 10 of 13)	Lx7|LINE|L1	-94678	NM_001301831	76117	Mm.217350	NM_153820	ENSMUSG00000049744	Arhgap15	5830480G12Rik	Rho GTPase activating protein 15	protein-coding
upeaks-20722	chr17	94428931	94429134	+	0	NA	Intergenic	Intergenic	320860	NM_176917	76781	Mm.139146	NM_176917	ENSMUSG00000055660	Mettl4	2410198H06Rik|A730091E08Rik|AV296509|HsT661	methyltransferase like 4	protein-coding
upeaks-2609	chr1	168476919	168477274	+	0	NA	Intergenic	Intergenic	-13547	NR_105766	102465178		NR_105766	ENSMUSG00000098407	Mir6348	Gm27412|mmu-mir-6348	microRNA 6348	ncRNA
upeaks-1757	chr1	128593118	128593501	+	0	NA	Intergenic	Intergenic	-1010	NM_009911	12767	Mm.1401	NM_009911	ENSMUSG00000045382	Cxcr4	CD184|Cmkar4|LESTR|PB-CKR|PBSF/SDF-1|Sdf1r|b2b220Clo	chemokine (C-X-C motif) receptor 4	protein-coding
upeaks-38445	chr6	119193656	119194069	+	0	NA	intron (NM_001033379, intron 3 of 8)	intron (NM_001033379, intron 3 of 8)	2547	NM_001255998	12288	Mm.41628	NM_009781	ENSMUSG00000051331	Cacna1c	Cav1.2|Cchl1a1|D930026N18Rik|MBC|MELC-CC	calcium channel, voltage-dependent, L type, alpha 1C subunit	protein-coding
upeaks-7657	chr11	80363301	80363500	+	0	NA	3' UTR (NM_027472, exon 10 of 10)	3' UTR (NM_027472, exon 10 of 10)	14615	NM_027472	70591	Mm.86860	NM_027472	ENSMUSG00000057181	5730455P16Rik	-	RIKEN cDNA 5730455P16 gene	protein-coding
upeaks-13752	chr14	30491367	30491732	+	0	NA	promoter-TSS (NM_028981)	promoter-TSS (NM_028981)	-393	NM_028981	12289	Mm.9772	NM_028981	ENSMUSG00000015968	Cacna1d	8430418G19Rik|C79217|Cach3|Cacn4|Cacnl1a2|Cav1.3|Cchl1a|Cchl1a2|D-LTCC	calcium channel, voltage-dependent, L type, alpha 1D subunit	protein-coding
upeaks-40492	chr7	71125309	71125712	+	0	NA	Intergenic	Intergenic	-758764	NM_183261	11819	Mm.158143	NM_009697	ENSMUSG00000030551	Nr2f2	2700033K02Rik|9430015G03Rik|ARP-1|Aporp1|COUP-TF2|COUP-TFII|COUPTFB|EAR3|SVP40|Tcfcoup2	nuclear receptor subfamily 2, group F, member 2	protein-coding
upeaks-14801	chr14	99298345	99299460	+	0	NA	5' UTR (NM_009769, exon 1 of 4)	5' UTR (NM_009769, exon 1 of 4)	211	NM_009769	12224	Mm.30262	NM_009769	ENSMUSG00000005148	Klf5	4930520J07Rik|Bteb2|CKLF|IKLF	Kruppel-like factor 5	protein-coding
upeaks-38986	chr6	141000536	141000883	+	0	NA	Intergenic	Intergenic	-248560	NM_018779	54611	Mm.103728	NM_018779	ENSMUSG00000041741	Pde3a	A930022O17Rik|C87899	phosphodiesterase 3A, cGMP inhibited	protein-coding
upeaks-6561	chr11	40893788	40893987	+	0	NA	Intergenic	RLTR13E|LTR|ERVK	-138601	NM_009831	12450	Mm.2103	NM_009831	ENSMUSG00000020326	Ccng1	AI314029	cyclin G1	protein-coding
upeaks-41569	chr7	122930595	122930890	+	0	NA	Intergenic	Lx9|LINE|L1	39717	NR_045614	73951	Mm.389936	NR_045614		4930413G21Rik	-	RIKEN cDNA 4930413G21 gene	ncRNA
upeaks-28024	chr3	50607027	50607251	+	0	NA	Intergenic	Intergenic	-163526	NM_011990	26570	Mm.260988	NM_011990	ENSMUSG00000027737	Slc7a11	9930009M05Rik|AI451155|sut|xCT	solute carrier family 7 (cationic amino acid transporter, y+ system), member 11	protein-coding
upeaks-35433	chr5	119613438	119613795	+	0	NA	Intergenic	Intergenic	-12326	NR_046178	330183	Mm.413133	NR_046178	ENSMUSG00000085708	Gm16063	G630008E18|OTTMUSG00000029664	predicted gene 16063	ncRNA
upeaks-30649	chr4	28658917	28659132	+	0	NA	Intergenic	RLTR9C|LTR|ERVK	-154107	NM_001290434	13841	Mm.257266	NM_010141	ENSMUSG00000028289	Epha7	Cek11|Ebk|Ehk3|Hek11|Mdk1	Eph receptor A7	protein-coding
upeaks-30290	chr3	157027190	157027447	+	0	NA	intron (NM_177274, intron 3 of 6)	Eulor3|DNA?|DNA?	465524	NM_001039094	320840	Mm.317293	NM_177274	ENSMUSG00000040037	Negr1	5330422G01Rik|KILON|Ntra	neuronal growth regulator 1	protein-coding
upeaks-22561	chr19	10789800	10790110	+	0	NA	3' UTR (NM_009852, exon 13 of 13)	3' UTR (NM_009852, exon 13 of 13)	40103	NM_001037801	12511	Mm.290897	NM_009852	ENSMUSG00000024670	Cd6	-	CD6 antigen	protein-coding
upeaks-21471	chr18	53425842	53426222	+	0	NA	Intergenic	Intergenic	-8025	NM_008908	19038	Mm.4587	NM_008908	ENSMUSG00000024538	Ppic	CyP-20c	peptidylprolyl isomerase C	protein-coding
upeaks-34939	chr5	102719707	102719906	+	0	NA	intron (NM_146161, intron 2 of 8)	intron (NM_146161, intron 2 of 8)	-49004	NM_001286468	231532	Mm.440191	NM_029270	ENSMUSG00000057315	Arhgap24	0610025G21Rik	Rho GTPase activating protein 24	protein-coding
upeaks-31078	chr4	56719494	56719804	+	0	NA	Intergenic	Intergenic	21776	NM_025271	11471	Mm.251434	NM_025271	ENSMUSG00000070980	Actl7b	Tact1	actin-like 7b	protein-coding
upeaks-45565	chr9	47376736	47377341	+	0	NA	Intergenic	Intergenic	-153132	NM_001310841	54725	Mm.234832	NM_018770	ENSMUSG00000032076	Cadm1	2900073G06Rik|3100001I08Rik|AI987920|Bl2|Igsf4|Igsf4a|Necl2|RA175|RA175A|RA175B|RA175C|RA175N|ST17|SgIGSF|SynCam|Tslc1	cell adhesion molecule 1	protein-coding
upeaks-39285	chr7	5030675	5030874	+	0	NA	exon (NM_001290426, exon 2 of 3)	exon (NM_001290426, exon 2 of 3)	7672	NM_001039532	654801	Mm.333548	NM_001039532	ENSMUSG00000043290	Zfp784	C730049F21Rik|Znf784	zinc finger protein 784	protein-coding
upeaks-1545	chr1	107878702	107878984	+	0	NA	Intergenic	Lx5c|LINE|L1	-38416	NR_102306	319596	Mm.136054	NR_102306	ENSMUSG00000100457	D830032E09Rik	-	RIKEN cDNA D830032E09 gene	ncRNA
upeaks-15690	chr15	48026783	48027264	+	0	NA	intron (NM_001081391, intron 13 of 70)	Lx|LINE|L1	764966	NM_001081391	239420	Mm.309363	NM_001081391	ENSMUSG00000022311	Csmd3	4930500N14Rik|mKIAA1894	CUB and Sushi multiple domains 3	protein-coding
upeaks-26265	chr2	137872274	137872797	+	0	NA	Intergenic	Intergenic	-384049	NM_001025431	228662	Mm.153405	NM_145534	ENSMUSG00000062098	Btbd3	mKIAA0952	BTB (POZ) domain containing 3	protein-coding
upeaks-48362	chrX	167053270	167053494	+	0	NA	Intergenic	B1F1|SINE|Alu	16988	NM_001101606	667794	Mm.302232	NM_001101606		Gm8817	EG667794	predicted gene 8817	protein-coding
upeaks-24681	chr2	60553158	60553742	+	0	NA	promoter-TSS (NM_008867)	promoter-TSS (NM_008867)	-142	NM_008867	18779	Mm.5092	NM_008867	ENSMUSG00000054580	Pla2r1	Pla2-r|Pla2g1br|Pla2r	phospholipase A2 receptor 1	protein-coding
upeaks-45281	chr9	35061552	35061773	+	0	NA	intron (NM_009178, intron 1 of 10)	MLT1A0-int|LTR|ERVL-MaLR	-55066	NR_029475	78934	Mm.391688	NR_029475	ENSMUSG00000070315	4930581F22Rik	-	RIKEN cDNA 4930581F22 gene	ncRNA
upeaks-37108	chr6	48010726	48011044	+	0	NA	Intergenic	Intergenic	36909	NM_001347139	72306	Mm.381553	NM_001081382	ENSMUSG00000071477	Zfp777	2500002G23Rik	zinc finger protein 777	protein-coding
upeaks-47832	chrX	91085154	91085549	+	0	NA	Intergenic	RLTR50B|LTR|ERVK	-69817	NR_126535	101055749	Mm.300769	NR_126535	ENSMUSG00000059972	LOC101055749	-	Gm5941 pseudogene	pseudo
upeaks-46608	chr9	95279680	95279888	+	0	NA	Intergenic	Intergenic	127486	NM_018763	54371	Mm.212446	NM_018763	ENSMUSG00000033350	Chst2	AI428561|AW121776|C130041E03Rik|Chts2|GST-2|GlcNAc6ST|Gn6st	carbohydrate sulfotransferase 2	protein-coding
upeaks-43071	chr8	57757498	57757759	+	0	NA	Intergenic	MTD-int|LTR|ERVL-MaLR	-104573	NM_144731	108150	Mm.62886	NM_144731	ENSMUSG00000031608	Galnt7	AI225872	UDP-N-acetyl-alpha-D-galactosamine: polypeptide N-acetylgalactosaminyltransferase 7	protein-coding
upeaks-25714	chr2	118147773	118148046	+	0	NA	Intergenic	Intergenic	36033	NM_011580	21825	Mm.4159	NM_011580	ENSMUSG00000040152	Thbs1	TSP-1|TSP1|Thbs-1|tbsp1	thrombospondin 1	protein-coding
upeaks-26109	chr2	132218454	132218653	+	0	NA	Intergenic	PB1|SINE|Alu	29235	NM_001141971	70612	Mm.30116	NM_027478	ENSMUSG00000027341	Tmem230	5730494N06Rik|AA407821	transmembrane protein 230	protein-coding
upeaks-21728	chr18	65427394	65427618	+	0	NA	intron (NR_105742, intron 3 of 6)	7SLRNA|srpRNA|srpRNA	-3491	NM_172833	240354	Mm.132613	NM_172833	ENSMUSG00000032688	Malt1	A630046N12|D430033E09Rik|Pcasp1	MALT1 paracaspase	protein-coding
upeaks-183	chr1	17642191	17642783	+	0	NA	Intergenic	MTC-int|LTR|ERVL-MaLR	40586	NM_053191	94227	Mm.442452	NM_053191	ENSMUSG00000067780	Pi15	P24TI|P25TI|PI-15|SugarCrisp	peptidase inhibitor 15	protein-coding
upeaks-7908	chr11	88841406	88841705	+	0	NA	intron (NM_001042541, intron 2 of 10)	intron (NM_001042541, intron 2 of 10)	9948	NM_009648	11640	Mm.2969	NM_009648	ENSMUSG00000018428	Akap1	AKAP121|AKAP84|Akap|C76494|C81186|DAKAP1|S-AKAP84	A kinase (PRKA) anchor protein 1	protein-coding
upeaks-32097	chr4	117630208	117630687	+	0	NA	intron (NM_001285901, intron 6 of 7)	intron (NM_001285901, intron 6 of 7)	51778	NM_023178	66233	Mm.29142	NM_023178	ENSMUSG00000009640	Dmap1	1500016M21Rik|DNMAP1|DNMTAP1|Dmtap1|mKIAA1425	DNA methyltransferase 1-associated protein 1	protein-coding
upeaks-32425	chr4	128636229	128636457	+	0	NA	Intergenic	MLT1G1|LTR|ERVL-MaLR	-17724	NM_205823	384059	Mm.331901	NM_205823	ENSMUSG00000062545	Tlr12	Gm1365|Tlr11	toll-like receptor 12	protein-coding
upeaks-1764	chr1	128723289	128723631	+	0	NA	Intergenic	Intergenic	-131161	NM_009911	12767	Mm.1401	NM_009911	ENSMUSG00000045382	Cxcr4	CD184|Cmkar4|LESTR|PB-CKR|PBSF/SDF-1|Sdf1r|b2b220Clo	chemokine (C-X-C motif) receptor 4	protein-coding
upeaks-29238	chr3	107379465	107379787	+	0	NA	Intergenic	Intergenic	-46337	NM_001045807	229700	Mm.27966	NM_001045807	ENSMUSG00000048109	Rbm15	C230088J01Rik|mKIAA1438	RNA binding motif protein 15	protein-coding
upeaks-12593	chr13	82066112	82066353	+	0	NA	Intergenic	Intergenic	282940	NM_007684	12626	Mm.12481	NM_007684	ENSMUSG00000021537	Cetn3	MmCEN3	centrin 3	protein-coding
upeaks-26498	chr2	148373576	148374129	+	0	NA	Intergenic	Intergenic	-21525	NM_009219	20608	Mm.35324	NM_009219	ENSMUSG00000037014	Sstr4	Smstr4|sst4	somatostatin receptor 4	protein-coding
upeaks-46487	chr9	87702261	87702626	+	0	NA	TTS (NM_023814)	TTS (NM_023814)	28817	NM_023814	76365	Mm.158789	NM_023814	ENSMUSG00000032419	Tbx18	2810012F10Rik|2810404D13Rik	T-box18	protein-coding
upeaks-8385	chr11	101790797	101791132	+	0	NA	Intergenic	(T)n|Simple_repeat|Simple_repeat	-5654	NM_001316366	18612	Mm.5025	NM_008815	ENSMUSG00000017724	Etv4	AW414408|Pea-3|Pea3	ets variant 4	protein-coding
upeaks-38189	chr6	108252739	108253068	+	0	NA	intron (NM_010585, intron 4 of 61)	intron (NM_010585, intron 4 of 61)	39807	NM_010585	16438	Mm.227912	NM_010585	ENSMUSG00000030102	Itpr1	D6Pas2|ENSMUSG00000072853|Gm10429|IP3R 1|IP3R1|InsP3R|Ip3r|Itpr-1|P400|Pcp-1|Pcp1|insP3R1|opt|wblo	inositol 1,4,5-trisphosphate receptor 1	protein-coding
upeaks-15815	chr15	57970259	57970550	+	0	NA	TTS (NM_001081396)	TTS (NM_001081396)	-15499	NM_173862	239463	Mm.221241	NM_173862	ENSMUSG00000051225	Fam83a	-	family with sequence similarity 83, member A	protein-coding
upeaks-130	chr1	13926037	13926237	+	0	NA	Intergenic	Intergenic	-139208	NR_004447	433273	Mm.304088	NR_004447	ENSMUSG00000097711	Gm5523	EG433273	glyceraldehyde-3-phosphate dehydrogenase pseudogene	pseudo
upeaks-41549	chr7	121939765	121940111	+	0	NA	intron (NM_001033318, intron 11 of 16)	intron (NM_001033318, intron 11 of 16)	41755	NM_001033318	233824	Mm.442015	NM_001033318	ENSMUSG00000034951	Cog7	5630400E24Rik|Gm167	component of oligomeric golgi complex 7	protein-coding
upeaks-17994	chr16	48759330	48759940	+	0	NA	intron (NM_198297, intron 2 of 5)	intron (NM_198297, intron 2 of 5)	12321	NM_198297	77647	Mm.167298	NM_198297	ENSMUSG00000030775	Trat1	C030046M14Rik|Tcrim|Trim	T cell receptor associated transmembrane adaptor 1	protein-coding
upeaks-16368	chr15	81178830	81179029	+	0	NA	intron (NM_001082536, intron 1 of 13)	L2|LINE|L2	11828	NM_001082536	223701	Mm.439814	NM_153049	ENSMUSG00000042292	Mkl1	AMKL|Bsac|Mal|Mrtf-A	MKL (megakaryoblastic leukemia)/myocardin-like 1	protein-coding
upeaks-40741	chr7	83361670	83362002	+	0	NA	Intergenic	Intergenic	213366	NM_177895	330578	Mm.5796	NM_177895	ENSMUSG00000053528	A530021J07Rik	-	Riken cDNA A530021J07 gene	protein-coding
upeaks-30226	chr3	154093668	154093937	+	0	NA	intron (NM_001081263, intron 1 of 21)	intron (NM_001081263, intron 1 of 21)	120366	NM_001081263	242259	Mm.239962	NM_001081263	ENSMUSG00000028360	Slc44a5	AA117069|Gm422	solute carrier family 44, member 5	protein-coding
upeaks-39031	chr6	142831863	142832113	+	0	NA	non-coding (NR_045707, exon 7 of 7)	non-coding (NR_045707, exon 7 of 7)	17757	NR_045707	665037	Mm.401493	NR_045707	ENSMUSG00000072683	Gm7457	EG665037|ENSMUSG00000072683	predicted gene 7457	ncRNA
upeaks-21253	chr18	38050035	38050292	+	0	NA	Intergenic	Intergenic	-51194	NM_001205336	106952	Mm.247642	NM_139206	ENSMUSG00000024451	Arap3	Centd3|Drag1|E030006K04Rik|cnt-d3	ArfGAP with RhoGAP domain, ankyrin repeat and PH domain 3	protein-coding
upeaks-6193	chr11	20317967	20318166	+	0	NA	intron (NM_018861, intron 3 of 7)	PB1|SINE|Alu	14647	NM_018861	55963	Mm.6379	NM_018861	ENSMUSG00000020142	Slc1a4	ASCT-1|ASCT1|AW045657|SATT	solute carrier family 1 (glutamate/neutral amino acid transporter), member 4	protein-coding
upeaks-27372	chr2	178520367	178520594	+	0	NA	Intergenic	MLTR73|LTR|ERV1	89965	NM_001291189	381409	Mm.330860	NM_198656	ENSMUSG00000039155	Cdh26	Gm1010	cadherin-like 26	protein-coding
upeaks-1596	chr1	118482394	118482810	+	0	NA	intron (NM_001293300, intron 8 of 40)	intron (NM_001293300, intron 8 of 40)	-23337	NR_027901	68204	Mm.443536	NR_027901	ENSMUSG00000107722	2900060B14Rik	-	RIKEN cDNA 2900060B14 gene	ncRNA
upeaks-147	chr1	15451617	15452179	+	0	NA	intron (NM_001098528, intron 1 of 1)	intron (NM_001098528, intron 1 of 1)	139446	NM_001098528	98741	Mm.156081	NM_001033195	ENSMUSG00000092083	Kcnb2	9630047L19Rik|BB130875|Kv2.2	potassium voltage gated channel, Shab-related subfamily, member 2	protein-coding
upeaks-41186	chr7	107601128	107601438	+	0	NA	intron (NM_008905, intron 1 of 24)	intron (NM_008905, intron 1 of 24)	-5561	NM_001163557	19024	Mm.2817	NM_008905	ENSMUSG00000036528	Ppfibp2	Cclp1	PTPRF interacting protein, binding protein 2 (liprin beta 2)	protein-coding
upeaks-27293	chr2	173369089	173369345	+	0	NA	Intergenic	Intergenic	-92684	NM_022995	65112	Mm.73682	NM_022995	ENSMUSG00000038400	Pmepa1	2210418I02Rik|AW455466|Erg1.2|N4wbp4|Stag1|Tmepai	prostate transmembrane protein, androgen induced 1	protein-coding
upeaks-23428	chr19	58762381	58762671	+	0	NA	intron (NM_011128, intron 4 of 11)	G-rich|Low_complexity|Low_complexity	2803	NM_011128	18947	Mm.212333	NM_011128	ENSMUSG00000025091	Pnliprp2	PLRP2	pancreatic lipase-related protein 2	protein-coding
upeaks-29297	chr3	108438647	108438860	+	0	NA	intron (NM_001204979, intron 1 of 10)	PB1D10|SINE|Alu	6506	NM_011319	20226	Mm.28688	NM_011319	ENSMUSG00000068739	Sars	Sars1|Strs|serRS	seryl-aminoacyl-tRNA synthetase	protein-coding
upeaks-31730	chr4	101393348	101393579	+	0	NA	intron (NR_040640, intron 3 of 3)	intron (NR_040640, intron 3 of 3)	-25826	NM_001177602	11639	Mm.42040	NM_009647	ENSMUSG00000028527	Ak4	AK 4|Ak-3|Ak-4|Ak3|Ak3l1|D4Ertd274e	adenylate kinase 4	protein-coding
upeaks-37985	chr6	94729307	94729506	+	0	NA	Intergenic	Intergenic	-29261	NM_008377	16206	Mm.245210	NM_008377	ENSMUSG00000030029	Lrig1	D6Bwg0781e|Img|LIG-1	leucine-rich repeats and immunoglobulin-like domains 1	protein-coding
upeaks-26306	chr2	140389641	140389858	+	0	NA	promoter-TSS (NM_001033296)	promoter-TSS (NM_001033296)	-39	NM_001033296	228684	Mm.486585	NM_001033296	ENSMUSG00000074764	Sel1l2	Gm118	sel-1 suppressor of lin-12-like 2 (C. elegans)	protein-coding
upeaks-1132	chr1	84217855	84218112	+	0	NA	TTS (NR_105771)	TTS (NR_105771)	978	NR_105771	102465181		NR_105771	ENSMUSG00000098851	Mir6353	Gm27391|mmu-mir-6353	microRNA 6353	ncRNA
upeaks-8637	chr11	109097821	109098284	+	0	NA	Intergenic	Intergenic	46317	NR_037978	268498	Mm.227970	NM_001085512	ENSMUSG00000078605	E030025P04Rik	Gm664	RIKEN cDNA E030025P04 gene	ncRNA
upeaks-26139	chr2	133150288	133150551	+	0	NA	Intergenic	Intergenic	-204383	NM_198029	241639	Mm.209784	NM_198029	ENSMUSG00000027356	Fermt1	5830467P10Rik|Kindlin-1	fermitin family member 1	protein-coding
upeaks-47575	chrX	37753525	37753889	+	0	NA	promoter-TSS (NM_008818)	promoter-TSS (NM_008818)	-901	NM_008818	18617	Mm.423066	NM_008818	ENSMUSG00000095180	Rhox5	AA409564|Pem	reproductive homeobox 5	protein-coding
upeaks-3721	chr10	27597310	27597523	+	0	NA	intron (NM_008481, intron 1 of 63)	(GAATG)n|Simple_repeat|Simple_repeat	19526	NM_008481	16773	Mm.256087	NM_008481	ENSMUSG00000019899	Lama2	5830440B04|dy|mKIAA4087|mer|merosin	laminin, alpha 2	protein-coding
upeaks-40010	chr7	43547149	43547371	+	0	NA	Intergenic	Intergenic	-14089	NM_021293	12489	Mm.140157	NM_021293	ENSMUSG00000004609	Cd33	Siglec-3|gp67	CD33 antigen	protein-coding
upeaks-33166	chr4	148473292	148473491	+	0	NA	intron (NM_020009, intron 19 of 57)	PB1|SINE|Alu	24809	NM_020009	56717	Mm.21158	NM_020009	ENSMUSG00000028991	Mtor	2610315D21Rik|AI327068|FRAP|FRAP2|Frap1|RAFT1|RAPT1|flat	mechanistic target of rapamycin (serine/threonine kinase)	protein-coding
upeaks-22724	chr19	25121867	25122066	+	0	NA	intron (NM_028785, intron 16 of 47)	intron (NM_028785, intron 16 of 47)	-115236	NM_181404	107351	Mm.260722	NM_181404	ENSMUSG00000032702	Kank1	A930031B09Rik|AU015049|AW121052|Ankrd15|D330024H06Rik|mKIAA0172	KN motif and ankyrin repeat domains 1	protein-coding
upeaks-29694	chr3	130589603	130589825	+	0	NA	intron (NM_029838, intron 35 of 37)	intron (NM_029838, intron 35 of 37)	-27734	NM_001163587	71760	Mm.29125	NM_027907	ENSMUSG00000019232	Etnppl	1300019H02Rik|AI195447|Agxt2l1	ethanolamine phosphate phospholyase	protein-coding
upeaks-18921	chr17	13692626	13693293	+	0	NA	Intergenic	Intergenic	-67582	NM_010806	17356	Mm.59167	NM_010806	ENSMUSG00000068036	Afdn	5033403D15Rik|AF6|Af-6|Afadin|Gm314|I-afadin|Mllt4|S-afadin	afadin, adherens junction formation factor	protein-coding
upeaks-9455	chr12	27311865	27312500	+	0	NA	Intergenic	Intergenic	30536	NM_009234	20666	Mm.41702	NM_009234	ENSMUSG00000063632	Sox11	1110038H03Rik|6230403H02Rik|AI836553|end1	SRY (sex determining region Y)-box 11	protein-coding
upeaks-14671	chr14	78684234	78684473	+	0	NA	intron (NM_001081336, intron 1 of 28)	B4A|SINE|B4	-39902	NR_104044	380921	Mm.89591	NM_001081336	ENSMUSG00000034731	Dgkh	5930402B05Rik|D130015C16|DGK	diacylglycerol kinase, eta	protein-coding
upeaks-38319	chr6	115494765	115494967	+	0	NA	Intergenic	PB1|SINE|Alu	-49838	NM_199033	381802	Mm.291208	NM_199033	ENSMUSG00000042389	Tsen2	AU067695	tRNA splicing endonuclease subunit 2	protein-coding
upeaks-1605	chr1	118776634	118777013	+	0	NA	Intergenic	Intergenic	148878	NM_023755	81879	Mm.24621	NM_023755	ENSMUSG00000026380	Tfcp2l1	1810030F05Rik|4932442M07Rik|AA575098|Cp2l1|Crtr-1|D930018N21Rik|LBP-9|Tcfcp2l1	transcription factor CP2-like 1	protein-coding
upeaks-2468	chr1	164123654	164124000	+	0	NA	intron (NM_011347, intron 2 of 15)	intron (NM_011347, intron 2 of 15)	8563	NM_011347	20344	Mm.3337	NM_011347	ENSMUSG00000026580	Selp	CD62P|GMP-140|Grmp|LECAM3|PADGEM	selectin, platelet	protein-coding
upeaks-10475	chr12	93343023	93343265	+	0	NA	Intergenic	Intergenic	101679	NR_126436	75295	Mm.243878	NR_126436		4930559C10Rik	-	RIKEN cDNA 4930559C10 gene	ncRNA
upeaks-22822	chr19	32256561	32256932	+	0	NA	intron (NM_144792, intron 3 of 9)	intron (NM_144792, intron 3 of 9)	-45733	NM_001168526	208449	Mm.329810	NM_144792	ENSMUSG00000040451	Sgms1	9530058O11Rik|AI841905|C80702|Mob|Sms1|Sor1|Tmem23	sphingomyelin synthase 1	protein-coding
upeaks-46345	chr9	78923483	78924170	+	0	NA	Intergenic	Intergenic	308280	NM_153098	235505	Mm.32955	NM_153098	ENSMUSG00000046186	Cd109	9930012E15Rik|AI480638|GARP	CD109 antigen	protein-coding
upeaks-1742	chr1	127695808	127696007	+	0	NA	Intergenic	Intergenic	-17886	NM_028135	72160	Mm.281287	NM_028135	ENSMUSG00000026347	Tmem163	2610024A01Rik|SV31	transmembrane protein 163	protein-coding
upeaks-46740	chr9	102216743	102216980	+	0	NA	intron (NM_001168296, intron 2 of 14)	intron (NM_001168296, intron 2 of 14)	88114	NR_106163	102466241		NR_106163	ENSMUSG00000098521	Mir7243	Gm27363|mmu-mir-7243	microRNA 7243	ncRNA
upeaks-17758	chr16	34667052	34667520	+	0	NA	intron (NM_030744, intron 2 of 5)	intron (NM_030744, intron 2 of 5)	16075	NM_030744	76378	Mm.23515	NM_030744	ENSMUSG00000022832	Ropn1	1700008N21Rik|ODF6|RHPNAP1|Rppn|ropporin	ropporin, rhophilin associated protein 1	protein-coding
upeaks-15200	chr15	3433249	3433710	+	0	NA	intron (NM_001048178, intron 2 of 8)	intron (NM_001048178, intron 2 of 8)	-129953	NM_001166063	100039139	Mm.455610	NM_001166063	ENSMUSG00000091119	Ccdc152	ENSMUSG00000071814	coiled-coil domain containing 152	protein-coding
upeaks-3762	chr10	30282084	30282325	+	0	NA	Intergenic	L1VL4|LINE|L1	-81664	NM_001109747	66311	Mm.251779	NM_001109747	ENSMUSG00000075266	Cenpw	2610036L11Rik|Cug2	centromere protein W	protein-coding
upeaks-34634	chr5	81761791	81762236	+	0	NA	intron (NM_001347371, intron 21 of 23)	MLT1J1|LTR|ERVL-MaLR	362700	NR_138557	67327	Mm.87058	NR_138557		1700031L13Rik	-	RIKEN cDNA 1700031L13 gene	ncRNA
upeaks-47830	chrX	87899352	87899564	+	0	NA	intron (NM_001160403, intron 1 of 10)	7SLRNA|srpRNA|srpRNA	216165	NM_001160403	331461	Mm.121680	NM_001160403	ENSMUSG00000052372	Il1rapl1	6330532G10Rik|C030039N24|IL1R8|IL1RAPL|MRX34|OPHN4|TIGIRR-2	interleukin 1 receptor accessory protein-like 1	protein-coding
upeaks-5471	chr10	117569555	117569779	+	0	NA	Intergenic	Intergenic	-59833	NM_027468	70574	Mm.339332	NM_027468	ENSMUSG00000020183	Cpm	1110060I01Rik|5730456K23Rik|AA589379|E030045M14Rik	carboxypeptidase M	protein-coding
upeaks-48139	chrX	140375687	140375918	+	0	NA	intron (NM_001320946, intron 4 of 14)	intron (NM_001320946, intron 4 of 14)	8308	NM_177750	245643	Mm.208683	NM_177750	ENSMUSG00000042425	Frmpd3	B930041G04|EG245643|Gm29750	FERM and PDZ domain containing 3	protein-coding
upeaks-40460	chr7	68946231	68946441	+	0	NA	Intergenic	Intergenic	-197098	NM_001042592	66412	Mm.251199	NM_025549	ENSMUSG00000042659	Arrdc4	2410003C09Rik|AV216361	arrestin domain containing 4	protein-coding
upeaks-21197	chr18	36167124	36167331	+	0	NA	intron (NM_001167891, intron 1 of 9)	L2a|LINE|L2	29933	NM_001167891	100042150	Mm.380390	NM_001167891	ENSMUSG00000060275	Nrg2	Don1|NTAK	neuregulin 2	protein-coding
upeaks-21423	chr18	49708462	49708830	+	0	NA	intron (NM_001170960, intron 2 of 3)	intron (NM_001170960, intron 2 of 3)	46955	NM_001170960	68857	Mm.96010	NM_026854	ENSMUSG00000024505	Dtwd2	1190002H09Rik|8030470C17Rik|AI414673|BB115449	DTW domain containing 2	protein-coding
upeaks-44772	chr8	128156064	128156645	+	0	NA	Intergenic	Intergenic	121871	NR_105822	102465212		NR_105822	ENSMUSG00000099326	Mir21c	Gm28013|mmu-mir-21c	microRNA 21c	ncRNA
upeaks-26414	chr2	145232758	145233329	+	0	NA	Intergenic	Intergenic	-9568	NM_053195	94249	Mm.217171	NM_053195	ENSMUSG00000063873	Slc24a3	NCKX3	solute carrier family 24 (sodium/potassium/calcium exchanger), member 3	protein-coding
upeaks-27912	chr3	37639671	37640085	+	0	NA	promoter-TSS (NM_011896)	promoter-TSS (NM_011896)	-69	NM_011896	24063	Mm.330986	NM_011896	ENSMUSG00000037211	Spry1	sprouty1|spry-1	sprouty homolog 1 (Drosophila)	protein-coding
upeaks-17817	chr16	37623895	37624137	+	0	NA	intron (NM_013547, intron 11 of 13)	intron (NM_013547, intron 11 of 13)	30352	NM_026610	68194	Mm.379154	NM_026610	ENSMUSG00000022820	Ndufb4	0610006N12Rik|1300010H20Rik	NADH dehydrogenase (ubiquinone) 1 beta subcomplex 4	protein-coding
upeaks-42269	chr8	5350800	5351017	+	0	NA	Intergenic	ERVB7_3-LTR_MM|LTR|ERVK	-245621	NM_011388	20494	Mm.3500	NM_011388	ENSMUSG00000023073	Slc10a2	9130221J18Rik|AI605518|ASBT|IBAT|ISBT	solute carrier family 10, member 2	protein-coding
upeaks-41939	chr7	138058126	138058343	+	0	NA	Intergenic	RMER5|LTR|ERV1	339496	NM_183289	70571	Mm.334297	NM_183289	ENSMUSG00000091002	Tcerg1l	5730476P14Rik	transcription elongation regulator 1-like	protein-coding
upeaks-40772	chr7	84564628	84564828	+	0	NA	intron (NR_045098, intron 1 of 2)	MLT1D-int|LTR|ERVL-MaLR	35774	NR_045098	100039239	Mm.44882	NR_045098		Gm2115	C77713	predicted gene 2115	ncRNA
upeaks-42968	chr8	47889960	47890445	+	0	NA	intron (NM_133791, intron 4 of 22)	intron (NM_133791, intron 4 of 22)	65720	NM_029383	75677	Mm.390033	NM_029383	ENSMUSG00000038064	Cldn22	2210404A22Rik|5330431C14Rik|9530051B05Rik	claudin 22	protein-coding
upeaks-25055	chr2	79601789	79602197	+	0	NA	Intergenic	Intergenic	-33432	NM_080558	70599	Mm.272881	NM_080558	ENSMUSG00000027007	Ssfa2	5730488C15Rik|CS-1|CS1|KRAP|SPAG13|mKIAA1927	sperm specific antigen 2	protein-coding
upeaks-33611	chr5	13289715	13290036	+	0	NA	Intergenic	L2|LINE|L2	-106909	NM_001243072	20346	Mm.372039	NM_009152	ENSMUSG00000028883	Sema3a	Hsema-I|SEMA1|SemD|Semad|coll-1	sema domain, immunoglobulin domain (Ig), short basic domain, secreted, (semaphorin) 3A	protein-coding
upeaks-34563	chr5	74931774	74932083	+	0	NA	Intergenic	Intergenic	-17266	NR_045866	619945	Mm.359372	NM_001037908	ENSMUSG00000072874	Gm6116	EG619945	predicted gene 6116	ncRNA
upeaks-8052	chr11	95242164	95242363	+	0	NA	Intergenic	Intergenic	-19266	NM_053093	93670	Mm.40085	NM_053093	ENSMUSG00000020872	Tac4	AW489379|PPT-C	tachykinin 4	protein-coding
upeaks-29188	chr3	105494869	105495107	+	0	NA	intron (NM_001039347, intron 2 of 6)	intron (NM_001039347, intron 2 of 6)	36172	NM_019931	56543	Mm.44530	NM_019931	ENSMUSG00000040896	Kcnd3	AW045978|Kncd3|Kv4.3	potassium voltage-gated channel, Shal-related family, member 3	protein-coding
upeaks-46579	chr9	92805488	92805968	+	0	NA	Intergenic	Intergenic	87012	NR_040770	331003	Mm.50805	NR_040770	ENSMUSG00000101734	4933400C23Rik	4933400C23	RIKEN cDNA 4933400C23 gene	ncRNA
upeaks-41333	chr7	112866654	112867051	+	0	NA	intron (NM_009346, intron 9 of 12)	intron (NM_009346, intron 9 of 12)	-87110	NM_175279	78748	Mm.349943	NM_175279	ENSMUSG00000098132	Rassf10	4632411J06Rik	Ras association (RalGDS/AF-6) domain family (N-terminal) member 10	protein-coding
upeaks-40083	chr7	45134444	45134971	+	0	NA	intron (NR_102725, intron 4 of 7)	intron (NR_102725, intron 4 of 7)	1725	NM_013520	14256	Mm.1658	NM_013520	ENSMUSG00000110206	Flt3l	Flt3lg|Ly72L	FMS-like tyrosine kinase 3 ligand	protein-coding
upeaks-15701	chr15	50869487	50869915	+	0	NA	intron (NM_032000, intron 1 of 5)	CpG	19348	NM_001310485	83925	Mm.30466	NM_032000	ENSMUSG00000038679	Trps1	AI115454|AI447310|D15Ertd586e	trichorhinophalangeal syndrome I (human)	protein-coding
upeaks-15890	chr15	61789802	61790422	+	0	NA	Intergenic	Intergenic	-15661	NR_040350	432956	Mm.404918	NR_040350		D030024E09Rik	-	RIKEN cDNA D030024E09 gene	ncRNA
upeaks-11128	chr13	6192043	6192242	+	0	NA	Intergenic	Intergenic	330653	NM_011803	23849	Mm.275036	NM_011803	ENSMUSG00000000078	Klf6	AI448727|BCD1|C86813|CPBP|Copeb|FM2|FM6|Ierepo1|Ierepo3|R75280|Zf9	Kruppel-like factor 6	protein-coding
upeaks-9891	chr12	66289683	66289892	+	0	NA	Intergenic	Intergenic	-5386	NM_001162933	238217	Mm.188575	NM_001162933	ENSMUSG00000060499	Rpl10l	EG238217	ribosomal protein L10-like	protein-coding
upeaks-47629	chrX	48666866	48667157	+	0	NA	TTS (NM_181751)	TTS (NM_181751)	7467	NM_181751	236781	Mm.269129	NM_181751	ENSMUSG00000051209	Gpr119	-	G-protein coupled receptor 119	protein-coding
upeaks-38653	chr6	126006721	126006980	+	0	NA	intron (NM_153589, intron 21 of 25)	intron (NM_153589, intron 21 of 25)	158110	NM_001164035	18205	Mm.267570	NM_008742	ENSMUSG00000049107	Ntf3	AI316846|AI835689|HDNF|NGF-2|Nt3|Ntf-3	neurotrophin 3	protein-coding
upeaks-19200	chr17	26287648	26287847	+	0	NA	Intergenic	PB1|SINE|Alu	34837	NR_037906	66978	Mm.440216	NM_025881	ENSMUSG00000024188	Luc7l	1810045C04Rik|2410018D03Rik	Luc7-like	protein-coding
upeaks-42270	chr8	5448134	5448574	+	0	NA	Intergenic	RLTR13D1|LTR|ERVK	-343067	NM_011388	20494	Mm.3500	NM_011388	ENSMUSG00000023073	Slc10a2	9130221J18Rik|AI605518|ASBT|IBAT|ISBT	solute carrier family 10, member 2	protein-coding
upeaks-26245	chr2	137286270	137286470	+	0	NA	Intergenic	L1MB7|LINE|L1	-169850	NM_013822	16449	Mm.22398	NM_013822	ENSMUSG00000027276	Jag1	ABE2|Gsfabe2|Htu|Ozz|Ser-1	jagged 1	protein-coding
upeaks-34577	chr5	75481631	75481941	+	0	NA	Intergenic	Intergenic	-93201	NM_001122733	16590	Mm.247073	NM_021099	ENSMUSG00000005672	Kit	Bs|CD117|Fdc|Gsfsco1|Gsfsco5|Gsfsow3|SCO1|SCO5|SOW3|Ssm|Tr-kit|W|c-KIT	KIT proto-oncogene receptor tyrosine kinase	protein-coding
upeaks-35516	chr5	122092755	122093204	+	0	NA	Intergenic	Intergenic	-8001	NM_010861	17906	Mm.1529	NM_010861	ENSMUSG00000013936	Myl2	MLC-2|MLC-2s/v|MLC-2v|Mlc2v|Mylpc	myosin, light polypeptide 2, regulatory, cardiac, slow	protein-coding
upeaks-45820	chr9	58691523	58691725	+	0	NA	intron (NM_028598, intron 2 of 5)	intron (NM_028598, intron 2 of 5)	49935	NM_028598	73673	Mm.205196	NM_028598	ENSMUSG00000074269	Rec114	2410076I21Rik|4930527A11Rik	REC114 meiotic recombination protein	protein-coding
upeaks-13828	chr14	32854125	32854358	+	0	NA	Intergenic	PB1|SINE|Alu	-2515	NM_178791	320736	Mm.187910	NM_178791	ENSMUSG00000050666	Vstm4	E130203B14Rik	V-set and transmembrane domain containing 4	protein-coding
upeaks-25040	chr2	78788320	78788594	+	0	NA	Intergenic	MLTR18D_MM|LTR|ERVK	-80590	NM_009454	22193	Mm.1485	NM_009454	ENSMUSG00000027011	Ube2e3	Ubce4|ubcM2	ubiquitin-conjugating enzyme E2E 3	protein-coding
upeaks-44222	chr8	111516612	111516905	+	0	NA	intron (NM_001170742, intron 1 of 25)	intron (NM_001170742, intron 1 of 25)	5349	NM_001170743	319481	Mm.247294	NM_176923	ENSMUSG00000031959	Wdr59	5430401O09Rik|Cdw12	WD repeat domain 59	protein-coding
upeaks-6293	chr11	25057082	25057895	+	0	NA	Intergenic	Intergenic	-268619	NR_045853	71234	Mm.158627	NR_045853	ENSMUSG00000033015	4933427E13Rik	-	RIKEN cDNA 4933427E13 gene	ncRNA
upeaks-417	chr1	37900314	37900627	+	0	NA	Intergenic	ORR1B1|LTR|ERVL-MaLR	9917	NM_027098	107734	Mm.26614	NM_027098	ENSMUSG00000026087	Mrpl30	2310001L22Rik|MRP-L28|Rpml28	mitochondrial ribosomal protein L30	protein-coding
upeaks-14382	chr14	64323630	64324139	+	0	NA	intron (NM_001253712, intron 1 of 5)	intron (NM_001253712, intron 1 of 5)	93072	NM_001253716	110265	Mm.26713	NM_026322	ENSMUSG00000054733	Msra	2310045J23Rik|6530413P12Rik|MSR-A	methionine sulfoxide reductase A	protein-coding
upeaks-6159	chr11	19131660	19131894	+	0	NA	Intergenic	Intergenic	66502	NR_046037	74059	Mm.292321	NR_046037	ENSMUSG00000086025	4933406G16Rik	-	RIKEN cDNA 4933406G16 gene	ncRNA
upeaks-13247	chr13	118594871	118595182	+	0	NA	Intergenic	Intergenic	38858	NR_045982	75890	Mm.141235	NR_045982	ENSMUSG00000100727	1700003P14Rik	1700030O10Rik|4930584L06Rik	RIKEN cDNA 1700003P14 gene	ncRNA
upeaks-2159	chr1	151000660	151001127	+	0	NA	Intergenic	Intergenic	-7458	NM_001024720	545370	Mm.379425	NM_001024720	ENSMUSG00000066842	Hmcn1	EG545370|FIBL-6|Gm201	hemicentin 1	protein-coding
upeaks-42450	chr8	16314605	16314938	+	0	NA	intron (NM_053171, intron 10 of 69)	intron (NM_053171, intron 10 of 69)	-145933	NR_037214	100526464		NR_037214	ENSMUSG00000093142	Mir3106	mir-3106|mmu-mir-3106	microRNA 3106	ncRNA
upeaks-47982	chrX	106040811	106041023	+	0	NA	intron (NM_001109757, intron 1 of 22)	B1_Mur4|SINE|Alu	13693	NM_009726	11977	Mm.254297	NM_009726	ENSMUSG00000033792	Atp7a	MNK	ATPase, Cu++ transporting, alpha polypeptide	protein-coding
upeaks-23491	chr2	3088350	3088612	+	0	NA	Intergenic	L1_Mus3|LINE|L1	-25743	NM_001310434	269233	Mm.23044	NM_001081161	ENSMUSG00000050530	Fam171a1	9630050M13Rik|AA409679	family with sequence similarity 171, member A1	protein-coding
upeaks-5185	chr10	100039688	100040299	+	0	NA	intron (NM_001347156, intron 1 of 8)	intron (NM_001347156, intron 1 of 8)	24172	NM_001347156	17311	Mm.45124	NM_013598	ENSMUSG00000019966	Kitl	Clo|Con|Gb|Kitlg|Mgf|SCF|SF|SLF|Sl|blz|contrasted	kit ligand	protein-coding
upeaks-12789	chr13	95657150	95657369	+	0	NA	intron (NM_027711, intron 28 of 35)	intron (NM_027711, intron 28 of 35)	-38826	NM_010169	14062	Mm.24816	NM_010169	ENSMUSG00000048376	F2r	AI482343|Cf2r|Par1|ThrR	coagulation factor II (thrombin) receptor	protein-coding
upeaks-11879	chr13	46583046	46583277	+	0	NA	intron (NM_026056, intron 4 of 12)	ID_B1|SINE|B4	81258	NM_026056	67252	Mm.44529	NM_026056	ENSMUSG00000021373	Cap2	2810452G09Rik|AV045235	CAP, adenylate cyclase-associated protein, 2 (yeast)	protein-coding
upeaks-26342	chr2	142253993	142254289	+	0	NA	intron (NM_001013802, intron 11 of 18)	intron (NM_001013802, intron 11 of 18)	647323	NM_001081133	16558	Mm.251934	NM_001081133	ENSMUSG00000038844	Kif16b	8430434E15Rik|AA623607|AI789011|C80253|C80902|mKIAA1590	kinesin family member 16B	protein-coding
upeaks-2815	chr1	176573600	176574040	+	0	NA	Intergenic	Intergenic	198603	NR_029775	723921		NR_029775	ENSMUSG00000065573	Mir350	Mirn350|mir-350|mmu-mir-350	microRNA 350	ncRNA
upeaks-48306	chrX	161926183	161926680	+	0	NA	intron (NM_001081052, intron 1 of 7)	intron (NM_001081052, intron 1 of 7)	208878	NM_198409	24004	Mm.328503	NM_198409	ENSMUSG00000043518	Rai2	3f8	retinoic acid induced 2	protein-coding
upeaks-42817	chr8	36394593	36394824	+	0	NA	Intergenic	Intergenic	-94483	NM_176952	319582	Mm.180924	NM_176952	ENSMUSG00000039620	6430573F11Rik	Kiaa1456|TRM9L	RIKEN cDNA 6430573F11 gene	protein-coding
upeaks-25920	chr2	125419881	125420137	+	0	NA	intron (NM_007993, intron 6 of 65)	intron (NM_007993, intron 6 of 65)	86429	NM_007993	14118	Mm.271644	NM_007993	ENSMUSG00000027204	Fbn1	AI536462|B430209H23|Fib-1|Tsk	fibrillin 1	protein-coding
upeaks-21314	chr18	41856489	41856725	+	0	NA	Intergenic	ERVB4_1C-LTR_Mm|LTR|ERVK	94587	NM_029942	77619	Mm.30649	NM_029942	ENSMUSG00000056671	Prelid2	1700003A01Rik|C330008K14Rik	PRELI domain containing 2	protein-coding
upeaks-3446	chr10	9957604	9957993	+	0	NA	Intergenic	Intergenic	-56758	NM_001081344	78808	Mm.331751	NM_030191	ENSMUSG00000019790	Stxbp5	0710001E20Rik|4930565N16Rik|AW742610|LGL3|mKIAA1006	syntaxin binding protein 5 (tomosyn)	protein-coding
upeaks-22041	chr18	80094708	80095019	+	0	NA	intron (NM_053117, intron 2 of 2)	intron (NM_053117, intron 2 of 2)	47968	NM_053117	93737	Mm.24678	NM_053117	ENSMUSG00000056214	Pard6g	2410049N21Rik|Par6a	par-6 family cell polarity regulator gamma	protein-coding
upeaks-4388	chr10	68795536	68795801	+	0	NA	Intergenic	Intergenic	71922	NM_177794	327766	Mm.2479	NM_177794	ENSMUSG00000060044	Tmem26	3230401A06|AI195372	transmembrane protein 26	protein-coding
upeaks-35171	chr5	111823942	111824161	+	0	NA	Intergenic	Intergenic	-62323	NR_045832	269683	Mm.136946	NM_207252	ENSMUSG00000085271	E130006D01Rik	Gm16018|Gm681|OTTMUSG00000029083	RIKEN cDNA E130006D01 gene	ncRNA
upeaks-16811	chr15	97587334	97587559	+	0	NA	Intergenic	7SLRNA|srpRNA|srpRNA	118376	NM_028003	71919	Mm.12255	NM_028003	ENSMUSG00000022466	Rpap3	2310042P20Rik|D15Ertd682e	RNA polymerase II associated protein 3	protein-coding
upeaks-22795	chr19	30461705	30462205	+	0	NA	Intergenic	Intergenic	77724	NR_003650	546723	Mm.301509	NM_001037169		Ppp1r2-ps3	EG546723|Gm5972	protein phosphatase 1, regulatory (inhibitor) subunit 2, pseudogene 3	pseudo
upeaks-2754	chr1	172989838	172990047	+	0	NA	Intergenic	Intergenic	33174	NM_008763	18313	Mm.377103	NM_008763	ENSMUSG00000037924	Olfr16	MOR23|MOR26713	olfactory receptor 16	protein-coding
upeaks-33099	chr4	145679457	145679656	+	0	NA	intron (NM_001103158, intron 2 of 4)	intron (NM_001103158, intron 2 of 4)	8859	NM_001103158	100041379	Mm.276881	NM_001103158	ENSMUSG00000058186	Zfp980	Gm13242|OTTMUSG00000011070	zinc finger protein 980	protein-coding
upeaks-42275	chr8	7362914	7363184	+	0	NA	Intergenic	Lx|LINE|L1	1297724	NM_010111	13642	Mm.209813	NM_010111	ENSMUSG00000001300	Efnb2	ELF-2|Epl5|Eplg5|Htk-L|LERK-5|Lerk5|NLERK-1	ephrin B2	protein-coding
upeaks-6018	chr11	8641694	8642055	+	0	NA	intron (NM_001083587, intron 1 of 30)	intron (NM_001083587, intron 1 of 30)	22661	NM_001083587	319939	Mm.337820	NM_001083587	ENSMUSG00000020422	Tns3	BC023928|F830010I22Rik|TEM6|Tens1	tensin 3	protein-coding
upeaks-27225	chr2	170878932	170879367	+	0	NA	intron (NM_001163686, intron 7 of 7)	intron (NM_001163686, intron 7 of 7)	147342	NM_029761	76829	Mm.41633	NM_029761	ENSMUSG00000027560	Dok5	2700055C10Rik	docking protein 5	protein-coding
upeaks-25938	chr2	126014981	126015352	+	0	NA	intron (NM_029455, intron 11 of 16)	intron (NM_029455, intron 11 of 16)	-19492	NM_008008	14178	Mm.330557	NM_008008	ENSMUSG00000027208	Fgf7	Kgf	fibroblast growth factor 7	protein-coding
upeaks-14731	chr14	86786872	86787177	+	0	NA	intron (NM_019670, intron 25 of 27)	intron (NM_019670, intron 25 of 27)	354090	NM_019670	56419	Mm.440585	NM_019670	ENSMUSG00000022021	Diaph3	4930417P13Rik|Dia2|Diap3|Drf3|mDia2|mKIAA4117|p134MDia2	diaphanous related formin 3	protein-coding
upeaks-35594	chr5	124161841	124162215	+	0	NA	intron (NM_011256, intron 2 of 24)	intron (NM_011256, intron 2 of 24)	25154	NM_001289472	19679	Mm.44261	NM_011256	ENSMUSG00000029406	Pitpnm2	NIR3|RDGBA2|Rdgb2|mKIAA1457	phosphatidylinositol transfer protein, membrane-associated 2	protein-coding
upeaks-27911	chr3	37480105	37480304	+	0	NA	intron (NM_001310473, intron 14 of 16)	B1_Mus2|SINE|Alu	60254	NM_001163511	57815	Mm.172679	NM_021343	ENSMUSG00000027722	Spata5	2510048F20Rik|C78064|Spaf	spermatogenesis associated 5	protein-coding
upeaks-13844	chr14	33476043	33476306	+	0	NA	Intergenic	Intergenic	-29016	NM_001310453	26419	Mm.21495	NM_016700	ENSMUSG00000021936	Mapk8	AI849689|JNK|JNK1|Prkm8|SAPK1	mitogen-activated protein kinase 8	protein-coding
upeaks-9700	chr12	45833696	45834150	+	0	NA	Intergenic	Intergenic	-759440	NM_144552	217517	Mm.285400	NM_144552	ENSMUSG00000046314	Stxbp6	BC024598|C85317	syntaxin binding protein 6 (amisyn)	protein-coding
upeaks-34440	chr5	66915984	66916578	+	0	NA	intron (NM_001001980, intron 3 of 25)	intron (NM_001001980, intron 3 of 25)	-52135	NM_001256122	77569	Mm.374778	NM_001001980	ENSMUSG00000037736	Limch1	3732412D22Rik|mKIAA1102	LIM and calponin homology domains 1	protein-coding
upeaks-29789	chr3	134875606	134875807	+	0	NA	intron (NM_021382, intron 3 of 4)	intron (NM_021382, intron 3 of 4)	46699	NM_021382	21338	Mm.103810	NM_021382	ENSMUSG00000028172	Tacr3	Nk3r|Nkr|Tac3r	tachykinin receptor 3	protein-coding
upeaks-34611	chr5	77165665	77165946	+	0	NA	Intergenic	Intergenic	45400	NM_001289767	69982	Mm.46106	NM_183284	ENSMUSG00000053030	Spink2	1700007F22Rik|AV038945|HUSI-II	serine peptidase inhibitor, Kazal type 2	protein-coding
upeaks-30246	chr3	154703963	154704220	+	0	NA	Intergenic	Intergenic	-7042	NM_175176	209601	Mm.331454	NM_175176	ENSMUSG00000078161	Erich3	1700013E18Rik|4922501L14Rik|5031409G23Rik|AI596448|Gm133	glutamate rich 3	protein-coding
upeaks-2634	chr1	169980668	169981047	+	0	NA	intron (NM_022563, intron 16 of 16)	ERVB7_4-LTR_MM|LTR|ERVK	11448	NR_040438	67303	Mm.396611	NR_040438	ENSMUSG00000097503	3110045C21Rik	AI838577	RIKEN cDNA 3110045C21 gene	ncRNA
upeaks-3666	chr10	23480569	23480775	+	0	NA	Intergenic	PB1|SINE|Alu	-130729	NM_010167	14051	Mm.332128	NM_010167	ENSMUSG00000010461	Eya4	B130023L16Rik	EYA transcriptional coactivator and phosphatase 4	protein-coding
upeaks-6223	chr11	21399040	21399751	+	0	NA	Intergenic	Intergenic	-28128	NM_001290634	216558	Mm.28877	NM_139297	ENSMUSG00000001891	Ugp2	UDPGP|UGPase	UDP-glucose pyrophosphorylase 2	protein-coding
upeaks-11808	chr13	42720766	42720965	+	0	NA	intron (NM_001005740, intron 1 of 12)	intron (NM_001005740, intron 1 of 12)	11284	NM_001005740	218194	Mm.160124	NM_198419	ENSMUSG00000054728	Phactr1	9630030F18Rik|Rpel1	phosphatase and actin regulator 1	protein-coding
upeaks-2052	chr1	136725225	136725567	+	0	NA	non-coding (NR_037986, exon 5 of 5)	non-coding (NR_037986, exon 5 of 5)	29185	NR_037986	100503474	Mm.428276	NR_037986		Platr22	Gm16880	pluripotency associated transcript 22	ncRNA
upeaks-30655	chr4	29038705	29038941	+	0	NA	Intergenic	Lx|LINE|L1	225678	NM_001122889	13841	Mm.257266	NM_010141	ENSMUSG00000028289	Epha7	Cek11|Ebk|Ehk3|Hek11|Mdk1	Eph receptor A7	protein-coding
upeaks-29492	chr3	121891391	121891700	+	0	NA	Intergenic	Intergenic	-61781	NM_172525	214137	Mm.229287	NM_172525	ENSMUSG00000039831	Arhgap29	6720461J18Rik|A830014I19|AU040217|B130017I01Rik|C76601|Parg1	Rho GTPase activating protein 29	protein-coding
upeaks-14888	chr14	103680461	103680889	+	0	NA	intron (NM_198014, intron 2 of 6)	intron (NM_198014, intron 2 of 6)	18757	NR_045148	70898	Mm.27548	NR_045148	ENSMUSG00000089707	Slain1os	4921525B02Rik	SLAIN motif family, member 1, opposite strand	ncRNA
upeaks-40985	chr7	98900250	98900470	+	0	NA	intron (NM_178635, intron 14 of 14)	intron (NM_178635, intron 14 of 14)	61515	NM_001285795	22411	Mm.22182	NM_009519	ENSMUSG00000015957	Wnt11	-	wingless-type MMTV integration site family, member 11	protein-coding
upeaks-44661	chr8	124780252	124780630	+	0	NA	Intergenic	Intergenic	-12578	NM_198632	330863	Mm.422769	NM_198632	ENSMUSG00000036913	Trim67	D130049O21Rik|TNL	tripartite motif-containing 67	protein-coding
upeaks-36730	chr6	29064392	29064618	+	0	NA	intron (NM_008493, intron 1 of 2)	L1MA4|LINE|L1	4284	NM_008493	16846	Mm.277072	NM_008493	ENSMUSG00000059201	Lep	ob|obese	leptin	protein-coding
upeaks-8481	chr11	103814974	103815196	+	0	NA	intron (NM_009521, intron 4 of 4)	intron (NM_009521, intron 4 of 4)	40910	NM_009521	22415	Mm.159091	NM_009521	ENSMUSG00000000125	Wnt3	Int-4|Wnt-3	wingless-type MMTV integration site family, member 3	protein-coding
upeaks-38512	chr6	121194027	121194573	+	0	NA	3' UTR (NM_028730, exon 5 of 5)	3' UTR (NM_028730, exon 5 of 5)	10633	NM_001304773	74043	Mm.491240	NM_028730	ENSMUSG00000067825	Pex26	4632428M11Rik	peroxisomal biogenesis factor 26	protein-coding
upeaks-31599	chr4	95156821	95157352	+	0	NA	Intergenic	Intergenic	-104864	NM_010591	16476	Mm.275071	NM_010591	ENSMUSG00000052684	Jun	AP-1|Junc|c-jun	jun proto-oncogene	protein-coding
upeaks-18858	chr17	10473898	10474566	+	0	NA	TTS (NR_077239)	TTS (NR_077239)	18016	NR_077239	319750	Mm.383485	NR_077237	ENSMUSG00000089633	A230009B12Rik	-	RIKEN cDNA A230009B12 gene	ncRNA
upeaks-856	chr1	71488466	71489021	+	0	NA	Intergenic	MLTR14|LTR|ERV1	-68413	NM_026195	108147	Mm.38010	NM_026195	ENSMUSG00000026192	Atic	2610509C24Rik|AA536954|AW212393	5-aminoimidazole-4-carboxamide ribonucleotide formyltransferase/IMP cyclohydrolase	protein-coding
upeaks-27866	chr3	34721586	34721793	+	0	NA	Intergenic	B1F1|SINE|Alu	-5027	NR_038348	100041108	Mm.24764	NR_038347	ENSMUSG00000105153	Gm3143	-	predicted gene 3143	ncRNA
upeaks-38798	chr6	133387365	133387574	+	0	NA	Intergenic	Lx2|LINE|L1	95253	NM_027784	232426	Mm.158689	NM_027784	ENSMUSG00000055594	5530400C23Rik	GRP	RIKEN cDNA 5530400C23 gene	protein-coding
upeaks-9759	chr12	52854406	52854775	+	0	NA	intron (NM_198111, intron 2 of 13)	intron (NM_198111, intron 2 of 13)	155207	NM_198111	238161	Mm.310822	NM_198111	ENSMUSG00000061603	Akap6	AI482140|Akapalpha|Akapbeta|PRKA	A kinase (PRKA) anchor protein 6	protein-coding
upeaks-44377	chr8	119465098	119465327	+	0	NA	exon (NM_054095, exon 8 of 13)	exon (NM_054095, exon 8 of 13)	18493	NM_054095	117148	Mm.356184	NM_054095	ENSMUSG00000031837	Necab2	Efcbp2	N-terminal EF-hand calcium binding protein 2	protein-coding
upeaks-9669	chr12	41556619	41556871	+	0	NA	intron (NM_053122, intron 4 of 6)	intron (NM_053122, intron 4 of 6)	-70688	NM_010733	16981	Mm.404786	NM_010733	ENSMUSG00000036295	Lrrn3	NLRR-3	leucine rich repeat protein 3, neuronal	protein-coding
upeaks-6778	chr11	51952011	51952293	+	0	NA	Intergenic	RMER5|LTR|ERV1	-15479	NM_029976	52626	Mm.289456	NM_029976	ENSMUSG00000020392	Cdkn2aipnl	A430101B06Rik|AA409260|D11Ertd497e|MNCb-1520	CDKN2A interacting protein N-terminal like	protein-coding
upeaks-14967	chr14	107298022	107298303	+	0	NA	Intergenic	Intergenic	-811642	NR_045938	73631	Mm.48862	NR_045938	ENSMUSG00000099794	1700128A07Rik	-	RIKEN cDNA 1700128A07 gene	ncRNA
upeaks-26256	chr2	137684100	137684406	+	0	NA	Intergenic	MLT1H1|LTR|ERVL-MaLR	-567733	NM_013822	16449	Mm.22398	NM_013822	ENSMUSG00000027276	Jag1	ABE2|Gsfabe2|Htu|Ozz|Ser-1	jagged 1	protein-coding
upeaks-40768	chr7	84328900	84329187	+	0	NA	intron (NM_007488, intron 5 of 18)	intron (NM_007488, intron 5 of 18)	80995	NM_007488	11864	Mm.38594	NM_007488	ENSMUSG00000015709	Arnt2	Hif-2b|bHLHe1|mKIAA0307	aryl hydrocarbon receptor nuclear translocator 2	protein-coding
upeaks-41153	chr7	105545375	105545616	+	0	NA	Intergenic	RLTR18|LTR|ERVK	-8865	NM_011421	20597	Mm.4628	NM_011421	ENSMUSG00000037049	Smpd1	A-SMase|ASM|Zn-SMase|aSMase	sphingomyelin phosphodiesterase 1, acid lysosomal	protein-coding
upeaks-740	chr1	62398118	62398547	+	0	NA	intron (NM_001081050, intron 18 of 22)	L3|LINE|CR1	-304985	NM_001077405	18187	Mm.266341	NM_010939	ENSMUSG00000025969	Nrp2	1110048P06Rik|Np-2|Np2|Npn-2|Npn2	neuropilin 2	protein-coding
upeaks-43457	chr8	77481801	77482065	+	0	NA	intron (NM_030113, intron 1 of 22)	intron (NM_030113, intron 1 of 22)	-35123	NR_028125	70345	Mm.411813	NR_028125	ENSMUSG00000097882	0610038B21Rik	-	RIKEN cDNA 0610038B21 gene	ncRNA
upeaks-45725	chr9	56069961	56070160	+	0	NA	Intergenic	Intergenic	-19916	NM_011193	19200	Mm.2534	NM_011193	ENSMUSG00000032322	Pstpip1	CD2BP1|def-2	proline-serine-threonine phosphatase-interacting protein 1	protein-coding
upeaks-40923	chr7	96661392	96662129	+	0	NA	intron (NM_001310760, intron 6 of 32)	intron (NM_001310760, intron 6 of 32)	139789	NR_045874	791381	Mm.402112	NR_045874	ENSMUSG00000053049	Gm15413	ENSMUSG00000053049|OTTMUSG00000021246	predicted gene 15413	ncRNA
upeaks-26317	chr2	140759760	140760033	+	0	NA	intron (NM_001013802, intron 3 of 18)	intron (NM_001013802, intron 3 of 18)	-88420	NM_001172160	71436	Mm.426781	NM_178382	ENSMUSG00000051379	Flrt3	5530600M07Rik|C430047I10Rik|mKIAA1469	fibronectin leucine rich transmembrane protein 3	protein-coding
upeaks-18342	chr16	78462272	78462555	+	0	NA	Intergenic	(CCCCCT)n|Simple_repeat|Simple_repeat	-85232	NM_001297747	12228	Mm.392910	NM_009770	ENSMUSG00000022863	Btg3	ANA|tob5	B cell translocation gene 3	protein-coding
upeaks-29089	chr3	102083771	102084110	+	0	NA	Intergenic	Intergenic	-2515	NM_009814	12373	Mm.15343	NM_009814	ENSMUSG00000027861	Casq2	AA033488|AW146219|Csq2|ESTM52|cCSQ	calsequestrin 2	protein-coding
upeaks-781	chr1	64381352	64381551	+	0	NA	Intergenic	Intergenic	-151353	NM_009952	12912	Mm.422634	NM_009952	ENSMUSG00000025958	Creb1	2310001E10Rik|3526402H21Rik|AV083133|Creb|Creb-1	cAMP responsive element binding protein 1	protein-coding
upeaks-41761	chr7	129774383	129774777	+	0	NA	Intergenic	Intergenic	182717	NM_172255	207425	Mm.229323	NM_172255	ENSMUSG00000042055	Wdr11	2900055P10Rik|AW489876|Brwd2|mKIAA1351	WD repeat domain 11	protein-coding
upeaks-44488	chr8	121280564	121280806	+	0	NA	Intergenic	Intergenic	153000	NM_008024	14241	Mm.5111	NM_008024	ENSMUSG00000097084	Foxl1	FREAC7|Fkh6|fkh-6	forkhead box L1	protein-coding
upeaks-13101	chr13	111797962	111798225	+	0	NA	intron (NM_011945, intron 1 of 19)	intron (NM_011945, intron 1 of 19)	10890	NM_011945	26401	Mm.15918	NM_011945	ENSMUSG00000021754	Map3k1	MAPKKK1|MEKK1|Mekk	mitogen-activated protein kinase kinase kinase 1	protein-coding
upeaks-20842	chr18	10103128	10103536	+	0	NA	intron (NM_009071, intron 16 of 32)	intron (NM_009071, intron 16 of 32)	-73183	NM_021522	59025	Mm.329277	NM_021522	ENSMUSG00000047879	Usp14	2610005K12Rik|2610037B11Rik|AW107924|C78769|ax|nmf375	ubiquitin specific peptidase 14	protein-coding
upeaks-18015	chr16	50009734	50009934	+	0	NA	Intergenic	Intergenic	29374	NR_045001	628951	Mm.428032	NR_045001		Gm6936	-	predicted gene 6936	ncRNA
upeaks-20103	chr17	63839695	63839897	+	0	NA	Intergenic	MLT1A0|LTR|ERVL-MaLR	-24185	NM_001037997	14158	Mm.23039	NM_008000	ENSMUSG00000000127	Fer	AV082135|C330004K01Rik|Fert|Fert2	fer (fms/fps related) protein kinase	protein-coding
upeaks-1461	chr1	98309891	98310343	+	0	NA	Intergenic	RLTR34C_MM|LTR|ERVK	-111007	NM_001164233	70866	Mm.389164	NM_027584	ENSMUSG00000026336	Slco6d1	4921511I05Rik	solute carrier organic anion transporter family, member 6d1	protein-coding
upeaks-41152	chr7	105516654	105517096	+	0	NA	Intergenic	Intergenic	-34678	NM_028444	109042	Mm.3124	NM_028444	ENSMUSG00000037060	Prkcdbp	3110015B12Rik|6330514M23Rik|SRBC	protein kinase C, delta binding protein	protein-coding
upeaks-25	chr1	5108513	5108924	+	0	NA	intron (NM_133826, intron 7 of 13)	IAPLTR2b|LTR|ERVK	25632	NM_133826	108664	Mm.27082	NM_133826	ENSMUSG00000033793	Atp6v1h	0710001F19Rik|AU022349|CGI-11|SFD|SFDalpha|SFDbeta|VMA13	ATPase, H+ transporting, lysosomal V1 subunit H	protein-coding
upeaks-8755	chr11	113898703	113898988	+	0	NA	intron (NM_172800, intron 3 of 44)	intron (NM_172800, intron 3 of 44)	-147030	NM_001163346	56699	Mm.293378	NM_020006	ENSMUSG00000041598	Cdc42ep4	1500041M20Rik|Borg4|CEP4	CDC42 effector protein (Rho GTPase binding) 4	protein-coding
upeaks-37254	chr6	54258004	54258242	+	0	NA	intron (NM_001163640, intron 6 of 12)	intron (NM_001163640, intron 6 of 12)	-6735	NM_001311133	69993	Mm.321147	NM_023543	ENSMUSG00000004633	Chn2	1700026N20Rik|4930557O16Rik|ARHGAP3|Bch	chimerin 2	protein-coding
upeaks-26526	chr2	148878698	148878979	+	0	NA	Intergenic	Intergenic	-3326	NM_009976	13010	Mm.4263	NM_009976	ENSMUSG00000027447	Cst3	CysC	cystatin C	protein-coding
upeaks-20745	chr18	3768353	3768689	+	0	NA	Intergenic	Intergenic	260564	NM_026505	68010	Mm.284863	NM_026505	ENSMUSG00000024232	Bambi	2610003H06Rik	BMP and activin membrane-bound inhibitor	protein-coding
upeaks-17428	chr16	20072789	20072992	+	0	NA	Intergenic	Intergenic	-24664	NM_029436	75785	Mm.392450	NM_029436	ENSMUSG00000062901	Klhl24	1110046J11Rik|4930429H24Rik|6530402O20Rik|C85082	kelch-like 24	protein-coding
upeaks-14302	chr14	60904330	60905038	+	0	NA	intron (NR_040642, intron 19 of 19)	intron (NR_040642, intron 19 of 19)	120118	NM_027436	70478	Mm.274650	NM_027436	ENSMUSG00000021993	Mipep	5730405E07Rik|MIP	mitochondrial intermediate peptidase	protein-coding
upeaks-18315	chr16	77417889	77418089	+	0	NA	intron (NR_015543, intron 2 of 4)	intron (NR_015543, intron 2 of 4)	88661	NR_015543	77994	Mm.394688	NR_015543	ENSMUSG00000090386	Mir99ahg	2810055G20Rik|D730043B02Rik	Mir99a and Mirlet7c-1 host gene (non-protein coding)	ncRNA
upeaks-34743	chr5	92128566	92128965	+	0	NA	Intergenic	ORR1C2|LTR|ERVL-MaLR	-9173	NM_019490	56041	Mm.15868	NM_019490	ENSMUSG00000029407	Uso1	115kDa|TAP|Vdp	USO1 vesicle docking factor	protein-coding
upeaks-12644	chr13	88828372	88828833	+	0	NA	intron (NM_010103, intron 1 of 9)	intron (NM_010103, intron 1 of 9)	7130	NM_010103	13612	Mm.125580	NM_010103	ENSMUSG00000034488	Edil3	Del-1|Del1	EGF-like repeats and discoidin I-like domains 3	protein-coding
upeaks-23223	chr19	47343525	47343727	+	0	NA	intron (NM_001164717, intron 5 of 13)	CpG	-70037	NR_105961	102466782		NR_105961	ENSMUSG00000098786	Mir6995	Gm27576|mmu-mir-6995	microRNA 6995	ncRNA
upeaks-11120	chr13	5892129	5892997	+	0	NA	Intergenic	Intergenic	31074	NM_011803	23849	Mm.275036	NM_011803	ENSMUSG00000000078	Klf6	AI448727|BCD1|C86813|CPBP|Copeb|FM2|FM6|Ierepo1|Ierepo3|R75280|Zf9	Kruppel-like factor 6	protein-coding
upeaks-406	chr1	37314418	37314719	+	0	NA	intron (NM_001290797, intron 1 of 25)	intron (NM_001290797, intron 1 of 25)	14730	NM_030266	269180	Mm.5294	NM_030266	ENSMUSG00000026113	Inpp4a	107kDa|9630012D15|D130048C09Rik|R74740	inositol polyphosphate-4-phosphatase, type I	protein-coding
upeaks-30732	chr4	34231330	34231620	+	0	NA	Intergenic	Intergenic	-181408	NM_026293	67652	Mm.55848	NM_026293	ENSMUSG00000028264	Spaca1	1700124L11Rik|4930540L03Rik	sperm acrosome associated 1	protein-coding
upeaks-13917	chr14	40791685	40791926	+	0	NA	Intergenic	Intergenic	101160	NM_177816	328381	Mm.235694	NM_177816	ENSMUSG00000037833	Sh2d4b	A430109M18Rik|D030001E08	SH2 domain containing 4B	protein-coding
upeaks-26341	chr2	142242464	142242856	+	0	NA	intron (NM_001013802, intron 11 of 18)	intron (NM_001013802, intron 11 of 18)	658804	NM_001081133	16558	Mm.251934	NM_001081133	ENSMUSG00000038844	Kif16b	8430434E15Rik|AA623607|AI789011|C80253|C80902|mKIAA1590	kinesin family member 16B	protein-coding
upeaks-21094	chr18	32416135	32416406	+	0	NA	intron (NM_009668, intron 7 of 18)	intron (NM_009668, intron 7 of 18)	-37986	NR_045403	402767	Mm.385109	NR_045403	ENSMUSG00000097413	A830052D11Rik	-	RIKEN cDNA A830052D11 gene	ncRNA
upeaks-40294	chr7	59624350	59624573	+	0	NA	intron (NR_015351, intron 5 of 5)	B1_Mus2|SINE|Alu	51618	NR_033778	64244		NR_033778	ENSMUSG00000096475	Snord116l1	Pwcr1l1	small nucleolar RNA, C/D box 116-like 1	snoRNA
upeaks-13091	chr13	111397477	111398032	+	0	NA	Intergenic	Intergenic	92287	NM_028487	73274	Mm.57286	NM_028487	ENSMUSG00000032745	Gpbp1	1700034P14Rik|AU019836|D230035M11Rik|Gpbp|mGPBP	GC-rich promoter binding protein 1	protein-coding
upeaks-24488	chr2	47299646	47299851	+	0	NA	Intergenic	PB1|SINE|Alu	-1514361	NM_007396	11480	Mm.314338	NM_007396	ENSMUSG00000052155	Acvr2a	ActrIIa|Acvr2|TactrII	activin receptor IIA	protein-coding
upeaks-27078	chr2	166894801	166895001	+	0	NA	3' UTR (NM_001085495, exon 39 of 39)	3' UTR (NM_001085495, exon 39 of 39)	-11195	NM_023565	110750	Mm.22417	NM_023565	ENSMUSG00000002718	Cse1l	2610100P18Rik|AA407533|Capts|Cas|Xpo2	chromosome segregation 1-like (S. cerevisiae)	protein-coding
upeaks-20182	chr17	67777007	67777210	+	0	NA	intron (NM_008480, intron 29 of 62)	intron (NM_008480, intron 29 of 62)	79843	NM_008480	16772	Mm.303386	NM_008480	ENSMUSG00000032796	Lama1	AA408497|Lama	laminin, alpha 1	protein-coding
upeaks-9940	chr12	70506520	70506737	+	0	NA	intron (NR_037248, intron 2 of 4)	intron (NR_037248, intron 2 of 4)	53474	NM_028339	72736	Mm.204670	NM_028339	ENSMUSG00000021072	Tmx1	2810425A04Rik|AI465319|Txndc1	thioredoxin-related transmembrane protein 1	protein-coding
upeaks-33648	chr5	16658422	16658698	+	0	NA	Intergenic	RMER16B|LTR|ERVK	104659	NM_001289461	15234	Mm.267078	NM_010427	ENSMUSG00000028864	Hgf	C230052L06Rik|HGF/SF|NK1|NK2|SF|SF/HGF	hepatocyte growth factor	protein-coding
upeaks-3768	chr10	30548495	30548798	+	0	NA	intron (NM_028604, intron 11 of 12)	Tigger12|DNA|TcMar-Tigger	52103	NM_028604	73681	Mm.294503	NM_028604	ENSMUSG00000019792	Trmt11	2410075D05Rik|3110045I18Rik|AW213713	tRNA methyltransferase 11	protein-coding
upeaks-11114	chr13	5803825	5804051	+	0	NA	Intergenic	Intergenic	54154	NR_045891	71867	Mm.179181	NR_045891	ENSMUSG00000100625	1700016G22Rik	-	RIKEN cDNA 1700016G22 gene	ncRNA
upeaks-44331	chr8	117157564	117158643	+	0	NA	promoter-TSS (NM_001081151)	promoter-TSS (NM_001081151)	-32	NM_001081151	209239	Mm.132992	NM_001081151	ENSMUSG00000052557	Gan	A330045G18|gigaxonin	giant axonal neuropathy	protein-coding
upeaks-1570	chr1	115558585	115558923	+	0	NA	Intergenic	ERVB4_1B-LTR_MM|LTR|ERVK	-126383	NM_001077425	636808	Mm.101576	NM_001077425	ENSMUSG00000070695	Cntnap5a	Caspr5-1|EG636808	contactin associated protein-like 5A	protein-coding
upeaks-9646	chr12	40016917	40017463	+	0	NA	Intergenic	Intergenic	20186	NM_007487	11861	Mm.12723	NM_007487	ENSMUSG00000047446	Arl4a	AI467555|Arl4	ADP-ribosylation factor-like 4A	protein-coding
upeaks-27536	chr3	6049559	6049924	+	0	NA	Intergenic	Intergenic	-473493	NM_008994	19302	Mm.132336	NM_008994	ENSMUSG00000040374	Pex2	D3Ertd138e|PAF-1|PMP35|Pxmp3	peroxisomal biogenesis factor 2	protein-coding
upeaks-23269	chr19	52428847	52429054	+	0	NA	Intergenic	Intergenic	164653	NM_008386	16333	Mm.46269	NM_008386	ENSMUSG00000035804	Ins1	Ins-1|Ins2-rs1	insulin I	protein-coding
upeaks-18240	chr16	71867029	71867228	+	0	NA	Intergenic	L1_Mus4|LINE|L1	367199	NR_131116	319533	Mm.373754	NR_131115		8030451O07Rik	-	RIKEN cDNA 8030451O07 gene	ncRNA
upeaks-36536	chr6	10186302	10186538	+	0	NA	Intergenic	(GAATG)n|Simple_repeat|Simple_repeat	787958	NR_033776	57866	Mm.4397	NR_033776		AA545190	-	EST AA545190	ncRNA
upeaks-38649	chr6	125876837	125877322	+	0	NA	intron (NM_153589, intron 13 of 25)	(CACTC)n|Simple_repeat|Simple_repeat	186660	NM_153589	243634	Mm.333398	NM_153589	ENSMUSG00000038115	Ano2	BC033409|Tmem16b	anoctamin 2	protein-coding
upeaks-6294	chr11	25063922	25064144	+	0	NA	Intergenic	Intergenic	-262074	NR_045853	71234	Mm.158627	NR_045853	ENSMUSG00000033015	4933427E13Rik	-	RIKEN cDNA 4933427E13 gene	ncRNA
upeaks-22936	chr19	40244531	40244773	+	0	NA	intron (NM_016861, intron 3 of 6)	L1_Mus3|LINE|L1	26964	NM_016861	54132	Mm.5567	NM_016861	ENSMUSG00000055044	Pdlim1	CLP36|Clim1|mClim1	PDZ and LIM domain 1 (elfin)	protein-coding
upeaks-45278	chr9	35017657	35017925	+	0	NA	intron (NM_001190913, intron 10 of 13)	intron (NM_001190913, intron 10 of 13)	-98937	NR_029475	78934	Mm.391688	NR_029475	ENSMUSG00000070315	4930581F22Rik	-	RIKEN cDNA 4930581F22 gene	ncRNA
upeaks-5413	chr10	115764167	115764394	+	0	NA	Intergenic	B1_Mus2|SINE|Alu	-53004	NM_146010	216350	Mm.22270	NM_146010	ENSMUSG00000034127	Tspan8	C76990|E330007O21Rik|Tm4sf3	tetraspanin 8	protein-coding
upeaks-8281	chr11	99230127	99231111	+	0	NA	5' UTR (NM_020618, exon 1 of 11)	5' UTR (NM_020618, exon 1 of 11)	398	NM_020618	57376	Mm.379086	NM_020618	ENSMUSG00000037935	Smarce1	2810417B20Rik|5830412H02Rik|9030408N19Rik|Baf27	SWI/SNF related, matrix associated, actin dependent regulator of chromatin, subfamily e, member 1	protein-coding
upeaks-8996	chr11	119146133	119146455	+	0	NA	3' UTR (NM_172443, exon 12 of 12)	3' UTR (NM_172443, exon 12 of 12)	7843	NR_105899	102465563		NR_105899	ENSMUSG00000098704	Mir6934	Gm27523|mmu-mir-6934	microRNA 6934	ncRNA
upeaks-40325	chr7	63868351	63868762	+	0	NA	Intergenic	Intergenic	-48301	NM_001256311	381994	Mm.425466	NM_001256311	ENSMUSG00000095061	E030018B13Rik	Gm1697	RIKEN cDNA E030018B13 gene	protein-coding
upeaks-25559	chr2	110043016	110043348	+	0	NA	intron (NM_026613, intron 5 of 5)	intron (NM_026613, intron 5 of 5)	7297	NR_040508	75517	Mm.363927	NR_040508	ENSMUSG00000086186	Ccdc34os	1700024P03Rik	coiled-coil domain containing 34, opposite strand	ncRNA
upeaks-46759	chr9	102714973	102715237	+	0	NA	Intergenic	Intergenic	-2699	NM_019764	56332	Mm.21145	NM_019764	ENSMUSG00000032531	Amotl2	AW549739|C79691|Lccp|MASCOT|mKIAA0989	angiomotin-like 2	protein-coding
upeaks-13896	chr14	36067024	36067278	+	0	NA	Intergenic	Lx2|LINE|L1	-27814	NM_175008	218921	Mm.212464	NM_175008	ENSMUSG00000096405	4930474N05Rik	-	RIKEN cDNA 4930474N05 gene	protein-coding
upeaks-12187	chr13	59220323	59220540	+	0	NA	Intergenic	Intergenic	324020	NM_001284221	67269	Mm.153008	NM_023328	ENSMUSG00000021557	Agtpbp1	1700020N17Rik|2310001G17Rik|2900054O13Rik|4930445M19Rik|5730402G09Rik|CCP1|Nna1|nmf243|pcd	ATP/GTP binding protein 1	protein-coding
upeaks-6545	chr11	39453516	39453980	+	0	NA	Intergenic	Intergenic	-63523	NR_126439	75315	Mm.461295	NR_126439		4930553C11Rik	-	RIKEN cDNA 4930553C11 gene	ncRNA
upeaks-1495	chr1	104949621	104950169	+	0	NA	intron (NM_011800, intron 6 of 11)	Lx|LINE|L1	181076	NM_011800	23836	Mm.103640	NM_011800	ENSMUSG00000050840	Cdh20	Cdh7	cadherin 20	protein-coding
upeaks-36939	chr6	37277209	37277645	+	0	NA	intron (NM_001347104, intron 1 of 32)	intron (NM_001347104, intron 1 of 32)	22549	NM_001081206	320127	Mm.119469	NM_001081206	ENSMUSG00000038665	Dgki	C130010K08Rik	diacylglycerol kinase, iota	protein-coding
upeaks-44868	chr9	8035493	8035867	+	0	NA	intron (NM_199017, intron 3 of 6)	intron (NM_199017, intron 3 of 6)	7143	NM_199017	234912	Mm.172430	NM_199017	ENSMUSG00000053070	9230110C19Rik	-	RIKEN cDNA 9230110C19 gene	protein-coding
upeaks-20625	chr17	87288283	87288489	+	0	NA	intron (NM_028639, intron 1 of 19)	intron (NM_028639, intron 1 of 19)	5500	NM_028639	225049	Mm.77396	NM_028639	ENSMUSG00000036918	Ttc7	1110035E02Rik|1700007L07Rik|Ttc7a|fsn|hea	tetratricopeptide repeat domain 7	protein-coding
upeaks-29469	chr3	121390016	121390215	+	0	NA	Intergenic	Intergenic	-36426	NM_028044	71994	Mm.275555	NM_028044	ENSMUSG00000053931	Cnn3	1600014M03Rik|C85854|Calpo3	calponin 3, acidic	protein-coding
upeaks-29945	chr3	142688572	142688774	+	0	NA	Intergenic	RLTR1B-int|LTR|ERV1	-12375	NM_001293560	229905	Mm.289643	NM_173763	ENSMUSG00000040213	Kyat3	Ccbl2|KATIII|Kat3	kynurenine aminotransferase 3	protein-coding
upeaks-34252	chr5	51899567	51900070	+	0	NA	Intergenic	Intergenic	236199	NR_105845	102466648		NR_105845	ENSMUSG00000098726	Mir6417	Gm27334|mmu-mir-6417	microRNA 6417	ncRNA
upeaks-26763	chr2	156903461	156903679	+	0	NA	Intergenic	Intergenic	-16492	NM_029983	77799	Mm.29264	NM_029983	ENSMUSG00000027636	Sla2	A930009E21Rik|AI430952|SLAP-2|SLAP2	Src-like-adaptor 2	protein-coding
upeaks-3541	chr10	17290265	17290479	+	0	NA	Intergenic	B1F|SINE|Alu	-194590	NR_038020	100504235	Mm.84044	NR_038020	ENSMUSG00000101969	Gm20125	-	predicted gene, 20125	ncRNA
upeaks-41585	chr7	123457050	123457399	+	0	NA	Intergenic	Intergenic	-5070	NM_001109045	11833	Mm.273175	NM_007474	ENSMUSG00000030762	Aqp8	AI255744|AQP-8	aquaporin 8	protein-coding
upeaks-21286	chr18	38703256	38703480	+	0	NA	Intergenic	Intergenic	-102100	NM_011898	24066	Mm.42038	NM_011898	ENSMUSG00000024427	Spry4	A030006O18Rik|sprouty4	sprouty homolog 4 (Drosophila)	protein-coding
upeaks-18787	chr17	5903729	5903982	+	0	NA	intron (NM_025664, intron 6 of 17)	intron (NM_025664, intron 6 of 17)	-37425	NM_001113352	20975	Mm.236068	NM_011523	ENSMUSG00000023805	Synj2	AI481647|SJ2|mKIAA0348	synaptojanin 2	protein-coding
upeaks-15005	chr14	115436580	115437029	+	0	NA	intron (NM_175500, intron 5 of 7)	intron (NM_175500, intron 5 of 7)	-27252	NR_045761	75088	Mm.444706	NR_045761	ENSMUSG00000093551	4930505G20Rik	-	RIKEN cDNA 4930505G20 gene	ncRNA
upeaks-11793	chr13	41753204	41753418	+	0	NA	Intergenic	Intergenic	94177	NM_175417	109254	Mm.25195	NM_175417	ENSMUSG00000058022	Adtrp	9530008L14Rik	androgen dependent TFPI regulating protein	protein-coding
upeaks-40380	chr7	65893552	65893836	+	0	NA	intron (NM_011048, intron 1 of 21)	intron (NM_011048, intron 1 of 21)	31558	NM_001291184	18553	Mm.294007	NM_011048	ENSMUSG00000030513	Pcsk6	C86343|Pace4|SPC4	proprotein convertase subtilisin/kexin type 6	protein-coding
upeaks-15881	chr15	60824754	60825184	+	0	NA	5' UTR (NM_001162926, exon 1 of 2)	5' UTR (NM_001162926, exon 1 of 2)	111	NM_001162926	399603	Mm.411968	NM_207269	ENSMUSG00000072568	Fam84b	BF642811|D330050I23Rik	family with sequence similarity 84, member B	protein-coding
upeaks-17191	chr16	7099689	7100337	+	0	NA	intron (NM_183188, intron 1 of 12)	intron (NM_183188, intron 1 of 12)	30178	NM_183188	268859	Mm.370334	NM_021477	ENSMUSG00000008658	Rbfox1	A2bp|A2bp1|Hrnbp1|fox-1	RNA binding protein, fox-1 homolog (C. elegans) 1	protein-coding
upeaks-10505	chr12	97403479	97403788	+	0	NA	Intergenic	Intergenic	855826	NM_008079	14420	Mm.5120	NM_008079	ENSMUSG00000021003	Galc	2310068B06Rik|A930008M05Rik|AW212969|AW413532|Gacy|twi|twitcher	galactosylceramidase	protein-coding
upeaks-37039	chr6	41636286	41636493	+	0	NA	promoter-TSS (NM_022413)	promoter-TSS (NM_022413)	16	NM_022413	64177	Mm.296889	NM_022413	ENSMUSG00000029868	Trpv6	CAT|CaT1|Cac|Ecac2|Otrpc3	transient receptor potential cation channel, subfamily V, member 6	protein-coding
upeaks-27833	chr3	32120080	32120426	+	0	NA	intron (NM_028231, intron 2 of 5)	intron (NM_028231, intron 2 of 5)	217550	NM_028231	72413	Mm.64790	NM_028231	ENSMUSG00000037610	Kcnmb2	2700049B16Rik|3110031N04Rik	potassium large conductance calcium-activated channel, subfamily M, beta member 2	protein-coding
upeaks-17862	chr16	38897398	38897732	+	0	NA	Intergenic	RMER15|LTR|ERVL	-4780	NM_170599	207683	Mm.245564	NM_170599	ENSMUSG00000022790	Igsf11	1700025L02Rik|BT-IgSF|Igsf13	immunoglobulin superfamily, member 11	protein-coding
upeaks-7981	chr11	93500563	93500798	+	0	NA	intron (NM_028296, intron 4 of 8)	intron (NM_028296, intron 4 of 8)	385086	NM_001013375	217109	Mm.379350	NM_001013375	ENSMUSG00000054079	Utp18	6230425C22Rik|6430513M13|Wdr50	UTP18 small subunit processome component	protein-coding
upeaks-34461	chr5	67815574	67816151	+	0	NA	intron (NM_001284345, intron 1 of 36)	intron (NM_001284345, intron 1 of 36)	31569	NM_009727	11980	Mm.153230	NM_009727	ENSMUSG00000037685	Atp8a1	AI481521|AI853962|APLT|AW743152|AW822227|Atp3a2|B230107D19Rik|ClassI	ATPase, aminophospholipid transporter (APLT), class I, type 8A, member 1	protein-coding
upeaks-15845	chr15	59066163	59066498	+	0	NA	intron (NM_001146180, intron 1 of 13)	intron (NM_001146180, intron 1 of 13)	15696	NM_144800	211401	Mm.215481	NM_144800	ENSMUSG00000022353	Mtss1	2310003N14Rik|BC024131|D130001D01Rik|Mim|mKIAA0429	metastasis suppressor 1	protein-coding
upeaks-46123	chr9	67903579	67903821	+	0	NA	intron (NM_177184, intron 27 of 84)	intron (NM_177184, intron 27 of 84)	63304	NM_177184	320528	Mm.241454	NM_177184	ENSMUSG00000035284	Vps13c	AI552542|AV026040|C230055H22Rik|W51662|chorein	vacuolar protein sorting 13C	protein-coding
upeaks-39215	chr7	3217675	3217918	+	0	NA	promoter-TSS (NR_029640)	promoter-TSS (NR_029640)	-830	NR_029640	100049710		NR_029640	ENSMUSG00000077815	Mir290a	Mir290|Mirn290|mir-290a|mmu-miR-290|mmu-mir-290a	microRNA 290a	ncRNA
upeaks-17811	chr16	37011585	37012263	+	0	NA	exon (NM_001159369, exon 1 of 25)	exon (NM_001159369, exon 1 of 25)	138	NM_029977	77782	Mm.259114	NM_029977	ENSMUSG00000034206	Polq	A430110D14Rik	polymerase (DNA directed), theta	protein-coding
upeaks-12263	chr13	63569336	63569543	+	0	NA	intron (NM_001328514, intron 1 of 23)	intron (NM_001328514, intron 1 of 23)	-3704	NM_008957	19206	Mm.228798	NM_008957	ENSMUSG00000021466	Ptch1	A230106A15Rik|Ptc|Ptc1|Ptch|mes	patched 1	protein-coding
upeaks-26324	chr2	141091286	141091985	+	0	NA	intron (NM_001013802, intron 5 of 18)	intron (NM_001013802, intron 5 of 18)	-420159	NM_001172160	71436	Mm.426781	NM_178382	ENSMUSG00000051379	Flrt3	5530600M07Rik|C430047I10Rik|mKIAA1469	fibronectin leucine rich transmembrane protein 3	protein-coding
upeaks-44947	chr9	14684298	14684532	+	0	NA	Intergenic	B4A|SINE|B4	56318	NM_177905	330890	Mm.334969	NM_177905	ENSMUSG00000036912	Piwil4	9230101H05Rik|Miwi2	piwi-like RNA-mediated gene silencing 4	protein-coding
upeaks-36443	chr6	4189816	4190020	+	0	NA	Intergenic	Intergenic	-102991	NM_009748	12068	Mm.286457	NM_009748	ENSMUSG00000032757	Bet1	AW555236|Bet-1	Bet1 golgi vesicular membrane trafficking protein	protein-coding
upeaks-9156	chr12	4417632	4418030	+	0	NA	intron (NM_010881, intron 1 of 22)	L1MA6|LINE|L1	59351	NM_010881	17977	Mm.301039	NM_010881	ENSMUSG00000020647	Ncoa1	KAT13A|NCoA-1|NRC-1|SRC-1|SRC-a|SRC1|bHLHe74|mNRC-1	nuclear receptor coactivator 1	protein-coding
upeaks-17751	chr16	34352654	34353107	+	0	NA	intron (NM_001164268, intron 5 of 33)	intron (NM_001164268, intron 5 of 33)	161147	NM_001164268	545156	Mm.82274	NM_177357	ENSMUSG00000061751	Kalrn	2210407G14Rik|AV235988|DUET|E530005C20Rik|Gm539|Hapip|TRAD	kalirin, RhoGEF kinase	protein-coding
upeaks-20365	chr17	75603607	75603866	+	0	NA	Intergenic	Intergenic	-51790	NM_133747	72722	Mm.24641	NM_133747	ENSMUSG00000002017	Fam98a	2810405J04Rik|AL024114	family with sequence similarity 98, member A	protein-coding
upeaks-25524	chr2	107231807	107232016	+	0	NA	Intergenic	RMER1A|Other|Other	-58678	NM_021275	16492	Mm.142718	NM_021275	ENSMUSG00000042604	Kcna4	Kv1.4	potassium voltage-gated channel, shaker-related subfamily, member 4	protein-coding
upeaks-11183	chr13	11211556	11211895	+	0	NA	Intergenic	MTE2b|LTR|ERVL-MaLR	-310327	NR_027813	664793	Mm.410565	NR_027813		Zp4-ps	EG664793|Zp4|Zpb	zona pellucida glycoprotein 4, pseudogene	pseudo
upeaks-7121	chr11	63898124	63898323	+	0	NA	intron (NM_018805, intron 1 of 1)	intron (NM_018805, intron 1 of 1)	24061	NM_018805	54710	Mm.274426	NM_018805	ENSMUSG00000070407	Hs3st3b1	3-OST-3B|3OST3B1|3Ost3b|AU041882|AW536289|Hs3st3b|m3-OST-3B	heparan sulfate (glucosamine) 3-O-sulfotransferase 3B1	protein-coding
upeaks-12664	chr13	89767426	89767775	+	0	NA	Intergenic	L1_Mus4|LINE|L1	-25088	NM_001134475	13003	Mm.158700	NM_019389	ENSMUSG00000021614	Vcan	5430420N07Rik|9430051N09|Cspg2|DPEAAE|NG2|PG-M|PG-M(V0)|PG-M(V1)|hdf	versican	protein-coding
upeaks-31432	chr4	83700129	83700395	+	0	NA	intron (NM_001081012, intron 21 of 25)	RMER15|LTR|ERVL	174717	NM_001081012	320226	Mm.180032	NM_029117	ENSMUSG00000052407	Ccdc171	4930418J05Rik|4930473A06Rik|A330015D16Rik	coiled-coil domain containing 171	protein-coding
upeaks-17112	chr16	3122845	3123156	+	0	NA	Intergenic	Intergenic	-469398	NM_146860	258859	Mm.377723	NM_146860	ENSMUSG00000051003	Olfr161	MOR131-1|OR912-47M6	olfactory receptor 161	protein-coding
upeaks-25518	chr2	106895670	106895996	+	0	NA	Intergenic	Intergenic	74558	NM_173750	212772	Mm.381231	NM_173750	ENSMUSG00000027122	Arl14ep	2700007P21Rik|4930448O08Rik|ARF7EP	ADP-ribosylation factor-like 14 effector protein	protein-coding
upeaks-13522	chr14	20664489	20664754	+	0	NA	promoter-TSS (NM_001310432)	promoter-TSS (NM_001310432)	-47	NM_001310432	68760	Mm.35789	NM_175132	ENSMUSG00000039376	Synpo2l	1110054M18Rik|Chap	synaptopodin 2-like	protein-coding
upeaks-40591	chr7	78597377	78597643	+	0	NA	intron (NR_015542, intron 8 of 10)	intron (NR_015542, intron 8 of 10)	-19672	NM_182809	18213	Mm.33496	NM_008746	ENSMUSG00000059146	Ntrk3	AW125844|Ntrk3_tv3|TrkC	neurotrophic tyrosine kinase, receptor, type 3	protein-coding
upeaks-6206	chr11	20603430	20603748	+	0	NA	intron (NM_021372, intron 1 of 1)	intron (NM_021372, intron 1 of 1)	-28388	NM_001038625	58172	Mm.339676	NM_021372	ENSMUSG00000049800	Sertad2	AB041541|AU021878|Kiaa0127|MNCb-1504|SEI-2|Sei2|TRIP-Br2|mKIAA0127	SERTA domain containing 2	protein-coding
upeaks-35201	chr5	112896158	112896687	+	0	NA	promoter-TSS (NM_028901)	promoter-TSS (NM_028901)	-60	NM_028901	74376	Mm.441903	NM_028901	ENSMUSG00000072720	Myo18b	4932408L24Rik|4933411E19Rik|Gm448	myosin XVIIIb	protein-coding
upeaks-14586	chr14	74846733	74847016	+	0	NA	intron (NM_001252132, intron 2 of 18)	intron (NM_001252132, intron 2 of 18)	101003	NM_001033439	380916	Mm.288868	NM_001033439	ENSMUSG00000068015	Lrch1	4832412D13Rik|AI552548|AW215503|Chdc1|mKIAA1016	leucine-rich repeats and calponin homology (CH) domain containing 1	protein-coding
upeaks-40484	chr7	70796171	70796811	+	0	NA	Intergenic	Intergenic	-429745	NM_183261	11819	Mm.158143	NM_009697	ENSMUSG00000030551	Nr2f2	2700033K02Rik|9430015G03Rik|ARP-1|Aporp1|COUP-TF2|COUP-TFII|COUPTFB|EAR3|SVP40|Tcfcoup2	nuclear receptor subfamily 2, group F, member 2	protein-coding
upeaks-38326	chr6	115650866	115651118	+	0	NA	intron (NM_029780, intron 1 of 16)	B3|SINE|B2	25643	NM_029780	110157	Mm.184163	NM_029780	ENSMUSG00000000441	Raf1	6430402F14Rik|AA990557|BB129353|Craf1|D830050J10Rik|Raf-1|c-Raf|v-Raf	v-raf-leukemia viral oncogene 1	protein-coding
upeaks-42408	chr8	13243375	13243901	+	0	NA	intron (NM_172750, intron 4 of 6)	intron (NM_172750, intron 4 of 6)	10524	NM_172750	234072	Mm.132785	NM_172750	ENSMUSG00000031448	Adprhl1	Arh2|D330008N11Rik	ADP-ribosylhydrolase like 1	protein-coding
upeaks-24779	chr2	65995098	65995411	+	0	NA	intron (NM_001290666, intron 3 of 4)	intron (NM_001290666, intron 3 of 4)	63389	NM_001290665	77771	Mm.102025	NM_153409	ENSMUSG00000044647	Csrnp3	A330102K23Rik|CSRNP-3|Csnrp3|Mbu1|taip-2	cysteine-serine-rich nuclear protein 3	protein-coding
upeaks-30532	chr4	14777529	14777728	+	0	NA	intron (NM_028499, intron 1 of 7)	L1_Rod|LINE|L1	18424	NM_028499	73314	Mm.52613	NM_028499	ENSMUSG00000023151	Lrrc69	1700034K16Rik	leucine rich repeat containing 69	protein-coding
upeaks-3126	chr1	188180495	188180729	+	0	NA	intron (NM_011935, intron 5 of 6)	intron (NM_011935, intron 5 of 6)	-82226	NM_021408	22283	Mm.331238	NM_021408	ENSMUSG00000026609	Ush2a	A930011D15Rik|A930037M10Rik|Gm676|Gm983|Mush2a|Usherin|Ushrn	Usher syndrome 2A	protein-coding
upeaks-21016	chr18	24071150	24071481	+	0	NA	Intergenic	RLTR1D|LTR|ERV1	50504	NM_172625	225280	Mm.258973	NM_172625	ENSMUSG00000047989	Ino80c	D030070L09Rik	INO80 complex subunit C	protein-coding
upeaks-36479	chr6	5385297	5385496	+	0	NA	intron (NM_023048, intron 1 of 5)	MLT1G3|LTR|ERVL-MaLR	2010	NM_023048	65255	Mm.51340	NM_023048	ENSMUSG00000042607	Asb4	8430401O13Rik|AV117194|AW060255	ankyrin repeat and SOCS box-containing 4	protein-coding
upeaks-34289	chr5	53295776	53296100	+	0	NA	Intergenic	MLTR18D_MM|LTR|ERVK	28832	NM_001145433	66278	Mm.27900	NM_001145433	ENSMUSG00000061461	Smim20	1110067B18Rik|1810013D10Rik|N28078	small integral membrane protein 20	protein-coding
upeaks-47594	chrX	41692149	41692421	+	0	NA	Intergenic	Intergenic	219616	NM_001033422	331401	Mm.259498	NM_001033422	ENSMUSG00000037475	Thoc2	6330441O12Rik|D130005M13Rik|Gm1139|Gm1793|Tho2	THO complex 2	protein-coding
upeaks-9589	chr12	34103552	34103775	+	0	NA	intron (NM_001271386, intron 25 of 27)	intron (NM_001271386, intron 25 of 27)	145992	NM_011658	22160	Mm.3280	NM_011658	ENSMUSG00000035799	Twist1	M-Twist|Pde|Ska10|Ska<m10Jus>|Twist|bHLHa38|pdt	twist basic helix-loop-helix transcription factor 1	protein-coding
upeaks-4056	chr10	50203599	50203889	+	0	NA	Intergenic	Intergenic	-388925	NM_198007	77987	Mm.222497	NM_198007	ENSMUSG00000038774	Ascc3	ASC1p200|B630009I04Rik|BC023451|D430001L07Rik|D630041L21|Helic1|RNAH	activating signal cointegrator 1 complex subunit 3	protein-coding
upeaks-12983	chr13	106913085	106913408	+	0	NA	intron (NM_029665, intron 3 of 29)	RLTR1D|LTR|ERV1	23669	NM_029665	76582	Mm.132208	NM_029665	ENSMUSG00000042590	Ipo11	1700081H05Rik|2510001A17Rik|AI314624|AW555235|E330021B14Rik|Ranbp11	importin 11	protein-coding
upeaks-2394	chr1	160520819	160521075	+	0	NA	intron (NM_013862, intron 13 of 20)	intron (NM_013862, intron 13 of 20)	56806	NM_001146330	620246	Mm.478780	NM_001146330		Gpr52	EG620246	G protein-coupled receptor 52	protein-coding
upeaks-26145	chr2	133274437	133274715	+	0	NA	Intergenic	Intergenic	-277583	NM_007553	12156	Mm.103205	NM_007553	ENSMUSG00000027358	Bmp2	AI467020|Bmp2a	bone morphogenetic protein 2	protein-coding
upeaks-20273	chr17	71698242	71698877	+	0	NA	intron (NM_177087, intron 8 of 19)	intron (NM_177087, intron 8 of 19)	25298	NM_177087	320159	Mm.187372	NM_177087	ENSMUSG00000045761	Fam179a	4632412N22Rik	family with sequence similarity 179, member A	protein-coding
upeaks-5510	chr10	119086523	119086960	+	0	NA	Intergenic	Intergenic	-6164	NR_045348	73400	Mm.416864	NR_045348	ENSMUSG00000100681	1700064J06Rik	-	RIKEN cDNA 1700064J06 gene	ncRNA
upeaks-35531	chr5	122520802	122521403	+	0	NA	Intergenic	Intergenic	-18877	NM_001110140	11938	Mm.227583	NM_009722	ENSMUSG00000029467	Atp2a2	9530097L16Rik|D5Wsu150e|SERCA2|SERCA2B|Serca2a|mKIAA4195	ATPase, Ca++ transporting, cardiac muscle, slow twitch 2	protein-coding
upeaks-37762	chr6	87756401	87756630	+	0	NA	TTS (NM_001159697)	TTS (NM_001159697)	-21621	NM_018762	54368	Mm.12897	NM_018762	ENSMUSG00000030054	Gp9	Cd42|GPIX	glycoprotein 9 (platelet)	protein-coding
upeaks-22228	chr18	89004572	89004791	+	0	NA	intron (NM_175542, intron 11 of 48)	RLTR22_Mur|LTR|ERVK	32651	NR_105777	102466633		NR_105777	ENSMUSG00000098676	Mir6359	Gm27328|mmu-mir-6359	microRNA 6359	ncRNA
upeaks-21358	chr18	44649917	44650240	+	0	NA	intron (NM_001085373, intron 3 of 18)	intron (NM_001085373, intron 3 of 18)	-11587	NR_026853	626275	Mm.427116	NR_026853	ENSMUSG00000097610	A930012L18Rik	-	RIKEN cDNA A930012L18 gene	ncRNA
upeaks-2588	chr1	167862702	167863136	+	0	NA	Intergenic	Intergenic	173361	NM_033652	110648	Mm.330081	NM_033652	ENSMUSG00000026686	Lmx1a	Lmx1.1|dr|dreher|sst	LIM homeobox transcription factor 1 alpha	protein-coding
upeaks-27681	chr3	19566930	19567383	+	0	NA	intron (NM_025489, intron 2 of 4)	intron (NM_025489, intron 2 of 4)	35909	NM_001163537	66326	Mm.45615	NM_025489	ENSMUSG00000027606	Dnajc5b	1700008A05Rik	DnaJ heat shock protein family (Hsp40) member C5 beta	protein-coding
upeaks-36025	chr5	138715625	138715824	+	0	NA	Intergenic	Intergenic	-39357	NM_030565	80752	Mm.320355	NM_030565	ENSMUSG00000025854	Fam20c	C76981|DMP-4|DMP4|GEF-CK|mKIAA4081	family with sequence similarity 20, member C	protein-coding
upeaks-40509	chr7	73069229	73069800	+	0	NA	Intergenic	Intergenic	32554	NR_046024	625243	Mm.261798	NR_046024	ENSMUSG00000108383	Gm6567	-	predicted gene 6567	ncRNA
upeaks-46262	chr9	75916093	75916342	+	0	NA	Intergenic	RSINE1|SINE|B4	-98760	NM_173731	208982	Mm.82306	NM_173731	ENSMUSG00000007908	Hmgcll1	BC037381	3-hydroxymethyl-3-methylglutaryl-Coenzyme A lyase-like 1	protein-coding
upeaks-40255	chr7	51982251	51982753	+	0	NA	intron (NM_008087, intron 7 of 7)	intron (NM_008087, intron 7 of 7)	23212	NR_027704	75744	Mm.386823	NM_001160345	ENSMUSG00000074093	Svip	1700006C13Rik|6620401M08Rik	small VCP/p97-interacting protein	protein-coding
upeaks-14362	chr14	63372622	63372821	+	0	NA	TTS (NM_007549)	TTS (NM_007549)	44466	NM_007549	12143	Mm.3962	NM_007549	ENSMUSG00000014453	Blk	-	B lymphoid kinase	protein-coding
upeaks-43647	chr8	84799712	84799943	+	0	NA	intron (NM_001081982, intron 1 of 9)	(CCGCG)n|Simple_repeat|Simple_repeat	511	NM_001081982	18032	Mm.9394	NM_010906	ENSMUSG00000001911	Nfix	CTF|NF-I/X|NF1-X|NFI-X	nuclear factor I/X	protein-coding
upeaks-35140	chr5	111097376	111097601	+	0	NA	intron (NM_001267622, intron 3 of 22)	PB1|SINE|Alu	93344	NR_030482	735278		NR_030482	ENSMUSG00000076163	Mir701	Mirn701|mir-701|mmu-mir-701	microRNA 701	ncRNA
upeaks-20951	chr18	16715441	16715839	+	0	NA	intron (NM_007664, intron 2 of 15)	intron (NM_007664, intron 2 of 15)	93606	NM_007664	12558	Mm.257437	NM_007664	ENSMUSG00000024304	Cdh2	CDHN|N-CAD|Ncad	cadherin 2	protein-coding
upeaks-30292	chr3	157115043	157115745	+	0	NA	intron (NM_177274, intron 4 of 6)	intron (NM_177274, intron 4 of 6)	-419003	NM_017381	53861	Mm.259036	NM_017381	ENSMUSG00000028180	Zranb2	AI227013|Zfp265|Zis|Znf265	zinc finger, RAN-binding domain containing 2	protein-coding
upeaks-42870	chr8	41015187	41015388	+	0	NA	intron (NM_001005863, intron 7 of 13)	intron (NM_001005863, intron 7 of 13)	-2181	NR_015457	78849	Mm.440930	NR_015457	ENSMUSG00000084960	B430010I23Rik	-	RIKEN cDNA B430010I23 gene	ncRNA
upeaks-15260	chr15	7531317	7531579	+	0	NA	Intergenic	Intergenic	-133053	NM_001289498	268780	Mm.203208	NM_178748	ENSMUSG00000042961	Egflam	5930412K08|AU040377	EGF-like, fibronectin type III and laminin G domains	protein-coding
upeaks-12892	chr13	100516631	100517109	+	0	NA	intron (NM_008756, intron 4 of 8)	intron (NM_008756, intron 4 of 8)	-24261	NM_022011	23894	Mm.272533	NM_022011	ENSMUSG00000021639	Gtf2h2	44kDa|BTF2 p44|BTF2-p44|Btf2p44|p44	general transcription factor II H, polypeptide 2	protein-coding
upeaks-36930	chr6	36903854	36904124	+	0	NA	intron (NM_001347104, intron 27 of 32)	intron (NM_001347104, intron 27 of 32)	-92628	NM_008973	19242	Mm.279690	NM_008973	ENSMUSG00000029838	Ptn	HARP|HB-GAM|HBBN|HBGF-8|HBNF|OSF|Osf-1|Osf1	pleiotrophin	protein-coding
upeaks-1703	chr1	125709633	125710171	+	0	NA	intron (NM_027677, intron 1 of 1)	intron (NM_027677, intron 1 of 1)	32906	NM_027677	71111	Mm.32727	NM_027677	ENSMUSG00000026343	Gpr39	4933415E13Rik	G protein-coupled receptor 39	protein-coding
upeaks-11528	chr13	28586148	28586384	+	0	NA	intron (NR_045053, intron 6 of 8)	intron (NR_045053, intron 6 of 8)	124607	NR_105787	102466635		NR_105787	ENSMUSG00000099158	Mir6368	Gm27800|mmu-mir-6368	microRNA 6368	ncRNA
upeaks-42103	chr7	142499218	142499628	+	0	NA	intron (NM_001347548, intron 1 of 14)	intron (NM_001347548, intron 1 of 14)	587	NM_001347547	21957	Mm.389992	NM_011620	ENSMUSG00000061723	Tnnt3	fTnT	troponin T3, skeletal, fast	protein-coding
upeaks-1439	chr1	95582308	95582596	+	0	NA	Intergenic	Intergenic	85142	NM_001159745	20452	Mm.306228	NM_009183	ENSMUSG00000040710	St8sia4	PST|PST-1|SIAT8-D|ST8SiaIV|Siat8d	ST8 alpha-N-acetyl-neuraminide alpha-2,8-sialyltransferase 4	protein-coding
upeaks-10432	chr12	89482220	89482471	+	0	NA	intron (NM_172544, intron 8 of 19)	intron (NM_172544, intron 8 of 19)	-330138	NM_001252074	18191	Mm.425766	NM_172544	ENSMUSG00000066392	Nrxn3	-	neurexin III	protein-coding
upeaks-3320	chr1	195100666	195101159	+	0	NA	Intergenic	RLTR30D2_MM|LTR|ERV1	-8664	NM_010778	17221	Mm.12884	NM_010778	ENSMUSG00000016493	Cd46	Mcp	CD46 antigen, complement regulatory protein	protein-coding
upeaks-47823	chrX	85576352	85576572	+	0	NA	intron (NM_025729, intron 2 of 8)	intron (NM_025729, intron 2 of 8)	2440	NM_025729	66724	Mm.119646	NM_025729	ENSMUSG00000035476	Tab3	4921526G09Rik|Map3k7ip3|mKIAA4135	TGF-beta activated kinase 1/MAP3K7 binding protein 3	protein-coding
upeaks-24755	chr2	65045070	65045269	+	0	NA	Intergenic	Intergenic	-22403	NM_016719	50915	Mm.214554	NM_016719	ENSMUSG00000026888	Grb14	AI505286	growth factor receptor bound protein 14	protein-coding
upeaks-7668	chr11	80967688	80967892	+	0	NA	intron (NM_001034013, intron 2 of 9)	intron (NM_001034013, intron 2 of 9)	109401	NM_029367	75622	Mm.26988	NM_029367	ENSMUSG00000053184	Spaca3	1700025M08Rik|ALLP17|Lyc3|SLLP1|mSLLP1	sperm acrosome associated 3	protein-coding
upeaks-38526	chr6	121848497	121848747	+	0	NA	intron (NM_008645, intron 4 of 35)	intron (NM_008645, intron 4 of 35)	10081	NM_008645	17836	Mm.1311	NM_008645	ENSMUSG00000059908	Mug1	-	murinoglobulin 1	protein-coding
upeaks-21505	chr18	55107130	55107402	+	0	NA	Intergenic	Intergenic	-117086	NM_175751	269023	Mm.192984	NM_175751	ENSMUSG00000052713	Zfp608	4932417D18Rik|D430007A19Rik|Znf608	zinc finger protein 608	protein-coding
upeaks-33543	chr5	5354072	5354337	+	0	NA	intron (NM_011074, intron 2 of 14)	intron (NM_011074, intron 2 of 14)	26047	NM_011074	18647	Mm.389061	NM_011074	ENSMUSG00000028926	Cdk14	Pftk1|mKIAA0834	cyclin-dependent kinase 14	protein-coding
upeaks-2717	chr1	172242347	172242622	+	0	NA	intron (NM_013734, intron 11 of 22)	intron (NM_013734, intron 11 of 22)	15940	NM_013734	27222	Mm.482392	NM_013734	ENSMUSG00000007107	Atp1a4	-	ATPase, Na+/K+ transporting, alpha 4 polypeptide	protein-coding
upeaks-47815	chrX	83524793	83525053	+	0	NA	intron (NM_007868, intron 7 of 78)	RLTR13A1|LTR|ERVK	-36999	NM_021898	100502723	Mm.383210	NM_021898	ENSMUSG00000035522	Tsga8	Halap-X|Halapx	testis specific gene A8	protein-coding
upeaks-209	chr1	20563044	20563250	+	0	NA	intron (NM_153179, intron 18 of 66)	PB1D11|SINE|Alu	54910	NM_153179	241035	Mm.249253	NM_153179	ENSMUSG00000043760	Pkhd1	AI118496|AI182499|FPC|Tigm1	polycystic kidney and hepatic disease 1	protein-coding
upeaks-18893	chr17	12780084	12780485	+	0	NA	intron (NR_027784, intron 2 of 2)	RMER20C_Mm|LTR|ERVK	-10578	NM_010515	16004	Mm.26553	NM_010515	ENSMUSG00000023830	Igf2r	AI661837|CD222|CI-MPR|M6P/IGF2R|Mpr300	insulin-like growth factor 2 receptor	protein-coding
upeaks-30770	chr4	39067483	39067833	+	0	NA	Intergenic	Lx5c|LINE|L1	-382635	NM_001081095	75471	Mm.23522	NM_001081095	ENSMUSG00000028287	1700009N14Rik	AI429145	RIKEN cDNA 1700009N14 gene	protein-coding
upeaks-32188	chr4	120047237	120047444	+	0	NA	intron (NM_010657, intron 2 of 8)	intron (NM_010657, intron 2 of 8)	-113866	NM_007902	13615	Mm.284855	NM_007902	ENSMUSG00000028635	Edn2	ET-2|PPET2|VIC	endothelin 2	protein-coding
upeaks-12842	chr13	98366297	98366554	+	0	NA	Intergenic	CpG	12180	NM_008242	15229	Mm.347441	NM_008242	ENSMUSG00000078302	Foxd1	AI385632|BF-2|FREAC4|Hfh10|Hfhbf2	forkhead box D1	protein-coding
upeaks-30188	chr3	152797361	152797723	+	0	NA	Intergenic	Intergenic	83442	NM_178016	329777	Mm.331447	NM_025662	ENSMUSG00000039047	Pigk	3000001O05Rik	phosphatidylinositol glycan anchor biosynthesis, class K	protein-coding
upeaks-4058	chr10	50565562	50565764	+	0	NA	Intergenic	PB1D11|SINE|Alu	-27006	NM_198007	77987	Mm.222497	NM_198007	ENSMUSG00000038774	Ascc3	ASC1p200|B630009I04Rik|BC023451|D430001L07Rik|D630041L21|Helic1|RNAH	activating signal cointegrator 1 complex subunit 3	protein-coding
upeaks-36468	chr6	4938899	4939136	+	0	NA	intron (NM_181595, intron 2 of 15)	intron (NM_181595, intron 2 of 15)	35697	NM_181595	243725	Mm.332901	NM_181595	ENSMUSG00000032827	Ppp1r9a	2810430P21Rik|4930518N04Rik|5330407E15|A230094E16Rik|BB181831|NRB|mKIAA1222|neurabin-I	protein phosphatase 1, regulatory (inhibitor) subunit 9A	protein-coding
upeaks-39128	chr6	146530728	146531140	+	0	NA	Intergenic	Intergenic	-28711	NM_019923	16439	Mm.7800	NM_010586	ENSMUSG00000030287	Itpr2	AI649341|InsP3R-2|InsP3R-5|Ip3r2|Itpr5|insP3R2	inositol 1,4,5-triphosphate receptor 2	protein-coding
upeaks-27947	chr3	39295298	39295570	+	0	NA	Intergenic	Intergenic	408494	NM_183221	329628	Mm.316210	NM_183221	ENSMUSG00000046743	Fat4	6030410K14Rik|9430004M15	FAT atypical cadherin 4	protein-coding
upeaks-16607	chr15	89020095	89020459	+	0	NA	exon (NM_031260, exon 17 of 27)	exon (NM_031260, exon 17 of 27)	37283	NM_031260	83456	Mm.358791	NM_031260	ENSMUSG00000015365	Mov10l1	CHAMP|Csm	Moloney leukemia virus 10-like 1	protein-coding
upeaks-18996	chr17	17762892	17763195	+	0	NA	Intergenic	(CAAAA)n|Simple_repeat|Simple_repeat	59102	NM_001104539	626942	Mm.404019	NM_001104539	ENSMUSG00000092120	Vmn2r90	EG626942	vomeronasal 2, receptor 90	protein-coding
upeaks-11675	chr13	34746570	34746815	+	0	NA	exon (NM_138746, exon 2 of 2)	exon (NM_138746, exon 2 of 2)	7050	NM_138746	108161	Mm.41991	NM_138746	ENSMUSG00000038246	Fam50b	D0H6S2654E|X5L|XAP-5-like	family with sequence similarity 50, member B	protein-coding
upeaks-1059	chr1	78726925	78727126	+	0	NA	Intergenic	Intergenic	68585	NM_001136226	195434	Mm.276016	NM_001001981	ENSMUSG00000079470	Utp14b	4932411L21Rik|jsd	UTP14B small subunit processome component	protein-coding
upeaks-15083	chr14	120318435	120318639	+	0	NA	intron (NM_175341, intron 1 of 8)	intron (NM_175341, intron 1 of 8)	42868	NM_175341	105559	Mm.238266	NM_175341	ENSMUSG00000022139	Mbnl2	1110002M11Rik|AI047808|AI837313|AI849185|AL118326|MBLL|R75232|mKIAA4072	muscleblind-like 2	protein-coding
upeaks-7896	chr11	88576566	88576765	+	0	NA	intron (NM_054043, intron 6 of 13)	intron (NM_054043, intron 6 of 13)	-42586	NR_131025	68397	Mm.426889	NR_131025		0610039H22Rik	-	RIKEN cDNA 0610039H22 gene	ncRNA
upeaks-34462	chr5	67822526	67823075	+	0	NA	intron (NM_001284345, intron 1 of 36)	intron (NM_001284345, intron 1 of 36)	24631	NM_009727	11980	Mm.153230	NM_009727	ENSMUSG00000037685	Atp8a1	AI481521|AI853962|APLT|AW743152|AW822227|Atp3a2|B230107D19Rik|ClassI	ATPase, aminophospholipid transporter (APLT), class I, type 8A, member 1	protein-coding
upeaks-1547	chr1	108181483	108181682	+	0	NA	Intergenic	Intergenic	264323	NR_102307	319596	Mm.136054	NR_102306	ENSMUSG00000100457	D830032E09Rik	-	RIKEN cDNA D830032E09 gene	ncRNA
upeaks-16790	chr15	96969957	96970526	+	0	NA	Intergenic	MLTR18D_MM|LTR|ERVK	85715	NM_027052	69354	Mm.250980	NM_027052	ENSMUSG00000022464	Slc38a4	1110012E16Rik|1700012A18Rik|Ata3|mATA3|mNAT3	solute carrier family 38, member 4	protein-coding
upeaks-36860	chr6	33769358	33769624	+	0	NA	intron (NM_009148, intron 11 of 17)	intron (NM_009148, intron 11 of 17)	-259957	NM_028886	74354	Mm.127952	NM_028886	ENSMUSG00000056215	Lrguk	4921528H16Rik	leucine-rich repeats and guanylate kinase domain containing	protein-coding
upeaks-34940	chr5	102751620	102752009	+	0	NA	intron (NM_146161, intron 2 of 8)	intron (NM_146161, intron 2 of 8)	-16996	NM_001286468	231532	Mm.440191	NM_029270	ENSMUSG00000057315	Arhgap24	0610025G21Rik	Rho GTPase activating protein 24	protein-coding
upeaks-23303	chr19	53502400	53502599	+	0	NA	Intergenic	PB1|SINE|Alu	-26819	NM_001085390	240672	Mm.482424	NM_001085390	ENSMUSG00000034765	Dusp5	Gm337	dual specificity phosphatase 5	protein-coding
upeaks-14561	chr14	73041093	73041409	+	0	NA	intron (NM_001162412, intron 2 of 4)	intron (NM_001162412, intron 2 of 4)	7863	NM_001162412	70086	Mm.158324	NM_133720	ENSMUSG00000033470	Cysltr2	2300001H05Rik|CYSLT2R|Cltr2|Cyslt2	cysteinyl leukotriene receptor 2	protein-coding
upeaks-5832	chr10	129821853	129822487	+	0	NA	Intergenic	RLTR13A1|LTR|ERVK	-19647	NM_146552	258545	Mm.377561	NM_146552	ENSMUSG00000063173	Olfr811	MOR110-6	olfactory receptor 811	protein-coding
upeaks-16730	chr15	94104805	94105247	+	0	NA	Intergenic	L2|LINE|L2	-142176	NR_045629	328594	Mm.135523	NR_045629		D630010B17Rik	Gm811	RIKEN cDNA D630010B17 gene	ncRNA
upeaks-32228	chr4	121021889	121022334	+	0	NA	Intergenic	Intergenic	-4864	NM_133716	69780	Mm.271819	NM_133716	ENSMUSG00000032870	Smap2	1810031K02Rik|AA408614|Smap1l	small ArfGAP 2	protein-coding
upeaks-45917	chr9	62407696	62408024	+	0	NA	Intergenic	Intergenic	66517	NM_009672	11737	Mm.269088	NM_009672	ENSMUSG00000032249	Anp32a	Anp32|I1PP2A|LANP|PHAP1|W91701|pp32	acidic (leucine-rich) nuclear phosphoprotein 32 family, member A	protein-coding
upeaks-30276	chr3	156477684	156477883	+	0	NA	Intergenic	RLTR26_Mus|LTR|ERVK	83904	NR_040399	329782	Mm.183459	NR_040398	ENSMUSG00000085084	4930570G19Rik	C630015G22	RIKEN cDNA 4930570G19 gene	ncRNA
upeaks-43923	chr8	95226945	95227368	+	0	NA	Intergenic	MLTR14|LTR|ERV1	79429	NM_145601	333329	Mm.484049	NM_145601	ENSMUSG00000031789	Cngb1	Cngb1b|Garp2|Gm1959	cyclic nucleotide gated channel beta 1	protein-coding
upeaks-20704	chr17	91439896	91440223	+	0	NA	Intergenic	Lx7|LINE|L1	-347257	NM_020252	18189	Mm.478418	NM_020252	ENSMUSG00000024109	Nrxn1	1700062G21Rik|9330127H16Rik|A230068P09Rik|mKIAA0578	neurexin I	protein-coding
upeaks-43324	chr8	71312766	71313147	+	0	NA	intron (NM_015742, intron 2 of 39)	intron (NM_015742, intron 2 of 39)	40242	NM_001142322	17925	Mm.33779	NM_015742	ENSMUSG00000004677	Myo9b	-	myosin IXb	protein-coding
upeaks-9843	chr12	57542373	57542572	+	0	NA	exon (NM_008259, exon 2 of 2)	exon (NM_008259, exon 2 of 2)	3649	NM_008259	15375	Mm.4578	NM_008259	ENSMUSG00000035451	Foxa1	Hnf-3a|Hnf3a|Tcf-3a|Tcf3a	forkhead box A1	protein-coding
upeaks-40257	chr7	52254609	52254832	+	0	NA	Intergenic	Lx3A|LINE|L1	-239004	NM_001195601	100503036	Mm.279725	NM_001195601	ENSMUSG00000094445	1700015G11Rik	Ccdc179	RIKEN cDNA 1700015G11 gene	protein-coding
upeaks-27165	chr2	168820646	168820861	+	0	NA	Intergenic	Intergenic	-53552	NM_175303	99377	Mm.434054	NM_175303	ENSMUSG00000027547	Sall4	5730441M18Rik|AA407717|AL022809|AW536104|C330011P20Rik|C78083|C78563|Tex20	sal-like 4 (Drosophila)	protein-coding
upeaks-36567	chr6	13587930	13588187	+	0	NA	intron (NM_028990, intron 4 of 4)	MLTR18C_MM|LTR|ERVK	20040	NM_001347059	101118	Mm.254845	NM_028990	ENSMUSG00000029569	Tmem168	5730526F17Rik|8430437G11Rik|AI462344|AI504145	transmembrane protein 168	protein-coding
upeaks-33666	chr5	18330706	18331072	+	0	NA	intron (NM_010305, intron 1 of 7)	intron (NM_010305, intron 1 of 7)	29524	NM_010305	14677	Mm.254629	NM_010305	ENSMUSG00000057614	Gnai1	AU046200|Gialpha1|Gnai-1	guanine nucleotide binding protein (G protein), alpha inhibiting 1	protein-coding
upeaks-42231	chr8	3630940	3631265	+	0	NA	promoter-TSS (NM_011503)	promoter-TSS (NM_011503)	-58	NM_011503	20911	Mm.7247	NM_011503	ENSMUSG00000004626	Stxbp2	C79054|Munc-18-2|Munc-18b|Munc18b|Sxtbp2|Sxtp2|Unc18-2|Unc18b|muSec1	syntaxin binding protein 2	protein-coding
upeaks-9181	chr12	5319291	5319692	+	0	NA	intron (NM_001164493, intron 1 of 13)	intron (NM_001164493, intron 1 of 13)	56191	NM_001164493	208439	Mm.388281	NM_001164493	ENSMUSG00000020627	Klhl29	A230106N14Rik|Gm68|Kbtbd9|mKIAA1921	kelch-like 29	protein-coding
upeaks-26263	chr2	137756405	137756781	+	0	NA	Intergenic	Intergenic	-499991	NM_001025431	228662	Mm.153405	NM_145534	ENSMUSG00000062098	Btbd3	mKIAA0952	BTB (POZ) domain containing 3	protein-coding
upeaks-20489	chr17	83123809	83124141	+	0	NA	Intergenic	Intergenic	-45750	NR_045094	100503434	Mm.187281	NR_045094		Gm19689	-	predicted gene, 19689	ncRNA
upeaks-44196	chr8	110676797	110677056	+	0	NA	intron (NM_146216, intron 13 of 18)	intron (NM_146216, intron 13 of 18)	-44550	NM_198625	244654	Mm.490385	NM_198625	ENSMUSG00000033763	Mtss1l	ABBA	metastasis suppressor 1-like	protein-coding
upeaks-13060	chr13	109918709	109918967	+	0	NA	intron (NM_011056, intron 8 of 16)	intron (NM_011056, intron 8 of 16)	15029	NR_035442	100316683		NR_035442	ENSMUSG00000084651	Mir1904	Mirn1904|mmu-mir-1904	microRNA 1904	ncRNA
upeaks-6189	chr11	20165065	20165264	+	0	NA	Intergenic	RLTR23|LTR|ERV1	-36438	NM_008996	19324	Mm.271944	NM_008996	ENSMUSG00000020149	Rab1a	Gtbp|Rab-1|Rab1|Ypt1|mKIAA3012	RAB1A, member RAS oncogene family	protein-coding
upeaks-28780	chr3	90664287	90664499	+	0	NA	Intergenic	Lx5c|LINE|L1	-4678	NM_013650	20201	Mm.21567	NM_013650	ENSMUSG00000056054	S100a8	60B8Ag|AI323541|B8Ag|CFAg|CP-10|Caga|MRP8|p8	S100 calcium binding protein A8 (calgranulin A)	protein-coding
upeaks-26769	chr2	157016901	157017240	+	0	NA	3' UTR (NM_001164663, exon 15 of 15)	3' UTR (NM_001164663, exon 15 of 15)	-9995	NM_025853	66934	Mm.25410	NM_025853	ENSMUSG00000027635	Dsn1	1700022L09Rik|AW552447	DSN1 homolog, MIS12 kinetochore complex component	protein-coding
upeaks-48125	chrX	139221015	139221221	+	0	NA	intron (NM_001164632, intron 2 of 4)	intron (NM_001164632, intron 2 of 4)	3952	NM_001164632	245631	Mm.131001	NM_175541	ENSMUSG00000042515	Mum1l1	9430086K21Rik	melanoma associated antigen (mutated) 1-like 1	protein-coding
upeaks-19414	chr17	31920620	31920946	+	0	NA	Intergenic	Intergenic	-64991	NM_010831	17691	Mm.290941	NM_010831	ENSMUSG00000024042	Sik1	Msk|Sik|Snf1lk	salt inducible kinase 1	protein-coding
upeaks-38103	chr6	100452728	100452927	+	0	NA	Intergenic	RMER5|LTR|ERV1	-74573	NR_040525	73395	Mm.69413	NR_040525	ENSMUSG00000101553	1700049E22Rik	-	RIKEN cDNA 1700049E22 gene	ncRNA
upeaks-47351	chr9	122647978	122648206	+	0	NA	Intergenic	PB1|SINE|Alu	-34784	NR_029819	387156		NR_029819	ENSMUSG00000065414	Mir138-1	Mirn138|Mirn138-1|mir-138-1	microRNA 138-1	ncRNA
upeaks-26131	chr2	132880752	132881686	+	0	NA	promoter-TSS (NM_177303)	promoter-TSS (NM_177303)	-357	NM_177303	320974	Mm.357342	NM_177303	ENSMUSG00000043110	Lrrn4	B430119L13Rik|Nlrr4	leucine rich repeat neuronal 4	protein-coding
upeaks-1841	chr1	132095642	132095882	+	0	NA	Intergenic	Intergenic	-27700	NM_001114662	213006	Mm.208445	NM_172510	ENSMUSG00000059149	Mfsd4a	A230072B04|A930031D07Rik|AI850289|Mfsd4	major facilitator superfamily domain containing 4A	protein-coding
upeaks-8296	chr11	100262137	100262339	+	0	NA	TTS (NM_212483)	TTS (NM_212483)	-1209	NM_010663	16667	Mm.14046	NM_010663	ENSMUSG00000035557	Krt17	K17|Krt1-17	keratin 17	protein-coding
upeaks-18741	chr17	3375140	3375434	+	0	NA	intron (NM_001122998, intron 1 of 26)	intron (NM_001122998, intron 1 of 26)	-21920	NM_011878	24001	Mm.137134	NM_011878	ENSMUSG00000023800	Tiam2	3000002F19Rik|STEF|mKIAA2016	T cell lymphoma invasion and metastasis 2	protein-coding
upeaks-24413	chr2	38823927	38824483	+	0	NA	intron (NM_010264, intron 3 of 10)	intron (NM_010264, intron 3 of 10)	-28530	NR_029568	387176		NR_029568	ENSMUSG00000065423	Mir181a-2	Mirn181|Mirn181a|Mirn181a-2|miR-181|mir-181a|mir-181a-2	microRNA 181a-2	ncRNA
upeaks-17952	chr16	45120916	45121256	+	0	NA	intron (NM_026439, intron 5 of 7)	intron (NM_026439, intron 5 of 7)	27033	NM_026439	67896	Mm.181074	NM_026439	ENSMUSG00000022665	Ccdc80	2610001E17Rik|DRO1|Ssg1|Urb	coiled-coil domain containing 80	protein-coding
upeaks-39453	chr7	18746503	18746935	+	0	NA	Intergenic	MMERVK9C_I-int|LTR|ERVK	28629	NM_001004152	243862	Mm.389833	NM_001004152	ENSMUSG00000044903	Psg22	AA408604|cea9	pregnancy-specific glycoprotein 22	protein-coding
upeaks-4770	chr10	81465328	81465658	+	0	NA	intron (NM_001311124, intron 9 of 11)	intron (NM_001311124, intron 9 of 11)	7638	NM_001311127	319586	Mm.152689	NM_176954	ENSMUSG00000034818	Celf5	4930565A21Rik|Brunol5	CUGBP, Elav-like family member 5	protein-coding
upeaks-37955	chr6	93718498	93718756	+	0	NA	intron (NM_001083321, intron 11 of 21)	intron (NM_001083321, intron 11 of 21)	194336	NR_104594	14924	Mm.217216	NM_010367	ENSMUSG00000045095	Magi1	AIP3|BAP1|Baiap1|Gukmi1|MAGI1c|Magi-1|TNRC19|WWP3|mKIAA4129	membrane associated guanylate kinase, WW and PDZ domain containing 1	protein-coding
upeaks-12171	chr13	58469797	58470033	+	0	NA	Intergenic	Intergenic	-66572	NM_001301341	15387	Mm.142872	NM_025279	ENSMUSG00000021546	Hnrnpk	Hnrpk|KBBP|NOVA	heterogeneous nuclear ribonucleoprotein K	protein-coding
upeaks-44836	chr9	6289186	6289709	+	0	NA	intron (NM_027924, intron 2 of 6)	intron (NM_027924, intron 2 of 6)	-22900	NM_027942	71829	Mm.141452	NM_027942	ENSMUSG00000047619	Ddi1	1700011N24Rik	DNA-damage inducible 1	protein-coding
upeaks-14951	chr14	105732153	105732910	+	0	NA	Intergenic	Intergenic	-108761	NR_105814	102465207		NR_105814	ENSMUSG00000098780	Mir6390	Gm27562|mmu-mir-6390	microRNA 6390	ncRNA
upeaks-16509	chr15	84858874	84859232	+	0	NA	Intergenic	Intergenic	-2924	NM_001081166	271305	Mm.101022	NM_001081166	ENSMUSG00000016624	Phf21b	A730032D07Rik	PHD finger protein 21B	protein-coding
upeaks-31706	chr4	100216610	100217197	+	0	NA	intron (NM_001312690, intron 1 of 3)	intron (NM_001312690, intron 1 of 3)	121112	NM_001312690	26563	Mm.57252	NM_013845	ENSMUSG00000035305	Ror1	2810404D04Rik|Ntrkr1	receptor tyrosine kinase-like orphan receptor 1	protein-coding
upeaks-23420	chr19	58419611	58420120	+	0	NA	intron (NR_104342, intron 4 of 11)	intron (NR_104342, intron 4 of 11)	35533	NR_104342	14585	Mm.88367	NM_010279	ENSMUSG00000025089	Gfra1	AU042498	glial cell line derived neurotrophic factor family receptor alpha 1	protein-coding
upeaks-18760	chr17	5051114	5051505	+	0	NA	intron (NM_001085355, intron 2 of 19)	intron (NM_001085355, intron 2 of 19)	56235	NM_001085355	239985	Mm.133401	NM_001085355	ENSMUSG00000069729	Arid1b	8030481M12|9330189K18Rik|AI836955|Ardi1b|B230217J03Rik|mKIAA1235	AT rich interactive domain 1B (SWI-like)	protein-coding
upeaks-46653	chr9	96957058	96957309	+	0	NA	intron (NM_145134, intron 2 of 2)	intron (NM_145134, intron 2 of 2)	61172	NM_145134	211949	Mm.491271	NM_145134	ENSMUSG00000046997	Spsb4	D030068E18Rik|SSB-4|Ssb4	splA/ryanodine receptor domain and SOCS box containing 4	protein-coding
upeaks-33519	chr5	3670091	3670290	+	0	NA	intron (NM_029141, intron 8 of 10)	intron (NM_029141, intron 8 of 10)	13186	NM_029154	75010	Mm.85064	NM_029141	ENSMUSG00000014529	Tmbim7	4930403J02Rik|4930500J03Rik|4930511M11Rik|Lfg5|Lgf5|Tmbim1b	transmembrane BAX inhibitor motif containing 7	protein-coding
upeaks-15173	chr14	122888553	122888815	+	0	NA	intron (NM_144844, intron 23 of 23)	intron (NM_144844, intron 23 of 23)	24481	NM_145466	223267	Mm.379358	NM_145466	ENSMUSG00000041625	Ggact	A2ld1	gamma-glutamylamine cyclotransferase	protein-coding
upeaks-25075	chr2	80426936	80427212	+	0	NA	intron (NM_011356, intron 2 of 5)	intron (NM_011356, intron 2 of 5)	20322	NM_011356	20378	Mm.427436	NM_011356	ENSMUSG00000027004	Frzb	Frp|Sfrp3|frezzled|fritz|frzb-1	frizzled-related protein	protein-coding
upeaks-33718	chr5	23013995	23014595	+	0	NA	intron (NM_001081231, intron 1 of 3)	intron (NM_001081231, intron 1 of 3)	-267411	NR_027362	330052	Mm.459265	NR_027362	ENSMUSG00000105076	A930003O13Rik	-	RIKEN cDNA A930003O13 gene	ncRNA
upeaks-15772	chr15	55441006	55441205	+	0	NA	intron (NM_181277, intron 24 of 47)	intron (NM_181277, intron 24 of 47)	116207	NM_026759	68537	Mm.236795	NM_026759	ENSMUSG00000022370	Mrpl13	1110002D09Rik	mitochondrial ribosomal protein L13	protein-coding
upeaks-36325	chr5	148836979	148837361	+	0	NA	Intergenic	MTD|LTR|ERVL-MaLR	59207	NR_131106	78015	Mm.243839	NR_131106	ENSMUSG00000085740	4930505K14Rik	-	RIKEN cDNA 4930505K14 gene	ncRNA
upeaks-45268	chr9	33768801	33769016	+	0	NA	Intergenic	RLTR49|LTR|ERVK	-273463	NR_040744	77119	Mm.367930	NR_040744	ENSMUSG00000098758	7630403G23Rik	-	RIKEN cDNA 7630403G23 gene	ncRNA
upeaks-6852	chr11	54254160	54254368	+	0	NA	Intergenic	Intergenic	-4365	NM_009969	12981	Mm.4922	NM_009969	ENSMUSG00000018916	Csf2	Csfgm|GMCSF|Gm-CSf|MGI-IGM	colony stimulating factor 2 (granulocyte-macrophage)	protein-coding
upeaks-21107	chr18	33293028	33293227	+	0	NA	Intergenic	Intergenic	-79265	NM_001347624	170459	Mm.127058	NM_133774	ENSMUSG00000024378	Stard4	4632419C16Rik|9030213J02Rik	StAR-related lipid transfer (START) domain containing 4	protein-coding
upeaks-40632	chr7	79797240	79797520	+	0	NA	Intergenic	Intergenic	-3790	NM_008588	17292	Mm.1404	NM_008588	ENSMUSG00000030544	Mesp1	bHLHc5	mesoderm posterior 1	protein-coding
upeaks-47587	chrX	38738045	38738412	+	0	NA	Intergenic	RLTR13A1|LTR|ERVK	-34552	NM_183126	77883	Mm.113311	NM_183126	ENSMUSG00000051361	6030498E09Rik	-	RIKEN cDNA 6030498E09 gene	protein-coding
upeaks-6367	chr11	30501121	30501320	+	0	NA	Intergenic	RLTR1A2_MM|LTR|ERV1	-29391	NM_001100394	75087	Mm.159422	NM_001100394	ENSMUSG00000040919	4930505A04Rik	-	RIKEN cDNA 4930505A04 gene	protein-coding
upeaks-47691	chrX	58042858	58043062	+	0	NA	Intergenic	RLTR23|LTR|ERV1	12332	NM_009575	22773	Mm.255890	NM_009575	ENSMUSG00000067860	Zic3	Bn|Ka	zinc finger protein of the cerebellum 3	protein-coding
upeaks-32821	chr4	137212147	137212428	+	0	NA	Intergenic	Intergenic	-47221	NR_040443	100503595	Mm.421314	NR_040443	ENSMUSG00000085833	Gm13003	OTTMUSG00000009822	predicted gene 13003	ncRNA
upeaks-6419	chr11	32580608	32580807	+	0	NA	intron (NM_009288, intron 4 of 18)	intron (NM_009288, intron 4 of 18)	47441	NM_009288	20868	Mm.8235	NM_009288	ENSMUSG00000020272	Stk10	Gek1|Lok|mKIAA4026	serine/threonine kinase 10	protein-coding
upeaks-30300	chr3	157593218	157593543	+	0	NA	intron (NM_011196, intron 1 of 2)	Lx5|LINE|L1	26488	NM_011196	19218	Mm.30424	NM_011196	ENSMUSG00000040016	Ptger3	EP3|Pgerep3|Ptgerep3	prostaglandin E receptor 3 (subtype EP3)	protein-coding
upeaks-21613	chr18	60963201	60963838	+	0	NA	promoter-TSS (NM_001286809)	promoter-TSS (NM_001286809)	-35	NM_001286809	12322	Mm.131530	NM_009792	ENSMUSG00000024617	Camk2a	CaMKII|R74975|mKIAA0968	calcium/calmodulin-dependent protein kinase II alpha	protein-coding
upeaks-12229	chr13	61476494	61476700	+	0	NA	Intergenic	L1_Mur2|LINE|L1	65242	NM_022326	64139	Mm.279933	NM_022326	ENSMUSG00000074871	Ctsm	1600027J17Rik|AI324100|Catm	cathepsin M	protein-coding
upeaks-19436	chr17	32415847	32416050	+	0	NA	exon (NM_021319, exon 4 of 5)	exon (NM_021319, exon 4 of 5)	5027	NR_073184	57757	Mm.86752	NM_021319	ENSMUSG00000079563	Pglyrp2	C730002N09Rik|PGRP-L|Pglyrpl|tagL	peptidoglycan recognition protein 2	protein-coding
upeaks-5888	chr11	3998320	3998535	+	0	NA	exon (NM_001177703, exon 3 of 3)	exon (NM_001177703, exon 3 of 3)	8494	NM_001177691	53897	Mm.103414	NM_016922	ENSMUSG00000049721	Gal3st1	Cst|Gcst	galactose-3-O-sulfotransferase 1	protein-coding
upeaks-4443	chr10	71477327	71477737	+	0	NA	Intergenic	Intergenic	129769	NM_001347191	69718	Mm.245867	NM_027184	ENSMUSG00000060733	Ipmk	2410017C19Rik|AA408208|Impk	inositol polyphosphate multikinase	protein-coding
upeaks-44770	chr8	128098674	128098878	+	0	NA	Intergenic	Intergenic	179449	NR_105822	102465212		NR_105822	ENSMUSG00000099326	Mir21c	Gm28013|mmu-mir-21c	microRNA 21c	ncRNA
upeaks-42986	chr8	48688197	48688474	+	0	NA	Intergenic	MLT1K|LTR|ERVL-MaLR	-13645	NM_011857	23965	Mm.42191	NM_011857	ENSMUSG00000031561	Tenm3	2610100B16Rik|Odz1|Odz3|Ten-m3|mKIAA1455	teneurin transmembrane protein 3	protein-coding
upeaks-25521	chr2	107068335	107068535	+	0	NA	Intergenic	PB1D7|SINE|Alu	-8784	NM_008045	14308	Mm.249525	NM_008045	ENSMUSG00000027120	Fshb	FSH|FSH-B|FSH-beta|Fshbeta	follicle stimulating hormone beta	protein-coding
upeaks-25362	chr2	99977282	99977626	+	0	NA	Intergenic	RLTR34D_MM|LTR|ERVK	-1647294	NM_009020	19374	Mm.4988	NM_009020	ENSMUSG00000032864	Rag2	Rag-2	recombination activating gene 2	protein-coding
upeaks-26155	chr2	133429549	133430020	+	0	NA	Intergenic	Arthur1B|DNA|hAT-Tip100	-122375	NM_007553	12156	Mm.103205	NM_007553	ENSMUSG00000027358	Bmp2	AI467020|Bmp2a	bone morphogenetic protein 2	protein-coding
upeaks-9189	chr12	6482154	6482353	+	0	NA	Intergenic	L1_Mus3|LINE|L1	898077	NR_045045	73575	Mm.179463	NR_045045	ENSMUSG00000102096	1700101O22Rik	-	RIKEN cDNA 1700101O22 gene	ncRNA
upeaks-37056	chr6	42862763	42863056	+	0	NA	Intergenic	Intergenic	25026	NM_147064	259067	Mm.451673	NM_147064	ENSMUSG00000049168	Olfr449	MOR103-1	olfactory receptor 449	protein-coding
upeaks-39003	chr6	141590640	141590965	+	0	NA	Intergenic	RLTR22_Mus|LTR|ERVK	-38716	NM_020495	28253	Mm.272223	NM_020495	ENSMUSG00000030236	Slco1b2	7330442B20Rik|OATP-C|OATP2|Oatp1b2|Oatp4|Slc21a10|Slc21a6|lst-1|mlst-1	solute carrier organic anion transporter family, member 1b2	protein-coding
upeaks-29434	chr3	118145785	118146144	+	0	NA	Intergenic	Intergenic	-277028	NM_001190156	76561	Mm.33824	NM_029655	ENSMUSG00000028007	Snx7	2510028H01Rik	sorting nexin 7	protein-coding
upeaks-42280	chr8	8220206	8220548	+	0	NA	Intergenic	UCON28a|Unknown|Unknown	440396	NM_010111	13642	Mm.209813	NM_010111	ENSMUSG00000001300	Efnb2	ELF-2|Epl5|Eplg5|Htk-L|LERK-5|Lerk5|NLERK-1	ephrin B2	protein-coding
upeaks-42599	chr8	25371295	25371638	+	0	NA	Intergenic	Intergenic	-65196	NR_040352	74489	Mm.256468	NR_040352	ENSMUSG00000110140	5430421F17Rik	-	RIKEN cDNA 5430421F17 gene	ncRNA
upeaks-34104	chr5	37977126	37977466	+	0	NA	Intergenic	Intergenic	-61934	NM_001289535	71116	Mm.18959	NM_026959	ENSMUSG00000029125	Stx18	1810035L21Rik|4933425D03Rik|AU041562	syntaxin 18	protein-coding
upeaks-20301	chr17	72937605	72937920	+	0	NA	intron (NM_029999, intron 2 of 2)	intron (NM_029999, intron 2 of 2)	19457	NM_029999	77889	Mm.154109	NM_029999	ENSMUSG00000024063	Lbh	1810009F10Rik|6720416L16Rik	limb-bud and heart	protein-coding
upeaks-26419	chr2	145503511	145503740	+	0	NA	intron (NM_053195, intron 3 of 16)	intron (NM_053195, intron 3 of 16)	51357	NM_001037929	627302	Mm.445953	NM_001037929		Gm14092	OTTMUSG00000015643	predicted gene 14092	protein-coding
upeaks-44948	chr9	14689377	14690058	+	0	NA	Intergenic	Intergenic	51016	NM_177905	330890	Mm.334969	NM_177905	ENSMUSG00000036912	Piwil4	9230101H05Rik|Miwi2	piwi-like RNA-mediated gene silencing 4	protein-coding
upeaks-38056	chr6	99312868	99313067	+	0	NA	intron (NM_001347345, intron 2 of 19)	intron (NM_001347345, intron 2 of 19)	-46452	NM_001197321	108655	Mm.234965	NM_053202	ENSMUSG00000030067	Foxp1	3110052D19Rik|4932443N09Rik|AI461938|AW494214	forkhead box P1	protein-coding
upeaks-39321	chr7	6849587	6849807	+	0	NA	intron (NM_021323, intron 2 of 7)	MER34A|LTR|ERV1	46110	NR_037213	100499513		NR_037213	ENSMUSG00000092815	Mir3099	mir-3099|mmu-mir-3099	microRNA 3099	ncRNA
upeaks-18216	chr16	66013731	66013939	+	0	NA	Intergenic	B1_Mur4|SINE|Alu	198202	NM_028572	73569	Mm.25670	NM_028572	ENSMUSG00000091243	Vgll3	1700110N18Rik|4832416J22|C80713|Vgl-3|Vito-2	vestigial like family member 3	protein-coding
upeaks-11290	chr13	18154147	18154414	+	0	NA	intron (NM_175006, intron 4 of 7)	intron (NM_175006, intron 4 of 7)	-54078	NR_046032	73992	Mm.159110	NR_046032		4930448F12Rik	-	RIKEN cDNA 4930448F12 gene	ncRNA
upeaks-34935	chr5	102273404	102273612	+	0	NA	Intergenic	(CATTC)n|Simple_repeat|Simple_repeat	-203587	NM_172882	72145	Mm.332522	NM_172882	ENSMUSG00000043940	Wdfy3	2610509D04Rik|ALFY|AW319683|B930017C24|BWF1|Bchs|D5Ertd66e|Ggtb3|ZFYVE25|mKIAA0993	WD repeat and FYVE domain containing 3	protein-coding
upeaks-5519	chr10	119549723	119550006	+	0	NA	intron (NM_133442, intron 1 of 21)	L1MCb|LINE|L1	95830	NM_001277292	74053	Mm.196692	NM_028736	ENSMUSG00000034813	Grip1	4931400F03Rik|GRIP|eb	glutamate receptor interacting protein 1	protein-coding
upeaks-5296	chr10	108623058	108623490	+	0	NA	intron (NM_001252341, intron 9 of 11)	intron (NM_001252341, intron 9 of 11)	76886	NM_203660	368203	Mm.452758	NM_203660		Gm5136	C6.1AL|EG368203	predicted gene 5136	protein-coding
upeaks-10900	chr12	112491998	112492326	+	0	NA	intron (NM_177039, intron 1 of 4)	intron (NM_177039, intron 1 of 4)	2714	NM_177039	319942	Mm.185209	NM_177039	ENSMUSG00000043122	A530016L24Rik	Nrac	RIKEN cDNA A530016L24 gene	protein-coding
upeaks-19723	chr17	45802444	45802744	+	0	NA	Intergenic	Intergenic	-68750	NM_028164	72240	Mm.482897	NM_028164	ENSMUSG00000094690	1600014C23Rik	-	RIKEN cDNA 1600014C23 gene	protein-coding
upeaks-1468	chr1	99511916	99512139	+	0	NA	Intergenic	Intergenic	-260738	NM_172851	241175	Mm.251301	NM_172851	ENSMUSG00000067028	Cntnap5b	C230078M14Rik|Caspr5-2	contactin associated protein-like 5B	protein-coding
upeaks-34953	chr5	103435502	103435760	+	0	NA	intron (NM_011204, intron 1 of 47)	intron (NM_011204, intron 1 of 47)	10439	NM_011204	19249	Mm.3414	NM_011204	ENSMUSG00000034573	Ptpn13	AI324989|PTP-BL|PTPL1|Ptpri|RIP	protein tyrosine phosphatase, non-receptor type 13	protein-coding
upeaks-12215	chr13	60286875	60287180	+	0	NA	Intergenic	Intergenic	81556	NR_036449	100503759	Mm.38101	NM_177810		Gm5084	A030007L22|EG328264	predicted gene 5084	ncRNA
upeaks-15386	chr15	25226267	25226524	+	0	NA	Intergenic	Intergenic	187369	NM_027395	70350	Mm.29586	NM_027395	ENSMUSG00000045763	Basp1	2610024P12Rik|CAP-23|CAP23|Ckap3|NAP-22|NAP22	brain abundant, membrane attached signal protein 1	protein-coding
upeaks-38671	chr6	126921628	126921926	+	0	NA	promoter-TSS (NM_207210)	promoter-TSS (NM_207210)	62	NM_207210	101320	Mm.44896	NM_207210	ENSMUSG00000030345	Dyrk4	AW049118|Dyrk4a|Dyrk4b	dual-specificity tyrosine-(Y)-phosphorylation regulated kinase 4	protein-coding
upeaks-44983	chr9	17265144	17265347	+	0	NA	Intergenic	Intergenic	-887014	NM_001080814	270120	Mm.195010	NM_001080814	ENSMUSG00000074505	Fat3	9430076A06Rik|D430038H04Rik|Gm1132|Gm510|MFAT3F	FAT atypical cadherin 3	protein-coding
upeaks-47156	chr9	116254913	116255121	+	0	NA	Intergenic	B1F|SINE|Alu	-79654	NM_009371	21813	Mm.172346	NM_009371	ENSMUSG00000032440	Tgfbr2	1110020H15Rik|AU042018|DNIIR|RIIDN|TBR-II|TbetaR-II|TbetaRII	transforming growth factor, beta receptor II	protein-coding
upeaks-3393	chr10	7117871	7118144	+	0	NA	Intergenic	B4A|SINE|B4	94230	NM_172546	215748	Mm.37984	NM_172546	ENSMUSG00000015202	Cnksr3	6820402C05|BC024086|Magi1	Cnksr family member 3	protein-coding
upeaks-29642	chr3	127874242	127874555	+	0	NA	intron (NM_027482, intron 1 of 1)	intron (NM_027482, intron 1 of 1)	21925	NM_027482	70617	Mm.317049	NM_027482	ENSMUSG00000050549	5730508B09Rik	2700063A17Rik|C80506	RIKEN cDNA 5730508B09 gene	protein-coding
upeaks-3427	chr10	8762206	8762692	+	0	NA	intron (NM_175155, intron 8 of 19)	intron (NM_175155, intron 8 of 19)	123621	NM_175155	70097	Mm.338275	NM_175155	ENSMUSG00000015305	Sash1	1100001C18Rik|2500002E12Rik|A330076K04Rik|mKIAA0790	SAM and SH3 domain containing 1	protein-coding
upeaks-28333	chr3	67709353	67709611	+	0	NA	Intergenic	Intergenic	126714	NM_025813	66868	Mm.491153	NM_025813	ENSMUSG00000027775	Mfsd1	1200003O06Rik	major facilitator superfamily domain containing 1	protein-coding
upeaks-46382	chr9	81479418	81479979	+	0	NA	Intergenic	Intergenic	-152232	NR_040394	319405	Mm.246494	NR_040393	ENSMUSG00000097466	D430036J16Rik	-	RIKEN cDNA D430036J16 gene	ncRNA
upeaks-21894	chr18	73907022	73907337	+	0	NA	Intergenic	Intergenic	47794	NM_027741	71263	Mm.126220	NM_027741	ENSMUSG00000064036	Mro	4930507C04Rik|4933435E20Rik	maestro	protein-coding
upeaks-46535	chr9	89915921	89916143	+	0	NA	TTS (NM_001039655)	TTS (NM_001039655)	6257	NM_001039655	19417	Mm.44561	NM_011245	ENSMUSG00000032356	Rasgrf1	AI844718|CDC25|CDC25Mm|Gnrp|Grf1|Grfbeta|P190-A|Ras-GRF1|p190|p190RhoGEF	RAS protein-specific guanine nucleotide-releasing factor 1	protein-coding
upeaks-10968	chr12	114292251	114292545	+	0	NA	Intergenic	RLTR13A1|LTR|ERVK	177068	NR_106062	102465663		NR_106062	ENSMUSG00000105438	Mir7094-1	mmu-mir-7094-1	microRNA 7094-1	ncRNA
upeaks-1137	chr1	84366830	84367049	+	0	NA	Intergenic	Intergenic	-82294	NM_001003948	98496	Mm.187470	NM_001003948	ENSMUSG00000045658	Pid1	5033414K04Rik|NYGGF4	phosphotyrosine interaction domain containing 1	protein-coding
upeaks-47877	chrX	98898931	98899130	+	0	NA	Intergenic	PB1|SINE|Alu	-8005	NM_001313756	94190	Mm.33536	NM_052976	ENSMUSG00000031214	Ophn1	C130037N19Rik|Wtgr	oligophrenin 1	protein-coding
upeaks-15900	chr15	62158810	62159328	+	0	NA	intron (NR_003368, intron 3 of 8)	intron (NR_003368, intron 3 of 8)	60382	NR_003523	67552	Mm.484027	NM_026230		H2afy3	4933432H23Rik	H2A histone family, member Y3	pseudo
upeaks-16209	chr15	77313626	77314047	+	0	NA	Intergenic	Intergenic	-6783	NM_175387	93686	Mm.202774	NM_053104	ENSMUSG00000033565	Rbfox2	Fbm2|Fxh|Hrnbp2|Rbm9	RNA binding protein, fox-1 homolog (C. elegans) 2	protein-coding
upeaks-22948	chr19	40467948	40468251	+	0	NA	intron (NM_178362, intron 1 of 28)	intron (NM_178362, intron 1 of 28)	-16701	NM_001034962	20411	Mm.210815	NM_009166	ENSMUSG00000025006	Sorbs1	2310065E01Rik|9530001P15Rik|CAP|SH3P12|Sh3d5|mKIAA1296	sorbin and SH3 domain containing 1	protein-coding
upeaks-20119	chr17	64492192	64492391	+	0	NA	Intergenic	RLTR26_Mus|LTR|ERVK	51485	NR_105848	102465228		NR_105848	ENSMUSG00000098984	Mir6420	Gm28007|mmu-mir-6420	microRNA 6420	ncRNA
upeaks-38863	chr6	135550660	135550914	+	0	NA	Intergenic	(TCCTG)n|Simple_repeat|Simple_repeat	-108126	NR_126088	75024	Mm.399147	NR_126088	ENSMUSG00000107396	4930425L21Rik	4930473P14Rik	RIKEN cDNA 4930425L21 gene	ncRNA
upeaks-12964	chr13	104635992	104636519	+	0	NA	intron (NM_026072, intron 13 of 13)	intron (NM_026072, intron 13 of 13)	180698	NM_026072	67285	Mm.235398	NM_026072	ENSMUSG00000021715	Cwc27	3110009E13Rik|NY-CO-10|Sdccag10	CWC27 spliceosome-associated protein	protein-coding
upeaks-22223	chr18	88932120	88932466	+	0	NA	Intergenic	Intergenic	-38086	NM_018821	54607	Mm.91920	NM_018821	ENSMUSG00000056153	Socs6	1500012M23Rik|5830401B18Rik|AI447482|Cis4|Cish4|HSPC060|SOCS-4|SOCS-6|SSI4|STAI4|STATI4|Socs4	suppressor of cytokine signaling 6	protein-coding
upeaks-29093	chr3	102198638	102198880	+	0	NA	intron (NM_177545, intron 1 of 7)	intron (NM_177545, intron 1 of 7)	5934	NM_177545	229658	Mm.118004	NM_177545	ENSMUSG00000027860	Vangl1	Kitenin|Lpp2|Stb2|Stbm	vang-like 1 (van gogh, Drosophila)	protein-coding
upeaks-32085	chr4	117333434	117333767	+	0	NA	intron (NM_025739, intron 2 of 14)	intron (NM_025739, intron 2 of 14)	41861	NM_001310729	66743	Mm.318331	NM_025739	ENSMUSG00000028677	Rnf220	4732477A13|4931406I20Rik|5730503K05Rik|AV302541	ring finger protein 220	protein-coding
upeaks-10994	chr12	117159037	117159261	+	0	NA	intron (NM_011215, intron 12 of 22)	intron (NM_011215, intron 12 of 22)	-7880	NR_033538	100038689	Mm.445351	NR_033538	ENSMUSG00000099907	Gm10421	ENSMUSG00000072792	predicted gene 10421	ncRNA
upeaks-44862	chr9	7959330	7959637	+	0	NA	intron (NM_009534, intron 4 of 7)	intron (NM_009534, intron 4 of 7)	45113	NM_001171147	22601	Mm.221992	NM_009534	ENSMUSG00000053110	Yap1	AI325207|Yap|Yap65|Yki|Yorkie	yes-associated protein 1	protein-coding
upeaks-10839	chr12	111139899	111140100	+	0	NA	Intergenic	B1F|SINE|Alu	-26371	NM_001286122	22031	Mm.27431	NM_011632	ENSMUSG00000021277	Traf3	AI528849|CAP-1|CD40bp|CRAF1|LAP1|T-BAM|amn	TNF receptor-associated factor 3	protein-coding
upeaks-18524	chr16	91417035	91417269	+	0	NA	intron (NM_008349, intron 4 of 6)	intron (NM_008349, intron 4 of 6)	10917	NM_008349	16155	Mm.4154	NM_008349	ENSMUSG00000022969	Il10rb	6620401D04Rik|AI528744|CRF2-4|Crfb4|D16H21S58|D21S58h|IL-10R2|Il10r2	interleukin 10 receptor, beta	protein-coding
upeaks-3008	chr1	183188132	183188402	+	0	NA	intron (NM_001278218, intron 1 of 8)	intron (NM_001278218, intron 1 of 8)	33262	NM_001278219	68897	Mm.327216	NM_026866	ENSMUSG00000030768	Disp1	1190008H24Rik|DispA	dispatched RND transporter family member 1	protein-coding
upeaks-18454	chr16	89789910	89790340	+	0	NA	intron (NM_009384, intron 27 of 27)	intron (NM_009384, intron 27 of 27)	28227	NM_001145887	21844	Mm.310902	NM_009384	ENSMUSG00000002489	Tiam1	AI847750|D16Ium10|D16Ium10e	T cell lymphoma invasion and metastasis 1	protein-coding
upeaks-33735	chr5	23942649	23942864	+	0	NA	intron (NM_001310471, intron 10 of 10)	RMER6C|LTR|ERVK	87556	NM_001310471	84652	Mm.304976	NM_053090	ENSMUSG00000028995	Fam126a	AB030242|Drctnnb1a	family with sequence similarity 126, member A	protein-coding
upeaks-6110	chr11	16675975	16676293	+	0	NA	Intergenic	RLTR9B2|LTR|ERVK	-76069	NM_207655	13649	Mm.8534	NM_007912	ENSMUSG00000020122	Egfr	9030024J15Rik|AI552599|Erbb|Errb1|Errp|Wa5|wa-2|wa2	epidermal growth factor receptor	protein-coding
upeaks-43204	chr8	68416684	68416952	+	0	NA	intron (NM_172753, intron 4 of 9)	intron (NM_172753, intron 4 of 9)	48359	NR_038181	73609	Mm.443247	NR_038181	ENSMUSG00000085197	1700125H03Rik	4930510D22Rik	RIKEN cDNA 1700125H03 gene	ncRNA
upeaks-18488	chr16	90449585	90450367	+	0	NA	intron (NM_015755, intron 3 of 10)	intron (NM_015755, intron 3 of 10)	63579	NM_015755	26559	Mm.125874	NM_015755	ENSMUSG00000053414	Hunk	Bstk1|Mak-v	hormonally upregulated Neu-associated kinase	protein-coding
upeaks-44318	chr8	116384064	116384397	+	0	NA	Intergenic	Intergenic	-120785	NM_029297	75465	Mm.23114	NM_029297	ENSMUSG00000034467	Dynlrb2	1700009A04Rik|DNLC2B|Dncl2b	dynein light chain roadblock-type 2	protein-coding
upeaks-44781	chr8	128371910	128372142	+	0	NA	intron (NM_008737, intron 2 of 16)	intron (NM_008737, intron 2 of 16)	12785	NR_035436	100316680		NR_035436	ENSMUSG00000084523	Mir1903	Mirn1903|mmu-mir-1903	microRNA 1903	ncRNA
upeaks-5211	chr10	103958277	103958654	+	0	NA	Intergenic	Intergenic	-184522	NM_001270898	100861880	Mm.441727	NM_001270898	ENSMUSG00000091779	Gm21293	-	predicted gene, 21293	protein-coding
upeaks-18236	chr16	70992244	70992446	+	0	NA	Intergenic	(CATTC)n|Simple_repeat|Simple_repeat	-138731	NR_040561	70972	Mm.399391	NR_040561		4931420L22Rik	-	RIKEN cDNA 4931420L22 gene	ncRNA
upeaks-21424	chr18	49711582	49712322	+	0	NA	intron (NM_001170960, intron 2 of 3)	MER68|LTR|ERVL	43649	NM_001170960	68857	Mm.96010	NM_026854	ENSMUSG00000024505	Dtwd2	1190002H09Rik|8030470C17Rik|AI414673|BB115449	DTW domain containing 2	protein-coding
upeaks-25115	chr2	84381092	84381291	+	0	NA	intron (NM_018782, intron 2 of 15)	intron (NM_018782, intron 2 of 15)	44075	NM_018782	54598	Mm.75467	NM_018782	ENSMUSG00000059588	Calcrl	AV071593|CRLR	calcitonin receptor-like	protein-coding
upeaks-36369	chr5	149644010	149644215	+	0	NA	Intergenic	ID_B1|SINE|B4	-7776	NM_001347534	15505	Mm.270681	NM_013559	ENSMUSG00000029657	Hsph1	105kDa|AI790491|Hsp105|Hsp110|hsp-E7I|hsp110/105	heat shock 105kDa/110kDa protein 1	protein-coding
upeaks-25533	chr2	108090347	108090681	+	0	NA	Intergenic	Intergenic	799925	NM_021275	16492	Mm.142718	NM_021275	ENSMUSG00000042604	Kcna4	Kv1.4	potassium voltage-gated channel, shaker-related subfamily, member 4	protein-coding
upeaks-3686	chr10	25061609	25062080	+	0	NA	Intergenic	Intergenic	-134374	NM_007482	11846	Mm.154144	NM_007482	ENSMUSG00000019987	Arg1	AI|AI256583|Arg-1|PGIF	arginase, liver	protein-coding
upeaks-39645	chr7	25907339	25907548	+	0	NA	intron (NM_009999, intron 1 of 8)	intron (NM_009999, intron 1 of 8)	9785	NM_009999	13088	Mm.218749	NM_009999	ENSMUSG00000030483	Cyp2b10	Cyp2b|Cyp2b20|p16	cytochrome P450, family 2, subfamily b, polypeptide 10	protein-coding
upeaks-30664	chr4	30408602	30408801	+	0	NA	Intergenic	L1_Mus3|LINE|L1	-255895	NR_040655	75332	Mm.108636	NR_040655		4930556G01Rik	-	RIKEN cDNA 4930556G01 gene	ncRNA
upeaks-1308	chr1	90303980	90304179	+	0	NA	Intergenic	Intergenic	100099	NM_001271607	12778	Mm.6522	NM_007722	ENSMUSG00000044337	Ackr3	AW541270|CXC-R7|CXCR-7|Cmkor1|Cxcr7|RDC-1|Rdc1	atypical chemokine receptor 3	protein-coding
upeaks-26163	chr2	133587909	133588108	+	0	NA	Intergenic	Intergenic	23300	NR_037273	100526500		NR_037273	ENSMUSG00000093338	Mir3090	mmu-mir-3090	microRNA 3090	ncRNA
upeaks-4032	chr10	45025174	45025595	+	0	NA	Intergenic	Intergenic	-41830	NM_011156	19072	Mm.10281	NM_011156	ENSMUSG00000019849	Prep	AI047692|AI450383|D10Wsu136e|PEP|Pop	prolyl endopeptidase	protein-coding
upeaks-6599	chr11	43719246	43719561	+	0	NA	intron (NM_001164231, intron 3 of 3)	intron (NM_001164231, intron 3 of 3)	28570	NM_133795	66827	Mm.271974	NM_133795	ENSMUSG00000041278	Ttc1	4833412C19Rik|C79328|TPR1	tetratricopeptide repeat domain 1	protein-coding
upeaks-29427	chr3	117646128	117646629	+	0	NA	intron (NM_001305451, intron 3 of 5)	intron (NM_001305451, intron 3 of 5)	71151	NM_029425	75769	Mm.72187	NM_029425	ENSMUSG00000033342	Plppr5	4833424O15Rik|Lppr5|PRG-5|Pap2d	phospholipid phosphatase related 5	protein-coding
upeaks-36938	chr6	37216538	37216742	+	0	NA	intron (NM_001347104, intron 1 of 32)	intron (NM_001347104, intron 1 of 32)	83336	NM_001081206	320127	Mm.119469	NM_001081206	ENSMUSG00000038665	Dgki	C130010K08Rik	diacylglycerol kinase, iota	protein-coding
upeaks-24453	chr2	44667167	44667550	+	0	NA	intron (NM_172662, intron 5 of 10)	intron (NM_172662, intron 5 of 10)	194264	NM_172662	227835	Mm.314312	NM_172662	ENSMUSG00000036890	Gtdc1	E330008O22Rik	glycosyltransferase-like domain containing 1	protein-coding
upeaks-26534	chr2	149755115	149755314	+	0	NA	Intergenic	Lx5c|LINE|L1	-75569	NM_001085521	433485	Mm.330649	NM_001085521	ENSMUSG00000074736	Syndig1	AW123113|DSPC2|Gm14134|H2C20orf39|OTTMUSG00000015750|Tmem90b	synapse differentiation inducing 1	protein-coding
upeaks-14970	chr14	109176754	109177085	+	0	NA	Intergenic	Lx3A|LINE|L1	-262680	NM_199065	76965	Mm.257268	NM_199065	ENSMUSG00000075478	Slitrk1	3200001I04Rik	SLIT and NTRK-like family, member 1	protein-coding
upeaks-6097	chr11	14770012	14770289	+	0	NA	Intergenic	MURVY-LTR|LTR|ERV1	170910	NM_001164166	432536	Mm.33646	NM_001164166	ENSMUSG00000084135	Pom121l12	1700054H16Rik	POM121 membrane glycoprotein-like 12	protein-coding
upeaks-28351	chr3	68660918	68661151	+	0	NA	Intergenic	Intergenic	-29610	NM_001159424	16159	Mm.103783	NM_008351	ENSMUSG00000027776	Il12a	IL-12p35|Il-12a|Ll12a|p35	interleukin 12a	protein-coding
upeaks-14461	chr14	67484563	67484831	+	0	NA	Intergenic	Intergenic	-86955	NR_045961	73977	Mm.414915	NR_045961	ENSMUSG00000093472	4930438E09Rik	-	RIKEN cDNA 4930438E09 gene	ncRNA
upeaks-29095	chr3	102253070	102253269	+	0	NA	Intergenic	Intergenic	-9236	NR_040391	319951	Mm.225196	NR_040391	ENSMUSG00000105891	A230001M10Rik	-	RIKEN cDNA A230001M10 gene	ncRNA
upeaks-23646	chr2	12060238	12060771	+	0	NA	Intergenic	Intergenic	-240742	NR_040353	338535	Mm.483275	NR_040353	ENSMUSG00000086843	E030013I19Rik	-	RIKEN cDNA E030013I19 gene	ncRNA
upeaks-23955	chr2	27195809	27196049	+	0	NA	intron (NM_138665, intron 19 of 20)	intron (NM_138665, intron 19 of 20)	30422	NM_138942	13166	Mm.167781	NM_138942	ENSMUSG00000000889	Dbh	-	dopamine beta hydroxylase	protein-coding
upeaks-27634	chr3	14871496	14871736	+	0	NA	exon (NM_007606, exon 7 of 7)	exon (NM_007606, exon 7 of 7)	8078	NM_007606	12350	Mm.300	NM_007606	ENSMUSG00000027559	Car3	BB219044|Ca3|Car-3	carbonic anhydrase 3	protein-coding
upeaks-31077	chr4	56685221	56685535	+	0	NA	Intergenic	Intergenic	56047	NM_025271	11471	Mm.251434	NM_025271	ENSMUSG00000070980	Actl7b	Tact1	actin-like 7b	protein-coding
upeaks-1937	chr1	134152995	134153213	+	0	NA	Intergenic	L2|LINE|L2	-29300	NM_007695	12654	Mm.38274	NM_007695	ENSMUSG00000064246	Chil1	AW208766|Brp39|Chi3l1|Gp39	chitinase-like 1	protein-coding
upeaks-38180	chr6	108081327	108081711	+	0	NA	Intergenic	L1_Mus3|LINE|L1	16474	NM_001276356	74729	Mm.56539	NM_178391	ENSMUSG00000034639	Setmar	5830404F24Rik|Etet2	SET domain without mariner transposase fusion	protein-coding
upeaks-39213	chr7	3201297	3201783	+	0	NA	Intergenic	Intergenic	-17086	NR_029640	100049710		NR_029640	ENSMUSG00000077815	Mir290a	Mir290|Mirn290|mir-290a|mmu-miR-290|mmu-mir-290a	microRNA 290a	ncRNA
upeaks-41821	chr7	131967404	131967684	+	0	NA	exon (NM_173410, exon 1 of 3)	exon (NM_173410, exon 1 of 3)	1084	NM_173410	233919	Mm.208740	NM_173410	ENSMUSG00000040125	Gpr26	9630036A11Rik|A730021D22	G protein-coupled receptor 26	protein-coding
upeaks-46103	chr9	67429184	67429526	+	0	NA	intron (NM_001081242, intron 2 of 57)	B4A|SINE|B4	130348	NM_001081242	70549	Mm.33645	NM_027458	ENSMUSG00000052698	Tln2	5730421P04Rik|AI507121|AI787438|AL118320|mKIAA0320	talin 2	protein-coding
upeaks-29374	chr3	115737904	115738303	+	0	NA	Intergenic	Intergenic	-23048	NM_007901	13609	Mm.982	NM_007901	ENSMUSG00000045092	S1pr1	AI849002|Edg1|Lpb1|S1p|S1p1	sphingosine-1-phosphate receptor 1	protein-coding
upeaks-19295	chr17	28386248	28386498	+	0	NA	Intergenic	Intergenic	-21230	NM_021478	22157	Mm.42102	NM_021478	ENSMUSG00000037446	Tulp1	Tulp1l	tubby like protein 1	protein-coding
upeaks-937	chr1	74180134	74180368	+	0	NA	Intergenic	Intergenic	14380	NM_178241	227288	Mm.337035	NM_178241	ENSMUSG00000048480	Cxcr1	Il8ra	chemokine (C-X-C motif) receptor 1	protein-coding
upeaks-32001	chr4	114924979	114925524	+	0	NA	exon (NM_015758, exon 1 of 1)	exon (NM_015758, exon 1 of 1)	762	NM_015758	30923	Mm.377122	NM_015758	ENSMUSG00000044518	Foxe3	FREAC8|dyl|rct	forkhead box E3	protein-coding
upeaks-34605	chr5	77026081	77026289	+	0	NA	intron (NM_027970, intron 1 of 8)	PB1D11|SINE|Alu	-7322	NR_077218	68246	Mm.319633	NR_077218	ENSMUSG00000086632	1700112J05Rik	1700110A09Rik	RIKEN cDNA 1700112J05 gene	ncRNA
upeaks-7601	chr11	78786120	78786344	+	0	NA	Intergenic	Intergenic	-34503	NM_197989	69109	Mm.341420	NM_197989	ENSMUSG00000049489	Fam58b	1810009O10Rik|Fam58a	family with sequence similarity 58, member B	protein-coding
upeaks-8110	chr11	96397972	96398254	+	0	NA	Intergenic	MIR|SINE|MIR	32355	NM_008266	15407	Mm.890	NM_008266	ENSMUSG00000018973	Hoxb1	Hox-2.9	homeobox B1	protein-coding
upeaks-31884	chr4	108349886	108350351	+	0	NA	Intergenic	Intergenic	21966	NM_027250	69893	Mm.28354	NM_027250	ENSMUSG00000048351	Coa7	2010305A19Rik|AI451324|D4Ertd796e|Selrc1	cytochrome c oxidase assembly factor 7	protein-coding
upeaks-44102	chr8	106112101	106112319	+	0	NA	intron (NM_010901, intron 9 of 9)	(CACTC)n|Simple_repeat|Simple_repeat	-23190	NR_040346	69771	Mm.393274	NR_040344		1810019D21Rik	-	RIKEN cDNA 1810019D21 gene	ncRNA
upeaks-40994	chr7	99125049	99125248	+	0	NA	intron (NM_178635, intron 1 of 14)	PB1D9|SINE|Alu	15996	NM_178635	78610	Mm.323072	NM_178635	ENSMUSG00000035354	Uvrag	9530039D02Rik|AI648770|BB124205|Uvrag1|Uvragl	UV radiation resistance associated gene	protein-coding
upeaks-41513	chr7	120767099	120767572	+	0	NA	intron (NM_177697, intron 7 of 33)	intron (NM_177697, intron 7 of 33)	27778	NM_177697	233813	Mm.389939	NM_177697	ENSMUSG00000030889	Vwa3a	E030013G06Rik	von Willebrand factor A domain containing 3A	protein-coding
upeaks-25423	chr2	103597199	103597631	+	0	NA	intron (NM_178890, intron 1 of 16)	intron (NM_178890, intron 1 of 16)	31105	NM_178890	99382	Mm.35850	NM_178890	ENSMUSG00000032724	Abtb2	AW539457|BPOZ-2	ankyrin repeat and BTB (POZ) domain containing 2	protein-coding
upeaks-10353	chr12	86104317	86104779	+	0	NA	intron (NM_001199843, intron 2 of 8)	intron (NM_001199843, intron 2 of 8)	21987	NM_029601	76411	Mm.292345	NM_029601	ENSMUSG00000007867	Ift43	1700019E19Rik|R75064	intraflagellar transport 43	protein-coding
upeaks-38915	chr6	137525851	137526102	+	0	NA	intron (NM_001271595, intron 6 of 20)	ORR1D2|LTR|ERVL-MaLR	-6081	NM_001271589	13860	Mm.235346	NM_007945	ENSMUSG00000015766	Eps8	AW261790	epidermal growth factor receptor pathway substrate 8	protein-coding
upeaks-36954	chr6	38008075	38008275	+	0	NA	intron (NM_177200, intron 14 of 15)	ID_B1|SINE|B4	38821	NM_177200	320590	Mm.197449	NM_177200	ENSMUSG00000029830	Svopl	9430071P14Rik	SV2 related protein homolog (rat)-like	protein-coding
upeaks-10110	chr12	77483048	77483759	+	0	NA	Intergenic	Intergenic	73262	NM_001252616	53618	Mm.35628	NM_016893	ENSMUSG00000021065	Fut8	-	fucosyltransferase 8	protein-coding
upeaks-847	chr1	70529826	70530025	+	0	NA	intron (NM_029160, intron 16 of 16)	intron (NM_029160, intron 16 of 16)	-195790	NM_177164	320460	Mm.360649	NM_177164	ENSMUSG00000045648	Vwc2l	A830006F12Rik|Brl	von Willebrand factor C domain-containing protein 2-like	protein-coding
upeaks-41783	chr7	130299301	130299541	+	0	NA	Intergenic	Intergenic	-32613	NM_201601	14183	Mm.16340	NM_010207	ENSMUSG00000030849	Fgfr2	AU043015|AW556123|Bek|Fgfr-2|Fgfr-7|Fgfr7|KGFR|KGFRTr|svs	fibroblast growth factor receptor 2	protein-coding
upeaks-12743	chr13	93687343	93687601	+	0	NA	intron (NM_028772, intron 3 of 15)	intron (NM_028772, intron 3 of 15)	13036	NM_028772	74129	Mm.21789	NM_028772	ENSMUSG00000042102	Dmgdh	1200014D15Rik|AI787269	dimethylglycine dehydrogenase precursor	protein-coding
upeaks-8601	chr11	107629557	107629761	+	0	NA	intron (NM_198298, intron 16 of 31)	intron (NM_198298, intron 16 of 31)	-8063	NR_105897	102465562		NR_105897	ENSMUSG00000098497	Mir6932	Gm27691|mmu-mir-6932	microRNA 6932	ncRNA
upeaks-36603	chr6	17240115	17240350	+	0	NA	Intergenic	B1_Mm|SINE|Alu	-40953	NM_001277756	12390	Mm.396075	NM_016900	ENSMUSG00000000058	Cav2	AI447843	caveolin 2	protein-coding
upeaks-24970	chr2	75010657	75010879	+	0	NA	Intergenic	Intergenic	184956	NM_016804	53375	Mm.292613	NM_016804	ENSMUSG00000027099	Mtx2	1500012G02Rik	metaxin 2	protein-coding
upeaks-40290	chr7	58843926	58844507	+	0	NA	Intergenic	Intergenic	186014	NM_009728	11982	Mm.135129	NM_009728	ENSMUSG00000025324	Atp10a	Atp10c|pfatp	ATPase, class V, type 10A	protein-coding
upeaks-32344	chr4	125609781	125610009	+	0	NA	intron (NM_001081097, intron 1 of 15)	L1MC1|LINE|L1	105146	NR_109835	735288		NR_109835	ENSMUSG00000094403	Mir692-2	Mir692-2a|Mir692-3|Mirn692-2|Mirn692-2a|mir-692-2|mmu-mir-692-2	microRNA 692-2	ncRNA
upeaks-10408	chr12	88428698	88429129	+	0	NA	intron (NM_028105, intron 4 of 10)	intron (NM_028105, intron 4 of 10)	-51590	NR_045888	71818	Mm.490789	NR_045888		3200001D21Rik	-	RIKEN cDNA 3200001D21 gene	ncRNA
upeaks-30614	chr4	22924201	22924450	+	0	NA	Intergenic	Intergenic	433777	NR_131335	105500046		NR_131335	ENSMUSG00000107859	Gm30731	Pnky|lnc-pou3f2	predicted gene, 30731	ncRNA
upeaks-27011	chr2	165391634	165391855	+	0	NA	Intergenic	Intergenic	-3485	NM_178411	228876	Mm.26316	NM_178411	ENSMUSG00000017667	Zfp334	D2Ertd535e	zinc finger protein 334	protein-coding
upeaks-22662	chr19	21727189	21727533	+	0	NA	Intergenic	Intergenic	-50979	NM_031997	83921	Mm.329776	NM_031997	ENSMUSG00000024754	Tmem2	-	transmembrane protein 2	protein-coding
upeaks-39057	chr6	144264357	144264734	+	0	NA	Intergenic	Intergenic	-54977	NM_001243163	20678	Mm.1752	NM_011444	ENSMUSG00000041540	Sox5	A730017D01Rik|AI528773	SRY (sex determining region Y)-box 5	protein-coding
upeaks-44340	chr8	117322898	117323326	+	0	NA	intron (NM_001163262, intron 1 of 20)	Charlie19a|DNA|hAT-Charlie	-26058	NM_028941	74440	Mm.233181	NM_028941	ENSMUSG00000034390	Cmip	4933407C03Rik|5830471E12Rik|AI314065|AI464126	c-Maf inducing protein	protein-coding
upeaks-5506	chr10	118961592	118962090	+	0	NA	Intergenic	Intergenic	-34698	NR_110482	216377	Mm.208936	NR_110482		Gm38403	C230029M16	predicted gene, 38403	ncRNA
upeaks-22738	chr19	26597071	26597294	+	0	NA	Intergenic	MLTR11A|LTR|ERVK	-7978	NM_011416	67155	Mm.342988	NM_011416	ENSMUSG00000024921	Smarca2	2610209L14Rik|SNF2alpha|Snf2l2|brahma|brm	SWI/SNF related, matrix associated, actin dependent regulator of chromatin, subfamily a, member 2	protein-coding
upeaks-8206	chr11	98005064	98005508	+	0	NA	exon (NM_031173, exon 13 of 13)	exon (NM_031173, exon 13 of 13)	-9113	NM_207231	217151	Mm.277896	NM_207231	ENSMUSG00000038352	Arl5c	Arl12|BC065791	ADP-ribosylation factor-like 5C	protein-coding
upeaks-16523	chr15	85178285	85178517	+	0	NA	Intergenic	LTR31|LTR|ERV1	-22269	NR_040360	100502602	Mm.390830	NR_040360		Gm19277	-	predicted gene, 19277	ncRNA
upeaks-46880	chr9	107425776	107426051	+	0	NA	intron (NM_001174047, intron 1 of 38)	intron (NM_001174047, intron 1 of 38)	-10823	NR_039580	100628590		NR_039580	ENSMUSG00000092761	Mir5120	mmu-mir-5120|mu-mir-5120	microRNA 5120	ncRNA
upeaks-18131	chr16	57858170	57858514	+	0	NA	Intergenic	Intergenic	-103605	NM_007739	12837	Mm.130388	NM_007739	ENSMUSG00000068196	Col8a1	Col8a-1	collagen, type VIII, alpha 1	protein-coding
upeaks-592	chr1	52565829	52566152	+	0	NA	Intergenic	Intergenic	-64715	NR_024590	227094	Mm.83541	NM_172654	ENSMUSG00000043015	Nemp2	5330401P04Rik|9830163O08|Tmem194b	nuclear envelope integral membrane protein 2	protein-coding
upeaks-3294	chr1	194354925	194355174	+	0	NA	Intergenic	Intergenic	-132290	NR_040477	74942	Mm.60689	NR_040477	ENSMUSG00000103692	4930503O07Rik	-	RIKEN cDNA 4930503O07 gene	ncRNA
upeaks-3589	chr10	19192189	19192411	+	0	NA	intron (NR_038021, intron 3 of 3)	intron (NR_038021, intron 3 of 3)	25062	NR_038022	100504265	Mm.383417	NR_038021		Gm20139	-	predicted gene, 20139	ncRNA
upeaks-18166	chr16	60013311	60013555	+	0	NA	intron (NM_007938, intron 6 of 17)	L1_Mus4|LINE|L1	-374024	NM_001347244	56297	Mm.392505	NM_019665	ENSMUSG00000022722	Arl6	1110018H24Rik|2210411E14Rik|BBS3	ADP-ribosylation factor-like 6	protein-coding
upeaks-33560	chr5	7277139	7277383	+	0	NA	intron (NM_001163223, intron 1 of 3)	intron (NM_001163223, intron 1 of 3)	-26903	NM_027603	70920	Mm.158494	NM_027603	ENSMUSG00000040514	4921511H03Rik	-	RIKEN cDNA 4921511H03 gene	protein-coding
upeaks-14558	chr14	72886862	72887412	+	0	NA	Intergenic	L1MD3|LINE|L1	-138466	NR_027860	668489	Mm.158324	NR_027860		Gm9199	EG668489	glycine cleavage system protein H (aminomethyl carrier) pseudogene	pseudo
upeaks-39318	chr7	6799841	6800073	+	0	NA	intron (NM_021323, intron 2 of 7)	RMER10A|LTR|ERVL	-3630	NR_037213	100499513		NR_037213	ENSMUSG00000092815	Mir3099	mir-3099|mmu-mir-3099	microRNA 3099	ncRNA
upeaks-42684	chr8	29789227	29789467	+	0	NA	Intergenic	Intergenic	-569711	NM_153135	210801	Mm.248433	NM_153135	ENSMUSG00000063626	Unc5d	D930029E11Rik|Unc5h4|mKIAA1777	unc-5 netrin receptor D	protein-coding
upeaks-9400	chr12	21899146	21899480	+	0	NA	Intergenic	CpG	257333	NR_136920	100043416		NM_001004167	ENSMUSG00000093846	Gm4425	EG432637|Gm5433	KRAB-domain protein pseudogene	pseudo
upeaks-256	chr1	23899153	23899366	+	0	NA	intron (NM_028534, intron 1 of 9)	RMER16B|LTR|ERVK	10477	NR_110972	98366	Mm.329963	NM_028534	ENSMUSG00000026155	Smap1	1700056O10Rik|4921514B13Rik|4921525H11Rik|AI462175	small ArfGAP 1	protein-coding
upeaks-4281	chr10	61782811	61783092	+	0	NA	intron (NM_207000, intron 1 of 8)	intron (NM_207000, intron 1 of 8)	913	NM_207000	404634	Mm.272870	NM_207000	ENSMUSG00000020086	H2afy2	macroH2A2	H2A histone family, member Y2	protein-coding
upeaks-17766	chr16	34958654	34958975	+	0	NA	promoter-TSS (NR_045722)	promoter-TSS (NR_045722)	50	NR_045722	278725	Mm.436927	NR_045722		E130310I04Rik	A930019C19Rik	RIKEN cDNA E130310I04 gene	ncRNA
upeaks-33650	chr5	17135398	17135921	+	0	NA	Intergenic	Intergenic	-340463	NM_027609	70935	Mm.332225	NM_027609	ENSMUSG00000058643	Speer4f1	4922502J04Rik|SPEER-4F|Speer4f	spermatogenesis associated glutamate (E)-rich protein 4F1	protein-coding
upeaks-36221	chr5	144289865	144290110	+	0	NA	intron (NM_025833, intron 3 of 13)	intron (NM_025833, intron 3 of 13)	12926	NR_040432	100504231	Mm.441035	NR_040432	ENSMUSG00000086894	Gm15708	OTTMUSG00000025583	predicted gene 15708	ncRNA
upeaks-43569	chr8	83427009	83427252	+	0	NA	3' UTR (NM_001329627, exon 15 of 15)	3' UTR (NM_001329627, exon 15 of 15)	15532	NM_019708	56367	Mm.246911	NM_019708	ENSMUSG00000063253	Scoc	0610011C06Rik|2810002J11Rik|AA415030|SCOCO	short coiled-coil protein	protein-coding
upeaks-4009	chr10	44125712	44125911	+	0	NA	Intergenic	PB1|SINE|Alu	-44636	NR_001582	70365	Mm.87073	NR_001582	ENSMUSG00000091358	Speer5-ps1	1700007C10Rik|SPEER-5|Speer5-ps	spermatogenesis associated glutamate (E)-rich protein 5, pseudogene 1	pseudo
upeaks-41291	chr7	112197044	112197243	+	0	NA	Intergenic	Intergenic	-28693	NM_177282	320878	Mm.52312	NM_177282	ENSMUSG00000038244	Mical2	5330438E18Rik|9530064J02|MICAL-2|mKIAA0750	microtubule associated monooxygenase, calponin and LIM domain containing 2	protein-coding
upeaks-21943	chr18	75449776	75450006	+	0	NA	intron (NM_201354, intron 10 of 11)	intron (NM_201354, intron 10 of 11)	-64754	NR_045879	100038353	Mm.440724	NR_045879	ENSMUSG00000097712	Gm10532	ENSMUSG00000073534	predicted gene 10532	ncRNA
upeaks-24684	chr2	60703382	60703582	+	0	NA	intron (NM_001159564, intron 1 of 17)	intron (NM_001159564, intron 1 of 17)	19121	NM_001159564	16420	Mm.98193	NM_021359	ENSMUSG00000026971	Itgb6	2210409C20Rik|4831415H04Rik	integrin beta 6	protein-coding
upeaks-24120	chr2	30842637	30842970	+	0	NA	Intergenic	Intergenic	-2564	NM_009116	20204	Mm.1802	NM_009116	ENSMUSG00000039476	Prrx2	Prx2|S8	paired related homeobox 2	protein-coding
upeaks-16941	chr15	100291661	100292054	+	0	NA	intron (NM_183109, intron 4 of 4)	intron (NM_183109, intron 4 of 4)	11020	NM_183109	75002	Mm.261400	NM_183109	ENSMUSG00000045631	Tmprss12	4930478A21Rik	transmembrane (C-terminal) protease, serine 12	protein-coding
upeaks-10299	chr12	84625263	84625517	+	0	NA	Intergenic	Intergenic	-7924	NM_008992	19300	Mm.229109	NM_008992	ENSMUSG00000021240	Abcd4	P69r|P70R|Pxmp1l	ATP-binding cassette, sub-family D (ALD), member 4	protein-coding
upeaks-30577	chr4	21455471	21455723	+	0	NA	Intergenic	ERVB4_1B-LTR_MM|LTR|ERVK	230366	NM_001080771	230025	Mm.208541	NM_001080771	ENSMUSG00000040478	Prdm13	-	PR domain containing 13	protein-coding
upeaks-21969	chr18	76072586	76072907	+	0	NA	intron (NM_145356, intron 3 of 4)	intron (NM_145356, intron 3 of 4)	25725	NR_045365	73009	Mm.443541	NR_045365		2900057B20Rik	-	RIKEN cDNA 2900057B20 gene	ncRNA
upeaks-9934	chr12	70164413	70164770	+	0	NA	intron (NM_001195033, intron 4 of 12)	intron (NM_001195033, intron 4 of 12)	10420	NM_001195033	100504285	Mm.291105	NM_001195033	ENSMUSG00000090121	Abhd12b	Gm804	abhydrolase domain containing 12B	protein-coding
upeaks-26156	chr2	133430751	133431063	+	0	NA	Intergenic	Intergenic	-121252	NM_007553	12156	Mm.103205	NM_007553	ENSMUSG00000027358	Bmp2	AI467020|Bmp2a	bone morphogenetic protein 2	protein-coding
upeaks-39205	chr6	149182356	149182565	+	0	NA	intron (NM_001113424, intron 3 of 6)	RLTR50B|LTR|ERVK	6252	NM_001113424	232566	Mm.209147	NM_001113424	ENSMUSG00000068250	Amn1	5830467E07Rik|A230083D09|C730024G19Rik	antagonist of mitotic exit network 1	protein-coding
upeaks-10848	chr12	111301422	111301633	+	0	NA	intron (NM_183016, intron 29 of 36)	B4|SINE|B4	30431	NM_033603	93835	Mm.197639	NM_033603	ENSMUSG00000021278	Amn	-	amnionless	protein-coding
upeaks-18145	chr16	58539008	58539349	+	0	NA	Intergenic	Intergenic	-15866	NM_018784	54613	Mm.212742	NM_018784	ENSMUSG00000022747	St3gal6	1700023B24Rik|AI930218|AW552396|Siat10|St3galVI	ST3 beta-galactoside alpha-2,3-sialyltransferase 6	protein-coding
upeaks-4223	chr10	60257355	60257554	+	0	NA	Intergenic	B4A|SINE|B4	-20174	NM_001146121	19156	Mm.29978	NM_011179	ENSMUSG00000004207	Psap	AI037048|SGP-1	prosaposin	protein-coding
upeaks-22246	chr19	3687780	3688271	+	0	NA	Intergenic	Intergenic	-1461	NM_008513	16973	Mm.274581	NM_008513	ENSMUSG00000024913	Lrp5	BMND1|HBM|LR3|LRP7|OPPG|mKIAA4142	low density lipoprotein receptor-related protein 5	protein-coding
upeaks-11949	chr13	49653250	49653451	+	0	NA	promoter-TSS (NM_025495)	promoter-TSS (NM_025495)	272	NR_073167	70930	Mm.258915	NM_001081350	ENSMUSG00000021392	Nol8	4921532D18Rik|5730412B09Rik	nucleolar protein 8	protein-coding
upeaks-8667	chr11	109933268	109933578	+	0	NA	TTS (NM_013851)	TTS (NM_013851)	62393	NM_013851	27404	Mm.341004	NM_013851	ENSMUSG00000020620	Abca8b	Abca8	ATP-binding cassette, sub-family A (ABC1), member 8b	protein-coding
upeaks-26154	chr2	133397572	133397981	+	0	NA	Intergenic	Intergenic	-154383	NM_007553	12156	Mm.103205	NM_007553	ENSMUSG00000027358	Bmp2	AI467020|Bmp2a	bone morphogenetic protein 2	protein-coding
upeaks-15681	chr15	44673018	44673663	+	0	NA	exon (NM_176998, exon 8 of 8)	exon (NM_176998, exon 8 of 8)	33148	NM_001285843	319613	Mm.207715	NM_176998	ENSMUSG00000022340	Sybu	Golsyn	syntabulin (syntaxin-interacting)	protein-coding
upeaks-20387	chr17	78571491	78571999	+	0	NA	intron (NM_028813, intron 4 of 13)	intron (NM_028813, intron 4 of 13)	63682	NM_028813	74199	Mm.292983	NM_028813	ENSMUSG00000024076	Vit	1700052E02Rik|1700110E08Rik|2810429K11Rik	vitrin	protein-coding
upeaks-41806	chr7	130959911	130960409	+	0	NA	intron (NM_019564, intron 1 of 8)	intron (NM_019564, intron 1 of 8)	23957	NM_019564	56213	Mm.30156	NM_019564	ENSMUSG00000006205	Htra1	AI429470|HTRA|L56|Prss11|RSPP11	HtrA serine peptidase 1	protein-coding
upeaks-11321	chr13	19697995	19698194	+	0	NA	promoter-TSS (NM_001167909)	promoter-TSS (NM_001167909)	-334	NM_001167909	73412	Mm.279939	NM_181591	ENSMUSG00000041138	Nme8	1700056P15Rik|Sptrx-2|Txndc3	NME/NM23 family member 8	protein-coding
upeaks-17541	chr16	24850592	24850915	+	0	NA	intron (NM_001145954, intron 4 of 7)	intron (NM_001145954, intron 4 of 7)	128898	NM_001145954	210126	Mm.209385	NM_178665	ENSMUSG00000033306	Lpp	9430020K16Rik|AA959454|AU024130|B130055L10Rik|C79715|D630048H16	LIM domain containing preferred translocation partner in lipoma	protein-coding
upeaks-1027	chr1	76167544	76167753	+	0	NA	Intergenic	Intergenic	-321485	NR_038013	620079	Mm.378379	NR_038012	ENSMUSG00000100553	Gm17751	-	predicted gene, 17751	ncRNA
upeaks-22016	chr18	78300755	78301173	+	0	NA	intron (NM_030683, intron 3 of 11)	intron (NM_030683, intron 3 of 11)	-94524	NM_001110274	27411	Mm.44158	NM_030683	ENSMUSG00000024552	Slc14a2	UT-A1|UT-A3	solute carrier family 14 (urea transporter), member 2	protein-coding
upeaks-5464	chr10	117409477	117409761	+	0	NA	Intergenic	RLTR30D2_MM|LTR|ERV1	-32646	NM_001310609	432508	Mm.478881	NM_001013391	ENSMUSG00000055531	Cpsf6	4733401N12Rik|AI256641|CFIM|CFIM68|HPBRII-4|HPBRII-7	cleavage and polyadenylation specific factor 6	protein-coding
upeaks-4998	chr10	91695561	91695760	+	0	NA	Intergenic	MLT1A1|LTR|ERVL-MaLR	376525	NR_029812	723955		NR_029812	ENSMUSG00000065524	Mir135a-2	Mirn135a-2|mir-135a-2	microRNA 135a-2	ncRNA
upeaks-47714	chrX	68820393	68820735	+	0	NA	Intergenic	L1_Mus3|LINE|L1	58725	NM_001166619	207854	Mm.284945	NM_174993	ENSMUSG00000062170	Fmr1nb	3830422N12Rik|NY-SAR-35|NYSAR35	fragile X mental retardation 1 neighbor	protein-coding
upeaks-30721	chr4	33510538	33510877	+	0	NA	Intergenic	Intergenic	72626	NR_106198	102465904		NR_106198	ENSMUSG00000098310	Mir8118	Gm27954|mmu-mir-8118	microRNA 8118	ncRNA
upeaks-30149	chr3	151927379	151927751	+	0	NA	Intergenic	RMER1C|Other|Other	-90037	NM_008966	19220	Mm.331442	NM_008966	ENSMUSG00000028036	Ptgfr	AI957154|PGF|fp	prostaglandin F receptor	protein-coding
upeaks-6527	chr11	36574076	36574332	+	0	NA	intron (NM_011856, intron 2 of 28)	intron (NM_011856, intron 2 of 28)	370037	NM_001290702	23964	Mm.439889	NM_011856	ENSMUSG00000049336	Tenm2	Odz2|Odz3|Ten-2|Ten-m2	teneurin transmembrane protein 2	protein-coding
upeaks-41332	chr7	112840173	112840372	+	0	NA	intron (NM_009346, intron 3 of 12)	PB1|SINE|Alu	80888	NM_001166585	21676	Mm.24685	NM_009346	ENSMUSG00000055320	Tead1	2610024B07Rik|B230114H05Rik|Gtrgeo5|TEAD-1|TEF-1|Tcf13|mTEF-1	TEA domain family member 1	protein-coding
upeaks-22390	chr19	5944981	5945300	+	0	NA	intron (NM_001164057, intron 13 of 17)	intron (NM_001164057, intron 13 of 17)	19066	NM_001164057	18969	Mm.209931	NM_008893	ENSMUSG00000024833	Pola2	AI573378	polymerase (DNA directed), alpha 2	protein-coding
upeaks-12777	chr13	95330606	95330829	+	0	NA	TTS (NR_034043)	TTS (NR_034043)	106	NR_034043	100217450	Mm.442313	NR_034043	ENSMUSG00000088108	Snora47	MBI-115	small nucleolar RNA, H/ACA box 47	snoRNA
upeaks-40160	chr7	46116041	46116496	+	0	NA	intron (NM_011510, intron 26 of 38)	intron (NM_011510, intron 26 of 38)	-15504	NM_001204411	16514	Mm.333863	NM_010602	ENSMUSG00000096146	Kcnj11	Kir6.2|mBIR	potassium inwardly rectifying channel, subfamily J, member 11	protein-coding
upeaks-2809	chr1	176167771	176168058	+	0	NA	intron (NM_176916, intron 1 of 9)	intron (NM_176916, intron 1 of 9)	46028	NM_001195816	319455	Mm.338001	NM_176916	ENSMUSG00000055214	Pld5	B230365F16Rik	phospholipase D family, member 5	protein-coding
upeaks-18544	chr16	92019572	92019771	+	0	NA	Intergenic	Intergenic	-38651	NM_017391	53881	Mm.217354	NM_017391	ENSMUSG00000089774	Slc5a3	AA623876|BF642829|Smit1	solute carrier family 5 (inositol transporters), member 3	protein-coding
upeaks-14837	chr14	101332477	101332791	+	0	NA	Intergenic	Intergenic	-132565	NM_029680	76627	Mm.31415	NM_029680	ENSMUSG00000042888	Prr30	1700110M21Rik	proline rich 30	protein-coding
upeaks-28559	chr3	84952079	84952414	+	0	NA	promoter-TSS (NM_080428)	promoter-TSS (NM_080428)	35	NM_080428	50754	Mm.196475	NM_080428	ENSMUSG00000028086	Fbxw7	1110001A17Rik|AGO|Cdc4|Fbw7|Fbwd6|Fbx30|Fbxo30|Fbxw6|SEL-10	F-box and WD-40 domain protein 7	protein-coding
upeaks-27671	chr3	18828943	18829173	+	0	NA	Intergenic	RLTR13E|LTR|ERVK	334007	NM_028840	74252	Mm.200383	NM_028840	ENSMUSG00000027599	Armc1	2310016N05Rik|2900046P06Rik|3110009G21Rik|AA409258|AW048872|Arcp|C330014L16Rik	armadillo repeat containing 1	protein-coding
upeaks-47619	chrX	48429665	48429931	+	0	NA	intron (NM_019680, intron 1 of 8)	intron (NM_019680, intron 1 of 8)	33334	NM_019680	56501	Mm.36808	NM_019680	ENSMUSG00000031103	Elf4	AV314029|BC042423|ENSMUSG00000053512|Gm9907|Mef	E74-like factor 4 (ets domain transcription factor)	protein-coding
upeaks-46755	chr9	102650797	102651111	+	0	NA	Intergenic	Intergenic	24658	NM_181394	69010	Mm.2000	NM_181394	ENSMUSG00000035048	Anapc13	1810004D07Rik|APC13|SWM1	anaphase promoting complex subunit 13	protein-coding
upeaks-33059	chr4	144396364	144396619	+	0	NA	intron (NM_029948, intron 1 of 3)	intron (NM_029948, intron 1 of 3)	11973	NM_029948	77632	Mm.31283	NM_029948	ENSMUSG00000028591	Pramef12	4930569K13Rik|AU023001|C86578	PRAME family member 12	protein-coding
upeaks-44431	chr8	120487130	120487497	+	0	NA	Intergenic	Intergenic	-1553	NM_198671	382034	Mm.334856	NM_198671	ENSMUSG00000031822	Gse1	2210013I18Rik|mKIAA0182	genetic suppressor element 1, coiled-coil protein	protein-coding
upeaks-39603	chr7	25181476	25181800	+	0	NA	Intergenic	Intergenic	26569	NR_045848	434147	Mm.59171	NM_001033781	ENSMUSG00000074274	D930028M14Rik	EG434147	RIKEN cDNA D930028M14 gene	ncRNA
upeaks-15811	chr15	57878315	57878523	+	0	NA	intron (NM_024207, intron 5 of 7)	intron (NM_024207, intron 5 of 7)	13999	NM_024207	67819	Mm.289387	NM_024207	ENSMUSG00000022365	Derl1	1110021N07Rik|AI195141|AW551338|Derlin-1	Der1-like domain family, member 1	protein-coding
upeaks-35791	chr5	131807886	131808111	+	0	NA	intron (NM_177047, intron 4 of 18)	intron (NM_177047, intron 4 of 18)	-72271	NR_040704	75369	Mm.389696	NR_040704	ENSMUSG00000105773	4930563F08Rik	-	RIKEN cDNA 4930563F08 gene	ncRNA
upeaks-28712	chr3	89336522	89336721	+	0	NA	intron (NM_007910, intron 1 of 3)	intron (NM_007910, intron 1 of 3)	1407	NM_007910	13639	Mm.16332	NM_007910	ENSMUSG00000028040	Efna4	EFL-4|Epl4|LERK-4	ephrin A4	protein-coding
upeaks-38848	chr6	135148632	135148831	+	0	NA	intron (NM_013546, intron 3 of 3)	intron (NM_013546, intron 3 of 3)	19484	NM_013546	15199	Mm.378937	NM_013546	ENSMUSG00000042770	Hebp1	Hebp|p22HBP	heme binding protein 1	protein-coding
upeaks-12988	chr13	107044195	107044475	+	0	NA	Intergenic	Intergenic	21765	NR_015471	100040322	Mm.133867	NR_015471		3830408C21Rik	-	RIKEN cDNA 3830408C21 gene	ncRNA
upeaks-23552	chr2	6072032	6072300	+	0	NA	Intergenic	Intergenic	58019	NM_144883	227545	Mm.133542	NM_144883	ENSMUSG00000045319	Proser2	5430407P10Rik|AU067770	proline and serine rich 2	protein-coding
upeaks-45116	chr9	24745066	24745276	+	0	NA	intron (NM_020496, intron 6 of 6)	intron (NM_020496, intron 6 of 6)	29132	NM_001205085	57246	Mm.31452	NM_020496	ENSMUSG00000031965	Tbx20	9430010M06Rik|AL022859|Tbx12	T-box 20	protein-coding
upeaks-40246	chr7	51455029	51455462	+	0	NA	Intergenic	Intergenic	-55784	NM_001271879	233246	Mm.254431	NM_177694	ENSMUSG00000055489	Ano5	9330162L24|Gdd1|Tmem16e	anoctamin 5	protein-coding
upeaks-36915	chr6	36451564	36451871	+	0	NA	intron (NM_203491, intron 2 of 2)	intron (NM_203491, intron 2 of 2)	29975	NR_030524	735279		NR_030524	ENSMUSG00000070075	Mir490	Mirn490|mir-490|mmu-mir-490	microRNA 490	ncRNA
upeaks-29357	chr3	114065555	114065771	+	0	NA	intron (NM_007729, intron 3 of 66)	intron (NM_007729, intron 3 of 66)	35123	NM_007729	12814	Mm.209715	NM_007729	ENSMUSG00000027966	Col11a1	C530001D20Rik|cho	collagen, type XI, alpha 1	protein-coding
upeaks-27773	chr3	28681826	28682129	+	0	NA	Intergenic	Intergenic	-15926	NM_031197	20526	Mm.18443	NM_031197	ENSMUSG00000027690	Slc2a2	AI266973|Glut-2|Glut2	solute carrier family 2 (facilitated glucose transporter), member 2	protein-coding
upeaks-3594	chr10	19845891	19846141	+	0	NA	Intergenic	Intergenic	5443	NM_029529	76157	Mm.74324	NM_029529	ENSMUSG00000050473	Slc35d3	6230421J19Rik|Frcl1	solute carrier family 35, member D3	protein-coding
upeaks-37741	chr6	86991113	86991413	+	0	NA	3' UTR (NM_177762, exon 20 of 20)	3' UTR (NM_177762, exon 20 of 20)	-18573	NM_001170591	56748	Mm.23809	NM_020045	ENSMUSG00000029993	Nfu1	0610006G17Rik|CGI-33|Hirip5	NFU1 iron-sulfur cluster scaffold	protein-coding
upeaks-12274	chr13	63941206	63941466	+	0	NA	Intergenic	Intergenic	126002	NM_023507	76251	Mm.186610	NM_023507	ENSMUSG00000021470	Ercc6l2	0610007P08Rik|1700019D06Rik|9330134C04Rik|Rad26l|Sr278	excision repair cross-complementing rodent repair deficiency, complementation group 6 like 2	protein-coding
upeaks-31234	chr4	63892500	63892807	+	0	NA	Intergenic	Intergenic	-31369	NM_009403	21949	Mm.4664	NM_009403	ENSMUSG00000028362	Tnfsf8	CD153|CD30LG|Cd30l|Tnlg3a	tumor necrosis factor (ligand) superfamily, member 8	protein-coding
upeaks-35865	chr5	134695105	134695326	+	0	NA	Intergenic	RMER15|LTR|ERVL	-6625	NM_010717	16885	Mm.15409	NM_010717	ENSMUSG00000029674	Limk1	KIZ-1|LIMK-1|Limk	LIM-domain containing, protein kinase	protein-coding
upeaks-24836	chr2	69531843	69532044	+	0	NA	intron (NM_001081088, intron 9 of 78)	intron (NM_001081088, intron 9 of 78)	54124	NM_001081088	14725	Mm.23847	NM_001081088	ENSMUSG00000027070	Lrp2	AI315343|AW536255|D230004K18Rik|Gp330|Megalin|b2b1625.2Clo	low density lipoprotein receptor-related protein 2	protein-coding
upeaks-13754	chr14	30502438	30502637	+	0	NA	intron (NM_133761, intron 3 of 9)	PB1D11|SINE|Alu	-11381	NM_028981	12289	Mm.9772	NM_028981	ENSMUSG00000015968	Cacna1d	8430418G19Rik|C79217|Cach3|Cacn4|Cacnl1a2|Cav1.3|Cchl1a|Cchl1a2|D-LTCC	calcium channel, voltage-dependent, L type, alpha 1D subunit	protein-coding
upeaks-30409	chr4	8217158	8217357	+	0	NA	intron (NM_007592, intron 3 of 8)	Lx8|LINE|L1	21784	NM_007592	12319	Mm.119320	NM_007592	ENSMUSG00000041261	Car8	AW546993|Ca8|Cals|Cals1|Carp|wdl	carbonic anhydrase 8	protein-coding
upeaks-34784	chr5	92942282	92942771	+	0	NA	exon (NM_001077596, exon 4 of 10)	exon (NM_001077596, exon 4 of 10)	44533	NM_001077596	27428	Mm.46014	NM_015756	ENSMUSG00000029381	Shroom3	AL022960|D5Ertd287e|Shrm|Shrm3	shroom family member 3	protein-coding
upeaks-9408	chr12	23800858	23801118	+	0	NA	Intergenic	CpG	296281	NM_001256489	66808	Mm.379124	NM_001256489	ENSMUSG00000073158	9030624G23Rik	-	RIKEN cDNA 9030624G23 gene	protein-coding
upeaks-25418	chr2	103550375	103550694	+	0	NA	Intergenic	L1_Mus3|LINE|L1	-15776	NM_178890	99382	Mm.35850	NM_178890	ENSMUSG00000032724	Abtb2	AW539457|BPOZ-2	ankyrin repeat and BTB (POZ) domain containing 2	protein-coding
upeaks-40912	chr7	96440200	96440407	+	0	NA	intron (NM_001310760, intron 3 of 32)	intron (NM_001310760, intron 3 of 32)	-98339	NR_046043	670727	Mm.421352	NR_046043	ENSMUSG00000085751	Gm15412	OTTMUSG00000021245	predicted gene 15412	ncRNA
upeaks-22126	chr18	82791017	82791333	+	0	NA	Intergenic	Intergenic	-32136	NR_045389	76961	Mm.396392	NR_045389	ENSMUSG00000101773	2210420H20Rik	-	RIKEN cDNA 2210420H20 gene	ncRNA
upeaks-10058	chr12	75765821	75766038	+	0	NA	Intergenic	Intergenic	-30200	NM_030750	81535	Mm.280199	NM_030750	ENSMUSG00000021054	Sgpp1	AI463453|SPP|SPP1|Spph1	sphingosine-1-phosphate phosphatase 1	protein-coding
upeaks-44193	chr8	110498785	110499011	+	0	NA	intron (NR_105058, intron 2 of 2)	7SLRNA|srpRNA|srpRNA	3458	NR_105058	100861869	Mm.84499	NR_105058		Gm21283	-	predicted gene, 21283	ncRNA
upeaks-12604	chr13	83330851	83331163	+	0	NA	Intergenic	Intergenic	-173027	NM_001347572	17260	Mm.24001	NM_025282	ENSMUSG00000005583	Mef2c	5430401D19Rik|9930028G15Rik|AV011172|Mef2	myocyte enhancer factor 2C	protein-coding
upeaks-14853	chr14	101892104	101892391	+	0	NA	intron (NM_001347628, intron 8 of 26)	intron (NM_001347628, intron 8 of 26)	51624	NM_001347628	380928	Mm.218981	NM_201529	ENSMUSG00000033060	Lmo7	C78582|FBXO20|Gm914|mKIAA0858	LIM domain only 7	protein-coding
upeaks-29359	chr3	114486891	114487103	+	0	NA	Intergenic	ERVB7_3-LTR_MM|LTR|ERVK	-376256	NR_030469	735255		NR_030469	ENSMUSG00000076126	Mir669b	Mirn669b	microRNA 669b	ncRNA
upeaks-24879	chr2	71424636	71424849	+	0	NA	intron (NM_026115, intron 8 of 10)	intron (NM_026115, intron 8 of 10)	10266	NR_039557	100628577		NR_039557	ENSMUSG00000093061	Mir5098	mmu-mir-5098|mu-mir-5098	microRNA 5098	ncRNA
upeaks-18629	chr16	94932053	94932275	+	0	NA	intron (NM_001025584, intron 2 of 4)	intron (NM_001025584, intron 2 of 4)	65532	NM_001025585	16522	Mm.328720	NM_010606	ENSMUSG00000043301	Kcnj6	BIR1|GIRK2|KATP2|KCNJ7|Kir3.2|weaver|wv	potassium inwardly-rectifying channel, subfamily J, member 6	protein-coding
upeaks-24933	chr2	73704009	73704208	+	0	NA	intron (NM_001166603, intron 5 of 11)	PB1|SINE|Alu	-43685	NM_001166604	108699	Mm.257073	NM_029716	ENSMUSG00000056486	Chn1	0610007I19Rik|0710001E19Rik|1700112L09Rik|2900046J01Rik|AI413815|ARHGAP2	chimerin 1	protein-coding
upeaks-31765	chr4	103654548	103654905	+	0	NA	Intergenic	Intergenic	272226	NR_040673	622167	Mm.244115	NR_040673	ENSMUSG00000086136	Gm12718	OTTMUSG00000008109	predicted gene 12718	ncRNA
upeaks-30257	chr3	154893286	154893598	+	0	NA	intron (NM_177066, intron 17 of 24)	intron (NM_177066, intron 17 of 24)	161965	NM_177066	435766	Mm.210428	NM_177066	ENSMUSG00000040086	Tnni3k	Cark|D830019J24Rik	TNNI3 interacting kinase	protein-coding
upeaks-41616	chr7	125801334	125801533	+	0	NA	intron (NM_001081022, intron 8 of 27)	L1MEg|LINE|L1	93557	NM_001081022	233865	Mm.274389	NM_001081022	ENSMUSG00000032743	D430042O09Rik	Kiaa0556	RIKEN cDNA D430042O09 gene	protein-coding
upeaks-30691	chr4	32306266	32306731	+	0	NA	Intergenic	Intergenic	-110937	NM_001109661	12014	Mm.491223	NM_007521	ENSMUSG00000040270	Bach2	E030004N02Rik	BTB and CNC homology, basic leucine zipper transcription factor 2	protein-coding
upeaks-15559	chr15	36640903	36641125	+	0	NA	Intergenic	Intergenic	-32041	NM_008774	18458	Mm.371570	NM_008774	ENSMUSG00000022283	Pabpc1	PABP|Pabp1|PabpI|Pabpl1|ePAB	poly(A) binding protein, cytoplasmic 1	protein-coding
upeaks-6498	chr11	35507860	35508354	+	0	NA	intron (NM_011412, intron 4 of 35)	intron (NM_011412, intron 4 of 35)	-108709	NR_029799	723924		NR_029799	ENSMUSG00000065583	Mir218-2	Mirn218-2|mir-218-2	microRNA 218-2	ncRNA
upeaks-37540	chr6	73014475	73014999	+	0	NA	Intergenic	Intergenic	-55989	NM_001190327	19240	Mm.3532	NM_025284	ENSMUSG00000079523	Tmsb10	Ptmb10|Tb10	thymosin, beta 10	protein-coding
upeaks-6540	chr11	38155781	38156052	+	0	NA	Intergenic	Intergenic	364129	NR_040295	100502917	Mm.61144	NR_040295		Gm12130	OTTMUSG00000005424	predicted gene 12130	ncRNA
upeaks-6244	chr11	22599000	22599313	+	0	NA	Intergenic	Intergenic	86873	NM_153596	103765	Mm.221274	NM_153596	ENSMUSG00000049904	Tmem17	AI503894|AW049890	transmembrane protein 17	protein-coding
upeaks-14706	chr14	79912934	79913312	+	0	NA	Intergenic	Intergenic	-43947	NR_033535	100038734	Mm.387484	NR_033535		Gm10845	ENSMUSG00000075496	predicted gene 10845	ncRNA
upeaks-46281	chr9	77276709	77277048	+	0	NA	intron (NM_027150, intron 1 of 7)	intron (NM_027150, intron 1 of 7)	70992	NM_027150	69642	Mm.35008	NM_027150	ENSMUSG00000032355	Mlip	2310046A06Rik|AI931782|CIP	muscular LMNA-interacting protein	protein-coding
upeaks-19953	chr17	55367114	55367372	+	0	NA	Intergenic	Intergenic	-78139	NM_001347403	240119	Mm.311687	NM_172829	ENSMUSG00000024172	St6gal2	C230064G14Rik|St6galII|mKIAA1877	beta galactoside alpha 2,6 sialyltransferase 2	protein-coding
upeaks-35685	chr5	127271175	127271378	+	0	NA	intron (NR_038128, intron 1 of 3)	intron (NR_038128, intron 1 of 3)	10347	NR_038128	67351	Mm.320172	NR_038127	ENSMUSG00000087104	Tmem132cos	1700085B03Rik	transmembrane protein 132C, opposite strand	ncRNA
upeaks-3622	chr10	21494673	21494910	+	0	NA	Intergenic	Intergenic	-98354	NR_027968	67692	Mm.54306	NM_183266	ENSMUSG00000050844	1700020N01Rik	-	RIKEN cDNA 1700020N01 gene	ncRNA
upeaks-24476	chr2	45307725	45307938	+	0	NA	Intergenic	Lx8|LINE|L1	-194552	NM_015753	24136	Mm.440702	NM_015753	ENSMUSG00000026872	Zeb2	9130203F04Rik|D130016B08Rik|SIP1|Zfhx1b|Zfx1b|Zfxh1b	zinc finger E-box binding homeobox 2	protein-coding
upeaks-9661	chr12	40888471	40888836	+	0	NA	Intergenic	Intergenic	-135437	NM_053122	93757	Mm.363813	NM_053122	ENSMUSG00000056899	Immp2l	AI853880|IMP2	IMP2 inner mitochondrial membrane peptidase-like (S. cerevisiae)	protein-coding
upeaks-33930	chr5	32416757	32417293	+	0	NA	Intergenic	Intergenic	-41945	NM_172707	19046	Mm.241931	NM_172707	ENSMUSG00000014956	Ppp1cb	1200010B19	protein phosphatase 1, catalytic subunit, beta isoform	protein-coding
upeaks-34344	chr5	60458172	60458461	+	0	NA	Intergenic	L1_Mus3|LINE|L1	-472314	NR_040683	71057	Mm.50817	NR_040682	ENSMUSG00000106013	4933402J10Rik	-	RIKEN cDNA 4933402J10 gene	ncRNA
upeaks-15217	chr15	5145334	5145576	+	0	NA	intron (NM_001013367, intron 1 of 8)	intron (NM_001013367, intron 1 of 8)	1594	NM_001013367	105787	Mm.207004	NM_001013367	ENSMUSG00000050697	Prkaa1	AI194361|AI450832|AL024255|AMPKalpha1|C130083N04Rik	protein kinase, AMP-activated, alpha 1 catalytic subunit	protein-coding
upeaks-40407	chr7	67054207	67054461	+	0	NA	intron (NM_001033877, intron 15 of 22)	intron (NM_001033877, intron 15 of 22)	168124	NR_131044	76628	Mm.384589	NR_131043	ENSMUSG00000097527	1700112J16Rik	-	RIKEN cDNA 1700112J16 gene	ncRNA
upeaks-15850	chr15	59154757	59155104	+	0	NA	Intergenic	Intergenic	-72904	NM_001146180	211401	Mm.215481	NM_144800	ENSMUSG00000022353	Mtss1	2310003N14Rik|BC024131|D130001D01Rik|Mim|mKIAA0429	metastasis suppressor 1	protein-coding
upeaks-30408	chr4	8200218	8200465	+	0	NA	intron (NM_007592, intron 3 of 8)	intron (NM_007592, intron 3 of 8)	38700	NM_007592	12319	Mm.119320	NM_007592	ENSMUSG00000041261	Car8	AW546993|Ca8|Cals|Cals1|Carp|wdl	carbonic anhydrase 8	protein-coding
upeaks-30384	chr4	6415453	6415844	+	0	NA	intron (NM_010945, intron 21 of 30)	intron (NM_010945, intron 21 of 30)	38623	NM_010945	18201	Mm.3059	NM_010945	ENSMUSG00000028245	Nsmaf	AA959567|C630007J05|Fan	neutral sphingomyelinase (N-SMase) activation associated factor	protein-coding
upeaks-11115	chr13	5824298	5824721	+	0	NA	Intergenic	Intergenic	33583	NR_045891	71867	Mm.179181	NR_045891	ENSMUSG00000100625	1700016G22Rik	-	RIKEN cDNA 1700016G22 gene	ncRNA
upeaks-41450	chr7	118090153	118090384	+	0	NA	Intergenic	Intergenic	25879	NM_170669	267019	Mm.288212	NM_170669	ENSMUSG00000008683	Rps15a	A630031B11Rik	ribosomal protein S15A	protein-coding
upeaks-35282	chr5	114639342	114639711	+	0	NA	intron (NM_022017, intron 3 of 15)	intron (NM_022017, intron 3 of 15)	18895	NM_022017	63873	Mm.266450	NM_022017	ENSMUSG00000014158	Trpv4	0610033B08Rik|OTRPC4|Trp12|VR-OAC|VRL-2|VROAC	transient receptor potential cation channel, subfamily V, member 4	protein-coding
upeaks-31575	chr4	92921378	92921652	+	0	NA	Intergenic	RLTR1|LTR|ERV1	413996	NM_026954	69136	Mm.171558	NM_026954	ENSMUSG00000054000	Tusc1	2200001D17Rik|TSG-9	tumor suppressor candidate 1	protein-coding
upeaks-23232	chr19	47562630	47562843	+	0	NA	Intergenic	PB1D9|SINE|Alu	-17283	NM_001164639	20874	Mm.281011	NM_009289	ENSMUSG00000025060	Slk	9A2|AV021402|AW411554|Etk4|SMAK|Stk2|mKIAA0204|mSLK	STE20-like kinase	protein-coding
upeaks-29609	chr3	127163791	127163990	+	0	NA	intron (NR_105029, intron 2 of 3)	intron (NR_105029, intron 2 of 3)	2585	NR_105030	100862268	Mm.444603	NR_105029	ENSMUSG00000097456	LOC100862268	-	uncharacterized LOC100862268	ncRNA
upeaks-31086	chr4	57040491	57040731	+	0	NA	Intergenic	Intergenic	-50220	NM_001142965	230235	Mm.207654	NM_001142965	ENSMUSG00000045589	Frrs1l	6430704M03Rik	ferric-chelate reductase 1 like	protein-coding
upeaks-1478	chr1	102404805	102405014	+	0	NA	Intergenic	PB1|SINE|Alu	1249141	NR_037989	100504525	Mm.87065	NR_037989	ENSMUSG00000100684	Gm20268	-	predicted gene, 20268	ncRNA
upeaks-18481	chr16	90387611	90387812	+	0	NA	intron (NM_015755, intron 1 of 10)	intron (NM_015755, intron 1 of 10)	1314	NM_015755	26559	Mm.125874	NM_015755	ENSMUSG00000053414	Hunk	Bstk1|Mak-v	hormonally upregulated Neu-associated kinase	protein-coding
upeaks-38620	chr6	125109509	125109708	+	0	NA	intron (NM_001346610, intron 19 of 38)	intron (NM_001346610, intron 19 of 38)	12584	NR_106012	102466272		NR_106012	ENSMUSG00000098762	Mir7045	Gm27758|mmu-mir-7045	microRNA 7045	ncRNA
upeaks-33054	chr4	143373238	143373482	+	0	NA	Intergenic	Intergenic	-21081	NM_031377	83491	Mm.190607	NM_031377	ENSMUSG00000041805	Pramel1	-	preferentially expressed antigen in melanoma-like 1	protein-coding
upeaks-21810	chr18	68219085	68219294	+	0	NA	intron (NM_172631, intron 3 of 5)	intron (NM_172631, intron 3 of 5)	41784	NR_106078	102465702		NR_106078	ENSMUSG00000098253	Mir7219	Gm27613|mmu-mir-7219	microRNA 7219	ncRNA
upeaks-5289	chr10	108495766	108496087	+	0	NA	Intergenic	Intergenic	163737	NM_054056	114774	Mm.391419	NM_054056	ENSMUSG00000035873	Pawr	2310001G03Rik|PAR4|Par-4	PRKC, apoptosis, WT1, regulator	protein-coding
upeaks-9818	chr12	56519624	56519874	+	0	NA	intron (NR_045082, intron 1 of 6)	intron (NR_045082, intron 1 of 6)	9671	NR_045082	104798	Mm.310950	NR_045082		E030019B13Rik	AI413669	RIKEN cDNA E030019B13 gene	ncRNA
upeaks-41495	chr7	119961326	119961573	+	0	NA	Intergenic	Intergenic	61338	NR_126475	73919	Mm.46381	NM_029610	ENSMUSG00000030922	Lyrm1	1110065L10Rik|2310004B22Rik|4930404J24Rik	LYR motif containing 1	protein-coding
upeaks-38272	chr6	113683945	113684152	+	0	NA	intron (NM_001113553, intron 9 of 11)	PB1|SINE|Alu	-13002	NM_001033463	381801	Mm.333322	NM_001033463	ENSMUSG00000056952	Tatdn2	AI646012|mKIAA0218	TatD DNase domain containing 2	protein-coding
upeaks-11691	chr13	35796413	35796658	+	0	NA	intron (NM_009881, intron 4 of 9)	intron (NM_009881, intron 4 of 9)	55133	NM_001123386	12593	Mm.29002	NM_009881	ENSMUSG00000059288	Cdyl	AI325931	chromodomain protein, Y chromosome-like	protein-coding
upeaks-29657	chr3	128827052	128827401	+	0	NA	Intergenic	Intergenic	-372652	NM_001286942	18741	Mm.246804	NM_011098	ENSMUSG00000028023	Pitx2	9430085M16Rik|Brx1|Brx1b|Munc30|Otlx2|Ptx2|Rieg	paired-like homeodomain transcription factor 2	protein-coding
upeaks-15113	chr14	121137494	121137913	+	0	NA	intron (NM_134082, intron 2 of 26)	intron (NM_134082, intron 2 of 26)	102129	NM_134082	223254	Mm.223980	NM_134082	ENSMUSG00000025555	Farp1	AW228844|BC030329|Cdep	FERM, RhoGEF (Arhgef) and pleckstrin domain protein 1 (chondrocyte-derived)	protein-coding
upeaks-26246	chr2	137288184	137288504	+	0	NA	Intergenic	Intergenic	-171824	NM_013822	16449	Mm.22398	NM_013822	ENSMUSG00000027276	Jag1	ABE2|Gsfabe2|Htu|Ozz|Ser-1	jagged 1	protein-coding
upeaks-47880	chrX	99011380	99011680	+	0	NA	Intergenic	Intergenic	-31051	NM_199018	236920	Mm.236928	NM_199018	ENSMUSG00000031216	Stard8	Dlc3|mKIAA0189	START domain containing 8	protein-coding
upeaks-1566	chr1	114041171	114041383	+	0	NA	Intergenic	Lx|LINE|L1	-1643860	NM_001077425	636808	Mm.101576	NM_001077425	ENSMUSG00000070695	Cntnap5a	Caspr5-1|EG636808	contactin associated protein-like 5A	protein-coding
upeaks-33931	chr5	32446400	32446654	+	0	NA	Intergenic	Intergenic	-12443	NM_172707	19046	Mm.241931	NM_172707	ENSMUSG00000014956	Ppp1cb	1200010B19	protein phosphatase 1, catalytic subunit, beta isoform	protein-coding
upeaks-35004	chr5	105709024	105709428	+	0	NA	intron (NM_178701, intron 1 of 2)	ID4|SINE|ID	8416	NM_178701	231549	Mm.23837	NM_178701	ENSMUSG00000046079	Lrrc8d	2810473G09Rik|4930525N13Rik|A930019F03|Lrrc5	leucine rich repeat containing 8D	protein-coding
upeaks-404	chr1	37262936	37263138	+	0	NA	3' UTR (NM_001282010, exon 8 of 8)	3' UTR (NM_001282010, exon 8 of 8)	-36801	NM_001290797	269180	Mm.5294	NM_030266	ENSMUSG00000026113	Inpp4a	107kDa|9630012D15|D130048C09Rik|R74740	inositol polyphosphate-4-phosphatase, type I	protein-coding
upeaks-3037	chr1	184716244	184716539	+	0	NA	intron (NR_040627, intron 2 of 2)	intron (NR_040627, intron 2 of 2)	3894	NR_040627	74971	Mm.410816	NR_040627	ENSMUSG00000092578	4930488B22Rik	-	RIKEN cDNA 4930488B22 gene	ncRNA
upeaks-3362	chr10	4616416	4616615	+	0	NA	intron (NM_007956, intron 1 of 8)	PB1D11|SINE|Alu	4526	NR_126357	13982	Mm.9213	NM_007956	ENSMUSG00000019768	Esr1	ER|ER-alpha|ERa|ERalpha|ESR|Estr|Estra|Nr3a1	estrogen receptor 1 (alpha)	protein-coding
upeaks-16387	chr15	81769080	81769302	+	0	NA	intron (NM_001081016, intron 4 of 22)	intron (NM_001081016, intron 4 of 22)	24343	NM_001081016	20286	Mm.432075	NM_001081016	ENSMUSG00000022390	Zc3h7b	Gm627|Scrg3|Zc2h7b|mKIAA1031	zinc finger CCCH type containing 7B	protein-coding
upeaks-12647	chr13	89122508	89122845	+	0	NA	intron (NM_010103, intron 4 of 9)	intron (NM_010103, intron 4 of 9)	301204	NM_010103	13612	Mm.125580	NM_010103	ENSMUSG00000034488	Edil3	Del-1|Del1	EGF-like repeats and discoidin I-like domains 3	protein-coding
upeaks-4035	chr10	45146988	45147200	+	0	NA	intron (NM_011156, intron 10 of 14)	intron (NM_011156, intron 10 of 14)	79880	NM_011156	19072	Mm.10281	NM_011156	ENSMUSG00000019849	Prep	AI047692|AI450383|D10Wsu136e|PEP|Pop	prolyl endopeptidase	protein-coding
upeaks-912	chr1	73635671	73636053	+	0	NA	intron (NR_045311, intron 7 of 8)	intron (NR_045311, intron 7 of 8)	219713	NR_105769	102465179		NR_105769	ENSMUSG00000098504	Mir6351	Gm27936|mmu-mir-6351	microRNA 6351	ncRNA
upeaks-29656	chr3	128575439	128576024	+	0	NA	Intergenic	Intergenic	-344126	NR_045704	402774	Mm.209170	NR_045704	ENSMUSG00000105816	D030025E07Rik	-	RIKEN cDNA D030025E07 gene	ncRNA
upeaks-27196	chr2	170253687	170253887	+	0	NA	Intergenic	B1F2|SINE|Alu	-102574	NR_040610	73303	Mm.443297	NR_040610	ENSMUSG00000086999	Bcas1os2	1700040N02Rik	breast carcinoma amplified sequence 1, opposite strand 2	ncRNA
upeaks-17937	chr16	44582151	44582355	+	0	NA	Intergenic	Intergenic	-23383	NM_172506	117606	Mm.41561	NM_172506	ENSMUSG00000022687	Boc	4732455C11|mFLJ00376	biregional cell adhesion molecule-related/down-regulated by oncogenes (Cdon) binding protein	protein-coding
upeaks-7985	chr11	93746490	93746708	+	0	NA	Intergenic	RMER13B|LTR|ERVK	139167	NM_001013375	217109	Mm.379350	NM_001013375	ENSMUSG00000054079	Utp18	6230425C22Rik|6430513M13|Wdr50	UTP18 small subunit processome component	protein-coding
upeaks-31007	chr4	50045608	50045807	+	0	NA	Intergenic	Intergenic	-199938	NM_001276355	242443	Mm.440095	NM_001033351	ENSMUSG00000039579	Grin3a	6430537F04|A830097C19Rik|NMDAR-L|NR3A|mKIAA1973	glutamate receptor ionotropic, NMDA3A	protein-coding
upeaks-31367	chr4	80831969	80832169	+	0	NA	Intergenic	Lx4A|LINE|L1	-2144	NM_031202	22178	Mm.30438	NM_031202	ENSMUSG00000005994	Tyrp1	Oca3|TRP-1|TRP1|Tyrp|b|brown|isa	tyrosinase-related protein 1	protein-coding
upeaks-47205	chr9	118486917	118487132	+	0	NA	TTS (NM_010136)	TTS (NM_010136)	8835	NM_001164789	13813	Mm.200692	NM_010136	ENSMUSG00000032446	Eomes	C77258|TBR-2|Tbr2	eomesodermin	protein-coding
upeaks-28451	chr3	79990443	79990816	+	0	NA	Intergenic	MER5B|DNA|hAT-Charlie	104699	NM_133187	68659	Mm.427274	NM_133187	ENSMUSG00000027955	Fam198b	1110032E23Rik|2210419I08Rik|AV011458|Ened	family with sequence similarity 198, member B	protein-coding
upeaks-35768	chr5	130553898	130554152	+	0	NA	intron (NM_021371, intron 2 of 5)	MTE2a|LTR|ERVL-MaLR	105233	NM_021371	140904	Mm.40875	NM_021371	ENSMUSG00000060371	Caln1	9630012C17Rik|Cabp8|MNCb-0849	calneuron 1	protein-coding
upeaks-8524	chr11	105467407	105467650	+	0	NA	Intergenic	Intergenic	-10793	NM_172568	632687	Mm.121570	NM_172568	ENSMUSG00000078627	2018-03-10	4933417C16Rik|AV039223|OTTMUSG00000002847|Rnf190	membrane-associated ring finger (C3HC4) 10	protein-coding
upeaks-34947	chr5	103177069	103177401	+	0	NA	intron (NM_001318102, intron 2 of 13)	intron (NM_001318102, intron 2 of 13)	34099	NM_001310683	26414	Mm.39253	NM_009158	ENSMUSG00000046709	Mapk10	C230008H04Rik|JNK3|JNK3B1|JNK3B2|SAPK(beta)|Serk2|p493F12|p54bSAPK	mitogen-activated protein kinase 10	protein-coding
upeaks-40495	chr7	71239279	71239727	+	0	NA	Intergenic	Intergenic	-670192	NR_130995	78156	Mm.243818	NR_130995	ENSMUSG00000108669	4930441H08Rik	-	RIKEN cDNA 4930441H08 gene	ncRNA
upeaks-1071	chr1	80160700	80160976	+	0	NA	Intergenic	Intergenic	53106	NM_173425	241128	Mm.145511	NM_173425	ENSMUSG00000043230	Fam124b	A830043J08Rik	family with sequence similarity 124, member B	protein-coding
upeaks-1585	chr1	117150958	117151157	+	0	NA	Intergenic	Lx2B|LINE|L1	1160075	NM_011650	22099	Mm.426637	NM_011650	ENSMUSG00000026374	Tsn	2610034C24Rik|AU040286|C3PO|TB-RBP	translin	protein-coding
upeaks-40197	chr7	48840513	48840913	+	0	NA	intron (NM_001198841, intron 1 of 5)	intron (NM_001198841, intron 1 of 5)	2958	NM_013808	13009	Mm.17235	NM_013808	ENSMUSG00000030470	Csrp3	CRP3|MLP|MMLP	cysteine and glycine-rich protein 3	protein-coding
upeaks-39699	chr7	27862074	27862273	+	0	NA	intron (NM_001024726, intron 1 of 4)	B1_Mus1|SINE|Alu	1588	NM_001024726	545938	Mm.458180	NM_001024726	ENSMUSG00000020420	Zfp607a	4732475C15Rik|Zfp607	zinc finger protein 607A	protein-coding
upeaks-44686	chr8	125413142	125413341	+	0	NA	Intergenic	Intergenic	79469	NM_001081337	244668	Mm.271668	NM_001081337	ENSMUSG00000001995	Sipa1l2	BC058408|mKIAA1389	signal-induced proliferation-associated 1 like 2	protein-coding
upeaks-17619	chr16	30130219	30130418	+	0	NA	Intergenic	Intergenic	64961	NM_008235	15205	Mm.390859	NM_008235	ENSMUSG00000022528	Hes1	Hry|bHLHb39	hairy and enhancer of split 1 (Drosophila)	protein-coding
upeaks-7487	chr11	75795569	75795782	+	0	NA	promoter-TSS (NR_136932)	promoter-TSS (NR_136932)	-134	NR_136932	102641247	Mm.411386	NR_136932		Gm12339	OTTMUSG00000006218	predicted gene 12339	ncRNA
upeaks-43013	chr8	54371059	54371445	+	0	NA	Intergenic	ERVL-E-int|LTR|ERVL	158746	NM_029701	76687	Mm.86437	NM_029701	ENSMUSG00000054408	Spcs3	1810011E08Rik|SPC22/23	signal peptidase complex subunit 3 homolog (S. cerevisiae)	protein-coding
upeaks-34536	chr5	74172219	74172513	+	0	NA	Intergenic	Intergenic	-22960	NM_026878	68939	Mm.293316	NM_026878	ENSMUSG00000049907	Rasl11b	1190017B18Rik	RAS-like, family 11, member B	protein-coding
upeaks-13403	chr14	13969333	13969532	+	0	NA	Intergenic	L1_Mus4|LINE|L1	-8119	NM_001285780	66231	Mm.295875	NM_025435	ENSMUSG00000053453	Thoc7	Nif3l1bp1	THO complex 7	protein-coding
upeaks-34469	chr5	69467558	69467762	+	0	NA	Intergenic	Intergenic	74987	NM_023784	75581	Mm.154776	NM_023784	ENSMUSG00000029158	Yipf7	2310016N21Rik|Yip1b	Yip1 domain family, member 7	protein-coding
upeaks-14747	chr14	87478610	87478908	+	0	NA	intron (NM_172605, intron 6 of 13)	ORR1D1|LTR|ERVL-MaLR	62176	NM_172605	219249	Mm.35168	NM_172605	ENSMUSG00000022019	Tdrd3	4732418C03Rik|6720468N18	tudor domain containing 3	protein-coding
upeaks-48022	chrX	111554023	111554243	+	0	NA	Intergenic	Lx5|LINE|L1	-16174	NM_025949	67071	Mm.37617	NM_025949	ENSMUSG00000025665	Rps6ka6	2610524K04Rik|RSK4|S6K-alpha-6	ribosomal protein S6 kinase polypeptide 6	protein-coding
upeaks-48051	chrX	122831300	122831546	+	0	NA	Intergenic	(CATTC)n|Simple_repeat|Simple_repeat	-272100	NM_028426	73061	Mm.292979	NM_028426	ENSMUSG00000079450	Cldn34c1	3110007F17Rik	claudin 34C1	protein-coding
upeaks-13044	chr13	109385050	109385414	+	0	NA	intron (NM_011056, intron 3 of 16)	intron (NM_011056, intron 3 of 16)	60488	NR_030644	100124489		NR_030644	ENSMUSG00000076946	Mir582	Mirn582|mir-582|mmu-mir-582	microRNA 582	ncRNA
upeaks-10591	chr12	100958067	100958341	+	0	NA	intron (NM_026681, intron 10 of 29)	intron (NM_026681, intron 10 of 29)	-50006	NM_001177673	238377	Mm.32160	NM_175493	ENSMUSG00000047415	Gpr68	BB131428|Ogr1	G protein-coupled receptor 68	protein-coding
upeaks-2827	chr1	177238405	177238620	+	0	NA	intron (NM_011785, intron 1 of 12)	intron (NM_011785, intron 1 of 12)	10255	NM_011785	23797	Mm.235194	NM_011785	ENSMUSG00000019699	Akt3	AI851531|D930002M15Rik|Nmf350	thymoma viral proto-oncogene 3	protein-coding
upeaks-40781	chr7	84754577	84754838	+	0	NA	intron (NR_038175, intron 2 of 4)	RLTR13D1|LTR|ERVK	65067	NR_038175	72495	Mm.382914	NR_038175	ENSMUSG00000085236	2610206C17Rik	-	RIKEN cDNA 2610206C17 gene	ncRNA
upeaks-38991	chr6	141097794	141098058	+	0	NA	Intergenic	B4|SINE|B4	-151343	NM_018779	54611	Mm.103728	NM_018779	ENSMUSG00000041741	Pde3a	A930022O17Rik|C87899	phosphodiesterase 3A, cGMP inhibited	protein-coding
upeaks-44107	chr8	106257094	106257304	+	0	NA	intron (NM_021491, intron 7 of 8)	intron (NM_021491, intron 7 of 8)	-25030	NR_126090	75044	Mm.445896	NR_126090		4930506A18Rik	-	RIKEN cDNA 4930506A18 gene	ncRNA
upeaks-25664	chr2	115879491	115879817	+	0	NA	intron (NM_001346047, intron 10 of 13)	intron (NM_001346047, intron 10 of 13)	184965	NM_001346044	17536	Mm.247566	NM_010825	ENSMUSG00000027210	Meis2	A430109D20Rik|Mrg1|Stra10	Meis homeobox 2	protein-coding
upeaks-4421	chr10	70195109	70195355	+	0	NA	Intergenic	7SLRNA|srpRNA|srpRNA	-9432	NM_001304739	69563	Mm.64672	NM_001304739	ENSMUSG00000019933	Mrln	2310015B20Rik|Mln	myoregulin	protein-coding
upeaks-18349	chr16	78827880	78828079	+	0	NA	Intergenic	Intergenic	-102969	NM_139134	246048	Mm.77895	NM_139134	ENSMUSG00000022860	Chodl	3110074E07Rik|MT75|PRED12	chondrolectin	protein-coding
upeaks-48185	chrX	144986910	144987314	+	0	NA	intron (NM_001033795, intron 2 of 6)	RMER15|LTR|ERVL	-52232	NR_037309	100499526		NR_037309	ENSMUSG00000092917	Mir3472	mmu-mir-3472	microRNA 3472	ncRNA
upeaks-3916	chr10	40442254	40442616	+	0	NA	intron (NM_001291817, intron 4 of 11)	intron (NM_001291817, intron 4 of 11)	93127	NM_198164	78334	Mm.200924	NM_198164	ENSMUSG00000038481	Cdk19	2700084L06Rik|AI845279|AW228747|CDK11|Cdc2l6|mKIAA1028	cyclin-dependent kinase 19	protein-coding
upeaks-11539	chr13	28942239	28942581	+	0	NA	Intergenic	Intergenic	11272	NM_009238	20677	Mm.240627	NM_009238	ENSMUSG00000076431	Sox4	AA682046|Sox-4	SRY (sex determining region Y)-box 4	protein-coding
upeaks-9615	chr12	36332781	36333043	+	0	NA	Intergenic	LTR33|LTR|ERVL	18743	NM_025312	66042	Mm.43375	NM_025312	ENSMUSG00000036169	Sostdc1	0610006G05Rik|Sostl|USAG-1|Wise|ectodin	sclerostin domain containing 1	protein-coding
upeaks-34802	chr5	93290281	93290644	+	0	NA	Intergenic	Intergenic	22889	NM_007635	12452	Mm.3527	NM_007635	ENSMUSG00000029385	Ccng2	-	cyclin G2	protein-coding
upeaks-33644	chr5	16525122	16525336	+	0	NA	Intergenic	Intergenic	-28266	NM_001289460	15234	Mm.267078	NM_010427	ENSMUSG00000028864	Hgf	C230052L06Rik|HGF/SF|NK1|NK2|SF|SF/HGF	hepatocyte growth factor	protein-coding
upeaks-10509	chr12	98060820	98061274	+	0	NA	Intergenic	L1_Mur3|LINE|L1	198412	NM_008079	14420	Mm.5120	NM_008079	ENSMUSG00000021003	Galc	2310068B06Rik|A930008M05Rik|AW212969|AW413532|Gacy|twi|twitcher	galactosylceramidase	protein-coding
upeaks-26846	chr2	159069226	159069458	+	0	NA	Intergenic	Intergenic	274535	NM_145742	71715	Mm.315652	NM_145742	ENSMUSG00000027655	Dhx35	1200009D07Rik|Ddx35	DEAH (Asp-Glu-Ala-His) box polypeptide 35	protein-coding
upeaks-25058	chr2	79647099	79647409	+	0	NA	intron (NM_080558, intron 8 of 17)	intron (NM_080558, intron 8 of 17)	11829	NM_080558	70599	Mm.272881	NM_080558	ENSMUSG00000027007	Ssfa2	5730488C15Rik|CS-1|CS1|KRAP|SPAG13|mKIAA1927	sperm specific antigen 2	protein-coding
upeaks-12216	chr13	60336311	60336510	+	0	NA	Intergenic	Intergenic	130939	NR_036449	100503759	Mm.38101	NM_177810		Gm5084	A030007L22|EG328264	predicted gene 5084	ncRNA
upeaks-16007	chr15	68898242	68898478	+	0	NA	Intergenic	Intergenic	-30060	NM_010158	13992	Mm.17964	NM_010158	ENSMUSG00000022332	Khdrbs3	Etle|SLM-2|Salp|Slm2|T-STAR	KH domain containing, RNA binding, signal transduction associated 3	protein-coding
upeaks-18656	chr16	96135818	96136017	+	0	NA	Intergenic	ORR1A3|LTR|ERVL-MaLR	-8192	NM_008251	15312	Mm.2756	NM_008251	ENSMUSG00000040681	Hmgn1	HMG-14|Hmg14	high mobility group nucleosomal binding domain 1	protein-coding
upeaks-30231	chr3	154252334	154252544	+	0	NA	intron (NM_001081263, intron 11 of 21)	intron (NM_001081263, intron 11 of 21)	78121	NM_010713	16875	Mm.15530	NM_010713	ENSMUSG00000096225	Lhx8	L3|Lhx7	LIM homeobox protein 8	protein-coding
upeaks-6692	chr11	48887512	48887960	+	0	NA	3' UTR (NM_001024230, exon 5 of 5)	3' UTR (NM_001024230, exon 5 of 5)	14416	NM_001024230	432555	Mm.338931	NM_001024230	ENSMUSG00000058163	Gm5431	EG432555|Irgb9b8	predicted gene 5431	protein-coding
upeaks-15349	chr15	13049749	13049967	+	0	NA	intron (NM_007666, intron 7 of 11)	L2|LINE|L2	123817	NM_007666	12563	Mm.57048	NM_007666	ENSMUSG00000039385	Cdh6	cad6	cadherin 6	protein-coding
upeaks-7947	chr11	90130740	90130981	+	0	NA	Intergenic	Intergenic	100512	NM_026433	67888	Mm.212428	NM_026433	ENSMUSG00000069763	Tmem100	1810057C19Rik|AV011897	transmembrane protein 100	protein-coding
upeaks-12659	chr13	89570546	89570745	+	0	NA	intron (NM_013500, intron 1 of 4)	Lx9|LINE|L1	30009	NM_013500	12950	Mm.266790	NM_013500	ENSMUSG00000021613	Hapln1	BB099155|CLP|Crtl1|Crtl1l|LP|LP-1	hyaluronan and proteoglycan link protein 1	protein-coding
upeaks-44	chr1	6558929	6559204	+	0	NA	intron (NM_001244693, intron 2 of 22)	ERVB4_1B-LTR_MM|LTR|ERVK	71835	NM_001244692	240690	Mm.234612	NM_173868	ENSMUSG00000033740	St18	AV348974|Myt3|NZF-3|Nzf3|mKIAA0535	suppression of tumorigenicity 18	protein-coding
upeaks-33527	chr5	4326359	4326647	+	0	NA	Intergenic	Intergenic	134136	NM_001042670	208595	Mm.129815	NM_001042670	ENSMUSG00000053178	Mterf1b	ENSMUSG00000053178|Gm9897	mitochondrial transcription termination factor 1b	protein-coding
upeaks-9396	chr12	21478293	21478514	+	0	NA	Intergenic	B1_Mm|SINE|Alu	-60967	NM_011739	22630	Mm.289630	NM_011739	ENSMUSG00000076432	Ywhaq	2700028P07Rik|AA409740|AU021156|R74690	tyrosine 3-monooxygenase/tryptophan 5-monooxygenase activation protein, theta polypeptide	protein-coding
upeaks-31312	chr4	71485186	71485683	+	0	NA	Intergenic	Intergenic	715459	NM_001285531	21885	Mm.278444	NM_011599	ENSMUSG00000008305	Tle1	C230057C06Rik|Estm14|Grg-1|Grg1|Tle4l	transducin-like enhancer of split 1	protein-coding
upeaks-46812	chr9	104630643	104630998	+	0	NA	intron (NM_028719, intron 1 of 15)	intron (NM_028719, intron 1 of 15)	61032	NM_028719	74020	Mm.326240	NM_028719	ENSMUSG00000032564	Cpne4	3632411M23Rik|4933406O10Rik	copine IV	protein-coding
upeaks-37786	chr6	88228056	88228255	+	0	NA	Intergenic	PB1|SINE|Alu	5887	NM_019964	56691	Mm.272871	NM_019964	ENSMUSG00000048206	Dnajb8	1700016F14Rik|1700031F10Rik|AI326313|mDj6	DnaJ heat shock protein family (Hsp40) member B8	protein-coding
upeaks-29327	chr3	109378756	109378955	+	0	NA	intron (NM_020505, intron 1 of 26)	intron (NM_020505, intron 1 of 26)	38172	NM_020505	57257	Mm.282257	NM_020505	ENSMUSG00000033721	Vav3	A530094I06Rik|AA986410|Idd18.1	vav 3 oncogene	protein-coding
upeaks-2270	chr1	155053317	155053530	+	0	NA	Intergenic	Intergenic	46213	NM_010500	15939	Mm.12246	NM_010500	ENSMUSG00000056708	Ier5	-	immediate early response 5	protein-coding
upeaks-13750	chr14	30439699	30439898	+	0	NA	intron (NM_028981, intron 1 of 46)	L1M2|LINE|L1	-18238	NR_131095	77710	Mm.410773	NR_131095		4831407H17Rik	-	RIKEN cDNA 4831407H17 gene	ncRNA
upeaks-26872	chr2	160597954	160598153	+	0	NA	Intergenic	Intergenic	-47844	NM_009408	21969	Mm.217233	NM_009408	ENSMUSG00000070544	Top1	AI467334|D130064I21Rik|Top-1	topoisomerase (DNA) I	protein-coding
upeaks-29958	chr3	143570268	143570522	+	0	NA	Intergenic	Intergenic	141748	NR_040405	621809	Mm.360134	NR_040405	ENSMUSG00000105279	Gm6260	EG621809	predicted gene 6260	ncRNA
upeaks-11758	chr13	39423782	39424011	+	0	NA	Intergenic	PB1|SINE|Alu	-463021	NM_001170431	108652	Mm.255506	NM_134060	ENSMUSG00000021432	Slc35b3	4921526O06Rik|AI428480|CGI-19|PABST2|PAPST2	solute carrier family 35, member B3	protein-coding
upeaks-18578	chr16	92996805	92997205	+	0	NA	Intergenic	Intergenic	-170931	NM_001111021	12394	Mm.4081	NM_009821	ENSMUSG00000022952	Runx1	AML1|CBF-alpha-2|Cbfa2|Pebp2a2|Pebpa2b	runt related transcription factor 1	protein-coding
upeaks-3709	chr10	26391051	26391362	+	0	NA	Intergenic	MLT1E1A|LTR|ERVL-MaLR	-15987	NM_172787	237339	Mm.338439	NM_172787	ENSMUSG00000039089	L3mbtl3	AI481284|MBT-1	l(3)mbt-like 3 (Drosophila)	protein-coding
upeaks-35785	chr5	131636942	131637172	+	0	NA	intron (NM_177047, intron 5 of 18)	intron (NM_177047, intron 5 of 18)	-243212	NR_040704	75369	Mm.389696	NR_040704	ENSMUSG00000105773	4930563F08Rik	-	RIKEN cDNA 4930563F08 gene	ncRNA
upeaks-37788	chr6	88262265	88262497	+	0	NA	intron (NM_023060, intron 6 of 6)	intron (NM_023060, intron 6 of 6)	40113	NM_019964	56691	Mm.272871	NM_019964	ENSMUSG00000048206	Dnajb8	1700016F14Rik|1700031F10Rik|AI326313|mDj6	DnaJ heat shock protein family (Hsp40) member B8	protein-coding
upeaks-86	chr1	10603450	10603684	+	0	NA	intron (NM_177834, intron 1 of 10)	ERVB7_4-LTR_MM|LTR|ERVK	116378	NM_177834	329093	Mm.336423	NM_177834	ENSMUSG00000042501	Cpa6	9030616D13Rik	carboxypeptidase A6	protein-coding
upeaks-17991	chr16	48613795	48614071	+	0	NA	intron (NM_010816, intron 21 of 26)	B1_Mur1|SINE|Alu	158023	NM_198297	77647	Mm.167298	NM_198297	ENSMUSG00000030775	Trat1	C030046M14Rik|Tcrim|Trim	T cell receptor associated transmembrane adaptor 1	protein-coding
upeaks-44778	chr8	128316408	128316619	+	0	NA	Intergenic	Intergenic	-38288	NR_105822	102465212		NR_105822	ENSMUSG00000099326	Mir21c	Gm28013|mmu-mir-21c	microRNA 21c	ncRNA
upeaks-26974	chr2	164754913	164755148	+	0	NA	intron (NM_133763, intron 4 of 12)	intron (NM_133763, intron 4 of 12)	9015	NM_133763	76233	Mm.440009	NM_133763	ENSMUSG00000017299	Dnttip1	6430706C13Rik	deoxynucleotidyltransferase, terminal, interacting protein 1	protein-coding
upeaks-17181	chr16	5473463	5473930	+	0	NA	Intergenic	Intergenic	-217740	NM_027446	70511	Mm.45780	NM_027446	ENSMUSG00000022544	Eef2kmt	5730409G15Rik|Fam86|Fam86a|eEF2-KMT	eukaryotic elongation factor 2 lysine methyltransferase	protein-coding
upeaks-23137	chr19	45627076	45627275	+	0	NA	intron (NM_013907, intron 5 of 8)	intron (NM_013907, intron 5 of 8)	33018	NM_013907	30838	Mm.254739	NM_013907	ENSMUSG00000040913	Fbxw4	Dac|Fbw4|SHFM3|SHSF3|dactylin|dactylyn	F-box and WD-40 domain protein 4	protein-coding
upeaks-26166	chr2	133855029	133855399	+	0	NA	Intergenic	Intergenic	290506	NR_037273	100526500		NR_037273	ENSMUSG00000093338	Mir3090	mmu-mir-3090	microRNA 3090	ncRNA
upeaks-30521	chr4	13775475	13775732	+	0	NA	intron (NM_001111027, intron 2 of 11)	intron (NM_001111027, intron 2 of 11)	-9179	NM_009822	12395	Mm.4909	NM_009822	ENSMUSG00000006586	Runx1t1	Cbfa2t1h|ETO|MTG8	runt-related transcription factor 1; translocated to, 1 (cyclin D-related)	protein-coding
upeaks-18252	chr16	72804282	72804488	+	0	NA	intron (NM_019413, intron 2 of 28)	L1_Mur2|LINE|L1	141236	NM_019413	19876	Mm.310772	NM_019413	ENSMUSG00000022883	Robo1	AW494633|AW742721|DUTT1|Gm310	roundabout guidance receptor 1	protein-coding
upeaks-10048	chr12	75275829	75276028	+	0	NA	Intergenic	Intergenic	-32385	NM_023275	80837	Mm.27467	NM_023275	ENSMUSG00000046768	Rhoj	1110005O19Rik|AW210585|Arhj|TC10L|TCL	ras homolog family member J	protein-coding
upeaks-23873	chr2	25196606	25197007	+	0	NA	promoter-TSS (NM_146115)	promoter-TSS (NM_146115)	7	NM_146115	227612	Mm.119747	NM_146115	ENSMUSG00000059555	Tor4a	A830007P12Rik	torsin family 4, member A	protein-coding
upeaks-38224	chr6	111974896	111975113	+	0	NA	Intergenic	Intergenic	-235704	NR_027865	67336	Mm.378014	NR_027865	ENSMUSG00000100219	1700054K19Rik	-	RIKEN cDNA 1700054K19 gene	ncRNA
upeaks-6762	chr11	51486023	51486366	+	0	NA	intron (NM_153393, intron 2 of 28)	intron (NM_153393, intron 2 of 28)	-98563	NM_028398	72947	Mm.256875	NM_028398	ENSMUSG00000020359	Phykpl	2900006B13Rik|Agxt2l2	5-phosphohydroxy-L-lysine phospholyase	protein-coding
upeaks-11106	chr13	5546940	5547181	+	0	NA	Intergenic	Intergenic	311032	NR_045891	71867	Mm.179181	NR_045891	ENSMUSG00000100625	1700016G22Rik	-	RIKEN cDNA 1700016G22 gene	ncRNA
upeaks-31961	chr4	111897774	111898044	+	0	NA	intron (NM_145551, intron 2 of 14)	intron (NM_145551, intron 2 of 14)	4887	NM_145551	230612	Mm.26630	NM_145551	ENSMUSG00000028544	Slc5a9	AI159731|SGLT4	solute carrier family 5 (sodium/glucose cotransporter), member 9	protein-coding
upeaks-41784	chr7	130362780	130362999	+	0	NA	Intergenic	L1_Mus3|LINE|L1	-96081	NM_201601	14183	Mm.16340	NM_010207	ENSMUSG00000030849	Fgfr2	AU043015|AW556123|Bek|Fgfr-2|Fgfr-7|Fgfr7|KGFR|KGFRTr|svs	fibroblast growth factor receptor 2	protein-coding
upeaks-17999	chr16	49420598	49421030	+	0	NA	Intergenic	Lx2|LINE|L1	-278480	NM_028680	73916	Mm.241276	NM_028680	ENSMUSG00000032965	Ift57	4833420A15Rik|Esrrbl1|Hippi|MHS4R2	intraflagellar transport 57	protein-coding
upeaks-441	chr1	39367587	39368075	+	0	NA	promoter-TSS (NM_053257)	promoter-TSS (NM_053257)	-20	NM_001252218	114641	Mm.379302	NM_053257	ENSMUSG00000073702	Rpl31	Dts	ribosomal protein L31	protein-coding
upeaks-18830	chr17	8434002	8434234	+	0	NA	promoter-TSS (NM_009309)	promoter-TSS (NM_009309)	-305	NM_009309	20997	Mm.913	NM_009309	ENSMUSG00000062327	T	Bra|D17Mit170|Low|Lr|T1|Tl2|Tl3|cou|me75	brachyury	protein-coding
upeaks-5866	chr11	3446628	3446827	+	0	NA	intron (NM_145355, intron 1 of 7)	PB1|SINE|Alu	-5710	NR_028317	71523	Mm.72795	NM_027820	ENSMUSG00000034587	8430429K09Rik	-	RIKEN cDNA 8430429K09 gene	ncRNA
upeaks-43399	chr8	72654961	72655240	+	0	NA	intron (NM_176940, intron 2 of 18)	intron (NM_176940, intron 2 of 18)	8389	NM_176940	319555	Mm.212927	NM_176940	ENSMUSG00000048148	Nwd1	A230063L24Rik	NACHT and WD repeat domain containing 1	protein-coding
upeaks-36253	chr5	146281408	146281648	+	0	NA	intron (NM_153599, intron 4 of 12)	B4A|SINE|B4	49853	NM_153599	264064	Mm.260576	NM_153599	ENSMUSG00000029635	Cdk8	-	cyclin-dependent kinase 8	protein-coding
upeaks-45732	chr9	56260382	56260726	+	0	NA	exon (NM_172924, exon 4 of 7)	exon (NM_172924, exon 4 of 7)	-99484	NM_019793	56434	Mm.28484	NM_019793	ENSMUSG00000032324	Tspan3	1700055K04Rik|TM4-A|Tm4sf8	tetraspanin 3	protein-coding
upeaks-39945	chr7	38048714	38048914	+	0	NA	Intergenic	PB1|SINE|Alu	-29262	NM_011274	19777	Mm.387220	NM_011274	ENSMUSG00000030421	Uri1	C80913|NNX3|Rmp	URI1, prefoldin-like chaperone	protein-coding
upeaks-25646	chr2	115380109	115380494	+	0	NA	Intergenic	Intergenic	-36021	NR_040516	78193	Mm.189508	NR_040516	ENSMUSG00000087309	4930528P14Rik	-	RIKEN cDNA 4930528P14 gene	ncRNA
upeaks-38388	chr6	117327411	117327742	+	0	NA	Intergenic	Intergenic	159041	NM_021704	20315	Mm.303231	NM_013655	ENSMUSG00000061353	Cxcl12	Pbsf|Scyb12|Sdf1|Tlsf|Tpar1	chemokine (C-X-C motif) ligand 12	protein-coding
upeaks-29621	chr3	127464152	127464376	+	0	NA	intron (NM_001327938, intron 1 of 47)	intron (NM_001327938, intron 1 of 47)	34851	NM_001327938	109676	Mm.220242	NM_178655	ENSMUSG00000032826	Ank2	100043364|AI835472|AW491075|Ank-2|Gm4392	ankyrin 2, brain	protein-coding
upeaks-16683	chr15	92524826	92525253	+	0	NA	intron (NM_001164593, intron 3 of 9)	intron (NM_001164593, intron 3 of 9)	-72070	NM_001164594	239618	Mm.309826	NM_001164593	ENSMUSG00000036218	Pdzrn4	1110017D07Rik|LNX4|SAMCAP3L|mKIAA3027	PDZ domain containing RING finger 4	protein-coding
upeaks-3611	chr10	20794093	20794323	+	0	NA	Intergenic	Intergenic	-69130	NM_013875	29863	Mm.425617	NM_013875	ENSMUSG00000019990	Pde7b	-	phosphodiesterase 7B	protein-coding
upeaks-9548	chr12	32761127	32761340	+	0	NA	Intergenic	Intergenic	-59102	NM_021524	59027	Mm.202727	NM_021524	ENSMUSG00000020572	Nampt	1110035O14Rik|AI314458|AI480535|NAmPRTase|Pbef|Pbef1|Visfatin	nicotinamide phosphoribosyltransferase	protein-coding
upeaks-26295	chr2	139924997	139925344	+	0	NA	intron (NR_110350, intron 9 of 12)	intron (NR_110350, intron 9 of 12)	141635	NR_110350	75812	Mm.293449	NM_175225	ENSMUSG00000039033	Tasp1	4930485D02Rik|AW986064	taspase, threonine aspartase 1	protein-coding
upeaks-18024	chr16	50414518	50414730	+	0	NA	intron (NM_001347240, intron 2 of 16)	(GAATG)n|Simple_repeat|Simple_repeat	17765	NM_027444	70508	Mm.28940	NM_027444	ENSMUSG00000022641	Bbx	5530401J07Rik|5730403O13Rik	bobby sox HMG box containing	protein-coding
upeaks-25992	chr2	127858109	127858338	+	0	NA	intron (NM_028765, intron 1 of 17)	MLT1A1|LTR|ERVL-MaLR	3595	NM_028765	74121	Mm.244835	NM_028765	ENSMUSG00000027380	Acoxl	1200014P05Rik|AV025673	acyl-Coenzyme A oxidase-like	protein-coding
upeaks-3749	chr10	29398495	29398771	+	0	NA	Intergenic	RLTR34C_MM|LTR|ERVK	-36191	NM_001110197	68031	Mm.28930	NM_026518	ENSMUSG00000038876	Rnf146	2610509H23Rik|Iduna	ring finger protein 146	protein-coding
upeaks-25452	chr2	104467095	104467598	+	0	NA	intron (NM_010434, intron 2 of 15)	intron (NM_010434, intron 2 of 15)	27143	NM_001145824	15259	Mm.257925	NM_010434	ENSMUSG00000027177	Hipk3	DYRK6|FIST3|PKY|mir-1902	homeodomain interacting protein kinase 3	protein-coding
upeaks-905	chr1	73221938	73222374	+	0	NA	Intergenic	Intergenic	-176812	NR_040605	78718	Mm.244075	NR_040605	ENSMUSG00000101812	D530049I02Rik	-	RIKEN cDNA D530049I02 gene	ncRNA
upeaks-15362	chr15	13558087	13558359	+	0	NA	Intergenic	L1_Mus3|LINE|L1	-384548	NM_007666	12563	Mm.57048	NM_007666	ENSMUSG00000039385	Cdh6	cad6	cadherin 6	protein-coding
upeaks-39787	chr7	29461459	29461924	+	0	NA	intron (NM_001081028, intron 2 of 22)	intron (NM_001081028, intron 2 of 22)	43769	NM_001081028	74206	Mm.447042	NM_001081028	ENSMUSG00000030583	Sipa1l3	2610511M17Rik	signal-induced proliferation-associated 1 like 3	protein-coding
upeaks-47599	chrX	42139945	42140156	+	0	NA	Intergenic	Intergenic	-9362	NM_001077712	20843	Mm.290422	NM_021465	ENSMUSG00000025862	Stag2	9230105L23Rik|B230112I07Rik|SA-2|SAP2	stromal antigen 2	protein-coding
upeaks-27718	chr3	23409470	23409775	+	0	NA	Intergenic	Intergenic	1158252	NR_004439	19784		NR_004439		Rprl2	RPRH3|Rmrp3	ribonuclease P RNA-like 2	ncRNA
upeaks-27611	chr3	11328541	11328996	+	0	NA	Intergenic	RMER13B|LTR|ERVK	515591	NR_040751	100038545	Mm.388494	NR_040751	ENSMUSG00000104015	Gm10745	ENSMUSG00000074696	predicted gene 10745	ncRNA
upeaks-14652	chr14	77473879	77474155	+	0	NA	intron (NM_001253759, intron 5 of 19)	intron (NM_001253759, intron 5 of 19)	32851	NR_033141	629678	Mm.390721	NM_001037935	ENSMUSG00000067973	Gm6994	EG629678	predicted gene 6994	ncRNA
upeaks-14704	chr14	79898258	79898607	+	0	NA	Intergenic	Intergenic	-29256	NR_033535	100038734	Mm.387484	NR_033535		Gm10845	ENSMUSG00000075496	predicted gene 10845	ncRNA
upeaks-7949	chr11	90218468	90218727	+	0	NA	Intergenic	Intergenic	-30879	NM_026178	67468	Mm.277518	NM_026178	ENSMUSG00000003948	Mmd	1200017E07Rik|1810073C06Rik|AA690185	monocyte to macrophage differentiation-associated	protein-coding
upeaks-31678	chr4	98726648	98726917	+	0	NA	promoter-TSS (NM_001081202)	promoter-TSS (NM_001081202)	28	NM_001081202	381591	Mm.34340	NM_001081202	ENSMUSG00000087166	L1td1	AA546746|AB211064|D76865|ECAT11	LINE-1 type transposase domain containing 1	protein-coding
upeaks-33822	chr5	27453478	27453704	+	0	NA	intron (NM_010075, intron 4 of 25)	ORR1E|LTR|ERVL-MaLR	47801	NM_028561	73526	Mm.389608	NM_028561	ENSMUSG00000048703	Speer4b	1700081O22Rik|SPEER-4B	spermatogenesis associated glutamate (E)-rich protein 4B	protein-coding
upeaks-12629	chr13	84569553	84569796	+	0	NA	Intergenic	Intergenic	347378	NM_175187	72745	Mm.295063	NM_175187	ENSMUSG00000035762	Tmem161b	2810446P07Rik|AI843389	transmembrane protein 161B	protein-coding
upeaks-28821	chr3	94373648	94373887	+	0	NA	intron (NM_011281, intron 1 of 10)	intron (NM_011281, intron 1 of 10)	973	NM_011281	19885	Mm.4372	NM_011281	ENSMUSG00000028150	Rorc	Nr1f3|RORgamma|TOR|Thor	RAR-related orphan receptor gamma	protein-coding
upeaks-43200	chr8	68207184	68207521	+	0	NA	Intergenic	Intergenic	-69176	NM_028182	72281	Mm.40974	NM_028182	ENSMUSG00000053886	Sh2d4a	2210402M20Rik|SH2A	SH2 domain containing 4A	protein-coding
upeaks-14273	chr14	59614223	59614459	+	0	NA	Intergenic	PB1|SINE|Alu	-10940	NM_145463	219134	Mm.275409	NM_145463	ENSMUSG00000044461	Shisa2	9430059P22Rik|MAd2|Tmem46|mShisa|shisa	shisa family member 2	protein-coding
upeaks-2618	chr1	169160968	169161203	+	0	NA	Intergenic	Intergenic	370379	NM_023284	66977	Mm.151315	NM_023284	ENSMUSG00000026683	Nuf2	2410003C07Rik|AU044112|C85691|Cdca1|NUF2R	NUF2, NDC80 kinetochore complex component	protein-coding
upeaks-44735	chr8	126610726	126611127	+	0	NA	Intergenic	Intergenic	-17490	NM_001164598	270110	Mm.334918	NM_001164598	ENSMUSG00000051495	Irf2bp2	E130305N23Rik|IRF-2BP2	interferon regulatory factor 2 binding protein 2	protein-coding
upeaks-7813	chr11	86731148	86731782	+	0	NA	intron (NM_001003908, intron 4 of 31)	intron (NM_001003908, intron 4 of 31)	26027	NM_001003908	67300	Mm.254588	NM_001003908	ENSMUSG00000047126	Cltc	3110065L21Rik|CHC|R74732	clathrin, heavy polypeptide (Hc)	protein-coding
upeaks-45566	chr9	47384562	47384802	+	0	NA	Intergenic	Intergenic	-145488	NM_001310841	54725	Mm.234832	NM_018770	ENSMUSG00000032076	Cadm1	2900073G06Rik|3100001I08Rik|AI987920|Bl2|Igsf4|Igsf4a|Necl2|RA175|RA175A|RA175B|RA175C|RA175N|ST17|SgIGSF|SynCam|Tslc1	cell adhesion molecule 1	protein-coding
upeaks-45800	chr9	58061411	58061612	+	0	NA	intron (NM_001166282, intron 10 of 19)	intron (NM_001166282, intron 10 of 19)	29237	NM_001243265	330951	Mm.406992	NM_001243265		Gm16130	E330033L03|OTTMUSG00000030814	predicted gene 16130	protein-coding
upeaks-48021	chrX	111509639	111509854	+	0	NA	intron (NM_025949, intron 1 of 24)	Lx3C|LINE|L1	28213	NM_025949	67071	Mm.37617	NM_025949	ENSMUSG00000025665	Rps6ka6	2610524K04Rik|RSK4|S6K-alpha-6	ribosomal protein S6 kinase polypeptide 6	protein-coding
upeaks-15247	chr15	7088607	7088946	+	0	NA	Intergenic	Intergenic	-40796	NM_001113386	16880	Mm.149720	NM_013584	ENSMUSG00000054263	Lifr	A230075M04Rik|AW061234|LIF	leukemia inhibitory factor receptor	protein-coding
upeaks-7494	chr11	76125533	76125986	+	0	NA	intron (NM_026664, intron 7 of 21)	intron (NM_026664, intron 7 of 21)	53871	NM_026664	68299	Mm.46397	NM_026664	ENSMUSG00000017288	Vps53	2010002A08Rik|2310040I21Rik|3100002B05Rik|Hccs1	VPS53 GARP complex subunit	protein-coding
upeaks-42187	chr7	144788643	144788915	+	0	NA	Intergenic	Intergenic	-49833	NM_008007	14174	Mm.4947	NM_008007	ENSMUSG00000031074	Fgf3	Fgf-3|Int-2|Int-P	fibroblast growth factor 3	protein-coding
upeaks-27120	chr2	167843151	167843376	+	0	NA	Intergenic	Intergenic	-89064	NM_011201	19246	Mm.277916	NM_011201	ENSMUSG00000027540	Ptpn1	PTP-1B|PTP-HA2|PTP1B	protein tyrosine phosphatase, non-receptor type 1	protein-coding
upeaks-22167	chr18	83928670	83929040	+	0	NA	Intergenic	Intergenic	157707	NM_001081300	110796	Mm.102136	NM_001081300	ENSMUSG00000046982	Tshz1	5730407I04Rik|D18Bwg1409e|Mtsh1|NY-CO-33|Sdccag33|Tsh1|mKIAA4206|teashirt1	teashirt zinc finger family member 1	protein-coding
upeaks-188	chr1	18191233	18191469	+	0	NA	Intergenic	LFSINE_Vert|SINE|tRNA	32213	NR_002879	654454	Mm.383637	NR_002879	ENSMUSG00000070977	Defb44-ps	Defb44|Defb49|Defb49-ps|EG574082	defensin beta 44, pseudogene	pseudo
upeaks-7501	chr11	76328508	76328737	+	0	NA	intron (NM_008750, intron 1 of 7)	intron (NM_008750, intron 1 of 7)	70519	NM_008750	18230	Mm.27915	NM_008750	ENSMUSG00000020844	Nxn	l11Jus13	nucleoredoxin	protein-coding
upeaks-26198	chr2	135866413	135866848	+	0	NA	intron (NM_013829, intron 2 of 36)	intron (NM_013829, intron 2 of 36)	124800	NM_013829	18798	Mm.38009	NM_013829	ENSMUSG00000039943	Plcb4	A930039J07Rik|AI854601|C230058B11Rik	phospholipase C, beta 4	protein-coding
upeaks-7176	chr11	66447593	66447853	+	0	NA	intron (NM_001034874, intron 2 of 4)	intron (NM_001034874, intron 2 of 4)	78403	NM_001034874	380702	Mm.351764	NM_001034874	ENSMUSG00000053930	Shisa6	Gm879|ckamp52	shisa family member 6	protein-coding
upeaks-3258	chr1	193317217	193317519	+	0	NA	intron (NM_008484, intron 3 of 22)	intron (NM_008484, intron 3 of 22)	15125	NM_001277928	16780	Mm.435441	NM_008484	ENSMUSG00000026639	Lamb3	-	laminin, beta 3	protein-coding
upeaks-39062	chr6	144370780	144371006	+	0	NA	Intergenic	(CGGGG)n|Simple_repeat|Simple_repeat	-161325	NM_001243163	20678	Mm.1752	NM_011444	ENSMUSG00000041540	Sox5	A730017D01Rik|AI528773	SRY (sex determining region Y)-box 5	protein-coding
upeaks-9725	chr12	50967274	50967800	+	0	NA	Intergenic	Intergenic	-37619	NR_126468	75494	Mm.416848	NR_126468		1700008C04Rik	-	RIKEN cDNA 1700008C04 gene	ncRNA
upeaks-21485	chr18	54074454	54074701	+	0	NA	Intergenic	Intergenic	212464	NM_152809	70425	Mm.368668	NM_152809	ENSMUSG00000073563	Csnk1g3	3300002K07Rik|C330049O21Rik	casein kinase 1, gamma 3	protein-coding
upeaks-1435	chr1	94835929	94836287	+	0	NA	Intergenic	RLTR30D2_MM|LTR|ERV1	38666	NR_040473	74689	Mm.399187	NR_040473	ENSMUSG00000100518	4930440C22Rik	-	RIKEN cDNA 4930440C22 gene	ncRNA
upeaks-34140	chr5	41855918	41856141	+	0	NA	Intergenic	RLTR41|LTR|ERV1	-11714	NM_001310601	665775	Mm.158726	NM_001081422	ENSMUSG00000061755	Bod1l	A230054D04Rik|AI853319|FAM44A|mKIAA1327	biorientation of chromosomes in cell division 1-like	protein-coding
upeaks-5680	chr10	126154002	126154206	+	0	NA	Intergenic	Intergenic	187885	NM_177152	320398	Mm.275586	NM_177152	ENSMUSG00000020105	Lrig3	9030421L11Rik|9130004I02Rik|9430095K15Rik|mKIAA3016	leucine-rich repeats and immunoglobulin-like domains 3	protein-coding
upeaks-29871	chr3	138262660	138262934	+	0	NA	Intergenic	Intergenic	-14848	NM_007409	11522	Mm.2409	NM_007409	ENSMUSG00000074207	Adh1	ADH-AA|AI194826|Adh-1|Adh-1-t|Adh-1e|Adh-1t|Adh-3e|Adh1-e|Adh1-t|Adh1tl|Adh3-e	alcohol dehydrogenase 1 (class I)	protein-coding
upeaks-15010	chr14	115979285	115979604	+	0	NA	intron (NM_175500, intron 7 of 7)	intron (NM_175500, intron 7 of 7)	-569892	NR_045761	75088	Mm.444706	NR_045761	ENSMUSG00000093551	4930505G20Rik	-	RIKEN cDNA 4930505G20 gene	ncRNA
upeaks-44242	chr8	111924918	111925124	+	0	NA	intron (NM_001033321, intron 2 of 6)	RLTR18|LTR|ERVK	8770	NM_001033321	234740	Mm.87513	NM_001033321	ENSMUSG00000031951	Tmem231	4932417I16Rik|Gm178	transmembrane protein 231	protein-coding
upeaks-3847	chr10	36811050	36811548	+	0	NA	intron (NM_001253355, intron 4 of 5)	intron (NM_001253355, intron 4 of 5)	-163245	NM_008229	15182	Mm.19806	NM_008229	ENSMUSG00000019777	Hdac2	D10Wsu179e|YAF1|Yy1bp|mRPD3	histone deacetylase 2	protein-coding
upeaks-14217	chr14	56402481	56402927	+	0	NA	promoter-TSS (NM_001033043)	promoter-TSS (NM_001033043)	7	NM_001033043	30054	Mm.287783	NM_001033043	ENSMUSG00000000365	Rnf17	MMIP-2|Mmip2|TDRD4	ring finger protein 17	protein-coding
upeaks-19951	chr17	54943532	54943815	+	0	NA	Intergenic	RMER17A|LTR|ERVK	-501709	NM_001347403	240119	Mm.311687	NM_172829	ENSMUSG00000024172	St6gal2	C230064G14Rik|St6galII|mKIAA1877	beta galactoside alpha 2,6 sialyltransferase 2	protein-coding
upeaks-29692	chr3	130327670	130327886	+	0	NA	intron (NM_029838, intron 2 of 37)	intron (NM_029838, intron 2 of 37)	146933	NM_198711	77018	Mm.91728	NM_029838	ENSMUSG00000058897	Col25a1	2700062B08Rik|CLAC-P	collagen, type XXV, alpha 1	protein-coding
upeaks-40409	chr7	67183740	67184019	+	0	NA	Intergenic	RMER10A|LTR|ERVL	38579	NR_131044	76628	Mm.384589	NR_131043	ENSMUSG00000097527	1700112J16Rik	-	RIKEN cDNA 1700112J16 gene	ncRNA
upeaks-18690	chr16	97310543	97310786	+	0	NA	Intergenic	MTD|LTR|ERVL-MaLR	-46064	NM_019517	56175	Mm.97885	NM_019517	ENSMUSG00000040605	Bace2	1110059C24Rik|AEPLC|AI850424|ALP56|ARP1|ASP1|ASP21|BAE2|CDA13|CEAP1|DRAP	beta-site APP-cleaving enzyme 2	protein-coding
upeaks-2164	chr1	151103127	151103326	+	0	NA	Intergenic	Intergenic	-34808	NR_038011	402734	Mm.337666	NR_038011		C730036E19Rik	lncLSTR	RIKEN cDNA C730036E19 gene	ncRNA
upeaks-39211	chr6	149457314	149457752	+	0	NA	intron (NM_009753, intron 1 of 8)	MLTR18C_MM|LTR|ERVK	48549	NM_001112796	12121	Mm.177181	NM_009753	ENSMUSG00000003452	Bicd1	B830009D06Rik|bic-D 1	bicaudal D homolog 1 (Drosophila)	protein-coding
upeaks-9041	chr11	120164621	120164822	+	0	NA	Intergenic	Intergenic	-13370	NM_001164799	72055	Mm.253403	NM_024249	ENSMUSG00000061306	Slc38a10	1810073N04Rik	solute carrier family 38, member 10	protein-coding
upeaks-27609	chr3	11027813	11028111	+	0	NA	Intergenic	Lx9|LINE|L1	-587832	NM_001127191	74718	Mm.440548	NM_029068	ENSMUSG00000027534	Snx16	4930522N22Rik|AI117577|AI747675	sorting nexin 16	protein-coding
upeaks-46824	chr9	105684819	105685102	+	0	NA	intron (NM_001081309, intron 16 of 19)	intron (NM_001081309, intron 16 of 19)	41965	NM_001081309	75669	Mm.274830	NM_029380	ENSMUSG00000032571	Pik3r4	2210010O15Rik|C730038E05Rik|C85833|D9Ertd418e	phosphatidylinositol 3 kinase, regulatory subunit, polypeptide 4, p150	protein-coding
upeaks-46593	chr9	94661755	94662153	+	0	NA	Intergenic	Intergenic	-7938	NM_177909	331004	Mm.326125	NM_177909	ENSMUSG00000031129	Slc9a9	5730527A11Rik|9930105B05|AI854429|Nhe9	solute carrier family 9 (sodium/hydrogen exchanger), member 9	protein-coding
upeaks-13814	chr14	32439829	32440036	+	0	NA	intron (NM_009891, intron 8 of 15)	intron (NM_009891, intron 8 of 15)	24918	NM_021712	20508	Mm.190503	NM_021712	ENSMUSG00000100241	Slc18a3	VAChT|VAT	solute carrier family 18 (vesicular monoamine), member 3	protein-coding
upeaks-19896	chr17	50038365	50038565	+	0	NA	intron (NM_181397, intron 6 of 9)	L1M5|LINE|L1	152032	NM_181397	76438	Mm.41854	NM_181397	ENSMUSG00000039316	Rftn1	2310015N21Rik|AI853526	raftlin lipid raft linker 1	protein-coding
upeaks-11142	chr13	6993998	6994212	+	0	NA	Intergenic	Intergenic	-345334	NM_001291071	56421	Mm.273874	NM_019703	ENSMUSG00000021196	Pfkp	1200015H23Rik|9330125N24Rik|ATP-PFK|PFK-C|PFK-P	phosphofructokinase, platelet	protein-coding
upeaks-17698	chr16	32538324	32538563	+	0	NA	Intergenic	Intergenic	42162	NM_199309	245308	Mm.76859	NM_199309	ENSMUSG00000052363	Zdhhc19	Gm1744|Gm616	zinc finger, DHHC domain containing 19	protein-coding
upeaks-17565	chr16	26615926	26616430	+	0	NA	intron (NM_001159318, intron 1 of 10)	intron (NM_001159318, intron 1 of 10)	34473	NM_001159317	16180	Mm.253424	NM_008364	ENSMUSG00000022514	Il1rap	6430709H04Rik|AI255955|AV239853|IL-1RAcP	interleukin 1 receptor accessory protein	protein-coding
upeaks-35543	chr5	122918355	122918618	+	0	NA	intron (NM_001003953, intron 12 of 22)	intron (NM_001003953, intron 12 of 22)	-18136	NM_013910	30841	Mm.86406	NM_013910	ENSMUSG00000029475	Kdm2b	Cxxc2|Fbl10|Fbxl10|Jhdm1b|PCCX2	lysine (K)-specific demethylase 2B	protein-coding
upeaks-43055	chr8	57328981	57329185	+	0	NA	Intergenic	Intergenic	-3352	NR_131041	75996	Mm.399754	NR_131041	ENSMUSG00000097910	5033428I22Rik	-	RIKEN cDNA 5033428I22 gene	ncRNA
upeaks-4459	chr10	74358954	74359367	+	0	NA	intron (NM_001142740, intron 15 of 31)	Lx|LINE|L1	537293	NM_001142748	11994	Mm.338933	NM_023115	ENSMUSG00000052613	Pcdh15	BB078305|ENSMUSG00000046980|Gm9815|Ush1f|av|nmf19|roda	protocadherin 15	protein-coding
upeaks-34362	chr5	64156178	64156804	+	0	NA	Intergenic	Intergenic	-3769	NM_001310611	57915	Mm.286353	NM_019636	ENSMUSG00000029174	Tbc1d1	1110062G02Rik|AI385682|AW555803|Nob1|Nobq1|Tbc1|mKIAA1108	TBC1 domain family, member 1	protein-coding
upeaks-1692	chr1	124954917	124955162	+	0	NA	Intergenic	Intergenic	480688	NM_001205385	74117	Mm.183102	NM_023735	ENSMUSG00000026341	Actr3	1200003A09Rik|Arp3	ARP3 actin-related protein 3	protein-coding
upeaks-44883	chr9	9412465	9412745	+	0	NA	Intergenic	MTEb|LTR|ERVL-MaLR	-173592	NM_027823	71544	Mm.334955	NM_027823	ENSMUSG00000050730	Arhgap42	9030420J04Rik|BE136619	Rho GTPase activating protein 42	protein-coding
upeaks-7820	chr11	86895637	86895851	+	0	NA	intron (NR_106195, intron 4 of 8)	intron (NR_106195, intron 4 of 8)	-88084	NM_026191	67487	Mm.260627	NM_026191	ENSMUSG00000018425	Dhx40	2410016C14Rik|ARG147|DDX40|PAD	DEAH (Asp-Glu-Ala-His) box polypeptide 40	protein-coding
upeaks-37041	chr6	41761752	41762057	+	0	NA	Intergenic	Intergenic	10393	NM_146576	258569	Mm.377571	NM_146576	ENSMUSG00000045479	Olfr459	MOR120-1	olfactory receptor 459	protein-coding
upeaks-17350	chr16	17499534	17499751	+	0	NA	exon (NM_001291070, exon 2 of 20)	exon (NM_001291070, exon 2 of 20)	7721	NM_001291070	72168	Mm.40038	NM_175178	ENSMUSG00000022763	Aifm3	2810401C16Rik|AI840249|Aifl	apoptosis-inducing factor, mitochondrion-associated 3	protein-coding
upeaks-10958	chr12	113240120	113240496	+	0	NA	Intergenic	RLTR9B2|LTR|ERVK	54405	NM_153776	69195	Mm.313244	NM_153776	ENSMUSG00000049036	Tmem121	2410008J05Rik|Hole	transmembrane protein 121	protein-coding
upeaks-30153	chr3	152029479	152029928	+	0	NA	Intergenic	Intergenic	136197	NM_016867	54120	Mm.97	NM_016867	ENSMUSG00000039131	Gipc2	2200002N01Rik|AU021850|Semcap2	GIPC PDZ domain containing family, member 2	protein-coding
upeaks-44901	chr9	11881656	11882048	+	0	NA	Intergenic	Intergenic	-977077	NM_001170787	244682	Mm.187021	NM_001033359	ENSMUSG00000039488	Cntn5	6720426O10Rik|A830025P08Rik|Gm507|NB-2	contactin 5	protein-coding
upeaks-43385	chr8	72268436	72268686	+	0	NA	Intergenic	Intergenic	28543	NM_007456	11767	Mm.290086	NM_007456	ENSMUSG00000003033	Ap1m1	AA408894|AP47|Adtm1A|Cltnm|mu1A	adaptor-related protein complex AP-1, mu subunit 1	protein-coding
upeaks-33695	chr5	21353605	21353873	+	0	NA	intron (NM_029195, intron 2 of 18)	intron (NM_029195, intron 2 of 18)	-18934	NM_008013	14190	Mm.292100	NM_008013	ENSMUSG00000039899	Fgl2	AI385601|musfiblp	fibrinogen-like protein 2	protein-coding
upeaks-1240	chr1	87880814	87881193	+	0	NA	intron (NM_177646, intron 2 of 29)	intron (NM_177646, intron 2 of 29)	-26704	NR_136921	100503175	Mm.426422	NR_136921	ENSMUSG00000101942	Gm19582	-	predicted gene, 19582	ncRNA
upeaks-31232	chr4	63625710	63625909	+	0	NA	Intergenic	Intergenic	-3380	NM_029324	75524	Mm.38543	NM_029324	ENSMUSG00000058935	1700018C11Rik	bM230C2.3	RIKEN cDNA 1700018C11 gene	protein-coding
upeaks-42279	chr8	8115954	8116470	+	0	NA	Intergenic	Intergenic	544561	NM_010111	13642	Mm.209813	NM_010111	ENSMUSG00000001300	Efnb2	ELF-2|Epl5|Eplg5|Htk-L|LERK-5|Lerk5|NLERK-1	ephrin B2	protein-coding
upeaks-13186	chr13	115673750	115674136	+	0	NA	Intergenic	Intergenic	-571979	NM_001033228	109700	Mm.317280	NM_001033228	ENSMUSG00000042284	Itga1	CD49A|E130012M19Rik|Vla1	integrin alpha 1	protein-coding
upeaks-22156	chr18	83399404	83399715	+	0	NA	Intergenic	Intergenic	-73675	NR_045361	70960	Mm.410834	NR_045361		4921531P14Rik	1700108N05Rik	RIKEN cDNA 4921531P14 gene	ncRNA
upeaks-23044	chr19	43584840	43585183	+	0	NA	Intergenic	Intergenic	-27314	NM_008699	18089	Mm.56994	NM_008699	ENSMUSG00000044220	Nkx2-3	Nkx-2.3|Nkx2.3|tinman	NK2 homeobox 3	protein-coding
upeaks-19275	chr17	28034979	28035333	+	0	NA	intron (NM_001286040, intron 12 of 24)	intron (NM_001286040, intron 12 of 24)	45428	NM_013687	21463	Mm.29758	NM_013687	ENSMUSG00000062859	Tcp11	D17Ken1|Tcp-11	t-complex protein 11	protein-coding
upeaks-38214	chr6	109176957	109177427	+	0	NA	Intergenic	Intergenic	348551	NM_138677	192193	Mm.21596	NM_138677	ENSMUSG00000030104	Edem1	A130059K23Rik|EDEM|mKIAA0212	ER degradation enhancer, mannosidase alpha-like 1	protein-coding
upeaks-13241	chr13	118460027	118460226	+	0	NA	Intergenic	MamSINE1|SINE|tRNA	-72874	NM_021556	59054	Mm.143810	NM_021556	ENSMUSG00000021731	Mrps30	2610020A16Rik|AA968347|PAP|Pdcd9	mitochondrial ribosomal protein S30	protein-coding
upeaks-41628	chr7	126281398	126281613	+	0	NA	intron (NM_145587, intron 1 of 3)	PB1D10|SINE|Alu	8886	NM_145587	104175	Mm.29660	NM_145587	ENSMUSG00000042978	Sbk1	Sbk	SH3-binding kinase 1	protein-coding
upeaks-15709	chr15	51349579	51349823	+	0	NA	intron (NR_045092, intron 1 of 5)	intron (NR_045092, intron 1 of 5)	45909	NR_045092	100502643	Mm.131987	NR_045092		Gm19303	-	predicted gene, 19303	ncRNA
upeaks-32012	chr4	115643010	115643230	+	0	NA	intron (NM_007823, intron 1 of 11)	intron (NM_007823, intron 1 of 11)	4585	NM_007823	13120	Mm.1840	NM_007823	ENSMUSG00000028713	Cyp4b1	-	cytochrome P450, family 4, subfamily b, polypeptide 1	protein-coding
upeaks-20378	chr17	78318906	78319185	+	0	NA	intron (NM_015800, intron 7 of 16)	intron (NM_015800, intron 7 of 16)	99107	NM_001285940	225020	Mm.236835	NM_199448	ENSMUSG00000056121	Fez2	9030616F16|D17Ertd315e	fasciculation and elongation protein zeta 2 (zygin II)	protein-coding
upeaks-16101	chr15	75648333	75648632	+	0	NA	Intergenic	Intergenic	30308	NM_028404	72960	Mm.182401	NM_028404	ENSMUSG00000000934	Top1mt	2900052H09Rik	DNA topoisomerase 1, mitochondrial	protein-coding
upeaks-45751	chr9	56895116	56895315	+	0	NA	intron (NM_139001, intron 8 of 9)	PB1|SINE|Alu	30111	NM_139001	121021	Mm.41329	NM_139001	ENSMUSG00000032911	Cspg4	4732461B14Rik|AN2|NG2	chondroitin sulfate proteoglycan 4	protein-coding
upeaks-15161	chr14	122464840	122465109	+	0	NA	exon (NM_022987, exon 1 of 2)	exon (NM_022987, exon 1 of 2)	684	NM_022987	65100	Mm.390761	NM_022987	ENSMUSG00000041703	Zic5	1700049L20Rik|Opr	zinc finger protein of the cerebellum 5	protein-coding
upeaks-31633	chr4	96766473	96766672	+	0	NA	intron (NM_001081284, intron 2 of 10)	intron (NM_001081284, intron 2 of 10)	18588	NM_001081284	620779	Mm.439625	NM_001081284	ENSMUSG00000078639	Gm12695	OTTMUSG00000008003	predicted gene 12695	protein-coding
upeaks-39192	chr6	148774211	148774410	+	0	NA	intron (NM_001081113, intron 24 of 24)	ID_B1|SINE|B4	57157	NM_001081113	320727	Mm.260105	NM_001081113	ENSMUSG00000040029	Ipo8	6230418K12Rik|Abcc10|C130009K11Rik|MRP7|OM-1|Om1|Ranbp8	importin 8	protein-coding
upeaks-44766	chr8	127995021	127995220	+	0	NA	Intergenic	Intergenic	283105	NR_105822	102465212		NR_105822	ENSMUSG00000099326	Mir21c	Gm28013|mmu-mir-21c	microRNA 21c	ncRNA
upeaks-47079	chr9	112833700	112834043	+	0	NA	Intergenic	Intergenic	577297	NR_033433	620760	Mm.259863	NR_015468	ENSMUSG00000087038	2900079G21Rik	C130083B14|Gm6179	RIKEN cDNA 2900079G21 gene	ncRNA
upeaks-7489	chr11	75802221	75802430	+	0	NA	intron (NR_136933, intron 1 of 3)	PB1|SINE|Alu	-6265	NM_007873	13447	Mm.5137	NM_007873	ENSMUSG00000020848	Doc2b	-	double C2, beta	protein-coding
upeaks-7198	chr11	67825613	67825894	+	0	NA	Intergenic	Intergenic	27482	NM_001013013	68460	Mm.22167	NM_001013013	ENSMUSG00000033044	Dhrs7c	1110001P11Rik|AI120487|SRP-35	dehydrogenase/reductase (SDR family) member 7C	protein-coding
upeaks-28555	chr3	84745824	84746036	+	0	NA	Intergenic	Intergenic	-69647	NM_001177773	50754	Mm.196475	NM_080428	ENSMUSG00000028086	Fbxw7	1110001A17Rik|AGO|Cdc4|Fbw7|Fbwd6|Fbx30|Fbxo30|Fbxw6|SEL-10	F-box and WD-40 domain protein 7	protein-coding
upeaks-31779	chr4	105101023	105101525	+	0	NA	intron (NM_178143, intron 1 of 8)	intron (NM_178143, intron 1 of 8)	8624	NM_178143	108079	Mm.48638	NM_178143	ENSMUSG00000028518	Prkaa2	2310008I11Rik|A830082D05|AMPKalpha2	protein kinase, AMP-activated, alpha 2 catalytic subunit	protein-coding
upeaks-3058	chr1	185209149	185209370	+	0	NA	intron (NM_001163754, intron 1 of 34)	L1M4|LINE|L1	5091	NM_001163754	98732	Mm.275841	NM_172649	ENSMUSG00000039318	Rab3gap2	1110059F07Rik|2010002H18Rik|5830469C09|AI851069|AW743433|RAB3-GAP150|mKIAA0839	RAB3 GTPase activating protein subunit 2	protein-coding
upeaks-308	chr1	33334068	33334505	+	0	NA	Intergenic	L2|LINE|L2	335508	NM_008922	19076	Mm.27705	NM_008922	ENSMUSG00000026134	Prim2	AI323589	DNA primase, p58 subunit	protein-coding
upeaks-25158	chr2	85131776	85132042	+	0	NA	Intergenic	Intergenic	-4451	NM_011784	23796	Mm.29368	NM_011784	ENSMUSG00000044338	Aplnr	APJ|Agtrl1|msr/apj	apelin receptor	protein-coding
upeaks-1553	chr1	110407521	110407781	+	0	NA	Intergenic	MusHAL1|LINE|L1	423928	NM_172853	241201	Mm.213407	NM_172853	ENSMUSG00000026312	Cdh7	9330156F07Rik|CDH7L1	cadherin 7, type 2	protein-coding
upeaks-18079	chr16	55396998	55397272	+	0	NA	Intergenic	L1VL4|LINE|L1	-97596	NR_039578	100628589		NR_039578	ENSMUSG00000093292	Mir5118	mmu-mir-5118|mu-mir-5118	microRNA 5118	ncRNA
upeaks-31266	chr4	65830523	65830773	+	0	NA	intron (NM_019514, intron 9 of 21)	intron (NM_019514, intron 9 of 21)	225662	NM_053084	69807	Mm.22786	NM_053084	ENSMUSG00000051675	Trim32	1810045E12Rik|3f3|BBS11|Zfp117	tripartite motif-containing 32	protein-coding
upeaks-35770	chr5	130924479	130924903	+	0	NA	intron (NM_145218, intron 6 of 10)	intron (NM_145218, intron 6 of 10)	382831	NM_145218	212996	Mm.299204	NM_145218	ENSMUSG00000034040	Wbscr17	AA388321|E330012B09Rik	Williams-Beuren syndrome chromosome region 17 homolog (human)	protein-coding
upeaks-20698	chr17	90843872	90844071	+	0	NA	intron (NM_001346957, intron 3 of 18)	intron (NM_001346957, intron 3 of 18)	-17198	NR_045463	78800	Mm.410772	NR_045463	ENSMUSG00000090160	4930480K15Rik	-	RIKEN cDNA 4930480K15 gene	ncRNA
upeaks-15510	chr15	33992906	33993107	+	0	NA	Intergenic	Intergenic	-89713	NM_026002	67154	Mm.130883	NM_026002	ENSMUSG00000022255	Mtdh	2610103J23Rik|3D3|3D3/Lyric|AEG-1|AV353288|D8Bwg1112e|Lyric	metadherin	protein-coding
upeaks-3299	chr1	194627722	194627954	+	0	NA	intron (NM_008882, intron 1 of 31)	intron (NM_008882, intron 1 of 31)	8009	NM_008882	18845	Mm.2251	NM_008882	ENSMUSG00000026640	Plxna2	2810428A13Rik|AA589422|AW457381|OCT|PlexA2|Plxn2|mKIAA0463	plexin A2	protein-coding
upeaks-26579	chr2	151894230	151894461	+	0	NA	Intergenic	Intergenic	-16862	NM_009641	11602	Mm.189536	NM_009641	ENSMUSG00000027460	Angpt4	ANG-3|ANG-4|Agpt4|Ang3	angiopoietin 4	protein-coding
upeaks-910	chr1	73399204	73399532	+	0	NA	intron (NR_040605, intron 1 of 2)	intron (NR_040605, intron 1 of 2)	400	NR_040605	78718	Mm.244075	NR_040605	ENSMUSG00000101812	D530049I02Rik	-	RIKEN cDNA D530049I02 gene	ncRNA
upeaks-31453	chr4	84548138	84548377	+	0	NA	intron (NM_172870, intron 2 of 5)	intron (NM_172870, intron 2 of 5)	126829	NM_172870	242509	Mm.190774	NM_172870	ENSMUSG00000028487	Bnc2	5031434M05Rik|8430420F16Rik	basonuclin 2	protein-coding
upeaks-28012	chr3	49766461	49766829	+	0	NA	Intergenic	Intergenic	-9329	NM_130448	73173	Mm.87246	NM_130448	ENSMUSG00000037892	Pcdh18	3110038E07Rik|BB095589|PCDH68L	protocadherin 18	protein-coding
upeaks-17271	chr16	13364159	13364689	+	0	NA	intron (NM_153588, intron 1 of 14)	L2|LINE|L2	6003	NM_153588	239719	Mm.270643	NM_153588	ENSMUSG00000009569	Mkl2	ENSMUSG00000075401|Gt4-1|MRTF-B|Mrtfb|mKIAA1243	MKL/myocardin-like 2	protein-coding
upeaks-12534	chr13	78443034	78443352	+	0	NA	Intergenic	Lx|LINE|L1	-244320	NM_010151	13865	Mm.439653	NM_010151	ENSMUSG00000069171	Nr2f1	COUP-TF1|COUP-TFI|COUPTFA|EAR-3|EAR3|Erbal3|SVP44|Tcfcoup1	nuclear receptor subfamily 2, group F, member 1	protein-coding
upeaks-14963	chr14	106327897	106328152	+	0	NA	Intergenic	Intergenic	158496	NR_045938	73631	Mm.48862	NR_045938	ENSMUSG00000099794	1700128A07Rik	-	RIKEN cDNA 1700128A07 gene	ncRNA
upeaks-11521	chr13	27205987	27206226	+	0	NA	Intergenic	(AATAG)n|Simple_repeat|Simple_repeat	7203	NM_001163218	27372	Mm.291456	NM_013766	ENSMUSG00000017922	Prl3c1	Ghd7|PLP-J|Prlpi|Prlpj|decidualin	prolactin family 3, subfamily c, member 1	protein-coding
upeaks-8483	chr11	103884630	103885063	+	0	NA	intron (NM_008740, intron 8 of 20)	intron (NM_008740, intron 8 of 20)	69210	NM_008740	18195	Mm.260117	NM_008740	ENSMUSG00000034187	Nsf	AI316878|AU020090|AU067812|SKD2	N-ethylmaleimide sensitive fusion protein	protein-coding
upeaks-13001	chr13	107461124	107461393	+	0	NA	Intergenic	Intergenic	-8564	NR_045083	105120	Mm.417700	NR_045083		AI197445	-	expressed sequence AI197445	ncRNA
upeaks-21391	chr18	46705562	46705761	+	0	NA	Intergenic	Intergenic	22681	NM_033037	12583	Mm.241056	NM_033037	ENSMUSG00000033022	Cdo1	1300002L19Rik|Cdo|D18Ucla3	cysteine dioxygenase 1, cytosolic	protein-coding
upeaks-47215	chr9	118660160	118660540	+	0	NA	intron (NM_133721, intron 6 of 27)	intron (NM_133721, intron 6 of 27)	-51342	NM_001113514	104099	Mm.335520	NM_133721	ENSMUSG00000039115	Itga9	(alpha)9|2610002H11Rik|6720458D17Rik|AI461869|D130073C02|D9Ertd428e	integrin alpha 9	protein-coding
upeaks-22006	chr18	77870015	77870313	+	0	NA	intron (NM_013831, intron 6 of 14)	intron (NM_013831, intron 6 of 14)	-68303	NM_001195633	100502841	Mm.297782	NM_001195633	ENSMUSG00000039840	Epg5	4732475F16|5430411K18Rik|AI661957|AW456499|mKIAA1632	ectopic P-granules autophagy protein 5 homolog (C. elegans)	protein-coding
upeaks-38347	chr6	115986843	115987060	+	0	NA	intron (NM_026376, intron 1 of 35)	intron (NM_026376, intron 1 of 35)	8054	NM_026376	67784	Mm.3085	NM_026376	ENSMUSG00000030123	Plxnd1	6230425C21Rik|b2b1863Clo|b2b553Clo	plexin D1	protein-coding
upeaks-3073	chr1	185774868	185775078	+	0	NA	intron (NR_030555, intron 4 of 6)	intron (NR_030555, intron 4 of 6)	237637	NR_030555	100124483		NR_030555	ENSMUSG00000076976	Mir297c	Mirn297c	microRNA 297c	ncRNA
upeaks-24617	chr2	57496643	57496843	+	0	NA	Intergenic	MLT1J2|LTR|ERVL-MaLR	258361	NM_010274	14571	Mm.3711	NM_010274	ENSMUSG00000026827	Gpd2	AA408484|AI448216|AU021455|AW494132|GPDH|Gdm1|Gpd-m|Gpdh-m|TISP38	glycerol phosphate dehydrogenase 2, mitochondrial	protein-coding
upeaks-41870	chr7	133954187	133954435	+	0	NA	intron (NM_007400, intron 11 of 22)	intron (NM_007400, intron 11 of 22)	-171526	NM_001286031	101437	Mm.199223	NM_133941	ENSMUSG00000030986	Dhx32	3110079L04Rik|4732469F02Rik|AA408140|Ddx32	DEAH (Asp-Glu-Ala-His) box polypeptide 32	protein-coding
upeaks-15574	chr15	36987186	36987552	+	0	NA	Intergenic	Intergenic	20033	NM_026521	68036	Mm.371631	NM_026521	ENSMUSG00000062397	Zfp706	3110006P09Rik|AA793007|AW536850|C77232|Znf706	zinc finger protein 706	protein-coding
upeaks-42345	chr8	11259785	11260025	+	0	NA	intron (NR_133670, intron 2 of 52)	intron (NR_133670, intron 2 of 52)	-52900	NM_009932	12827	Mm.181021	NM_009932	ENSMUSG00000031503	Col4a2	Col4a-2	collagen, type IV, alpha 2	protein-coding
upeaks-9528	chr12	31618209	31618484	+	0	NA	intron (NM_007530, intron 4 of 6)	Lx2|LINE|L1	16251	NM_007530	12033	Mm.242379	NM_007530	ENSMUSG00000020650	Bcap29	AW208404|Bap29	B cell receptor associated protein 29	protein-coding
upeaks-29696	chr3	130624828	130625030	+	0	NA	intron (NM_027907, intron 4 of 12)	PB1|SINE|Alu	7354	NM_027907	71760	Mm.29125	NM_027907	ENSMUSG00000019232	Etnppl	1300019H02Rik|AI195447|Agxt2l1	ethanolamine phosphate phospholyase	protein-coding
upeaks-12821	chr13	97417325	97417586	+	0	NA	Intergenic	Intergenic	-17515	NR_110432	100039691	Mm.219358	NR_110430	ENSMUSG00000078952	Lncenc1	ENSMUSG00000078952|Gm11019|Gm2373|Lincenc1|Platr18|linc-Enc1	long non-coding RNA, embryonic stem cells expressed 1	ncRNA
upeaks-19944	chr17	53661481	53661805	+	0	NA	intron (NM_020005, intron 13 of 17)	intron (NM_020005, intron 13 of 17)	27672	NM_028232	72415	Mm.153202	NM_028232	ENSMUSG00000023940	Sgol1	3300001M08Rik|C81037|Sgo1	shugoshin-like 1 (S. pombe)	protein-coding
upeaks-31556	chr4	90373989	90374345	+	0	NA	Intergenic	Lx2|LINE|L1	-12853	NR_033610	619842	Mm.484218	NR_033610	ENSMUSG00000080756	Gm12633	OTTMUSG00000007790	zinc finger protein 352 pseudogene	pseudo
upeaks-38920	chr6	137645369	137645568	+	0	NA	intron (NM_007945, intron 1 of 21)	MTC|LTR|ERVL-MaLR	3817	NM_007945	13860	Mm.235346	NM_007945	ENSMUSG00000015766	Eps8	AW261790	epidermal growth factor receptor pathway substrate 8	protein-coding
upeaks-29627	chr3	127544779	127545052	+	0	NA	promoter-TSS (NR_029653)	promoter-TSS (NR_029653)	-313	NR_030403	723948		NR_030403	ENSMUSG00000076252	Mir302b	Mirn302b|mir-302b	microRNA 302b	ncRNA
upeaks-36920	chr6	36555618	36556058	+	0	NA	Intergenic	Lx2|LINE|L1	134096	NR_030524	735279		NR_030524	ENSMUSG00000070075	Mir490	Mirn490|mir-490|mmu-mir-490	microRNA 490	ncRNA
upeaks-31319	chr4	72161949	72162189	+	0	NA	intron (NM_001285531, intron 6 of 6)	intron (NM_001285531, intron 6 of 6)	38824	NM_001285531	21885	Mm.278444	NM_011599	ENSMUSG00000008305	Tle1	C230057C06Rik|Estm14|Grg-1|Grg1|Tle4l	transducin-like enhancer of split 1	protein-coding
upeaks-36648	chr6	21787281	21787666	+	0	NA	intron (NM_173007, intron 8 of 8)	intron (NM_173007, intron 8 of 8)	65042	NM_173007	269831	Mm.21950	NM_173007	ENSMUSG00000029669	Tspan12	9030619E17|AI426782|AI663988|AW111457|Tm4sf12	tetraspanin 12	protein-coding
upeaks-30632	chr4	24985537	24986007	+	0	NA	intron (NM_030733, intron 1 of 1)	intron (NM_030733, intron 1 of 1)	12353	NM_030733	81006	Mm.160412	NM_030733	ENSMUSG00000040372	Gpr63	PSP24beta|Psp24-2	G protein-coupled receptor 63	protein-coding
upeaks-22092	chr18	81047375	81047745	+	0	NA	Intergenic	Intergenic	-60982	NM_178280	20689	Mm.215917	NM_178280	ENSMUSG00000024565	Sall3	B130022O04Rik|Msal|Msal-1|Sal|Salt|Spalt	sal-like 3 (Drosophila)	protein-coding
upeaks-3304	chr1	194677842	194678047	+	0	NA	intron (NM_008882, intron 3 of 31)	intron (NM_008882, intron 3 of 31)	58115	NM_008882	18845	Mm.2251	NM_008882	ENSMUSG00000026640	Plxna2	2810428A13Rik|AA589422|AW457381|OCT|PlexA2|Plxn2|mKIAA0463	plexin A2	protein-coding
upeaks-27710	chr3	21770049	21770373	+	0	NA	Intergenic	Intergenic	-306441	NM_030732	81004	Mm.202966	NM_030732	ENSMUSG00000027630	Tbl1xr1	8030499H02Rik|A630076E03Rik|AW539987|C21|C230089I12Rik|DC42|Ira1|TBLR1	transducin (beta)-like 1X-linked receptor 1	protein-coding
upeaks-14463	chr14	67667801	67668000	+	0	NA	Intergenic	Intergenic	47710	NM_001110162	108912	Mm.33831	NM_175384	ENSMUSG00000048922	Cdca2	2610311M19Rik|AI586158	cell division cycle associated 2	protein-coding
upeaks-16098	chr15	75603800	75604024	+	0	NA	Intergenic	Intergenic	7245	NM_001347039	68453	Mm.46367	NM_026730	ENSMUSG00000022579	Gpihbp1	1110002J19Rik|GPI-HBP1	GPI-anchored HDL-binding protein 1	protein-coding
upeaks-47496	chrX	13395852	13396054	+	0	NA	Intergenic	PB1D7|SINE|Alu	-71719	NM_173415	236690	Mm.90233	NM_173415	ENSMUSG00000051228	Nyx	CLNP|CSNB1|CSNB4|nob	nyctalopin	protein-coding
upeaks-21445	chr18	50711469	50711831	+	0	NA	Intergenic	Intergenic	-142951	NM_026108	67365	Mm.158150	NM_026108	ENSMUSG00000048875	Hdhd1a	1700121L12Rik|GS1|Hdhd1|Pudp	haloacid dehalogenase-like hydrolase domain containing 1A	protein-coding
upeaks-45252	chr9	32607268	32607640	+	0	NA	Intergenic	Intergenic	-66002	NM_008026	14247	Mm.258908	NM_008026	ENSMUSG00000016087	Fli1	EWSR2|Fli-1|SIC-1|Sic1	Friend leukemia integration 1	protein-coding
upeaks-37221	chr6	52332719	52332995	+	0	NA	Intergenic	Intergenic	-18025	NR_038163	70593	Mm.158412	NR_038163	ENSMUSG00000086126	Evx1os	5730457N03Rik|Evx1as	even skipped homeotic gene 1, opposite strand	ncRNA
upeaks-30150	chr3	151938545	151938813	+	0	NA	Intergenic	Intergenic	-101151	NM_008966	19220	Mm.331442	NM_008966	ENSMUSG00000028036	Ptgfr	AI957154|PGF|fp	prostaglandin F receptor	protein-coding
upeaks-17671	chr16	31598351	31598691	+	0	NA	Intergenic	Intergenic	-64922	NM_001252435	13383	Mm.382	NM_007862	ENSMUSG00000022770	Dlg1	B130052P05Rik|Dlgh1|E-dlg/SAP97|SAP-97|SAP97|mKIAA4187	discs, large homolog 1 (Drosophila)	protein-coding
upeaks-22019	chr18	78501651	78502160	+	0	NA	intron (NM_030683, intron 2 of 11)	intron (NM_030683, intron 2 of 11)	95045	NM_030683	27411	Mm.44158	NM_030683	ENSMUSG00000024552	Slc14a2	UT-A1|UT-A3	solute carrier family 14 (urea transporter), member 2	protein-coding
upeaks-44870	chr9	8114537	8114776	+	0	NA	intron (NM_001045524, intron 3 of 10)	RLTR1A2_MM|LTR|ERV1	19638	NM_001045524	234915	Mm.101341	NM_001045524	ENSMUSG00000040729	Cep126	Kiaa1377|mKIAA1377	centrosomal protein 126	protein-coding
upeaks-6649	chr11	46062171	46062390	+	0	NA	intron (NM_001291890, intron 2 of 22)	intron (NM_001291890, intron 2 of 22)	6296	NM_001291891	11492	Mm.89940	NM_009616	ENSMUSG00000011256	Adam19	AL024287|MADDAM|MTLNB|Mltnb	a disintegrin and metallopeptidase domain 19 (meltrin beta)	protein-coding
upeaks-21066	chr18	30166411	30166687	+	0	NA	Intergenic	Intergenic	-106347	NM_181414	225326	Mm.194127	NM_181414	ENSMUSG00000033628	Pik3c3	5330434F23Rik|Vps34	phosphoinositide-3-kinase, class 3	protein-coding
upeaks-44395	chr8	119970469	119970682	+	0	NA	Intergenic	Intergenic	-21863	NM_030209	78892	Mm.264680	NM_030209	ENSMUSG00000031825	Crispld2	1810049K24Rik|Lcrisp2|Lgl1|coffeecrisp	cysteine-rich secretory protein LCCL domain containing 2	protein-coding
upeaks-34989	chr5	105053151	105053521	+	0	NA	intron (NM_029509, intron 1 of 9)	intron (NM_029509, intron 1 of 9)	225	NM_029509	76074	Mm.458519	NM_029509	ENSMUSG00000034438	Gbp8	5830443L24Rik|mGBP8	guanylate-binding protein 8	protein-coding
upeaks-16672	chr15	91609771	91609970	+	0	NA	Intergenic	Intergenic	-36609	NM_001033633	239606	Mm.360596	NM_001033633	ENSMUSG00000036298	Slc2a13	6530403A04|A630029G22Rik|AI505012|Gm308	solute carrier family 2 (facilitated glucose transporter), member 13	protein-coding
upeaks-29097	chr3	102545971	102546365	+	0	NA	Intergenic	RMER19B|LTR|ERVK	76249	NM_013609	18049	Mm.1259	NM_013609	ENSMUSG00000027859	Ngf	Ngfb	nerve growth factor	protein-coding
upeaks-43492	chr8	79277421	79277946	+	0	NA	intron (NM_133823, intron 3 of 6)	intron (NM_133823, intron 3 of 6)	17273	NM_133823	109136	Mm.26510	NM_133823	ENSMUSG00000037022	Mmaa	2810018E08Rik|AI840684	methylmalonic aciduria (cobalamin deficiency) type A	protein-coding
upeaks-39533	chr7	19744677	19744933	+	0	NA	intron (NM_008990, intron 1 of 8)	intron (NM_008990, intron 1 of 8)	4768	NM_008990	19294	Mm.4341	NM_008990	ENSMUSG00000062300	Nectin2	AI325026|AI987993|Cd112|MPH|Pvr|Pvrl2|Pvs|nectin-2	nectin cell adhesion molecule 2	protein-coding
upeaks-2396	chr1	160825491	160825915	+	0	NA	Intergenic	Intergenic	-32765	NM_013862	29809	Mm.25833	NM_013862	ENSMUSG00000026721	Rabgap1l	5830411O09Rik|8430421H08Rik|9630005B12Rik|AW049894|HHL|Hh1|mKIAA0471	RAB GTPase activating protein 1-like	protein-coding
upeaks-6607	chr11	43929385	43929592	+	0	NA	Intergenic	Intergenic	-28251	NM_001284380	11548	Mm.39086	NM_007416	ENSMUSG00000050541	Adra1b	[a]1b	adrenergic receptor, alpha 1b	protein-coding
upeaks-20381	chr17	78349612	78349836	+	0	NA	intron (NM_015800, intron 11 of 16)	intron (NM_015800, intron 11 of 16)	68428	NM_001285940	225020	Mm.236835	NM_199448	ENSMUSG00000056121	Fez2	9030616F16|D17Ertd315e	fasciculation and elongation protein zeta 2 (zygin II)	protein-coding
upeaks-9804	chr12	55433923	55434122	+	0	NA	intron (NR_035430, intron 1 of 3)	intron (NR_035430, intron 1 of 3)	35197	NM_011968	26443	Mm.30210	NM_011968	ENSMUSG00000021024	Psma6	IOTA	proteasome (prosome, macropain) subunit, alpha type 6	protein-coding
upeaks-228	chr1	21614008	21614289	+	0	NA	intron (NM_001310477, intron 1 of 12)	intron (NM_001310477, intron 1 of 12)	230592	NM_001113187	98582	Mm.326336	NM_001113187	ENSMUSG00000085079	Khdc1b	AU014713|AU015226|AU024076|AY238603|C85331|C86372|C88118|Khdc1|Khdc1c	KH domain containing 1B	protein-coding
upeaks-21820	chr18	68753479	68753722	+	0	NA	Intergenic	Intergenic	14200	NR_105774	102465183		NR_105774	ENSMUSG00000099300	Mir6356	Gm27461|mmu-mir-6356	microRNA 6356	ncRNA
upeaks-31605	chr4	95389677	95389900	+	0	NA	Intergenic	Intergenic	-167719	NM_001113412	75578	Mm.276098	NM_029347	ENSMUSG00000028573	Fggy	2310009E04Rik	FGGY carbohydrate kinase domain containing	protein-coding
upeaks-15531	chr15	35308433	35308784	+	0	NA	intron (NR_045280, intron 2 of 2)	intron (NR_045280, intron 2 of 2)	12496	NM_054049	107587	Mm.46336	NM_054049	ENSMUSG00000022330	Osr2	5430409I15Rik|Osr2A|Osr2B	odd-skipped related 2	protein-coding
upeaks-1032	chr1	77338328	77338607	+	0	NA	Intergenic	Intergenic	158301	NR_105770	102465180		NR_105770	ENSMUSG00000099141	Mir6352	Gm27481|mmu-mir-6352	microRNA 6352	ncRNA
upeaks-1548	chr1	108239068	108239609	+	0	NA	Intergenic	Lx2|LINE|L1	322079	NR_102307	319596	Mm.136054	NR_102306	ENSMUSG00000100457	D830032E09Rik	-	RIKEN cDNA D830032E09 gene	ncRNA
upeaks-5449	chr10	117042269	117042663	+	0	NA	Intergenic	Intergenic	-2875	NM_146242	237560	Mm.37320	NM_146242	ENSMUSG00000060187	Lrrc10	D330003I11Rik|Hrlrrp|Serdin1	leucine rich repeat containing 10	protein-coding
upeaks-2479	chr1	164433925	164434415	+	0	NA	intron (NM_138314, intron 13 of 13)	intron (NM_138314, intron 13 of 13)	24185	NM_009721	11931	Mm.4550	NM_009721	ENSMUSG00000026576	Atp1b1	Atp4b|Atpb|Atpb-1|NKbeta1	ATPase, Na+/K+ transporting, beta 1 polypeptide	protein-coding
upeaks-28289	chr3	65608474	65608746	+	0	NA	Intergenic	Intergenic	-50678	NR_106200	102465905		NR_106200	ENSMUSG00000098944	Mir8120	Gm27637|mmu-mir-8120	microRNA 8120	ncRNA
upeaks-18416	chr16	87307149	87307683	+	0	NA	Intergenic	Intergenic	-46769	NM_026366	67768	Mm.296532	NM_026366	ENSMUSG00000044442	N6amt1	5830445C04Rik|Hemk2|Pred28	N-6 adenine-specific DNA methyltransferase 1 (putative)	protein-coding
upeaks-37930	chr6	92304158	92304398	+	0	NA	Intergenic	Intergenic	-59628	NM_009426	22044	Mm.1363	NM_009426	ENSMUSG00000005892	Trh	Pro-TRH|Trf	thyrotropin releasing hormone	protein-coding
upeaks-14822	chr14	100437514	100438015	+	0	NA	Intergenic	Intergenic	-287968	NM_010636	16597	Mm.396499	NM_010636	ENSMUSG00000072294	Klf12	2700063E05Rik|AI225908|AI315654|AP-2rep|B130052C06Rik|D530033K05Rik	Kruppel-like factor 12	protein-coding
upeaks-24245	chr2	32914945	32915260	+	0	NA	intron (NM_146119, intron 5 of 13)	intron (NM_146119, intron 5 of 13)	38968	NM_146119	227737	Mm.301646	NM_146119	ENSMUSG00000026796	Fam129b	9130404D14Rik	family with sequence similarity 129, member B	protein-coding
upeaks-31925	chr4	109884389	109884650	+	0	NA	intron (NM_007983, intron 14 of 18)	intron (NM_007983, intron 14 of 18)	-93506	NM_172296	242620	Mm.32825	NM_172296	ENSMUSG00000047143	Dmrta2	Dmrt5	doublesex and mab-3 related transcription factor like family A2	protein-coding
upeaks-10621	chr12	102546549	102547139	+	0	NA	Intergenic	Intergenic	-8097	NM_007693	12652	Mm.4137	NM_007693	ENSMUSG00000021194	Chga	ChrA|cgA	chromogranin A	protein-coding
upeaks-10966	chr12	113927860	113928125	+	0	NA	Intergenic	Lx2B2|LINE|L1	384084	NM_174885	238406	Mm.188683	NM_174885	ENSMUSG00000043945	Adam6a	Adam6|tMDCIV	a disintegrin and metallopeptidase domain 6A	protein-coding
upeaks-6012	chr11	8579869	8580146	+	0	NA	intron (NM_001083587, intron 3 of 30)	intron (NM_001083587, intron 3 of 30)	84528	NM_001083587	319939	Mm.337820	NM_001083587	ENSMUSG00000020422	Tns3	BC023928|F830010I22Rik|TEM6|Tens1	tensin 3	protein-coding
upeaks-9069	chr11	120620697	120620942	+	0	NA	exon (NM_153056, exon 7 of 10)	exon (NM_153056, exon 7 of 10)	-2874	NM_001347615	68671	Mm.21439	NM_024229	ENSMUSG00000025137	Pcyt2	1110033E03Rik|ET	phosphate cytidylyltransferase 2, ethanolamine	protein-coding
upeaks-13299	chr14	4415023	4415249	+	0	NA	Intergenic	Intergenic	-15856	NM_001242945	100041306	Mm.396155	NM_001242945	ENSMUSG00000094132	Gm3264	-	predicted gene 3264	protein-coding
upeaks-39715	chr7	28302279	28302485	+	0	NA	promoter-TSS (NM_007866)	promoter-TSS (NM_007866)	-597	NM_007866	13389	Mm.12896	NM_007866	ENSMUSG00000003436	Dll3	pu|pudgy	delta-like 3 (Drosophila)	protein-coding
upeaks-42311	chr8	9287199	9287442	+	0	NA	intron (NM_001347127, intron 1 of 3)	intron (NM_001347127, intron 1 of 3)	142651	NR_073360	74688	Mm.159298	NR_073360	ENSMUSG00000109215	4930453L07Rik	-	RIKEN cDNA 4930453L07 gene	ncRNA
upeaks-21719	chr18	65055023	65055254	+	0	NA	intron (NM_031881, intron 1 of 29)	intron (NM_031881, intron 1 of 29)	31611	NM_031881	83814	Mm.98668	NM_031881	ENSMUSG00000024589	Nedd4l	1300012C07Rik|Nedd4-2|Nedd4b	neural precursor cell expressed, developmentally down-regulated gene 4-like	protein-coding
upeaks-7432	chr11	74590058	74590356	+	0	NA	promoter-TSS (NM_001015046)	promoter-TSS (NM_001015046)	-49	NM_001015046	380711	Mm.425690	NM_001015046	ENSMUSG00000038807	Rap1gap2	AU067654|Garnl4|Gm1561|mKIAA1039	RAP1 GTPase activating protein 2	protein-coding
upeaks-15376	chr15	22255066	22255329	+	0	NA	Intergenic	L1_Mus3|LINE|L1	459787	NM_001165971	545091	Mm.475598	NM_001165971		Gm5803	EG545091	predicted gene 5803	protein-coding
upeaks-25811	chr2	120351444	120351647	+	0	NA	intron (NR_027618, intron 1 of 25)	intron (NR_027618, intron 1 of 25)	1588	NR_027618	269338	Mm.246131	NM_147153	ENSMUSG00000027291	Vps39	A230065P22Rik|AW743070|Vam6|Vam6P|mVam6	VPS39 HOPS complex subunit	protein-coding
upeaks-5332	chr10	110881309	110881584	+	0	NA	intron (NR_045979, intron 2 of 2)	intron (NR_045979, intron 2 of 2)	15061	NR_045979	75630	Mm.392786	NR_045979	ENSMUSG00000101801	1700020G17Rik	4930480D05Rik	RIKEN cDNA 1700020G17 gene	ncRNA
upeaks-25079	chr2	80456651	80457147	+	0	NA	Intergenic	Intergenic	-9503	NM_011356	20378	Mm.427436	NM_011356	ENSMUSG00000027004	Frzb	Frp|Sfrp3|frezzled|fritz|frzb-1	frizzled-related protein	protein-coding
upeaks-20046	chr17	57265037	57265479	+	0	NA	Intergenic	Intergenic	-13842	NM_011691	22324	Mm.248172	NM_011691	ENSMUSG00000034116	Vav1	Vav|vav-T	vav 1 oncogene	protein-coding
upeaks-46715	chr9	100452653	100452852	+	0	NA	Intergenic	Intergenic	33721	NM_001033543	213208	Mm.242896	NM_001033543	ENSMUSG00000044244	Il20rb	AV228068|Fndc6|Gm186|Il20R2	interleukin 20 receptor beta	protein-coding
upeaks-46219	chr9	73063656	73063914	+	0	NA	promoter-TSS (NM_001301232)	promoter-TSS (NM_001301232)	-363	NM_001301232	11891	Mm.34867	NM_023635	ENSMUSG00000032202	Rab27a	2210402C08Rik|2410003M20Rik|4933437C11Rik|ash	RAB27A, member RAS oncogene family	protein-coding
upeaks-29544	chr3	123107264	123107463	+	0	NA	intron (NM_080451, intron 4 of 4)	intron (NM_080451, intron 4 of 4)	-72376	NM_021503	59006	Mm.141157	NM_021503	ENSMUSG00000028116	Myoz2	1110012I24Rik|Fatz-2|Myozl2	myozenin 2	protein-coding
upeaks-22243	chr19	3630626	3630855	+	0	NA	intron (NM_008513, intron 5 of 22)	intron (NM_008513, intron 5 of 22)	-54991	NM_029456	52036	Mm.284686	NM_028999	ENSMUSG00000024908	Ppp6r3	4930528G08Rik|9130026N02Rik|D19Bwg1430e|D19Ertd703e|Pp6r3|Ppcs3|Pptcs3|Sapl|Saps3|mKIAA1558	protein phosphatase 6, regulatory subunit 3	protein-coding
upeaks-46159	chr9	70806084	70806332	+	0	NA	intron (NM_001324473, intron 6 of 8)	PB1|SINE|Alu	127226	NM_007399	11487	Mm.3037	NM_007399	ENSMUSG00000054693	Adam10	1700031C13Rik|MADM|kuz|kuzbanian	a disintegrin and metallopeptidase domain 10	protein-coding
upeaks-36724	chr6	28855441	28855687	+	0	NA	intron (NM_019776, intron 16 of 23)	intron (NM_019776, intron 16 of 23)	-23817	NM_138682	192198	Mm.443660	NM_138682	ENSMUSG00000049939	Lrrc4	MBAG1|NGL-2|NGL2|NLG-2|Nag14	leucine rich repeat containing 4	protein-coding
upeaks-15	chr1	4615402	4615617	+	0	NA	Intergenic	Intergenic	-118155	NM_001289467	20671	Mm.279103	NM_011441	ENSMUSG00000025902	Sox17	-	SRY (sex determining region Y)-box 17	protein-coding
upeaks-17303	chr16	15384135	15384461	+	0	NA	Intergenic	Intergenic	210220	NM_001159351	70620	Mm.235407	NM_023585	ENSMUSG00000022674	Ube2v2	1110021H13Rik|4632410D19Rik|5730524P06Rik|6820402M05|AI848315|C81524|MMS2	ubiquitin-conjugating enzyme E2 variant 2	protein-coding
upeaks-22216	chr18	88685761	88685967	+	0	NA	Intergenic	Intergenic	208343	NM_018821	54607	Mm.91920	NM_018821	ENSMUSG00000056153	Socs6	1500012M23Rik|5830401B18Rik|AI447482|Cis4|Cish4|HSPC060|SOCS-4|SOCS-6|SSI4|STAI4|STATI4|Socs4	suppressor of cytokine signaling 6	protein-coding
upeaks-16331	chr15	80012640	80013181	+	0	NA	intron (NM_011057, intron 1 of 6)	CpG	1898	NM_011057	18591	Mm.144089	NM_011057	ENSMUSG00000000489	Pdgfb	PDGF-B|Sis	platelet derived growth factor, B polypeptide	protein-coding
upeaks-45517	chr9	45000286	45000496	+	0	NA	intron (NM_007648, intron 7 of 7)	intron (NM_007648, intron 7 of 7)	9199	NM_007648	12501	Mm.210361	NM_007648	ENSMUSG00000032093	Cd3e	AI504783|CD3|CD3epsilon|T3e	CD3 antigen, epsilon polypeptide	protein-coding
upeaks-6664	chr11	46683801	46684079	+	0	NA	intron (NM_134249, intron 3 of 8)	intron (NM_134249, intron 3 of 8)	6417	NM_001161356	171284	Mm.234654	NM_134249	ENSMUSG00000040413	Timd2	AA816106|AU019358|AU019662|C78111|G9D3|TIM-2|Tim2	T cell immunoglobulin and mucin domain containing 2	protein-coding
upeaks-45241	chr9	32323831	32324095	+	0	NA	intron (NM_010605, intron 2 of 3)	intron (NM_010605, intron 2 of 3)	20274	NM_010605	16521	Mm.69472	NM_010605	ENSMUSG00000032034	Kcnj5	GIRK4|Kir3.4	potassium inwardly-rectifying channel, subfamily J, member 5	protein-coding
upeaks-14705	chr14	79902421	79902630	+	0	NA	Intergenic	Intergenic	-33349	NR_033535	100038734	Mm.387484	NR_033535		Gm10845	ENSMUSG00000075496	predicted gene 10845	ncRNA
upeaks-9902	chr12	69082630	69082917	+	0	NA	Intergenic	Intergenic	76413	NM_009093	20090	Mm.379006	NM_009093	ENSMUSG00000034892	Rps29	-	ribosomal protein S29	protein-coding
upeaks-25177	chr2	87294047	87294415	+	0	NA	Intergenic	L1_Mus3|LINE|L1	-14533	NM_207632	404328	Mm.377942	NM_207632	ENSMUSG00000083706	Olfr1118	MOR264-22|Olfr1118-ps	olfactory receptor 1118	protein-coding
upeaks-24412	chr2	38823041	38823332	+	0	NA	intron (NM_010264, intron 3 of 10)	intron (NM_010264, intron 3 of 10)	-29549	NR_029568	387176		NR_029568	ENSMUSG00000065423	Mir181a-2	Mirn181|Mirn181a|Mirn181a-2|miR-181|mir-181a|mir-181a-2	microRNA 181a-2	ncRNA
upeaks-10053	chr12	75616853	75617192	+	0	NA	Intergenic	Intergenic	14727	NR_038063	665931	Mm.341719	NR_038063		Rplp2-ps1	Gm7852	ribosomal protein, large P2, pseudogene 1	pseudo
upeaks-37414	chr6	67105578	67105786	+	0	NA	Intergenic	MLT1C|LTR|ERVL-MaLR	-68275	NM_007836	13197	Mm.72235	NM_007836	ENSMUSG00000036390	Gadd45a	AA545191|Ddit1|GADD45	growth arrest and DNA-damage-inducible 45 alpha	protein-coding
upeaks-14848	chr14	101768836	101769044	+	0	NA	intron (NM_201529, intron 1 of 30)	intron (NM_201529, intron 1 of 30)	39012	NM_201529	380928	Mm.218981	NM_201529	ENSMUSG00000033060	Lmo7	C78582|FBXO20|Gm914|mKIAA0858	LIM domain only 7	protein-coding
upeaks-41771	chr7	130113354	130113576	+	0	NA	Intergenic	Intergenic	151300	NR_046077	100043150	Mm.334264	NR_046077	ENSMUSG00000108504	Gm4265	-	predicted gene 4265	ncRNA
upeaks-40534	chr7	74416992	74417381	+	0	NA	intron (NM_001038643, intron 2 of 10)	intron (NM_001038643, intron 2 of 10)	137594	NM_001038643	108116	Mm.425467	NM_023908	ENSMUSG00000025790	Slco3a1	5830414C08Rik|Anr1|MJAM|OATP-D|R75096|Slc21a11	solute carrier organic anion transporter family, member 3a1	protein-coding
upeaks-13986	chr14	46582998	46583612	+	0	NA	Intergenic	MIRc|SINE|MIR	-7454	NR_046459	100873094	Mm.318596	NR_046459		Rubie	-	RNA upstream of Bmp4 expressed in inner ear	ncRNA
upeaks-26242	chr2	137210847	137211242	+	0	NA	Intergenic	Intergenic	-94524	NM_013822	16449	Mm.22398	NM_013822	ENSMUSG00000027276	Jag1	ABE2|Gsfabe2|Htu|Ozz|Ser-1	jagged 1	protein-coding
upeaks-29112	chr3	103113943	103114218	+	0	NA	Intergenic	Intergenic	-13476	NM_177857	329727	Mm.293641	NM_177857	ENSMUSG00000007379	Dennd2c	A930010I20Rik	DENN/MADD domain containing 2C	protein-coding
upeaks-15504	chr15	33596415	33596983	+	0	NA	intron (NR_045070, intron 5 of 5)	intron (NR_045070, intron 5 of 5)	56737	NR_045070	75880	Mm.396109	NR_045070		4930592A05Rik	-	RIKEN cDNA 4930592A05 gene	ncRNA
upeaks-44165	chr8	108762563	108763013	+	0	NA	intron (NM_007496, intron 1 of 9)	intron (NM_007496, intron 1 of 9)	48144	NM_007496	11906	Mm.416972	NM_007496	ENSMUSG00000038872	Zfhx3	A230102L03Rik|Atbf1|Sci|WBP9|mKIAA4228	zinc finger homeobox 3	protein-coding
upeaks-15153	chr14	122256284	122256528	+	0	NA	intron (NM_029556, intron 1 of 7)	intron (NM_029556, intron 1 of 7)	-22768	NR_015532	68245	Mm.443285	NR_015532	ENSMUSG00000100585	1700108J01Rik	-	RIKEN cDNA 1700108J01 gene	ncRNA
upeaks-918	chr1	73948659	73949327	+	0	NA	intron (NM_027884, intron 19 of 34)	intron (NM_027884, intron 19 of 34)	-84527	NR_045311	109198	Mm.359721	NR_045311	ENSMUSG00000100301	6030407O03Rik	-	RIKEN cDNA 6030407O03 gene	ncRNA
upeaks-5272	chr10	108155542	108155741	+	0	NA	Intergenic	MLT1E3|LTR|ERVL-MaLR	-6759	NM_027892	17931	Mm.422959	NM_027892	ENSMUSG00000019907	Ppp1r12a	1200015F06Rik|5730577I22Rik|AA792106|AV099298|D10Ertd625e|Mypt1	protein phosphatase 1, regulatory (inhibitor) subunit 12A	protein-coding
upeaks-9606	chr12	35838711	35838998	+	0	NA	Intergenic	MLTR11A|LTR|ERVK	-86767	NM_207531	403205	Mm.190508	NM_207531	ENSMUSG00000036231	Agr3	BCMP11|E030025L21Rik|Gm888	anterior gradient 3	protein-coding
upeaks-45173	chr9	28084287	28084576	+	0	NA	intron (NM_177906, intron 1 of 7)	intron (NM_177906, intron 1 of 7)	293162	NM_177906	330908	Mm.379474	NM_177906	ENSMUSG00000062257	Opcml	2900075O15Rik|3732419F12|AI844366|B930023M13Rik|C230027C17|Gm181|Obcam	opioid binding protein/cell adhesion molecule-like	protein-coding
upeaks-23343	chr19	55262064	55262264	+	0	NA	intron (NM_027976, intron 1 of 21)	PB1|SINE|Alu	8795	NM_027976	433256	Mm.292056	NM_027976	ENSMUSG00000024981	Acsl5	1700030F05Rik|ACS2|ACS5|Facl5	acyl-CoA synthetase long-chain family member 5	protein-coding
upeaks-36908	chr6	35354754	35354993	+	0	NA	Intergenic	Intergenic	24027	NR_040526	73409	Mm.69443	NR_040526	ENSMUSG00000107341	1700065J11Rik	-	RIKEN cDNA 1700065J11 gene	ncRNA
upeaks-14525	chr14	70653612	70653814	+	0	NA	promoter-TSS (NM_181345)	promoter-TSS (NM_181345)	-629	NM_181345	328440	Mm.347749	NM_181345	ENSMUSG00000047911	Npm2	-	nucleophosmin/nucleoplasmin 2	protein-coding
upeaks-5323	chr10	110617048	110617272	+	0	NA	Intergenic	Intergenic	16510	NR_028438	109335	Mm.367727	NR_028438		9230102K24Rik	-	RIKEN cDNA 9230102K24 gene	ncRNA
upeaks-41946	chr7	138366980	138367238	+	0	NA	intron (NM_183289, intron 3 of 11)	intron (NM_183289, intron 3 of 11)	30621	NM_183289	70571	Mm.334297	NM_183289	ENSMUSG00000091002	Tcerg1l	5730476P14Rik	transcription elongation regulator 1-like	protein-coding
upeaks-11059	chr12	119170610	119171002	+	0	NA	exon (NM_177290, exon 10 of 14)	exon (NM_177290, exon 10 of 14)	67470	NM_177290	320910	Mm.217000	NM_177290	ENSMUSG00000025321	Itgb8	4832412O06Rik	integrin beta 8	protein-coding
upeaks-3153	chr1	189921284	189921568	+	0	NA	intron (NM_026796, intron 1 of 11)	intron (NM_026796, intron 1 of 11)	862	NM_026796	226830	Mm.156895	NM_026796	ENSMUSG00000026603	Smyd2	1110020E07Rik|4930402C15|KMT3C|Zmynd14	SET and MYND domain containing 2	protein-coding
upeaks-29411	chr3	116859324	116859523	+	0	NA	promoter-TSS (NM_001113478)	promoter-TSS (NM_001113478)	-144	NM_001113478	20321	Mm.66293	NM_009146	ENSMUSG00000033386	Frrs1	AI131732|Sdfr2	ferric-chelate reductase 1	protein-coding
upeaks-7811	chr11	86646537	86646818	+	0	NA	intron (NM_029478, intron 5 of 11)	intron (NM_029478, intron 5 of 11)	-9394	NR_106195	102465902		NR_106195	ENSMUSG00000099324	Mir8115	Gm28012|mmu-mir-8115	microRNA 8115	ncRNA
upeaks-35459	chr5	120221483	120221732	+	0	NA	Intergenic	Intergenic	-82344	NR_045793	100503427	Mm.446834	NR_045793	ENSMUSG00000097368	Gm10390	ENSMUSG00000072671	predicted gene 10390	ncRNA
upeaks-46570	chr9	92374910	92375286	+	0	NA	Intergenic	Intergenic	65721	NM_001033184	78459	Mm.179195	NM_001033184	ENSMUSG00000074139	1700057G04Rik	-	RIKEN cDNA 1700057G04 gene	protein-coding
upeaks-27638	chr3	14993973	14994193	+	0	NA	intron (NR_040550, intron 3 of 3)	RLTR41|LTR|ERV1	22882	NR_040550	77127	Mm.195792	NR_040549	ENSMUSG00000098008	A930001A20Rik	-	RIKEN cDNA A930001A20 gene	ncRNA
upeaks-29573	chr3	125403803	125404434	+	0	NA	promoter-TSS (NM_022565)	promoter-TSS (NM_022565)	27	NM_022565	64580	Mm.444289	NM_022565	ENSMUSG00000027971	Ndst4	4930439H17Rik	N-deacetylase/N-sulfotransferase (heparin glucosaminyl) 4	protein-coding
upeaks-40576	chr7	76438495	76438897	+	0	NA	intron (NM_001199224, intron 16 of 22)	intron (NM_001199224, intron 16 of 22)	208809	NM_001199224	244071	Mm.322829	NM_172902	ENSMUSG00000025754	Agbl1	Ccp4|D430020F16|EG244071|Nna1-l1	ATP/GTP binding protein-like 1	protein-coding
upeaks-20371	chr17	78024007	78024493	+	0	NA	Intergenic	Intergenic	-175998	NM_015800	50766	Mm.311912	NM_015800	ENSMUSG00000024074	Crim1	AU015004	cysteine rich transmembrane BMP regulator 1 (chordin like)	protein-coding
upeaks-28061	chr3	51724621	51724889	+	0	NA	intron (NM_001004176, intron 2 of 4)	PB1D10|SINE|Alu	63576	NM_174995	211666	Mm.24679	NM_174995	ENSMUSG00000074604	Mgst2	GST2|MGST-II	microsomal glutathione S-transferase 2	protein-coding
upeaks-18375	chr16	85041530	85041861	+	0	NA	intron (NM_001198826, intron 7 of 16)	intron (NM_001198826, intron 7 of 16)	69484	NR_045889	100038614	Mm.441351	NR_045889		Gm10791	ENSMUSG00000074933	predicted gene 10791	ncRNA
upeaks-6197	chr11	20452157	20452379	+	0	NA	Intergenic	PB1|SINE|Alu	-90985	NM_021372	58172	Mm.339676	NM_021372	ENSMUSG00000049800	Sertad2	AB041541|AU021878|Kiaa0127|MNCb-1504|SEI-2|Sei2|TRIP-Br2|mKIAA0127	SERTA domain containing 2	protein-coding
upeaks-4462	chr10	74919339	74919569	+	0	NA	Intergenic	RLTR30E_MM|LTR|ERV1	-47777	NM_010311	14687	Mm.32595	NM_010311	ENSMUSG00000040009	Gnaz	AI847979|Gz	guanine nucleotide binding protein, alpha z subunit	protein-coding
upeaks-26345	chr2	142513491	142513700	+	0	NA	Intergenic	Intergenic	387869	NM_001081133	16558	Mm.251934	NM_001081133	ENSMUSG00000038844	Kif16b	8430434E15Rik|AA623607|AI789011|C80253|C80902|mKIAA1590	kinesin family member 16B	protein-coding
upeaks-13037	chr13	108841919	108842174	+	0	NA	intron (NM_011056, intron 1 of 16)	intron (NM_011056, intron 1 of 16)	187869	NM_011056	238871	Mm.434429	NM_011056	ENSMUSG00000021699	Pde4d	9630011N22Rik|Dpde3	phosphodiesterase 4D, cAMP specific	protein-coding
upeaks-25180	chr2	89648729	89649003	+	0	NA	Intergenic	RLTR13A1|LTR|ERVK	8573	NM_146965	258967	Mm.358935	NM_146965	ENSMUSG00000075078	Olfr1250	MOR231-7	olfactory receptor 1250	protein-coding
upeaks-39157	chr6	147145224	147145727	+	0	NA	Intergenic	Intergenic	-34766	NR_033640	100039641	Mm.170402	NR_033640	ENSMUSG00000085600	E330012B07Rik	Gm15768|OTTMUSG00000026071	RIKEN cDNA E330012B07 gene	ncRNA
upeaks-48346	chrX	166199885	166200117	+	0	NA	Intergenic	Intergenic	29547	NM_146238	237221	Mm.209490	NM_146238	ENSMUSG00000040621	Gemin8	B130034M20Rik|B930082C09Rik|BC023488|gemin-8	gem (nuclear organelle) associated protein 8	protein-coding
upeaks-7139	chr11	64562851	64563167	+	0	NA	Intergenic	Intergenic	-126335	NR_028445	654805	Mm.436132	NR_028445		F930015N05Rik	-	RIKEN cDNA F930015N05 gene	ncRNA
upeaks-9344	chr12	17239365	17239598	+	0	NA	Intergenic	B1F|SINE|Alu	-27114	NM_027959	71853	Mm.222825	NM_027959	ENSMUSG00000020571	Pdia6	1700015E05Rik|AL023058|C77895|CaBP5|P5|Txndc7	protein disulfide isomerase associated 6	protein-coding
upeaks-30026	chr3	145729693	145730409	+	0	NA	Intergenic	Intergenic	-28641	NM_026993	69219	Mm.234247	NM_026993	ENSMUSG00000028194	Ddah1	2410006N07Rik|2510015N06Rik|AI987801|AW050362	dimethylarginine dimethylaminohydrolase 1	protein-coding
upeaks-29118	chr3	103363545	103363746	+	0	NA	Intergenic	B4|SINE|B4	84352	NM_001079830	94093	Mm.195036	NM_053170	ENSMUSG00000033014	Trim33	8030451N04Rik|AI413936|Ecto|Tif1g	tripartite motif-containing 33	protein-coding
upeaks-29517	chr3	122313914	122314335	+	0	NA	Intergenic	Intergenic	-20421	NR_030439	791077		NR_030439	ENSMUSG00000076456	Mir760	Mirn760|mir-760|mmu-mir-760	microRNA 760	ncRNA
upeaks-5302	chr10	109480352	109480647	+	0	NA	Intergenic	RMER13B|LTR|ERVK	-469524	NM_001252342	20979	Mm.289702	NM_009306	ENSMUSG00000035864	Syt1	AW124717|G630098F17Rik|SytI	synaptotagmin I	protein-coding
upeaks-33736	chr5	23988967	23989166	+	0	NA	intron (NM_001310471, intron 3 of 10)	B1_Mur4|SINE|Alu	41246	NM_001310471	84652	Mm.304976	NM_053090	ENSMUSG00000028995	Fam126a	AB030242|Drctnnb1a	family with sequence similarity 126, member A	protein-coding
upeaks-26027	chr2	129258882	129259081	+	0	NA	Intergenic	Intergenic	38231	NM_181589	70466	Mm.45785	NM_181589	ENSMUSG00000048327	Ckap2l	2010016H04Rik|2610318C08Rik|AV070319|radmis|rdm	cytoskeleton associated protein 2-like	protein-coding
upeaks-13081	chr13	110929607	110929947	+	0	NA	Intergenic	Intergenic	-25931	NR_131194	102636142	Mm.417611	NR_131194		4930526H09Rik	-	RIKEN cDNA 4930526H09 gene	ncRNA
upeaks-25627	chr2	114123389	114123687	+	0	NA	intron (NM_001290788, intron 23 of 33)	intron (NM_001290788, intron 23 of 33)	27032	NR_105968	102465982		NR_105968	ENSMUSG00000098464	Mir7002	Gm27429|mmu-mir-7002	microRNA 7002	ncRNA
upeaks-9481	chr12	29000139	29000340	+	0	NA	Intergenic	Intergenic	248411	NM_201357	380752	Mm.273724	NM_201357	ENSMUSG00000036613	Tssc1	D12Ertd604e|Eipr1	tumor suppressing subtransferable candidate 1	protein-coding
upeaks-5064	chr10	95142782	95143155	+	0	NA	intron (NR_131146, intron 2 of 3)	intron (NR_131146, intron 2 of 3)	2857	NR_131146	628062		NR_131146		Gm29684	-	predicted gene, 29684	ncRNA
upeaks-6608	chr11	43976208	43976418	+	0	NA	Intergenic	Lx5b|LINE|L1	-75076	NM_001284380	11548	Mm.39086	NM_007416	ENSMUSG00000050541	Adra1b	[a]1b	adrenergic receptor, alpha 1b	protein-coding
upeaks-40766	chr7	84254369	84254627	+	0	NA	intron (NM_007488, intron 17 of 18)	intron (NM_007488, intron 17 of 18)	-102605	NM_133722	70178	Mm.23914	NM_133722	ENSMUSG00000038459	Abhd17c	2210412D01Rik|AL023007|Fam108c|Fam108c1	abhydrolase domain containing 17C	protein-coding
upeaks-11311	chr13	19372195	19372686	+	0	NA	intron (NM_001347485, intron 4 of 7)	intron (NM_001347485, intron 4 of 7)	23373	NM_001347485	76205	Mm.41940	NM_024270	ENSMUSG00000003062	Stard3nl	0610035N01Rik|6530409L22Rik|AW124774|MENTHO	STARD3 N-terminal like	protein-coding
upeaks-6910	chr11	57655011	57655242	+	0	NA	intron (NM_134189, intron 1 of 11)	Lx8|LINE|L1	9684	NM_134189	171212	Mm.271670	NM_134189	ENSMUSG00000020520	Galnt10	AU018154|C330012K04Rik|GalNAc-T10|GalNAc-T9|Galnt9|ppGaNTase	UDP-N-acetyl-alpha-D-galactosamine:polypeptide N-acetylgalactosaminyltransferase 10	protein-coding
upeaks-29430	chr3	117916199	117916459	+	0	NA	Intergenic	Intergenic	-47393	NM_001190156	76561	Mm.33824	NM_029655	ENSMUSG00000028007	Snx7	2510028H01Rik	sorting nexin 7	protein-coding
upeaks-18487	chr16	90437173	90437762	+	0	NA	intron (NM_015755, intron 2 of 10)	intron (NM_015755, intron 2 of 10)	51070	NM_015755	26559	Mm.125874	NM_015755	ENSMUSG00000053414	Hunk	Bstk1|Mak-v	hormonally upregulated Neu-associated kinase	protein-coding
upeaks-45175	chr9	28261320	28261631	+	0	NA	intron (NM_177906, intron 1 of 7)	intron (NM_177906, intron 1 of 7)	470206	NM_177906	330908	Mm.379474	NM_177906	ENSMUSG00000062257	Opcml	2900075O15Rik|3732419F12|AI844366|B930023M13Rik|C230027C17|Gm181|Obcam	opioid binding protein/cell adhesion molecule-like	protein-coding
upeaks-34859	chr5	99251422	99251716	+	0	NA	intron (NM_145839, intron 1 of 13)	intron (NM_145839, intron 1 of 13)	1358	NM_181318	320292	Mm.259074	NM_145839	ENSMUSG00000089809	Rasgef1b	4732452O09Rik|GPIgamma4|Gpig4	RasGEF domain family, member 1B	protein-coding
upeaks-35704	chr5	128282900	128283165	+	0	NA	intron (NM_172885, intron 1 of 8)	intron (NM_172885, intron 1 of 8)	150045	NM_172885	243274	Mm.447698	NM_172885	ENSMUSG00000034310	Tmem132d	C630028F04Rik	transmembrane protein 132D	protein-coding
upeaks-6184	chr11	20007819	20008022	+	0	NA	intron (NM_033523, intron 3 of 5)	intron (NM_033523, intron 3 of 5)	83478	NM_033523	114716	Mm.266627	NM_033523	ENSMUSG00000045671	Spred2	C79158	sprouty-related, EVH1 domain containing 2	protein-coding
upeaks-821	chr1	68501572	68501918	+	0	NA	intron (NM_010154, intron 3 of 26)	intron (NM_010154, intron 3 of 26)	606314	NM_010154	13869	Mm.442420	NM_010154	ENSMUSG00000062209	Erbb4	Her4|c-erbB-4	erb-b2 receptor tyrosine kinase 4	protein-coding
upeaks-29193	chr3	105543491	105543690	+	0	NA	intron (NM_001039347, intron 2 of 6)	intron (NM_001039347, intron 2 of 6)	84774	NM_019931	56543	Mm.44530	NM_019931	ENSMUSG00000040896	Kcnd3	AW045978|Kncd3|Kv4.3	potassium voltage-gated channel, Shal-related family, member 3	protein-coding
upeaks-1608	chr1	118878078	118878649	+	0	NA	intron (NM_001081125, intron 3 of 13)	intron (NM_001081125, intron 3 of 13)	-75857	NR_105764	102465176		NR_105764	ENSMUSG00000098273	Mir6346	Gm27829|mmu-mir-6346	microRNA 6346	ncRNA
upeaks-27971	chr3	41182306	41182642	+	0	NA	Intergenic	Intergenic	-99428	NM_027558	70804	Mm.40321	NM_027558	ENSMUSG00000049940	Pgrmc2	4631434O19Rik|5730409G06Rik|DG6|PMBP	progesterone receptor membrane component 2	protein-coding
upeaks-15908	chr15	62496103	62496550	+	0	NA	Intergenic	Intergenic	-276875	NR_003523	67552	Mm.484027	NM_026230		H2afy3	4933432H23Rik	H2A histone family, member Y3	pseudo
upeaks-45579	chr9	48161824	48162101	+	0	NA	Intergenic	LTR67B|LTR|ERVL	178936	NM_030069	78252	Mm.31626	NM_030069	ENSMUSG00000032028	Nxpe2	4432416J03Rik|AI323362|Fam55b	neurexophilin and PC-esterase domain family, member 2	protein-coding
upeaks-24274	chr2	33684213	33684436	+	0	NA	Intergenic	PB1|SINE|Alu	43131	NR_046275	100504399	Mm.72070	NM_177842		C130021I20Rik	-	Riken cDNA C130021I20 gene	ncRNA
upeaks-47234	chr9	119082162	119082372	+	0	NA	intron (NR_121571, intron 2 of 14)	intron (NR_121571, intron 2 of 14)	5994	NM_001293648	18799	Mm.23963	NM_019676	ENSMUSG00000010660	Plcd1	AW212592|C79986	phospholipase C, delta 1	protein-coding
upeaks-45152	chr9	26783545	26783939	+	0	NA	intron (NM_001310768, intron 5 of 18)	Lx8|LINE|L1	22675	NM_153803	244757	Mm.293696	NM_153803	ENSMUSG00000036395	Glb1l2	-	galactosidase, beta 1-like 2	protein-coding
upeaks-7179	chr11	66905924	66906258	+	0	NA	intron (NR_033539, intron 3 of 3)	intron (NR_033539, intron 3 of 3)	-5900	NM_178656	193003	Mm.440256	NM_178656	ENSMUSG00000048070	Pirt	A530088H08Rik	phosphoinositide-interacting regulator of transient receptor potential channels	protein-coding
upeaks-1481	chr1	102825120	102825331	+	0	NA	Intergenic	Intergenic	1669457	NR_037989	100504525	Mm.87065	NR_037989	ENSMUSG00000100684	Gm20268	-	predicted gene, 20268	ncRNA
upeaks-42727	chr8	32530900	32531116	+	0	NA	Intergenic	(CAATA)n|Simple_repeat|Simple_repeat	379113	NR_046039	666589	Mm.367675	NR_046039		Gm8179	EG666589	predicted gene 8179	ncRNA
upeaks-36505	chr6	6874205	6874731	+	0	NA	Intergenic	Intergenic	-4935	NR_015388	320038	Mm.94021	NR_015388		Dlx6os1	A230055N17Rik|Dlx6as1|Evf-1|Evf-2|Evf1|Evf1/2|Evf2|Shhrs|mEvf-1	distal-less homeobox 6, opposite strand 1	ncRNA
upeaks-9351	chr12	17505928	17506316	+	0	NA	Intergenic	Intergenic	-38751	NM_013614	18263	Mm.34102	NM_013614	ENSMUSG00000011179	Odc1	ODC	ornithine decarboxylase, structural 1	protein-coding
upeaks-729	chr1	60998702	60998901	+	0	NA	3' UTR (NM_017480, exon 5 of 5)	3' UTR (NM_017480, exon 5 of 5)	20887	NM_017480	54167	Mm.42044	NM_017480	ENSMUSG00000026009	Icos	AILIM|CCLP|CRP-1|H4|Ly115	inducible T cell co-stimulator	protein-coding
upeaks-1305	chr1	90225658	90225961	+	0	NA	Intergenic	Intergenic	21829	NM_001271607	12778	Mm.6522	NM_007722	ENSMUSG00000044337	Ackr3	AW541270|CXC-R7|CXCR-7|Cmkor1|Cxcr7|RDC-1|Rdc1	atypical chemokine receptor 3	protein-coding
upeaks-5653	chr10	124149344	124149551	+	0	NA	Intergenic	Intergenic	-319627	NR_028310	75030	Mm.159403	NR_028310		4930503E24Rik	-	eukaryotic translation initiation factor 3, subunit I pseudogene	pseudo
upeaks-37216	chr6	52273576	52273775	+	0	NA	Intergenic	Intergenic	10900	NR_110441	791364	Mm.97466	NR_110441	ENSMUSG00000055408	Hottip	ENSMUSG00000055408|Gm15053|OTTMUSG00000018874	Hoxa distal transcript antisense RNA	ncRNA
upeaks-15877	chr15	60719397	60719675	+	0	NA	Intergenic	RMER19B|LTR|ERVK	-103429	NR_030696	320469	Mm.230853	NM_177166		9930014A18Rik	-	RIKEN cDNA 9930014A18 gene	ncRNA
upeaks-38164	chr6	104078053	104078376	+	0	NA	Intergenic	RLTR26_Mus|LTR|ERVK	-113530	NR_144494	100846987		NR_144494		Pou5f1-rs5	Gm21054|Oct4P5|Otf3-rs5|Otf3e	POU domain, class 5, transcription factor 1, related sequence 5	pseudo
upeaks-9756	chr12	52692334	52692601	+	0	NA	Intergenic	Intergenic	-6916	NM_198111	238161	Mm.310822	NM_198111	ENSMUSG00000061603	Akap6	AI482140|Akapalpha|Akapbeta|PRKA	A kinase (PRKA) anchor protein 6	protein-coding
upeaks-25621	chr2	114046507	114046790	+	0	NA	TTS (NM_009608)	TTS (NM_009608)	6227	NM_009608	11464	Mm.686	NM_009608	ENSMUSG00000068614	Actc1	Actc-1	actin, alpha, cardiac muscle 1	protein-coding
upeaks-9783	chr12	54316919	54317337	+	0	NA	Intergenic	Intergenic	74190	NR_033689	665239	Mm.26856	NR_033689		Gm7550	EG665239|Gm666	predicted gene 7550	ncRNA
upeaks-21800	chr18	67890663	67890912	+	0	NA	Intergenic	MLTR14|LTR|ERV1	-42470	NM_172631	52662	Mm.440183	NM_172631	ENSMUSG00000024544	Ldlrad4	8230401C20Rik|A430083H02|A430108L08Rik|C18orf1|D18Ertd653e|D330030L18Rik	low density lipoprotein receptor class A domain containing 4	protein-coding
upeaks-10030	chr12	73788853	73789281	+	0	NA	Intergenic	Intergenic	-112257	NM_001313920	15251	Mm.3879	NM_010431	ENSMUSG00000021109	Hif1a	AA959795|HIF-1-alpha|HIF1-alpha|HIF1alpha|MOP1|bHLHe78	hypoxia inducible factor 1, alpha subunit	protein-coding
upeaks-15191	chr14	124264592	124265024	+	0	NA	intron (NM_207667, intron 1 of 4)	intron (NM_207667, intron 1 of 4)	-72262	NM_010201	14169	Mm.206362	NM_010201	ENSMUSG00000025551	Fgf14	FHF-4|Fhf4|mFHF-4(1B)	fibroblast growth factor 14	protein-coding
upeaks-24859	chr2	70443032	70443395	+	0	NA	Intergenic	Intergenic	-31710	NM_022435	64406	Mm.423397	NM_022435	ENSMUSG00000075304	Sp5	-	trans-acting transcription factor 5	protein-coding
upeaks-26731	chr2	155923843	155924053	+	0	NA	intron (NR_024487, intron 1 of 9)	B1_Mm|SINE|Alu	6362	NM_018888	56046	Mm.158827	NM_018888	ENSMUSG00000005882	Uqcc1	2310079L17Rik|2410003P15Rik|3110038N19Rik|Bfzb|Bfzp|Cbp3|Uqcc	ubiquinol-cytochrome c reductase complex assembly factor 1	protein-coding
upeaks-15887	chr15	61442657	61442977	+	0	NA	Intergenic	Intergenic	331634	NR_040350	432956	Mm.404918	NR_040350		D030024E09Rik	-	RIKEN cDNA D030024E09 gene	ncRNA
upeaks-9323	chr12	16665102	16665301	+	0	NA	Intergenic	RMER17B|LTR|ERVK	11731	NM_008747	18217	Mm.281715	NM_008747	ENSMUSG00000020591	Ntsr2	NT2R|NTRL	neurotensin receptor 2	protein-coding
upeaks-16841	chr15	98144979	98145830	+	0	NA	intron (NM_001170711, intron 1 of 3)	CpG	298	NM_001170710	78541	Mm.200766	NM_030121	ENSMUSG00000048175	Asb8	4930539L19Rik|AI788835|C430011H06Rik	ankyrin repeat and SOCS box-containing 8	protein-coding
upeaks-37432	chr6	69516253	69516499	+	0	NA	Intergenic	7SLRNA|srpRNA|srpRNA	-189202	NR_004434	19783		NR_004434	ENSMUSG00000106222	Rprl1	Rmrp2|Rpr|Rprh2	ribonuclease P RNA-like 1	ncRNA
upeaks-23729	chr2	17917593	17917854	+	0	NA	Intergenic	MLT1F1|LTR|ERVL-MaLR	79235	NM_026627	68231	Mm.23887	NM_026627	ENSMUSG00000062651	H2afb1	1700113O17Rik|H2A.Bbd|H2al2|TSEG-1|Tseg1	H2A histone family, member B1	protein-coding
upeaks-3727	chr10	28086016	28086266	+	0	NA	intron (NM_008983, intron 1 of 31)	RLTR51B_Mm|LTR|ERVK?	11321	NM_008983	19272	Mm.332303	NM_008983	ENSMUSG00000019889	Ptprk	AI853699|PTPk|RPTPkappa	protein tyrosine phosphatase, receptor type, K	protein-coding
upeaks-25943	chr2	126270027	126270353	+	0	NA	Intergenic	Lx3A|LINE|L1	118049	NM_026981	69185	Mm.29019	NM_026981	ENSMUSG00000023330	Dtwd1	1810033A06Rik	DTW domain containing 1	protein-coding
upeaks-2816	chr1	176675183	176675515	+	0	NA	Intergenic	Intergenic	97074	NR_029775	723921		NR_029775	ENSMUSG00000065573	Mir350	Mirn350|mir-350|mmu-mir-350	microRNA 350	ncRNA
upeaks-21872	chr18	72890270	72890657	+	0	NA	Intergenic	Intergenic	-539394	NM_007831	13176	Mm.167882	NM_007831	ENSMUSG00000060534	Dcc	C030036D22Rik|Igdcc1	deleted in colorectal carcinoma	protein-coding
upeaks-675	chr1	58586516	58586772	+	0	NA	promoter-TSS (NM_172513)	promoter-TSS (NM_172513)	247	NM_025597	66495	Mm.2033	NM_025597	ENSMUSG00000026032	Ndufb3	2700033I16Rik|CI-B12	NADH dehydrogenase (ubiquinone) 1 beta subcomplex 3	protein-coding
upeaks-29433	chr3	118111407	118111613	+	0	NA	Intergenic	(GAATG)n|Simple_repeat|Simple_repeat	-242574	NM_001190156	76561	Mm.33824	NM_029655	ENSMUSG00000028007	Snx7	2510028H01Rik	sorting nexin 7	protein-coding
upeaks-41762	chr7	129783728	129784011	+	0	NA	Intergenic	Intergenic	-178296	NR_046077	100043150	Mm.334264	NR_046077	ENSMUSG00000108504	Gm4265	-	predicted gene 4265	ncRNA
upeaks-43546	chr8	82121091	82121387	+	0	NA	exon (NM_001297591, exon 25 of 25)	exon (NM_001297591, exon 25 of 25)	281347	NM_008357	16168	Mm.4392	NM_008357	ENSMUSG00000031712	Il15	AI503618|IL-15	interleukin 15	protein-coding
upeaks-11024	chr12	118078500	118079134	+	0	NA	intron (NM_010060, intron 30 of 81)	intron (NM_010060, intron 30 of 81)	120226	NM_010060	13411	Mm.390540	NM_010060	ENSMUSG00000018581	Dnah11	Dnahc11|b2b1203Clo|b2b1279Clo|b2b1289Clo|b2b1727Clo|b2b598Clo|iv|lrd	dynein, axonemal, heavy chain 11	protein-coding
upeaks-10303	chr12	84746379	84746625	+	0	NA	Intergenic	Intergenic	26610	NM_023409	67963	Mm.282556	NM_023409	ENSMUSG00000021242	Npc2	2700012J19Rik|AA408070|AU045843|HE1	Niemann-Pick type C2	protein-coding
upeaks-2791	chr1	175431428	175431700	+	0	NA	intron (NM_001347195, intron 2 of 17)	intron (NM_001347195, intron 2 of 17)	60981	NM_001347195	24012	Mm.7956	NM_011880	ENSMUSG00000026527	Rgs7	-	regulator of G protein signaling 7	protein-coding
upeaks-3752	chr10	29646215	29646414	+	0	NA	Intergenic	Intergenic	-110447	NM_028351	72780	Mm.45191	NM_028351	ENSMUSG00000019880	Rspo3	2810459H04Rik|AW742308|Cristin1|Thsd2	R-spondin 3	protein-coding
upeaks-40322	chr7	63796070	63796570	+	0	NA	Intergenic	RLTR19-int|LTR|ERVK	-120537	NM_001256311	381994	Mm.425466	NM_001256311	ENSMUSG00000095061	E030018B13Rik	Gm1697	RIKEN cDNA E030018B13 gene	protein-coding
upeaks-23588	chr2	7645492	7645864	+	0	NA	Intergenic	Lx|LINE|L1	-249480	NM_001110231	14007	Mm.398543	NM_010160	ENSMUSG00000002107	Celf2	B230218O03|B230345P09Rik|C88023|CELF-2|CUG-BP2|Cugbp2|D230046B21Rik|Etr-3|Napor|Napor-2|mETR-3	CUGBP, Elav-like family member 2	protein-coding
upeaks-6529	chr11	36605061	36605332	+	0	NA	intron (NM_011856, intron 2 of 28)	intron (NM_011856, intron 2 of 28)	339045	NM_001290702	23964	Mm.439889	NM_011856	ENSMUSG00000049336	Tenm2	Odz2|Odz3|Ten-2|Ten-m2	teneurin transmembrane protein 2	protein-coding
upeaks-9704	chr12	46405735	46406027	+	0	NA	Intergenic	RMER1A|Other|Other	412894	NM_021361	664883	Mm.247195	NM_021361	ENSMUSG00000021047	Nova1	9430099M15Rik|G630039L02|Nova-1	neuro-oncological ventral antigen 1	protein-coding
upeaks-14865	chr14	102825479	102825927	+	0	NA	Intergenic	Intergenic	156929	NR_039592	100628599		NR_039592	ENSMUSG00000092901	Mir5130	mir-5130|mmu-mir-5130|mu-mir-5130	microRNA 5130	ncRNA
upeaks-46428	chr9	85178888	85179128	+	0	NA	Intergenic	Lx3A|LINE|L1	148116	NM_001160378	212943	Mm.74610	NM_001160378	ENSMUSG00000032265	Fam46a	BAP014|D930050G01Rik	family with sequence similarity 46, member A	protein-coding
upeaks-24622	chr2	57945686	57946131	+	0	NA	Intergenic	L1_Mus3|LINE|L1	-52247	NM_172855	241391	Mm.484118	NM_172855	ENSMUSG00000026828	Galnt5	4832424J23	UDP-N-acetyl-alpha-D-galactosamine:polypeptide N-acetylgalactosaminyltransferase 5	protein-coding
upeaks-19916	chr17	51343447	51343710	+	0	NA	intron (NR_037250, intron 3 of 4)	Lx2|LINE|L1	65590	NR_037251	100526483		NR_037251	ENSMUSG00000104734	Mir669a-5	mmu-mir-669a-5	microRNA 669a-5	ncRNA
upeaks-29053	chr3	101212070	101212446	+	0	NA	Intergenic	Intergenic	75681	NM_013486	12481	Mm.22842	NM_013486	ENSMUSG00000027863	Cd2	LFA-2|Ly-37|Ly37	CD2 antigen	protein-coding
upeaks-2127	chr1	144055500	144056226	+	0	NA	Intergenic	Intergenic	-51714	NM_009061	19735	Mm.28262	NM_009061	ENSMUSG00000026360	Rgs2	GOS8	regulator of G-protein signaling 2	protein-coding
upeaks-26447	chr2	146139288	146139587	+	0	NA	Intergenic	IAPEz-int|LTR|ERVK	-82560	NM_016889	53626	Mm.379070	NM_016889	ENSMUSG00000068154	Insm1	IA-1	insulinoma-associated 1	protein-coding
upeaks-28233	chr3	61540960	61541334	+	0	NA	Intergenic	Lx2|LINE|L1	176640	NM_028712	74012	Mm.422674	NM_028712	ENSMUSG00000036894	Rap2b	4021402C18Rik|AA408554	RAP2B, member of RAS oncogene family	protein-coding
upeaks-33117	chr4	147305490	147305737	+	0	NA	intron (NM_001039209, intron 1 of 2)	intron (NM_001039209, intron 1 of 2)	129747	NM_001039209	195531	Mm.270762	NM_001039209	ENSMUSG00000078496	Zfp982	Gm13152|OTTMUSG00000010671	zinc finger protein 982	protein-coding
upeaks-23594	chr2	9524195	9524437	+	0	NA	Intergenic	Intergenic	334801	NR_038180	73438	Mm.23558	NR_038180	ENSMUSG00000085580	1700061F12Rik	-	RIKEN cDNA 1700061F12 gene	ncRNA
upeaks-41083	chr7	101390885	101391146	+	0	NA	intron (NM_001040112, intron 9 of 30)	intron (NM_001040112, intron 9 of 30)	-3373	NM_198096	69710	Mm.277687	NM_027180	ENSMUSG00000032812	Arap1	2410002L19Rik|Centd2|mKIAA0782	ArfGAP with RhoGAP domain, ankyrin repeat and PH domain 1	protein-coding
upeaks-44860	chr9	7903272	7903597	+	0	NA	Intergenic	ORR1E|LTR|ERVL-MaLR	-30264	NM_007464	11796	Mm.2026	NM_007464	ENSMUSG00000032000	Birc3	AW107670|Api1|Api2|Birc2|C-IAP2|HIAP2|IAP1|IAP2|MIAP1|MIAP2|MIHB|MIHC|RNF49|cIAP-1|cIAP-2|cIAP1|cIAP2	baculoviral IAP repeat-containing 3	protein-coding
upeaks-3023	chr1	184019213	184019733	+	0	NA	Intergenic	RMER10A|LTR|ERVL	14525	NM_028516	73363	Mm.50115	NM_028516	ENSMUSG00000044854	1700056E22Rik	-	RIKEN cDNA 1700056E22 gene	protein-coding
upeaks-44845	chr9	7270062	7270462	+	0	NA	Intergenic	Intergenic	-2252	NM_008607	17386	Mm.5022	NM_008607	ENSMUSG00000050578	Mmp13	Clg|MMP-13|Mmp1	matrix metallopeptidase 13	protein-coding
upeaks-16380	chr15	81561578	81561810	+	0	NA	Intergenic	Intergenic	-24520	NM_177821	328572	Mm.258397	NM_177821	ENSMUSG00000055024	Ep300	A430090G16|A730011L11|KAT3B|p300|p300 HAT	E1A binding protein p300	protein-coding
upeaks-6014	chr11	8585109	8585308	+	0	NA	intron (NM_001083587, intron 3 of 30)	intron (NM_001083587, intron 3 of 30)	79327	NM_001083587	319939	Mm.337820	NM_001083587	ENSMUSG00000020422	Tns3	BC023928|F830010I22Rik|TEM6|Tens1	tensin 3	protein-coding
upeaks-6040	chr11	9604501	9604731	+	0	NA	intron (NM_178259, intron 55 of 61)	intron (NM_178259, intron 55 of 61)	412674	NM_178259	268379	Mm.39270	NM_178259	ENSMUSG00000004668	Abca13	9830132L24|A930002G16Rik|AI956815	ATP-binding cassette, sub-family A (ABC1), member 13	protein-coding
upeaks-26897	chr2	161713045	161713276	+	0	NA	intron (NM_001291151, intron 13 of 30)	intron (NM_001291151, intron 13 of 30)	-604074	NM_173368	71389	Mm.122738	NM_173368	ENSMUSG00000057133	Chd6	5430439G14Rik|6330406J24Rik|CHD-6	chromodomain helicase DNA binding protein 6	protein-coding
upeaks-873	chr1	72173385	72173814	+	0	NA	intron (NM_001005423, intron 2 of 4)	intron (NM_001005423, intron 2 of 4)	38708	NM_001005423	381269	Mm.422636	NM_001005423	ENSMUSG00000039395	Mreg	Gm974|Wdt2|dsu	melanoregulin	protein-coding
upeaks-27926	chr3	37917119	37917559	+	0	NA	intron (NR_040559, intron 1 of 3)	intron (NR_040559, intron 1 of 3)	18526	NR_040559	626410	Mm.389417	NR_040559	ENSMUSG00000106461	Gm20755	-	predicted gene, 20755	ncRNA
upeaks-30559	chr4	19071550	19071754	+	0	NA	Intergenic	Lx3A|LINE|L1	-209198	NM_013927	30952	Mm.445778	NM_013927	ENSMUSG00000056494	Cngb3	CCNC2|CNG6|Cngbeta2	cyclic nucleotide gated channel beta 3	protein-coding
upeaks-6162	chr11	19194387	19194677	+	0	NA	Intergenic	Intergenic	129257	NR_046037	74059	Mm.292321	NR_046037	ENSMUSG00000086025	4933406G16Rik	-	RIKEN cDNA 4933406G16 gene	ncRNA
upeaks-14002	chr14	46941854	46942163	+	0	NA	intron (NM_001037221, intron 2 of 12)	intron (NM_001037221, intron 2 of 12)	59043	NM_028966	74480	Mm.214454	NM_028966	ENSMUSG00000021838	Samd4	1700024G08Rik|1700111L17Rik|4933436G17Rik|Samd4a|Smaug|Smaug1|sunk	sterile alpha motif domain containing 4	protein-coding
upeaks-29152	chr3	104541842	104542055	+	0	NA	Intergenic	MER5A|DNA|hAT-Charlie	-30030	NM_001025067	269473	Mm.34855	NM_001025067	ENSMUSG00000032913	Lrig2	4632419I10Rik|BB096938|LIG-2	leucine-rich repeats and immunoglobulin-like domains 2	protein-coding
upeaks-37271	chr6	55037765	55038595	+	0	NA	exon (NM_180678, exon 1 of 17)	exon (NM_180678, exon 1 of 17)	179	NM_180678	353172	Mm.250004	NM_180678	ENSMUSG00000029777	Gars	GENA202|Gena201|Nmf249|Sgrp23	glycyl-tRNA synthetase	protein-coding
upeaks-46446	chr9	86280508	86280726	+	0	NA	Intergenic	Intergenic	184299	NM_027394	70348	Mm.53469	NM_027394	ENSMUSG00000032415	Ube2cbp	2610018I03Rik|Ube3d	ubiquitin-conjugating enzyme E2C binding protein	protein-coding
upeaks-34162	chr5	43539115	43539444	+	0	NA	intron (NM_001135172, intron 1 of 2)	intron (NM_001135172, intron 1 of 2)	23710	NM_001135172	109323	Mm.275553	NM_175425	ENSMUSG00000061535	C1qtnf7	5530401N20Rik|8430425G24Rik|Ctrp7	C1q and tumor necrosis factor related protein 7	protein-coding
upeaks-33179	chr4	148830363	148830711	+	0	NA	intron (NM_027195, intron 1 of 15)	intron (NM_027195, intron 1 of 15)	26145	NM_001159344	69743	Mm.233879	NM_027195	ENSMUSG00000028977	Casz1	2410019P08Rik|AV096627|BC040081|Cst|D4Ertd432e	castor zinc finger 1	protein-coding
upeaks-22133	chr18	82827833	82828440	+	0	NA	Intergenic	Intergenic	-27761	NR_125720	73985	Mm.399211	NR_125720	ENSMUSG00000097738	4930445N18Rik	3010027C24Rik	RIKEN cDNA 4930445N18 gene	ncRNA
upeaks-22608	chr19	14820969	14821176	+	0	NA	Intergenic	(TCTG)n|Simple_repeat|Simple_repeat	-222889	NM_001302950	21888	Mm.103638	NM_011600	ENSMUSG00000024642	Tle4	5730411M05Rik|AA792082|Bce-1|Bce1|ESTM13|ESTM14|Grg4|X83332|X83333|grg-4	transducin-like enhancer of split 4	protein-coding
upeaks-38813	chr6	134182445	134182975	+	0	NA	intron (NM_001303102, intron 3 of 8)	intron (NM_001303102, intron 3 of 8)	147010	NM_001303102	14011	Mm.269995	NM_007961	ENSMUSG00000030199	Etv6	AW123102|AW557856|Tel	ets variant 6	protein-coding
upeaks-11181	chr13	11023779	11024082	+	0	NA	Intergenic	RMER5|LTR|ERV1	-498122	NR_027813	664793	Mm.410565	NR_027813		Zp4-ps	EG664793|Zp4|Zpb	zona pellucida glycoprotein 4, pseudogene	pseudo
upeaks-39137	chr6	146685986	146686368	+	0	NA	Intergenic	Intergenic	28959	NR_046277	74925	Mm.386304	NR_046277	ENSMUSG00000085238	4930479D17Rik	-	RIKEN cDNA 4930479D17 gene	ncRNA
upeaks-22005	chr18	77845126	77845335	+	0	NA	intron (NM_013831, intron 2 of 14)	PB1|SINE|Alu	50680	NM_013831	19201	Mm.57174	NM_013831	ENSMUSG00000025429	Pstpip2	MAYP|cmo	proline-serine-threonine phosphatase-interacting protein 2	protein-coding
upeaks-10160	chr12	79750202	79750667	+	0	NA	intron (NM_009014, intron 8 of 10)	MIRc|SINE|MIR	174299	NR_131075	77290	Mm.395042	NR_131073		9430078K24Rik	-	RIKEN cDNA 9430078K24 gene	ncRNA
upeaks-34141	chr5	42036489	42036910	+	0	NA	Intergenic	Intergenic	-31261	NR_131130	433882	Mm.319353	NR_131130	ENSMUSG00000067285	Gm16223	EG433882|OTTMUSG00000031875	predicted gene 16223	ncRNA
upeaks-25507	chr2	106643844	106644099	+	0	NA	intron (NR_137201, intron 5 of 6)	intron (NR_137201, intron 5 of 6)	6393	NR_137201	102640562	Mm.404175	NR_137201	ENSMUSG00000085218	BB218582	-	expressed sequence BB218582	ncRNA
upeaks-5666	chr10	125621427	125621626	+	0	NA	Intergenic	Intergenic	-292991	NM_011391	20503	Mm.29161	NM_011391	ENSMUSG00000020102	Slc16a7	4921534N07Rik|Mct2	solute carrier family 16 (monocarboxylic acid transporters), member 7	protein-coding
upeaks-3704	chr10	26280136	26280352	+	0	NA	exon (NM_172787, exon 20 of 22)	exon (NM_172787, exon 20 of 22)	50537	NM_001013766	268288	Mm.213322	NM_001013766	ENSMUSG00000051354	Samd3	Gm623	sterile alpha motif domain containing 3	protein-coding
upeaks-41661	chr7	126862339	126862543	+	0	NA	promoter-TSS (NM_153580)	promoter-TSS (NM_153580)	469	NM_172746	233876	Mm.363427	NM_172746	ENSMUSG00000042606	Hirip3	B130036O03|C86302	HIRA interacting protein 3	protein-coding
upeaks-3949	chr10	41749019	41749244	+	0	NA	intron (NM_001243074, intron 2 of 10)	ID_B1|SINE|B4	60532	NM_001243075	103268	Mm.338605	NM_026643	ENSMUSG00000019813	Cep57l1	2410017P07Rik|4930484D11Rik|AI607327|cep57R	centrosomal protein 57-like 1	protein-coding
upeaks-46987	chr9	109825859	109826058	+	0	NA	intron (NM_183136, intron 4 of 4)	intron (NM_183136, intron 4 of 4)	5473	NR_033215	378954	Mm.335474	NR_033215		3000002C10Rik	-	glyceraldehyde-3-phosphate dehydrogenase pseudogene	pseudo
upeaks-7141	chr11	64609121	64609361	+	0	NA	Intergenic	Intergenic	-172567	NR_028445	654805	Mm.436132	NR_028445		F930015N05Rik	-	RIKEN cDNA F930015N05 gene	ncRNA
upeaks-45239	chr9	32292656	32293043	+	0	NA	Intergenic	Intergenic	51388	NM_010605	16521	Mm.69472	NM_010605	ENSMUSG00000032034	Kcnj5	GIRK4|Kir3.4	potassium inwardly-rectifying channel, subfamily J, member 5	protein-coding
upeaks-23033	chr19	42811682	42811949	+	0	NA	intron (NM_001081257, intron 10 of 11)	intron (NM_001081257, intron 10 of 11)	-31839	NM_019424	192236	Mm.218381	NM_019424	ENSMUSG00000025188	Hps1	6030422N11Rik|BB405864|Gm21361|Hps|ep	Hermansky-Pudlak syndrome 1	protein-coding
upeaks-45102	chr9	23203311	23203648	+	0	NA	Intergenic	Intergenic	-19597	NM_028472	73230	Mm.335020	NM_028472	ENSMUSG00000031963	Bmper	3110056H04Rik|CV-2|Crim3|Cv2	BMP-binding endothelial regulator	protein-coding
upeaks-35820	chr5	132975002	132975201	+	0	NA	Intergenic	Intergenic	-432758	NM_177047	319974	Mm.409595	NM_177047	ENSMUSG00000029673	Auts2	2700063G02Rik|A730011F23Rik|D830032G16Rik	autism susceptibility candidate 2	protein-coding
upeaks-11093	chr13	4230902	4231251	+	0	NA	Intergenic	Intergenic	-2664	NM_001013785	432720	Mm.22832	NM_001013785	ENSMUSG00000071551	Akr1c19	1810010N06Rik	aldo-keto reductase family 1, member C19	protein-coding
upeaks-44864	chr9	7961385	7961658	+	0	NA	intron (NM_009534, intron 4 of 7)	intron (NM_009534, intron 4 of 7)	43075	NM_001171147	22601	Mm.221992	NM_009534	ENSMUSG00000053110	Yap1	AI325207|Yap|Yap65|Yki|Yorkie	yes-associated protein 1	protein-coding
upeaks-45895	chr9	61445914	61446147	+	0	NA	Intergenic	Intergenic	73664	NM_001083928	21887	Mm.24255	NM_009389	ENSMUSG00000032280	Tle3	2610103N05Rik|ESG|Grg3a|Grg3b|mKIAA1547	transducin-like enhancer of split 3	protein-coding
upeaks-44270	chr8	113820976	113821653	+	0	NA	intron (NM_172466, intron 3 of 22)	intron (NM_172466, intron 3 of 22)	27525	NM_172466	208936	Mm.167471	NM_172466	ENSMUSG00000053399	Adamts18	9630038L21|ADAMTS21|E130314N14Rik	a disintegrin-like and metallopeptidase (reprolysin type) with thrombospondin type 1 motif, 18	protein-coding
upeaks-26104	chr2	132060133	132060350	+	0	NA	intron (NM_018824, intron 14 of 15)	B1_Mur3|SINE|Alu	-30253	NM_175445	215653	Mm.204737	NM_175445	ENSMUSG00000027339	Rassf2	3830431H01Rik|9030412M04Rik|AI852669|AW495050	Ras association (RalGDS/AF-6) domain family member 2	protein-coding
upeaks-38495	chr6	120594539	120594738	+	0	NA	Intergenic	PB1|SINE|Alu	39842	NR_045733	73505	Mm.416867	NR_045733		1700072O05Rik	-	RIKEN cDNA 1700072O05 gene	ncRNA
upeaks-2797	chr1	175671937	175672136	+	0	NA	intron (NM_010098, intron 1 of 3)	intron (NM_010098, intron 1 of 3)	16317	NM_021350	12663	Mm.440490	NM_021350	ENSMUSG00000078185	Chml	AI450814|E030003F13Rik|REP-2|Rep2	choroideremia-like	protein-coding
upeaks-428	chr1	38499429	38499688	+	0	NA	intron (NM_001290814, intron 4 of 21)	intron (NM_001290814, intron 4 of 21)	127686	NM_001290814	16764	Mm.336679	NM_010678	ENSMUSG00000037138	Aff3	3222402O04Rik|A730046J16|LAF-4|Laf4	AF4/FMR2 family, member 3	protein-coding
upeaks-27235	chr2	171597767	171598061	+	0	NA	Intergenic	Intergenic	364885	NR_040509	75655	Mm.396203	NR_040509	ENSMUSG00000086823	1700028P15Rik	-	RIKEN cDNA 1700028P15 gene	ncRNA
upeaks-15895	chr15	62092664	62093208	+	0	NA	intron (NR_132746, intron 1 of 6)	intron (NR_132746, intron 1 of 6)	53679	NR_132746	19296	Mm.4608	NM_011222	ENSMUSG00000097039	Pvt1	Ayu21-84Imeg|Gt(pU21)84Imeg|Mis-1|Mlvi-1|Pvt-1	plasmacytoma variant translocation 1	ncRNA
upeaks-6398	chr11	32038428	32038748	+	0	NA	intron (NM_001290680, intron 3 of 4)	intron (NM_001290680, intron 3 of 4)	37311	NM_001290681	18197	Mm.3304	NM_008741	ENSMUSG00000020297	Nsg2	-	neuron specific gene family member 2	protein-coding
upeaks-10398	chr12	87327563	87327810	+	0	NA	intron (NM_011479, intron 9 of 11)	intron (NM_011479, intron 9 of 11)	-27981	NM_001290302	217738	Mm.219363	NM_001290302	ENSMUSG00000050671	Ism2	Gm264|Thsd3	isthmin 2	protein-coding
upeaks-10150	chr12	79352742	79353049	+	0	NA	intron (NM_009014, intron 7 of 10)	intron (NM_009014, intron 7 of 10)	55544	NM_001252562	19363	Mm.341756	NM_009014	ENSMUSG00000059060	Rad51b	AI553500|R51H2|Rad51l1|mREC2	RAD51 paralog B	protein-coding
upeaks-12711	chr13	92302355	92302629	+	0	NA	intron (NM_001311120, intron 10 of 23)	intron (NM_001311120, intron 10 of 23)	-52291	NM_010049	13361	Mm.23695	NM_010049	ENSMUSG00000021707	Dhfr	8430436I03Rik|AA607882|AI662710|AW555094	dihydrofolate reductase	protein-coding
upeaks-44771	chr8	128113277	128113532	+	0	NA	Intergenic	Intergenic	164821	NR_105822	102465212		NR_105822	ENSMUSG00000099326	Mir21c	Gm28013|mmu-mir-21c	microRNA 21c	ncRNA
upeaks-18140	chr16	58481849	58482048	+	0	NA	intron (NM_018784, intron 6 of 10)	intron (NM_018784, intron 6 of 10)	41364	NM_018784	54613	Mm.212742	NM_018784	ENSMUSG00000022747	St3gal6	1700023B24Rik|AI930218|AW552396|Siat10|St3galVI	ST3 beta-galactoside alpha-2,3-sialyltransferase 6	protein-coding
upeaks-23820	chr2	22029480	22029741	+	0	NA	Intergenic	Intergenic	-197893	NM_148413	667663	Mm.330033	NM_148413	ENSMUSG00000025716	Myo3a	9030416P08Rik	myosin IIIA	protein-coding
upeaks-22119	chr18	82589107	82589404	+	0	NA	Intergenic	Intergenic	34747	NM_001025254	17196	Mm.252063	NM_010777	ENSMUSG00000041607	Mbp	C76307|Hmbpr|R75289|golli-mbp|jve|mld|shi	myelin basic protein	protein-coding
upeaks-26430	chr2	145712008	145712338	+	0	NA	intron (NR_033220, intron 1 of 3)	intron (NR_033220, intron 1 of 3)	10978	NR_033220	408057	Mm.486711	NR_033220	ENSMUSG00000087594	BC039771	-	cDNA sequence BC039771	ncRNA
upeaks-45191	chr9	29531308	29531547	+	0	NA	intron (NM_172290, intron 1 of 7)	intron (NM_172290, intron 1 of 7)	431702	NM_172290	235106	Mm.283138	NM_172290	ENSMUSG00000059974	Ntm	6230410L23Rik|B230210G24Rik|Hnt|Igdcc2|R75390	neurotrimin	protein-coding
upeaks-41763	chr7	129790730	129791245	+	0	NA	Intergenic	Intergenic	-171178	NR_046077	100043150	Mm.334264	NR_046077	ENSMUSG00000108504	Gm4265	-	predicted gene 4265	ncRNA
upeaks-47969	chrX	104737134	104737349	+	0	NA	Intergenic	PB1|SINE|Alu	-66177	NM_175358	108672	Mm.30574	NM_175358	ENSMUSG00000033906	Zdhhc15	6030457O13Rik	zinc finger, DHHC domain containing 15	protein-coding
upeaks-14082	chr14	51212745	51213011	+	0	NA	Intergenic	RLTR13A|LTR|ERVK	9183	NM_017389	503847	Mm.377124	NM_017389	ENSMUSG00000050766	Ear14	-	eosinophil-associated, ribonuclease A family, member 14	protein-coding
upeaks-3547	chr10	17491086	17491285	+	0	NA	Intergenic	Intergenic	-232043	NM_010828	17684	Mm.272321	NM_010828	ENSMUSG00000039910	Cited2	AI835299|ER154-like|Mrg1|Msg2|p35srj	Cbp/p300-interacting transactivator, with Glu/Asp-rich carboxy-terminal domain, 2	protein-coding
upeaks-21097	chr18	32538451	32538658	+	0	NA	intron (NM_001048207, intron 1 of 2)	intron (NM_001048207, intron 1 of 2)	21480	NM_001347610	71683	Mm.292145	NM_027863	ENSMUSG00000090523	Gypc	0610037F22Rik|Cd236r	glycophorin C	protein-coding
upeaks-166	chr1	16372081	16372312	+	0	NA	intron (NM_001347045, intron 8 of 10)	intron (NM_001347045, intron 8 of 10)	146919	NM_001347044	29819	Mm.216257	NM_025303	ENSMUSG00000025920	Stau2	-	staufen (RNA binding protein) homolog 2 (Drosophila)	protein-coding
upeaks-8705	chr11	112501803	112502179	+	0	NA	Intergenic	Intergenic	209365	NR_024085	217294	Mm.297761	NM_146031	ENSMUSG00000041674	BC006965	-	cDNA sequence BC006965	ncRNA
upeaks-13847	chr14	33682833	33683118	+	0	NA	Intergenic	Intergenic	93705	NM_008978	19256	Mm.8019	NM_008978	ENSMUSG00000021940	Ptpn20	typ	protein tyrosine phosphatase, non-receptor type 20	protein-coding
upeaks-41878	chr7	134287900	134288146	+	0	NA	intron (NM_001199941, intron 6 of 8)	intron (NM_001199941, intron 6 of 8)	-62926	NM_007400	11489	Mm.439714	NM_007400	ENSMUSG00000054555	Adam12	Mltna	a disintegrin and metallopeptidase domain 12 (meltrin alpha)	protein-coding
upeaks-37871	chr6	91014713	91014970	+	0	NA	intron (NM_018815, intron 39 of 39)	intron (NM_018815, intron 39 of 39)	101985	NM_018815	54563	Mm.28162	NM_018815	ENSMUSG00000030091	Nup210	9830001L10|AI836801|Pom210|gp190|gp210	nucleoporin 210	protein-coding
upeaks-42511	chr8	20954470	20954680	+	0	NA	Intergenic	RMER19B|LTR|ERVK	-9827	NM_001012640	100503970	Mm.490241	NM_001012640	ENSMUSG00000079120	AY761185	-	cDNA sequence AY761185	protein-coding
upeaks-43988	chr8	102904353	102904576	+	0	NA	Intergenic	Lx10|LINE|L1	-119353	NM_009866	12552	Mm.1571	NM_009866	ENSMUSG00000031673	Cdh11	Cad11|OSF-4	cadherin 11	protein-coding
upeaks-27931	chr3	38299267	38299499	+	0	NA	Intergenic	Intergenic	-91264	NR_040541	71342	Mm.410782	NR_040541	ENSMUSG00000106002	5430434I15Rik	-	RIKEN cDNA 5430434I15 gene	ncRNA
upeaks-17887	chr16	42303615	42303820	+	0	NA	promoter-TSS (NR_105858)	promoter-TSS (NR_105858)	-248	NR_105858	102466172		NR_105858	ENSMUSG00000098300	Mir6540	Gm27780|mir-6540|mmu-mir-6540	microRNA 6540	ncRNA
upeaks-9709	chr12	47009832	47010071	+	0	NA	Intergenic	Intergenic	-191176	NM_021361	664883	Mm.247195	NM_021361	ENSMUSG00000021047	Nova1	9430099M15Rik|G630039L02|Nova-1	neuro-oncological ventral antigen 1	protein-coding
upeaks-5468	chr10	117452344	117452579	+	0	NA	Intergenic	Intergenic	-75488	NM_001310609	432508	Mm.478881	NM_001013391	ENSMUSG00000055531	Cpsf6	4733401N12Rik|AI256641|CFIM|CFIM68|HPBRII-4|HPBRII-7	cleavage and polyadenylation specific factor 6	protein-coding
upeaks-21405	chr18	47377655	47377903	+	0	NA	Intergenic	Intergenic	-8909	NM_001311097	20358	Mm.40909	NM_018744	ENSMUSG00000019647	Sema6a	A730020P05Rik|AI851735|Sema6A-1|Semaq|VIa	sema domain, transmembrane domain (TM), and cytoplasmic domain, (semaphorin) 6A	protein-coding
upeaks-17656	chr16	31233595	31233794	+	0	NA	intron (NR_035427, intron 1 of 2)	intron (NR_035427, intron 1 of 2)	-32456	NM_030138	78618	Mm.274646	NM_030138	ENSMUSG00000049076	Acap2	4832442G16|9530039J15Rik|CNT-B2|Centb2|mKIAA0041	ArfGAP with coiled-coil, ankyrin repeat and PH domains 2	protein-coding
upeaks-38691	chr6	127398205	127398441	+	0	NA	Intergenic	ORR1B2|LTR|ERVL-MaLR	-48517	NM_001346513	101187	Mm.110818	NM_181402	ENSMUSG00000037997	Parp11	5330431N24Rik|AI851877|ARTD11|HIN1L|PARP-11	poly (ADP-ribose) polymerase family, member 11	protein-coding
upeaks-31197	chr4	62744580	62744897	+	0	NA	Intergenic	Intergenic	70764	NM_001310706	50780	Mm.286753	NM_019492	ENSMUSG00000059810	Rgs3	4930506N09Rik|C2PA-RGS3|C2pa|PDZ-RGS3|RGS3S	regulator of G-protein signaling 3	protein-coding
upeaks-20111	chr17	64129794	64130096	+	0	NA	intron (NM_008000, intron 11 of 13)	intron (NM_008000, intron 11 of 13)	-79273	NR_130982	68771	Mm.443351	NR_130982		1110058D11Rik	-	RIKEN cDNA 1110058D11 gene	ncRNA
upeaks-2167	chr1	151167551	151167867	+	0	NA	Intergenic	Intergenic	29675	NR_038011	402734	Mm.337666	NR_038011		C730036E19Rik	lncLSTR	RIKEN cDNA C730036E19 gene	ncRNA
upeaks-6901	chr11	56106610	56106905	+	0	NA	Intergenic	Intergenic	-65770	NM_153079	216749	Mm.213205	NM_153079	ENSMUSG00000037393	Nmur2	Nmu2r	neuromedin U receptor 2	protein-coding
upeaks-45308	chr9	35706763	35706979	+	0	NA	Intergenic	Lx9|LINE|L1	-19500	NM_001199953	100312987	Mm.445254	NM_001167677	ENSMUSG00000091215	Pate1	Gm17252|Pate	prostate and testis expressed 1	protein-coding
upeaks-26532	chr2	149650149	149650464	+	0	NA	Intergenic	Lx3_Mus|LINE|L1	-180477	NM_001085521	433485	Mm.330649	NM_001085521	ENSMUSG00000074736	Syndig1	AW123113|DSPC2|Gm14134|H2C20orf39|OTTMUSG00000015750|Tmem90b	synapse differentiation inducing 1	protein-coding
upeaks-20681	chr17	89016187	89016553	+	0	NA	intron (NM_013523, intron 4 of 9)	RLTR9B2|LTR|ERVK	184305	NM_013523	14309	Mm.57155	NM_013523	ENSMUSG00000032937	Fshr	-	follicle stimulating hormone receptor	protein-coding
upeaks-45922	chr9	62491198	62491495	+	0	NA	intron (NM_175484, intron 1 of 11)	intron (NM_175484, intron 1 of 11)	45698	NM_175484	235431	Mm.335229	NM_175484	ENSMUSG00000041729	Coro2b	CLIPINC|E130012P22Rik	coronin, actin binding protein, 2B	protein-coding
upeaks-1267	chr1	89054422	89054723	+	0	NA	Intergenic	Intergenic	-15890	NM_133816	98402	Mm.170983	NM_133816	ENSMUSG00000036206	Sh3bp4	AI594717|AW227605|BOG25	SH3-domain binding protein 4	protein-coding
upeaks-1880	chr1	132918258	132918601	+	0	NA	intron (NM_010732, intron 1 of 1)	intron (NM_010732, intron 1 of 1)	38074	NM_010732	16980	Mm.39640	NM_010732	ENSMUSG00000026443	Lrrn2	5730406J09Rik|NLRR-2	leucine rich repeat protein 2, neuronal	protein-coding
upeaks-14361	chr14	63368910	63369209	+	0	NA	Intergenic	Intergenic	48128	NM_007549	12143	Mm.3962	NM_007549	ENSMUSG00000014453	Blk	-	B lymphoid kinase	protein-coding
upeaks-23827	chr2	22677187	22677395	+	0	NA	intron (NM_008078, intron 12 of 15)	ERVB7_3-LTR_MM|LTR|ERVK	23008	NR_039548	100628608		NR_039548	ENSMUSG00000106199	Mir3967	mmu-mir-3967|mu-mir-3967	microRNA 3967	ncRNA
upeaks-35146	chr5	111239269	111239521	+	0	NA	intron (NM_001267622, intron 12 of 22)	intron (NM_001267622, intron 12 of 22)	-91302	NM_019640	56305	Mm.200516	NM_019640	ENSMUSG00000050017	Pitpnb	PI-TP-beta	phosphatidylinositol transfer protein, beta	protein-coding
upeaks-25807	chr2	120148068	120148351	+	0	NA	intron (NM_133838, intron 1 of 5)	intron (NM_133838, intron 1 of 5)	6366	NM_133838	98878	Mm.132226	NM_133838	ENSMUSG00000027293	Ehd4	2210022F10Rik|AI197390|AI846352|AV006278|Past2	EH-domain containing 4	protein-coding
upeaks-13373	chr14	11670870	11671164	+	0	NA	intron (NM_008981, intron 1 of 29)	intron (NM_008981, intron 1 of 29)	117464	NM_008981	19270	Mm.431266	NM_008981	ENSMUSG00000021745	Ptprg	5430405N12Rik|AW046354|AW549872|RPTPgamma	protein tyrosine phosphatase, receptor type, G	protein-coding
upeaks-39938	chr7	37466461	37466870	+	0	NA	Intergenic	Intergenic	303087	NM_172385	243937	Mm.322505	NM_172385	ENSMUSG00000043456	Zfp536	9630010P11Rik|Znf536|mKIAA0390	zinc finger protein 536	protein-coding
upeaks-28461	chr3	80991995	80992251	+	0	NA	Intergenic	RLTR9F|LTR|ERVK	-44293	NM_019971	54635	Mm.331089	NM_019971	ENSMUSG00000028019	Pdgfc	1110064L01Rik|AI647969|PDGF-C	platelet-derived growth factor, C polypeptide	protein-coding
upeaks-24675	chr2	60402696	60402904	+	0	NA	Intergenic	(CATTC)n|Simple_repeat|Simple_repeat	-8725	NR_046065	100039176	Mm.261790	NR_046065	ENSMUSG00000087283	Gm13580	OTTMUSG00000012842	predicted gene 13580	ncRNA
upeaks-19865	chr17	49065313	49065512	+	0	NA	intron (NM_027452, intron 1 of 2)	intron (NM_027452, intron 1 of 2)	48121	NR_038142	69311	Mm.46140	NR_038141	ENSMUSG00000101012	1700008K24Rik	-	RIKEN cDNA 1700008K24 gene	ncRNA
upeaks-21338	chr18	43282344	43282648	+	0	NA	intron (NM_178749, intron 5 of 12)	intron (NM_178749, intron 5 of 12)	74799	NM_178749	269019	Mm.150401	NM_178749	ENSMUSG00000039954	Stk32a	A930015B13Rik|YANK1	serine/threonine kinase 32A	protein-coding
upeaks-13155	chr13	113699510	113699769	+	0	NA	Intergenic	Intergenic	-35963	NM_019960	56534	Mm.41410	NM_019960	ENSMUSG00000051456	Hspb3	2310035K17Rik|AI844863|Hsbp3|spb3	heat shock protein 3	protein-coding
upeaks-2880	chr1	179446603	179446838	+	0	NA	intron (NM_027188, intron 1 of 11)	intron (NM_027188, intron 1 of 11)	71283	NM_027188	69726	Mm.222338	NM_027188	ENSMUSG00000055067	Smyd3	2410008A19Rik|Zmynd1	SET and MYND domain containing 3	protein-coding
upeaks-20966	chr18	20060044	20060362	+	0	NA	promoter-TSS (NM_013505)	promoter-TSS (NM_013505)	-649	NM_001317363	13506	Mm.280547	NM_013505	ENSMUSG00000024331	Dsc2	AW228162	desmocollin 2	protein-coding
upeaks-44769	chr8	128034136	128034499	+	0	NA	Intergenic	Intergenic	243908	NR_105822	102465212		NR_105822	ENSMUSG00000099326	Mir21c	Gm28013|mmu-mir-21c	microRNA 21c	ncRNA
upeaks-28410	chr3	78575800	78576116	+	0	NA	Intergenic	Intergenic	568929	NM_001310536	76089	Mm.31220	NM_001099624	ENSMUSG00000062232	Rapgef2	5830453M24Rik|CNRasGEF|Pdzgef1|RA-GEF-1|mKIAA0313|nRapGEP	Rap guanine nucleotide exchange factor (GEF) 2	protein-coding
upeaks-36997	chr6	39304395	39304702	+	0	NA	Intergenic	Intergenic	73159	NM_028123	72144	Mm.482167	NM_028123	ENSMUSG00000029924	Slc37a3	2610507O21Rik|AU044904	solute carrier family 37 (glycerol-3-phosphate transporter), member 3	protein-coding
upeaks-39052	chr6	144131912	144132137	+	0	NA	intron (NM_001243163, intron 2 of 13)	intron (NM_001243163, intron 2 of 13)	77544	NM_011444	20678	Mm.1752	NM_011444	ENSMUSG00000041540	Sox5	A730017D01Rik|AI528773	SRY (sex determining region Y)-box 5	protein-coding
upeaks-515	chr1	45290765	45291033	+	0	NA	Intergenic	Intergenic	-20639	NM_009930	12825	Mm.249555	NM_009930	ENSMUSG00000026043	Col3a1	AW550625|Col3a-1|Tsk-2|Tsk2	collagen, type III, alpha 1	protein-coding
upeaks-44459	chr8	120887958	120888292	+	0	NA	Intergenic	Intergenic	149486	NM_001301811	15900	Mm.334861	NM_008320	ENSMUSG00000041515	Irf8	AI893568|ICSBP|IRF-8|Icsbp1|Myls	interferon regulatory factor 8	protein-coding
upeaks-18312	chr16	77329044	77329619	+	0	NA	promoter-TSS (NR_015543)	promoter-TSS (NR_015543)	3	NR_015543	77994	Mm.394688	NR_015543	ENSMUSG00000090386	Mir99ahg	2810055G20Rik|D730043B02Rik	Mir99a and Mirlet7c-1 host gene (non-protein coding)	ncRNA
upeaks-31151	chr4	59777815	59778177	+	0	NA	intron (NM_001013577, intron 2 of 4)	intron (NM_001013577, intron 2 of 4)	5859	NM_001013577	66209	Mm.51988	NM_001013577	ENSMUSG00000038544	Inip	1110054O05Rik|2610312O17Rik|AA399876|Ssbip1	INTS3 and NABP interacting protein	protein-coding
upeaks-12654	chr13	89484388	89484799	+	0	NA	Intergenic	L1VL4|LINE|L1	-56043	NM_013500	12950	Mm.266790	NM_013500	ENSMUSG00000021613	Hapln1	BB099155|CLP|Crtl1|Crtl1l|LP|LP-1	hyaluronan and proteoglycan link protein 1	protein-coding
upeaks-45378	chr9	40241273	40241519	+	0	NA	Intergenic	Intergenic	-27820	NM_001286614	235281	Mm.290083	NM_153522	ENSMUSG00000049281	Scn3b	1110001K16Rik|4833414B02Rik|Scnb3	sodium channel, voltage-gated, type III, beta	protein-coding
upeaks-14012	chr14	47154438	47154724	+	0	NA	3' UTR (NM_008102, exon 6 of 6)	3' UTR (NM_008102, exon 6 of 6)	34821	NM_008102	14528	Mm.10651	NM_008102	ENSMUSG00000037580	Gch1	GTP-CH|GTPCH|Gch	GTP cyclohydrolase 1	protein-coding
upeaks-41381	chr7	114922244	114922501	+	0	NA	Intergenic	Intergenic	-26278	NR_040317	101786	Mm.395157	NR_040317	ENSMUSG00000108379	A730082K24Rik	AU044236	RIKEN cDNA A730082K24 gene	ncRNA
upeaks-44840	chr9	6927564	6927944	+	0	NA	TTS (NM_029851)	TTS (NM_029851)	249292	NM_029851	110350	Mm.237596	NM_029851	ENSMUSG00000047193	Dync2h1	4432416O06Rik|AI448217|D030010H02Rik|D330044F14Rik|DHC1b|DHC2|Dnchc2|b2b414Clo|mKIAA1997	dynein cytoplasmic 2 heavy chain 1	protein-coding
upeaks-18980	chr17	16804990	16805304	+	0	NA	Intergenic	Lx2B|LINE|L1	-258956	NM_001005358	449000	Mm.483718	NM_001005358	ENSMUSG00000096696	Zfp960	-	zinc finger protein 960	protein-coding
upeaks-10417	chr12	88850329	88850712	+	0	NA	intron (NM_001198587, intron 3 of 19)	intron (NM_001198587, intron 3 of 19)	56016	NM_001198587	18191	Mm.425766	NM_172544	ENSMUSG00000066392	Nrxn3	-	neurexin III	protein-coding
upeaks-1135	chr1	84333232	84333435	+	0	NA	Intergenic	RLTR13E|LTR|ERVK	-48688	NM_001003948	98496	Mm.187470	NM_001003948	ENSMUSG00000045658	Pid1	5033414K04Rik|NYGGF4	phosphotyrosine interaction domain containing 1	protein-coding
upeaks-6519	chr11	36108725	36108946	+	0	NA	intron (NM_011856, intron 12 of 28)	intron (NM_011856, intron 12 of 28)	-128746	NM_170779	211652	Mm.31267	NM_170779	ENSMUSG00000018849	Wwc1	AA408228|AU017197|BC037006|Kibra|mKIAA0869	WW, C2 and coiled-coil domain containing 1	protein-coding
upeaks-48031	chrX	112680617	112681094	+	0	NA	intron (NM_181579, intron 3 of 16)	RLTR18B|LTR|ERVK	17796	NM_181579	69693	Mm.34964	NM_181579	ENSMUSG00000034607	Pof1b	2310066B14Rik	premature ovarian failure 1B	protein-coding
upeaks-22981	chr19	41664060	41664343	+	0	NA	intron (NM_015748, intron 4 of 36)	intron (NM_015748, intron 4 of 36)	75550	NR_106166	102465884		NR_106166	ENSMUSG00000098286	Mir8091	Gm27575|mmu-mir-8091	microRNA 8091	ncRNA
upeaks-10393	chr12	87186799	87187033	+	0	NA	intron (NM_001033475, intron 1 of 5)	PB1|SINE|Alu	13313	NM_001033475	382620	Mm.374912	NM_001033475	ENSMUSG00000034111	Tmed8	6430595O10Rik|AI447224|Gm1184|Mem1	transmembrane p24 trafficking protein 8	protein-coding
upeaks-231	chr1	21855737	21856115	+	0	NA	intron (NM_001310477, intron 1 of 12)	intron (NM_001310477, intron 1 of 12)	106016	NM_001160139	226922	Mm.336519	NM_023872	ENSMUSG00000028033	Kcnq5	7730402H11|9230107O05Rik|AA589396|D1Mgi1	potassium voltage-gated channel, subfamily Q, member 5	protein-coding
upeaks-16732	chr15	94214604	94214803	+	0	NA	Intergenic	Intergenic	-32499	NR_045629	328594	Mm.135523	NR_045629		D630010B17Rik	Gm811	RIKEN cDNA D630010B17 gene	ncRNA
upeaks-20916	chr18	13761131	13761400	+	0	NA	intron (NM_145492, intron 5 of 7)	intron (NM_145492, intron 5 of 7)	211468	NM_145492	225207	Mm.40325	NM_145492	ENSMUSG00000024420	Zfp521	B930086A16Rik|Evi3|Znf521	zinc finger protein 521	protein-coding
upeaks-33359	chr4	153228125	153228335	+	0	NA	Intergenic	MT2A|LTR|ERVL	254600	NM_001099299	230959	Mm.318874	NM_001099299	ENSMUSG00000039546	Ajap1	Gm573	adherens junction associated protein 1	protein-coding
upeaks-5659	chr10	125184145	125184462	+	0	NA	Intergenic	Intergenic	144232	NM_011391	20503	Mm.29161	NM_011391	ENSMUSG00000020102	Slc16a7	4921534N07Rik|Mct2	solute carrier family 16 (monocarboxylic acid transporters), member 7	protein-coding
upeaks-28479	chr3	82054604	82055031	+	0	NA	intron (NM_017469, intron 4 of 13)	intron (NM_017469, intron 4 of 13)	19894	NM_017469	54195	Mm.9445	NM_017469	ENSMUSG00000028005	Gucy1b3	GC-S-beta-1|GCbeta1	guanylate cyclase 1, soluble, beta 3	protein-coding
upeaks-23201	chr19	46845122	46845321	+	0	NA	intron (NM_033569, intron 1 of 7)	MTEa|LTR|ERVL-MaLR	83612	NM_001102471	94219	Mm.306903	NM_033569	ENSMUSG00000064105	Cnnm2	AU015877|AW048635|Acdp2|Clp2	cyclin M2	protein-coding
upeaks-25598	chr2	112984951	112985156	+	0	NA	intron (NM_177652, intron 3 of 103)	L1_Mus4|LINE|L1	45278	NM_177652	20192	Mm.436657	NM_177652	ENSMUSG00000057378	Ryr3	AI851294|C230090H21|RYR-3	ryanodine receptor 3	protein-coding
upeaks-6034	chr11	9415269	9415507	+	0	NA	intron (NM_178259, intron 35 of 61)	Lx6|LINE|L1	223446	NM_178259	268379	Mm.39270	NM_178259	ENSMUSG00000004668	Abca13	9830132L24|A930002G16Rik|AI956815	ATP-binding cassette, sub-family A (ABC1), member 13	protein-coding
upeaks-44941	chr9	14589608	14589807	+	0	NA	intron (NM_001081395, intron 3 of 12)	intron (NM_001081395, intron 3 of 12)	25293	NM_001081395	75723	Mm.159552	NM_001081395	ENSMUSG00000013076	Amotl1	2310010G08Rik|2310067L22Rik|4932416D09Rik|JEAP|mFLJ00155	angiomotin-like 1	protein-coding
upeaks-31574	chr4	92625746	92626098	+	0	NA	Intergenic	L1MCa|LINE|L1	-478701	NM_027034	69314	Mm.55891	NM_027034	ENSMUSG00000028533	Izumo3	1700011H22Rik	IZUMO family member 3	protein-coding
upeaks-5672	chr10	125839731	125839930	+	0	NA	Intergenic	AmnSINE1|SINE|Deu	-126389	NM_177152	320398	Mm.275586	NM_177152	ENSMUSG00000020105	Lrig3	9030421L11Rik|9130004I02Rik|9430095K15Rik|mKIAA3016	leucine-rich repeats and immunoglobulin-like domains 3	protein-coding
upeaks-11480	chr13	24187096	24187404	+	0	NA	intron (NM_001311122, intron 2 of 37)	intron (NM_001311122, intron 2 of 37)	93540	NM_001311122	68732	Mm.211047	NM_026825	ENSMUSG00000021338	Carmil1	1110037D04Rik|AI425970|CARMIL|CARML1|D130057M20|Lrrc16|Lrrc16a	capping protein regulator and myosin 1 linker 1	protein-coding
upeaks-32416	chr4	127474773	127475048	+	0	NA	Intergenic	Intergenic	-116746	NM_010291	14622	Mm.26859	NM_010291	ENSMUSG00000042357	Gjb5	Cnx31.1|Cx31.1|Gjb-5	gap junction protein, beta 5	protein-coding
upeaks-17988	chr16	48252919	48253212	+	0	NA	Intergenic	Intergenic	-30670	NM_028610	73693	Mm.35597	NM_028610	ENSMUSG00000058550	Dppa4	2410091M23Rik|C76608|ECAT15-1	developmental pluripotency associated 4	protein-coding
upeaks-21822	chr18	68903566	68903765	+	0	NA	intron (NR_038051, intron 3 of 6)	RLTR41A2|LTR|ERV1	47863	NR_038051	78931	Mm.160155	NR_038051		4930546C10Rik	-	RIKEN cDNA 4930546C10 gene	ncRNA
upeaks-42400	chr8	12997025	12997230	+	0	NA	intron (NM_001159486, intron 6 of 29)	intron (NM_001159486, intron 6 of 29)	-28907	NM_010172	14068	Mm.4827	NM_010172	ENSMUSG00000031443	F7	AI132620|Cf7|FVII	coagulation factor VII	protein-coding
upeaks-48121	chrX	139194488	139194868	+	0	NA	Intergenic	Intergenic	-15366	NM_001164630	245631	Mm.131001	NM_175541	ENSMUSG00000042515	Mum1l1	9430086K21Rik	melanoma associated antigen (mutated) 1-like 1	protein-coding
upeaks-47593	chrX	41508055	41508362	+	0	NA	intron (NR_104053, intron 3 of 16)	intron (NR_104053, intron 3 of 16)	106679	NM_001290451	53623	Mm.327681	NM_016886	ENSMUSG00000001986	Gria3	2900064I19Rik|GluA3|GluR-C|GluR-K3|Glur-3|Glur3|Gluralpha3	glutamate receptor, ionotropic, AMPA3 (alpha 3)	protein-coding
upeaks-23204	chr19	46976002	46976232	+	0	NA	intron (NM_001164363, intron 1 of 17)	PB1|SINE|Alu	-6550	NM_001164365	76952	Mm.40965	NM_029810	ENSMUSG00000025041	Nt5c2	2010002I23Rik|CnII|ENSMUSG00000025039|Gm9751|Gmp|Nt5b|Pnt5|cN-II	5'-nucleotidase, cytosolic II	protein-coding
upeaks-21414	chr18	48262655	48262857	+	0	NA	Intergenic	Intergenic	217421	NM_001025388	433182	Mm.70666	NM_001025388	ENSMUSG00000059040	Eno1b	EG433182|Eno1|Gm5506	enolase 1B, retrotransposed	protein-coding
upeaks-15431	chr15	27369735	27369942	+	0	NA	Intergenic	PB1|SINE|Alu	-96839	NM_020332	11732	Mm.265264	NM_020332	ENSMUSG00000022265	Ank	Ankh|D15Ertd221e|ank|mKIAA1581	progressive ankylosis	protein-coding
upeaks-27958	chr3	40528426	40528848	+	0	NA	Intergenic	Intergenic	-5725	NR_040445	100040882	Mm.272869	NR_040445	ENSMUSG00000037884	1700017G19Rik	-	RIKEN cDNA 1700017G19 gene	ncRNA
upeaks-30053	chr3	146278468	146279118	+	0	NA	intron (NM_022983, intron 2 of 2)	intron (NM_022983, intron 2 of 2)	57832	NM_022983	65086	Mm.155520	NM_022983	ENSMUSG00000036832	Lpar3	Edg7|lpA3	lysophosphatidic acid receptor 3	protein-coding
upeaks-25538	chr2	108795221	108795457	+	0	NA	Intergenic	L2b|LINE|L2	482951	NM_029790	76894	Mm.330451	NM_029790	ENSMUSG00000057234	Mettl15	0610027B03Rik|AI303697|AW049952|Mett5d1	methyltransferase like 15	protein-coding
upeaks-38057	chr6	99350287	99350742	+	0	NA	intron (NM_001347345, intron 2 of 19)	intron (NM_001347345, intron 2 of 19)	-83999	NM_001197321	108655	Mm.234965	NM_053202	ENSMUSG00000030067	Foxp1	3110052D19Rik|4932443N09Rik|AI461938|AW494214	forkhead box P1	protein-coding
upeaks-41173	chr7	105762630	105762863	+	0	NA	exon (NM_001162943, exon 10 of 21)	exon (NM_001162943, exon 10 of 21)	-10511	NM_009906	12751	Mm.20837	NM_009906	ENSMUSG00000030894	Tpp1	Cln2|LPIC|TPP-1|TPP-I	tripeptidyl peptidase I	protein-coding
upeaks-32697	chr4	134612289	134612686	+	0	NA	intron (NM_207237, intron 2 of 11)	ORR1E|LTR|ERVL-MaLR	-44636	NR_105829	102465216		NR_105829	ENSMUSG00000099289	Mir6403	Gm27992|mmu-mir-6403	microRNA 6403	ncRNA
upeaks-45121	chr9	24811450	24811954	+	0	NA	Intergenic	Intergenic	-37399	NM_194263	57246	Mm.31452	NM_020496	ENSMUSG00000031965	Tbx20	9430010M06Rik|AL022859|Tbx12	T-box 20	protein-coding
upeaks-47519	chrX	20356307	20356586	+	0	NA	Intergenic	Intergenic	-8035	NR_110966	19889	Mm.288141	NM_133669	ENSMUSG00000060090	Rp2	AI662636|Rp2h	retinitis pigmentosa 2 homolog	protein-coding
upeaks-21415	chr18	48670414	48670707	+	0	NA	Intergenic	Intergenic	625225	NM_001025388	433182	Mm.70666	NM_001025388	ENSMUSG00000059040	Eno1b	EG433182|Eno1|Gm5506	enolase 1B, retrotransposed	protein-coding
upeaks-32615	chr4	133297472	133297690	+	0	NA	exon (NM_199306, exon 13 of 16)	exon (NM_199306, exon 13 of 16)	-19791	NM_025667	52174	Mm.244748	NM_025667	ENSMUSG00000028857	Tmem222	5730406H10Rik|AA409341|D4Ertd196e	transmembrane protein 222	protein-coding
upeaks-2398	chr1	160899725	160900026	+	0	NA	Intergenic	Intergenic	-6536	NM_001024952	381305	Mm.329667	NM_001024952	ENSMUSG00000040423	Rc3h1	5730557L09Rik|Gm551|N28103|mKIAA2025	RING CCCH (C3H) domains 1	protein-coding
upeaks-5939	chr11	5490601	5490820	+	0	NA	Intergenic	PB1|SINE|Alu	-29931	NM_013842	22433	Mm.469937	NM_013842	ENSMUSG00000020484	Xbp1	D11Ertd39e|TREB-5|TREB5|XBP-1	X-box binding protein 1	protein-coding
upeaks-47754	chrX	73855119	73855318	+	0	NA	exon (NM_008478, exon 29 of 29)	exon (NM_008478, exon 29 of 29)	25616	NM_008478	16728	Mm.260568	NM_008478	ENSMUSG00000031391	L1cam	CD171|L1|N-CAM-L1|NCAM-L1	L1 cell adhesion molecule	protein-coding
upeaks-45277	chr9	34951216	34951432	+	0	NA	intron (NM_001190913, intron 4 of 13)	intron (NM_001190913, intron 4 of 13)	-165404	NR_029475	78934	Mm.391688	NR_029475	ENSMUSG00000070315	4930581F22Rik	-	RIKEN cDNA 4930581F22 gene	ncRNA
upeaks-1493	chr1	104932908	104933433	+	0	NA	intron (NM_011800, intron 1 of 11)	intron (NM_011800, intron 1 of 11)	164351	NM_011800	23836	Mm.103640	NM_011800	ENSMUSG00000050840	Cdh20	Cdh7	cadherin 20	protein-coding
upeaks-1795	chr1	130832617	130832929	+	0	NA	intron (NM_011082, intron 1 of 10)	intron (NM_011082, intron 1 of 10)	6089	NM_011082	18703	Mm.276414	NM_011082	ENSMUSG00000026417	Pigr	-	polymeric immunoglobulin receptor	protein-coding
upeaks-175	chr1	17013993	17014223	+	0	NA	intron (NM_020604, intron 3 of 4)	L1_Rod|LINE|L1	83781	NM_020604	57339	Mm.143761	NM_020604	ENSMUSG00000042686	Jph1	ENSMUSG00000054314|JP-1|Jp1	junctophilin 1	protein-coding
upeaks-3763	chr10	30315734	30315949	+	0	NA	Intergenic	ERVB7_4-LTR_MM|LTR|ERVK	-115301	NM_001109747	66311	Mm.251779	NM_001109747	ENSMUSG00000075266	Cenpw	2610036L11Rik|Cug2	centromere protein W	protein-coding
upeaks-24783	chr2	66138150	66138405	+	0	NA	Intergenic	L1_Mus3|LINE|L1	-13484	NM_015736	14425	Mm.439760	NM_015736	ENSMUSG00000026994	Galnt3	-	UDP-N-acetyl-alpha-D-galactosamine:polypeptide N-acetylgalactosaminyltransferase 3	protein-coding
upeaks-34135	chr5	41621733	41622040	+	0	NA	Intergenic	Intergenic	85805	NM_001310592	100972	Mm.41555	NM_027295	ENSMUSG00000029128	Rab28	2700023P08Rik|AW496496	RAB28, member RAS oncogene family	protein-coding
upeaks-31522	chr4	88477325	88477544	+	0	NA	Intergenic	L1MA4|LINE|L1	-38508	NM_025760	66775	Mm.386788	NM_025760	ENSMUSG00000028497	Hacd4	4933428I03Rik|Hcad4|Ptplad2	3-hydroxyacyl-CoA dehydratase 4	protein-coding
upeaks-23001	chr19	42035336	42035664	+	0	NA	promoter-TSS (NM_020033)	promoter-TSS (NM_020033)	-538	NM_020033	56642	Mm.143737	NM_020033	ENSMUSG00000025172	Ankrd2	Arpp|mArpp	ankyrin repeat domain 2 (stretch responsive muscle)	protein-coding
upeaks-26274	chr2	138585956	138586192	+	0	NA	Intergenic	Intergenic	-233855	NR_035477	100316816		NR_035477	ENSMUSG00000088983	Mir1952	mmu-mir-1952	microRNA 1952	ncRNA
upeaks-12879	chr13	99754264	99754477	+	0	NA	Intergenic	Intergenic	146313	NM_001081493	27220	Mm.75498	NM_013732	ENSMUSG00000021647	Cartpt	Cart	CART prepropeptide	protein-coding
upeaks-30994	chr4	49480973	49481239	+	0	NA	Intergenic	RLTR9C|LTR|ERVK	25452	NM_007519	12012	Mm.2859	NM_007519	ENSMUSG00000039653	Baat	AI118337|AI158864|BAT	bile acid-Coenzyme A: amino acid N-acyltransferase	protein-coding
upeaks-3116	chr1	187939154	187939401	+	0	NA	intron (NM_001243792, intron 2 of 7)	intron (NM_001243792, intron 2 of 7)	-58550	NM_011935	26381	Mm.89989	NM_011935	ENSMUSG00000026610	Esrrg	ERR3|Errg|NR3B3|mKIAA0832	estrogen-related receptor gamma	protein-coding
upeaks-41992	chr7	139875835	139876034	+	0	NA	exon (NM_177469, exon 8 of 8)	exon (NM_177469, exon 8 of 8)	-18762	NM_177261	76484	Mm.44442	NM_177261	ENSMUSG00000066129	Kndc1	2410012C07Rik|B830014K08Rik|VKIND|very-kind	kinase non-catalytic C-lobe domain (KIND) containing 1	protein-coding
upeaks-40703	chr7	81566897	81567271	+	0	NA	promoter-TSS (NM_172904)	promoter-TSS (NM_172904)	-103	NM_172904	244091	Mm.38773	NM_172904	ENSMUSG00000038663	Fsd2	9830160G03Rik|Spryd1	fibronectin type III and SPRY domain containing 2	protein-coding
upeaks-26887	chr2	161187528	161187893	+	0	NA	Intergenic	Intergenic	-78624	NM_173368	71389	Mm.122738	NM_173368	ENSMUSG00000057133	Chd6	5430439G14Rik|6330406J24Rik|CHD-6	chromodomain helicase DNA binding protein 6	protein-coding
upeaks-30666	chr4	31343908	31344124	+	0	NA	Intergenic	Intergenic	-620091	NM_009316	26409	Mm.258589	NM_009316	ENSMUSG00000028284	Map3k7	B430101B05|C87327|Tak1	mitogen-activated protein kinase kinase kinase 7	protein-coding
upeaks-45649	chr9	51766516	51766767	+	0	NA	intron (NM_175535, intron 1 of 14)	intron (NM_175535, intron 1 of 14)	1289	NM_175535	244867	Mm.400352	NM_175535	ENSMUSG00000053199	Arhgap20	6530403F17Rik|A530023E23Rik|RARhoGAP|mKIAA1391	Rho GTPase activating protein 20	protein-coding
upeaks-26896	chr2	161705647	161705890	+	0	NA	intron (NM_001291151, intron 13 of 30)	intron (NM_001291151, intron 13 of 30)	-596682	NM_173368	71389	Mm.122738	NM_173368	ENSMUSG00000057133	Chd6	5430439G14Rik|6330406J24Rik|CHD-6	chromodomain helicase DNA binding protein 6	protein-coding
upeaks-512	chr1	44951120	44951371	+	0	NA	Intergenic	(CTATT)n|Simple_repeat|Simple_repeat	-206296	NR_040602	75066	Mm.416932	NR_040602	ENSMUSG00000101701	4930521E06Rik	-	RIKEN cDNA 4930521E06 gene	ncRNA
upeaks-30782	chr4	40434479	40434680	+	0	NA	Intergenic	PB1|SINE|Alu	-37601	NM_177175	320500	Mm.156365	NM_177175	ENSMUSG00000046593	Tmem215	A930001M12Rik	transmembrane protein 215	protein-coding
upeaks-45371	chr9	39292662	39292870	+	0	NA	intron (NR_033620, intron 1 of 1)	intron (NR_033620, intron 1 of 1)	6715	NR_033620	257924	Mm.261800	NR_033620	ENSMUSG00000111190	Olfr947-ps1	MOR171-43	olfactory receptor 947, pseudogene 1	pseudo
upeaks-36525	chr6	8487517	8487876	+	0	NA	Intergenic	Intergenic	21465	NR_040452	320312	Mm.374890	NR_040452	ENSMUSG00000087305	A430035B10Rik	2810488G03Rik	RIKEN cDNA A430035B10 gene	ncRNA
upeaks-21313	chr18	41429242	41429614	+	0	NA	Intergenic	Intergenic	521766	NM_029942	77619	Mm.30649	NM_029942	ENSMUSG00000056671	Prelid2	1700003A01Rik|C330008K14Rik	PRELI domain containing 2	protein-coding
upeaks-33283	chr4	150917732	150917952	+	0	NA	Intergenic	Intergenic	-2313	NM_011612	21942	Mm.244187	NM_011612	ENSMUSG00000028965	Tnfrsf9	4-1BB|A930040I11Rik|AA408498|AI325004|CDw137|Cd137|ILA|Ly63	tumor necrosis factor receptor superfamily, member 9	protein-coding
upeaks-27640	chr3	15098242	15098586	+	0	NA	Intergenic	Intergenic	127213	NR_040550	77127	Mm.195792	NR_040549	ENSMUSG00000098008	A930001A20Rik	-	RIKEN cDNA A930001A20 gene	ncRNA
upeaks-22508	chr19	9080026	9080339	+	0	NA	Intergenic	Intergenic	7774	NM_011681	22287	Mm.2258	NM_011681	ENSMUSG00000024653	Scgb1a1	CC10|CC16|CCSP|PCB-BP|UG|UGB|Utg	secretoglobin, family 1A, member 1 (uteroglobin)	protein-coding
upeaks-9585	chr12	33853066	33853591	+	0	NA	Intergenic	Intergenic	-75097	NM_033522	114712	Mm.204643	NM_033522	ENSMUSG00000046518	Ferd3l	Mnato3|N-twist|Nato|Nato3|Ntwist|Ptfb|bHLHa31|fer3	Fer3-like (Drosophila)	protein-coding
upeaks-6552	chr11	40491446	40491945	+	0	NA	Intergenic	Intergenic	200987	NM_134017	108645	Mm.293771	NM_134017	ENSMUSG00000042032	Mat2b	1110064C04Rik|2410018D16Rik|AI182287|AU022853|MAT-II|MATIIbeta|TGR	methionine adenosyltransferase II, beta	protein-coding
upeaks-48040	chrX	114955112	114955376	+	0	NA	Intergenic	RMER16A2|LTR|ERVK	28255	NR_130989	78086		NR_130989	ENSMUSG00000085619	4930555B12Rik	-	RIKEN cDNA 4930555B12 gene	ncRNA
upeaks-4084	chr10	52293267	52293494	+	0	NA	intron (NM_001347444, intron 4 of 9)	intron (NM_001347444, intron 4 of 9)	59761	NM_025705	66686	Mm.62982	NM_025705	ENSMUSG00000019891	Dcbld1	4631413K11Rik	discoidin, CUB and LCCL domain containing 1	protein-coding
upeaks-22760	chr19	28465996	28466195	+	0	NA	intron (NM_001305671, intron 3 of 9)	L3|LINE|CR1	-212129	NR_045330	320176	Mm.406716	NR_045330	ENSMUSG00000097735	D930032P07Rik	-	RIKEN cDNA D930032P07 gene	ncRNA
upeaks-28840	chr3	94957295	94957510	+	0	NA	intron (NM_017395, intron 7 of 8)	PB1|SINE|Alu	2387	NM_017395	53970	Mm.24308	NM_017395	ENSMUSG00000005774	Rfx5	-	regulatory factor X, 5 (influences HLA class II expression)	protein-coding
upeaks-13990	chr14	46639590	46639800	+	0	NA	Intergenic	Intergenic	-2272	NR_046460	74458	Mm.390708	NR_046460		4933425B07Rik	-	RIKEN cDNA 4933425B07 gene	ncRNA
upeaks-8627	chr11	108897663	108897914	+	0	NA	Intergenic	Intergenic	-22561	NM_015732	12006	Mm.71710	NM_015732	ENSMUSG00000000142	Axin2	Axi1|Axil|Conductin	axin 2	protein-coding
upeaks-6708	chr11	49781899	49782390	+	0	NA	Intergenic	RMER15|LTR|ERVL	-12011	NM_013529	14584	Mm.24402	NM_013529	ENSMUSG00000020363	Gfpt2	AI480523|GFAT2	glutamine fructose-6-phosphate transaminase 2	protein-coding
upeaks-2375	chr1	159517496	159518151	+	0	NA	Intergenic	Intergenic	-5946	NM_022312	21960	Mm.44701	NM_022312	ENSMUSG00000015829	Tnr	J1-tenascin|TN-R|janusin|restrictin	tenascin R	protein-coding
upeaks-3342	chr10	3941208	3941772	+	0	NA	intron (NM_001033253, intron 10 of 15)	intron (NM_001033253, intron 10 of 15)	-31585	NM_001170786	270685	Mm.184752	NM_172308	ENSMUSG00000040675	Mthfd1l	2410004L15Rik|AI647056|Fthfsdc1	methylenetetrahydrofolate dehydrogenase (NADP+ dependent) 1-like	protein-coding
upeaks-38042	chr6	98872333	98872698	+	0	NA	Intergenic	Intergenic	155783	NM_001197322	108655	Mm.234965	NM_053202	ENSMUSG00000030067	Foxp1	3110052D19Rik|4932443N09Rik|AI461938|AW494214	forkhead box P1	protein-coding
upeaks-293	chr1	29141625	29141907	+	0	NA	Intergenic	Lx|LINE|L1	-279722	NR_105760	102465174		NR_105760	ENSMUSG00000099257	Mir6342	Gm27268|mmu-mir-6342	microRNA 6342	ncRNA
upeaks-40967	chr7	98423563	98423860	+	0	NA	Intergenic	Intergenic	-16705	NM_001130693	14918	Mm.389928	NM_001034890	ENSMUSG00000074003	Gucy2d	-	guanylate cyclase 2d	protein-coding
upeaks-26390	chr2	144217302	144217501	+	0	NA	Intergenic	Intergenic	-28111	NR_136884	433481	Mm.330630	NR_136884	ENSMUSG00000074758	Gm5535	EG433481	predicted gene 5535	ncRNA
upeaks-13339	chr14	8233292	8233591	+	0	NA	intron (NM_001161667, intron 13 of 14)	intron (NM_001161667, intron 13 of 14)	17193	NM_001305937	71393	Mm.292712	NM_027782	ENSMUSG00000021752	Kctd6	5430433B02Rik|AU044285	potassium channel tetramerisation domain containing 6	protein-coding
upeaks-43381	chr8	72169808	72170059	+	0	NA	intron (NM_023126, intron 2 of 7)	intron (NM_023126, intron 2 of 7)	8733	NM_023126	17274	Mm.162811	NM_023126	ENSMUSG00000003037	Rab8a	AA409338|Mel	RAB8A, member RAS oncogene family	protein-coding
upeaks-13598	chr14	23491460	23491686	+	0	NA	intron (NM_001253373, intron 13 of 27)	CR1_Mam|LINE|CR1	-397002	NR_033550	791307	Mm.364384	NR_033550	ENSMUSG00000068680	Gm10248	ENSMUSG00000068680	predicted gene 10248	ncRNA
upeaks-22466	chr19	7606261	7606505	+	0	NA	intron (NM_019516, intron 1 of 8)	intron (NM_019516, intron 1 of 8)	793	NM_019516	56072	Mm.298242	NM_019516	ENSMUSG00000024972	Lgals12	AW987437|Grip1	lectin, galactose binding, soluble 12	protein-coding
upeaks-17592	chr16	29489287	29489486	+	0	NA	intron (NM_172613, intron 2 of 29)	intron (NM_172613, intron 2 of 29)	52097	NM_001164612	224079	Mm.54954	NM_172613	ENSMUSG00000038094	Atp13a4	4631413J11Rik|4832416L12|9330174J19Rik	ATPase type 13A4	protein-coding
upeaks-35838	chr5	134135890	134136089	+	0	NA	intron (NM_030719, intron 4 of 8)	intron (NM_030719, intron 4 of 8)	36241	NM_030719	80909	Mm.45218	NM_030719	ENSMUSG00000015944	Gatsl2	7530428J21Rik|AW742413|Gats|Gatsl1	GATS protein-like 2	protein-coding
upeaks-20205	chr17	69098101	69098300	+	0	NA	Intergenic	Intergenic	-58610	NM_013813	13823	Mm.131135	NM_013813	ENSMUSG00000024044	Epb41l3	4.1B|DAL1P|Dal1|Epb4.1l3|NBL3	erythrocyte membrane protein band 4.1 like 3	protein-coding
upeaks-46412	chr9	83686546	83686745	+	0	NA	Intergenic	Intergenic	-4830	NR_046066	100039222	Mm.405596	NR_046066	ENSMUSG00000100155	Gm2109	-	predicted gene 2109	ncRNA
upeaks-14896	chr14	103804273	103804620	+	0	NA	Intergenic	L1_Mur3|LINE|L1	39255	NM_007904	13618	Mm.229532	NM_007904	ENSMUSG00000022122	Ednrb	ET-B|ET-BR|ETR-b|ETb|Sox10m1	endothelin receptor type B	protein-coding
upeaks-32360	chr4	126104149	126104348	+	0	NA	intron (NM_028800, intron 1 of 10)	CpG	291	NM_028800	74178	Mm.440269	NM_028800	ENSMUSG00000042608	Stk40	2310004N11Rik|AI428792	serine/threonine kinase 40	protein-coding
upeaks-39174	chr6	148281991	148282197	+	0	NA	intron (NM_001347518, intron 10 of 18)	PB1D10|SINE|Alu	-69720	NM_001286560	67456	Mm.59812	NM_026168	ENSMUSG00000030304	Ergic2	1200009B18Rik|4930572C01Rik|AA408438|Ptx1	ERGIC and golgi 2	protein-coding
upeaks-21430	chr18	49946988	49947297	+	0	NA	intron (NM_001081371, intron 37 of 42)	intron (NM_001081371, intron 37 of 42)	-32285	NM_001177759	106869	Mm.27740	NM_134131	ENSMUSG00000062210	Tnfaip8	AA987150|E130304C20Rik|ENSMUSG00000073567|Gg2-1|Gm10539|Nded|Ssc-2|Tipe	tumor necrosis factor, alpha-induced protein 8	protein-coding
upeaks-17404	chr16	18551605	18551831	+	0	NA	intron (NR_104347, intron 7 of 8)	intron (NR_104347, intron 7 of 8)	35251	NM_001285476	21380	Mm.295194	NM_011532	ENSMUSG00000009097	Tbx1	-	T-box 1	protein-coding
upeaks-12477	chr13	74735950	74736150	+	0	NA	intron (NM_001301153, intron 15 of 31)	intron (NM_001301153, intron 15 of 31)	-1789	NM_001301158	12380	Mm.29163	NM_009817	ENSMUSG00000021585	Cast	-	calpastatin	protein-coding
upeaks-29823	chr3	135756863	135757119	+	0	NA	Intergenic	Intergenic	-65444	NM_008689	18033	Mm.256765	NM_008689	ENSMUSG00000028163	Nfkb1	NF-KB1|NF-kappaB|NF-kappaB1|p105|p50|p50/p105	nuclear factor of kappa light polypeptide gene enhancer in B cells 1, p105	protein-coding
upeaks-31488	chr4	86955229	86955984	+	0	NA	Intergenic	Intergenic	81192	NM_139306	230379	Mm.45019	NM_139306	ENSMUSG00000038007	Acer2	2410116I05Rik|Asah3l|CRG-L1|maCER2	alkaline ceramidase 2	protein-coding
upeaks-6734	chr11	50486010	50486209	+	0	NA	Intergenic	L1MA6|LINE|L1	-54998	NM_172557	216724	Mm.390400	NM_172557	ENSMUSG00000020375	Rufy1	3000002E04Rik|Rabip4|ZFYVE12	RUN and FYVE domain containing 1	protein-coding
upeaks-17610	chr16	29954454	29954716	+	0	NA	Intergenic	Intergenic	24539	NR_037689	328657	Mm.425982	NM_001033403		Gm1968	-	predicted gene 1968	ncRNA
upeaks-46150	chr9	70331991	70332396	+	0	NA	intron (NM_181072, intron 9 of 27)	intron (NM_181072, intron 9 of 27)	73560	NR_049200	100885839		NR_049200	ENSMUSG00000093763	Mir5626	Gm25590|mir-5626|mmu-mir-5626	microRNA 5626	ncRNA
upeaks-29000	chr3	98348774	98349043	+	0	NA	Intergenic	Intergenic	-8939	NM_016966	236539	Mm.16898	NM_016966	ENSMUSG00000053398	Phgdh	3-PGDH|3PGDH|4930479N23|A10|PGAD|PGD|PGDH|SERA	3-phosphoglycerate dehydrogenase	protein-coding
upeaks-25105	chr2	83759371	83760059	+	0	NA	intron (NM_008402, intron 4 of 29)	intron (NM_008402, intron 4 of 29)	35318	NM_008402	16410	Mm.227	NM_008402	ENSMUSG00000027087	Itgav	1110004F14Rik|2610028E01Rik|CD51|D430040G12Rik	integrin alpha V	protein-coding
upeaks-3553	chr10	17697811	17698072	+	0	NA	Intergenic	Intergenic	-25287	NM_010828	17684	Mm.272321	NM_010828	ENSMUSG00000039910	Cited2	AI835299|ER154-like|Mrg1|Msg2|p35srj	Cbp/p300-interacting transactivator, with Glu/Asp-rich carboxy-terminal domain, 2	protein-coding
upeaks-29572	chr3	125228300	125228553	+	0	NA	Intergenic	(GAATG)n|Simple_repeat|Simple_repeat	-175665	NM_022565	64580	Mm.444289	NM_022565	ENSMUSG00000027971	Ndst4	4930439H17Rik	N-deacetylase/N-sulfotransferase (heparin glucosaminyl) 4	protein-coding
upeaks-30762	chr4	37821207	37821488	+	0	NA	Intergenic	Lx3A|LINE|L1	-869603	NM_001165999	242384	Mm.132507	NM_175516	ENSMUSG00000045083	Lingo2	B230217C06Rik|Lern3|Lrrn6c	leucine rich repeat and Ig domain containing 2	protein-coding
upeaks-48292	chrX	159676287	159676486	+	0	NA	intron (NM_001135727, intron 1 of 17)	intron (NM_001135727, intron 1 of 17)	-32215	NR_110970	58194	Mm.286495	NM_021389	ENSMUSG00000040990	Sh3kbp1	1200007H22Rik|1700125L08Rik|5830464D22Rik|AI447724|Cin85|IN85|Ruk|Seta	SH3-domain kinase binding protein 1	protein-coding
upeaks-28343	chr3	68506941	68507176	+	0	NA	intron (NM_001113419, intron 5 of 10)	PB1|SINE|Alu	12877	NM_001282044	30953	Mm.331064	NM_013928	ENSMUSG00000027777	Schip1	Nf2ip|Schip-1	schwannomin interacting protein 1	protein-coding
upeaks-34223	chr5	47916437	47916693	+	0	NA	Intergenic	Lx2A1|LINE|L1	-66590	NM_001291228	20563	Mm.289739	NM_178804	ENSMUSG00000031558	Slit2	Drad-1|E030015M03Rik|E130320P19Rik|Slil3|mKIAA4141|slit-2	slit homolog 2 (Drosophila)	protein-coding
upeaks-43393	chr8	72517688	72517929	+	0	NA	intron (NM_027485, intron 1 of 2)	RMER17A2|LTR|ERVK	-25194	NM_177766	270066	Mm.291461	NM_177766	ENSMUSG00000019731	Slc35e1	6030458H05|AA408278	solute carrier family 35, member E1	protein-coding
upeaks-13036	chr13	108646812	108647011	+	0	NA	Intergenic	(TTCTG)n|Simple_repeat|Simple_repeat	-7266	NM_011056	238871	Mm.434429	NM_011056	ENSMUSG00000021699	Pde4d	9630011N22Rik|Dpde3	phosphodiesterase 4D, cAMP specific	protein-coding
upeaks-45293	chr9	35359709	35360003	+	0	NA	Intergenic	Intergenic	78751	NR_040715	71133	Mm.158577	NR_040715	ENSMUSG00000111746	4933422A05Rik	-	RIKEN cDNA 4933422A05 gene	ncRNA
upeaks-40562	chr7	75826770	75826969	+	0	NA	Intergenic	Intergenic	-21469	NM_029652	207952	Mm.206223	NM_029652	ENSMUSG00000055652	Klhl25	2810402K13Rik|BC027373|Enc-1	kelch-like 25	protein-coding
upeaks-37399	chr6	66160836	66161053	+	0	NA	Intergenic	Intergenic	-111561	NR_136927	102633773	Mm.272086	NR_136927	ENSMUSG00000107653	Gm31520	-	sterol-C5-desaturase pseudogene	pseudo
upeaks-31833	chr4	106870687	106870954	+	0	NA	Intergenic	Intergenic	-40650	NM_198438	72475	Mm.195635	NM_023672	ENSMUSG00000061887	Ssbp3	2610021L12Rik|2610200M23Rik|5730488C10Rik|AI854733|AW551939|LAST|SSDP1	single-stranded DNA binding protein 3	protein-coding
upeaks-34324	chr5	57733624	57733844	+	0	NA	intron (NM_001310608, intron 1 of 3)	intron (NM_001310608, intron 1 of 3)	15653	NM_001310608	54216	Mm.332387	NM_018764	ENSMUSG00000029108	Pcdh7	-	protocadherin 7	protein-coding
upeaks-3842	chr10	36506063	36506311	+	0	NA	promoter-TSS (NM_001253356)	promoter-TSS (NM_001253356)	-620	NM_001253355	319415	Mm.332442	NM_001081208	ENSMUSG00000044499	Hs3st5	D930005L05Rik|Gm1151|Hs3ost5	heparan sulfate (glucosamine) 3-O-sulfotransferase 5	protein-coding
upeaks-962	chr1	74749395	74749662	+	0	NA	promoter-TSS (NM_153744)	promoter-TSS (NM_153744)	-573	NM_153744	241113	Mm.166501	NM_153744	ENSMUSG00000006542	Prkag3	AMPKg3L|AMPKg3S|Amkg3|Ampkg3	protein kinase, AMP-activated, gamma 3 non-catatlytic subunit	protein-coding
upeaks-26576	chr2	151783599	151783801	+	0	NA	Intergenic	(CAG)n|Simple_repeat|Simple_repeat	-32235	NR_138569	75283	Mm.195735	NM_029235		4930556L07Rik	1700020P01Rik|4930593I08Rik	RIKEN cDNA 4930556L07 gene	ncRNA
upeaks-45035	chr9	21250167	21250428	+	0	NA	Intergenic	Intergenic	-1854	NM_053190	94226	Mm.190619	NM_053190	ENSMUSG00000045087	S1pr5	Edg8|S1P5|lpB4	sphingosine-1-phosphate receptor 5	protein-coding
upeaks-29751	chr3	132666578	132667029	+	0	NA	intron (NM_007926, intron 6 of 6)	MLTR11A|LTR|ERVK	17076	NM_007926	13722	Mm.235137	NM_007926	ENSMUSG00000028029	Aimp1	9830137A06Rik|AIMP1/p43|EMAPII|Emap2|Scye1|p43	aminoacyl tRNA synthetase complex-interacting multifunctional protein 1	protein-coding
upeaks-12724	chr13	92672383	92672606	+	0	NA	intron (NM_172588, intron 2 of 11)	intron (NM_172588, intron 2 of 11)	61356	NM_172588	218442	Mm.297970	NM_172588	ENSMUSG00000021703	Serinc5	A130038L21Rik|AIGP3|C86123|TPO1	serine incorporator 5	protein-coding
upeaks-42464	chr8	18381686	18381993	+	0	NA	Intergenic	Intergenic	-213334	NM_173189	244329	Mm.235296	NM_173189	ENSMUSG00000039842	Mcph1	5430437K10Rik|BRIT1|D030046N04Rik|MCT	microcephaly, primary autosomal recessive 1	protein-coding
upeaks-21281	chr18	38576130	38576439	+	0	NA	Intergenic	Intergenic	24984	NM_011898	24066	Mm.42038	NM_011898	ENSMUSG00000024427	Spry4	A030006O18Rik|sprouty4	sprouty homolog 4 (Drosophila)	protein-coding
upeaks-22876	chr19	36371438	36371763	+	0	NA	Intergenic	Intergenic	-7467	NM_029508	76073	Mm.259180	NM_029508	ENSMUSG00000024805	Pcgf5	0610009F02Rik|1110054A01Rik|5830406C17Rik|5830443C21Rik|9530023M17Rik|AI324127	polycomb group ring finger 5	protein-coding
upeaks-44692	chr8	125523299	125523570	+	0	NA	Intergenic	Intergenic	-30724	NM_001081337	244668	Mm.271668	NM_001081337	ENSMUSG00000001995	Sipa1l2	BC058408|mKIAA1389	signal-induced proliferation-associated 1 like 2	protein-coding
upeaks-38440	chr6	119085473	119085787	+	0	NA	intron (NM_001255998, intron 1 of 47)	MER117|DNA|hAT-Charlie	22865	NM_001159533	12288	Mm.41628	NM_009781	ENSMUSG00000051331	Cacna1c	Cav1.2|Cchl1a1|D930026N18Rik|MBC|MELC-CC	calcium channel, voltage-dependent, L type, alpha 1C subunit	protein-coding
upeaks-21681	chr18	62947625	62948074	+	0	NA	intron (NM_133237, intron 3 of 4)	intron (NM_133237, intron 3 of 4)	25522	NM_133237	494504	Mm.391102	NM_133237	ENSMUSG00000071847	Apcdd1	AB023957|AU041258|Drapc1|EIG180	adenomatosis polyposis coli down-regulated 1	protein-coding
upeaks-34491	chr5	72411894	72412331	+	0	NA	intron (NM_016869, intron 5 of 21)	intron (NM_016869, intron 5 of 21)	92096	NM_016869	53419	Mm.332425	NM_016869	ENSMUSG00000005220	Corin	AV273130|Lrp4	corin	protein-coding
upeaks-5190	chr10	100264102	100264432	+	0	NA	Intergenic	Intergenic	-71409	NM_001166637	100043224	Mm.478257	NM_001166637	ENSMUSG00000094314	Gm4301	-	predicted gene 4301	protein-coding
upeaks-45567	chr9	47400546	47400821	+	0	NA	Intergenic	Intergenic	-129487	NM_001310841	54725	Mm.234832	NM_018770	ENSMUSG00000032076	Cadm1	2900073G06Rik|3100001I08Rik|AI987920|Bl2|Igsf4|Igsf4a|Necl2|RA175|RA175A|RA175B|RA175C|RA175N|ST17|SgIGSF|SynCam|Tslc1	cell adhesion molecule 1	protein-coding
upeaks-15611	chr15	38570144	38570368	+	0	NA	intron (NR_045757, intron 2 of 2)	B1F|SINE|Alu	24678	NR_045757	69679	Mm.416890	NR_045757	ENSMUSG00000102106	2310043O21Rik	-	RIKEN cDNA 2310043O21 gene	ncRNA
upeaks-38155	chr6	103461942	103462235	+	0	NA	Intergenic	Intergenic	-48788	NM_007697	12661	Mm.251288	NM_007697	ENSMUSG00000030077	Chl1	A530023M13Rik|AI465420|CALL|LICAM2	cell adhesion molecule L1-like	protein-coding
upeaks-21355	chr18	44596700	44596899	+	0	NA	intron (NM_001085373, intron 3 of 18)	intron (NM_001085373, intron 3 of 18)	-64866	NR_026853	626275	Mm.427116	NR_026853	ENSMUSG00000097610	A930012L18Rik	-	RIKEN cDNA A930012L18 gene	ncRNA
upeaks-43482	chr8	78706212	78706411	+	0	NA	intron (NR_104094, intron 8 of 9)	intron (NR_104094, intron 8 of 9)	114841	NM_030145	78651	Mm.28694	NM_030145	ENSMUSG00000031683	Lsm6	1500031N17Rik|2410088K19Rik|AI747288	LSM6 homolog, U6 small nuclear RNA and mRNA degradation associated	protein-coding
upeaks-37494	chr6	72330211	72330411	+	0	NA	intron (NM_138592, intron 7 of 12)	PB1D10|SINE|Alu	14864	NM_138592	28035	Mm.281900	NM_138592	ENSMUSG00000056305	Usp39	AA408960|AI894154|CGI-21|D6Wsu157e|SAD1	ubiquitin specific peptidase 39	protein-coding
upeaks-23348	chr19	55522989	55523206	+	0	NA	intron (NM_001293686, intron 7 of 7)	L2c|LINE|L2	179107	NR_045318	77594	Mm.329924	NR_045318	ENSMUSG00000097632	4930552P12Rik	-	RIKEN cDNA 4930552P12 gene	ncRNA
upeaks-23697	chr2	15743446	15743805	+	0	NA	intron (NM_001310455, intron 17 of 38)	Lx8|LINE|L1	217146	NM_001310455	102635496		NM_001310455	ENSMUSG00000075520	Malrd1	-	MAM and LDL receptor class A domain containing 1	protein-coding
upeaks-34337	chr5	58193448	58193782	+	0	NA	Intergenic	RLTR30D2_MM|LTR|ERV1	259383	NR_046190	78163	Mm.243828	NR_046190	ENSMUSG00000105234	4930459L07Rik	-	RIKEN cDNA 4930459L07 gene	ncRNA
upeaks-47733	chrX	71763993	71764207	+	0	NA	Intergenic	MIR|SINE|MIR	-51980	NM_001290781	67048	Mm.41102	NM_001081356	ENSMUSG00000073131	Vma21	2610030H06Rik|AI840175	VMA21 vacuolar H+-ATPase homolog (S. cerevisiae)	protein-coding
upeaks-44943	chr9	14634144	14634514	+	0	NA	Intergenic	Intergenic	-19329	NM_001081395	75723	Mm.159552	NM_001081395	ENSMUSG00000013076	Amotl1	2310010G08Rik|2310067L22Rik|4932416D09Rik|JEAP|mFLJ00155	angiomotin-like 1	protein-coding
upeaks-1910	chr1	133474303	133474660	+	0	NA	Intergenic	ORR1B1|LTR|ERVL-MaLR	-50269	NM_011439	20668	Mm.8575	NM_011439	ENSMUSG00000070643	Sox13	AA407916|AW259412|AW540933|Sox-13	SRY (sex determining region Y)-box 13	protein-coding
upeaks-10430	chr12	89436684	89436900	+	0	NA	intron (NM_172544, intron 8 of 19)	intron (NM_172544, intron 8 of 19)	-375691	NM_001252074	18191	Mm.425766	NM_172544	ENSMUSG00000066392	Nrxn3	-	neurexin III	protein-coding
upeaks-2857	chr1	178408975	178409303	+	0	NA	intron (NM_026626, intron 1 of 6)	intron (NM_026626, intron 1 of 6)	3258	NM_026626	68226	Mm.252132	NM_026626	ENSMUSG00000026495	Efcab2	1700073K01Rik|D830011E08Rik	EF-hand calcium binding domain 2	protein-coding
upeaks-31401	chr4	82705428	82705769	+	0	NA	Intergenic	Intergenic	154063	NM_026647	68268	Mm.32047	NM_026647	ENSMUSG00000028403	Zdhhc21	9130404H11Rik|AL024349|D130004H04Rik|dep	zinc finger, DHHC domain containing 21	protein-coding
upeaks-46402	chr9	83537972	83538214	+	0	NA	Intergenic	Intergenic	-10245	NM_172507	212531	Mm.491246	NM_172507	ENSMUSG00000032261	Sh3bgrl2	A930014C21Rik|AA408038|B930089I21	SH3 domain binding glutamic acid-rich protein like 2	protein-coding
upeaks-42586	chr8	25066921	25067155	+	0	NA	intron (NM_031257, intron 3 of 11)	(GGCTG)n|Simple_repeat|Simple_repeat	-28076	NM_001081187	330723	Mm.334452	NM_001081187	ENSMUSG00000037406	Htra4	B430206E18Rik	HtrA serine peptidase 4	protein-coding
upeaks-27163	chr2	168791203	168791545	+	0	NA	Intergenic	Intergenic	-24173	NM_175303	99377	Mm.434054	NM_175303	ENSMUSG00000027547	Sall4	5730441M18Rik|AA407717|AL022809|AW536104|C330011P20Rik|C78083|C78563|Tex20	sal-like 4 (Drosophila)	protein-coding
upeaks-44021	chr8	104250712	104251326	+	0	NA	non-coding (NR_104433, exon 1 of 5)	non-coding (NR_104433, exon 1 of 5)	158	NM_029295	75458	Mm.269219	NM_029295	ENSMUSG00000054400	Cklf	1700001C14Rik|1810018M11Rik|A730028G07Rik|C32|CKLF1|CKLF3|CKLF4|CKLF5|Cklf2|Cklf6|HSPC224|UCK-1	chemokine-like factor	protein-coding
upeaks-37232	chr6	52861993	52862236	+	0	NA	intron (NM_173406, intron 2 of 4)	intron (NM_173406, intron 2 of 4)	47506	NM_001168277	231986	Mm.386865	NM_173406	ENSMUSG00000063568	Jazf1	AI591476|C820002C15|Jaz1|Tip27	JAZF zinc finger 1	protein-coding
upeaks-15427	chr15	27009154	27009475	+	0	NA	Intergenic	Intergenic	-113750	NM_176959	448987	Mm.253378	NM_176959	ENSMUSG00000043556	Fbxl7	AL023057|D230018M15Rik|FBL7|Fbl6	F-box and leucine-rich repeat protein 7	protein-coding
upeaks-1568	chr1	114849691	114849968	+	0	NA	Intergenic	RLTR9B2|LTR|ERVK	-835308	NM_001077425	636808	Mm.101576	NM_001077425	ENSMUSG00000070695	Cntnap5a	Caspr5-1|EG636808	contactin associated protein-like 5A	protein-coding
upeaks-24301	chr2	34669354	34669553	+	0	NA	Intergenic	Intergenic	85779	NM_025709	66691	Mm.156452	NM_025709	ENSMUSG00000026867	Gapvd1	2010005B09Rik|4432404J10Rik|AW108497|Gapex-5|RAP6|RME-6|mKIAA1521	GTPase activating protein and VPS9 domains 1	protein-coding
upeaks-196	chr1	19104677	19104881	+	0	NA	exon (NM_153154, exon 2 of 8)	exon (NM_153154, exon 2 of 8)	1757	NM_153154	226896	Mm.244858	NM_153154	ENSMUSG00000042596	Tfap2d	Tcfap2d	transcription factor AP-2, delta	protein-coding
upeaks-22957	chr19	40678452	40678805	+	0	NA	intron (NM_009848, intron 1 of 9)	intron (NM_009848, intron 1 of 9)	18858	NM_009848	12495	Mm.2824	NM_009848	ENSMUSG00000048120	Entpd1	2610206B08Rik|AA408691|Cd39|NTPDase-1	ectonucleoside triphosphate diphosphohydrolase 1	protein-coding
upeaks-13394	chr14	13411712	13412013	+	0	NA	intron (NM_028052, intron 2 of 5)	intron (NM_028052, intron 2 of 5)	-42096	NM_001163032	72003	Mm.317515	NM_028052	ENSMUSG00000056296	Synpr	1500003F20Rik|SPO	synaptoporin	protein-coding
upeaks-27281	chr2	173087365	173087801	+	0	NA	Intergenic	Intergenic	31942	NM_001081387	664799	Mm.389396	NM_001081387	ENSMUSG00000070495	Ctcfl	Boris|OTTMUSG00000016680	CCCTC-binding factor (zinc finger protein)-like	protein-coding
upeaks-30322	chr3	158905747	158905946	+	0	NA	Intergenic	Intergenic	-170518	NR_040750	624759	Mm.491054	NR_040750	ENSMUSG00000106053	Gm20752	-	predicted gene, 20752	ncRNA
upeaks-29144	chr3	104372429	104372740	+	0	NA	Intergenic	Intergenic	139334	NM_001310698	269473	Mm.34855	NM_001025067	ENSMUSG00000032913	Lrig2	4632419I10Rik|BB096938|LIG-2	leucine-rich repeats and immunoglobulin-like domains 2	protein-coding
upeaks-45242	chr9	32335749	32336141	+	0	NA	intron (NM_010605, intron 2 of 3)	intron (NM_010605, intron 2 of 3)	8292	NM_010605	16521	Mm.69472	NM_010605	ENSMUSG00000032034	Kcnj5	GIRK4|Kir3.4	potassium inwardly-rectifying channel, subfamily J, member 5	protein-coding
upeaks-29875	chr3	138334313	138334614	+	0	NA	Intergenic	Intergenic	21177	NM_026945	69117	Mm.46265	NM_026945	ENSMUSG00000053054	Adh6a	1810009C16Rik|Adh5a	alcohol dehydrogenase 6A (class V)	protein-coding
upeaks-22714	chr19	24756513	24756889	+	0	NA	intron (NM_175013, intron 6 of 10)	intron (NM_175013, intron 6 of 10)	82693	NM_183160	226040	Mm.391170	NM_183160	ENSMUSG00000048572	Tmem252	E030010A14Rik	transmembrane protein 252	protein-coding
upeaks-18205	chr16	64885194	64885491	+	0	NA	Intergenic	RMER10A|LTR|ERVL	33257	NM_178647	106143	Mm.10160	NM_178647	ENSMUSG00000054604	Cggbp1	AA960172|AL023996|AW045841	CGG triplet repeat binding protein 1	protein-coding
upeaks-4274	chr10	61570040	61570484	+	0	NA	intron (NM_153542, intron 4 of 4)	intron (NM_153542, intron 4 of 4)	-25222	NM_001177511	237362	Mm.131297	NM_001177511	ENSMUSG00000020090	Npffr1	Gm236|Gpr147|NPFF1|NPFF1R|OT7T022	neuropeptide FF receptor 1	protein-coding
upeaks-42950	chr8	47218670	47218877	+	0	NA	intron (NM_175162, intron 1 of 4)	intron (NM_175162, intron 1 of 4)	70629	NM_001114311	71069	Mm.23973	NM_175162	ENSMUSG00000038143	Stox2	4933409N07Rik|AI449080|AI835114|mKIAA1392	storkhead box 2	protein-coding
upeaks-44018	chr8	104191460	104191852	+	0	NA	intron (NM_001141922, intron 3 of 6)	intron (NM_001141922, intron 3 of 6)	21143	NM_001141925	65115	Mm.41849	NM_001141922	ENSMUSG00000031872	Bean1	Bean	brain expressed, associated with Nedd4, 1	protein-coding
upeaks-28099	chr3	52640841	52641084	+	0	NA	Intergenic	Intergenic	-98762	NR_038079	329639	Mm.131245	NR_038079	ENSMUSG00000102785	Gm2447	100039832|A530017F20	predicted gene 2447	ncRNA
upeaks-24569	chr2	52378418	52378634	+	0	NA	Intergenic	MTC|LTR|ERVL-MaLR	-39728	NM_010889	17996	Mm.389247	NM_010889	ENSMUSG00000026950	Neb	AI595938	nebulin	protein-coding
upeaks-29125	chr3	103538266	103538527	+	0	NA	Intergenic	Intergenic	-36886	NM_001276679	54524	Mm.88818	NM_018800	ENSMUSG00000027849	Syt6	3110037A08Rik|AW048930|sytVI	synaptotagmin VI	protein-coding
upeaks-16898	chr15	99352228	99352652	+	0	NA	intron (NM_001310622, intron 1 of 25)	intron (NM_001310622, intron 1 of 25)	18042	NM_011711	22379	Mm.29043	NM_011711	ENSMUSG00000023008	Fmnl3	2700073B04Rik|FBP11|Wbp3|mKIAA2014	formin-like 3	protein-coding
upeaks-27955	chr3	40002927	40003151	+	0	NA	Intergenic	PB1|SINE|Alu	519873	NR_040445	100040882	Mm.272869	NR_040445	ENSMUSG00000037884	1700017G19Rik	-	RIKEN cDNA 1700017G19 gene	ncRNA
upeaks-10512	chr12	98147127	98147431	+	0	NA	Intergenic	Intergenic	112180	NM_008079	14420	Mm.5120	NM_008079	ENSMUSG00000021003	Galc	2310068B06Rik|A930008M05Rik|AW212969|AW413532|Gacy|twi|twitcher	galactosylceramidase	protein-coding
upeaks-12641	chr13	88361320	88361574	+	0	NA	Intergenic	Lx|LINE|L1	-460025	NM_001037987	13612	Mm.125580	NM_010103	ENSMUSG00000034488	Edil3	Del-1|Del1	EGF-like repeats and discoidin I-like domains 3	protein-coding
upeaks-8476	chr11	103712082	103712545	+	0	NA	intron (NR_102389, intron 2 of 2)	intron (NR_102389, intron 2 of 2)	14589	NR_102389	399609	Mm.351922	NR_102388		C130046K22Rik	-	RIKEN cDNA C130046K22 gene	ncRNA
upeaks-3305	chr1	194679180	194679442	+	0	NA	intron (NM_008882, intron 3 of 31)	intron (NM_008882, intron 3 of 31)	59482	NM_008882	18845	Mm.2251	NM_008882	ENSMUSG00000026640	Plxna2	2810428A13Rik|AA589422|AW457381|OCT|PlexA2|Plxn2|mKIAA0463	plexin A2	protein-coding
upeaks-2853	chr1	178346930	178347130	+	0	NA	Intergenic	B1F2|SINE|Alu	-9246	NM_016805	51810	Mm.86589	NM_016805	ENSMUSG00000039630	Hnrnpu	AA408410|AI256620|AL024194|AL024437|AW557595|C86794|Hnrpu|SAFA|Sp120|hnRNP U	heterogeneous nuclear ribonucleoprotein U	protein-coding
upeaks-26334	chr2	141876318	141876830	+	0	NA	intron (NM_001013802, intron 8 of 18)	intron (NM_001013802, intron 8 of 18)	1024890	NM_001081133	16558	Mm.251934	NM_001081133	ENSMUSG00000038844	Kif16b	8430434E15Rik|AA623607|AI789011|C80253|C80902|mKIAA1590	kinesin family member 16B	protein-coding
upeaks-21765	chr18	66366697	66366896	+	0	NA	Intergenic	Intergenic	-74958	NM_178793	320924	Mm.442049	NM_178793	ENSMUSG00000046318	Ccbe1	4933426F18Rik|9430093N24Rik|mKIAA1983	collagen and calcium binding EGF domains 1	protein-coding
upeaks-2185	chr1	152009729	152009934	+	0	NA	intron (NM_197990, intron 1 of 5)	PB1|SINE|Alu	80489	NM_197990	69399	Mm.278031	NM_197990	ENSMUSG00000032666	1700025G04Rik	2610510E02Rik|2900042O04Rik|ENSMUSG00000073540	RIKEN cDNA 1700025G04 gene	protein-coding
upeaks-13397	chr14	13732305	13732544	+	0	NA	Intergenic	RLTR9C|LTR|ERVK	61548	NM_177624	218739	Mm.39919	NM_177624	ENSMUSG00000044772	Sntn	A430083B19Rik	sentan, cilia apical structure protein	protein-coding
upeaks-29350	chr3	113649615	113649814	+	0	NA	Intergenic	Intergenic	-19565	NM_001287015	67225	Mm.316928	NM_026043	ENSMUSG00000027981	Rnpc3	2810441O16Rik|AI447568|C030014B17Rik	RNA-binding region (RNP1, RRM) containing 3	protein-coding
upeaks-15393	chr15	25555989	25556188	+	0	NA	Intergenic	Intergenic	-66462	NM_019472	17909	Mm.60590	NM_019472	ENSMUSG00000022272	Myo10	AW048724|D15Ertd600e|mKIAA0799|myosin-X	myosin X	protein-coding
upeaks-2300	chr1	156184175	156184559	+	0	NA	intron (NM_177838, intron 1 of 4)	intron (NM_177838, intron 1 of 4)	20659	NM_177838	329274	Mm.150857	NM_177838	ENSMUSG00000015484	Fam163a	A230106N23Rik	family with sequence similarity 163, member A	protein-coding
upeaks-31073	chr4	56471385	56471584	+	0	NA	Intergenic	PB1D10|SINE|Alu	269941	NM_025271	11471	Mm.251434	NM_025271	ENSMUSG00000070980	Actl7b	Tact1	actin-like 7b	protein-coding
upeaks-46128	chr9	68913880	68914079	+	0	NA	intron (NM_013646, intron 1 of 10)	PB1D11|SINE|Alu	148633	NR_033299	320440	Mm.483129	NM_177159		9530091C08Rik	-	RIKEN cDNA 9530091C08 gene	ncRNA
upeaks-18149	chr16	58703874	58704166	+	0	NA	Intergenic	Intergenic	14704	NM_001162955	71223	Mm.359970	NM_001162955	ENSMUSG00000047293	Gpr15	4933439K08Rik	G protein-coupled receptor 15	protein-coding
upeaks-7369	chr11	71697162	71697431	+	0	NA	Intergenic	LTR103b_Mam|LTR|ERV1?	-53407	NM_177618	216881	Mm.48648	NM_177618	ENSMUSG00000020811	Wscd1	mKIAA0523	WSC domain containing 1	protein-coding
upeaks-7038	chr11	60895958	60896334	+	0	NA	Intergenic	Intergenic	-17108	NM_001168507	216821	Mm.28063	NM_173453	ENSMUSG00000043284	Tmem11	5730466P16Rik|AA409091	transmembrane protein 11	protein-coding
upeaks-42631	chr8	26526645	26526890	+	0	NA	Intergenic	Intergenic	297656	NR_045904	72316	Mm.490534	NR_045904	ENSMUSG00000100335	2310008N11Rik	-	RIKEN cDNA 2310008N11 gene	ncRNA
upeaks-21552	chr18	58161976	58162440	+	0	NA	intron (NM_010181, intron 5 of 64)	intron (NM_010181, intron 5 of 64)	47718	NM_010181	14119	Mm.20271	NM_010181	ENSMUSG00000024598	Fbn2	BC063774|Fib-2|mKIAA4226|sne|sy	fibrillin 2	protein-coding
upeaks-20193	chr17	68208928	68209286	+	0	NA	Intergenic	Intergenic	-64690	NM_177278	320858	Mm.137356	NM_177278	ENSMUSG00000041565	L3mbtl4	A730037L19Rik|D930040M24Rik	l(3)mbt-like 4 (Drosophila)	protein-coding
upeaks-22749	chr19	27124263	27124488	+	0	NA	Intergenic	ORR1E|LTR|ERVL-MaLR	-92109	NM_001347441	22359	Mm.4141	NM_013703	ENSMUSG00000024924	Vldlr	AA408956|AI451093|AW047288	very low density lipoprotein receptor	protein-coding
upeaks-23779	chr2	20489120	20489319	+	0	NA	intron (NM_001081006, intron 2 of 21)	intron (NM_001081006, intron 2 of 21)	-20828	NM_029895	208618	Mm.237935	NM_029895	ENSMUSG00000036617	Etl4	6620402G01Rik|9430077C05Rik|BC026657|E330027G05Rik|Etl-4|Skt	enhancer trap locus 4	protein-coding
upeaks-6999	chr11	59991406	59991741	+	0	NA	intron (NM_001290011, intron 2 of 6)	intron (NM_001290011, intron 2 of 6)	-26629	NM_009026	19416	Mm.3903	NM_009026	ENSMUSG00000049892	Rasd1	Dexras1	RAS, dexamethasone-induced 1	protein-coding
upeaks-22931	chr19	38813109	38813336	+	0	NA	intron (NM_021315, intron 5 of 20)	B1F|SINE|Alu	6015	NM_021315	57753	Mm.86482	NM_021315	ENSMUSG00000024999	Noc3l	AF233884|Fad24	NOC3 like DNA replication regulator	protein-coding
upeaks-44330	chr8	117136587	117136839	+	0	NA	Intergenic	Intergenic	-21422	NM_001081151	209239	Mm.132992	NM_001081151	ENSMUSG00000052557	Gan	A330045G18|gigaxonin	giant axonal neuropathy	protein-coding
upeaks-14675	chr14	78850685	78851081	+	0	NA	intron (NM_173758, intron 1 of 25)	intron (NM_173758, intron 1 of 25)	1705	NM_027906	219189	Mm.159651	NM_027906	ENSMUSG00000058997	Vwa8	1300010F03Rik|4932416F07Rik|AI957255|Kiaa0564|mKIAA0564	von Willebrand factor A domain containing 8	protein-coding
upeaks-12480	chr13	74787758	74787986	+	0	NA	intron (NM_001301153, intron 2 of 31)	Lx3A|LINE|L1	-17136	NM_001301156	12380	Mm.29163	NM_009817	ENSMUSG00000021585	Cast	-	calpastatin	protein-coding
upeaks-47694	chrX	59182450	59182678	+	0	NA	intron (NM_001290414, intron 3 of 6)	intron (NM_001290414, intron 3 of 6)	-16476	NM_001290415	14168	Mm.7995	NM_010200	ENSMUSG00000031137	Fgf13	Fhf2	fibroblast growth factor 13	protein-coding
upeaks-6074	chr11	11958537	11958825	+	0	NA	intron (NM_010345, intron 4 of 16)	intron (NM_010345, intron 4 of 16)	-60537	NM_001190448	13195	Mm.12906	NM_016672	ENSMUSG00000020182	Ddc	Aadc	dopa decarboxylase	protein-coding
upeaks-31329	chr4	74612928	74613553	+	0	NA	Intergenic	Intergenic	361361	NM_144787	76804	Mm.209059	NM_144787	ENSMUSG00000028397	Kdm4c	2410141F18Rik|AA517467|Gasc1|Jmjd2c	lysine (K)-specific demethylase 4C	protein-coding
upeaks-35753	chr5	129994551	129994788	+	0	NA	intron (NM_010368, intron 9 of 11)	intron (NM_010368, intron 9 of 11)	8159	NM_010368	110006	Mm.3317	NM_010368	ENSMUSG00000025534	Gusb	AI747421|Gur|Gus|Gus-r|Gus-s|Gus-t|Gus-u|Gut|asd|g	glucuronidase, beta	protein-coding
upeaks-30054	chr3	146311116	146311569	+	0	NA	Intergenic	LTR78|LTR|ERV1	67602	NR_033542	100038607	Mm.365888	NR_033542	ENSMUSG00000105602	Gm10636	ENSMUSG00000074175	predicted gene 10636	ncRNA
upeaks-29560	chr3	123431928	123432284	+	0	NA	Intergenic	Intergenic	-14807	NM_008939	19142	Mm.9431	NM_008939	ENSMUSG00000027978	Prss12	Bssp-3|motopsin	protease, serine 12 neurotrypsin (motopsin)	protein-coding
upeaks-488	chr1	43203390	43203703	+	0	NA	Intergenic	Intergenic	-6785	NM_001289533	14200	Mm.6799	NM_010212	ENSMUSG00000008136	Fhl2	FHL-2|SLIM-3|SLIM3	four and a half LIM domains 2	protein-coding
upeaks-46509	chr9	88553163	88553383	+	0	NA	intron (NM_001142943, intron 2 of 5)	7SLRNA|srpRNA|srpRNA	5253	NM_001142943	71640	Mm.259988	NM_001142943	ENSMUSG00000032425	Zfp949	4930422I07Rik	zinc finger protein 949	protein-coding
upeaks-12758	chr13	94175405	94175726	+	0	NA	intron (NM_172589, intron 3 of 3)	intron (NM_172589, intron 3 of 3)	109716	NM_029153	107767	Mm.201455	NM_029153	ENSMUSG00000021687	Scamp1	4930505M11Rik|AI415563|AW122395	secretory carrier membrane protein 1	protein-coding
upeaks-1876	chr1	132790914	132791380	+	0	NA	Intergenic	Intergenic	-49350	NM_001160317	269116	Mm.326702	NM_182716	ENSMUSG00000026442	Nfasc	AA387016|D430023G06Rik|NF|mKIAA0756	neurofascin	protein-coding
upeaks-27804	chr3	30563397	30563596	+	0	NA	Intergenic	Intergenic	36374	NM_029690	76652	Mm.116928	NM_029690	ENSMUSG00000037737	Actrt3	1700119I24Rik|ARP-T3|Arpm1	actin related protein T3	protein-coding
upeaks-1546	chr1	107950475	107950690	+	0	NA	non-coding (NR_102307, exon 5 of 5)	non-coding (NR_102307, exon 5 of 5)	33323	NR_102307	319596	Mm.136054	NR_102306	ENSMUSG00000100457	D830032E09Rik	-	RIKEN cDNA D830032E09 gene	ncRNA
upeaks-28476	chr3	81975562	81975874	+	0	NA	promoter-TSS (NM_019911)	promoter-TSS (NM_019911)	10	NM_019911	56720	Mm.258622	NM_019911	ENSMUSG00000028011	Tdo2	AA407491|TDO|TO|chky	tryptophan 2,3-dioxygenase	protein-coding
upeaks-42840	chr8	38347559	38347758	+	0	NA	intron (NM_145841, intron 1 of 7)	RLTR9A3|LTR|ERVK	-95456	NR_029884	723860		NR_029884	ENSMUSG00000065457	Mir383	Mirn383|mir-383|mmu-mir-383	microRNA 383	ncRNA
upeaks-20102	chr17	63771026	63771419	+	0	NA	Intergenic	RLTR30D2_MM|LTR|ERV1	-92759	NM_001037997	14158	Mm.23039	NM_008000	ENSMUSG00000000127	Fer	AV082135|C330004K01Rik|Fert|Fert2	fer (fms/fps related) protein kinase	protein-coding
upeaks-29353	chr3	113903353	113903862	+	0	NA	Intergenic	Intergenic	-126933	NM_007729	12814	Mm.209715	NM_007729	ENSMUSG00000027966	Col11a1	C530001D20Rik|cho	collagen, type XI, alpha 1	protein-coding
upeaks-38763	chr6	129220164	129220477	+	0	NA	Intergenic	RLTR16C_MM|LTR|ERVK	17725	NR_040265	76432	Mm.261738	NR_040265	ENSMUSG00000097354	2310001H17Rik	AI646108	RIKEN cDNA 2310001H17 gene	ncRNA
upeaks-4328	chr10	63321783	63322258	+	0	NA	exon (NM_001159589, exon 7 of 8)	exon (NM_001159589, exon 7 of 8)	17015	NM_019812	93759	Mm.351459	NM_019812	ENSMUSG00000020063	Sirt1	AA673258|SIR2L1|Sir2|Sir2a|Sir2alpha	sirtuin 1	protein-coding
upeaks-6400	chr11	32128069	32128283	+	0	NA	Intergenic	ID4_|SINE|ID	-26948	NR_130637	104692	Mm.414035	NR_130637	ENSMUSG00000086386	Gm12108	BB052462|OTTMUSG00000005365	predicted gene 12108	ncRNA
[truncated: 1,080 more rows]

## Sheet: Nkx2-5OE_DifferPeaks
PeakID (cmd=annotatePeaks.pl OE_DEpeaks.bed mm10)	Chr	Start	End	Strand	Peak Score	Focus Ratio/Region Size	Annotation	Detailed Annotation	Distance to TSS	Nearest PromoterID	Entrez ID	Nearest Unigene	Nearest Refseq	Nearest Ensembl	Gene Name	Gene Alias	Gene Description	Gene Type
[truncated: 6,368 more rows]
